# Supplementary material for: The cellular economy of the Saccharomyces cerevisiae zinc proteome
Source: Royal Society of Chemistry journal article supplement (doi:10.1039/c8mt00269j), 2018-01-01
Supplement: c8mt00269j2.xlsx [file c8mt00269j2.xlsx]

## Sheet: 582 zinc proteome
Systematic Name	NCBI code	Gene Name	Uniprot ID	Annotation	Predicted Number of Zinc Ions Per Monomer	Subcellular Location	Zinc ligands	Structural Zn-site classification	Zinc Function	Zn-binding domain	EC number	Enzyme Class
YOL086C	NP_014555	ADH1	P00330	NP_014555.1 alcohol dehydrogenase ADH1 [Saccharomyces cerevisiae S288c]	2	cytosol	C44, H67, E68, C98, C101, C104, C112	ZincNecklaces, NoCluster	Catalytic,Structural	ADH_N	1.1.1.1	oxidoreductase
YKL060C	NP_012863	FBA1	P14540	NP_012863.1 fructose-bisphosphate aldolase FBA1 [Saccharomyces cerevisiae S288c]	1	cytosol	D110, H111, D145, E173, E175, E182, H227, H265, K285, G266, S268	NoCluster	Catalytic	F_bP_aldolase	4.1.2.13	lyase
YKL156W	NP_012766	RPS27A	P35997	NP_012766.1 ribosomal 40S subunit protein S27A [Saccharomyces cerevisiae S288c]	1	cytosol	C37, C56, C59	ZincRibbon	Structural	Ribosomal_S27e
YDR524C	NP_012628	RPL43A	P0CX25	NP_012628.3 ribosomal 60S subunit protein L43B [Saccharomyces cerevisiae S288c]	1	cytosol	C39, C42, C57, C60	TrebleClef	Structural	C4-type
YLR388W	NP_013492	RPS29A	P41057	NP_013492.3 ribosomal 40S subunit protein S29A [Saccharomyces cerevisiae S288c]	1	cytosol	C21, C24, C39, C42	TrebleClef	Structural	Ribosomal_S14
YGL189C	NP_011326	RPS26A	P39938	NP_011326.1 ribosomal 40S subunit protein S26A [Saccharomyces cerevisiae S288c]	1	cytosol	C23, C26, C74, C77	TrebleClef	Structural	Ribosomal_S26e
YDR500C	NP_010788	RPL37B	P51402	NP_010788.1 ribosomal 60S subunit protein L37B [Saccharomyces cerevisiae S288c]	1	cytosol	C19, C22, C34, C37	ZincRibbon	Structural	C4-type
YNL162W	NP_012010	RPL42A	P0CX27	NP_012010.1 ribosomal 60S subunit protein L42B [Saccharomyces cerevisiae S288c]	1	cytosol	C12, C17, H20, H23, C74, C77, C88	ZincRibbon	Structural	Ribosomal_L44 (Pfam)
YDL061C	NP_010222	RPS29B	P41058	NP_010222.1 ribosomal 40S subunit protein S29B [Saccharomyces cerevisiae S288c]	1	cytosol	C21, C24, C39, C42	TrebleClef	Structural	Ribosomal_S14
YLR167W	NP_013268	RPS31	P05759	NP_013268.1 ubiquitin-ribosomal 40S subunit protein S31 fusion protein [Saccharomyces cerevisiae S288c]	1	cytosol	C121, C126, C141, C144	ZincRibbon	Structural	Ribosomal_S27
YLR185W	NP_013286	RPL37A	P49166	NP_013286.1 ribosomal 60S subunit protein L37A [Saccharomyces cerevisiae S288c]	1	cytosol	C19, C22, C34, C37	ZincRibbon	Structural	C4-type
YJR104C	NP_012638	SOD1	P00445	NP_012638.1 superoxide dismutase SOD1 [Saccharomyces cerevisiae S288c]	1	cytosol	H47, H49, H64, H72, H81, D84, H121	NoCluster	Structural	Sod_Cu	1.15.1.1	oxidoreductase
YER091C	NP_011015	MET6	P05694	NP_011015.3 5-methyltetrahydropteroyltriglutamate-homocysteine S-methyltransferase [Saccharomyces cerevisiae S288c]	1	cytosol	H655, C657, E677, C737	ZincRafts	Catalytic	Meth_synt_2	2.1.1.14	transferase
YOL154W	NP_014488	ZPS1	Q12512	NP_014488.1 Zps1p [Saccharomyces cerevisiae S288c]	N/A	cell wall			Transport
YIL148W	NP_012118	RPL40A	P0CH08	NP_012118.1 ubiquitin-ribosomal 60S subunit protein L40A fusion protein [Saccharomyces cerevisiae S288c]	1	cytosol	C96, C99, C110, C115	ZincRibbon	Structural	Ribosomal_L40e
YDL182W	NP_010099	LYS20	P48570	NP_010099.1 homocitrate synthase LYS20 [Saccharomyces cerevisiae S288c]	1	nucleus	E32, H212, H214	ZincRafts	Catalytic	HMGL-like	2.3.3.14	transferase
YHR020W	NP_011884	YHI0	P38708	NP_011884.1 proline--tRNA ligase [Saccharomyces cerevisiae S288c]	1	cytosol	C620, C625, C671, C674	TrebleClef	Structural	ProRS-C_1	6.1.1.15	ligase
YIL078W	NP_116578	THS1	P04801	NP_116578.3 threonine--tRNA ligase THS1 [Saccharomyces cerevisiae S288c]	2	cytosol	C268, H272, C420, H471, H599, H151, H155	ZincRafts	Catalytic	tRNA-synt_2b,tRNA_SAD	6.1.1.3	ligase
YCL030C	NP_009900	HIS4	P00815	NP_009900.2 trifunctional histidinol dehydrogenase/phosphoribosyl-AMP cyclohydrolase/phosphoribosyl-ATP diphosphatase [Saccharomyces cerevisiae S288c]	1	cytosol	Q618, H621, D721, H780	NoCluster	Catalytic	Histidinol_dh	3.5.4.19, 3.6.1.31, 1.1.1.23	hydrolase, oxidoreductase
YPR041W	NP_015366	TIF5	P38431	NP_015366.1 translation initiation factor eIF5 [Saccharomyces cerevisiae S288c]	1	cytosol	C99, C102, C121, C124	ZincRibbon	Structural	eIF-5_eIF-2B
YOR335C	NP_014980	ALA1	P40825	NP_014980.3 alanine--tRNA ligase [Saccharomyces cerevisiae S288c]	1	cytosol	C719, H723, H600, H604	HelicalAnchors	Unknown	tRNA_SAD	6.1.1.7	ligase
YBR218C	NP_009777	PYC2	P32327	NP_009777.1 pyruvate carboxylase 2 [Saccharomyces cerevisiae S288c]	1	cytosol	D567, K735, H765, H767	ZincRafts	Catalytic	HMGL-like	6.4.1.1	ligase
YDL125C	NP_010158	HNT1	Q04344	NP_010158.1 adenosine 5'-monophosphoramidase [Saccharomyces cerevisiae S288c]	1	Unknown	C25-C28-H67-H114	C2H2_ZnFinger	Structural	DcpS_C,HIT	3.-.-.-	hydrolase
YFR044C	NP_116702	DUG1	P43616	NP_116702.1 metallodipeptidase [Saccharomyces cerevisiae S288c]	2	cytosol	H102, D137, E172, D200, H450	NoCluster	Catalytic	Peptidase_M20	3.4.13.-	hydrolase
YER003C	NP_010918	PMI40	P29952	NP_010918.1 mannose-6-phosphate isomerase PMI40 [Saccharomyces cerevisiae S288c]	1	cytosol, nucleus	Q109, H111, E136, H281, E290	ZincRafts	Catalytic	PMI_typeI	5.3.1.8	isomerase
YGL255W	NP_011259	ZRT1	P32804	NP_011259.1 high-affinity Zn(2+) transporter ZRT1 [Saccharomyces cerevisiae S288c]	N/A	plasma membrane	Unknown	Unknown	Transport	ZIP (Pfam)
YGR264C	NP_011780	MES1	P00958	NP_011780.3 methionine--tRNA ligase MES1 [Saccharomyces cerevisiae S288c]	1	cytosol	C337, C340, C350, C353	ZincRibbon	Structural	tRNA-synt_1g	6.1.1.10	ligase
YNL064C	NP_014335	YDJ1	P25491	NP_014335.1 type I HSP40 co-chaperone YDJ1 [Saccharomyces cerevisiae S288c]	2	cytosol	C143, C146, C159, C162, C185, C188, C201, C204	Shuffled_ZnRibbon	Structural	DnaJ_CXXCXGXG
YPL237W	NP_015087	SUI3	P09064	NP_015087.1 translation initiation factor eIF2 subunit beta [Saccharomyces cerevisiae S288c]	1	cytosol	C236, C239, C259, C262	ZincRibbon	Structural	eIF-5_eIF-2B
YNL104C	NP_014295	LEU4	P06208	NP_014295.1 2-isopropylmalate synthase LEU4 [Saccharomyces cerevisiae S288c]	2	mitochondrion	D70, H275, H277, N311	ZincRafts	Catalytic	HMGL-like	2.3.3.13	transferase
YLR244C	NP_013345	MAP1	Q01662	NP_013345.1 methionine aminopeptidase MAP1 [Saccharomyces cerevisiae S288c]	2	cytosol	D219, D230, H294, E327, E358	ZincRafts	Catalytic	Peptidase_M24	3.4.11.18	hydrolase
YBR286W	NP_009845	APE3	P37302	NP_009845.2 Ape3p [Saccharomyces cerevisiae S288c]	2	vacuole	H314, D326, D327, E358, E359, D387, H472	NoCluster	Catalytic	Peptidase_M28	3.4.11.15	hydrolase
YDR429C	NP_010717	TIF35	Q04067	NP_010717.1 translation initiation factor eIF3 core subunit g [Saccharomyces cerevisiae S288c]	1	cytosol	C109, C112, H116, C121	ZincRibbon	Structural	eIF3g
YLR420W	NP_013524	URA4	P20051	NP_013524.1 dihydroorotase [Saccharomyces cerevisiae S288c]	2	cytosol, nucleus	H14, H16	Unknown	Unknown	Unknown	3.5.2.3	hydrolase
YOR168W	NP_014811	GLN4	P13188	NP_014811.3 glutamine--tRNA ligase [Saccharomyces cerevisiae S288c]	1	cytosol	C346, C348, C372, H374	Loosened_ZnRibbon	Structural	tRNA-synt_1c	6.1.1.18	ligase
YDL100C	NP_010183	GET3	Q12154	NP_010183.1 guanine nucleotide exchange factor GET3 [Saccharomyces cerevisiae S288c]	1	ER	C285, C288	TrebleClef	Structural	ArsA_ATPase	3.6.-.-	hydrolase
YGL037C	NP_011478	PNC1	P53184	NP_011478.3 nicotinamidase [Saccharomyces cerevisiae S288c]	1	perixisome	D51, H53, E87, H94, C167	ZincRafts	Catalytic	Isochorismatase	3.5.1.19	hydrolase
YMR083W	NP_013800	ADH3	P07246	NP_013800.1 alcohol dehydrogenase ADH3 [Saccharomyces cerevisiae S288c]	2	mitochondrion	C71, H94, E95, C125, C128, C131, C139, D141	ZincNecklaces, NoCluster	Catalytic,Structural	ADH_N	1.1.1.1	oxidoreductase
YDR127W	NP_010412	ARO1	P08566	NP_010412.1 pentafunctional protein ARO1p [Saccharomyces cerevisiae S288c]	1	cytosol	E189, H279, H295	NoCluster	Catalytic	DHQ_synthase	4.2.3.4, 2.5.1.19, 2.7.1.71, 4.2.1.10, 1.1.1.25	lyase, transferase
YEL020W-A	NP_010894	TIM9	O74700	NP_010894.1 protein transporter TIM9 [Saccharomyces cerevisiae S288c]	1	mitochondrion	C35, C39, C55, C59	Unknown	Structural	zf-Tim10_DDP (Pfam)
YHR098C	NP_011966	SFB3	P38810	NP_011966.1 Sfb3p [Saccharomyces cerevisiae S288c]	1	ER to Golgi	C220, C223, C241, C244	ZincRibbon	Structural	zf-Sec23_Sec24
YHR143W-A	NP_012013	RPC10	P40422	NP_012013.1 DNA-directed RNA polymerase core subunit RPC10 [Saccharomyces cerevisiae S288c]	1	nucleus	C31, C34, C48, C51	ZincRibbon	Structural	DNA_RNApol_7kD
YDL226C	NP_010055	GCS1	P35197	NP_010055.1 Gcs1p [Saccharomyces cerevisiae S288c]	1	ER to Golgi	C26, C29, C46, C49	TrebleClef	Structural	ArfGap
YPR062W	NP_015387	FCY1	Q12178	NP_015387.1 cytosine deaminase [Saccharomyces cerevisiae S288c]	1	cytosol, nucleus	H62, E64, C91, C94	ZincNecklaces, NoCluster	Catalytic	dCMP_cyt_deam_1	3.5.4.1	hydrolase
YMR318C	NP_014051	ADH6	Q04894	NP_014051.3 NADP-dependent alcohol dehydrogenase [Saccharomyces cerevisiae S288c]	2	cytosol	C46, S48, H68, E69, C100, C103, C106, C114	ZincNecklaces, NoCluster	Catalytic,Structural	ADH_N	1.1.1.2	oxidoreductase
YJR029W	NP_012562	TY1B-JR2	P47100	NP_012562.1 gag-pol fusion protein [Saccharomyces cerevisiae S288c]	1	nucleus	H599, H604, C637, C640	Unknown	Structural	Integrase-type zinc finger-like	3.4.23.-, 2.7.7.49, 2.7.7.7, 3.1.26.4	hydrolase, transferase
YJL121C	NP_012414	RPE1	P46969	NP_012414.1 ribulose-phosphate 3-epimerase RPE1 [Saccharomyces cerevisiae S288c]	1	cytosol	H34, D36, H80, D185	ZincRafts	Catalytic	Ribul_P_3_epim	5.1.3.1	isomerase
YPR181C	NP_015507	SEC23	P15303	NP_015507.1 GTPase-activating protein SEC23 [Saccharomyces cerevisiae S288c]	1	ER to Golgi	C56, C61, C80, C83, C35	ZincRibbon	Structural	zf-Sec23_Sec24
YAL060W	NP_009341	BDH1	P39714	NP_009341.2 (R,R)-butanediol dehydrogenase [Saccharomyces cerevisiae S288c]	2	cytosol	C39, S41, H73, E74, C103, C120, C123, C131	ZincNecklaces, NoCluster	Catalytic,Structural	ADH_N	1.1.1.4	oxidoreductase
YPL111W	NP_015214	CAR1	P00812	NP_015214.1 arginase [Saccharomyces cerevisiae S288c]	1	cytosol	Unknown	Unknown	Unknown	Unknown	3.5.3.1	hydrolase
YNL247W	NP_014152	YNL247W	P53852	NP_014152.1 cysteine--tRNA ligase [Saccharomyces cerevisiae S288c]	1	cytosol	C63, C369, H394, E398	HelicalAnchors	Catalytic	tRNA-synt_1e	6.1.1.16	ligase
YDL168W	NP_010113	SFA1	P32771	NP_010113.1 bifunctional alcohol dehydrogenase/S-(hydroxymethyl)glutathione dehydrogenase [Saccharomyces cerevisiae S288c]	2	cytosol	C49, H71, E72, C101, C104, C107, C115	ZincNecklaces, NoCluster	Catalytic,Structural	ADH_N	1.1.1.284, 1.1.1.1, 1.1.1.-	oxidoreductase
YJL172W	NP_012363	CPS1	P27614	NP_012363.1 Gly-Xaa carboxypeptidase [Saccharomyces cerevisiae S288c]	2	vacuole	H168, D205, E240, D268, H547	NoCluster	Catalytic	Peptidase_M20	3.4.17.4	hydrolase
YPL273W	NP_015050	SAM4	Q08985	NP_015050.1 S-adenosylmethionine-homocysteine S-methyltransferase SAM4 [Saccharomyces cerevisiae S288c]	1	cytosol, nucleus	C239, N266, C306, C307	NoCluster	Catalytic	S-methyl_trans	2.1.1.10	transferase
YKL157W	NP_012765	APE2	P32454	NP_012765.3 metallo-aminopeptidase [Saccharomyces cerevisiae S288c]	1	cell wall	H396, H400, E419	HelicalAnchors	Catalytic	Peptidase_M1	3.4.11.-	hydrolase
YIL137C	NP_012129	TMA108	P40462	NP_012129.1 Tma108p [Saccharomyces cerevisiae S288c]	1	cytosol	H330, H334, E353	HelicalAnchors	Catalytic	Peptidase_M1	3.4.11.-	hydrolase
YJR135W-A	NP_058168	TIM8	P57744	NP_058168.1 protein transporter TIM8 [Saccharomyces cerevisiae S288c]	1	mitochondrion	C44, C48, C64, C68	Unknown	Structural	zf-Tim10_DDP (Pfam)
YMR243C	NP_013970	ZRC1	P20107	NP_013970.1 Zn(2+) transporter ZRC1 [Saccharomyces cerevisiae S288c]	N/A	vacuole			Transport
YNL049C	NP_014349	SFB2	P53953	NP_014349.1 COPII subunit SFB2 [Saccharomyces cerevisiae S288c]	1	ER to Golgi	C164, C167, C186, C189	ZincRibbon	Structural	zf-Sec23_Sec24
YHR005C-A	NP_011869	TIM10	P87108	NP_011869.1 protein transporter TIM10 [Saccharomyces cerevisiae S288c]	1	mitochondrion	C40, C44, C61, C65	Unknown	Structural	zf-Tim10_DDP (Pfam)
YBR170C	NP_009729	NPL4	P33755	NP_009729.1 Npl4p [Saccharomyces cerevisiae S288c]	2	ER, nucleus	C204-H208-C216-C219	Unknown	Structural	zf-NPL4
YOR207C	NP_014850	RET1	P22276	NP_014850.1 DNA-directed RNA polymerase III core subunit RET1 [Saccharomyces cerevisiae S288c]	1	nucleus	C1095, C1098, C1107, C1110	ZincRibbon	Structural	RNA_pol_Rpb2_7	2.7.7.6	transferase
YGR181W	NP_011697	TIM13	P53299	NP_011697.3 protein translocase subunit TIM13 [Saccharomyces cerevisiae S288c]	1	mitochondrion	C57, C61, C73, C77	Unknown	Structural	zf-Tim10_DDP (Pfam)
YOR341W	NP_014986	RPA190	P10964	NP_014986.3 DNA-directed RNA polymerase I core subunit RPA190 [Saccharomyces cerevisiae S288c]	2	nucleus	C62, C65, C72, H75, C102, C105, C233, C236	Loosened_ZnRibbon	Structural	RNA_pol_Rpb1_1	2.7.7.6	transferase
YDL131W	NP_010151	LYS21	Q12122	NP_010151.1 homocitrate synthase LYS21 [Saccharomyces cerevisiae S288c]	1	nucleus	E46, H226, H228	ZincRafts	Catalytic	HMGL-like	2.3.3.14	transferase
YOR210W	NP_014853	RPB10	P22139	NP_014853.3 DNA-directed RNA polymerase core subunit RPB10 [Saccharomyces cerevisiae S288c]	1	nucleus	C7, C10, C45, C46	TrebleClef	Structural	RNA_pol_N
YIL108W	NP_012158	YIK8	P40483	NP_012158.1 putative metalloendopeptidase [Saccharomyces cerevisiae S288c]	1	cytosol	H318, H322, H328	Unknown	Unknown	Unknown	3.4.24.-	hydrolase
YDL140C	NP_010141	RPO21	P04050	NP_010141.1 DNA-directed RNA polymerase II core subunit RPO21 [Saccharomyces cerevisiae S288c]	2	cytosol, nucleus	C67, Q68, C70, C77, H80, C107, M108, C110, V147, C148, C167	Loosened_ZnRibbon	Structural	RNA_pol_Rpb1_1	2.7.7.6	transferase
YER131W	NP_011057	RPS26B	P39939	NP_011057.1 ribosomal 40S subunit protein S26B [Saccharomyces cerevisiae S288c]	1	cytosol	C23, C26, C74, C77	TrebleClef	Structural	Ribosomal_S26e
YOR151C	NP_014794	RPB2	P08518	NP_014794.3 DNA-directed RNA polymerase II core subunit RPB2 [Saccharomyces cerevisiae S288c]	1	cytosol, nucleus	C1163, C1166, C1182, C1185	ZincRibbon	Structural	RNA_pol_Rpb2_7	2.7.7.6	transferase
YGL187C	NP_011328	COX4	P04037	NP_011328.1 cytochrome c oxidase subunit IV [Saccharomyces cerevisiae S288c]	1	mitochondrion	C111, H119, C134, C137	Loosened_ZnRibbon	Structural	COX5B	1.9.3.1	oxidoreductase
YGL043W	NP_011472	DST1	P07273	NP_011472.1 Dst1p [Saccharomyces cerevisiae S288c]	1	nucleus	C271, K273, C274, C299, C302	ZincRibbon	Structural	TFIIS_C
YER122C	NP_011048	GLO3	P38682	NP_011048.1 ADP-ribosylation factor GTPase-activating protein [Saccharomyces cerevisiae S288c]	1	ER to Golgi	C31, C34, C51, C54	TrebleClef	Structural	ArfGap
YGR267C	NP_011783	FOL2	P51601	NP_011783.1 GTP cyclohydrolase I [Saccharomyces cerevisiae S288c]	1	cytosol, nucleus	C132, H135, C203	C2H2_ZnFinger	Catalytic	GTP_cyclohydroI	3.5.4.16	hydrolase
YPL212C	NP_015112	PUS1	Q12211	NP_015112.1 pseudouridine synthase PUS1 [Saccharomyces cerevisiae S288c]	1	nucleus	Unknown	Unknown	Unknown	Unknown	5.4.99.-	isomerase
YIL109C	NP_012157	SEC24	P40482	NP_012157.3 COPII subunit SEC24 [Saccharomyces cerevisiae S288c]	1	ER to Golgi	C231, C234, C253, C256	ZincRibbon	Structural	zf-Sec23_Sec24
YFR004W	NP_116659	RPN11	P43588	NP_116659.1 proteasome regulatory particle lid subunit RPN11 [Saccharomyces cerevisiae S288c]	1	cytosol,nucleus	H109, H111, D122	C2H2_ZnFinger	Catalytic	Prok-JAB,JAB	3.4.19.12	hydrolase
YIR008C	NP_012273	PRI1	P10363	NP_012273.1 DNA primase subunit PRI1 [Saccharomyces cerevisiae S288c]	1	nucleus	C123, C124, C130, C133	NoCluster	Unknown	DNA_primase_S	2.7.7.-	transferase
YPR010C	NP_015335	RPA135	P22138	NP_015335.1 DNA-directed RNA polymerase I core subunit RPA135 [Saccharomyces cerevisiae S288c]	1	nucleus	C1104, C1107	ZincRibbon	Structural	RNA_pol_Rpb2_7	2.7.7.6	transferase
YDR430C	NP_010718	CYM1	P32898	NP_010718.1 Cym1p [Saccharomyces cerevisiae S288c]	1	mitochondrion	H84, H88	HelicalAnchors	Catalytic	Peptidase_M16	3.4.24.-	hydrolase
YGR211W	NP_011727	ZPR1	P53303	NP_011727.3 zinc finger-containing protein ZPR1 [Saccharomyces cerevisiae S288c]	2	cytosol, nucleus	C54, C57, C83, C86, C295, C298, C324, C327	ZincRibbon	Structural	zf-ZPR1
YGL040C	NP_011475	HEM2	P05373	NP_011475.1 porphobilinogen synthase HEM2 [Saccharomyces cerevisiae S288c]	1	cytosol, nucleus	C133, C135, C143, D180	NoCluster	Catalytic	ALAD	4.2.1.24	lyase
YDR120C	NP_010405	TRM1	P15565	NP_010405.3 tRNA (guanine26-N2)-dimethyltransferase [Saccharomyces cerevisiae S288c]	1	nucleus	C330, C333, C370, C373	ZincRibbon	Structural	TRM	2.1.1.216	transferase
YOL057W	NP_014584	DPP3	Q08225	NP_014584.1 dipeptidyl-peptidase III [Saccharomyces cerevisiae S288c]	1	cytosol, nucleus	H460, H465, E517	HelicalAnchors	Catalytic	Peptidase_M49	3.4.14.4	hydrolase
YNL330C	NP_014069	RPD3	P32561	NP_014069.1 histone deacetylase RPD3 [Saccharomyces cerevisiae S288c]	1	nucleus	H38, D184, D186, H188, S207, F208, D274	ZincNecklaces, NoCluster	Catalytic	Hist_deacetyl	3.5.1.98	hydrolase
YGL256W	NP_011258	ADH4	P10127	NP_011258.2 alcohol dehydrogenase ADH4 [Saccharomyces cerevisiae S288c]	1	mitochondrion	D195, H199, H264, H278, H275	NoCluster	Catalytic	Fe-ADH_2,Fe-ADH	1.1.1.1	oxidoreductase
YLR401C	NP_013505	DUS3	Q06053	NP_013505.4 tRNA dihydrouridine synthase DUS3 [Saccharomyces cerevisiae S288c]	2	nucleus	C98, C109, C115, H119, C140, C149, C155, H161	NoCluster	Structural	C3H1-type, C3H1-type	1.3.1.89	oxidoreductase
YDR272W	NP_010558	GLO2	Q05584	NP_010558.3 hydroxyacylglutathione hydrolase GLO2 [Saccharomyces cerevisiae S288c]	2	cytosol	H59, H61, D63, H64, H121, D144, H188	ZincNecklaces	Catalytic	Lactamase_B	3.1.2.6	hydrolase
YFR037C	NP_116695	RSC8	P43609	NP_116695.3 Rsc8p [Saccharomyces cerevisiae S288c]	1	nucleus	C260, C263, C283, C286	TrebleClef, C2H2_ZnFinger	Structural	ZZ
YJR063W	NP_012597	RPA12	P32529	NP_012597.1 DNA-directed RNA polymerase I core subunit RPA12 [Saccharomyces cerevisiae S288c]	2	nucleus	C10, C13, C30, Q32, C33, C86, C89, C114, C117	ZincRibbon	Structural	RNA_POL_M_15KD,TFIIS_C
YGL019W	NP_011496	CKB1	P43639	NP_011496.3 casein kinase 2 regulatory subunit CKB1 [Saccharomyces cerevisiae S288c]	1	cytosol, nucleus	C156, C161, C184, C187	ZincRibbon	Structural	CK_II_beta
YOR316C	NP_014961	COT1	P32798	NP_014961.3 metal cation transporter COT1 [Saccharomyces cerevisiae S288c]	N/A	vacuole			Transport
YNL141W	NP_014258	AAH1	P53909	NP_014258.1 adenine deaminase [Saccharomyces cerevisiae S288c]	1	cytosol, nucleus	H16, H18, H204, D285	NoCluster	Catalytic	A_deaminase	3.5.4.2	hydrolase
YNL045W	NP_014353	LAP2	Q10740	NP_014353.1 bifunctional aminopeptidase/epoxide hydrolase [Saccharomyces cerevisiae S288c]	1	cytosol, nucleus	H340, H344, E363	HelicalAnchors	Catalytic	Peptidase_M1	3.3.2.6	hydrolase
YNR046W	NP_014444	TRM112	P53738	NP_014444.1 RNA methylation protein TRM112 [Saccharomyces cerevisiae S288c]	1	cytosol, nucleus	C11, C16, C112, C115	Unknown	Unknown	Unknown
YFL016C	NP_116638	MDJ1	P35191	NP_116638.1 Mdj1p [Saccharomyces cerevisiae S288c]	2	mitochondrion	C230, C233, C247, C250, C269, C272, C285, C288	Shuffled_ZnRibbon	Structural	DnaJ_CXXCXGXG
YGR063C	NP_011577	SPT4	P32914	NP_011577.3 transcription elongation factor SPT4 [Saccharomyces cerevisiae S288c]	1	nucleus	C7, C10, C24, C27	ZincRibbon	Structural	Spt4
YHR132C	NP_012000	ECM14	P38836	NP_012000.1 putative metallocarboxypeptidase [Saccharomyces cerevisiae S288c]	1	vacuole	H182, E185, H310	ZincNecklaces	Catalytic	Peptidase_M14	3.4.17.-	hydrolase
YDR481C	NP_010769	PHO8	P11491	NP_010769.3 alkaline phosphatase PHO8 [Saccharomyces cerevisiae S288c]	2	vacuolar membrane	D75, S123, D174, T176, E325, D330, H334, D373, H374, H484	NoCluster	Catalytic	Alk_phosphatase	3.1.3.1, 3.1.3.54, 3.1.7.6	hydrolase
YJR117W	NP_012651	STE24	P47154	NP_012651.1 zinc metalloprotease [Saccharomyces cerevisiae S288c]	1	ER	H297, H301, E390, H434	HelicalAnchors	Catalytic	Peptidase_M48	3.4.24.84	hydrolase
YKL112W	NP_012810	ABF1	P14164	NP_012810.1 DNA-binding protein ABF1 [Saccharomyces cerevisiae S288c]	1	nucleus	C49-C66-C71	Unknown	Unknown	BAF1_ABF1
YBR145W	NP_009703	ADH5	P38113	NP_009703.3 alcohol dehydrogenase ADH5 [Saccharomyces cerevisiae S288c]	2	cytosol, nucleus	C47, S49, H70, E71, C101, C104, C107, C115	ZincNecklaces, NoCluster	Catalytic,Structural	ADH_N	1.1.1.1	oxidoreductase
YMR214W	NP_013941	SCJ1	P25303	NP_013941.2 Scj1p [Saccharomyces cerevisiae S288c]	2	ER	C169, C172, C185, C188, C211, C214, C225, C228	Shuffled_ZnRibbon	Structural	DnaJ_CXXCXGXG,Anti-TRAP
YLR074C	NP_013175	BUD20	Q08004	NP_013175.1 Bud20p [Saccharomyces cerevisiae S288c]	1	cytosol,nucleus	C51, C54, H67, H73	C2H2_ZnFinger	Structural	zf-C2H2_jaz
YIL044C	NP_012220	AGE2	P40529	NP_012220.3 Age2p [Saccharomyces cerevisiae S288c]	1	cytosol	C23, C26, C44, C47	TrebleClef	Structural	ArfGap
YAR007C	NP_009404	RFA1	P22336	NP_009404.1 replication factor A subunit protein RFA1 [Saccharomyces cerevisiae S288c]	1	cytosol, nucleus	C486, C491, C505, C508	ZincRibbon	Structural	Rep_fac-A_C
YCL057W	NP_009874	PRD1	P25375	NP_009874.1 metalloendopeptidase [Saccharomyces cerevisiae S288c]	1	cytosol	H501, H505, E531	HelicalAnchors	Catalytic	Peptidase_M3	3.4.24.37	hydrolase
YIL021W	NP_012243	RPB3	P16370	NP_012243.3 DNA-directed RNA polymerase II core subunit RPB3 [Saccharomyces cerevisiae S288c]	1	nucleus	C86, C88, C92, C95	ZincNecklaces	Structural	RNA_pol_A_bac
YHR047C	NP_011913	AAP1	P37898	NP_011913.1 arginine/alanine aminopeptidase [Saccharomyces cerevisiae S288c]	1	cytosol, nucleus	H300, H304, E323	HelicalAnchors	Catalytic	Peptidase_M1	3.4.11.-	hydrolase
YHR113W	NP_011981	APE4	P38821	NP_011981.1 aspartyl aminopeptidase [Saccharomyces cerevisiae S288c]	2	vacuole	H97, D273, E309, D362, H456	NoCluster	Catalytic	Peptidase_M18	3.4.11.21	hydrolase
YLR163C	NP_013264	MAS1	P10507	NP_013264.1 Mas1p [Saccharomyces cerevisiae S288c]	1	mitochondrion	H70, H74, E150	HelicalAnchors	Catalytic	Peptidase_M16	3.4.24.64	hydrolase
YML123C	NP_013583	PHO84	P25297	NP_013583.1.	N/A	plasma membrane			Transport
YIL106W	NP_012160	MOB1	P40484	NP_012160.2 Mob1p [Saccharomyces cerevisiae S288c]	1	cytosol	C179, C184, H261, H266	C2H2_ZnFinger	Structural	Mob1_phocein
YLR116W	NP_013217	MSL5	Q12186	NP_013217.1 mRNA splicing protein MSL5 [Saccharomyces cerevisiae S288c]	2	cytosol, nucleus	C299, C302, H307, C312	Shuffled_ZnRibbonII	Structural	zf-CCHC
YPR086W	NP_015411	SUA7	P29055	NP_015411.1 transcription factor TFIIB [Saccharomyces cerevisiae S288c]	1	nucleus	C24, C27, C45, C48	ZincRibbon	Structural	TF_Zn_Ribbon
YDR264C	NP_010550	AKR1	P39010	NP_010550.1 palmitoyltransferase AKR1 [Saccharomyces cerevisiae S288c]	1 or 2	Golgi	C443, H450, C472, D497, H498, C500, C533	ZincRibbon	Structural	zf-DHHC (Pfam)	2.3.1.225	transferase
YOL098C	NP_014543	SDD3	Q12496	NP_014543.1 Sdd3p [Saccharomyces cerevisiae S288c]	1	cytosol	H60, H64, E135, E142	HelicalAnchors	Catalytic	Peptidase_M16
YOR108W	NP_014751	LEU9	Q12166	NP_014751.1 2-isopropylmalate synthase LEU9 [Saccharomyces cerevisiae S288c]	1	mitochondrion	D69, H274, H276, N310	ZincRafts	Catalytic	HMGL-like	2.3.3.13	transferase
YML004C	NP_013710	GLO1	P50107	NP_013710.1 lactoylglutathione lyase GLO1 [Saccharomyces cerevisiae S288c]	2 o 3	cytosol, nucleus	H25, E89, H117, E163, H185, E242, H269, E318	ZincRafts	Catalytic	Glyoxalase,Glyoxalase_4	4.4.1.5	lyase
YOR091W	NP_014734	TMA46	Q12000	NP_014734.2 Tma46p [Saccharomyces cerevisiae S288c]	2	cytosol	C93, C101, C107, H111, C164, C182, C189, H193	ZincNecklaces	Unknown	Torus
YML035C	NP_013677	AMD1	P15274	NP_013677.1 AMP deaminase [Saccharomyces cerevisiae S288c]	1	cytosol	H362, H364, H630, D707	NoCluster	Catalytic	A_deaminase	3.5.4.6	hydrolase
YDR266C	NP_010552	HEL2	Q05580	NP_010552.3 E3 ubiquitin-protein ligase HEL2 [Saccharomyces cerevisiae S288c]	2	cytosol	C64, C67, C79, H81, C84, C87, C100, C103	TrebleClef, Loosened_ZnRibbon, ZincRibbon	Structural	zf-C3HC4_3	2.3.2.27	transferase
YGL062W	NP_011453	PYC1	P11154	NP_011453.1 pyruvate carboxylase 1 [Saccharomyces cerevisiae S288c]	1	cytosol	D566, K734, H764, H766	ZincRafts	Catalytic	HMGL-like	6.4.1.1	ligase
YPR024W	NP_015349	YME1	P32795	NP_015349.1 i-AAA protease YME1 [Saccharomyces cerevisiae S288c]	1	mitochondrion	H540, H544, D618	HelicalAnchors	Catalytic	Peptidase_M41	3.4.24.-	hydrolase
YGL071W	NP_011444	AFT1	P22149	NP_011444.1 DNA-binding transcription factor AFT1 [Saccharomyces cerevisiae S288c]	1	cytosol, nucleus	C143, C215, H239, H241	NoCluster	Structural	AFT
YDL122W	NP_010161	UBP1	P25037	NP_010161.1 ubiquitin-specific protease UBP1 [Saccharomyces cerevisiae S288c]	1	cytosol	C337, C340, C387, C390	Unknown	Structural	Unknown	3.4.19.12	hydrolase
YGL201C	NP_011314	MCM6	P53091	NP_011314.2 MCM DNA helicase complex subunit MCM6 [Saccharomyces cerevisiae S288c]	1	cytosol, nucleus	C311, C314, C333, C338	ZincRibbon	Structural	MCM_OB	3.6.4.12	hydrolase
YGL101W	NP_011414	YGL101W	P53144	NP_011414.1 hypothetical protein YGL101W [Saccharomyces cerevisiae S288c]	1	cytosol, nucleus	H61, D90	NoCluster	Catalytic	HD
YDR303C	NP_010589	RSC3	Q06639	NP_010589.3 Rsc3p [Saccharomyces cerevisiae S288c]	2	nucleus	C14, C17, C24, C31, C34, C42	Zn2Cys6_ZnFinger	Structural	Zn_clus
YLR389C	NP_013493	STE23	Q06010	NP_013493.2 metalloendopeptidase [Saccharomyces cerevisiae S288c]	1	mitochondrion	H118, H122, E192, E199	HelicalAnchors	Catalytic	Peptidase_M16	3.4.24.-	hydrolase
YPR019W	NP_015344	MCM4	P30665	NP_015344.1 MCM DNA helicase complex subunit MCM4 [Saccharomyces cerevisiae S288c]	1	cytosol, nucleus	C349, C352, C371, C376	ZincRibbon	Structural	MCM_OB	3.6.4.12	hydrolase
YGL181W	NP_011334	GTS1	P40956	NP_011334.1 Gts1p [Saccharomyces cerevisiae S288c]	1	cytosol, nucleus	C30, C33, C50, C53	TrebleClef	Structural	ArfGap
YDR049W	NP_010334	VMS1	Q04311	NP_010334.1 Vms1p [Saccharomyces cerevisiae S288c]	1	cytosol	C74, C77, H90, H96	Unknown	Structural	Unknown
YMR080C	NP_013797	NAM7	P30771	NP_013797.1 ATP-dependent RNA helicase NAM7 [Saccharomyces cerevisiae S288c]	3	cytosol	C62, C65, C76, C79, C84, H94, H98, H104, C122, C125, C148, C152	TrebleClef	Structural	UPF1_Zn_bind	3.6.4.-	hydrolase
YER068W	NP_010991	MOT2	P34909	NP_010991.3 CCR4-NOT core ubiquitin-protein ligase subunit MOT2 [Saccharomyces cerevisiae S288c]	2 or 3	cytosol	C33, C36, C50, C52, C57, C60, C74, C77	TrebleClef, Loosened_ZnRibbon, ZincRibbon	Structural	zf-C3HC4_3,zf-RING_4
YDR390C	NP_010678	UBA2	P52488	NP_010678.3 E1 ubiquitin-activating protein UBA2 [Saccharomyces cerevisiae S288c]	1	nucleus	C162, C165, C435	TrebleClef	Structural	ThiF
YCR003W	NP_009929	MRPL32	P25348	NP_009929.1 mitochondrial 54S ribosomal protein YmL32 [Saccharomyces cerevisiae S288c]	1	mitochondrion	C104, C107, C117, C120	ZincRibbon	Structural	Ribosomal_L32p
YMR319C	NP_014052	FET4	P40988	NP_014052.1.	N/A	plasma membrane			Transport
YDR216W	NP_010502	ADR1	P07248	NP_010502.3 DNA-binding transcription factor ADR1 [Saccharomyces cerevisiae S288c]	2	nucleus	C106, V108, C109, H122, H126, C134, C137, H150, H155	C2H2_ZnFinger	Structural	zf-C2H2,zf-H2C2_2
YMR089C	NP_013807	YTA12	P40341	NP_013807.1 m-AAA protease subunit YTA12 [Saccharomyces cerevisiae S288c]	1	mitochondrion	H613, H617, D689	HelicalAnchors	Catalytic	Peptidase_M41	3.4.24.-	hydrolase
YNL186W	NP_014213	UBP10	P53874	NP_014213.2 ubiquitin-specific protease UBP10 [Saccharomyces cerevisiae S288c]	1	nucleus	C500-C503-C610-C613	ZincRibbon	Structural	UCH_1	3.4.19.12	hydrolase
YHR111W	NP_011979	UBA4	P38820	NP_011979.1 Uba4p [Saccharomyces cerevisiae S288c]	1	cytosol	C208, C211, C286, H358	TrebleClef, ZincNecklaces	Structural	ThiF,Rhodanese	2.7.7.-, 2.8.1.-	transferase
YDL074C	NP_010209	BRE1	Q07457	NP_010209.1 E3 ubiquitin-protein ligase BRE1 [Saccharomyces cerevisiae S288c]	2	nucleus	C648, C651, C663, H665, C668, C671, C683, C686	TrebleClef, Loosened_ZnRibbon, ZincRibbon, Zn2Cys6_ZnFinger	Structural	zf-C3HC4,zf-C3HC4_3,Prok-RING_4,zf-RING_5,zf-C3HC4_2	2.3.2.27	transferase
YBL033C	NP_009520	RIB1	P38066	NP_009520.1 GTP cyclohydrolase II [Saccharomyces cerevisiae S288c]	1	cytosol, nucleus	C148, C159, C161	NoCluster	Catalytic	GTP_cyclohydro2	3.5.4.25	hydrolase
YGL023C	NP_011492	PIB2	P53191	NP_011492.3 Pib2p [Saccharomyces cerevisiae S288c]	2	vacuole	C458, C461, C474, C477, C482, H485, C519, C522	TrebleClef	Structural	FYVE
YNL036W	NP_014362	NCE103	P53615	NP_014362.3 carbonate dehydratase NCE103 [Saccharomyces cerevisiae S288c]	1	mitochondrion	C57, D59, H112, C115	ZincNecklaces	Catalytic	Pro_CA	4.2.1.1	lyase
YDL174C	NP_010107	DLD1	P32891	NP_010107.1 D-lactate dehydrogenase [Saccharomyces cerevisiae S288c]	from 4 to 6	mitochondrion	Unknown - The number of zinc is reported in the Uniprot database	Unknown	Unknown	Unknown	1.1.2.4	oxidoreductase
YNL102W	NP_014297	POL1	P13382	NP_014297.3 DNA-directed DNA polymerase alpha catalytic subunit POL1 [Saccharomyces cerevisiae S288c]	2	nucleus	C1287, C1290, C1314, C1317, C1348, C1353, C1367, C1372	ZincRibbon	Structural	zf-DNA_Pol	2.7.7.7	transferase
YNL310C	NP_014089	ZIM17	P42844	NP_014089.2 Zim17p [Saccharomyces cerevisiae S288c]	1	mitochondrion	C75, C78, C100, C103	ZincRibbon	Structural	zf-DNL
YCL033C	NP_009897	MXR2	P25566	NP_009897.1 Mxr2p [Saccharomyces cerevisiae S288c]	1	mitochondrion	C79, C82, C128, C131	ZincRibbon	Structural	SelR	1.8.4.12	oxidoreductase
YOR001W	NP_014643	RRP6	Q12149	NP_014643.1 exosome nuclease subunit RRP6 [Saccharomyces cerevisiae S288c]	1	nucleus	D238, E240, D296, D365	ZincRafts	Catalytic	DNA_pol_A_exo1	3.1.13.-	hydrolase
YKL160W	NP_012762	ELF1	P36053	NP_012762.1 Elf1p [Saccharomyces cerevisiae S288c]	1	nucleus	C25, C28, C49, C52	ZincRibbon	Structural	Elf1
YKL175W	NP_012746	ZRT3	P34240	NP_012746.1 Zn(2+) transporter ZRT3 [Saccharomyces cerevisiae S288c]	N/A	vacuolar membrane	Unknown		Transport	ZIP (Pfam)
YKR038C	NP_012964	KAE1	P36132	NP_012964.2 tRNA N6-adenosine threonylcarbamoyltransferase [Saccharomyces cerevisiae S288c]	1	cytosol, nucleus	H141, H145, D344	HelicalAnchors	Catalytic	Peptidase_M22	2.3.1.234	transferase
YOR039W	NP_014682	CKB2	P38930	NP_014682.1 casein kinase 2 regulatory subunit CKB2 [Saccharomyces cerevisiae S288c]	1	cytosol, nucleus	C139, C144, C167, C170	ZincRibbon	Structural	CK_II_beta
YKR079C	NP_013005	TRZ1	P36159	NP_013005.1 tRNase Z [Saccharomyces cerevisiae S288c]	2	cytosol, nucleus	Unknown	Unknown	Unknown	Lactamase_B_4	3.1.26.11	hydrolase
YNR006W	NP_014403	VPS27	P40343	NP_014403.3 ESCRT-0 subunit protein VPS27 [Saccharomyces cerevisiae S288c]	2	endosome	C176, C179, C192, C195, C200, H203, C222, C225	TrebleClef	Structural	FYVE
YMR070W	NP_013786	MOT3	P54785	NP_013786.1 Mot3p [Saccharomyces cerevisiae S288c]	1	cytosol, nucleus	C348, C351, H364, H368	C2H2_ZnFinger	Structural	Unknown
YNL116W	NP_014283	DMA2	P53924	NP_014283.3 ubiquitin-conjugating protein DMA2 [Saccharomyces cerevisiae S288c]	2	cytosol	C433, C436, C451, H453, H456, C459, C473, C476	TrebleClef, ZincRibbon	Structural	zf-RING_2,zf-RING_11	2.3.2.27	transferase
YGR246C	NP_011762	BRF1	P29056	NP_011762.1 transcription factor TFIIIB subunit BRF1 [Saccharomyces cerevisiae S288c]	1	nucleus	C4, C7, C25, C28	ZincRibbon	Structural	TF_Zn_Ribbon
YDR096W	NP_010381	GIS1	Q03833	NP_010381.1 histone demethylase GIS1 [Saccharomyces cerevisiae S288c]	2	cytosol, nucleus	C250, H256, H846, H851, C859, C862, C830, C833	C2H2_ZnFinger	Structural	zf-H2C2_2
YPL116W	NP_015209	HOS3	Q02959	NP_015209.1 histone deacetylase [Saccharomyces cerevisiae S288c]	1	cytosol	D231, D233, H235, S278, D370	ZincNecklaces, NoCluster	Catalytic	Hist_deacetyl	3.5.1.98	hydrolase
YBR058C	NP_009614	UBP14	P38237	NP_009614.2 ubiquitin-specific protease UBP14 [Saccharomyces cerevisiae S288c]	4	cytosol	C192, C195, C204, C207, C212, H224, H228, H235, C253, C256, C455, C458, C501, C504	TrebleClef, C2H2_ZnFinger	Structural	zf-UBP,UCH_1	3.4.19.12	hydrolase
YDR316W-B	NP_058150	TY1B-DR5	P0C2I2	NP_058150.1 gag-pol fusion protein [Saccharomyces cerevisiae S288c]	1	nucleus	H599, H604, C637, C640	Unknown	Structural	Integrase-type zinc finger-like	3.4.23.-, 2.7.7.49, 2.7.7.7, 3.1.26.4	hydrolase, transferase
YBR202W	NP_009761	MCM7	P38132	NP_009761.4 mini-chromosome maintenance complex protein 7 [Saccharomyces cerevisiae S288c]	1	cytosol, nucleus	C262, C265, C284, C289	ZincRibbon	Structural	MCM_OB	3.6.4.12	hydrolase
YBR281C	NP_009840	DUG2	P38149	NP_009840.3 glutamine amidotransferase subunit DUG2 [Saccharomyces cerevisiae S288c]	2	cytosol, nucleus	H520, D553, E587, H853	NoCluster	Catalytic	Peptidase_M20	3.4.-.-	hydrolase
YKL062W	NP_012861	MSN4	P33749	NP_012861.1 stress-responsive transcriptional activator MSN4 [Saccharomyces cerevisiae S288c]	2	nucleus	C575, C578, K580, H591, H596, C604, C607, H620, H624	C2H2_ZnFinger	Structural	zf-C2H2,zf-H2C2_2
YDR448W	NP_010736	ADA2	Q02336	NP_010736.3 chromatin-binding transcription regulator ADA2 [Saccharomyces cerevisiae S288c]	2	nucleus	C7, C10, C22, C25, C31, C34, H44, H48	TrebleClef, C2H2_ZnFinger	Structural	ZZ
YKL114C	NP_012808	APN1	P22936	NP_012808.1 DNA-(apurinic or apyrimidinic site) lyase APN1 [Saccharomyces cerevisiae S288c]	3	mitochondrion,nucleus	E158, D192, H195, H229, D242, H244	NoCluster	Catalytic	AP_endonuc_2	4.2.99.18	lyase
YLR387C	NP_013491	REH1	Q06709	NP_013491.1 Reh1p [Saccharomyces cerevisiae S288c]	2	cytosol	C188, C191, H204, H209, C239, C242, H255, H261	C2H2_ZnFinger	Structural	zf-C2H2_2
YGL122C	NP_011393	NAB2	P32505	NP_011393.3 mRNA-binding protein NAB2 [Saccharomyces cerevisiae S288c]	7	cytosol, nucleus	C340, C346, C351, H355, C415, C421, C426, H430, C458, C464, C469, H473, C262, C268, C274, H278, C283, C289, C296, H300, C371, C377, C382, H386	Unknown	Structural	zf-CCCH_2
YNL262W	NP_014137	POL2	P21951	NP_014137.1 DNA polymerase epsilon catalytic subunit [Saccharomyces cerevisiae S288c]	1	nucleus	C2108, C2111, C2130, C2133	Unknown	Structural	CysA-type	2.7.7.7	transferase
YIL079C	NP_012186	AIR1	P40507	NP_012186.1 TRAMP complex RNA-binding subunit [Saccharomyces cerevisiae S288c]	4	nucleus	C175, C178, H183, C188, C76, C79, H84, C89, C94, C97, H103, C108, C136, C139, H144, C149	Shuffled_ZnRibbonII	Structural	zf-CCHC
YGL156W	NP_011359	AMS1	P22855	NP_011359.1 alpha-mannosidase [Saccharomyces cerevisiae S288c]	1	vacuolar membrane	H298, D300, D411, H626	NoCluster	Catalytic	Glyco_hydro_38,Alpha-mann_mid	3.2.1.24	hydrolase
YOR116C	NP_014759	RPO31	P04051	NP_014759.1 DNA-directed RNA polymerase III core subunit RPO31 [Saccharomyces cerevisiae S288c]	2	nucleus	C67, C70, C77, H80, C107, C110, C154, C157	Loosened_ZnRibbon	Structural	RNA_pol_Rpb1_1	2.7.7.6	transferase
YBL005W-B	NP_009549	TY1B-BL	Q12490	NP_009549.1 gag-pol fusion protein [Saccharomyces cerevisiae S288c]	1	nucleus	H599, H604, C637, C640	Unknown	Structural	Integrase-type zinc finger-like	3.4.23.-, 2.7.7.49, 2.7.7.7, 3.1.26.4	hydrolase, transferase
YMR045C	NP_013759	TY1B-MR1	Q04214	NP_013759.1 gag-pol fusion protein [Saccharomyces cerevisiae S288c]	1	nucleus	H599, H604, C637, C640	Unknown	Structural	Integrase-type zinc finger-like	3.4.23.-, 2.7.7.49, 2.7.7.7, 3.1.26.4	hydrolase, transferase
YGL035C	NP_011480	MIG1	P27705	NP_011480.1 transcription factor MIG1 [Saccharomyces cerevisiae S288c]	2	cytosol, nucleus	H56, H60, C68, C73, H86, H90	C2H2_ZnFinger	Structural	zf-H2C2_2
YDR379W	NP_010667	RGA2	Q06407	NP_010667.1 Rga2p [Saccharomyces cerevisiae S288c]	4	cytosol	C13, C16, H34, C37, C40, C43, C63, C66, C70, C73, C95, C98, C101, C119, C122	TrebleClef	Structural	LIM
YBL023C	NP_009530	MCM2	P29469	NP_009530.1 MCM DNA helicase complex subunit MCM2 [Saccharomyces cerevisiae S288c]	1	cytosol, nucleus	C341, C344, C364, C367	ZincRibbon	Structural	MCM_OB	3.6.4.12	hydrolase
YER017C	NP_010933	AFG3	P39925	NP_010933.1 AAA family ATPase AFG3 [Saccharomyces cerevisiae S288c]	1	mitochondrion	H558, H562, D634	HelicalAnchors	Catalytic	Peptidase_M41	3.4.24.-	hydrolase
YDL167C	NP_010114	NRP1	P32770	NP_010114.1 Nrp1p [Saccharomyces cerevisiae S288c]	2	cytosol	C361, C364, C375, C378, C587, C590, C601, C604	ZincRibbon	Structural	zf-RanBP
YLR274W	NP_013376	MCM5	P29496	NP_013376.1 MCM DNA helicase complex subunit MCM5 [Saccharomyces cerevisiae S288c]	1	cytosol, nucleus	C183, C186, C211, C236	ZincRibbon	Structural	MCM_OB	3.6.4.12	hydrolase
YNL027W	NP_014371	CRZ1	P53968	NP_014371.1 DNA-binding transcription factor CRZ1 [Saccharomyces cerevisiae S288c]	2	cytosol, nucleus	C571, V573, C574, K576, H587, H591, C599, C602, H619	C2H2_ZnFinger	Structural	zf-C2H2,zf-met,zf-H2C2_2
YOR056C	NP_014699	NOB1	Q08444	NP_014699.1 rRNA-binding endoribonuclease [Saccharomyces cerevisiae S288c]	1	cytosol, nucleus	C304, C307, C323, C326	ZincRibbon	Structural	NOB1_Zn_bind	3.1.-.-	hydrolase
YIL130W	NP_012136	ASG1	P40467	NP_012136.1 Asg1p [Saccharomyces cerevisiae S288c]	2	nucleus	C21, C24, C31, C37, C40, C47	Zn2Cys6_ZnFinger	Structural	Zn_clus
YJL168C	NP_012367	SET2	P46995	NP_012367.2 histone methyltransferase SET2 [Saccharomyces cerevisiae S288c]	2	cytosol, nucleus	C201, C68, C70, C82, C88, C97, C102, C109, C248, C250, C255	ZincNecklaces	Unknown	SET	2.1.1.43	transferase
YHR056C	NP_011923	RSC30	P38781	NP_011923.2 Rsc30p [Saccharomyces cerevisiae S288c]	2	nucleus	C15, C18, C25, C32, C35, C43	Zn2Cys6_ZnFinger	Structural	Zn_clus
YLR410W-B	NP_058174	TY2B-LR1	P0C2J3	NP_058174.3 gag-pol fusion protein [Saccharomyces cerevisiae S288c]	1	nucleus	H595, H600, C633, C636	Unknown	Structural	Integrase-type zinc finger-like	3.4.23.-, 2.7.7.49, 2.7.7.7, 3.1.26.4	hydrolase, transferase
YOR244W	NP_014887	ESA1	Q08649	NP_014887.3 NuA4 histone acetyltransferase complex catalytic subunit ESA1 [Saccharomyces cerevisiae S288c]	1	nucleus	C248, C252, H261, C275	C2H2_ZnFinger	Structural	C2HC MYST-type	2.3.1.48	transferase
YNL097C	NP_014302	PHO23	P50947	NP_014302.3 Pho23p [Saccharomyces cerevisiae S288c]	2	nucleus	C283, C285, Q287, Y290, C296, C301, H307, C310, C323, C326	TrebleClef	Structural	PHD
YIL030C	NP_012234	SSM4	P40318	NP_012234.3 E3 ubiquitin-protein ligase SSM4 [Saccharomyces cerevisiae S288c]	2	ER	C39, C42, C56, C58, H66, C69, C90, C93	TrebleClef, ZincRibbon	Structural	RINGv	2.3.2.27	transferase
YBL105C	NP_009445	PKC1	P24583	NP_009445.2 protein kinase C [Saccharomyces cerevisiae S288c]	4	cytosol, nucleus	H415, C428, C431, C442, C445, H450, C453, C461, H482, C495, C496, C498, C512, C515, H520, C523, C531	TrebleClef, Loosened_ZnRibbon	Structural	C1_1	2.7.11.13	transferase
YKL028W	NP_012897	TFA1	P36100	NP_012897.3 transcription factor TFIIE subunit TFA1 [Saccharomyces cerevisiae S288c]	1	nucleus	C124, C127, C149, C152	ZincRibbon	Structural	TF_Zn_Ribbon
YPL015C	NP_015310	HST2	P53686	NP_015310.1 histone deacetylase HST2 [Saccharomyces cerevisiae S288c]	1	cytosol, nucleus	C143, C146, C170, C173	ZincRibbon	Structural	SIR2	3.5.1.-	hydrolase
YGR184C	NP_011700	UBR1	P19812	NP_011700.1 E3 ubiquitin-protein ligase UBR1 [Saccharomyces cerevisiae S288c]	3 or 4	cytosol	C123, C136, C139, C148, C151, H157, H160, C175, C177, C189, H118	NoCluster	Structural	zf-UBR	2.3.2.27	transferase
YOR127W	NP_014770	RGA1	P39083	NP_014770.1 Rga1p [Saccharomyces cerevisiae S288c]	2	cytosol	C70, C73, C95, C98, C101, C119, C122	TrebleClef	Structural	LIM
YDR045C	NP_010330	RPC11	Q04307	NP_010330.1 DNA-directed RNA polymerase III core subunit RPC11 [Saccharomyces cerevisiae S288c]	2	nucleus	C5, C8, C26, C29, C69, C75, C100, C103	ZincRibbon	Structural	RNA_POL_M_15KD,TFIIS_C
YDR143C	NP_010427	SAN1	P22470	NP_010427.3 ubiquitin-protein ligase SAN1 [Saccharomyces cerevisiae S288c]	1 or 2	cytosol, nucleus	C257, H259, C265, C276, C279	TrebleClef, Loosened_ZnRibbon, ZincRibbon, Zn2Cys6_ZnFinger	Structural	zf-RING_2,zf-C3HC4_3,zf-C3HC4_2,Prok-RING_4,zf-RING_UBOX,zf-rbx1
YDR205W	NP_010491	MSC2	Q03455	NP_010491.4.	N/A	ER			Transport
YBR062C	NP_009618	YBR062C	P38239	NP_009618.2 hypothetical protein YBR062C [Saccharomyces cerevisiae S288c]	2	Unknown	C109, C112, C130, H132, C138, C149, C152	TrebleClef, ZincRibbon, Zn2Cys6_ZnFinger	Structural	zf-C3HC4,zf-RING_2,zf-rbx1,zf-C3HC4_2
YOR191W	NP_014834	ULS1	Q08562	NP_014834.1 translocase ULS1 [Saccharomyces cerevisiae S288c]	1 or 2	nucleus	C1330, C1333, C1353, C1356	TrebleClef	Structural	zf-RING_5	3.6.4.-	hydrolase
YGL067W	NP_011448	NPY1	P53164	NP_011448.3 NAD(+) diphosphatase [Saccharomyces cerevisiae S288c]	1	Unknown	C179-C182-C197	ZincRibbon	Structural	zf-NADH-PPase	3.6.1.22	hydrolase
YMR037C	NP_013751	MSN2	P33748	NP_013751.1 stress-responsive transcriptional activator MSN2 [Saccharomyces cerevisiae S288c]	2 or 3	cytosol, nucleus	C649, C652, K654, H665, H670, C678, C681, K683, H694, H698	C2H2_ZnFinger	Structural	zf-C2H2,zf-H2C2_2
YHR207C	NP_012077	SET5	P38890	NP_012077.1 S-adenosylmethionine-dependent methyltransferase [Saccharomyces cerevisiae S288c]	1	nucleus	C369, C424, C426, C429	ZincNecklaces	Unknown	SET	2.1.1.-	transferase
YJL056C	NP_012479	ZAP1	P47043	NP_012479.1 Zap1p [Saccharomyces cerevisiae S288c]	7	nucleus	H786, H790, C798, C801, K803, H814, H818, C826, C829, K831, H842, H846, C581, C586, H599, H604, C707, C712, H725, C745, C770, C773, C852, C855	TrebleClef, C2H2_ZnFinger	Structural	zf-C2H2,zf-H2C2_2
YGL066W	NP_011449	SGF73	P53165	NP_011449.1 deubiquitination module subunit SGF73 [Saccharomyces cerevisiae S288c]	2	cytosol, nucleus	C233, C243, C249, H252, C78, C81, H93, H97	ZincRibbon	Structural	SCA7
YER040W	NP_010958	GLN3	P18494	NP_010958.3 nitrogen-responsive transcriptional regulator GLN3 [Saccharomyces cerevisiae S288c]	1	cytosol, nucleus	C306, C309, C327, C330	TrebleClef	Structural	GATA
YLR256W	NP_013357	HAP1	P0CE41	NP_013357.1 Hap1p [Saccharomyces cerevisiae S288c]	2	mitochondrion,nucleus	C64, C67, C74, C81, C84, C93	Zn2Cys6_ZnFinger	Structural	Zn_clus
YKL059C	NP_012864	MPE1	P35728	NP_012864.1 cleavage polyadenylation factor subunit MPE1 [Saccharomyces cerevisiae S288c]	1	cytosol, nucleus	C182, C185, H190, C195	Shuffled_ZnRibbonII	Structural	zf-CCHC_2
YNL021W	NP_014377	HDA1	P53973	NP_014377.1 histone deacetylase HDA1 [Saccharomyces cerevisiae S288c]	1	nucleus	H83, H205, H206, D243, D245, H247, S266, L267, D338	ZincNecklaces, NoCluster	Catalytic	Hist_deacetyl	3.5.1.98	hydrolase
YJL110C	NP_012425	GZF3	P42944	NP_012425.1 Gzf3p [Saccharomyces cerevisiae S288c]	1	nucleus	C131, C134, C152, C155	TrebleClef	Structural	GATA
YBL104C	NP_009446	SEA4	P38164	NP_009446.2 Sea4p [Saccharomyces cerevisiae S288c]	1	vacuolar membrane	C1005, C1008, H1010, C1027	Unknown	Structural	Zn_ribbon_17
YNL077W	NP_014322	APJ1	P53940	NP_014322.1 Apj1p [Saccharomyces cerevisiae S288c]	2	nucleus	C206, C209, C220, C223, C246, C249, C262, C265	Shuffled_ZnRibbon	Structural	DnaJ_CXXCXGXG
YLR382C	NP_013486	NAM2	P11325	NP_013486.3 leucine--tRNA ligase NAM2 [Saccharomyces cerevisiae S288c]	1	mitochondrion	C462, C465, C503, C506	Unknown	Unknown	Unknown	6.1.1.4	ligase
YLR427W	NP_013531	MAG2	Q06436	NP_013531.3 Mag2p [Saccharomyces cerevisiae S288c]	2	cytosol	C195, C198, C211, H213, C216, C219, C246, C249	TrebleClef, Loosened_ZnRibbon, ZincRibbon, Zn2Cys6_ZnFinger	Structural	zf-C3HC4,zf-RING_2,zf-RING_UBOX,zf-RING_5
YLR148W	NP_013249	PEP3	P27801	NP_013249.1 tethering complex subunit PEP3 [Saccharomyces cerevisiae S288c]	2	vacuolar membrane	C826, C829, C843, H845, C846, H848, C851	Unknown	Structural	RING-type
YLR247C	NP_013348	IRC20	Q06554	NP_013348.1 E3 ubiquitin-protein ligase IRC20 [Saccharomyces cerevisiae S288c]	2	nucleus	C1239, C1242, C1254, H1256, C1259, C1262, C1273, C1276	TrebleClef, Loosened_ZnRibbon, ZincRibbon, Zn2Cys6_ZnFinger	Structural	zf-C3HC4,zf-RING_2,zf-RING_5,zf-C3HC4_3,zf-C3HC4_2,zf-RING_UBOX,zf-rbx1	3.6.1.-	hydrolase
YNL255C	NP_014144	GIS2	P53849	NP_014144.1 mRNA-binding translational activator GIS2 [Saccharomyces cerevisiae S288c]	7	cytosol	C6, C9, H14, C19, C25, C28, H33, C38, C49, C52, H57, C62, C67, C70, H75, C80, E82, C94, C97, H102, C107, C118, C121, H126, C131, C137, C140, H145, C150	Shuffled_ZnRibbonII	Structural	zf-CCHC
YMR247C	NP_013975	RKR1	Q04781	NP_013975.1 ubiquitin-protein ligase RKR1 [Saccharomyces cerevisiae S288c]	2	cytosol, nucleus	C1508, C1511, H1535, C1538, C1551, C1554, C1527, C1530	TrebleClef, ZincRibbon	Structural	zf-RING_2,FANCL_C	2.3.2.27	transferase
YGR274C	NP_011790	TAF1	P46677	NP_011790.1 Taf1p [Saccharomyces cerevisiae S288c]	1	cytosol, nucleus	C1038, C1041, H1046, C1053	Unknown	Structural	zf-CCHC_6 (Pfam)	2.3.1.48	transferase
YDR228C	NP_010514	PCF11	P39081	NP_010514.3 Pcf11p [Saccharomyces cerevisiae S288c]	1	cytosol, nucleus	C421, C424, H441, H445	Unknown	Unknown	Unknown
YOL089C	NP_014552	HAL9	Q12180	NP_014552.1 Hal9p [Saccharomyces cerevisiae S288c]	2	nucleus	C136, C139, C146, C156, C159, C166	Zn2Cys6_ZnFinger	Structural	Zn_clus
YKR029C	NP_012954	SET3	P36124	NP_012954.3 histone-binding protein SET3 [Saccharomyces cerevisiae S288c]	2	nucleus	C120, C122, D123, C134, C137, H142, C145, C160, C163	TrebleClef	Structural	PHD
YLR403W	NP_013507	SFP1	P32432	NP_013507.1 zinc-coordinating transcription factor SFP1 [Saccharomyces cerevisiae S288c]	2	cytosol, nucleus	C661, C664, H680, H683	C2H2_ZnFinger	Structural	C2H2-type, C2H2-type
YMR075W	NP_013791	RCO1	Q04779	NP_013791.1 Rco1p [Saccharomyces cerevisiae S288c]	2	nucleus	C263, C266, Q268, C275, C278, H283, C286, C303, C306, C417, C420	TrebleClef	Structural	PHD
YDR034C	NP_010317	LYS14	P40971	NP_010317.3 Lys14p [Saccharomyces cerevisiae S288c]	2	nucleus	C159, C162, C169, C176, C179, C186	Zn2Cys6_ZnFinger	Structural	Zn_clus
YJR027W	NP_012560	TY1B-JR1	P47098	NP_012560.1 gag-pol fusion protein [Saccharomyces cerevisiae S288c]	1	nucleus	H599, H604, C637, C640	Unknown	Structural	Integrase-type zinc finger-like	3.4.23.-, 2.7.7.49, 2.7.7.7, 3.1.26.4	hydrolase, transferase
YIR023W	NP_012289	DAL81	P21657	NP_012289.3 Dal81p [Saccharomyces cerevisiae S288c]	2	nucleus	C150, C153, C160, C169, C172, C179	Zn2Cys6_ZnFinger	Structural	Zn_clus
YPR176C	NP_015502	BET2	P20133	NP_015502.1 Rab geranylgeranyltransferase BET2 [Saccharomyces cerevisiae S288c]	1	cytosol	D135, D234, C236, D283, H286	NoCluster	Catalytic	Prenyltrans	2.5.1.60	transferase
YPL103C	NP_015222	FMP30	Q02883	NP_015222.1 N-acetylphosphatidylethanolamine-hydrolyzing phospholipase D [Saccharomyces cerevisiae S288c]	2	mitochondrion	H265, H267, D269, H270, H332, D364, H425	ZincNecklaces	Catalytic	Lactamase_B_2,Lactamase_B_3	3.1.4.54	hydrolase
YLL031C	NP_013069	GPI13	Q07830	NP_013069.1 mannose-ethanolamine phosphotransferase GPI13 [Saccharomyces cerevisiae S288c]	2	ER	Catalytic,Structural	HelicalAnchors	Catalytic	Phosphodiest	2.-.-.-	transferase
YLL062C	NP_013038	MHT1	Q12525	NP_013038.1 S-adenosylmethionine-homocysteine S-methyltransferase MHT1 [Saccharomyces cerevisiae S288c]	1	cytosol	C238, N265, C305, C306	NoCluster	Catalytic	S-methyl_trans	2.1.1.10	transferase
YKR087C	NP_013013	OMA1	P36163	NP_013013.2 metalloendopeptidase [Saccharomyces cerevisiae S288c]	1	mitochondrion	H203, H207, E257, H306	HelicalAnchors	Catalytic	Peptidase_M48	3.4.24.-	hydrolase
YGL248W	NP_011266	PDE1	P22434	NP_011266.1 3',5'-cyclic-nucleotide phosphodiesterase PDE1 [Saccharomyces cerevisiae S288c]	2	Unknown	H128, H130, D132, H133, H213, D244, H326	NoCluster	Catalytic	PDEase_II	3.1.4.17	hydrolase
YOR360C	NP_015005	PDE2	P06776	NP_015005.1 3',5'-cyclic-nucleotide phosphodiesterase PDE2 [Saccharomyces cerevisiae S288c]	1	cytosol, nucleus	H269, H302, D303, E332, D400	NoCluster	Catalytic	PDEase_I	3.1.4.53	hydrolase
YBR074W	NP_009630	PFF1	P38244	NP_009630.3 Pff1p [Saccharomyces cerevisiae S288c]	2	vacuolar membrane	D168, E201, H300	NoCluster	Catalytic	Peptidase_M28	3.4.-.-	hydrolase
YOL066C	NP_014575	RIB2	Q12362	NP_014575.1 bifunctional DRAP deaminase/tRNA pseudouridine synthase RIB2 [Saccharomyces cerevisiae S288c]	1	cytosol	H482, E484, C515, C525	ZincNecklaces, NoCluster	Catalytic	dCMP_cyt_deam_1	5.4.99.28, 3.5.4.26	isomerase
YLR277C	NP_013379	YSH1	Q06224	NP_013379.1 cleavage polyadenylation factor subunit YSH1 [Saccharomyces cerevisiae S288c]	2	nucleus	H68, H70, D72, H73, H163, D184, H430	ZincNecklaces	Catalytic	RMMBL,Lactamase_B_2,Lactamase_B,Lactamase_B_6	3.1.27.-	hydrolase
YOR113W	NP_014756	AZF1	P41696	NP_014756.3 Azf1p [Saccharomyces cerevisiae S288c]	4	cytosol, nucleus	H611, H615, C623, C626, K628, H639, H643, C651, C654, K656, H667, H671, C679, C684, H697, H702	C2H2_ZnFinger	Structural	zf-C2H2,zf-H2C2_2
YPL181W	NP_015144	CTI6	Q08923	NP_015144.1 Cti6p [Saccharomyces cerevisiae S288c]	2	nucleus	C75, C77, C92, C95, H100, C103, C117, C120	TrebleClef	Structural	PHD
YGR093W	NP_011607	DRN1	P53255	NP_011607.3 Drn1p [Saccharomyces cerevisiae S288c]	1	cytosol, nucleus	C269-C272-H319-H366	ZincNecklaces	Structural	CwfJ_C_1
YLR228C	NP_013329	ECM22	Q05958	NP_013329.1 Ecm22p [Saccharomyces cerevisiae S288c]	2	cytosol, nucleus	C44, C47, C54, C61, C64, C71	Zn2Cys6_ZnFinger	Structural	Zn_clus
YFL021W	NP_116632	GAT1	P43574	NP_116632.1 Gat1p [Saccharomyces cerevisiae S288c]	1	cytosol, nucleus	C310, C313, C331, C334	TrebleClef	Structural	GATA
YPR008W	NP_015333	HAA1	Q12753	NP_015333.1 Haa1p [Saccharomyces cerevisiae S288c]	1	nucleus	C11, C14, C23, H25	Zn2Cys6_ZnFinger	Structural	Copper-fist
YOL068C	NP_014573	HST1	P53685	NP_014573.1 histone deacetylase HST1 [Saccharomyces cerevisiae S288c]	1	nucleus	C318, C321, C342, C345	ZincRibbon	Structural	SIR2	3.5.1.-	hydrolase
YHR192W	NP_012062	LNP1	P38878	NP_012062.1 Lnp1p [Saccharomyces cerevisiae S288c]	1	ER	C223, C226, C244, C247	ZincRibbon	Structural	C4-type
YFL044C	NP_116610	OTU1	P43558	NP_116610.1 ubiquitin-specific protease OTU1 [Saccharomyces cerevisiae S288c]	1	cytosol, nucleus	C272, C275, H288, H294	C2H2_ZnFinger	Structural	C2H2-type	3.4.19.12	hydrolase
YKL025C	NP_012900	PAN3	P36102	NP_012900.1 Pan3p [Saccharomyces cerevisiae S288c]	1	cytosol	C14, C23, C30, H34	NoCluster	Structural	C3H1-type
YGL013C	NP_011502	PDR1	P12383	NP_011502.1 drug-responsive transcription factor PDR1 [Saccharomyces cerevisiae S288c]	2	cytosol, nucleus	C46, C49, C56, C62, C65, C72	Zn2Cys6_ZnFinger	Structural	Zn_clus
YMR231W	NP_013958	PEP5	P12868	NP_013958.1 tethering complex subunit PEP5 [Saccharomyces cerevisiae S288c]	1 or 2	vacuolar membrane	C928, C931, C944, H946, H949, C952, C969, C972	Unknown	Structural	RING-type	2.3.2.27	transferase
YGL070C	NP_011445	RPB9	P27999	NP_011445.1 DNA-directed RNA polymerase II core subunit RPB9 [Saccharomyces cerevisiae S288c]	2	nucleus	C7, R8, C10, C29, C32, C75, K77, C78, S80, C103, C106	ZincRibbon	Structural	RNA_POL_M_15KD,TFIIS_C
YER139C	NP_011066	RTR1	P40084	NP_011066.3 RNA polymerase II subunit B1 CTD phosphatase RTR1 [Saccharomyces cerevisiae S288c]	1	cytosol, nucleus	C73, C78, C112, H116	C2H2_ZnFinger	Structural	RPAP2_Rtr1	3.1.3.16	hydrolase
YPL047W	NP_015278	SGF11	Q03067	NP_015278.1 SAGA histone acetyltransferase complex subunit SGF11 [Saccharomyces cerevisiae S288c]	1	nucleus	C73, C76, H88, C92	C2H2_ZnFinger	Structural	Sgf11
YDR409W	NP_010697	SIZ1	Q04195	NP_010697.3 SUMO ligase SIZ1 [Saccharomyces cerevisiae S288c]	1	nucleus	C377, H379, C400, C403	Loosened_ZnRibbon	Structural	zf-MIZ	6.3.2.-	ligase
YLR005W	NP_013105	SSL1	Q04673	NP_013105.1 TFIIH/NER complex subunit SSL1 [Saccharomyces cerevisiae S288c]	2	nucleus	C403, C406, C429, C432, C437, D439, C440, H445, H449, C349, C352	TrebleClef	Structural	C1_4
YPL016W	NP_015309	SWI1	P09547	NP_015309.1 Swi1p [Saccharomyces cerevisiae S288c]	1	nucleus	C1241, 1247, C1254, C1258	ZincRibbon	Structural	C4-type
YOR337W	NP_014982	TEA1	P47988	NP_014982.3 Tea1p [Saccharomyces cerevisiae S288c]	2	nucleus	C70, C73, C80, C86, C89, C96	Zn2Cys6_ZnFinger	Structural	Zn_clus
YDR460W	NP_010748	TFB3	Q03290	NP_010748.3 TFIIH/NER complex subunit TFB3 [Saccharomyces cerevisiae S288c]	2	nucleus	C13, C16, C39, C42	TrebleClef	Structural	Unknown
YLR136C	NP_013237	TIS11	P47977	NP_013237.1 Tis11p [Saccharomyces cerevisiae S288c]	2	cytosol, nucleus	C175, C184, C190, H194, C213, C222, C228, H232	ZincNecklaces	Structural	zf-CCCH
YDR207C	NP_010493	UME6	P39001	NP_010493.1 DNA-binding transcriptional regulator UME6 [Saccharomyces cerevisiae S288c]	2	nucleus	C771, C774, C781, C788, C791, C798	Zn2Cys6_ZnFinger	Structural	Zn_clus
YOR004W	NP_014646	UTP23	Q12339	NP_014646.1 rRNA-binding ribosome biosynthesis protein UTP23 [Saccharomyces cerevisiae S288c]	1	mitochondrion,nucleus	C64, C89, H91, C102	NoCluster	Structural	Fcf1
YLR373C	NP_013477	VID22	Q05934	NP_013477.1 Vid22p [Saccharomyces cerevisiae S288c]	1	nucleus	C87, C90, H110, H115	Unknown	Structural	BED-type
YBL029C-A	NP_076874	YBL029C-A	Q3E756	NP_076874.1 hypothetical protein YBL029C-A [Saccharomyces cerevisiae S288c]	1	Unknown	C28-C31-C63-C66	Unknown	Structural	zinc_ribbon_15
YGL211W	NP_011304	NCS6	P53088	NP_011304.2 Ncs6p [Saccharomyces cerevisiae S288c]	1	cytosol	C308, C311, C320, C323	Unknown	Unknown	Unknown	2.7.7.-	transferase
YNL250W	NP_014149	RAD50	P12753	NP_014149.1 MRX complex DNA-binding subunit [Saccharomyces cerevisiae S288c]	1	nucleus	C687, C690	ZincRibbon	Unknown	Rad50_zn_hook	3.6.-.-	hydrolase
YNL040W	NP_014358	YNE0	P53960	NP_014358.3 putative alanine--tRNA ligase [Saccharomyces cerevisiae S288c]	1	cytosol	C240, H244	HelicalAnchors	Unknown	tRNA_SAD
YMR321C	NP_014054	YMR321C	Q04898	NP_014054.3 hypothetical protein YMR321C [Saccharomyces cerevisiae S288c]	1	Unknown	C19, N46, C86, C87	NoCluster	Catalytic	S-methyl_trans
YKL103C	NP_012819	APE1	P14904	NP_012819.1 metalloaminopeptidase APE1 [Saccharomyces cerevisiae S288c]	2	vacuole	H132, D303, E340, D385, H479	NoCluster	Catalytic	Peptidase_M18	3.4.11.22	hydrolase
YNR020C	NP_014417	ATP23	P53722	NP_014417.3 putative metalloprotease [Saccharomyces cerevisiae S288c]	1	mitochondrion	H124, H128	Unknown	Catalytic	Peptidase_M76	3.4.24.-	hydrolase
YPR122W	NP_015447	AXL1	P40851	NP_015447.1 Axl1p [Saccharomyces cerevisiae S288c]	1	cytosol	H68, H72, E149, E156	HelicalAnchors	Catalytic	Peptidase_M16	3.4.24.-	hydrolase
YOL164W	NP_014478	BDS1	Q08347	NP_014478.1 sulfuric ester hydrolase [Saccharomyces cerevisiae S288c]	1	Unknown	H162, H164, D166, H167	ZincNecklaces	Catalytic	Lactamase_B_2,Lactamase_B	3.1.6.-	hydrolase
YGL155W	NP_011360	CDC43	P18898	NP_011360.1 protein geranylgeranyltransferase type I subunit CDC43 [Saccharomyces cerevisiae S288c]	1	cytosol, nucleus	D164, D286, C288, D338, H341	NoCluster	Catalytic	Prenyltrans	2.5.1.59	transferase
YLR245C	NP_013346	CDD1	Q06549	NP_013346.1 cytidine deaminase [Saccharomyces cerevisiae S288c]	1	cytosol, nucleus	C61, C96, C99	ZincNecklaces, NoCluster	Catalytic	dCMP_cyt_deam_1	3.5.4.5	hydrolase
YIR027C	NP_012293	DAL1	P32375	NP_012293.3 allantoinase [Saccharomyces cerevisiae S288c]	2	Unknown	H70, H72, H193, H247, D323	NoCluster	Catalytic	Amidohydro_1	3.5.2.5	hydrolase
YHR144C	NP_012014	DCD1	P06773	NP_012014.1 deoxycytidine monophosphate deaminase [Saccharomyces cerevisiae S288c]	1	cytosol	H233, E235, C260, C263	ZincNecklaces, NoCluster	Catalytic	dCMP_cyt_deam_1	3.5.4.12	hydrolase
YFL061W	NP_014064	DDI2	P0CH63	NP_014064.1 cyanamide hydratase [Saccharomyces cerevisiae S288c]	1	Unknown	H55, D89	NoCluster	Catalytic	HD	4.2.1.69	lyase
YNL335W	NP_116594	DDI3	P0CH64	NP_116594.1 cyanamide hydratase [Saccharomyces cerevisiae S288c]	1	Unknown	H55, D89	NoCluster	Catalytic	HD	4.2.1.69	lyase
YGL196W	NP_011319	DSD1	P53095	NP_011319.2 D-serine ammonia-lyase DSD1 [Saccharomyces cerevisiae S288c]	1	Unknown	H398, C400	HelicalAnchors	Catalytic	D-ser_dehydrat	4.3.1.18	lyase
YOR040W	NP_014683	GLO4	Q12320	NP_014683.1 hydroxyacylglutathione hydrolase GLO4 [Saccharomyces cerevisiae S288c]	2	mitochondrion	H69, H71, D73, H74, H131, D154	ZincNecklaces	Catalytic	Lactamase_B_2,Lactamase_B	3.1.2.6	hydrolase
YMR281W	NP_014008	GPI12	P23797	NP_014008.1 N-acetylglucosaminylphosphatidylinositol deacetylase [Saccharomyces cerevisiae S288c]	1	ER	H63, D66, H176	NoCluster	Catalytic	PIG-L	3.5.1.89	hydrolase
YDL238C	NP_010043	GUD1	Q07729	NP_010043.1 guanine deaminase [Saccharomyces cerevisiae S288c]	1	cytosol	H100, H102, H258, H297, D348	NoCluster	Catalytic	Amidohydro_3,Amidohydro_1	3.5.4.3	hydrolase
YPR068C	NP_015393	HOS1	Q12214	NP_015393.1 histone deacetylase [Saccharomyces cerevisiae S288c]	1	nucleus	H42, D245, D247, H249, S268, V269, D333	ZincNecklaces, NoCluster	Catalytic	Hist_deacetyl	3.5.1.98	hydrolase
YGL194C	NP_011321	HOS2	P53096	NP_011321.1 histone deacetylase HOS2 [Saccharomyces cerevisiae S288c]	1	nucleus	H45, D192, D194, H196, S215, F216, D283	ZincNecklaces, NoCluster	Catalytic	Hist_deacetyl	3.5.1.98	hydrolase
YJL062W	NP_012473	LAS21	P40367	NP_012473.1 mannose-ethanolamine phosphotransferase LAS21 [Saccharomyces cerevisiae S288c]	1	ER	D44, T84, D259, H260	HelicalAnchors	Catalytic	Phosphodiest	2.-.-.-	transferase
YJR024C	NP_012558	MDE1	P47095	NP_012558.3 methylthioribulose 1-phosphate dehydratase MDE1 [Saccharomyces cerevisiae S288c]	1	cytosol	G37, H107, H109, H192	ZincRafts	Catalytic	Aldolase_II	4.2.1.109	lyase
YKL194C	NP_012727	MST1	P07236	NP_012727.1 threonine--tRNA ligase MST1 [Saccharomyces cerevisiae S288c]	1	mitochondrion	C133, H184, H319	ZincRafts	Catalytic	tRNA-synt_2b	6.1.1.3	ligase
YCR026C	NP_009955	NPP1	P25353	NP_009955.2 nucleotide diphosphatase/phosphodiesterase NPP1 [Saccharomyces cerevisiae S288c]	2	Unknown	D176, T219, D362, H366, D415, H416, H542	NoCluster	Catalytic	Phosphodiest	3.1.4.1, 3.6.1.9	hydrolase
YEL016C	NP_010900	NPP2	P39997	NP_010900.1 nucleotide diphosphatase/phosphodiesterase NPP2 [Saccharomyces cerevisiae S288c]	2	ER	D84, T127, D257, H261, D306, H307, H435	NoCluster	Catalytic	Phosphodiest	3.1.4.1, 3.6.1.9	hydrolase
YKL134C	NP_012788	OCT1	P35999	NP_012788.2 metalloendopeptidase [Saccharomyces cerevisiae S288c]	1	mitochondrion	H558, H562, E587	HelicalAnchors	Catalytic	Peptidase_M3	3.4.24.59	hydrolase
YNL082W	NP_014317	PMS1	P14242	NP_014317.4 ATP-binding mismatch repair protein [Saccharomyces cerevisiae S288c]	2	cytosol, nucleus	H703, E707, C817, C848, H850	NoCluster	Catalytic	MutL_C
YDL104C	NP_010179	QRI7	P43122	NP_010179.1 putative N(6)-L-threonylcarbamoyladenine synthase [Saccharomyces cerevisiae S288c]	1	mitochondrion	H145, H149, H175, D361	HelicalAnchors	Catalytic	Peptidase_M22	2.3.1.234	transferase
YDL090C	NP_010193	RAM1	P22007	NP_010193.1 protein farnesyltransferase [Saccharomyces cerevisiae S288c]	1	cytosol	D209, D307, C309, D360, H363	NoCluster	Catalytic	Prenyltrans	2.5.1.58	transferase
YDL216C	NP_010065	RRI1	Q12468	NP_010065.2 COP9 signalosome catalytic subunit RRI1 [Saccharomyces cerevisiae S288c]	1	cytosol	E120, H164, H166, D177	ZincRafts	Catalytic	JAB	3.4.-.-	hydrolase
YJR159W	NP_012693	SOR1	P35497	NP_012693.1 L-iditol 2-dehydrogenase SOR1 [Saccharomyces cerevisiae S288c]	1	Unknown	C43, S45, H68, E69	NoCluster	Catalytic	ADH_N	1.1.1.14	oxidoreductase
YDL246C	NP_010035	SOR2	Q07786	NP_010035.1 L-iditol 2-dehydrogenase SOR2 [Saccharomyces cerevisiae S288c]	1	Unknown	C43, S45, H68, E69	NoCluster	Catalytic	ADH_N	1.1.1.14	oxidoreductase
YGL243W	NP_011271	TAD1	P53065	NP_011271.1 tRNA-specific adenosine deaminase [Saccharomyces cerevisiae S288c]	1	nucleus	H101, C157, C223	ZincNecklaces	Catalytic	A_deamin	3.5.4.34	hydrolase
YJL035C	NP_012499	TAD2	P47058	NP_012499.1 tRNA(adenine34) deaminase [Saccharomyces cerevisiae S288c]	1	cytosol, nucleus	H54, E56, C88, C91	ZincNecklaces, NoCluster	Catalytic	dCMP_cyt_deam_1	3.5.4.33	hydrolase
YLR316C	NP_013420	TAD3	Q9URQ3	NP_013420.2 Tad3p [Saccharomyces cerevisiae S288c]	1	cytosol, nucleus	H216, C254, C257	ZincNecklaces, NoCluster	Catalytic	dCMP_cyt_deam_1
YJR126C	NP_012660	VPS70	P47161	NP_012660.1 putative zinc metalloprotease [Saccharomyces cerevisiae S288c]	2	ER	H445, D456, D522, H607	NoCluster	Catalytic	Peptidase_M28	3.4.-.-	hydrolase
YHR134W	NP_012002	WSS1	P38838	NP_012002.1 metalloendopeptidase WSS1 [Saccharomyces cerevisiae S288c]	1	vacuole	H115, H119, H125	Unknown	Catalytic	Unknown	3.4.24.-	hydrolase
YLR070C	NP_013171	XYL2	Q07993	NP_013171.1 D-xylulose reductase XYL2 [Saccharomyces cerevisiae S288c]	1	Unknown	C44, S46, H69, E70	NoCluster	Catalytic	ADH_N	1.1.1.9	oxidoreductase
YBR242W	NP_009801	YBR242W	P38331	NP_009801.1 hypothetical protein YBR242W [Saccharomyces cerevisiae S288c]	1	cytosol, nucleus	H80, D109	NoCluster	Catalytic	HD
YDR415C	NP_010703	YDR415C	Q04033	NP_010703.1 putative aminopeptidase [Saccharomyces cerevisiae S288c]	2	vacuole	H177, D196, E234, E235, D262, C311, H340	NoCluster	Catalytic	Peptidase_M28	3.4.11.-	hydrolase
YFR018C	NP_116673	YFI8	P43599	NP_116673.1 hypothetical protein YFR018C [Saccharomyces cerevisiae S288c]	2	ER	H126, D141, E192, E193, D230, H329	NoCluster	Catalytic	Peptidase_M28
YJL213W	NP_012322	YJL213W	P40896	NP_012322.1 hypothetical protein YJL213W [Saccharomyces cerevisiae S288c]	1	cytosol	H154, H174, D246	NoCluster	Catalytic	Amidohydro_3,Amidohydro_1
YMR303C	NP_014032	ADH2	P00331	NP_014032.1 alcohol dehydrogenase ADH2 [Saccharomyces cerevisiae S288c]	2	cytosol	C44, H67, E68, C98, C101, C104, C112	ZincNecklaces, NoCluster	Catalytic,Structural	ADH_N	1.1.1.1	oxidoreductase
YCR105W	NP_010030	ADH7	P25377	NP_010030.1 NADP-dependent alcohol dehydrogenase [Saccharomyces cerevisiae S288c]	2	Unknown	C46, S48, H68, E69, C100, C103, C106, C114	ZincNecklaces, NoCluster	Catalytic,Structural	ADH_N	1.1.1.2	oxidoreductase
YAL061W	NP_009340	BDH2	P39713	NP_009340.1 putative dehydrogenase BDH2 [Saccharomyces cerevisiae S288c]	2	cytosol, nucleus	C39, H73, E74, C103, C120, C123, C131	ZincNecklaces, NoCluster	Catalytic,Structural	ADH_N	1.1.1.303	oxidoreductase
YOR031W	NC_001147.6	CRS5	P41902	Saccharomyces cerevisiae Metallothionein (MT)	6 or 7	Unknown	Unknown	Unknown	Storage	Metallothi_Euk2﻿
YLR131C	NP_013232	ACE2	P21192	NP_013232.1 DNA-binding transcription factor ACE2 [Saccharomyces cerevisiae S288c]	from 1 to 3	cytosol, nucleus	C605, C610, H623, H627	C2H2_ZnFinger	Structural	Unknown
YPL202C	NP_015122	AFT2	Q08957	NP_015122.1 Aft2p [Saccharomyces cerevisiae S288c]	1	nucleus	C86, C109, H133, H135	NoCluster	Structural	AFT
YDR524C	NP_010812	AGE1	Q04412	NP_010812.3 Age1p [Saccharomyces cerevisiae S288c]	1	endosome	C186, C189, C207, C210	TrebleClef	Structural	ArfGap
YDL175C	NP_010106	AIR2	Q12476	NP_010106.1 TRAMP complex RNA-binding subunit [Saccharomyces cerevisiae S288c]	3	nucleus	C63, C66, H71, C76, C164, C167, H172, C177, E179, C81, C84, H90, C95, C123, C126, H131, C136	Shuffled_ZnRibbonII	Structural	zf-CCHC
YDL008W	NP_010276	APC11	Q12157	NP_010276.3 anaphase promoting complex subunit 11 [Saccharomyces cerevisiae S288c]	3	vacuolar membrane	C41, C44, C52, C55, C62, C69, H71, H74, H76, C77, C91, C94	TrebleClef, ZincRibbon, Zn2Cys6_ZnFinger	Structural	zf-ANAPC11,zf-rbx1	6.3.2.-	ligase
YBL019W	NP_009534	APN2	P38207	NP_009534.1 DNA-(apurinic or apyrimidinic site) lyase APN2 [Saccharomyces cerevisiae S288c]	1	nucleus	C476, H478, C500, C514	Unknown	Structural	zf-GRF (Pfam)	4.2.99.18	lyase
YML099C	NP_013610	ARG81	P05085	NP_013610.1 Arg81p [Saccharomyces cerevisiae S288c]	2	nucleus	C21, C24, C31, C38, C41, C48	Zn2Cys6_ZnFinger	Structural	Zn_clus
YDR421W	NP_010709	ARO80	Q04052	NP_010709.1 Aro80p [Saccharomyces cerevisiae S288c]	2	nucleus	C25, C28, C35, C48, C51, C58	Zn2Cys6_ZnFinger	Structural	Zn_clus
YLR242C	NP_013343	ARV1	Q06541	NP_013343.1 sterol homeostasis protein ARV1 [Saccharomyces cerevisiae S288c]	1	ER, Golgi	C3-C6-C27-C30	Unknown	Structural	Arv1
YKL185W	NP_012736	ASH1	P34233	NP_012736.1 DNA-binding transcription repressor ASH1 [Saccharomyces cerevisiae S288c]	1	nucleus	C499, C502, C523, C526	TrebleClef	Structural	GATA
YMR119W	NP_013837	ASI1	P54074	NP_013837.1 putative ubiquitin-protein ligase ASI1 [Saccharomyces cerevisiae S288c]	2	nucleus	C568, C571, C583, C589, C592, C604, C607	TrebleClef, Loosened_ZnRibbon, ZincRibbon	Structural	zf-C3HC4_3
YNL008C	NP_014390	ASI3	P53983	NP_014390.2 putative ubiquitin-protein ligase ASI3 [Saccharomyces cerevisiae S288c]	2	nucleus	C624, C627, C639, C645, C648, C660, C663	TrebleClef, Loosened_ZnRibbon, ZincRibbon	Structural	zf-C3HC4_3
YPR093C	NP_015418	ASR1	Q06834	NP_015418.2 ubiquitin-protein ligase ASR1 [Saccharomyces cerevisiae S288c]	4	cytosol, nucleus	C4, C7, C23, H25, H28, C31, C44, C47	TrebleClef, ZincRibbon, Zn2Cys6_ZnFinger	Structural	zf-C3HC4,zf-RING_2,zf-RING_11,zf-rbx1
YHR171W	NP_012041	ATG7	P38862	NP_012041.1 Atg7p [Saccharomyces cerevisiae S288c]	1	cytosol	C485, C488, C569	TrebleClef	Structural	ThiF
YHR040W	NP_011906	BCD1	P38772	NP_011906.1 Bcd1p [Saccharomyces cerevisiae S288c]	1 or 2	cytosol, nucleus	C5, C8, C17, C20, C25, C29	C2H2_ZnFinger	Structural	zf-HIT
YJR089W	NP_012622	BIR1	P47134	NP_012622.3 Bir1p [Saccharomyces cerevisiae S288c]	1	cytosol, nucleus	C208, C211, H228, C237	C2H2_ZnFinger	Structural	BIR
YKL005C	NP_012921	BYE1	P36106	NP_012921.3 Bye1p [Saccharomyces cerevisiae S288c]	2	nucleus	C75, C77, C97, G99, C100, D101, H105, C108, C128, C131	TrebleClef	Structural	PHD
YMR280C	NP_014007	CAT8	P39113	NP_014007.1 DNA-binding transcription factor CAT8 [Saccharomyces cerevisiae S288c]	2	nucleus	C70, C73, C80, C87, C90, C97	Zn2Cys6_ZnFinger	Structural	Zn_clus
YMR168C	NP_013891	CEP3	P40969	NP_013891.1 Cep3p [Saccharomyces cerevisiae S288c]	2	nucleus	C14, C17, C24, C30, C33, C42	Zn2Cys6_ZnFinger	Structural	Zn_clus
YLR098C	NP_013199	CHA4	P43634	NP_013199.1 Cha4p [Saccharomyces cerevisiae S288c]	2	nucleus	C44, C47, C54, C60, C63, C70	Zn2Cys6_ZnFinger	Structural	Zn_clus
YPR013C	NP_015338	CMR3	Q12145	NP_015338.1 Cmr3p [Saccharomyces cerevisiae S288c]	2	Unknown	C256, C259, H272, H276, C284, C289, H302, H306, E307	C2H2_ZnFinger	Structural	Unknown
YER130C	NP_011056	COM2	P39959	NP_011056.1 Com2p [Saccharomyces cerevisiae S288c]	2	Unknown	C391, C394, H407, H412, C420, C423, K425, H436, H440	ZincRibbon, C2H2_ZnFinger	Structural	zf-C2H2,zf-C2H2_4
YLR394W	NP_013498	CST9	Q06032	NP_013498.3 SUMO ligase CST9 [Saccharomyces cerevisiae S288c]	1	nucleus	C72, H74, C88, C91	TrebleClef	Structural	zf-RING_5
YDR151C	NP_010435	CTH1	P47976	NP_010435.1 putative mRNA-binding protein CTH1 [Saccharomyces cerevisiae S288c]	2	nucleus	C210, C219, C225, H229, C248, C257, C263, H267	ZincNecklaces	Structural	zf-CCCH
YGL166W	NP_011349	CUP2	P15315	NP_011349.3 Cup2p [Saccharomyces cerevisiae S288c]	1	nucleus	C11, C14, C23, H25	Zn2Cys6_ZnFinger	Structural	Copper-fist
YNL155W	NP_014244	CUZ1	P53899	NP_014244.1 Cuz1p [Saccharomyces cerevisiae S288c]	2	cytosol, nucleus	C18, C21, C31, C34, C39, H42, H48, C50	TrebleClef	Structural	zf-AN1
YLR323C	NP_013427	CWC24	P53769	NP_013427.1 U2-type spliceosomal complex subunit CWC24 [Saccharomyces cerevisiae S288c]	3	nucleus	C144, C153, C159, H163, C199, C202, C214, H216, C219, C222, C233, C236	TrebleClef, ZincNecklaces, Loosened_ZnRibbon, ZincRibbon, Zn2Cys6_ZnFinger	Structural	zf-C3HC4,zf-RING_5,zf-C3HC4_3,Prok-RING_4,zf-C3HC4_2,zf-RING_UBOX,zf-CCCH
YKR034W	NP_012959	DAL80	P26343	NP_012959.1 Dal80p [Saccharomyces cerevisiae S288c]	1	nucleus	C31, C34, C52, C55	TrebleClef	Structural	GATA
YDR052C	NP_010337	DBF4	P32325	NP_010337.3 protein serine/threonine kinase activating protein DBF4 [Saccharomyces cerevisiae S288c]	1	cytosol, nucleus	C661, C664, H674, H680	C2H2_ZnFinger	Structural	zf-DBF
YHR115C	NP_011983	DMA1	P38823	NP_011983.1 ubiquitin-conjugating protein DMA1 [Saccharomyces cerevisiae S288c]	2	cytosol	C327, C330, C345, H347, H350, C353, C367, C370	TrebleClef, ZincRibbon	Structural	zf-RING_2,zf-RING_11	2.3.2.27	transferase
YDR069C	NP_010354	DOA4	P32571	NP_010354.3 ubiquitin-specific protease DOA4 [Saccharomyces cerevisiae S288c]	1	cytosol	C732-C735-C784-C787	ZincRibbon	Structural	UCH_1,Rhodanese	3.4.19.12	hydrolase
YPR017C	NP_015342	DSS4	P32601	NP_015342.1 guanine nucleotide exchange factor DSS4 [Saccharomyces cerevisiae S288c]	1	cytosol	C104, C107	ZincRibbon	Structural	Mss4
YPL021W	NP_015304	ECM23	Q02710	NP_015304.1 Ecm23p [Saccharomyces cerevisiae S288c]	1	Unknown	C132, C135, C154, C157	TrebleClef	Structural	GATA
YMR176W	NP_013901	ECM5	Q03214	NP_013901.1 Ecm5p [Saccharomyces cerevisiae S288c]	2	cytosol, nucleus	C1241, C1243, C1255, C1258, H1263, C1266, C1284, C1287	TrebleClef	Structural	PHD
YFR027W	NP_116683	ECO1	P43605	NP_116683.1 Eco1p [Saccharomyces cerevisiae S288c]	1	nucleus	C35, C38, H53, H57	Unknown	Structural	zf-C2H2_3	2.3.1.-	transferase
YBR033W	NP_009589	EDS1	P38073	NP_009589.1 Eds1p [Saccharomyces cerevisiae S288c]	2	Unknown	C56, C59, C66, C75, C78, C85	Zn2Cys6_ZnFinger	Structural	Zn_clus
YGR071C	NP_011585	ENV11	P53246	NP_011585.3 Env11p [Saccharomyces cerevisiae S288c]	1	nucleus	C105, C108, H126, H131	C2H2_ZnFinger	Structural	zf-BED
YBR239C	NP_009798	ERT1	P38140	NP_009798.3 Ert1p [Saccharomyces cerevisiae S288c]	2	cytosol, nucleus	C40, C43, C50, C56, C59, C68	Zn2Cys6_ZnFinger	Structural	Zn_clus
YHL010C	NP_011853	ETP1	P38748	NP_011853.1 Etp1p [Saccharomyces cerevisiae S288c]	4	Unknown	C240, C243, C259, H261, H264, C265, C267, C276, C279, C301, C304, C313, C316, C321, H328, H332, H338	TrebleClef, Zn2Cys6_ZnFinger, Loosened_ZnRibbon, ZincRibbon, C2H2_ZnFinger	Structural	zf-C3HC4,zf-RING_2,zf-UBP,zf-RING_5,zf-C3HC4_3,zf-C3HC4_2,zf-RING_UBOX,zf-rbx1,zf-RING_11
YFR019W	NP_116674	FAB1	P34756	NP_116674.2 1-phosphatidylinositol-3-phosphate 5-kinase [Saccharomyces cerevisiae S288c]	2	vacuolar membrane	C246, C249, C262, C265, C270, C273, C291, C294	TrebleClef	Structural	FYVE	2.7.1.150	transferase
YNL023C	NP_014375	FAP1	P53971	NP_014375.1 Fap1p [Saccharomyces cerevisiae S288c]	12	cytosol	C68, C71, C79, C84, C87, C95, C114, C117, C159, H161, C163, C167, H168, H172, C175, C216, H219, C221, C225, H226, C230, C233, C362, H365, C367, C371, H372, C376, C380, C468, H471, C473, C477, H478, C482, C485, C586, H588, C590, C594, H595, C600, C604	Unknown	Structural	RING-type, NF-X1-type, NF-X1-type, NF-X1-type, NF-X1-type, NF-X1-type
YJL157C	NP_012378	FAR1	P21268	NP_012378.1 cyclin-dependent protein serine/threonine kinase inhibiting protein FAR1 [Saccharomyces cerevisiae S288c]	2	cytosol, nucleus	C202, C205, C223, H225, H228, C231, C248, C251	Unknown	Structural	RING-type
YDR339C	NP_010626	FCF1	Q05498	NP_010626.1 rRNA-processing protein FCF1 [Saccharomyces cerevisiae S288c]	1	nucleus	C101, C130, H132, C140	NoCluster	Structural	Fcf1
YDR110W	NP_010395	FOB1	O13329	NP_010395.1 replication fork barrier binding protein FOB1 [Saccharomyces cerevisiae S288c]	1	nucleus	H159, H164, C193, C196	C2H2_ZnFinger	Structural	C2H2-type
YGL254W	NP_011260	FZF1	P32805	NP_011260.1 Fzf1p [Saccharomyces cerevisiae S288c]	5	nucleus	C14, C19, K21, H32, H36, C44, C49, H62, H66, C74, C77, H90, H94	C2H2_ZnFinger	Structural	zf-C2H2
YPL248C	NP_015076	GAL4	P04386	NP_015076.1 galactose-responsive transcription factor GAL4 [Saccharomyces cerevisiae S288c]	2	nucleus	C11, C14, C21, C28, C31, C38	Zn2Cys6_ZnFinger	Structural	Zn_clus
YBR018C	NP_009574	GAL7	P08431	NP_009574.1 UDP-glucose:hexose-1-phosphate uridylyltransferase [Saccharomyces cerevisiae S288c]	1	cytosol	C54, C57, H124, H180	ZincNecklaces	Structural	GalP_UDP_transf	2.7.7.12	transferase
YMR136W	NP_013856	GAT2	P40209	NP_013856.1 Gat2p [Saccharomyces cerevisiae S288c]	1	nucleus	C472, C475, C494, C497	TrebleClef	Structural	GATA
YLR013W	NP_013113	GAT3	Q07928	NP_013113.1 Gat3p [Saccharomyces cerevisiae S288c]	1	nucleus	C72, C75, C95, C98	TrebleClef	Structural	GATA
YIR013C	NP_012278	GAT4	P40569	NP_012278.3 Gat4p [Saccharomyces cerevisiae S288c]	1	nucleus	C53, C56, C76, C79	TrebleClef	Structural	GATA
YJL103C	NP_012432	GSM1	P42950	NP_012432.1 Gsm1p [Saccharomyces cerevisiae S288c]	2	nucleus	C20, C23, C30, C36, C39, C48	Zn2Cys6_ZnFinger	Structural	Zn_clus
YKR017C	NP_012942	HEL1	P36113	NP_012942.3 E3 ubiquitin-protein ligase HEL1 [Saccharomyces cerevisiae S288c]	4	Unknown	C179, C182, C195, H197, C200, C203, C220, C223, C263, C268, C294, C301, C304, H309, C314, C341, C344, H356, C359, C362, C367, C370, H377	TrebleClef, ZincRibbon, Zn2Cys6_ZnFinger	Structural	zf-C3HC4,IBR	2.3.2.-	transferase
YGL251C	NP_011263	HFM1	P51979	NP_011263.2 Hfm1p [Saccharomyces cerevisiae S288c]	1	nucleus	C1039, C1043, C1049, C1054	ZincRibbon	Structural	C4-type	3.6.4.12	hydrolase
YJR055W	NP_012589	HIT1	P46973	NP_012589.1 Hit1p [Saccharomyces cerevisiae S288c]	1 or 2	cytosol, nucleus	C8, C11, C20, C23, C28, C32	C2H2_ZnFinger	Structural	zf-HIT
YOR258W	NP_014901	HNT3	Q08702	NP_014901.1 DNA 5'-adenosine monophosphate hydrolase [Saccharomyces cerevisiae S288c]	1	cytosol, nucleus	C188, C191, H205, E209	C2H2_ZnFinger	Structural	zf-C2HE	3.-.-.-	hydrolase
YDL227C	NP_010054	HO	P09932	NP_010054.1 Hop [Saccharomyces cerevisiae S288c]	3	nucleus	C466, C470, C486, C489, C508, C511, C522, C525, C558, C561, H574, C577	Unknown	Structural	Unknown
YIL072W	NP_012193	HOP1	P20050	NP_012193.3 Hop1p [Saccharomyces cerevisiae S288c]	1	nucleus	C3548, C351, H336, C359	Unknown	Structural	Zinc-finger
YKL084W	NP_012839	HOT13	P36078	NP_012839.1 Hot13p [Saccharomyces cerevisiae S288c]	3	mitochondrion	C17, H19, C33, C34, C40, C43, H44, H50, H64, C71, C89, C92, C68	TrebleClef, C2H2_ZnFinger	Structural	zf-CHY
YOL013C	NP_014630	HRD1	Q08109	NP_014630.1 E3 ubiquitin-protein ligase HRD1 [Saccharomyces cerevisiae S288c]	2	ER	C349, C352, C377, H379, H382, C385, C396, C399, D405	TrebleClef, Loosened_ZnRibbon, ZincRibbon, Zn2Cys6_ZnFinger	Structural	zf-C3HC4,zf-RING_2,zf-RING_5,zf-C3HC4_3,Prok-RING_4,zf-RING_UBOX,zf-rbx1	2.3.2.27	transferase
YOL133W	NP_014508	HRT1	Q08273	NP_014508.1 SCF ubiquitin ligase complex subunit HRT1 [Saccharomyces cerevisiae S288c]	3	cytosol, nucleus	C55, C58, C66, C69, C81, C88, H90, H93, H95, C96, C107, D110	TrebleClef, ZincRibbon, Zn2Cys6_ZnFinger	Structural	zf-ANAPC11,zf-rbx1
YOR025W	NP_014668	HST3	P53687	NP_014668.1 NAD-dependent histone deacetylase HST3 [Saccharomyces cerevisiae S288c]	1	nucleus	C195, C198, C220, C223	ZincRibbon	Structural	SIR2	3.5.1.-	hydrolase
YDR191W	NP_010477	HST4	P53688	NP_010477.3 NAD-dependent histone deacetylase HST4 [Saccharomyces cerevisiae S288c]	1	cytosol, nucleus	C221, C224, C251, C254	ZincRibbon	Structural	SIR2	3.5.1.-	hydrolase
YPL040C	NP_015285	ISM1	P48526	NP_015285.1 isoleucine--tRNA ligase ISM1 [Saccharomyces cerevisiae S288c]	1	mitochondrion	C975, C978, C990, C993	TrebleClef	Structural	Unknown	6.1.1.5	ligase
YML068W	NP_013643	ITT1	Q04638	NP_013643.1 Itt1p [Saccharomyces cerevisiae S288c]	4	Unknown	C297, C300, C316, C319, C324, C327, H332, C338, C402, C405, C420, C423, G424, C428, C431	TrebleClef	Structural	IBR	2.3.2.-	transferase
YJR119C	NP_012653	JHD2	P47156	NP_012653.1 histone demethylase [Saccharomyces cerevisiae S288c]	2	cytosol, nucleus	C238, C241, C253, C256, D257, H261, C264, C279, C282, C630, C633	TrebleClef	Structural	PHD	1.14.11.-	oxidoreductase
YNL227C	NP_014172	JJJ1	P53863	NP_014172.1 Jjj1p [Saccharomyces cerevisiae S288c]	1	nucleus	C340, C343, H356, H362	C2H2_ZnFinger	Structural	zf-C2H2_jaz,zf-met
YJR097W	NP_012631	JJJ3	P47138	NP_012631.3 Jjj3p [Saccharomyces cerevisiae S288c]	1	cytosol, nucleus	C113, C116, C152, C155	ZincRibbon	Structural	zf-CSL
YBL071W-A	NP_660100	KTI11	Q3E840	NP_660100.1 Kti11p [Saccharomyces cerevisiae S288c]	1	cytosol, nucleus	C25, C27, C47, C50	ZincRibbon	Structural	zf-CSL
YPL054W	NP_015271	LEE1	Q02799	NP_015271.1 Lee1p [Saccharomyces cerevisiae S288c]	2	Unknown	C93, C101, C107, H111, C124, C132, C138, H142	ZincNecklaces	Structural	Torus,zf-CCCH
YLR451W	NP_013556	LEU3	P08638	NP_013556.3 leucine-responsive transcriptional regulator LEU3 [Saccharomyces cerevisiae S288c]	2	nucleus	C37, C40, C47, C57, C60, C67	Zn2Cys6_ZnFinger	Structural	Zn_clus
YDL240W	NP_010041	LRG1	P35688	NP_010041.2 Lrg1p [Saccharomyces cerevisiae S288c]	4	cytosol	C28, C31, H54, C57, C60, C63, C86, D89, C419, C422, H439, C442, C445, C448, C471, H473, C474	TrebleClef	Structural	LIM
YDL087C	NP_010196	LUC7	Q07508	NP_010196.1 Luc7p [Saccharomyces cerevisiae S288c]	2	cytosol, nucleus	C45, C53, C68, H72, C201, C204, H220, H226	Unknown	Structural	LUC7 (Pfam)
YMR021C	NP_013734	MAC1	P35192	NP_013734.1 Mac1p [Saccharomyces cerevisiae S288c]	1	nucleus	C11, C14, C23, H25	Zn2Cys6_ZnFinger	Structural	Copper-fist
YGR288W	NP_011804	MAL13	P53338	NP_011804.1 transcription factor MAL13 [Saccharomyces cerevisiae S288c]	2	nucleus	C13, C16, C23, C29, C32, C39	Zn2Cys6_ZnFinger	Structural	Zn_clus
YBR297W	NP_009856	MAL33	P38157	NP_009856.3 transcription factor MAL33 [Saccharomyces cerevisiae S288c]	2	nucleus	C8, C11, C18, C24, C27, C34	Zn2Cys6_ZnFinger	Structural	Zn_clus
YIL150C	NP_012116	MCM10	P32354	NP_012116.1 Mcm10p [Saccharomyces cerevisiae S288c]	1	nucleus	C309, C320, C332, H335	ZincRibbon	Structural	zf-primase
YPL038W	NP_015287	MET31	Q03081	NP_015287.1 Met31p [Saccharomyces cerevisiae S288c]	1	cytosol, nucleus	C97, C100, H113, H117	C2H2_ZnFinger	Structural	Unknown
YDR253C	NP_010539	MET32	Q12041	NP_010539.1 Met32p [Saccharomyces cerevisiae S288c]	2	cytosol, nucleus	C100, C103, H116, H120, C128, C131	TrebleClef, C2H2_ZnFinger	Structural	zf-C2H2
YGL209W	NP_011306	MIG2	P53035	NP_011306.1 Mig2p [Saccharomyces cerevisiae S288c]	2	mitochrondrion, nucleus	H35, H39, C47, C52, K54, H65, H69	C2H2_ZnFinger	Structural	zf-C2H2,zf-H2C2_2
YER028C	NP_010945	MIG3	P39943	NP_010945.1 Mig3p [Saccharomyces cerevisiae S288c]	2	nucleus	C47, C52, K54, H65, H69, C19, C22, H35, H39	C2H2_ZnFinger	Structural	zf-C2H2
YEL019C	NP_010896	MMS21	P38632	NP_010896.3 SUMO ligase MMS21 [Saccharomyces cerevisiae S288c]	1	nucleus	C200, H202, C221, C226	Loosened_ZnRibbon	Structural	zf-Nse	6.3.2.-	ligase
YDR128W	NP_010413	MTC5	Q03897	NP_010413.3 Mtc5p [Saccharomyces cerevisiae S288c]	2	vacuolar membrane	C1098, C1101, C1112, C1115, H1117, H1120, C1123, C1134	Unknown	Structural	Zn_ribbon_17
YMR100W	NP_013818	MUB1	Q03162	NP_013818.1 Mub1p [Saccharomyces cerevisiae S288c]	2	nucleus	C530, C533, H551, C555, C406, C517, C539, C543	C2H2_ZnFinger	Structural	zf-MYND
YOR156C	NP_014799	NFI1	Q12216	NP_014799.1 SUMO ligase NFI1 [Saccharomyces cerevisiae S288c]	1	nucleus	C354, H356, C377, C380	Loosened_ZnRibbon	Structural	zf-MIZ,zf-Nse	6.3.2.-	ligase
YDR043C	NP_010328	NRG1	Q03125	NP_010328.3 transcriptional regulator NRG1 [Saccharomyces cerevisiae S288c]	2	nucleus	C176, C179, H192, H196, C209, H222, H226	C2H2_ZnFinger	Structural	Unknown
YBR066C	NP_009622	NRG2	P38082	NP_009622.1 Nrg2p [Saccharomyces cerevisiae S288c]	2	nucleus	C20, C28, C155, C158, H171, H175	C2H2_ZnFinger	Structural	Unknown
YLR007W	NP_013107	NSE1	Q07913	NP_013107.1 Smc5-Smc6 complex subunit NSE1 [Saccharomyces cerevisiae S288c]	2	nucleus	C271, C274, C284, C289, H306, C309, C321, C324	C2H2_ZnFinger	Structural	zf-RING-like
YPR031W	NP_015356	NTO1	Q12311	NP_015356.1 Nto1p [Saccharomyces cerevisiae S288c]	5	nucleus	C266, C269, C283, G285, C286, D287, H291, C294, C307, C310, C320, C323, H340, C343, C376, C379, C389, C394, T396, H399, C402, C435, H438	TrebleClef	Structural	zf-HC5HC2H,zf-HC5HC2H_2,PHD_2,PHD
YAL051W	NP_009349	OAF1	P39720	NP_009349.3 oleate-activated transcription factor OAF1 [Saccharomyces cerevisiae S288c]	2	cytosol, nucleus	C66, C69, C76, C83, C86, C93	Zn2Cys6_ZnFinger	Structural	Zn_clus
YKR064W	NP_012990	OAF3	P36023	NP_012990.1 Oaf3p [Saccharomyces cerevisiae S288c]	2	cytosol, nucleus	C19, C22, C29, C35, C38, C47	Zn2Cys6_ZnFinger	Structural	Zn_clus
YGL094C	NP_011421	PAN2	P53010	NP_011421.1 poly(A)-specific ribonuclease [Saccharomyces cerevisiae S288c]	1	cytosol	C658-C660-C713-C716	ZincRibbon	Structural	UCH_1	3.1.13.4	hydrolase
YBL005W	NP_009548	PDR3	P33200	NP_009548.1 drug-responsive transcription factor PDR3 [Saccharomyces cerevisiae S288c]	2	nucleus	C15, C18, C25, C31, C34, C41	Zn2Cys6_ZnFinger	Structural	Zn_clus
YLR266C	NP_013368	PDR8	Q06149	NP_013368.1 Pdr8p [Saccharomyces cerevisiae S288c]	2	nucleus	C31, C34, C41, C48, C51, C59	Zn2Cys6_ZnFinger	Structural	Zn_clus
YDR323C	NP_010610	PEP7	P32609	NP_010610.3 Pep7p [Saccharomyces cerevisiae S288c]	3	cytosol, nucleus	C221, C224, C237, C240, C245, C252, C289, C292	TrebleClef	Structural	FYVE
YDR265W	NP_010551	PEX10	Q05568	NP_010551.1 ubiquitin-protein ligase peroxin 10 [Saccharomyces cerevisiae S288c]	2	peroxisome	C286, C289, C298, C301, H303, C306, C309, C320, C323	TrebleClef, Loosened_ZnRibbon, ZincRibbon, Zn2Cys6_ZnFinger	Structural	zf-C3HC4,zf-RING_2,zf-C3HC4_3,Prok-RING_4,zf-C3HC4_2
YMR026C	NP_013739	PEX12	Q04370	NP_013739.1 ubiquitin-protein ligase peroxin 12 [Saccharomyces cerevisiae S288c]	1	peroxisome	C334, C337, C354, C357	TrebleClef, Loosened_ZnRibbon, ZincRibbon	Structural	zf-C3HC4_3
YJL210W	NP_012325	PEX2	P32800	NP_012325.1 ubiquitin-protein ligase peroxin 2 [Saccharomyces cerevisiae S288c]	2	peroxisome	C222, C225, C237, C243, C246, C256, C259	Unknown	Structural	RING-type
YDR313C	NP_010599	PIB1	Q06651	NP_010599.1 phosphatidylinositol-3-phosphate-binding ubiquitin-protein ligase [Saccharomyces cerevisiae S288c]	4	vacuolar membrane	C23, C26, H37, C39, C41, C42, C47, C50, C80, C83, C154, C157, H173, C177, C225, C228, H248, C251	TrebleClef, ZincRibbon	Structural	RNF220,zf-RING_2,zf-RING_11,FYVE,zf-RING_UBOX	2.3.2.27	transferase
YOR363C	NP_015008	PIP2	P52960	NP_015008.3 oleate-activated transcription factor PIP2 [Saccharomyces cerevisiae S288c]	2	cytosol, nucleus	C25, C28, C35, C42, C45, C52	Zn2Cys6_ZnFinger	Structural	Zn_clus
YML107C	NP_013600	PML39	Q03760	NP_013600.2 Pml39p [Saccharomyces cerevisiae S288c]	1	nucleus	C268, C271, H288, C292	Unknown	Structural	zf-C3HC (Pfam)
YDL102W	NP_010181	POL3	P15436	NP_010181.2 DNA-directed DNA polymerase delta POL3 [Saccharomyces cerevisiae S288c]	1	nucleus	C1009, C1012, C1024, C1027	Unknown	Structural	zf-C4pol (Pfam)	2.7.7.7	transferase
YLR014C	NP_013114	PPR1	P07272	NP_013114.1 Ppr1p [Saccharomyces cerevisiae S288c]	2	nucleus	C34, C37, C44, C51, C54, C61	Zn2Cys6_ZnFinger	Structural	Zn_clus
YDL043C	NP_010241	PRP11	Q07350	NP_010241.1 Prp11p [Saccharomyces cerevisiae S288c]	1	nucleus	C68, C71, H84, H90	C2H2_ZnFinger	Structural	zf-met
YDL030W	NP_010254	PRP9	P19736	NP_010254.1 SF3a splicing factor complex subunit PRP9 [Saccharomyces cerevisiae S288c]	2	nucleus	C282, C285, H298, H304	C2H2_ZnFinger	Structural	zf-C2H2_jaz
YOL054W	NP_014587	PSH1	Q12161	NP_014587.1 ubiquitin-protein ligase PSH1 [Saccharomyces cerevisiae S288c]	2	nucleus	C30, C33, C45, H47, C50, C53, C68, C71, S73, C150, C153, C168, C171, D258	TrebleClef, Loosened_ZnRibbon, ZincRibbon, Zn2Cys6_ZnFinger	Structural	zf-C3HC4,zf-RING_2,zf-RING_5,zf-C3HC4_4,zf-C3HC4_3,zf-C3HC4_2,Prok-RING_4,zf-RING_UBOX
YMR137C	NP_013857	PSO2	P30620	NP_013857.1 Pso2p [Saccharomyces cerevisiae S288c]	1	nucleus	C147, C150, C166, C169	Unknown	Structural	Zinc-finger	3.1.-.-	hydrolase
YKL015W	NP_012910	PUT3	P25502	NP_012910.1 Put3p [Saccharomyces cerevisiae S288c]	2	nucleus	C34, C37, C44, C50, C53, C60	Zn2Cys6_ZnFinger	Structural	Zn_clus
YKR090W	NP_013016	PXL1	P36166	NP_013016.4 Pxl1p [Saccharomyces cerevisiae S288c]	4	cytosol	C556, C559, H581, C584, C587, C590, C609, H612, C621, C624, H642, C645, C648, C651, C669, H672	TrebleClef	Structural	LIM
YPR186C	NP_015512	PZF1	P39933	NP_015512.1 Pzf1p [Saccharomyces cerevisiae S288c]	9	nucleus	H98, H102, C110, C113, C165, C168, H181, H185, H186, C82, C85, H126	ZincRibbon, C2H2_ZnFinger	Structural	zf-C2H2_4,zf-H2C2_2
YBR114W	NP_009672	RAD16	P31244	NP_009672.1 DNA repair protein RAD16 [Saccharomyces cerevisiae S288c]	2	nucleus	C537, C540, C552, H554, C557, C560, C577, C580	TrebleClef, ZincRibbon, Zn2Cys6_ZnFinger	Structural	zf-C3HC4	3.6.4.-	hydrolase
YCR066W	NP_009992	RAD18	P10862	NP_009992.1 E3 ubiquitin-protein ligase RAD18 [Saccharomyces cerevisiae S288c]	2	nucleus	C28, C31, C43, H45, C48, C51, C62, C65, C190, C193	TrebleClef, Loosened_ZnRibbon, ZincRibbon, Zn2Cys6_ZnFinger	Structural	zf-C3HC4,zf-RING_2,zf-RING_6,zf-RING_5,zf-C3HC4_4,zf-C3HC4_3,zf-C3HC4_2,Prok-RING_4,zf-RING_UBOX	2.3.2.27	transferase
YLR032W	NP_013132	RAD5	P32849	NP_013132.1 DNA helicase RAD5 [Saccharomyces cerevisiae S288c]	2	nucleus	C914, C917, C932, H934, C937, C940, C957, C960	TrebleClef, Loosened_ZnRibbon, ZincRibbon, Zn2Cys6_ZnFinger	Structural	zf-C3HC4,zf-RING_2,zf-RING_UBOX,zf-C3HC4_3,zf-RING_5	3.6.4.-	hydrolase
YOR380W	NP_015025	RDR1	Q08904	NP_015025.3 Rdr1p [Saccharomyces cerevisiae S288c]	2	nucleus	C20, C23, C30, C36, C39, C46	Zn2Cys6_ZnFinger	Structural	Zn_clus
YCR106W	NP_010031	RDS1	P25611	NP_010031.1 Rds1p [Saccharomyces cerevisiae S288c]	2	Unknown	C15, C18, C25, C32, C35, C42	Zn2Cys6_ZnFinger	Structural	Zn_clus
YPR094W	NP_015419	RDS3	Q06835	NP_015419.1 U2 snRNP complex subunit RDS3 [Saccharomyces cerevisiae S288c]	3	cytosol, nucleus	C11, C23, C26, C30, C33, C46, C49, C58, C61, C73, C76, C86	ZincRibbon	Structural	PHF5
YBR267W	NP_009825	REI1	P38344	NP_009825.4 Rei1p [Saccharomyces cerevisiae S288c]	2	cytosol	C164, C167, H182, H187, C217, C220, H233, H239	C2H2_ZnFinger	Structural	zf-C2H2_2
YPL167C	NP_015158	REV3	P14284	NP_015158.1 Rev3p [Saccharomyces cerevisiae S288c]	1	mitochondrion	C1398, C1401, C1414, C1417	Unknown	Structural	zf-C4pol (Pfam)	2.7.7.7	transferase
YMR182C	NP_013907	RGM1	Q00453	NP_013907.1 Rgm1p [Saccharomyces cerevisiae S288c]	2	cytosol, nucleus	C21, C27, H40, H44, C52, C55, H68, H73	C2H2_ZnFinger	Structural	zf-C2H2,zf-C2H2_6,zf-H2C2_2
YKL038W	NP_012886	RGT1	P32862	NP_012886.3 Rgt1p [Saccharomyces cerevisiae S288c]	2	nucleus	C47, C50, C57, C66, C69, C76	Zn2Cys6_ZnFinger	Structural	Zn_clus
YHL027W	NP_011836	RIM101	P33400	NP_011836.1 alkaline-responsive transcriptional regulator RIM101 [Saccharomyces cerevisiae S288c]	from 1 to 3	nucleus	C148, C153, H166, H171	C2H2_ZnFinger	Structural	Unknown
YDR255C	NP_010541	RMD5	Q12508	NP_010541.3 ubiquitin-protein ligase RMD5 [Saccharomyces cerevisiae S288c]	1	cytosol	C379, H381, C401	TrebleClef	Structural	zf-RING_UBOX
YGR044C	NP_011558	RME1	P32338	NP_011558.1 Rme1p [Saccharomyces cerevisiae S288c]	3	nucleus	C180, C183, H196, E199, C206, C208, H229, H234, C258, C263, H276, H281	C2H2_ZnFinger	Structural	C2H2-type, C2H2-type, C2H2-type
YER169W	NP_011096	RPH1	P39956	NP_011096.1 Rph1p [Saccharomyces cerevisiae S288c]	2	nucleus	C281, H287, H727, H732, C740, C743, C711, C714	C2H2_ZnFinger	Structural	zf-H2C2_2
YKR094C	NP_013020	RPL40B	P0CH09	NP_013020.3 ubiquitin-ribosomal 60S subunit protein L40B fusion protein [Saccharomyces cerevisiae S288c]	1	cytosol	C96, C99, C110, C115	ZincRibbon	Structural	Ribosomal_L40e
YHR141C	NP_014237	RPL42B	P0CX28	NP_014237.2 ribosomal 60S subunit protein L42A [Saccharomyces cerevisiae S288c]	1 or 2	cytosol	C12, C17, H20, H23, C74, C77, C88	ZincRibbon	Structural	Ribosomal_L44 (Pfam)
YJR094W-A	NP_015368	RPL43B	P0CX26	NP_015368.1 ribosomal 60S subunit protein L43A [Saccharomyces cerevisiae S288c]	1	cytosol	C39, C42, C57, C60	ZincRibbon	Structural	C4-type
YIR015W	NP_012280	RPR2	P40571	NP_012280.1 ribonuclease P protein subunit RPR2 [Saccharomyces cerevisiae S288c]	1	nucleus	C90, C93, C115, C117	ZincRibbon	Structural	Zinc-finger	3.1.26.5	hydrolase
YHR021C	NP_011885	RPS27B	P38711	NP_011885.1 ribosomal 40S subunit protein S27B [Saccharomyces cerevisiae S288c]	1	cytosol	C37, C56, C59	ZincRibbon	Structural	Ribosomal_S27e
YJL025W	NP_012509	RRN7	P40992	NP_012509.1 Rrn7p [Saccharomyces cerevisiae S288c]	1	nucleus	C10, C15, C29, H33	Unknown	Structural	zf-RRN7 (Pfam)
YJR127C	NP_012661	RSF2	P46974	NP_012661.3 Rsf2p [Saccharomyces cerevisiae S288c]	2	cytosol, nucleus	C153, C156, H169, C181, C184, H197, H202	C2H2_ZnFinger	Structural	Unknown
YOL138C	NP_014503	RTC1	Q08281	NP_014503.2 Rtc1p [Saccharomyces cerevisiae S288c]	2	vacuolar membrane	C1283, C1286, C1293, C1296, C1310, H1312, H1315, C1318, C1331	TrebleClef, ZincRibbon, Zn2Cys6_ZnFinger	Structural	zf-RING_2,Zn_ribbon_17,zf-rbx1,zf-C3HC4_2
YDR066C	NP_010351	RTR2	Q12378	NP_010351.1 putative protein-serine/threonine phosphatase [Saccharomyces cerevisiae S288c]	1	cytosol	C75, C80, C99, H103	C2H2_ZnFinger	Structural	RPAP2_Rtr1	3.1.3.16	hydrolase
YOR077W	NP_014720	RTS2	P40962	NP_014720.1 Rts2p [Saccharomyces cerevisiae S288c]	1	cytosol, nucleus	C26, C29, H42, H48	C2H2_ZnFinger	Structural	zf-C2H2_jaz
YFR005C	NP_116660	SAD1	P43589	NP_116660.1 mRNA splicing protein SAD1 [Saccharomyces cerevisiae S288c]	1	nucleus	C60, C63, H79, H85	TrebleClef, C2H2_ZnFinger	Structural	zf-UBP
YMR127C	NP_013846	SAS2	P40963	NP_013846.1 Sas2p [Saccharomyces cerevisiae S288c]	1	nucleus	C103, C106, H119, C123	C2H2_ZnFinger	Structural	C2HC MYST-type	2.3.1.48	transferase
YPR022C	NP_015347	SDD4	Q12139	NP_015347.1 Sdd4p [Saccharomyces cerevisiae S288c]	2	cytosol, nucleus	C33, H35, H51, H55	C2H2_ZnFinger	Structural	C2H2-type, C2H2-type
YBL066C	NP_009487	SEF1	P34228	NP_009487.2 Sef1p [Saccharomyces cerevisiae S288c]	2	Unknown	C57, C60, C67, C77, C80, C87	Zn2Cys6_ZnFinger	Structural	Zn_clus
YJL089W	NP_012446	SIP4	P46954	NP_012446.1 Sip4p [Saccharomyces cerevisiae S288c]	2	nucleus	C46, C49, C56, C63, C66, C73	Zn2Cys6_ZnFinger	Structural	Zn_clus
YDL042C	NP_010242	SIR2	P06700	NP_010242.1 NAD-dependent histone deacetylase SIR2 [Saccharomyces cerevisiae S288c]	1	nucleus	C372, C375, C396, C399	ZincRibbon	Structural	SIR2	3.5.1.-	hydrolase
YDR088C	NP_010373	SLU7	Q02775	NP_010373.3 mRNA splicing protein SLU7 [Saccharomyces cerevisiae S288c]	1	nucleus	C122, C125, H130, C135	Shuffled_ZnRibbonII	Structural	Unknown
YBR228W	NP_009787	SLX1	P38324	NP_009787.3 endonuclease [Saccharomyces cerevisiae S288c]	2	nucleus	C218, C221, C241, C246, H251, C254, C279, C282	C2H2_ZnFinger	Structural	SLX1-type	3.1.-.-	hydrolase
YER116C	NP_011041	SLX8	P40072	NP_011041.3 SUMO-targeted ubiquitin ligase complex subunit SLX8 [Saccharomyces cerevisiae S288c]	2	nucleus	C206, C209, C221, H223, C226, C229, C240, C246, C249, S251	TrebleClef, Loosened_ZnRibbon, ZincRibbon, Zn2Cys6_ZnFinger	Structural	zf-C3HC4,zf-C3HC4_3,zf-C3HC4_2	2.3.2.27	transferase
YDR478W	NP_010766	SNM1	P40993	NP_010766.3 Snm1p [Saccharomyces cerevisiae S288c]	1	nucleus	C61, C64, C106, C109	ZincRibbon	Structural	Rpr2
YGL131C	NP_011384	SNT2	P53127	NP_011384.1 DNA-binding E3 ubiquitin-protein ligase SNT2 [Saccharomyces cerevisiae S288c]	6	cytosol, nucleus	C320, C323, C335, C338, H343, C346, C363, C366, C1041, C1044, C1058, C1061, H1066, C1069, C1091, C1094, H1143, C1146, C1179, C1182, C1192, C1195, H1200, C1203	TrebleClef	Structural	zf-HC5HC2H,zf-HC5HC2H_2,PHD	2.3.2.27	transferase
YDL098C	NP_010185	SNU23	Q12368	NP_010185.1 U4/U6-U5 snRNP complex subunit SNU23 [Saccharomyces cerevisiae S288c]	1	nucleus	C82, C85, H98, H104	C2H2_ZnFinger	Structural	zf-C2H2_jaz,zf-met
YPL138C	NP_015187	SPP1	Q03012	NP_015187.1 Spp1p [Saccharomyces cerevisiae S288c]	2	cytosol, nucleus	C25, C27, C39, G41, C42, D43, H47, C50, C66, C69	TrebleClef	Structural	PHD
YNL204C	NP_014195	SPS18	P32572	NP_014195.1 Sps18p [Saccharomyces cerevisiae S288c]	1	Unknown	C28, C31, C48, C51	TrebleClef	Structural	ArfGap
YJL127C	NP_012408	SPT10	P35208	NP_012408.1 Spt10p [Saccharomyces cerevisiae S288c]	1	nucleus	H351, H355, C385, C388	Unknown	Structural	zf-H2C2 (Pfam)
YCR018C	NP_009944	SRD1	P09007	NP_009944.2 Srd1p [Saccharomyces cerevisiae S288c]	1	cytosol, nucleus	C168, C171, C190, C193	TrebleClef	Structural	GATA
YMR019W	NP_013732	STB4	P50104	NP_013732.1 Stb4p [Saccharomyces cerevisiae S288c]	2	nucleus	C87, C90, C97, C103, C106, C113	Zn2Cys6_ZnFinger	Structural	Zn_clus
YHR178W	NP_012048	STB5	P38699	NP_012048.3 Stb5p [Saccharomyces cerevisiae S288c]	2	nucleus	C22, C25, C32, C39, C42, C49	Zn2Cys6_ZnFinger	Structural	Zn_clus
YDR463W	NP_010751	STP1	Q00947	NP_010751.4 Stp1p [Saccharomyces cerevisiae S288c]	3	cytosol, nucleus	C162, C165, H178, H182, C190, C203, H218, H223, C242, C245, H259, C265	C2H2_ZnFinger	Structural	C2H2-type, C2H2-type, C2H2-type
YHR006W	NP_011870	STP2	P38704	NP_011870.1 Stp2p [Saccharomyces cerevisiae S288c]	3	cytosol, nucleus	C206, C209, H222, H226, C234, C247, H262, H267, C286, C289, C309	C2H2_ZnFinger	Structural	C2H2-type, C2H2-type, C2H2-type
YDL048C	NP_010235	STP4	Q07351	NP_010235.1 Stp4p [Saccharomyces cerevisiae S288c]	3	cytosol, nucleus	C306, C309, H322, H326	C2H2_ZnFinger	Structural	C2H2-type
YDR126W	NP_010411	SWF1	Q04629	NP_010411.1 palmitoyltransferase SWF1 [Saccharomyces cerevisiae S288c]	2	ER	C136, C139, H149, C150, C153, C156, D161, H162, H163, C164, C170	ZincRibbon	Structural	zf-DHHC (Pfam)	2.3.1.225	transferase
YDR146C	NP_010430	SWI5	P08153	NP_010430.1 DNA-binding transcription factor SWI5 [Saccharomyces cerevisiae S288c]	from 1 to 3	cytosol, nucleus	C552, C557, H570, H574	C2H2_ZnFinger	Structural	Unknown
YBR150C	NP_009708	TBS1	P38114	NP_009708.1 Tbs1p [Saccharomyces cerevisiae S288c]	2	cytosol, nucleus	C107, C110, C117, C127, C130, C137	Zn2Cys6_ZnFinger	Structural	Zn_clus
YML081W	NP_013630	TDA9	Q04545	NP_013630.1 Tda9p [Saccharomyces cerevisiae S288c]	2	nucleus	C63, C66, H79, H83, C91, C94, H107, H112	C2H2_ZnFinger	Structural	Unknown
YPR056W	NP_015381	TFB4	Q12004	NP_015381.1 TFIIH/NER complex subunit TFB4 [Saccharomyces cerevisiae S288c]	1	nucleus	C289, C291, C315, C318	ZincRibbon	Structural	C4-type
YPL007C	NP_015318	TFC8	Q12308	NP_015318.1 transcription factor TFIIIC subunit TFC8 [Saccharomyces cerevisiae S288c]	1	nucleus	C530, H541, C545	Unknown	Structural	zf-TFIIIC (Pfam)
YBR240C	NP_009799	THI2	P38141	NP_009799.3 Thi2p [Saccharomyces cerevisiae S288c]	2	nucleus	C30, C33, C40, C47, C50, C57	Zn2Cys6_ZnFinger	Structural	Zn_clus
YBR091C	NP_009649	TIM12	P32830	NP_009649.1 Tim12p [Saccharomyces cerevisiae S288c]	1	mitochondrion	C40, C44, C61, C66	Unknown	Structural	zf-Tim10_DDP (Pfam)
YOR052C	NP_014695	TMC1	Q08422	NP_014695.1 Tmc1p [Saccharomyces cerevisiae S288c]	2	nucleus	C85, C90, C101, C104, C109, H112, H118, C120	TrebleClef	Structural	zf-AN1
YER184C	NP_011111	TOG1	P39961	NP_011111.1 Tog1p [Saccharomyces cerevisiae S288c]	2	nucleus	C18, C21, C28, C34, C37, C44	Zn2Cys6_ZnFinger	Structural	Zn_clus
YOL125W	NP_014516	TRM13	Q12383	NP_014516.1 tRNA:m4X modification enzyme [Saccharomyces cerevisiae S288c]	2	cytosol, nucleus	C75, H81, H91, C95	C2H2_ZnFinger	Structural	zf-U11-48K	2.1.1.225	transferase
YKL034W	NP_012890	TUL1	P36096	NP_012890.1 ubiquitin-protein ligase TUL1 [Saccharomyces cerevisiae S288c]	2	Golgi	C699, C702, C729, H731, H734, C737, C748, C751	TrebleClef, ZincRibbon, Zn2Cys6_ZnFinger	Structural	zf-C3HC4,zf-RING_2,zf-RING_5,zf-C3HC4_2,zf-RING_UBOX,zf-rbx1	2.3.2.27	transferase
YBR012W-B	NP_009567	TY1B-BR	Q12193	NP_009567.1 gag-pol fusion protein [Saccharomyces cerevisiae S288c]	1	nucleus	H599, H604, C637, C640	Unknown	Structural	Integrase-type zinc finger-like	3.4.23.-, 2.7.7.49, 2.7.7.7, 3.1.26.4	hydrolase, transferase
YDR098C-B	NP_058140	TY1B-DR1	Q03855	NP_058140.1 gag-pol fusion protein [Saccharomyces cerevisiae S288c]	1	nucleus	H599, H604, C637, C640	Unknown	Structural	Integrase-type zinc finger-like	3.4.23.-, 2.7.7.49, 2.7.7.7, 3.1.26.4	hydrolase, transferase
YDR210C-D	NP_620387	TY1B-DR3	Q99231	NP_620387.1 gag-pol fusion protein [Saccharomyces cerevisiae S288c]	1	nucleus	H599, H604, C637, C640	Unknown	Structural	Integrase-type zinc finger-like	3.4.23.-, 2.7.7.49, 2.7.7.7, 3.1.26.4	hydrolase, transferase
YDR261C-D	NP_058148	TY1B-DR4	Q07793	NP_058148.1 gag-pol fusion protein [Saccharomyces cerevisiae S288c]	1	nucleus	H599, H604, C637, C640	Unknown	Structural	Integrase-type zinc finger-like	3.4.23.-, 2.7.7.49, 2.7.7.7, 3.1.26.4	hydrolase, transferase
YDR365W-B	NP_058152	TY1B-DR6	P0C2I3	NP_058152.1 gag-pol fusion protein [Saccharomyces cerevisiae S288c]	1	nucleus	H599, H604, C637, C640	Unknown	Structural	Integrase-type zinc finger-like	3.4.23.-, 2.7.7.49, 2.7.7.7, 3.1.26.4	hydrolase, transferase
YER138C	NP_011064	TY1B-ER1	Q03612	NP_011064.3 gag-pol fusion protein [Saccharomyces cerevisiae S288c]	1	nucleus	H599, H604, C637, C640	Unknown	Structural	Integrase-type zinc finger-like	3.4.23.-, 2.7.7.49, 2.7.7.7, 3.1.26.4	hydrolase, transferase
YER160C	NP_011087	TY1B-ER2	Q03619	NP_011087.3 gag-pol fusion protein [Saccharomyces cerevisiae S288c]	1	nucleus	H599, H604, C637, C640	Unknown	Structural	Integrase-type zinc finger-like	3.4.23.-, 2.7.7.49, 2.7.7.7, 3.1.26.4	hydrolase, transferase
YGR027W-B	NP_058158	TY1B-GR1	Q12141	NP_058158.1 gag-pol fusion protein [Saccharomyces cerevisiae S288c]	1	nucleus	H599, H604, C637, C640	Unknown	Structural	Integrase-type zinc finger-like	3.4.23.-, 2.7.7.49, 2.7.7.7, 3.1.26.4	hydrolase, transferase
YGR038C-B	NP_058160	TY1B-GR2	Q12269	NP_058160.1 gag-pol fusion protein [Saccharomyces cerevisiae S288c]	1	nucleus	H599, H604, C637, C640	Unknown	Structural	Integrase-type zinc finger-like	3.4.23.-, 2.7.7.49, 2.7.7.7, 3.1.26.4	hydrolase, transferase
YGR161C-D	NP_058165	TY1B-GR3	Q12316	NP_058165.3 gag-pol fusion protein [Saccharomyces cerevisiae S288c]	1	nucleus	H599, H604, C637, C640	Unknown	Structural	Integrase-type zinc finger-like	3.4.23.-, 2.7.7.49, 2.7.7.7, 3.1.26.4	hydrolase, transferase
YHR214C-B	NP_012086	TY1B-H	O13535	NP_012086.1 gag-pol fusion protein [Saccharomyces cerevisiae S288c]	1	nucleus	H637, H642, C475, C478	Unknown	Structural	Integrase-type zinc finger-like	3.4.23.-, 2.7.7.49, 2.7.7.7, 3.1.26.4	hydrolase, transferase
YLR035C-A	NP_013136	TY1B-LR1	Q12088	NP_013136.1 gag-pol fusion protein [Saccharomyces cerevisiae S288c]	1	nucleus	H599, H604, C637, C640	Unknown	Structural	Integrase-type zinc finger-like	3.4.23.-, 2.7.7.49, 2.7.7.7, 3.1.26.4	hydrolase, transferase
YLR157C-B	NP_058169	TY1B-LR2	P0C2I5	NP_058169.1 gag-pol fusion protein [Saccharomyces cerevisiae S288c]	1	nucleus	H599, H604, C637, C640	Unknown	Structural	Integrase-type zinc finger-like	3.4.23.-, 2.7.7.49, 2.7.7.7, 3.1.26.4	hydrolase, transferase
YLR227W-B	NP_058171	TY1B-LR3	P0C2I6	NP_058171.1 gag-pol fusion protein [Saccharomyces cerevisiae S288c]	1	nucleus	H599, H604, C637, C640	Unknown	Structural	Integrase-type zinc finger-like	3.4.23.-, 2.7.7.49, 2.7.7.7, 3.1.26.4	hydrolase, transferase
YML045W	NP_013668	TY1B-ML1	Q04711	NP_013668.1 gag-pol fusion protein [Saccharomyces cerevisiae S288c]	1	nucleus	H599, H604, C637, C640	Unknown	Structural	Integrase-type zinc finger-like	3.4.23.-, 2.7.7.49, 2.7.7.7, 3.1.26.4	hydrolase, transferase
YML039W	NP_013672	TY1B-ML2	Q03434	NP_013672.1 gag-pol fusion protein [Saccharomyces cerevisiae S288c]	1	nucleus	H599, H604, C637, C640	Unknown	Structural	Integrase-type zinc finger-like	3.4.23.-, 2.7.7.49, 2.7.7.7, 3.1.26.4	hydrolase, transferase
YMR050C	NP_013765	TY1B-MR2	Q04670	NP_013765.1 gag-pol fusion protein [Saccharomyces cerevisiae S288c]	1	nucleus	H599, H604, C637, C640	Unknown	Structural	Integrase-type zinc finger-like	3.4.23.-, 2.7.7.49, 2.7.7.7, 3.1.26.4	hydrolase, transferase
YNL284C-B	NP_058178	TY1B-NL1	Q12112	NP_058178.1 gag-pol fusion protein [Saccharomyces cerevisiae S288c]	1	nucleus	H599, H604, C637, C640	Unknown	Structural	Integrase-type zinc finger-like	3.4.23.-, 2.7.7.49, 2.7.7.7, 3.1.26.4	hydrolase, transferase
YOL103W-B	NP_058181	TY1B-OL	Q12273	NP_058181.1 gag-pol fusion protein [Saccharomyces cerevisiae S288c]	1	nucleus	H599, H604, C637, C640	Unknown	Structural	Integrase-type zinc finger-like	3.4.23.-, 2.7.7.49, 2.7.7.7, 3.1.26.4	hydrolase, transferase
YOR142W-B/YOR3367W	NP_058183	TY1B-OR	Q92393	NP_058183.1 gag-pol fusion protein [Saccharomyces cerevisiae S288c]	1	nucleus	H599, H604, C637, C640	Unknown	Structural	Integrase-type zinc finger-like	3.4.23.-, 2.7.7.49, 2.7.7.7, 3.1.26.4	hydrolase, transferase
YPL257W-B	NP_058189	TY1B-PL	Q12414	NP_058189.1 gag-pol fusion protein [Saccharomyces cerevisiae S288c]	1	nucleus	H599, H604, C637, C640	Unknown	Structural	Integrase-type zinc finger-like	3.4.23.-, 2.7.7.49, 2.7.7.7, 3.1.26.4	hydrolase, transferase
YPR137C-B	NP_058191	TY1B-PR1	P0C2I9	NP_058191.1 gag-pol fusion protein [Saccharomyces cerevisiae S288c]	1	nucleus	H599, H604, C637, C640	Unknown	Structural	Integrase-type zinc finger-like	3.4.23.-, 2.7.7.49, 2.7.7.7, 3.1.26.4	hydrolase, transferase
YPR158W-B	NP_058193	TY1B-PR2	P0C2J0	NP_058193.1 gag-pol fusion protein [Saccharomyces cerevisiae S288c]	1	nucleus	H599, H604, C637, C640	Unknown	Structural	Integrase-type zinc finger-like	3.4.23.-, 2.7.7.49, 2.7.7.7, 3.1.26.4	hydrolase, transferase
YPR158C-D	NP_058195	TY1B-PR3	P0C2J1	NP_058195.1 gag-pol fusion protein [Saccharomyces cerevisiae S288c]	1	nucleus	H599, H604, C637, C640	Unknown	Structural	Integrase-type zinc finger-like	3.4.23.-, 2.7.7.49, 2.7.7.7, 3.1.26.4	hydrolase, transferase
YCL019W	NP_009909	TY2B-C	P25384	NP_009909.2 gag-pol fusion protein [Saccharomyces cerevisiae S288c]	1	nucleus	H595, H600, C633, C636	Unknown	Structural	Integrase-type zinc finger-like	3.4.23.-, 2.7.7.49, 2.7.7.7, 3.1.26.4	hydrolase, transferase
YDR034C-D	NP_058138	TY2B-DR1	Q12472	NP_058138.3 gag-pol fusion protein [Saccharomyces cerevisiae S288c]	1	nucleus	H595, H600, C633, C636	Unknown	Structural	Integrase-type zinc finger-like	3.4.23.-, 2.7.7.49, 2.7.7.7, 3.1.26.4	hydrolase, transferase
YDR210W-B	NP_058142	TY2B-DR2	Q03494	NP_058142.3 gag-pol fusion protein [Saccharomyces cerevisiae S288c]	1	nucleus	H595, H600, C633, C636	Unknown	Structural	Integrase-type zinc finger-like	3.4.23.-, 2.7.7.49, 2.7.7.7, 3.1.26.4	hydrolase, transferase
YDR261W-B	NP_058146	TY2B-DR3	Q07791	NP_058146.3 gag-pol fusion protein [Saccharomyces cerevisiae S288c]	1	nucleus	H595, H600, C633, C636	Unknown	Structural	Integrase-type zinc finger-like	3.4.23.-, 2.7.7.49, 2.7.7.7, 3.1.26.4	hydrolase, transferase
YFL002W-A	NP_116653	TY2B-F	P0CX63	NP_116653.1 gag-pol fusion protein [Saccharomyces cerevisiae S288c]	1	nucleus	H595, H600, C633, C636	Unknown	Structural	Integrase-type zinc finger-like	3.4.23.-, 2.7.7.49, 2.7.7.7, 3.1.26.4	hydrolase, transferase
YGR161W-B	NP_058163	TY2B-GR2	P0CX64	NP_058163.1 gag-pol fusion protein [Saccharomyces cerevisiae S288c]	1	nucleus	H595, H600, C633, C636	Unknown	Structural	Integrase-type zinc finger-like	3.4.23.-, 2.7.7.49, 2.7.7.7, 3.1.26.4	hydrolase, transferase
YOR192C-B	NP_058185	TY2B-OR1	Q12113	NP_058185.3 gag-pol fusion protein [Saccharomyces cerevisiae S288c]	1	nucleus	H595, H600, C633, C636	Unknown	Structural	Integrase-type zinc finger-like	3.4.23.-, 2.7.7.49, 2.7.7.7, 3.1.26.4	hydrolase, transferase
YOR343W-B	NP_620389	TY2B-OR2	Q12501	NP_620389.3 gag-pol fusion protein [Saccharomyces cerevisiae S288c]	1	nucleus	H595, H600, C633, C636	Unknown	Structural	Integrase-type zinc finger-like	3.4.23.-, 2.7.7.49, 2.7.7.7, 3.1.26.4	hydrolase, transferase
YGR109W-A	NP_058162	TY3A-G	Q12173	NP_058162.3 gag protein [Saccharomyces cerevisiae S288c]	1	cytosol	C267, C270, H275, C280	Shuffled_ZnRibbonII	Structural	Unknown
YGR109W-B	NP_011624	TY3B-G	Q99315	NP_011624.1 gag-pol fusion protein [Saccharomyces cerevisiae S288c]	1	nucleus	C267, C270, H275, C280, E860	Shuffled_ZnRibbonII	Structural	Unknown	3.4.23.-, 2.7.7.49, 2.7.7.7, 3.1.26.4	hydrolase, transferase
YIL082W-A	NP_012184	TY3B-I	Q7LHG5	NP_012184.1 gag-pol fusion protein [Saccharomyces cerevisiae S288c]	1	nucleus	C267, C270, H275, C280, E886	Shuffled_ZnRibbonII	Structural	Unknown	3.4.23.-, 2.7.7.49, 2.7.7.7, 3.1.26.4	hydrolase, transferase
YHL009W-A	NP_058134	TY4A-H	Q6Q5P6	NP_058134.1 gag protein [Saccharomyces cerevisiae S288c]	1	nucleus			Structural
YJL114W	NP_012422	TY4A-J	P47023	NP_012422.2 gag protein [Saccharomyces cerevisiae S288c]	1	nucleus			Structural
YHL009W-B/YHL008W-A	NP_058133	TY4B-H	P0C2J7	NP_058133.1 gag-pol fusion protein [Saccharomyces cerevisiae S288c]	1	nucleus	H561, H566, C596, C599	Unknown	Structural	Integrase-type zinc finger-like	3.4.23.-, 2.7.7.49, 2.7.7.7, 3.1.26.4	hydrolase, transferase
YJL113W	NP_012421	TY4B-J	P47024	NP_012421.2 gag-pol fusion protein [Saccharomyces cerevisiae S288c]	1	mitochondrion, nucleus	H562, H567, C597, C600	Unknown	Structural	Integrase-type zinc finger-like	3.4.23.-, 2.7.7.49, 2.7.7.7, 3.1.26.4	hydrolase, transferase
YPR066W	NP_015391	UBA3	Q99344	NP_015391.1 NEDD8-activating protein UBA3 [Saccharomyces cerevisiae S288c]	1	cytosol	C150, C153	TrebleClef	Structural	ThiF	6.3.2.-	ligase
YKR098C	NP_013024	UBP11	P36026	NP_013024.1 ubiquitin-specific protease UBP11 [Saccharomyces cerevisiae S288c]	1	Unknown	C462-C465-C520-C523	ZincRibbon	Structural	UCH_1	3.4.19.12	hydrolase
YBL067C	NP_009486	UBP13	P38187	NP_009486.3 ubiquitin-specific protease UBP13 [Saccharomyces cerevisiae S288c]	1	Unknown	C488-C491-C537-C540	ZincRibbon	Structural	UCH_1	3.4.19.12	hydrolase
YER144C	NP_011071	UBP5	P39944	NP_011071.3 putative ubiquitin-specific protease UBP5 [Saccharomyces cerevisiae S288c]	1	Unknown	C619-C622-C668-C671	ZincRibbon	Structural	UCH_1,Rhodanese	3.4.19.12	hydrolase
YIL156W	NP_012110	UBP7	P40453	NP_012110.1 ubiquitin-specific protease UBP7 [Saccharomyces cerevisiae S288c]	1	cytosol	C777-C780-C838-C841	ZincRibbon	Structural	UCH_1	3.4.19.12	hydrolase
YMR223W	NP_013950	UBP8	P50102	NP_013950.1 ubiquitin-specific protease UBP8 [Saccharomyces cerevisiae S288c]	5	nucleus	C46, C49, C60, C63, C68, H73, H77, H83, C96, C99, H170, C174, C182, C185, H250, C271, C273, H276, C289, C292, C336, C339	TrebleClef, C2H2_ZnFinger	Structural	zf-UBP,UCH_1,UCH	3.4.19.12	hydrolase
YER098W	NP_011024	UBP9	P39967	NP_011024.1 putative ubiquitin-specific protease UBP9 [Saccharomyces cerevisiae S288c]	1	Unknown	C487-C490-C536-C539	ZincRibbon	Structural	UCH_1	3.4.19.12	hydrolase
YLR024C	NP_013124	UBR2	Q07963	NP_013124.1 putative ubiquitin-protein ligase UBR2 [Saccharomyces cerevisiae S288c]	3 or 4	cytosol	C98, C111, C114, C123, C126, H132, H135, C150, C152, C167	NoCluster	Structural	zf-UBR	2.3.2.27	transferase
YDL170W	NP_010111	UGA3	P26370	NP_010111.1 Uga3p [Saccharomyces cerevisiae S288c]	2	nucleus	C17, C20, C27, C34, C37, C44	Zn2Cys6_ZnFinger	Structural	Zn_clus
YDR213W	NP_010499	UPC2	Q12151	NP_010499.1 Upc2p [Saccharomyces cerevisiae S288c]	2	cytosol, nucleus	C51, C54, C61, C68, C71, C78	Zn2Cys6_ZnFinger	Structural	Zn_clus
YDR520C	NP_010808	URC2	Q04411	NP_010808.3 Urc2p [Saccharomyces cerevisiae S288c]	2	cytosol, nucleus	C72, C75, C82, C91, C94, C101	Zn2Cys6_ZnFinger	Structural	Zn_clus
YPL230W	NP_015094	USV1	Q12132	NP_015094.1 Usv1p [Saccharomyces cerevisiae S288c]	2	nucleus	C43, C49, H62, H66, C74, C77, H90, H95	C2H2_ZnFinger	Structural	zf-C2H2,zf-H2C2_2
YER128W	NP_011054	VFA1	P40080	NP_011054.3 Vfa1p [Saccharomyces cerevisiae S288c]	1	endosome	C18, C21, C41, C44	Unknown	Structural	Vfa1 (Pfam)
YLR417W	NP_013521	VPS36	Q06696	NP_013521.3 ESCRT-II subunit protein VPS36 [Saccharomyces cerevisiae S288c]	2	endosome	C120, C123, C143, C146, C183, C186, C197, C200	ZincRibbon	Structural	Vps36-NZF-N
YML041C	NP_013671	VPS71	Q03433	NP_013671.1 Vps71p [Saccharomyces cerevisiae S288c]	2	nucleus	C244-C247-C256-C259-C264-C268-H272-C277	C2H2_ZnFinger	Structural	HIT-type
YAL002W	NP_009399	VPS8	P39702	NP_009399.2 CORVET complex membrane-binding subunit VPS8 [Saccharomyces cerevisiae S288c]	2	endosome	C1198, C1201, C1241, H1243, H1246, C1249, C1262, C1265	Unknown	Structural	RING-type
YLR090W	NP_013191	XDJ1	P39102	NP_013191.1 Xdj1p [Saccharomyces cerevisiae S288c]	2	mitochondrion	C159, C162, C181, C184, C208, C211, C228, C231	Shuffled_ZnRibbon	Structural	DnaJ_CXXCXGXG
YCR087C-A	NP_010011	YCR087C-A	P37263	NP_010011.1 hypothetical protein YCR087C-A [Saccharomyces cerevisiae S288c]	1 or 2	Unknown	C32, C35, H48, C51	Loosened_ZnRibbon	Structural	zf-LYAR
YER137C	NP_011063	YER137C	P40083	NP_011063.3 hypothetical protein YER137C [Saccharomyces cerevisiae S288c]	1	Unknown	C125, C128, H133, C138	Unknown	Structural	zf-C2H2_10
YFL052W	NP_116603	YFF2	P43551	NP_116603.1 DNA-binding domain containing protein [Saccharomyces cerevisiae S288c]	2	nucleus	C8, C11, C18, C24, C27, C34	Zn2Cys6_ZnFinger	Structural	Zn_clus (Pfam)
YGR067C	NP_011581	YGA2	P53243	NP_011581.4 hypothetical protein YGR067C [Saccharomyces cerevisiae S288c]	1 or 2	Unknown	C38, V40, C41, H43, H54, H59, C10, C13	C2H2_ZnFinger	Structural	zf-C2H2
YLR298C	NP_013401	YHC1	Q05900	NP_013401.1 Yhc1p [Saccharomyces cerevisiae S288c]	1	nucleus	C6, C9, H24, H30	C2H2_ZnFinger	Structural	zf-U1
YJL206C	NP_012329	YJL206C	P39529	NP_012329.1 hypothetical protein YJL206C [Saccharomyces cerevisiae S288c]	2	Unknown	C47, C50, C57, C63, C66, C73	Zn2Cys6_ZnFinger	Structural	Zn_clus
YKL222C	NP_012700	YKL222C	P35995	NP_012700.1 hypothetical protein YKL222C [Saccharomyces cerevisiae S288c]	2	nucleus	C24, C27, C34, C41, C44, C52	Zn2Cys6_ZnFinger	Structural	Zn_clus
YKR023W	NP_012948	YKR023W	P36119	NP_012948.3 hypothetical protein YKR023W [Saccharomyces cerevisiae S288c]	2	cytosol	C176, C178, H183, C192, C195, C200, C210, C213	Unknown	Structural	zf-C2HC5 (Pfam)
YLL054C	NP_013046	YLL054C	Q12244	NP_013046.2 hypothetical protein YLL054C [Saccharomyces cerevisiae S288c]	2	Unknown	C15, C18, C25, C32, C35, C42	Zn2Cys6_ZnFinger	Structural	Zn_clus
YLR278C	NP_013380	YLR278C	Q05854	NP_013380.1 hypothetical protein YLR278C [Saccharomyces cerevisiae S288c]	2	nucleus	C41, C44, C51, C58, C61, C68	Zn2Cys6_ZnFinger	Structural	Zn_clus
YOR064C	NP_014707	YNG1	Q08465	NP_014707.1 Yng1p [Saccharomyces cerevisiae S288c]	2	nucleus	C158, C160, Y165, C171, C176, H182, C185, C198, C202	TrebleClef	Structural	Unknown
YHR090C	NP_011958	YNG2	P38806	NP_011958.1 histone acetyltransferase YNG2 [Saccharomyces cerevisiae S288c]	2	cytosol, nucleus	C225, C227, C238, C243, H249, C252, C265, C268	TrebleClef	Structural	PHD
YNR063W	NP_014461	YNR063W	P53749	NP_014461.3 hypothetical protein YNR063W [Saccharomyces cerevisiae S288c]	2	Unknown	C16, C19, C26, C32, C35, C44	Zn2Cys6_ZnFinger	Structural	Zn_clus
YPR015C	NP_015340	YP015	Q12531	NP_015340.1 hypothetical protein YPR015C [Saccharomyces cerevisiae S288c]	2 or 3	Unknown	C187, C190, K192, C194, H203, H207, C215, C220, K222, H233, H237	C2H2_ZnFinger	Structural	zf-C2H2
YPR196W	NP_015522	YP196	Q06595	NP_015522.1 putative maltose-responsive transcription factor [Saccharomyces cerevisiae S288c]	2	Unknown	C8, C11, C18, C24, C27, C34	Zn2Cys6_ZnFinger	Structural	Zn_clus
YOR172W	NP_014815	YRM1	Q12340	NP_014815.3 Yrm1p [Saccharomyces cerevisiae S288c]	2	cytosol, nucleus	C31, C34, C41, C48, C51, C59	Zn2Cys6_ZnFinger	Structural	Zn_clus
YOR162C	NP_014805	YRR1	Q12172	NP_014805.3 Yrr1p [Saccharomyces cerevisiae S288c]	2	nucleus	C54, C57, C64, C71, C74, C82	Zn2Cys6_ZnFinger	Structural	Zn_clus
YPR107C	NP_015432	YTH1	Q06102	NP_015432.1 cleavage polyadenylation factor RNA-binding subunit YTH1 [Saccharomyces cerevisiae S288c]	5	cytosol, nucleus	C67, C75, C81, H85, C95, C104, C110, H114	ZincNecklaces	Structural	zf-CCCH_3
YIL023C	NP_012241	YKE4	P40544	NP_012241.1 Zn(2+) transporter YKE4 [Saccharomyces cerevisiae S288c]	N/A	ER	Unknown	Unknown	Transport	ZIP (Pfam)
YNR039C	NP_014437	ZRG17	P53735	NP_014437.1.	N/A	ER			Transport
YLR130C	NP_013231	ZRT2	Q12436	NP_013231.1 low-affinity Zn(2+) transporter ZRT2 [Saccharomyces cerevisiae S288c]	N/A	plasma membrane	Unknown	Unknown	Transport	ZIP (Pfam)
YOR034C	NP_014677	AKR2	Q12013	NP_014677.1 putative palmitoyltransferase AKR2 [Saccharomyces cerevisiae S288c]	1 or 2	Golgi	C448, D473, H474, C476	Unknown	Unknown	Unknown	2.3.1.225	transferase
YNL054W-B	NP_001268	CHKA	P35790	NP_001268465.1 gag-pol fusion protein [Saccharomyces cerevisiae S288c]	1	nucleus	Unknown	Unknown	Unknown	Unknown	2.7.1.32, 2.7.1.82	transferase
YDL209C	NP_010072	CWC2	Q12046	NP_010072.1 Cwc2p [Saccharomyces cerevisiae S288c]	1	nucleus	C73, C81, C87, H91	ZincNecklaces	Unknown	Torus
YLR246W	NP_013347	ERF2	Q06551	NP_013347.1 palmitoyltransferase ERF2 [Saccharomyces cerevisiae S288c]	1 or 2	ER	C175, C178, C189, C192	Unknown	Unknown	Unknown	2.3.1.225	transferase
YDR291W	NP_010577	HRQ1	Q05549	NP_010577.3 ATP-dependent 3'-5' DNA helicase [Saccharomyces cerevisiae S288c]	1	nucleus	C979-C981-C985-C988	Unknown	Unknown	DUF1998	3.6.4.12	hydrolase
YER051W	NP_010971	JHD1	P40034	NP_010971.1 [Histone H3]-lysine-36 demethylase [Saccharomyces cerevisiae S288c]	2	Unknown	C928, C931, C944, H946, H949, C952, C969, C972	Unknown	Unknown	Unknown	1.14.11.27	oxidoreductase
YNL218W	NP_014181	MGS1	P40151	NP_014181.1 ssDNA-dependent ATPase MGS1 [Saccharomyces cerevisiae S288c]	1	cytosol, nucleus	C14, C17, H29, C33	Unknown	Unknown	Unknown
YOR274W	NP_014917	MOD5	P07884	NP_014917.3 tRNA dimethylallyltransferase [Saccharomyces cerevisiae S288c]	1	cytosol, nucleus	C375, C378, H397, H403	Unknown	Unknown	Unknown	2.5.1.75	transferase
YBL049W	NP_009504	MOH1	P38191	NP_009504.1 Moh1p [Saccharomyces cerevisiae S288c]	1	Unknown	C45, C48, C101, C104	Unknown	Unknown	Yippee-Mis18
YOL033W	NP_014609	MSE1	P48525	NP_014609.1 glutamate--tRNA ligase MSE1 [Saccharomyces cerevisiae S288c]	1	mitochondrion	C140, C142, Y165, C169	NoCluster	Unknown	tRNA-synt_1c	6.1.1.17	ligase
YHR035W	NP_011900	NEL1	P38769	NP_011900.1 Nel1p [Saccharomyces cerevisiae S288c]	1	cytosol	C27, C30, C48, C51	Unknown	Unknown	Unknown
YNL326C	NP_014073	PFA3	P42836	NP_014073.1 palmitoyltransferase PFA3 [Saccharomyces cerevisiae S288c]	1 or 2	vacuole	C106, C109, C120, C123	Unknown	Unknown	Unknown	2.3.1.225	transferase
YOL003C	NP_014640	PFA4	Q12006	NP_014640.1 palmitoyltransferase PFA4 [Saccharomyces cerevisiae S288c]	1 or 2	ER	C80, C83, C94, C97	Unknown	Unknown	Unknown	2.3.1.225	transferase
YDR459C	NP_010747	PFA5	Q03289	NP_010747.1 palmitoyltransferase PFA5 [Saccharomyces cerevisiae S288c]	2	plasma membrane	C131, C134, H143, C151, D156, H157, C159	Unknown	Unknown	Unknown	2.3.1.225	transferase
YPL096W	NP_015229	PNG1	Q02890	NP_015229.1 peptide-N4-(N-acetyl-beta-glucosaminyl)asparagine amidase [Saccharomyces cerevisiae S288c]	1	cytosol, nucleus	C129, C132, C165, C168	Unknown	Unknown	Unknown	3.5.1.52	hydrolase
YMR201C	NP_013928	RAD14	P28519	NP_013928.1 Rad14p [Saccharomyces cerevisiae S288c]	1	nucleus	C191, C194, C213, C216	Unknown	Unknown	Unknown
YDR419W	NP_010707	RAD30	Q04049	NP_010707.3 DNA-directed DNA polymerase eta [Saccharomyces cerevisiae S288c]	1	mitochrondrion, nucleus	C53, C84, H568, H572	Unknown	Unknown	Unknown	2.7.7.7	transferase
YGL163C	NP_011352	RAD54	P32863	NP_011352.1 DNA-dependent ATPase RAD54 [Saccharomyces cerevisiae S288c]	1	nucleus	H835, C840, C843	Unknown	Unknown	Unknown	3.6.4.-	hydrolase
YPL133C	NP_015192	RDS2	P19541	NP_015192.1 Rds2p [Saccharomyces cerevisiae S288c]	2 o 3	nucleus	C18, C20, C27,C33, C36, C45	Unknown	Unknown	Unknown
YPL183W-A	NP_015141	RTC6	O14464	NP_015141.1 putative mitochondrial 54S ribosomal protein RTC6 [Saccharomyces cerevisiae S288c]	1	mitochondrion	C66, C69, C82, H88	ZincRibbon	Unknown	Ribosomal_L36
YBL052C	NP_009501	SAS3	P34218	NP_009501.1 Sas3p [Saccharomyces cerevisiae S288c]	1	nucleus	C303, C306, H319, C323	Unknown	Unknown	Unknown	2.3.1.48	transferase
YHR119W	NP_011987	SET1	P38827	NP_011987.1 histone methyltransferase SET1 [Saccharomyces cerevisiae S288c]	1	nucleus	C1019, C1068, C1070, C1075	ZincNecklaces	Unknown	SET	2.1.1.43	transferase
YPL165C	NP_015160	SET6	Q12529	NP_015160.1 Set6p [Saccharomyces cerevisiae S288c]	1	Unknown	C306, C360, C362, C365	ZincNecklaces	Unknown	SET	2.1.1.-	transferase
YMR190C	NP_013915	SGS1	P35187	NP_013915.1 ATP-dependent DNA helicase SGS1 [Saccharomyces cerevisiae S288c]	1	nucleus	C1047, C1065, C1069, C1072	TrebleClef	Unknown	RecQ_Zn_bind	3.6.4.12	hydrolase
YLR375W	NP_013479	STP3	Q05937	NP_013479.3 Stp3p [Saccharomyces cerevisiae S288c]	1	nucleus	C171, C174, H187, H191	Unknown	Unknown	Unknown
YBL100W-B	NP_009450	TY2B-B	Q12491	NP_009450.1 gag-pol fusion protein [Saccharomyces cerevisiae S288c]	1	nucleus	H595, H600, C633, C636	Unknown	Unknown	Unknown	3.4.23.-, 2.7.7.49, 2.7.7.7, 3.1.26.4	hydrolase, transferase
YJL114W	NP_012422	TY4A-J	P47023	NP_012422.2 gag protein [Saccharomyces cerevisiae S288c]	1	Unknown	C274-C277-C342-C345-C351-C355		Unknown	Unknown
YOR387C	NP_015032	YOR387C	Q08910	NP_015032.3 hypothetical protein YOR387C [Saccharomyces cerevisiae S288c]	1	cytosol	Unknown	Unknown	Unknown	Vel1p
YJL105W	NP_012430	SET4	P42948	NP_012430.1 Set4p [Saccharomyces cerevisiae S288c]	2	Unknown	C163, C165, C178, C181, H186, C189, C204, C207, C430, C516	ZincNecklaces, TrebleClef	Unknown,Structural	SET,PHD_2,PHD
