# Supplementary material for: The cellular economy of the Saccharomyces cerevisiae zinc proteome
Source: Royal Society of Chemistry journal article supplement (doi:10.1039/c8mt00269j), 2018-01-01
Supplement: c8mt00269j3.xlsx [file c8mt00269j3.xlsx]

## Sheet: Table S2
Systematic Name	NCBI code	Standard Name	Uniprot ID	Annotation	Predicted Number of Zinc Ions Per Monomer	Zinc ligands	Zinc Site Type	Zn Function	Zn-binding domain	EC number	Enzyme Class
YLR433C	NP_013537	CNA1	P23287	NP_013537.1 calcineurin catalytic subunit A [Saccharomyces cerevisiae S288c]	1 or 2	D119-H121-D147-N179-H228-H317	NO_CLUS	Catalytic	Metallophos	3.1.3.16	hydrolase
YML016C	NP_013696	PPZ1	P26570	NP_013696.1 salt homeostasis regulator [Saccharomyces cerevisiae S288c]	1 or 2	D419-H421-D447-N479-H528-H603	NO_CLUS	Catalytic	Metallophos	3.1.3.16	hydrolase
YPL224C	NP_015100	MMT2	Q08970	NP_015100.2 Mmt2p [Saccharomyces cerevisiae S288c]	Unknown	Unknown	Unknown	Substrate - transport	Cation_efflux
YMR177W	NP_013902	MMT1	Q03218	NP_013902.1 Mmt1p [Saccharomyces cerevisiae S288c]	Unknown	Unknown	Unknown	Substrate - transport	Cation_efflux
YDL047W	NP_010236	SIT4	P20604	NP_010236.1 type 2A-related serine/threonine-protein phosphatase SIT4 [Saccharomyces cerevisiae S288c]	1 or 2	D53-H55-D82-N114-H164-H238	NO_CLUS	Catalytic	Metallophos	3.1.3.16	hydrolase
YDL134C	NP_010147	PPH21	P23594	NP_010147.1 phosphoprotein phosphatase 2A catalytic subunit PPH21 [Saccharomyces cerevisiae S288c]	1 or 2	D117-H119-D145-N177-H227-H301	NO_CLUS	Catalytic	Metallophos	3.1.3.16	hydrolase
YDL188C	NP_010093	PPH22	P23595	NP_010093.1 phosphoprotein phosphatase 2A catalytic subunit PPH22 [Saccharomyces cerevisiae S288c]	1 or 2	D125-H127-D153-N185-H235-H309	NO_CLUS	Catalytic	Metallophos	3.1.3.16	hydrolase
YER133W	NP_011059	GLC7	P32598	NP_011059.3 type 1 serine/threonine-protein phosphatase catalytic subunit GLC7 [Saccharomyces cerevisiae S288c]	1 or 2	D63-H65-D91-N123-H172-H247	NO_CLUS	Catalytic	Metallophos	3.1.3.16	hydrolase
YGR123C	NP_011639	PPT1	P53043	NP_011639.3 protein serine/threonine phosphatase [Saccharomyces cerevisiae S288c]	1 or 2	D249-H251-D278-N310-H359-H434	NO_CLUS	Catalytic	Metallophos	3.1.3.16	hydrolase
YML057W	NP_013655	CMP2	P14747	NP_013655.1 calcineurin catalytic subunit A [Saccharomyces cerevisiae S288c]	1 or 2	D144-H146-D172-N204-H253-H359	NO_CLUS	Catalytic	Metallophos	3.1.3.16	hydrolase
YDR436W	NP_010724	PPZ2	P33329	NP_010724.1 salt homeostasis regulator [Saccharomyces cerevisiae S288c]	1 or 2	D454-H456-D482-N514-H563-H638	NO_CLUS	Catalytic	Metallophos	3.1.3.16	hydrolase
YNR032W	NP_014429	PPG1	P32838	NP_014429.3 putative serine/threonine-protein kinase PPG1 [Saccharomyces cerevisiae S288c]	1 or 2	D50-H52-D78-N110-H161-H247	NO_CLUS	Catalytic	Metallophos	3.1.3.16	hydrolase
YDR075W	NP_010360	PPH3	P32345	NP_010360.1 phosphoprotein phosphatase PP4 catalytic subunit PPH3 [Saccharomyces cerevisiae S288c]	1 or 2	D51-H53-D79-N111-H161-H235	NO_CLUS	Catalytic	Metallophos	3.1.3.16	hydrolase
YPL179W	NP_015146	PPQ1	P32945	NP_015146.1 Ppq1p [Saccharomyces cerevisiae S288c]	1 or 2	D301-H303-D329-N361-H410-H485	NO_CLUS	Catalytic	Metallophos	3.1.3.16	hydrolase
YMR224C	NP_013951	MRE11	P32829	NP_013951.1 MRX complex nuclease subunit [Saccharomyces cerevisiae S288c]	1 or 2	D16-H18-D56-N124-H241	NO_CLUS	Catalytic	Metallophos
YDR452W	NP_010740	PPN1	Q04119	NP_010740.3 endopolyphosphatase [Saccharomyces cerevisiae S288c]	1 or 2	D102-H104-D171-N224-H328	NO_CLUS	Catalytic	Metallophos	3.6.1.10; 3.6.1.-; 3.6.1.11	hydrolase
YDL185W	NP_010096	VMA1	P17255	NP_010096.1 H(+)-transporting V1 sector ATPase subunit A [Saccharomyces cerevisiae S288c]	1	E363-H725-H736	clus_9_Sheet	Catalytic	Hom_end_hint	3.6.3.14; 3.1.-.-	hydrolase
YDR182W	NP_010468	CDC1	P40986	NP_010468.1 putative lipid phosphatase CDC1 [Saccharomyces cerevisiae S288c]	1 or 2	D95-D144-N183-H323	NO_CLUS	Catalytic	Metallophos	3.1.-.-	hydrolase
YLR361C	NP_013465	DCR2	Q05924	NP_013465.1 phosphoprotein phosphatase [Saccharomyces cerevisiae S288c]	1 or 2	D255-H257-D302-N337-H444-H498-H500	NO_CLUS	Catalytic	Metallophos	3.1.-.-	hydrolase
YKL149C	NP_012773	DBR1	P24309	NP_012773.1 RNA lariat debranching enzyme [Saccharomyces cerevisiae S288c]	1 or 2	H13-D40-H231	NO_CLUS	Catalytic	Metallophos	3.1.-.-	hydrolase
YNL217W	NP_014182	YNL217W	P40152	NP_014182.1 putative serine/threonine-protein phosphatase [Saccharomyces cerevisiae S288c]	1 or 2	D68-H70-D118-Q288	NO_CLUS	Catalytic	Metallophos	3.1.-.-	hydrolase
YIL039W	NP_012225	TED1	P40533	NP_012225.1 Ted1p [Saccharomyces cerevisiae S288c]	1 or 2	D133-N195-H315-H379	NO_CLUS	Catalytic	Metallophos
YOR137C	NP_014780	SIA1	Q12212	NP_014780.3 Sia1p [Saccharomyces cerevisiae S288c]	1 or 2	H319-D356-H550	NO_CLUS	Catalytic	Metallophos
YHR202W	NP_012072	YHR202W	P38887	NP_012072.3 hypothetical protein YHR202W [Saccharomyces cerevisiae S288c]	1 or 2	Unknown	NO_CLUS	Catalytic	Metallophos
YHR012W	NP_011876	VPS29	P38759	NP_011876.1 retromer subunit VPS29 [Saccharomyces cerevisiae S288c]	1	D8-H10-D46-Q229	clus_9_Sheet	Catalytic	Metallophos_2
YGL207W	NP_011308	SPT16	P32558	NP_011308.1 chromatin-remodeling protein SPT16 [Saccharomyces cerevisiae S288c]	from 1 to 4	Unknown	clus_9_Sheet	Catalytic	Peptidase_M24
YLR307W	NP_013410	CDA1	Q06702	NP_013410.1 chitin deacetylase CDA1 [Saccharomyces cerevisiae S288c]	1	D116-H162-H166	NO_CLUS	Catalytic	Polysacc_deac_1	3.5.1.41	hydrolase
YLR308W	NP_013411	CDA2	Q06703	NP_013411.1 chitin deacetylase CDA2 [Saccharomyces cerevisiae S288c]	1	D126-H172-H176	NO_CLUS	Catalytic	Polysacc_deac_1	3.5.1.41	hydrolase
YER010C	NP_010926	YER010C	P40011	NP_010926.3 bifunctional 4-hydroxy-4-methyl-2-oxoglutarate aldolase/oxaloacetate decarboxylase [Saccharomyces cerevisiae S288c]	1	Unknown	Unknown	Catalytic	RraA-like	4.1.3.17; 4.1.1.3	lyase
YKL165C	NP_012756	MCD4	P36051	NP_012756.1 mannose-ethanolamine phosphotransferase MCD4 [Saccharomyces cerevisiae S288c]	1	D62-T102-D271-H272	clus_9_Sheet	Catalytic	Sulfatase	2.-.-.-	transferase
YMR262W	NP_013989	YMR262W	P38430	NP_013989.2 putative endodeoxyribonuclease [Saccharomyces cerevisiae S288c]	2	D262	NO_CLUS	Catalytic	TatD_DNase	3.1.21.-	hydrolase
YMR105C	NP_013823	PGM2	P37012	NP_013823.1 phosphoglucomutase PGM2 [Saccharomyces cerevisiae S288c]	1	Unknown	Unknown	Unknown	Unknown	5.4.2.2	isomerase
YGR276C	NP_011792	RNH70	P53331	NP_011792.1 Rnh70p [Saccharomyces cerevisiae S288c]	1	Unknown	Unknown	Unknown	Unknown	3.1.-.-	hydrolase
YLR059C	NP_013160	REX2	P54964	NP_013160.1 Rex2p [Saccharomyces cerevisiae S288c]	1	Unknown	Unknown	Unknown	Unknown	3.1.-.-	hydrolase
YOL080C	NP_014561	REX4	Q08237	NP_014561.1 putative 3'-5' exonuclease [Saccharomyces cerevisiae S288c]	1	Unknown	Unknown	Unknown	Unknown	3.1.-.-	hydrolase
YDR236C	NP_010522	FMN1	Q03778	NP_010522.1 riboflavin kinase [Saccharomyces cerevisiae S288c]	1	Unknown	Unknown	Unknown	Unknown	2.7.1.26	transferase
YMR187C	NP_013912	YMR187C	Q03236	NP_013912.1 hypothetical protein YMR187C [Saccharomyces cerevisiae S288c]	1	C17-C12-H33-C37	Unknown	Unknown	Unknown
YOL029C	NP_014613	YOL029C	Q08187	NP_014613.1 hypothetical protein YOL029C [Saccharomyces cerevisiae S288c]	1	C64-C67-H72-C77	Unknown	Unknown	Unknown
YHL009W-A	NP_058134	YHL009W-A	Q6Q5P6	NP_058134.1 gag protein [Saccharomyces cerevisiae S288c]	1	C341-C344-C350-C354	Unknown	Unknown	Unknown
YMR006C	NP_013719	PLB2	Q03674	NP_013719.1 lysophospholipase [Saccharomyces cerevisiae S288c]	1	C553-C556-C574-C577	Unknown	Unknown	Unknown	3.1.1.5	hydrolase
YBL091C	NP_009462	MAP2	P38174	NP_009462.2 methionine aminopeptidase [Saccharomyces cerevisiae S288c]	1 or 2	D194-D205-H274-E307-E402	clus_9_Sheet	Catalytic	Peptidase_M24	3.4.11.18	hydrolase
YHR170W	NP_012040	NMD3	P38861	NP_012040.1 ribosome-binding protein NMD3 [Saccharomyces cerevisiae S288c]	1	C19-C22-C35-C38	Unknown	Unknown	NMD3
YDR492W	NP_010780	IZH1	Q03419	NP_010780.1 PAQR-type receptor [Saccharomyces cerevisiae S288c]	1	H139-H285-H289	clus_6_Helix	Catalytic	HlyIII
YLR023C	NP_013123	IZH3	Q07959	NP_013123.1 Izh3p [Saccharomyces cerevisiae S288c]	1	H316-H514-H518	clus_6_Helix	Catalytic	HlyIII
YOL002C	NP_014641	IZH2	Q12442	NP_014641.2 PAQR-type receptor [Saccharomyces cerevisiae S288c]	1	H136-H282-H286	clus_6_Helix	Catalytic	HlyIII
