# Supplementary material for: The cellular economy of the Saccharomyces cerevisiae zinc proteome
Source: Royal Society of Chemistry journal article supplement (doi:10.1039/c8mt00269j), 2018-01-01
Supplement: c8mt00269j4.xlsx [file c8mt00269j4.xlsx]

## Sheet: Copy Number
Gene names	Systematic Name	Full Name	Uniprot ID	Zn Protein?	Zap1 Protein?	Unique sequence coverage [%]	Log 2 LFQ intensity WT 0 hr 1	Log 2 LFQ intensity WT 0 hr 2	Log 2 LFQ intensity WT 0 hr 3	Log 2 LFQ intensity WT 0 hr 4	WT 0 CV (%)	Log 2 LFQ intensity WT 4 hr 1	Log 2 LFQ intensity WT 4 hr 2	Log 2 LFQ intensity WT 4 hr 3	Log 2 LFQ intensity WT 4 hr 4	CV WT 4 (%)	Log 2 LFQ intensity WT 8 hr 1	Log 2 LFQ intensity WT 8 hr 2	Log 2 LFQ intensity WT 8 hr 3	Log 2 LFQ intensity WT 8 hr 4	CV WT 8 (%)	Log 2 LFQ intensity WT 12 hr 1	Log 2 LFQ intensity WT 12 hr 2	Log 2 LFQ intensity WT 12 hr 3	Log 2 LFQ intensity WT 12 hr 4	CV WT 12 (%)	Log 2 LFQ intensity WT 16 hr 1	Log 2 LFQ intensity WT 16 hr 3	Log 2 LFQ intensity WT 16 hr 4	CV WT 16 (%)	Fold Change 4 hrs	p-value 4 hrs	Fold Change 8 hrs	p-value 8 hrs	Fold Change 12 hrs	p-value 12 hrs	Fold Change 16 hrs	p-value 16 hrs	Copy number WT 0 hr 1	Copy number WT 0 hr 2	Copy number WT 0 hr 3	Concentration [nM] WT 0 hr 4	Copy number WT 4 hr 1	Copy number WT 4 hr 2	Copy number WT 4 hr 3	Copy number WT 4 hr 4	Copy number WT 8 hr 1	Copy number WT 8 hr 2	Copy number WT 8 hr 3
ZRT3	YKL175W	Zinc-regulated transporter 3	P34240	Yes	Yes	22.1	26.9315	24.5492	26.4521	25.989	55.9561	28.8497	28.6652	28.31	28.4048	17.2137	29.9258	29.7142	29.4995	29.874	12.8651	30.0016	29.5777	29.9178	29.7584	12.695	29.8857	29.7973	30.0874	10.4796	2.57698	0.00278786	3.77292	0.000360457	3.83344	0.000328968	3.94303	0.001348	1032.88	198.118	740.874	36.3972	3903.86	3435.16	2685.53	2868	8230.59	7107.89	6124.97
ZRT1	YGL255W	Zinc-regulated transporter 1	P32804	Yes	Yes	26.1	31.1585	31.3649	31.6869	31.1256	18.7274	32.4264	33.0005	33.0051	32.9179	17.4335	33.1335	33.2608	33.2032	33.1036	4.91911	32.7985	33.3055	32.9696	32.9544	15.4259	32.5424	33.4467	33.1786	29.9014	1.50349	0.000211555	1.84131	9.1373e-06	1.67303	5.82018e-05	1.7219	0.00143484	25772.3	29735.7	37170.9	1705.97	62060.5	92391.8	92690.7	87251.1	101314	110663	106333
ZRC1	YMR243C	Zinc/cadmium resistance protein	P20107	Yes	Yes	24.9	29.9765	30.3008	29.5278	29.9477	21.4061	30.451	30.3619	30.3713	30.468	3.7591	31.0281	31.1584	31.2757	31.0938	7.39523	31.1942	31.061	31.1558	31.169	3.97001	31.3104	31.1998	31.2604	3.83079	0.474842	0.0255143	1.20077	0.000366625	1.20677	0.000293004	1.31866	0.000940649	9769.78	12232.6	7158.46	648.544	13574.5	12761.6	12844.8	13735.4	20250.7	22165.1	24042.5
ZPS1	YOL154W	Protein ZPS1	Q12512	Yes	Yes	41.8	33.6369	30.7732	31.7291	30.8276	106.879	34.2091	34.2212	34.2081	34.0973	3.94445	34.8028	35.0827	34.7529	34.8915	10.3559	35.1859	35.2871	35.2085	35.125	4.66438	35.6054	35.6083	35.6011	0.253332	2.44224	0.0107196	3.14078	0.00343291	3.45991	0.00207878	3.86324	0.0045416	216630	29762.5	57732.8	2093.02	322098	324807	321855	298079	486051	590157	469540
ZPR1	YGR211W	Zinc finger protein ZPR1	P53303	Yes	No	46.1	28.9166	29.6494	29.0972	29.3688	22.4973	28.6508	29.3839	29.0023	29.1482	20.6409	28.9179	28.7444	29.0419	28.9207	8.36865	28.7743	28.5953	28.5459	28.9225	12.1234	28.4701	28.7019	28.5952	8.00867	-0.21172	0.376747	-0.351823	0.0860198	-0.548527	0.023549	-0.668964	0.0195678	4113.89	6836.59	4662.46	381.153	3421.54	5687.25	4365.56	4830.26	4117.38	3650.81	4486.93
ZIM17	YNL310C	Mitochondrial protein import protein ZIM17	P42844	Yes	No	32.8	25.6298	26.2006			27.6192	25.9642	26.0727	25.8491	26.3764	16.3229															0.150404	0.5705							1169.11	1736.58			1474.09	1589.27	1361.08	1961.56
ZAP1	YJL056C	Zinc-responsive transcriptional regulator ZAP1	P47043	Yes	Yes	17.8		25.6516	24.546		51.6807	26.6338	25.0261	26.4063	26.4877	39.1086	25.8314	25.5759		25.7385	8.85086		25.6875	25.4543	24.9684	24.1802	25.0612	25.4009	24.2708	36.5675	1.03965	0.187595	0.616448	0.241199	0.271256	0.621503	-0.18783	0.773703		238.369	110.777		470.904	154.512	402.197	425.536	270.007	226.181
YTA12	YMR089C	Mitochondrial respiratory chain complexes assembly protein YTA12	P40341	Yes	No	24	26.6941	27.756	27.4356	27.6297	28.5893	27.7653	27.1775	27.5813	27.2207	19.8886	27.7243	27.75	27.8172	27.5655	7.2263	27.6371	27.7793	27.6821	27.7301	4.25046	27.3739	27.4201	27.3625	2.12202	0.0573907	0.842661	0.335422	0.217505	0.328354	0.219518	0.00668302	0.981977	520.407	1086.45	870.078	67.4125	1093.54	727.573	962.588	749.67	1062.86	1081.94	1133.56
YSH1	YLR277C	Endoribonuclease YSH1	Q06224	Yes	No	6.8								24.5246	24.5634	1.90481		23.8451							23.9611																				123.073	126.433		76.8453
YME1	YPR024W	Mitochondrial inner membrane i-AAA protease supercomplex subunit YME1	P32795	Yes	No	37.9	27.3885	28.1434	27.8361	27.7863	20.9587	27.6865	27.7124	27.9223	27.9477	9.46109	27.3427	27.7707	27.0934	27.7091	21.3655	27.8701	27.7556	27.4998	27.7327	10.4477	27.7263	27.5408	27.4413	10.1566	0.0286397	0.871297	-0.309628	0.213257	-0.0740431	0.684172	-0.219128	0.314897	960.664	1621.1	1310.1	85.7129	1181.06	1202.44	1390.75	1415.46	930.646	1252.03	782.911
YIL108W	YIL108W	Putative zinc metalloproteinase YIL108W	P40483	Yes	No	45.7	30.2248	31.15	29.652	29.5305	56.5539	29.474	30.2919	30.6008	30.6694	32.3638	30.5268	30.096	30.4161	30.3653	12.1944	30.5374	30.6348	30.8093	30.8859	10.9785	30.534	30.3946	30.1899	11.8416	0.119692	0.803419	0.211703	0.598069	0.577522	0.17724	0.23349	0.622167	7247.02	13761.7	4872.28	303.307	4306.74	7591.81	9404.72	9862.72	8934.6	6627.89	8274.47
YHR020W	YHR020W	Putative proline--tRNA ligase YHR020W	P38708	Yes	No	70.9	33.2695	33.2993	33.3217	33.1982	3.68586	32.5036	32.6059	32.5586	32.5638	2.9019	32.248	32.1006	32.2848	32.2609	5.62854	32.1002	32.3226	32.3356	32.2108	7.50936	32.016	32.183	32.0833	5.8504	-0.714217	7.72477e-07	-1.04858	7.30395e-07	-1.02987	2.82582e-06	-1.17805	2.98142e-06	59820.5	61068.5	62027.5	3855.99	35179.4	37766	36546.9	36678.6	29468.9	26606.7	30230.3
YGL101W	YGL101W	HD domain-containing protein YGL101W	P53144	Yes	No	37.7	26.2317	26.3623	26.4972		9.197			26.6468														26.3073			0.283059						-0.0563962		1392.73	1524.61	1674.06				1856.99
YDR266C	YDR266C	LIM domain and RING finger protein YDR266C	Q05580	Yes	No	21.3	27.605	27.651	27.7466	27.8245	6.8392	27.4063	27.0309	26.6085	26.6411	27.0951	26.8335	27.4244	27.0164	26.7877	21.3947	26.8088	26.8389	26.7261	27.102	11.7201	26.5475	26.5303	26.4949	1.85348	-0.785043	0.0067819	-0.691263	0.00403331	-0.837786	0.000117581	-1.18253	5.96561e-06	1254.48	1295.1	1383.84	98.9191	1093.11	842.63	628.777	643.157	734.904	1106.87	834.211
YDJ1	YNL064C	Mitochondrial protein import protein MAS5	P25491	Yes	No	56	31.2852	31.4676	31.4583	31.3503	6.05555	30.9275	30.8795	30.8518	30.7498	5.13383	30.7753	30.6834	30.9682	30.9348	9.22357	30.488	30.5197	30.5914	30.5998	3.77739	30.4408	30.3597	30.26	6.25489	-0.538209	8.71125e-05	-0.549921	0.000476674	-0.840624	3.48332e-06	-1.03682	2.20219e-05	26192.1	29722.2	29530	1855.68	20440	19771.4	19395.1	18071.9	18393.2	17259.2	21025.5
YBL029C-A	YBL029C-A	UPF0768 protein YBL029C-A	Q3E756	Yes	No	23.4
VPS27	YNR006W	Vacuolar protein sorting-associated protein 27	P40343	Yes	No	16.9	25.9869	26.8668	25.9165	26.5586	32.0254	26.7623	26.5393	26.3663		13.8457	26.959	26.9024	26.7112		8.80555	26.5792	26.9854	26.9988	26.9849	13.2097	26.6641	26.8515	26.7249	6.69379	0.223772	0.471429	0.525374	0.117479	0.554902	0.0690255	0.414667	0.191724	418.916	770.932	398.972	42.1677	717.071	614.358	544.944		821.832	790.209	692.125
VMS1	YDR049W	Protein VMS1	Q04311	Yes	No	14.4	27.1745	28.0051		27.8409	27.8774																		27.5981								-0.0753877		931.095	1655.96		100.081
VID22	YLR373C	Vacuolar import and degradation protein 22	Q05934	Yes	No	9.4
UTP23	YOR004W	rRNA-processing protein UTP23	Q12339	Yes	No	17.7
URA4	YLR420W	Dihydroorotase	P20051	Yes	No	67.3	31.069	31.0038	31.2373	30.5676	18.5003	30.0133	30.2223	30.1731	30.3125	8.54248	29.8097	29.5339	30.3188	29.9187	23.1799	29.6689	29.6245	29.6863	29.5713	3.53671	29.149	29.5419	29.6593	17.6598	-0.789145	0.00230203	-1.07414	0.00254482	-1.33166	9.3797e-05	-1.51935	0.000831692	24983.7	23879.1	28074.7	1195.27	12018.8	13892	13426.2	14788.2	10436.9	8620.81	14853.6
UME6	YDR207C	Transcriptional regulatory protein UME6	P39001	Yes	No	26.9																					27.8315
ULS1	YOR191W	ATP-dependent helicase ULS1	Q08562	Yes	No	9.1				27.6716		27.5859							27.8841						28.0029		27.6301	27.48	28.659	48.0385	-0.0856335		0.212525		0.331318		0.251465					35.1025	488.457						600.595
UBR1	YGR184C	E3 ubiquitin-protein ligase UBR1	P19812	Yes	No	5.3	27.0952		26.8775	26.1878	30.0329		26.8181	27.2436		20.7059	27.4504		27.5917		6.91944	26.1177	26.7349	26.4359		21.2049	26.8115				0.310738	0.480801	0.800924	0.1106	-0.290635	0.423613	0.0913806		285.091		245.162	10.2935		235.279	315.992		364.691		402.214
UBP14	YBR058C	Ubiquitin carboxyl-terminal hydrolase 14	P38237	Yes	No	12.5		27.159	26.2258	26.7205	31.6442	26.0661	26.095	26.0169	26.3519	10.8365	26.0128					25.8441			26.1234	13.6475			25.435		-0.569326	0.065597	-0.688997		-0.718089	0.142478	-1.26679			755.977	395.902	37.7775	354.41	361.579	342.515	432.051	341.552
UBP10	YNL186W	Ubiquitin carboxyl-terminal hydrolase 10	P53874	Yes	No	19.9	27.3125	27.9804	27.8205		22.6981			26.1677			27.5616		27.5359		1.2605	27.0218		27.0319	27.1932	6.78762			27.1696		-1.53674		-0.155739	0.59153	-0.622162	0.0407826	-0.53487		841.767	1337.34	1197.05				380.694		1000.39		982.718
UBP1	YDL122W	Ubiquitin carboxyl-terminal hydrolase 1	P25037	Yes	No	31.1	27.6991	27.9206	28.2613	27.7712	18.2072	27.6956	27.6023	27.4784	27.689	6.88131	27.7641	28.0075	27.8588	27.9866	7.82729	27.699	27.7992	28.2595	27.715	19.8145	27.243	27.4947	27.4853	9.59339	-0.296725	0.0699784	-0.00883255	0.950817	-0.0448726	0.813416	-0.5054	0.0268803	1050.17	1224.44	1550.62	74.7656	1047.66	982.018	901.196	1042.84	1098.55	1300.44	1173.06
UBA4	YHR111W	Adenylyltransferase and sulfurtransferase UBA4;Adenylyltransferase UBA4;Sulfurtransferase UBA4	P38820	Yes	No	32.5	26.185	26.0581	26.8377	26.369	25.2505	26.3292	26.1061	26.0844	26.2167	7.92511	26.8263	27.0901	27.1839	27.1588	10.8104	26.8376	27.2966	27.0798	26.9218	14.3221	26.7112	26.9973	26.6542	13.1289	-0.178359	0.359654	0.702319	0.00999837	0.671502	0.0147659	0.425121	0.112083	690.998	632.848	1086.37	53.1615	763.667	654.242	644.46	706.342	1077.77	1294.06	1380.93
UBA2	YDR390C	Ubiquitin-activating enzyme E1-like	P52488	Yes	No	29.2	26.7793	27.687	26.4057	27.5171	39.643	27.0081	26.7818	27.0878	27.0894	9.6354	27.1559	26.9248	27.7955	27.2115	27.6754	26.9056	27.1068	27.0613	27.0011	5.95918	26.7074	27.0703	26.9567	12.5544	-0.105507	0.746593	0.174632	0.640566	-0.0785846	0.80611	-0.185811	0.63671	722.674	1355.75	557.791	81.617	846.842	723.929	894.966	895.97	938.196	799.346	1461.66
TY2B-LR1;TY2B-GR1	TY2B-LR1;TY2B-GR1	Transposon Ty2-LR1 Gag-Pol polyprotein;Capsid protein;Ty2 protease;Integrase;Reverse transcriptase/ribonuclease H;Transposon Ty2-GR1 Gag-Pol polyprotein;Capsid protein;Ty2 protease;Integrase;Reverse transcriptase/ribonuclease H	P0C2J3	Yes	No	0	27.8982	25.4682	26.7023		77.1393	29.2547	30.1521	29.7025	29.6237	25.9837	29.8012	29.6214	29.6232	29.6874	5.9584	29.7272	29.514	29.3277	29.7545	13.5075	29.5168	29.8729	29.6288	12.8614	2.99369	0.0049638	2.99376	0.0038263	2.89131	0.00476051	2.98328	0.0136321	553.315	102.68	241.531		1416.89	2639.16	1932.56	1829.81	2069.37	1826.98	1829.14
TY1B-PR3	TY1B-PR3	Transposon Ty1-PR3 Gag-Pol polyprotein;Capsid protein;Ty1 protease;Integrase;Reverse transcriptase/ribonuclease H	P0C2J1	Yes	No	0
TY1B-PR2;TY1B-DR5;TY1B-H;TY1B-DR1	TY1B-PR2;TY1B-DR5;TY1B-H;TY1B-DR1	Transposon Ty1-PR2 Gag-Pol polyprotein;Capsid protein;Ty1 protease;Integrase;Reverse transcriptase/ribonuclease H;Transposon Ty1-DR5 Gag-Pol polyprotein;Capsid protein;Ty1 protease;Integrase;Reverse transcriptase/ribonuclease H;Transposon Ty1-H Gag-Pol polyprotein;Capsid protein;Ty1 protease;Integrase;Reverse transcriptase/ribonuclease H;Transposon Ty1-DR1 Gag-Pol polyprotein;Capsid protein;Ty1 p…	P0C2J0	Yes	No	0	26.4872	27.3842	27.6569	27.9199	36.947	27.6225	26.9606	27.4748	27.4147	18.3541	27.4225					27.7478	27.3971	27.3116	26.9622	22.3202	28.1593	27.6146	28.105	19.4719	0.00608204	0.986411	0.0604071		-0.00735369	0.983952	0.597594	0.191647	211.728	394.268	476.309	38.7076	465.1	293.951	419.815	402.686	404.869
TY1B-OL	TY1B-OL	Transposon Ty1-OL Gag-Pol polyprotein;Capsid protein;Ty1 protease;Integrase;Reverse transcriptase/ribonuclease H	Q12273	Yes	No	0
TY1B-NL1	TY1B-NL1	Transposon Ty1-NL1 Gag-Pol polyprotein;Capsid protein;Ty1 protease;Integrase;Reverse transcriptase/ribonuclease H	Q12112	Yes	No	0
TY1B-MR1;TY1B-BL	TY1B-MR1;TY1B-BL	Transposon Ty1-MR1 Gag-Pol polyprotein;Capsid protein;Ty1 protease;Integrase;Reverse transcriptase/ribonuclease H;Transposon Ty1-BL Gag-Pol polyprotein;Capsid protein;Ty1 protease;Integrase;Reverse transcriptase/ribonuclease H	Q04214	Yes	No	0	26.5968	27.0188	27.337	26.6947	23.9673	26.7212	26.8803	26.3245	26.375	18.7539	25.5466														-0.33657	0.168908	-1.36518						228.133	305.66	381.075	16.5351	248.678	277.675	188.897	195.633	110.171
TY1B-ML2;TY1B-JR1	TY1B-ML2;TY1B-JR1	Transposon Ty1-ML2 Gag-Pol polyprotein;Capsid protein;Ty1 protease;Integrase;Reverse transcriptase/ribonuclease H;Transposon Ty1-JR1 Gag-Pol polyprotein;Capsid protein;Ty1 protease;Integrase;Reverse transcriptase/ribonuclease H	Q03434	Yes	No	1				23.3737				22.879	23.4063	25.5566	24.23					24.9951			24.3196	32.5161	24.8928	23.3707	24.1144	51.2846	-0.23106		0.856291		1.28365		0.752251					1.65733			17.3686	25.0307	44.3041
TY1B-ML1	TY1B-ML1	Transposon Ty1-ML1 Gag-Pol polyprotein;Capsid protein;Ty1 protease;Integrase;Reverse transcriptase/ribonuclease H	Q04711	Yes	No	0							25.5084																															107.492
TY1B-JR2	TY1B-JR2	Transposon Ty1-JR2 Gag-Pol polyprotein;Capsid protein;Ty1 protease;Integrase;Reverse transcriptase/ribonuclease H	P47100	Yes	No	0	32.5298	32.6908	32.4008	32.6154	8.51872	32.5084	32.6803	32.6576	32.6072	5.2107	32.092	32.068	32.0778	32.1266	1.78791	32.1054	32.2455	32.1981	32.3522	7.13788	32.5683	32.191	32.282	14.0144	0.054222	0.485622	-0.468097	0.000319934	-0.333873	0.00608122	-0.21206	0.138093	13957.8	15605.5	12763.6	1003.05	13752.7	15493.2	15250.8	14727.4	10304.6	10134.2	10203.3
TY1B-DR3	TY1B-DR3	Transposon Ty1-DR3 Gag-Pol polyprotein;Capsid protein;Ty1 protease;Integrase;Reverse transcriptase/ribonuclease H	Q99231	Yes	No	0
TY1B-BR	TY1B-BR	Transposon Ty1-BR Gag-Pol polyprotein;Capsid protein;Ty1 protease;Integrase;Reverse transcriptase/ribonuclease H	Q12193	Yes	No	0								26.3781																															196.072
TRZ1	YKR079C	Ribonuclease Z	P36159	Yes	No	5.7	27.4585		27.459	27.1147	13.1831		26.5369										27.7007	27.9933	27.995	11.3229					-0.807126				0.552306	0.0215102			851.702		851.979	45.448		449.639
TRM112	YNR046W	Multifunctional methyltransferase subunit TRM112	P53738	Yes	No	34.8	25.9611	26.8953	26.9663	26.5933	28.1996	25.8133	26.0718	26.062	26.4944	20.3966	26.0046			25.8852	5.84849		26.121		26.0862	1.70524	25.5499	26.3264	26.4231	29.695	-0.493633	0.116299	-0.659154	0.129073	-0.50041	0.21915	-0.504221	0.216113	1938.54	3704.12	3891.08	203.483	1749.8	2093.09	2078.93	2805.54	1997.8
TMA46	YOR091W	Translation machinery-associated protein 46	Q12000	Yes	No	45.2	26.4524	26.3047	27.7789	26.8492	51.6058	26.8989	25.4818	26.018	25.7361	47.5851	26.5767		26.5328	25.9996	20.7156	26.8348		26.2919	26.7086	18.7171		26.2541	26.6752	20.4958	-0.81263	0.122851	-0.476615	0.309743	-0.234514	0.596855	-0.381682	0.498695	1038.98	937.863	2605.8	92.6419	1415.82	530.19	768.842	632.386	1132.5		1098.52
TMA108	YIL137C	Protein TMA108	P40462	Yes	No	37.4	30.8448	31.3294	31.1771	31.2062	13.6392	31.2479	31.704	31.64	31.4792	13.6114	31.5428	31.4471	31.6597	31.6875	7.59511	31.4965	31.5905	31.6217	31.6719	5.06205	31.2573	31.7513	31.4402	17.6112	0.378377	0.0402609	0.444867	0.00910834	0.455767	0.00604679	0.343547	0.10225	8004.28	11199.3	10077.5	696.385	10584.2	14520.2	13889.3	12424.6	12984.9	12151.5	14080.2
TIS11	YLR136C	mRNA decay factor CTH2	P47977	Yes	Yes	21.1						26.9027	26.328	26.2805	26.2189	24.077																											1735.85	1165.51	1127.77	1080.65
TIM9	YEL020W-A	Mitochondrial import inner membrane translocase subunit TIM9	O74700	Yes	No	74.7	28.8124	28.4447	29.1218	28.6245	20.5418	28.7221	28.7041	28.474	28.7768	8.90939	28.7721	28.7772	28.9185	29.1557	12.9346	28.4236	28.8344	28.4195	28.3948	15.667	28.5119	28.6127	28.2266	13.4424	-0.0815729	0.627064	0.155021	0.397838	-0.232782	0.241431	-0.300462	0.186991	20659.1	16011.2	25601.2	1228.2	19406.2	19165.6	16339.8	20155.6	20090.3	20160.4	22236.4
TIM8	YJR135W-A	Mitochondrial import inner membrane translocase subunit TIM8	P57744	Yes	No	79.3	27.6446	27.9247	27.4314	27.6011	14.5594	27.9498	28.3059	28.2633	28.215	10.5742	28.0313	28.2147	28.263	28.3112	8.22295	28.0995	28.0651	28.6444	28.0191	22.2273	28.1503	27.9825	28.251	9.28379	0.533068	0.00633947	0.5546	0.00349558	0.556576	0.0208129	0.477468	0.0178796	9608.32	11666.6	8288.17	631.349	11871.8	15195.3	14753.4	14267.6	12561.8	14264.3	14750.2
TIM13	YGR181W	Mitochondrial import inner membrane translocase subunit TIM13	P53299	Yes	No	66.7	27.9909	27.6998	27.713	27.6143	11.8263	27.4155	27.973	27.5975	28.0849	21.3681	27.6186	27.8148	27.0268	27.771	22.4529	27.8784	27.9125	27.4593	27.7269	13.6612	28.0037	28.0002	27.9813	0.835174	0.0132548	0.942743	-0.196694	0.362183	-0.0102398	0.940542	0.24057	0.0557446	10567.3	8636.05	8715.68	551.213	7091.86	10436.6	8045.39	11278.8	8163.84	9353.08	5416.55
TIM10	YHR005C-A	Mitochondrial import inner membrane translocase subunit TIM10	P87108	Yes	No	94.6	26.8077	27.644	27.7686	28.2169	36.794	27.8193	27.1631	27.2159	27.5326	21.7561	27.6682	27.4301	27.9191	27.7219	13.7894	27.7303	27.6353	27.6464	27.2741	13.1871	26.9361	27.1563	27.5458	21.8666	-0.176589	0.613228	0.0755381	0.816112	-0.037794	0.907284	-0.396558	0.342941	5096.57	9099.37	9920.67	916.695	10275.6	6520.07	6763.03	8423.42	9253.83	7845.95	11011.4
TIF35	YDR429C	Eukaryotic translation initiation factor 3 subunit G	Q04067	Yes	No	70.8	30.4654	30.8198	30.7182	30.5755	10.7774	30.0081	29.9372	29.9235	30.046	4.04449	30.0208	29.9195	29.841	29.8843	5.38039	29.8981	29.8226	29.7852	29.7349	4.79096	29.7301	29.7798	29.4937	10.2918	-0.666014	0.000203312	-0.728306	0.000156957	-0.834531	6.52878e-05	-0.976837	0.000422834	21731	27781.9	25892.5	1588.42	15828.1	15068.8	14926.6	16248.8	15967.3	14885.5	14096.9
THS1	YIL078W	Threonine--tRNA ligase, cytoplasmic	P04801	Yes	No	73.3	33.1888	33.3447	33.3881	33.1905	7.18774	32.8065	32.8562	32.9195	32.9145	3.68237	32.8386	32.535	32.6648	32.6623	8.74488	32.6024	32.6063	32.6143	32.7197	3.97208	32.3307	32.6441	32.4583	11.0145	-0.403838	0.000446889	-0.602851	0.000303995	-0.642332	3.53102e-05	-0.800332	0.000441219	51793.6	57701.8	59463.4	3511.71	39737.5	41127.6	42974.9	42823.6	40631.4	32918.8	36017.6
TFB3	YDR460W	RNA polymerase II transcription factor B subunit 3	Q03290	Yes	No	17.8																	25.0613
TFA1	YKL028W	Transcription initiation factor IIE subunit alpha	P36100	Yes	No	15.6	25.3116	25.4618			7.35444	25.1152	25.253	25.2299	25.1625	4.34945	25.4823		25.509	25.2152	10.8832		25.2837	25.571	25.734	15.427	25.8148	26.0284		10.4493	-0.196582	0.0406872	0.0154379	0.915174	0.142857	0.483013	0.534832	0.0547369	340.133	377.45			296.829	326.575	321.405	306.736	382.849		389.987
TEA1	YOR337W	TY1 enhancer activator	P47988	Yes	No	5.8
TAF1	YGR274C	Transcription initiation factor TFIID subunit 1	P46677	Yes	No	9.7			25.1368																																136.662
SWI1	YPL016W	SWI/SNF chromatin-remodeling complex subunit SWI1	P09547	Yes	No	5.6												28.9744				29.1494		29.0065		7.00046	28.9833	28.3861	28.7325	20.3392																		1593.99
SUI3	YPL237W	Eukaryotic translation initiation factor 2 subunit beta	P09064	Yes	No	79.3	31.0038	30.7729	31.1043	30.4783	18.494	29.8359	30.0705	30.1666	29.9289	10.1702	29.7271	29.5394	29.793	29.7451	7.47354	29.7878	29.6762	29.8445	29.904	6.64303	29.5858	29.6688	29.5376	4.62432	-0.839346	0.00176563	-1.13869	0.00026977	-1.03673	0.000410791	-1.24243	0.000703921	30489.7	25979.7	32688.8	1434.42	13570	15965.6	17065.9	14473.1	12584	11048.9	13171.7
SUA7	YPR086W	Transcription initiation factor IIB	P29055	Yes	No	52.2	27.1774	27.0772	27.3316	27.1097	8.02604	26.9094	26.6604	26.9442	26.7382	9.35444	27.2099	27.2679	27.264	27.1538	3.69251	27.1548	27.3547	27.0737	27.217	8.32708	27.0733	27.2013	27.3656	10.2074	-0.360918	0.00647704	0.0499436	0.455259	0.0260597	0.761244	0.0394269	0.702334	1776.44	1657.29	1976.81	114.788	1475.29	1241.45	1511.34	1310.15	1816.93	1891.49	1886.34
STE24	YJR117W	CAAX prenyl protease 1	P47154	Yes	No	30.5	27.9596	28.3441	28.5383	28.1569	17.148	27.6962	28.8562	28.6283	28.6721	30.2344	28.8968	28.1915	29.0003	28.4377	25.6473	28.2361	28.4028	28.7251	28.5871	14.6749	28.0842	28.4886	27.8778	22.0931	0.213427	0.487327	0.381822	0.144705	0.238008	0.196292	-0.0995173	0.655588	2230.39	2911.67	3331.22	173.188	1858.17	4152.22	3545.44	3654.82	4270.82	2619.26	4588.52
STE23	YLR389C	A-factor-processing enzyme	Q06010	Yes	No	36.7	28.1665	28.3071	28.0754	27.475	22.7829	27.8991	27.7582	27.9202	27.912	5.17227	27.8239	27.4682	28.3536	27.774	26.8011	28.1628	27.8765	28.055	28.091	8.22291	28.0835	28.3904	28.0225	14.1023	-0.133609	0.502351	-0.151077	0.581846	0.040332	0.841504	0.159485	0.530631	1145.57	1262.88	1075.49	48.039	951.795	863.236	965.788	960.313	903.428	706.004	1304.21
SSM4	YIL030C	ERAD-associated E3 ubiquitin-protein ligase DOA10	P40318	Yes	No	9.8	26.3227	26.2156		26.6237	15.0616		26.8866		25.7631	52.4427		26.3321	26.0137		15.544		26.2056		26.1635	2.06549	27.009	26.154	25.915	42.3957	-0.0624976	0.89776	-0.21441	0.356803	-0.202786	0.290681	-0.0279573	0.940817	247.778	230.039		20.672		366.266		168.107		249.395	200.001
SSL1	YLR005W	Suppressor of stem-loop protein 1	Q04673	Yes	No	10.6							28.5043											28.7153			28.4123	28.96		26.5257														3255.6
SPT4	YGR063C	Transcription elongation factor SPT4	P32914	Yes	No	49	26.7062		26.8169	26.147	23.0926	25.6063	26.1804	26.0894	26.1064	16.6306	25.9205	26.2987	26.3243	25.7846	18.4563	25.6157	26.108	25.9356	26.1953	16.8539	25.8786	25.7672		5.45792	-0.561077	0.0608951	-0.474656	0.100673	-0.593016	0.0496813	-0.733772	0.0732371	4387.2		4737	201.634	2046.78	3047.2	2860.87	2894.81	2544.93	3307.53	3366.75
SOD1	YJR104C	Superoxide dismutase [Cu-Zn]	P00445	Yes	No	99.4	32.2686	32.0563	32.5893	32.6705	19.2785	32.7444	32.4493	32.7422	32.6987	9.33001	32.5879	32.5158	32.3429	32.6118	8.17197	32.2994	32.4411	32.5355	32.2248	9.69002	32.2368	32.0136	32.1938	8.0352	0.262491	0.150286	0.118427	0.474085	-0.0210001	0.899144	-0.248097	0.222774	145908	125939	182225	13055.9	202918	165377	202608	196579	182047	173178	153618
SIZ1	YDR409W	E3 SUMO-protein ligase SIZ1	Q04195	Yes	No	6.4								26.1518										27.3619	26.3578	47.3221		24.7416																	330.714
SGF73	YGL066W	SAGA-associated factor 73	P53165	Yes	No	12.8	24.9157		24.5228		19.1384	24.8173	25.168		24.8463	13.9617	25.0233	25.391	25.143	25.1175	11.2606	25.525	25.9008	25.667	25.2002	19.823	25.5898	25.311	25.627	11.5522	0.22465	0.355506	0.449496	0.0557348	0.854039	0.0270518	0.790045	0.0270668	194.164		147.876		181.366	231.28		185.047	209.207	269.936	227.311
SGF11	YPL047W	SAGA-associated factor 11	Q03067	Yes	No	26.3																						25.0679
SFP1	YLR403W	Transcription factor SFP1	P32432	Yes	No	14.1	23.088					22.7575		24.277		68.2778		23.2792		22.9201	17.5106				23.8685		25.5398	24.6618	25.4394	29.8088	0.429247		0.0116502		0.780506		2.12563		53.3064				42.3921		121.536			60.8608
SFB3	YHR098C	SED5-binding protein 3	P38810	Yes	No	39.5	31.6339	32.2786	32.0456	31.9579	18.0599	31.9911	32.5105	32.214	32.2203	15.0016	32.1455	31.9758	32.0985	32.3979	12.668	31.977	32.0374	32.1093	32.2098	6.99904	32.3387	32.4254	31.8825	19.0414	0.254984	0.185927	0.175411	0.315673	0.104369	0.491698	0.236511	0.314575	14332.4	22408.5	19066.1	1215.07	18359.9	26315.5	21427	21520.3	20433.4	18165.5	19777.9
SFB2	YNL049C	SED5-binding protein 2	P53953	Yes	No	24.5	30.8125	31.174	31.0235	30.9347	10.6104	31.4196	31.6308	31.7115	31.8066	11.1136	32.5266	32.1416	32.4222	32.8576	20.708	31.6248	32.0285		31.7527	14.6045	28.8343	30.6537	29.5819	63.2582	0.655982	0.00110393	1.50085	0.000103678	0.81582	0.00174858	-1.29621	0.0347842	8521	10948	9863.52	628.078	12979.7	15026.2	15890.6	16973.3	27958.4	21409.8	26006.3
SFA1	YDL168W	S-(hydroxymethyl)glutathione dehydrogenase	P32771	Yes	No	40.4	29.9571	30.0822	30.1359	30.0597	5.12939	29.7748	30.0124	29.8893	29.8034	7.52018	30.0637	29.7655	30.1009	30.1092	10.7459	29.3719	29.8745	29.9821	29.8123	17.191	29.353	29.6339	29.4725	9.82961	-0.188745	0.0274778	-0.0489142	0.607121	-0.298555	0.0757007	-0.572221	0.000891144	11354.4	12382.7	12852.2	825.605	10006.7	11797.7	10833.2	10206.5	12224.8	9941.91	12543.9
SET5	YHR207C	Putative protein lysine methyltransferase SET5	P38890	Yes	No	8.6	25.4996						25.5413	25.2623		13.6312		25.9246	25.6644		12.7192	25.729	25.1765		25.4285	19.2414	25.1694	25.3774		10.1766	-0.0977983		0.294827		-0.0549729		-0.226198		350.316					360.588	297.186			470.303	392.687
SET3	YKR029C	SET domain-containing protein 3	P36124	Yes	No	10.9	23.611													23.9545		24.0053	23.8655	23.5195	24.0409	15.4718	23.7713	23.2587	23.6173	17.5529			0.343477		0.246829		-0.061895		67.0126
SET2	YJL168C	Histone-lysine N-methyltransferase, H3 lysine-36 specific	P46995	Yes	No	12.6	26.6096		26.4488		7.87525																												542.06		484.874
SEC24	YIL109C	Protein transport protein SEC24	P40482	Yes	No	38.6	30.3257	30.3844	30.4526	30.1369	9.14023	30.6312	30.9185	30.8507	30.8779	8.56903	31.0452	30.8441	30.9689	30.9821	5.74552	30.8716	30.7878	30.8151	30.921	4.1348	30.6286	30.9045	30.7733	9.53354	0.494665	0.00184275	0.63517	0.000209604	0.52398	0.000399289	0.443923	0.00805332	5805.79	6046.96	6339.48	344.945	7175.16	8755.93	8353.84	8513.04	9559.69	8315.87	9067.43
SEC23	YPR181C	Protein transport protein SEC23	P15303	Yes	No	56.2	31.1388	31.3988	31.3121	31.2341	7.66623	31.3257	31.1847	31.3949	31.3384	6.06883	31.3947	31.424	31.4493	31.4352	1.60032	31.1066	31.2174	31.3867	31.1291	9.05256	31.2382	31.2897	31.1284	5.65215	0.0399883	0.59473	0.154869	0.0339786	-0.0610105	0.496759	-0.0521914	0.526521	12380.1	14825.5	13961	895.683	14092.9	12780.7	14785.7	14217.5	14783.6	15086.8	15353.8
SEA4	YBL104C	SEH-associated protein 4	P38164	Yes	No	5.2	24.5492		25.0225		22.9934																	25.1154									0.329528		93.3109		129.544
SCJ1	YMR214W	DnaJ-related protein SCJ1	P25303	Yes	No	44.3	27.0723	27.6331	28.0389	28.3409	35.5438	28.106	28.128	28.2131	28.0413	4.94237	27.9877	28.0135	28.4003	28.0379	14.3497	28.0759	26.6299	27.1514	27.2935	43.6161	26.4348	26.7369	26.8919	15.6685	0.35081	0.251833	0.338528	0.289126	-0.483614	0.278368	-1.08345	0.0252773	1518.76	2240.26	2967.89	247.792	3109.2	3156.98	3348.87	2972.95	2864.47	2916.02	3812.72
SAN1	YDR143C	Protein SAN1	P22470	Yes	No	16.9	24.4556		25.88		64.6483																												156.763		420.773
RTR1	YER139C	RNA polymerase II subunit B1 CTD phosphatase RTR1	P40084	Yes	No	39.4									25.8225		25.8512																													1011.09	1031.46
RSC8	YFR037C	Chromatin structure-remodeling complex protein RSC8	P43609	Yes	No	47.6	28.7762	29.2822	28.8279	28.7922	18.1447	29.0387	28.9509	28.6798	28.7399	11.8027	29.2585	29.2492	28.9301	29.0093	11.4955	29.174	29.2006	28.9729	29.3995	12.0812	29.0416	28.9441	28.8246	7.49999	-0.0672882	0.665727	0.192153	0.240012	0.267113	0.124087	0.0171497	0.915033	3253.95	4620.78	3372.72	222.82	3903.22	3672.9	3043.6	3173.12	4545.68	4516.31	3620.24
RSC3	YDR303C	Chromatin structure-remodeling complex protein RSC3	Q06639	Yes	No	27.9	27.7987		27.8667	28.9179	47.149	29.201	28.9745	28.8278	28.9527	11.0381	28.8953	28.9193	29.4422	28.5917	25.7183	28.998	29.2761	29.4777	28.7718	21.2452	29.2917	29.3861	29.4165	4.4631	0.794592	0.0539124	0.767686	0.0914158	0.936476	0.0457598	1.17035	0.032483	1026.18		1075.76	150.966	2712.58	2318.37	2094.29	2283.64	2194.51	2231.43	3206.05
RRP6	YOR001W	Exosome complex exonuclease RRP6	Q12149	Yes	No	22.1	26.7032	27.0469	26.8756	26.7972	10.2637	26.2054			26.1868	0.912396	26.305		26.3504	26.0112	12.2948	26.7322	26.4448	26.1902	26.0655	20.9701	26.1787	26.6022	26.7867	20.6464	-0.659652	0.00380865	-0.633518	0.00371965	-0.497558	0.0232853	-0.333214	0.112817	581.279	737.638	655.069	42.0174	411.651			406.374	441.088		455.181
RPS31	YLR167W	Ubiquitin-40S ribosomal protein S31;Ubiquitin;40S ribosomal protein S31	P05759	Yes	No	40.8	32.9758	33.1029	33.0374	33.1947	6.53165	32.6847	32.1774	32.5305	32.7057	15.8563	32.6506	32.7146	32.6032	32.624	3.38321	32.2342	32.3732	32.3546	32.2785	4.49695	32.319	32.3155	32.2569	2.40407	-0.553138	0.00550682	-0.429593	0.000183409	-0.767592	1.04349e-05	-0.780541	4.0299e-05	219371	239570	228936	17289.7	179282	126135	161105	181910	175095	183034	169442
RPS29B	YDL061C	40S ribosomal protein S29-B	P41058	Yes	No	62.5	31.9922	31.5248	32.0955	31.2726	26.0719	32.0931	31.9667	32.1491	32.1158	5.40802	31.5684	31.7043	31.6508	31.4821	6.69181	31.1795	31.0552	31.0737	30.8893	8.18901	30.6639	30.9798	30.4714	18.0826	0.359909	0.11961	-0.119851	0.571575	-0.671863	0.0163478	-1.01625	0.0115285	283890	205325	304963	11675.5	304451	278925	316513	309283	211631	232539	224072
RPS29A	YLR388W	40S ribosomal protein S29-A	P41057	Yes	No	53.6	33.0409	32.4448	32.8549	32.455	20.7853	33.1945	33.1991	33.1914	33.0305	5.54202	32.6893	32.8138	32.9279	32.8855	7.11346	32.4495	32.6303	32.534	32.4884	5.46663	32.1477	32.3115	32.2556	5.71644	0.454972	0.0256562	0.13024	0.440219	-0.173355	0.302511	-0.460633	0.0511294	593185	392407	521422	26763.9	659820	661915	658404	588916	464889	506782	548500
RPS27B;RPS27A	RPS27B;RPS27A	40S ribosomal protein S27-B;40S ribosomal protein S27-A	P38711	Yes	No	56.1	33.632	33.8138	34.2454	33.6051	21.9448	33.3766	33.1243	33.2661	33.2876	7.14523	32.3885	32.8133	32.4991	32.4635	13.6451	32.3624	32.4956	32.5622	32.1594	11.9605	32.03	32.2808	32.192	8.69784	-0.560426	0.0117389	-1.28296	0.000329448	-1.42916	0.000167474	-1.65645	0.000293016	671350	761522	1.02705e+06	44625.3	562417	472184	520962	528779	283548	380630	306127
RPS26B	YER131W	40S ribosomal protein S26-B	P39939	Yes	No	12.6	28.4558		27.7987	27.4344	36.9317	27.9636		26.7246		57.2532		28.3715	26.7511	27.3377	58.2312	27.0673	27.3903			15.7621	27.7436		27.1058	30.7591	-0.55221	0.426465	-0.40952	0.505189	-0.667498	0.197203	-0.471619	0.37451	12241.1		7762.88	408.387	8702.82		3686.94			11546.2	3755.43
RPS26A	YGL189C	40S ribosomal protein S26-A	P39938	Yes	No	12.6	33.8636	32.1311	33.751	33.2685	43.7547	33.1615	32.7037	32.4927	32.5983	21.8874	32.5688	32.6083	32.8595	32.8829	11.3426	32.5634	32.3825	32.5201	32.5256	5.37074	32.1396	31.9444	32.0757	6.81488	-0.514531	0.268791	-0.523692	0.242734	-0.755661	0.106203	-1.20033	0.0512798	517444	155717	478611	23198.1	318054	231578	200065	215264	210901	216757	257994
RPO31	YOR116C	DNA-directed RNA polymerase III subunit RPC1	P04051	Yes	No	9	26.8347	26.6573	26.9466	26.0689	24.2854	25.8157	26.6557	26.2556	26.2826	23.3716		26.7619					26.6409				26.1394	25.8315	25.6778	16.6416	-0.374485	0.200032	0.135051		0.0139848		-0.743965	0.0342052	329.715	291.561	356.298	13.1318	162.698	291.231	220.699	224.869		313.489
RPO21	YDL140C	DNA-directed RNA polymerase II subunit RPB1	P04050	Yes	No	47.7	31.3963	31.6057	31.7117	31.5986	8.91133	31.3667	31.4352	31.4598	31.4058	2.76966	31.4662	31.2909	31.3773	31.2975	5.7652	31.4286	31.4544	31.4567	31.4742	1.29831	31.2693	31.2359	31.3141	2.72363	-0.161176	0.0577866	-0.220105	0.0297542	-0.124611	0.110266	-0.304979	0.0126023	6594.99	7625.17	8206.41	513.852	6461.06	6775.36	6891.79	6638.63	6922.36	6130.19	6508.66
RPN11	YFR004W	Ubiquitin carboxyl-terminal hydrolase RPN11	P43588	Yes	No	58.8	28.7787	28.4592	28.8477	28.7756	11.4034	29.1925	29.3215	29.2625	29.3833	5.64151	29.4166	29.276	29.8588	29.7392	18.6751	29.163	29.254	29.5774	29.3416	12.7139	29.0986	29.3922	29.6291	18.167	0.574656	0.000979596	0.857328	0.00181123	0.61871	0.00251765	0.658001	0.0103335	5985.69	4796.66	6279.05	404.495	7974.2	8720.27	8370.5	9101.49	9314.13	8449.14	12654.7
RPL43B;RPL43A	RPL43B;RPL43A	60S ribosomal protein L43-B;60S ribosomal protein L43-A	P0CX26	Yes	No	92.4	33.4327	33.4222	33.4599	33.2917	5.07865	32.8016	32.5125	32.845	32.9952	13.5066	31.8994	31.9244	31.8818	32.1056	7.39599	31.6966	32.0767	31.8837	31.9465	10.8015	32.4974	32.4198	32.4109	3.32713	-0.613057	0.00126791	-1.4488	4.79332e-07	-1.50076	2.51355e-06	-0.958902	7.07153e-06	513686	509964	523478	31550.6	331685	271451	341814	379323	177473	180583	175329
RPL42B;RPL42A	RPL42B;RPL42A	60S ribosomal protein L42-B;60S ribosomal protein L42-A	P0CX28	Yes	No	64.2	32.6632	31.8106	33.3861	32.567	43.9802	32.5347	32.0062	32.3464	32.1526	16.0337	31.8533	31.7443	31.7504	31.902	5.41587	31.4192	31.5241	31.3811	31.2472	7.87221	30.4499	30.9438	31.0329	20.3835	-0.346771	0.34995	-0.79427	0.0499871	-1.21385	0.0099819	-1.79785	0.00714549	249027	137910	411029	15777.4	227809	157931	199935	174799	142048	131715	132268
RPL40B;RPL40A;UBI4	RPL40B;RPL40A;UBI4	Ubiquitin-60S ribosomal protein L40;Ubiquitin;60S ribosomal protein L40;Polyubiquitin;Ubiquitin	P0CH09	Yes	No	20.3	31.4608	30.785	31.4718	31.2001	20.694	32.1242	31.9398	31.9928	31.8066	9.1032	31.672	31.4562	31.5256	31.5772	6.33338	30.9688	31.4525	31.0707	31.4864	18.0216	30.5462	30.7429	30.5359	8.26141	0.736423	0.00545514	0.328334	0.0971532	0.0151856	0.944143	-0.621095	0.0259976	90792	56837.5	91489.3	5132.38	143802	126544	131284	115389	105107	90506.3	94966.8
RPL37B	YDR500C	60S ribosomal protein L37-B	P51402	Yes	No	37.5	32.8885	32.7167	32.8683	32.7476	5.93509	33.0637	32.6561	32.7561	32.5957	15.1314	32.6319	32.7717	32.6016	32.6166	5.57545	32.3695	32.4255	32.4813	32.1839	8.68542	32.0692	31.9726	31.9525	4.37082	-0.037354	0.751136	-0.149818	0.0419199	-0.440197	0.00128265	-0.807128	3.74936e-05	360237	319792	355217	22125.6	406744	306635	328658	294067	301529	332219	295281
RPL37A	YLR185W	60S ribosomal protein L37-A	P49166	Yes	No	36.4	32.1544	31.8346	31.9575	31.7881	11.649	32.0783	32.0098	31.9727	31.9223	4.57044	31.514	31.5907	31.5796	31.6538	3.9668	30.9363	31.1091	31.2501	31.2628	10.2737	30.8936	30.8071	30.8826	3.23538	0.0621085	0.507382	-0.349115	0.00688773	-0.794098	0.000390556	-1.07254	0.000118601	216961	173832	189283	11399.2	205818	196268	191293	184721	139191	146794	145668
RPE1	YJL121C	Ribulose-phosphate 3-epimerase	P46969	Yes	No	70.6	29.57	29.6199	29.9259	29.0163	24.5931	28.6949	29.0691	28.9989	29.0704	11.6871	28.4093	28.3832	28.5725	28.5712	7.05267	28.1627	28.5548	28.5897	27.9767	20.3041	27.9351	28.6181	28.5389	23.8263	-0.574713	0.0335255	-1.04897	0.00174598	-1.21205	0.00241405	-1.169	0.00969538	13722.1	14205.9	17562.1	633.132	7481.81	9697.05	9236.65	9706	6138.14	6027.77	6873.34
RPD3	YNL330C	Histone deacetylase RPD3	P32561	Yes	No	44.8	28.1981	28.9919	28.8613	28.679	22.21	29.0328	29.0064	28.9824	28.9677	1.98358	29.2332	29.4531	29.3347	29.4556	7.29534	29.3917	29.4441	29.4091	29.7326	11.6815	29.4274	28.8367	28.9489	22.734	0.314763	0.121065	0.686595	0.00921328	0.811822	0.00542642	0.388476	0.188758	2815.27	4880.7	4458.23	266.087	5021.21	4929.97	4848.7	4799.42	5769.23	6719.3	6189.96
RPC11	YDR045C	DNA-directed RNA polymerase III subunit RPC10	Q04307	Yes	No	22.7			23.9866																																593.91
RPC10	YHR143W-A	DNA-directed RNA polymerases I, II, and III subunit RPABC4	P40422	Yes	No	51.4	27.5077	28.0572	28.4233	28.2822	25.3922	28.1655	27.6159	27.6097	26.8963	34.4554	27.2037	26.9412	27.0474	27.0918	7.54161	27.6286	27.2333	27.1663	27.1402	16.8792	27.6395	27.7746	27.5675	7.35973	-0.49575	0.182483	-0.996562	0.00306298	-0.775468	0.0153558	-0.407057	0.155468	11057.5	16183.3	20858.9	1280.92	17444.8	11918.6	11867.6	7237.85	8956.48	7466.73	8036.9
RPB9	YGL070C	DNA-directed RNA polymerase II subunit RPB9	P27999	Yes	No	48.4																						26.1856
RPB3	YIL021W	DNA-directed RNA polymerase II subunit RPB3	P16370	Yes	No	30.8	26.9266	28.0614	26.9051	27.8	40.454	27.554	28.0715	27.8884	27.8866	14.3789	27.8303	27.1389	27.6865	27.6829	19.2254	27.3857	27.4956	27.7697	27.7491	12.9791	27.6738	27.154	27.2642	19.7204	0.42686	0.226414	0.161397	0.646639	0.176756	0.592208	-0.0592643	0.88105	1615.76	3548.05	1591.82	200.454	2495.96	3572.88	3147.02	3143.22	3022.89	1871.87	2736.12
RPB2	YOR151C	DNA-directed RNA polymerase II subunit RPB2	P08518	Yes	No	51.7	30.6425	31.1334	30.8864	30.8019	14.4867	30.8169	30.9706	30.9434	30.8698	4.82787	30.692	30.4839	30.8091	30.716	9.23991	30.8086	30.8062	30.8367	30.8823	2.47041	30.6617	30.9251	30.9005	9.78486	0.0341068	0.763447	-0.190808	0.17274	-0.0326181	0.7644	-0.0369668	0.802483	5400.9	7590.45	6395.94	408.512	6094.98	6780.36	6653.4	6322.8	5589.4	4838.93	6062.11
RPB10	YOR210W	DNA-directed RNA polymerases I, II, and III subunit RPABC5	P22139	Yes	No	58.6	26.8336	27.4789	26.8297	27.5696	27.4092	27.067	27.1965	27.5178	27.5042	15.3729	26.8931	27.1277	27.3648	26.7773	18.3882	26.9595	26.9895	26.9973	27.1954	7.73676	26.7125	26.8608	26.9397	7.89411	0.1434	0.556324	-0.13725	0.587234	-0.142539	0.518608	-0.340312	0.221953	6459.9	10103.6	6442.07	728.647	7594.16	8307.12	10379.6	10281.8	6731.58	7920.4	9334.98
RPA190	YOR341W	DNA-directed RNA polymerase I subunit RPA190	P10964	Yes	No	48.8	31.777	31.7388	31.8924	31.6631	6.68937	30.6405	30.7478	30.7726	30.7738	4.29876	30.58	30.3564	30.6064	30.5505	7.59887	30.2665	30.2031	30.1905	30.2169	2.3265	30.1036	30.036	29.8577	8.64383	-1.03416	1.86663e-06	-1.2445	2.87933e-06	-1.54857	8.09929e-08	-1.76872	4.33876e-06	8824.85	8594.14	9560.13	552.28	4014.09	4323.93	4398.99	4402.83	3849.33	3296.55	3920.32
RPA135	YPR010C	DNA-directed RNA polymerase I subunit RPA135	P22138	Yes	No	47.8	30.8685	30.7452	30.4401	30.555	13.25	29.8348	30.0709	29.7854	29.849	9.11888	29.6152	29.4014	29.6697	29.3896	10.015	29.3616	29.3559	29.2121	29.3816	5.2629	29.0712	29.1332	28.9737	5.53423	-0.76717	0.000544234	-1.13322	7.97341e-05	-1.32439	1.3849e-05	-1.59283	4.28463e-05	6457.07	5928.1	4798.01	351.879	3153.9	3714.69	3047.91	3185.19	2708.72	2335.53	2812.9
RPA12	YJR063W	DNA-directed RNA polymerase I subunit RPA12	P32529	Yes	No	42.4		27.6044	27.7886		9.01585																													6678.92	7588.49
RKR1	YMR247C	E3 ubiquitin-protein ligase listerin	Q04781	Yes	No	7.7	25.8365																25.4939												-0.342614				148.679
RIB2	YOL066C	Bifunctional protein RIB2;tRNA pseudouridine(32) synthase, cytoplasmic;Diaminohydroxyphosphoribosylaminopyrimidine deaminase	Q12362	Yes	No	13.7
RIB1	YBL033C	GTP cyclohydrolase-2	P38066	Yes	No	35.4	25.5772	25.7477	25.8788	26.5027	30.5421	26.9187	27.2083	27.353	27.1708	12.1799	25.7929		26.6691	26.4445	29.0729	25.7854	26.0109	26.251	25.6971	17.5903	25.1867	25.7179	25.2936	20.2675	1.2361	0.00138997	0.375576	0.29938	0.00949879	0.969303	-0.527194	0.112914	583.91	657.134	719.675	75.1066	1479.66	1808.69	1999.4	1762.27	678.071		1244.64
RGA2	YDR379W	Rho-type GTPase-activating protein 2	Q06407	Yes	No	5.8	26.9487		27.2513		14.7781						27.5237			27.8614	16.4797	27.7877		28.1305		16.7211							0.592514	0.12054	0.859104	0.0640831			511.184		630.486						761.469
RGA1	YOR127W	Rho-type GTPase-activating protein 1	P39083	Yes	No	8	27.2137																																616.77
RFA1	YAR007C	Replication factor A protein 1	P22336	Yes	No	46.2	28.3842	28.7045	28.6228	28.3829	11.4819	28.4513	28.813	28.6955	28.651	10.2268	28.7645	28.6129	28.9651	28.6595	11.1668	28.5044	28.645	28.4026	28.5875	7.23636	28.7386	28.6269	28.6385	4.30634	0.129117	0.291918	0.226905	0.0930995	0.0112878	0.912018	0.144409	0.216401	2226.6	2780.17	2627.07	150.654	2332.68	2997.34	2762.89	2678.87	2898.13	2609.21	3330.56
RET1	YOR207C	DNA-directed RNA polymerase III subunit RPC2	P22276	Yes	No	19.8	31.0619	31.6166	31.2854	31.1823	17.2601	31.3941	31.5215	31.3047	31.0587	13.1595	31.2305	31.415	31.6157	31.3613	11.2769	31.3114	31.5652	31.7745	31.357	15.0826	30.6686	30.942	30.7508	9.88019	0.0331477	0.836789	0.119069	0.438442	0.215452	0.225833	-0.499483	0.0241548	7741.78	11371.4	9038.92	569.923	9746.21	10645.9	9160.14	7724.17	8701.51	9888.15	11364.5
REH1	YLR387C	Cytoplasmic 60S subunit biogenesis factor REH1	Q06709	Yes	No	26.6	25.2321		26.8259		71.0339		27.0144				25.9047											25.9891			0.98534		-0.124365				-0.0399543		354.623		1070.38			1219.75			565.218
RCO1	YMR075W	Transcriptional regulatory protein RCO1	Q04779	Yes	No	8.9			22.8191																																41.9662
RAD50	YNL250W	DNA repair protein RAD50	P12753	Yes	No	12.1
PYC2	YBR218C	Pyruvate carboxylase 2	P32327	Yes	No	27.2	33.1307	33.2191	33.1426	33.1322	2.97238	32.6615	32.9143	32.8228	32.8122	7.14832	33.0242	32.7673	32.8669	32.807	8.01696	33.1455	33.2055	33.1604	33.1905	1.89799	33.1605	33.1677	33.0458	4.67609	-0.353466	0.000771243	-0.289797	0.00297887	0.0192988	0.472697	-0.0314828	0.481785	32301.9	34342.8	32569.8	2189.82	23333.2	27802.5	26094	25902.4	30003.4	25109.7	26902.9
PYC1	YGL062W	Pyruvate carboxylase 1	P11154	Yes	No	24.5	28.6978	28.267	28.756	28.2254	19.1883	28.8326	28.6274	28.838	28.7432	6.71353	29.2823	29.2001	29.049	29.118	7.01695	29.8009	29.5176	29.5843	29.6762	8.60181	29.9753	29.991	29.7167	10.3352	0.273748	0.113842	0.675795	0.00387527	1.1582	0.000270506	1.40777	0.00056379	1496.3	1110.04	1557.92	73.0381	1642.84	1425.06	1648.99	1544.18	2243.68	2119.49	1908.72
PUS1	YPL212C	tRNA pseudouridine synthase 1	Q12211	Yes	No	58.1	29.8722	29.5834	29.3078	29.7898	16.7492	29.2338	29.1608	29.2865	29.3547	5.67894	29.4809	29.2241	29.4407	29.2237	9.54327	29.4123	29.3265	29.3764	29.0607	10.5206	29.0146	29.2801	29.1341	9.24997	-0.379344	0.0285404	-0.295957	0.0846279	-0.344283	0.0601353	-0.495342	0.0282461	7070.25	5787.5	4781.25	452.241	4542.17	4317.98	4711.24	4939.1	5390.57	4511.59	5242.5
PRI1	YIR008C	DNA primase small subunit	P10363	Yes	No	28.1	28.3741	29.5899	29.0412	29.3527	32.9175	28.2347	28.6664	28.3441	28.3236	13.7597	28.0553	28.3087	27.8924	28.1647	12.1189	27.9504	27.8372	28.3575	28.021	16.2781	28.0121	28.029	28.0417	1.02835	-0.697281	0.0471532	-0.984208	0.0121925	-1.04796	0.0105896	-1.06191	0.019176	3261.47	7575.85	5178.94	435.261	2961.19	3994.03	3194.35	3149.44	2614.97	3117	2335.69
PRD1	YCL057W	Saccharolysin	P25375	Yes	No	42.8	28.5639	28.8528	28.8794	28.5938	11.5116	28.6385	29.2296	28.9934	28.9195	16.671	28.5696	28.6138	28.6462	28.5045	4.22145	28.4248	28.701	28.6904	28.7396	9.53008	28.5823	28.7722	28.7363	6.86386	0.222774	0.181816	-0.138984	0.168522	-0.0835488	0.477161	-0.0255548	0.825446	2165.43	2645.36	2694.74	149.712	2280.3	3435.02	2916.18	2770.65	2173.89	2241.55	2292.41
POL2	YNL262W	DNA polymerase epsilon catalytic subunit A	P21951	Yes	No	5.8	28.244		28.5376		14.345		29.1876					28.1345	28.8645	29.5651	47.8925	26.7141	28.6812	28.6309	28.7539	46.0316		26.9237	28.2054	58.9903	0.796839		0.463894	0.456682	-0.195789	0.80615	-0.826286	0.335724	555.899		681.404			1069.23				515.294	854.667
POL1	YNL102W	DNA polymerase alpha catalytic subunit A	P13382	Yes	No	12.1	27.641	28.2985	28.1501	27.9451	19.0265	27.8261	28.2334	28.2243	27.4318	24.7925	28.7409	28.8586	29.5799	28.7585	31.1139	28.4796	28.7039	28.0869	28.4328	17.1182	28.07	27.3699	27.5485	26.2932	-0.0797391	0.749193	0.975849	0.00734288	0.417153	0.0717888	-0.345843	0.214612	560.978	884.834	798.342	46.905	637.794	845.836	840.476	485.261	1202.39	1304.64	2150.93
PNC1	YGL037C	Nicotinamidase	P53184	Yes	No	76.4	30.5871	30.1079	30.0565	29.8524	22.8968	31.1192	31.9536	31.4525	31.6068	24.0051	31.5735	31.2983	31.627	31.7196	12.0218	31.3472	31.5517	31.4746	31.6667	9.27096	31.1285	30.823	31.2365	14.3634	1.38207	0.00101878	1.40366	0.000234156	1.35906	0.000200026	0.911712	0.00758687	28854.6	20699.1	19974.6	1174.29	41725.6	74397.6	52569.7	58501.6	57168.9	47240.7	59328.1
PMI40	YER003C	Mannose-6-phosphate isomerase	P29952	Yes	No	62.5	31.5238	31.6397	31.7779	31.4205	10.7215	31.8325	31.6728	31.7296	31.6333	6.07689	31.8456	31.6684	31.8357	31.6518	7.23391	31.588	31.6175	31.5599	31.5528	2.05379	31.4632	31.5136	31.3685	5.06619	0.126568	0.201357	0.159885	0.136224	-0.010939	0.893433	-0.142014	0.205683	28646.2	31043.7	34163.9	1805.91	35482.3	31762.7	33037.5	30905.4	35804.3	31666.2	35559.3
PKC1	YBL105C	Protein kinase C-like 1	P24583	Yes	No	21.5	25.9871	26.3739	25.8892		18.4364	26.2721	25.4806	26.267	25.9567	23.695	26.207	26.8463	26.3998		23.4761		26.4258	26.597	25.8778	24.3132	26.3951	26.5938		9.72338	-0.0892809	0.738482	0.400958	0.170534	0.216835	0.455358	0.411034	0.138539	226.165	295.725	211.326		275.574	159.207	274.598	221.456	263.407	410.267	301.074
PIB2	YGL023C	Phosphatidylinositol 3-phosphate-binding protein 2	P53191	Yes	No	26.1	26.2314	27.0766	26.7725	27.0961	25.2726	27.7912	26.941	27.3206	27.3371	24.5124	27.0512	26.7811		26.7451	11.9397	27.0884	27.1955	26.5222	27.1818	19.8373	27.6225	26.8507	27.1212	27.8872	0.553295	0.0829985	0.0649671	0.806792	0.202809	0.460844	0.403948	0.242017	498.815	896.138	725.825	61.512	1470.52	815.73	1061.26	1073.42	880.5	730.13
PHO8	YDR481C	Repressible alkaline phosphatase;Soluble alkaline phosphatase	P11491	Yes	No	40.1	28.3847	28.691	28.539	28.5127	8.76351	28.3149	28.3996	28.4494	28.4453	4.26883	28.53	28.1851	28.8335	28.5975	18.0445	28.5651	28.3619	28.6023	28.6082	7.77259	28.0817	28.2483	28.0786	6.85744	-0.129571	0.114417	0.00465401	0.975932	0.00251437	0.977546	-0.395657	0.00640061	2487.07	3075.36	2767.81	184.06	2369.56	2512.9	2601.18	2593.66	2750.63	2165.75	3394.49
PHO23	YNL097C	Transcriptional regulatory protein PHO23	P50947	Yes	No	27.3		24.8306	25.1329		14.7664	24.77		24.712	24.76	2.13487	24.6739	25.0702	25.2939	24.7247	20.6962	24.726	24.9862	24.9688	24.8348	8.35979	25.1504	24.942		10.1965	-0.234406	0.134332	-0.0410529	0.872048	-0.102764	0.474588	0.06445	0.759113		360.293	444.304		345.476		331.879	343.097	323.221	425.394	496.762
PEP5	YMR231W	Vacuolar membrane protein PEP5	P12868	Yes	No	7																					25.4492
PEP3	YLR148W	Vacuolar membrane protein PEP3	P27801	Yes	No	11.8			25.2375																		25.5263	25.6883	25.7953	9.29055							0.432501				164.675
PDR1	YGL013C	Transcription factor PDR1	P12383	Yes	No	9.3																							24.616
PDE2	YOR360C	3,5-cyclic-nucleotide phosphodiesterase 2	P06776	Yes	No	4.6											23.8885																														113.82
PDE1	YGL248W	3,5-cyclic-nucleotide phosphodiesterase 1	P22434	Yes	No	5.7																						24.5078
PCF11	YDR228C	Protein PCF11	P39081	Yes	No	8.9			24.1905																		24.9285										0.737915				119.06
PAN3	YKL025C	PAB-dependent poly(A)-specific ribonuclease subunit PAN3	P36102	Yes	No	7.8
OTU1	YFL044C	Ubiquitin thioesterase OTU1	P43558	Yes	No	4.7									23.0777																															118.112
OMA1	YKR087C	Mitochondrial metalloendopeptidase OMA1	P36163	Yes	No	9.9																						28.3489
NRP1	YDL167C	Asparagine-rich protein	P32770	Yes	No	17.2	25.6282		26.2327	25.9922	20.5407		25.47												25.0234						-0.481081				-0.927637				292.411		444.602	25.4856		262.033
NPY1	YGL067W	NADH pyrophosphatase	P53164	Yes	No	18			25.3854					25.2935									25.4693				24.969	24.6252		16.7721	-0.0918679				0.0838531		-0.588285				450.32				422.539
NPL4	YBR170C	Nuclear protein localization protein 4	P33755	Yes	No	31.2	29.7821	30.304	30.3993	30.7513	26.5272	30.0866	30.6874	30.1961	30.2832	19.2939	30.1646	29.46	30.1082	30.3647	24.326	30.1449	30.3972	29.9661	30.1046	12.8013	30.435	30.0366	30.0062	17.2806	0.00415939	0.986699	-0.284781	0.348788	-0.155952	0.504192	-0.149901	0.594301	6274.65	9009.71	9624.81	831.974	7749.6	11752.2	8360.63	8880.57	8179.83	5019.23	7866.51
NOB1	YOR056C	20S-pre-rRNA D-site endonuclease NOB1	Q08444	Yes	No	13.9	25.3522		26.3161		45.5604																												370.12		721.938
NCS6	YGL211W	Cytoplasmic tRNA 2-thiolation protein 1	P53088	Yes	No	3.9									23.6571																															147.902
NCE103	YNL036W	Carbonic anhydrase	P53615	Yes	No	84.6	26.917		23.9239	24.4786	111.913	23.6298	22.6249	23.1645	23.1808	27.7733	23.3163		22.3374		46.2195	25.6513	24.6082		24.4149	49.6742	28.776	27.9757	26.9792	57.7334	-1.95647	0.0597226	-2.27962	0.163685	-0.214997	0.8397	2.80384	0.05668	2278.9		286.234	28.4733	233.448	116.33	169.09	171.019	187.855		95.3108
NAM7	YMR080C	ATP-dependent helicase NAM7	P30771	Yes	No	32.2	27.5965	27.9883	27.9505	27.8703	11.6624	27.0865	27.7071	27.5355	27.9123	22.9306	26.9724	27.2415	27.2212	27.0591	8.90456	26.9939	26.9256	26.8687	26.896	3.76557	27.2034	26.9685	27.11	8.12342	-0.291037	0.189561	-0.727872	0.00056484	-0.930375	5.59232e-05	-0.757436	0.00142831	829.144	1087.85	1059.78	67.889	582.248	895.25	794.825	1032.08	537.959	648.272	639.243
NAM2	YLR382C	Leucine--tRNA ligase, mitochondrial	P11325	Yes	No	7.2				25.5336																																14.4291
NAB2	YGL122C	Nuclear polyadenylated RNA-binding protein NAB2	P32505	Yes	No	10.3	25.1096	25.7094	24.7376	25.4201	28.1792	25.5366	25.7442	25.3022	25.6346	12.6713	25.8207	25.8412	26.2983	26.2504	17.6874	26.2243	26.1084	26.2809	26.2691	5.34394	26.0412	26.2617	25.7196	18.489	0.310224	0.22407	0.808504	0.0163978	0.976517	0.00369119	0.763323	0.0413492	277.533	420.615	214.455	23.3094	373.123	430.895	317.167	399.364	454.354	460.863	632.655
MXR2	YCL033C	Peptide methionine sulfoxide reductase 2	P25566	Yes	No	26.8	25.6119		25.9564		16.8068																25.8028	26.2523	25.992	15.7804							0.231561	0.353803	1189.2		1509.97
MSN4	YKL062W	Zinc finger protein MSN4	P33749	Yes	No	15.7	25.7133	25.8627	25.5999	26.1969	18.7601	25.919	25.3865	25.7359	25.6766	14.8921															-0.163692	0.373535							352.779	391.267	326.102	33.4047	406.836	281.266	358.357	343.91
MSN2	YMR037C	Zinc finger protein MSN2	P33748	Yes	No	10.7	24.8719		24.681	23.3855	45.8399	25.1444	26.2078	25.0985	25.207	42.6138	26.0988	24.3359	24.4959	26.55	70.248				24.248		25.4759	24.1538		60.616	1.1016	0.0793067	1.05738	0.227397	-0.064796		0.502081	0.564916	176.311		154.456	4.26137	212.958	445.05	206.291	222.404	412.681	121.599	135.862
MSL5	YLR116W	Branchpoint-bridging protein	Q12186	Yes	No	9.7	27.6075		27.1981	28.9072	65.7429																27.7563	28.1631		19.8046							0.0554492	0.940339	1723.92		1298.02	287.426
MSC2	YDR205W	Probable zinc transporter MSC2	Q03455	Yes	No	6.4	26.5922										25.623	25.7363	25.8953	25.6334	8.97249	25.6937	26.1754		25.8172	17.8939	26.6244	25.8372	25.7588	35.5357			-0.870191		-0.696786		-0.518766		561.357								286.738	310.17	346.292
MRPL32	YCR003W	54S ribosomal protein L32, mitochondrial	P25348	Yes	No	12	25.1927		26.0969	25.936	30.158			25.8682																	0.126278								799.835		1496.89	90.674			1277.4
MPE1	YKL059C	Protein MPE1	P35728	Yes	No	12.7			24.7946																			24.5345									-0.260162				262.082
MOT3	YMR070W	Transcriptional activator/repressor MOT3	P54785	Yes	No	5.9	25.3778	25.6677	26.4102	26.144	31.541	25.7028	25.329			18.2217			24.6076					25.4605			25.76		25.0411	34.5232	-0.384007	0.353875	-1.29232		-0.439475		-0.499347	0.292107	358.458	438.223	733.194	41.2865	449.034	346.528					210.175
MOT2	YER068W	General negative regulator of transcription subunit 4	P34909	Yes	No	42.1	27.1928	26.9426	27.5069	26.6227	25.8117	26.8713	26.7856	26.9947	26.6431	10.197	26.8369		26.4147		20.5486	26.8858	26.7223	26.3639	26.1169	23.5188	26.579	26.4883	26.7176	8.06458	-0.242578	0.274243	-0.440461	0.227964	-0.544015	0.0773561	-0.471252	0.0945269	1049.51	882.38	1304.76	47.8733	839.828	791.392	914.876	716.959	820.057		611.981
MOB1	YIL106W	DBF2 kinase activator protein MOB1	P40484	Yes	No	36.3	27.2019	27.1889	27.1213	27.0648	4.38251	27.5665	27.6066	27.4092	27.3162	9.3205	27.7008	27.4547	27.5277	27.9037	14.1651	27.1435	27.4882	27.2109	27.1182	12.3478	27.0056	26.9204	26.8491	5.4416	0.330443	0.00452195	0.502518	0.00303903	0.0959652	0.330803	-0.219177	0.00931	1923.59	1906.27	1819.05	118.457	2476.7	2546.47	2220.89	2082.21	2718.3	2291.91	2410.91
MIG1	YGL035C	Regulatory protein MIG1	P27705	Yes	No	16.9	25.6797		25.5933	25.1829	17.4516	26.1691	25.6885		25.7486	18.9361	26.3951	26.5559		26.296	9.17705	26.2503	26.0434	25.4521	25.6155	25.4971	25.9717	25.8901	26.1331	8.67802	0.383437	0.149478	0.930393	0.00553344	0.355038	0.220493	0.513008	0.0386222	432.731		407.595	20.7681	607.499	435.387		453.905	710.523	794.328
MHT1	YLL062C	Homocysteine S-methyltransferase 1	Q12525	Yes	No	21.3
MET6	YER091C	5-methyltetrahydropteroyltriglutamate--homocysteine methyltransferase	P05694	Yes	No	88.7	34.7274	34.8254	34.5685	34.646	7.66373	34.2669	34.6055	34.5105	34.5296	9.76984	34.2583	34.1267	34.2207	34.1235	4.7131	33.9004	33.8871	33.9726	33.9933	3.63745	33.9699	34.0741	33.803	9.36706	-0.213711	0.0586353	-0.50953	0.000221578	-0.753465	1.71793e-05	-0.742842	0.000491266	148111	158526	132672	9480.69	107640	136119	127438	129136	107000	97673.4	104250
MES1	YGR264C	Methionine--tRNA ligase, cytoplasmic	P00958	Yes	No	64	32.1305	32.5989	32.2497	32.3194	14.2772	31.3544	31.5129	31.391	31.4302	4.75814	30.5888	30.6425	30.7025	30.6993	3.70703	30.2499	30.2264	30.467	30.3478	7.71799	30.0266	30.3545	30.1389	11.7258	-0.902511	0.000136629	-1.66638	3.54233e-06	-2.00183	2.1324e-06	-2.15129	2.31107e-05	24535.2	33945.5	26647.6	1893.95	14326.5	15990.1	14694.9	15099.9	8427.14	8746.5	9118.05
MDJ1	YFL016C	DnaJ homolog 1, mitochondrial	P35191	Yes	No	52.8	28.6914	28.4932	28.4829	28.2734	11.7933	28.3984	28.7018	28.6074	28.5567	8.66016	28.2977	28.4671	28.7182	28.5933	12.3197	28.6825	28.5467	28.5947	28.4629	6.36557	28.6691	28.9345	28.6555	11.222	0.080842	0.476047	0.0338365	0.794003	0.086447	0.40673	0.267761	0.0876788	3488.23	3040.58	3018.93	176.814	2847.13	3513.58	3291	3177.3	2655.12	2985.94	3553.74
MCM7	YBR202W	DNA replication licensing factor MCM7	P38132	Yes	No	13.4	26.3712		26.1452	27.48	53.344		26.4111	26.3513		2.9328			25.8551								26.1706	25.9674		9.94443	-0.284282	0.630727	-0.810423				-0.596471	0.348324	408.766		349.497	59.7007		420.228	403.153				285.821
MCM6	YGL201C	DNA replication licensing factor MCM6	P53091	Yes	No	31.3	27.843	28.3815	28.0122	28.3768	18.2832	28.426	27.8852	28.2387	28.4533	17.02	27.8618	27.9945	27.9109	28.2356	11.9441	28.3152	28.4845	28.1749	28.3319	8.80316	28.5814	28.4235	28.5494	5.70214	0.097441	0.622648	-0.152654	0.372206	0.173283	0.288969	0.364735	0.0775182	952.716	1383.86	1071.28	93.4105	1427.19	981.05	1253.39	1454.42	965.261	1058.26	998.66
MCM5	YLR274W	Minichromosome maintenance protein 5	P29496	Yes	No	24			26.9406	26.3301	29.4806	26.7466	26.7837	26.3739	26.3349	16.3977	26.3313	26.9381		26.9529	22.6402	26.3614	26.4069	26.8051	26.4165	15.2631	26.8813	26.5902	26.5211	13.646	-0.0755464	0.784651	0.105448	0.78214	-0.137846	0.60047	0.0288719	0.921139			666.424	29.5614	582.604	597.764	449.96	437.967	436.875	665.286
MCM4	YPR019W	DNA replication licensing factor MCM4	P30665	Yes	No	34.6	27.8943	27.2135	28.3009	27.8487	29.2793	27.7899	27.3554	27.7757	27.5179	14.29	27.6197	27.8615	27.8226	27.874	7.90811	27.9274	28.0753	28.0355	27.801	8.37939	27.5658	27.7915	27.782	8.61258	-0.204654	0.440921	-0.0199385	0.934387	0.145451	0.555189	-0.101282	0.725648	1062.3	662.678	1408.09	69.7007	988.078	731.148	978.455	818.31	878.135	1038.37	1010.77
MCM2	YBL023C	DNA replication licensing factor MCM2	P29469	Yes	No	25.8		26.6647	27.1167		21.9787	27.8425	27.5827	27.6213	27.1747	18.3772	27.6462	27.084	27.0968	26.9265	23.6513	27.6891	27.462	26.9139	27.1692	23.1689	27.2683	27.3542	26.5723	26.9505	0.664604	0.0567797	0.297665	0.338025	0.41786	0.221875	0.17425	0.662593		481.503	658.705		1089.33	909.822	934.49	685.727	950.784	643.904	649.653
MAS1	YLR163C	Mitochondrial-processing peptidase subunit beta	P10507	Yes	No	37	27.7745	27.2364	27.7858	28.1848	25.9773	26.8583	27.9881	27.9808	28.0554	31.962	27.3961	27.8254	27.8359		16.4467	27.5138	27.8529	28.6657	27.6721	39.848	27.6193	27.8476	27.4782	13.0797	-0.0247056	0.945641	-0.0595488	0.828085	0.180802	0.594402	-0.0969831	0.711068	2009.44	1383.83	2025.2	180.847	1064.81	2330.13	2318.31	2441.37	1545.83	2081.56	2096.88
MAP1	YLR244C	Methionine aminopeptidase 1	Q01662	Yes	No	59.9	31.2045	31.2244	31.4734	31.3082	8.71134	28.6457	28.9102	28.9035	28.9743	9.63752	27.3535	26.2354	24.5603	26.9094	62.7625	27.841	27.5328	27.7974	27.8418	9.78098	27.6184	27.8582	27.9012	10.2502	-2.44421	2.27477e-07	-5.03798	0.000179782	-3.54938	2.64346e-08	-3.51003	4.1426e-07	25508.5	25861	30734.7	1856.16	4329.1	5200.14	5176.12	5436.3	1767.64	814.352	255.023
MAG2	YLR427W	RING-finger protein MAG2	Q06436	Yes	No	3.6	23.4586		22.739	23.2898	24.3378	24.0305	23.5591	23.0829	22.9234	35.9016	23.4774	22.6697	23.7578	23.3928	28.6945		23.1306	23.227	23.3896	9.16194		22.9606			0.236483	0.526179	0.161954	0.643391	0.0865801	0.725768	-0.201896		67.5363		41.0104	4.06867	100.391	72.4047	52.0506	46.6017	68.4209	39.0882	83.0964
LYS21	YDL131W	Homocitrate synthase, mitochondrial	Q12122	Yes	No	26.4	30.0767	29.6811	29.7456	29.5482	16.2789	29.3336	29.2987	29.2938	29.3255	1.35923	29.2126	29.3388	29.2739	29.2283	3.95839	29.2378	29.2366	29.3535	29.2039	4.63322	29.5999	28.9624	29.4632	21.8262	-0.450022	0.00721124	-0.499504	0.00503962	-0.50495	0.0050236	-0.421095	0.100883	10418.8	7919.88	8282.1	489.137	6224.39	6075.89	6055.01	6189.7	5723.69	6247.12	5972.11
LYS20	YDL182W	Homocitrate synthase, cytosolic isozyme	P48570	Yes	No	25	32.6507	32.5204	32.6344	32.4438	6.73325	31.7784	31.9943	31.8037	31.8147	7.06708	31.4207	31.3825	31.5837	31.541	6.63264	31.6232	31.6204	31.6639	31.7092	2.90852	31.8298	31.8691	31.8825	1.88959	-0.714507	4.98754e-05	-1.08031	4.12055e-06	-0.908119	2.60217e-06	-0.701827	7.6897e-05	64007.4	58479.7	63289.7	3755.57	34966.9	40611.3	35585.8	35857.3	27288.1	26575.2	30552.7
LYS14	YDR034C	Lysine biosynthesis regulatory protein LYS14	P40971	Yes	No	6.7			22.9393					22.4393	22.8347	19.257				23.813								22.9132	23.4665	26.7921	-0.302314		0.873735				0.25054				40.2253				28.4438	37.411
LNP1	YHR192W	Protein lunapark	P38878	Yes	No	46						26.4866			26.7221	11.5136		26.4026					27.0323	26.9364	26.7574	9.52867	26.923	27.1643	26.9543	9.30801													1311.25			1543.67		1237.06
LEU9	YOR108W	2-isopropylmalate synthase 2, mitochondrial	Q12166	Yes	No	22.8	27.3097	27.8877	28.2854	27.8932	26.4967	27.3247	27.2921	27.1655	27.1838	5.46023	27.7464		27.3432	27.4954	14.3092	27.2895	27.2373	27.3196	26.985	10.0778	27.5412	27.1853	27.0244	18.8177	-0.60251	0.0258687	-0.315644	0.274542	-0.636178	0.0252782	-0.593712	0.0791288	1106.84	1652.21	2176.62	112.324	1118.35	1093.4	1001.52	1014.29	1498.12		1132.85
LEU4	YNL104C	2-isopropylmalate synthase	P06208	Yes	No	3.9	31.904	31.9853	32.0401	31.9249	4.29055	31.6603	31.8557	31.8036	31.7565	5.69703	31.86	31.7256	31.921	31.6777	7.8727	31.8424	31.8745	31.9519	31.9855	4.60165	31.7153	31.8431	31.7878	4.42861	-0.194561	0.00934982	-0.167487	0.0409808	-0.0500049	0.311679	-0.181489	0.0126717	26264.4	27785.9	28861.6	1804.54	22181.5	25399	24497.1	23710.9	25474.8	23208.9	26574.1
LAP2	YNL045W	Leukotriene A-4 hydrolase homolog	Q10740	Yes	No	43.5	28.864	28.989	28.5695	29.6391	33.6657	28.8429	29.4386	29.16	29.1036	16.9937	28.7678	28.6305	28.9376	29.1413	15.4597	28.7194	28.8858	28.7534	28.8935	6.19597	28.8364	29.0769	29.0756	9.3192	0.120872	0.654337	-0.146087	0.5821	-0.202371	0.413049	-0.0191118	0.947353	2823.93	3079.64	2302.46	327.279	2782.95	4205.64	3467.07	3334.07	2641.8	2401.99	2971.73
KAE1	YKR038C	tRNA N6-adenosine threonylcarbamoyltransferase	P36132	Yes	No	28.2	25.7493	26.0135	25.5968	25.7393	12.3991	26.0129					26.3606										26.8817	26.5082	25.9405	31.3642	0.238129		0.585828				0.668714	0.0446329	589.92	708.502	530.765	39.6739	708.167				901.164
IRC20	YLR247C	Uncharacterized ATP-dependent helicase IRC20	Q06554	Yes	No	5.3			25.9428																																159.902
HST2	YPL015C	NAD-dependent protein deacetylase HST2	P53686	Yes	No	16.2		25.8662					25.3308		25.4912	7.85551							25.3145	25.631	26.041	25.4393	25.389	25.6509	25.5947	9.33156	-0.455233				-0.204065		-0.321362			684.033				471.943		527.457
HST1	YOL068C	NAD-dependent protein deacetylase HST1	P53685	Yes	No	11.5						26.0407																24.9407															534.869
HOS3	YPL116W	Histone deacetylase HOS3	Q02959	Yes	No	24.1	26.0897	25.9947	26.4697	26.3294	15.1295	26.5702	26.9387	26.7212	26.6034	11.938	26.7184	26.9376	26.7363	26.564	10.7494	26.5936	26.826	26.1356	26.5725	18.9361	26.3791	26.2952	26.5053	7.37879	0.487502	0.0119663	0.518255	0.0080408	0.31107	0.135654	0.17236	0.268498	403.14	377.444	524.625	32.2361	562.465	726.142	624.528	575.584	623.343	725.634	631.133
HNT1	YDL125C	Hit family protein 1	Q04344	Yes	Yes	74.1	30.3614	30.2682	30.1724	29.9575	11.6581	28.8602	29.1401	28.9	29.1863	11.4326	28.1767	28.4122	28.5539	28.6201	13.1205	28.139	28.169	28.4256	28.2575	9.15978	27.5466	28.1613	27.6111	24.6921	-1.16822	6.64521e-05	-1.74911	1.08288e-05	-1.94209	1.888e-06	-2.41683	5.71098e-05	34884.4	32701.9	30600.4	1785.63	12323.1	14962.1	12667.8	15448.9	7673.36	9033.93	9966.36
HIS4	YCL030C	Histidine biosynthesis trifunctional protein;Phosphoribosyl-AMP cyclohydrolase;Phosphoribosyl-ATP pyrophosphohydrolase;Histidinol dehydrogenase	P00815	Yes	No	73.7	32.9721	33.3929	33.4098	33.1321	14.3953	32.2521	32.237	32.2637	32.4163	5.93625	32.5002	32.4307	32.5251	32.4259	3.45451	33.2594	33.195	33.1478	33.1358	3.92513	33.6684	33.6511	33.5738	3.45785	-0.934442	0.000177252	-0.756273	0.000442584	-0.0422446	0.713426	0.404364	0.0249847	42942.8	57487.2	58165	3249.3	26071.3	25799.6	26281.3	29213	30962.2	29506.1	31500.5
HEM2	YGL040C	Delta-aminolevulinic acid dehydratase	P05373	Yes	No	47.7	28.6432	28.8991	28.5039	28.3293	16.9473	28.3494	28.7428	28.7185	28.642	11.8728	28.4866	28.4166	28.4317	28.6983	9.36424	28.3528	28.4768	28.3275	28.8	15.8715	28.6793	28.5808	28.6946	4.23193	0.0192793	0.902289	-0.0855842	0.554581	-0.104576	0.542623	0.0576931	0.707977	4966.72	5930.45	4509.56	270.58	4051.45	5321.53	5232.68	4962.46	4455.66	4244.79	4289.21
HDA1	YNL021W	Histone deacetylase HDA1	P53973	Yes	No	14.7	25.4508																				26.4031										0.952334		256.087
HAP1	YLR256W	Heme-responsive zinc finger transcription factor HAP1	P0CE41	Yes	No	18.9		26.5653				25.6825	25.4983	26.1794	25.9185	20.6723							26.05								-0.745598				-0.515285					267.269			144.943	127.572	204.545	170.712
HAL9	YOL089C	Halotolerance protein 9	Q12180	Yes	No	4.7				24.5798			26.0652				26.2366			26.2232	0.65586	25.8549	26.1516		26.1266	11.0178					1.48543		1.65011		1.46456							6.43822		266.19			299.765
HAA1	YPR008W	Transcriptional activator HAA1	Q12753	Yes	No	7.3
GZF3	YJL110C	Protein GZF3	P42944	Yes	No	11.3	24.8656								24.7911								25.0996								-0.0744726				0.234036				225.841							214.479
GTS1	YGL181W	Protein GTS1	P40956	Yes	No	35.9	26.4022	26.6227	26.6955	26.6211	8.49968	26.7178	27.0946	26.844	27.032	11.8384	27.0188	27.4845	27.2491	26.5859	25.2524	27.7664	27.127	27.1627	26.9483	26.9126	27.179	27.0047	27.0432	6.43559	0.336702	0.0200852	0.499187	0.048157	0.665716	0.0124949	0.490282	0.00245991	892.909	1040.36	1094.23	70.3808	1111.24	1442.89	1212.83	1381.68	1369.09	1890.63	1606
GPI13	YLL031C	GPI ethanolamine phosphate transferase 3	Q07830	Yes	No	2.9							25.1822												24.934			25.1071																147.201
GLO3	YER122C	ADP-ribosylation factor GTPase-activating protein GLO3	P38682	Yes	No	69.2	29.4669	29.6091	29.3337	29.6241	9.27242	29.8332	29.6736	29.6016	29.6374	7.26837	29.5313	29.3728	29.4088	29.2098	9.09354	29.2778	29.2	29.0261	29.5835	16.6309	29.1178	29.1766	29.0883	3.13074	0.178007	0.0816397	-0.127745	0.227723	-0.236621	0.13004	-0.380874	0.00606013	6021.6	6645.67	5490.7	454.749	7762.33	6949.5	6611.1	6777.05	6296.79	5641.65	5784.07
GLO2	YDR272W	Hydroxyacylglutathione hydrolase, cytoplasmic isozyme	Q05584	Yes	No	36.1	27.2457	28.0793	27.7507	28.3938	32.2978	26.9572	25.8268	27.5448	27.1308	42.3668	27.1473	26.9106	26.8003	26.697	13.7623	27.2878	26.7738	27.2808	26.687	21.9656	26.4411	26.6984	26.3886	11.8065	-1.00247	0.063707	-0.978573	0.00994814	-0.860022	0.0262319	-1.358	0.00634029	2271.29	4047.77	3223.11	340.885	1859.54	849.459	2794.52	2097.46	2121.58	1800.45	1668
GLO1	YML004C	Lactoylglutathione lyase	P50107	Yes	No	15.6	26.8248	27.375	26.8336	26.8034	20.9833			26.4831													26.4532				-0.476088						-0.506049		1428.35	2091.52	1437.12	95.3074			1127.14
GLN4	YOR168W	Glutamine--tRNA ligase	P13188	Yes	No	71.3	32.1905	32.1315	32.193	32.1588	2.01196	31.5336	31.8613	31.786	31.738	9.42805	31.6503	31.3784	31.6077	31.4904	8.38269	31.5032	31.3458	31.4454	31.511	5.19567	31.1746	31.3448	31.1851	6.73102	-0.438721	0.000865987	-0.636753	5.43672e-05	-0.717093	2.17799e-06	-0.933662	7.48221e-06	23529.4	22586.6	23569.7	1558.85	14922.8	18729.3	17776.3	17195	16180.6	13401.5	15709.6
GLN3	YER040W	Nitrogen regulatory protein GLN3	P18494	Yes	No	12.6			25.6734																		25.5525	25.0841	25.9003	27.5363							-0.161154				301.406
GIS2	YNL255C	Zinc finger protein GIS2	P53849	Yes	Yes	5.9				22.495																																10.4651
GIS1	YDR096W	Transcriptional activator/repressor GIS1	Q03833	Yes	No	7.7	27.5906		27.7551		8.0503	27.8848	28.0039	27.3841	27.8439	17.3892	27.9978		28.3755	28.0915	13.9921	28.3222	27.8111	27.9067	27.8228	17.9573		27.6693			0.106348	0.639393	0.482092	0.0561054	0.292848	0.194193	-0.0035271		908.39		1018.05		1113.87	1209.73	787.223	1082.72	1204.61		1565.05
GET3	YDL100C	ATPase GET3	Q12154	Yes	No	63	30.8131	30.9632	30.8406	30.8032	5.23032	30.7178	30.8769	31.0056	30.985	8.89651	30.9232	30.5805	31.0269	30.6987	14.0633	30.7584	30.7753	30.889	30.9194	5.58722	30.4236	30.5779	30.8246	14.1989	0.0413257	0.603843	-0.0477167	0.675477	-0.0194867	0.733572	-0.246306	0.0696226	21432.7	23783.4	21845.2	1441.63	20063.7	22403	24492.3	24145.8	23132.4	18241.4	24857
GCS1	YDL226C	ADP-ribosylation factor GTPase-activating protein GCS1	P35197	Yes	No	88.4	30.205	30.4118	30.4584	30.2291	8.85092	30.05	30.0548	30.1867	30.1795	5.23367	30.1601	30.2614	30.2895	30.4002	6.85676	29.9296	30.0152	29.9229	29.8416	4.92055	29.697	29.8455	29.6625	6.84703	-0.2083	0.0308367	-0.048258	0.571678	-0.398709	0.00157295	-0.591044	0.00116378	14082	16251.8	16785.4	969.699	12647.3	12689.4	13904.6	13835.2	13650.8	14643	14930.8
GAT1	YFL021W	Transcriptional regulatory protein GAT1	P43574	Yes	No	11.2							24.4724	25.6253		53.6792				24.6398								25.7445																184.761	410.828
FOL2	YGR267C	GTP cyclohydrolase 1	P51601	Yes	No	54.7	28.572	28.4953	28.5267	28.4418	3.78413	27.6801	27.9371	27.8831	28.1043	12.0057	28.4137	28.6235	27.9299	28.0762	21.912	28.244	27.9492	28.181	28.3408	11.1749	28.0723	28.2299	28.1848	5.56323	-0.607803	0.000565903	-0.248127	0.172101	-0.330195	0.0093281	-0.346622	0.00103476	6424.73	6092.42	6226.37	397.569	3462.41	4137.66	3985.51	4645.95	5757.37	6658.35	4116.89
FMP30	YPL103C	N-acyl-phosphatidylethanolamine-hydrolyzing phospholipase D, mitochondrial	Q02883	Yes	No	11.3											29.4328					29.2554						27.6731																			5959.75
FCY1	YPR062W	Cytosine deaminase	Q12178	Yes	No	56.3	29.5303	29.1544	29.1462	28.6821	23.4863	27.6712	26.5191	26.0679	26.2472	58.0119													25.7242		-2.50191	0.000775216					-3.40409		19801.9	15259	15172.6	744.913	5458.24	2455.97	1796.37	2034.2
FBA1	YKL060C	Fructose-bisphosphate aldolase	P14540	Yes	No	91.9	36.7348	36.5043	36.4711	36.5173	8.64524	36.7068	36.2017	36.3129	36.3825	15.7513	36.1603	36.5887	36.3159	36.3527	12.512	36.2122	36.3757	36.2374	35.976	11.2138	36.6828	36.3116	36.5823	12.9185	-0.15591	0.255517	-0.202433	0.10738	-0.356536	0.0131362	-0.0313201	0.799406	1.2905e+06	1.09993e+06	1.07494e+06	75166.2	1.26568e+06	891841	963295	1.01087e+06	866631	1.16626e+06	965303
ESA1	YOR244W	Histone acetyltransferase ESA1	Q08649	Yes	No	20			25.896	25.2772	29.8726		25.931	25.3479	25.8565	20.5419							25.4091	25.5667	26.0285	23.1876					0.125204	0.729923			0.0815231	0.822285					530.629	23.4017		543.665	362.905	516.301
ELF1	YKL160W	Transcription elongation factor 1	P36053	Yes	No	25.5	25.1794		25.6598		23.3335	25.5762						25.4695				26.3739					26.7057	27.3271		29.9966	0.156591		0.0498423		0.954336		1.59681	0.0555095	1051.45		1466.97		1384.34					1285.61
ECM22	YLR228C	Sterol regulatory element-binding protein ECM22	Q05958	Yes	No	2.6						21.6289	20.1415	20.9316	20.937	40.882				21.7726		21.7346		21.6863	21.6943	1.80146	21.8302		22.7498	43.6094													16.2393	5.79167	10.015	10.053
ECM14	YHR132C	Putative metallocarboxypeptidase ECM14	P38836	Yes	No	41.2	28.608	27.8043	28.398	28.0746	24.0765	28.79	29.0723	28.7871	28.4936	16.316	29.0445	28.7287	28.6447	28.6678	13.5716	29.1048	29.2389	29.1122	29.254	5.53601	29.2674	29.5754	29.4071	10.7257	0.564505	0.0379221	0.550183	0.0331729	0.956232	0.00188654	1.19539	0.00299958	3671.04	2102.99	3173.78	171.775	4164.62	5064.65	4156.09	3391.18	4967.93	3991.36	3765.7
DUS3	YLR401C	tRNA-dihydrouridine(47) synthase [NAD(P)(+)]	Q06053	Yes	No	35.9	28.3982	29.0837	29.5179	29.6345	34.303	28.4233	28.1173	28.2508	28.6596	16.5345	27.2989	27.965	28.2941	27.9076	26.7157	27.7266	27.8989	27.8082	28.109	11.7246	27.5553	28.1471	26.8662	42.6823	-0.795777	0.0393862	-1.29214	0.00997028	-1.27288	0.004747	-1.63571	0.0154038	2065	3320.91	4487.05	329.455	2101.25	1699.65	1864.43	2475.17	963.825	1529.32	1921.23
DUG2	YBR281C	Probable di- and tripeptidase DUG2	P38149	Yes	No	15.8	25.9766	26.4927	26.2203	26.7811	24.1137		26.3968		25.9919	19.7138	26.5303	25.911		26.3047	20.9904	26.0338	25.8681		26.4435	21.1953	25.9997	26.1914	26.116	6.64611	-0.173305	0.580107	-0.119011	0.66043	-0.25254	0.359166	-0.265294	0.263216	301.017	430.495	356.421	35.6041		402.799		304.24	441.86	287.641
DUG1	YFR044C	Cys-Gly metallodipeptidase DUG1	P43616	Yes	No	77.3	31.867	31.8819	31.7773	31.5289	10.8053	31.8567	31.9738	32.0096	32.0238	5.14512	31.7893	31.6804	31.8413	31.8887	6.11256	31.8082	31.8189	31.9564	31.6934	7.5029	31.7027	31.8098	31.7493	3.72983	0.202162	0.0657757	0.036144	0.711161	0.0554312	0.591316	-0.00987378	0.925186	33121.7	33465	31125.2	1774.46	32885.8	35665.4	36560.9	36923.7	31384.8	29103.3	32535.7
DST1	YGL043W	Transcription elongation factor S-II	P07273	Yes	No	78.6	28.4781	29.0939	28.9125	28.8918	17.0124	28.8014	28.4971	28.8151	28.8632	10.9383	28.764	28.7995	28.5507	28.6164	8.16795	28.4079	28.944	28.5583	28.5757	16.5851	28.7476	28.8032	28.8173	2.53929	-0.0998816	0.542161	-0.161476	0.301958	-0.222592	0.245577	-0.0547377	0.738457	4797.76	7352.29	6483.72	432.837	6003.04	4861.54	6060.4	6265.58	5849.19	5995.09	5045.29
DRN1	YGR093W	CWF19-like protein DRN1	P53255	Yes	No	10.7
DMA2	YNL116W	E3 ubiquitin-protein ligase DMA2	P53924	Yes	No	23.4	25.224	26.5961		27.0066	52.8646	25.9218					26.0944					26.1225	26.3333	25.7219	26.0756	16.9408	26.3597	26.9931	26.7416	21.4882	-0.353781		-0.18113		-0.212215	0.673891	0.422622	0.499279	304.279	787.601		70.8952	493.539				556.282
DLD1	YDL174C	D-lactate dehydrogenase [cytochrome] 1, mitochondrial	P32891	Yes	No	30.8	26.2903	26.7553	26.7662	26.852	16.1793	27.208	26.8154	27.1369	27.0702	11.3595	26.8425	26.9232	26.5495	26.8845	11.1682	27.1039	27.1231	27.0392	26.7748	10.6161	27.1523	27.105	27.4021	11.3616	0.391684	0.0430625	0.133977	0.414712	0.344282	0.0620628	0.553848	0.0220151	561.949	775.697	781.586	56.1725	1061.58	808.702	1010.57	964.896	824.041	871.427	672.551
DAL81	YIR023W	Transcriptional activator protein DAL81	P21657	Yes	No	3	19.7614					20.3158					20.1009			20.0471	2.63255		20.5569	21.028	20.3883	23.8755	21.2405	21.6745	21.3495	16.1122	0.554454		0.312608		0.896359		1.66013		3.6397				5.34531				4.60527
CYM1	YDR430C	Mitochondrial presequence protease	P32898	Yes	No	29.4	30.3406	30.4456	30.4121	30.0284	12.4563	30.5766	30.5188	30.6113	30.2318	11.3517	30.5221	30.2182	30.5852	31.4356	40.2649	31.0863	30.9713	30.7905	30.5715	15.2168	30.2599	31.3691	30.5154	42.7374	0.177949	0.21584	0.383603	0.216675	0.5482	0.00984882	0.408131	0.23501	5419.09	5828	5694.09	295.577	6381.99	6131.3	6537.42	5025.32	6145.25	4978.29	6420.25
CTI6	YPL181W	Histone deacetylase complex subunit CTI6	Q08923	Yes	No	8.3																						25.7917
CRZ1	YNL027W	Transcriptional regulator CRZ1	P53968	Yes	No	14.9	25.5303	26.2907	25.778		27.7512	26.3826	25.9213	26.6063		23.0963	26.156										26.0194	25.7987	26.3341	18.8627	0.437047	0.220585	0.289662				0.184426	0.535696	283.96	481.027	337.149		512.67	372.348	598.625		438.14
CPS1	YJL172W	Carboxypeptidase S	P27614	Yes	No	48.8	31.0493	30.3347	30.7977	30.2613	26.3474	30.7787	31.0014	30.8983	30.8807	6.32078	31.0592	30.85	31.1351	31.0911	8.44714	30.7408	30.8119	30.816	30.768	2.49981	30.4633	30.8892	30.8556	15.5875	0.279029	0.199953	0.42312	0.0772378	0.173426	0.394705	0.12531	0.63812	15380.7	9372.25	12918.8	603.214	12749.9	14877.5	13851.8	13684.3	15486.6	13395.7	16322.7
COX4	YGL187C	Cytochrome c oxidase subunit 4, mitochondrial	P04037	Yes	No	62.6	27.6292	28.1848	27.4214	28.066	24.3763	27.6792	27.3066	27.0142	26.8592	25.8747	27.3581	27.5131	27.2201	27.3235	8.51573	27.4961	27.3615	27.2476	27.1801	9.71559	27.3479	27.4594	26.7762	23.523	-0.610528	0.0536341	-0.471653	0.0476095	-0.504029	0.0399371	-0.630849	0.071743	5414.32	7958.34	4688.2	496.337	5605.5	4329.58	3535.39	3175.2	4486.85	4995.71	4077.63
COT1	YOR316C	Cobalt uptake protein COT1	P32798	Yes	No	15	28.1173	28.5353	28.28	28.9089	24.7772	27.7042	28.181	28.4594	28.3168	20.9788	28.142	28.238	27.7881		15.7291				28.1514		27.8714	26.8548	27.7567	33.8225	-0.29506	0.261238	-0.404361	0.144565	-0.309025		-0.9661	0.0353403	2703.42	3612.11	3026.25	316.918	2030.28	2825.42	3426.88	3104.33	2750.12	2939.43	2151.82
CKB2	YOR039W	Casein kinase II subunit beta	P38930	Yes	No	31.8	25.3749	26.0358	25.4915		25.7025	25.7091	26.421	26.2497	26.2485	19.6066	26.4173	25.8222	26.2294	26.2659	16.5458	26.0352	25.9472	26.4226	26.0612	15.3939	25.6056	25.9402	26.0002	14.1197	0.523048	0.0907394	0.549667	0.0602749	0.482519	0.0707507	0.214631	0.41779	651.883	1030.67	706.748		821.855	1346.12	1195.4	1194.43	1342.68	888.854	1178.74
CKB1	YGL019W	Casein kinase II subunit beta	P43639	Yes	No	34.9	27.82	27.7079	28.3778	27.6661	25.0267	27.5266	27.8593	27.4651	27.7896	13.3691	27.3767	27.2778	27.0931	27.2148	8.18799	27.5946	27.4932	27.5403	27.5799	3.12932	27.6263	28.0034	27.9595	13.6909	-0.232795	0.268982	-0.652329	0.00982327	-0.340939	0.0863991	-0.0298808	0.896808	3283.5	3037.95	4833.45	199.863	2679.18	3374.13	2567.49	3215.05	2414.92	2254.87	1983.82
CAR1	YPL111W	Arginase	P00812	Yes	No	52.9	30.0916	29.8238	30.0809	29.686	13.587	29.2772	29.779	29.5093	29.5106	14.3444	29.2501	28.9833	29.4598	29.3709	13.7917	28.9088	28.8277	28.7999	28.9897	5.98586	28.1181	28.6474	28.4063	18.1425	-0.40157	0.030881	-0.65457	0.00388206	-1.03906	7.41534e-05	-1.52999	0.000316386	14343.6	11914.1	14238.3	733.347	8156.31	11549.9	9580.26	9588.79	8004.74	6653.13	9257.44
BUD20	YLR074C	Bud site selection protein 20	Q08004	Yes	No	42.8	26.6634	26.616	26.9897	26.2618	20.4717																												2566.38	2483.32	3217.57	131.565
BRF1	YGR246C	Transcription factor IIIB 70 kDa subunit	P29056	Yes	No	13.8		28.1048																	27.5774		27.8566		27.6837	8.46437					-0.527475		-0.334679			1929.01
BRE1	YDL074C	E3 ubiquitin-protein ligase BRE1	Q07457	Yes	No	36.1	26.2583	27.4545	27.1604	27.0951	31.0148	27.0572	26.819	26.6216	27.7492	37.2563	27.2056	27.5831		26.8304	25.8784	27.0971	27.1618		26.7535	14.5574	27.1312	27.0961	27.2482	5.5856	0.0696728	0.851086	0.214313	0.571396	0.0120774	0.971512	0.166424	0.610167	444.75	1019.07	831.122	53.7941	773.775	655.977	572.089	1250.01	857.608	1114.09
BET2	YPR176C	Geranylgeranyl transferase type-2 subunit beta	P20133	Yes	No	8.3
BDH1	YAL060W	(R,R)-butanediol dehydrogenase	P39714	Yes	No	46.9	30.2165	30.3917	29.6474	30.3194	21.0258	29.9229	30.0935	29.9077	30.1199	7.70039	29.1883	29.2359	28.8619	29.0652	11.207	29.1451	29.0235	28.8197	29.0198	9.15268	29.1424	29.0179	29.0375	4.69261	-0.132756	0.484411	-1.05593	0.00138826	-1.14174	0.000767299	-1.07781	0.00316127	13414.3	15146.5	9041.98	975.588	10944.6	12317.6	10829.5	12545.6	6577.49	6798.02	5245.52
AZF1	YOR113W	Asparagine-rich zinc finger protein AZF1	P41696	Yes	No	3.5											23.7428																														62.0372
ASG1	YIL130W	Activator of stress genes 1	P40467	Yes	No	19	26.3787		26.2005	26.558	12.3686	26.4925			25.6333	40.9124		26.9119				26.3851						26.5568			-0.316188	0.429179	0.532864		0.00599734		0.177752		358.625		316.944	27.5002	388.053			213.909		518.979
ARO1	YDR127W	Pentafunctional AROM polypeptide;3-dehydroquinate synthase;3-phosphoshikimate 1-carboxyvinyltransferase;Shikimate kinase;3-dehydroquinate dehydratase;Shikimate dehydrogenase	P08566	Yes	No	76.2	32.7711	33.1384	32.8744	32.9317	10.9753	32.4666	32.8675	32.8812	32.8673	13.0564	32.5843	32.3987	32.6904	32.5347	8.33065	32.8142	32.8295	32.8349	33.0571	8.33712	33.1129	33.2736	33.0938	6.97267	-0.1582	0.26106	-0.376876	0.00858749	-0.0449845	0.657864	0.23121	0.0751655	18752.9	24189.4	20144.7	1419.49	15185.1	20048.7	20240.6	20046.2	16475.1	14486.1	17732.6
APN1	YKL114C	DNA-(apurinic or apyrimidinic site) lyase 1	P22936	Yes	No	31.3	26.084		25.8909		9.44888														25.9951		25.4385	25.8333	26.6009	42.4054					0.00761294		-0.0299087	0.950796	767.469		671.337
APJ1	YNL077W	J domain-containing protein APJ1	P53940	Yes	No	15.9	23.7457		22.8779	22.7541	40.2141	23.2554	22.5888	22.6468	23.0052	22.16	23.8683	23.8552	23.4383	23.6953	13.2617	24.4414	23.7672	24.5044	23.8185	26.8393	23.4775	24.1926	23.7412	25.6293	-0.251868	0.467332	0.588413	0.0952641	1.00699	0.0346885	0.677907	0.145243	106.793		58.519	3.63717	76.0215	47.8921	49.857	63.9179	116.268	115.213	86.3014
APE4	YHR113W	Aspartyl aminopeptidase 4	P38821	Yes	No	48.2	28.0481	28.1074	27.6766	28.0488	12.8088	27.1689	27.8076	28.0129	27.9974	24.1976	27.9026	27.2909	28.2408	28.3159	28.9352	27.4815	27.9398	27.6998	27.7823	13.0281	27.542	28.1601	27.7258	22.7226	-0.223536	0.351739	-0.0326862	0.901659	-0.24437	0.125701	-0.160915	0.442083	2290.48	2386.63	1770.53	155.201	1245.31	1938.81	2235.26	2211.41	2070.78	1355.16	2617.88
APE3	YBR286W	Aminopeptidase Y	P37302	Yes	No	51.8	31.6959	31.8853	31.5351	31.7466	9.96382	32.0383	32.3889	32.3637	32.2985	10.6037	32.34	32.347	32.3174	32.3557	1.13322	32.1031	32.1855	32.0994	32.1943	3.55686	32.0844	32.1385	32.0156	4.25812	0.556599	0.00211429	0.624304	0.000137802	0.429829	0.00137816	0.363747	0.0101646	25863.5	29490.8	23134.2	1814.17	32789.5	41810.7	41085.8	39271	40416.7	40615.2	39789.2
APE2	YKL157W	Aminopeptidase 2, mitochondrial	P32454	Yes	No	58.9	31.3553	31.4879	31.3022	31.2107	8.10633	31.6616	32.2076	32.0854	32.0513	15.3534	32.2574	31.9235	32.1646	32.0638	9.80481	32.0339	32.0222	32.0473	32.2818	8.95754	32.1507	32.3393	32.1697	7.33583	0.662459	0.00237074	0.763305	0.000166542	0.757289	0.000110627	0.880902	0.000143523	11399.1	12496.6	10987.1	698.327	14095.4	20580	18908.7	18465.9	21302.4	16901.2	19975
AMS1	YGL156W	Alpha-mannosidase	P22855	Yes	No	58	27.9884		25.999		84.5182	28.6438	29.6308	29.5867	29.3105	27.7382	30.2902	29.8876	30.3941	30.2027	14.4058	30.293	30.5122	30.5867	30.8361	15.6214	30.2118	31.0125	30.5615	28.022	2.29925	0.0301462	3.19995	0.00711524	3.56328	0.00486676	3.60154	0.0204315	956.242		240.831		1506.11	2985.4	2895.34	2391	4715.14	3566.91	5067.07
AMD1	YML035C	AMP deaminase	P15274	Yes	No	47	27.9229	28.4829	28.0083	28.1934	17.8118	27.812	28.1363	27.7365	27.9272	12.391	28.0307	27.9996	27.6186	28.1648	15.2928	28.5543	28.1244	28.4402	28.5093	12.6938	28.2065	28.4206	28.1496	10.1228	-0.248902	0.151455	-0.198482	0.288801	0.255129	0.156286	0.107004	0.538343	1219.42	1797.77	1293.79	99.6135	1129.19	1413.79	1071.64	1223.02	1313.97	1285.98	987.536
AKR1	YDR264C	Palmitoyltransferase AKR1	P39010	Yes	No	39.3	28.3968	28.5039	28.424	27.9878	14.8844	28.8437	28.8491	28.6934	28.9111	6.27473	29.0508	28.903	28.6844	28.9699	10.5457	29.148	29.1928	28.9037	29.3032	11.3041	29.2704	29.5847	29.3843	11.1709	0.496204	0.00726109	0.57388	0.00633363	0.808792	0.00131885	1.08499	0.000972139	1840.74	1982.62	1875.85	93.8907	2509.26	2518.53	2260.91	2629.26	2896.46	2614.47	2246.8
AIR1	YIL079C	Protein AIR1	P40507	Yes	No	18.1	24.9754	25.4593		25.0729	18.4059																												354.281	495.466		25.6693
AGE2	YIL044C	ADP-ribosylation factor GTPase-activating protein effector protein 2	P40529	Yes	No	43	27.155	27.447	27.6271	27.4677	13.1758	27.3768	27.2937	27.3	27.0343	9.92307	27.8001		27.8706	27.9708	5.97429	27.5701	27.1675	26.7464		28.1744	26.8753	26.3641	26.4438	19.8892	-0.172987	0.210888	0.456309	0.0140871	-0.262884	0.305731	-0.863149	0.00452368	2047.11	2506.29	2839.71	172.191	2387.39	2253.69	2263.55	1882.87	3201.36		3361.77
AFT1	YGL071W	Iron-regulated transcriptional activator AFT1	P22149	Yes	No	17.7	27.6595	26.5266	28.3421	27.6706	46.1427	27.5596	27.1991	27.2929	27.0831	14.5316	27.9402	28.2222	28.1351	28.1085	8.01479	28.1865	28.3204	28.0612	28.0432	9.07096	27.8398	28.1979	28.8482	36.4836	-0.266005	0.520616	0.551793	0.197838	0.603128	0.165434	0.745592	0.203145	1220.15	556.384	1958.4	83.2711	1138.54	886.798	946.367	818.308	1482.2	1802.26	1696.59
AFG3	YER017C	Mitochondrial respiratory chain complexes assembly protein AFG3	P39925	Yes	No	20.2	26.6629		26.6362		1.30977																26.8853	26.5418	26.7456	11.8216							0.0747082	0.603499	561.888		551.576
ADR1	YDR216W	Regulatory protein ADR1	P07248	Yes	No	11.9	28.9567	27.8724	27.6885	27.5743	51.1888	28.2358	29.8916	28.2972	28.4098	66.3159	29.6064	29.2404	28.1305	28.403	46.6176	28.7825	29.2198	27.8184	29.3465	39.8441	27.8037	27.0271		37.1696	0.685612	0.225324	0.822097	0.130771	0.768826	0.152683	-0.607611	0.317076	1543.18	727.809	640.724	40.0896	936.279	2950.25	977.007	1056.33	2421.07	1878.63	870.403
ADH6	YMR318C	NADP-dependent alcohol dehydrogenase 6	Q04894	Yes	No	54.7	30.0201	30.3788	30.4453	30.3358	12.3598	29.7796	30.1814	29.868	29.814	13.4571	29.3098	29.0316	29.3207	29.0979	10.137	28.5572	28.5414	28.5645	28.5981	1.66156	27.4167	28.0724	27.855	22.1608	-0.384208	0.0268037	-1.10497	9.11066e-05	-1.72966	1.77978e-06	-2.51361	5.15787e-05	12287.6	15755.6	16499.3	1035.67	10401.2	13741.1	11058.2	10652	7510.33	6192.87	7566.98
ADH5	YBR145W	Alcohol dehydrogenase 5	P38113	Yes	No	25.9	27.619	27.8788	28.076	27.252	23.6769			25.6846																	-2.02188								2447.93	2930.91	3360.33	128.543			640.441
ADH4	YGL256W	Alcohol dehydrogenase 4	P10127	Yes	Yes	64.4	30.2684	24.4464	26.1411		155.2	33.0728	32.9762	32.9835	33.0454	3.27769	33.3943	33.0973	33.378	33.2836	9.1484	33.7669	33.7204	33.6662	33.5797	5.52384	34.2042	33.9933	34.1266	7.31992	6.06749	0.00853994	6.33634	0.00719698	6.73132	0.00557683	7.15603	0.0144176	14054.4	248.433	804.23		98178.8	91817.2	92288.8	96330.3	122690	99861	121309
ADH3	YMR083W	Alcohol dehydrogenase 3, mitochondrial	P07246	Yes	Yes	49.6	30.6822	30.9356	30.9344	30.8592	8.0028	29.5062	29.5867	29.6359	29.6531	4.50641	29.0433	28.9677	28.8218	28.5264	15.0803	28.0853	28.3192	28.1722	28.2708	7.16803	27.0001	27.9871	26.7858	47.665	-1.25738	1.62868e-06	-2.01304	4.33805e-06	-2.641	4.83551e-08	-3.59517	9.38483e-05	19081.4	22746.2	22726.3	1460.93	8445.27	8929.36	9239.36	9350.44	6126.9	5814.47	5255.17
ADA2	YDR448W	Transcriptional adapter 2	Q02336	Yes	No	18.9	27.3565																																1519.28
ABF1	YKL112W	ARS-binding factor 1	P14164	Yes	No	54.4	28.8437	29.1492	28.6473	28.7958	15.1451	28.714	28.7548	28.7487	29.0713	12.2079	28.9535	28.887	28.8971	28.7662	5.37462	29.3294	29.0022	29.0215	29.1266	10.7361	29.3058	29.0982	29.1993	7.1959	-0.036778	0.793625	0.01695	0.885181	0.260959	0.0901959	0.342117	0.0515353	2634.65	3255.97	2299.29	172.592	2408.12	2477.2	2466.75	3084.85	2842.9	2714.87	2733.96
AAP1	YHR047C	Alanine/arginine aminopeptidase	P37898	Yes	No	37.6	28.5316	29.4085	28.5958	29.0654	29.3951	28.2563	28.7946	28.5375	28.7999	17.0878	27.5843	28.1013	28.5058	28.3181	25.4847	28.5205	28.2206	28.3754	28.4198	8.52794	28.7719	29.0539	28.9348	9.72693	-0.303285	0.260142	-0.772955	0.0359685	-0.516251	0.0541892	0.0198926	0.940685	1776.41	3262.34	1857.21	174.172	1467.8	2131.62	1783.64	2139.45	921.235	1318.29	1744.96
AAH1	YNL141W	Adenine deaminase	P53909	Yes	No	41.2	27.6602	28.2035	28.532	28.0423	24.6995	26.6891	27.0086	26.8845	27.1049	12.1592	26.6055	26.8132	26.389	26.8361	14.0023	26.553	26.3302	26.8789	26.1341	22.6494	25.943	26.336	25.9244	16.7817	-1.18771	0.00107633	-1.44852	0.000447958	-1.63544	0.000507038	-2.04171	0.000383635	2392.55	3486.74	4378.33	211.165	1220.53	1523.06	1397.51	1628.2	1151.83	1330.17	991.323
	YOL098C	Uncharacterized protein YOL098C	Q12496	Yes	No	33.8	28.6764	29.1575	28.7143	28.5943	18.8251	29.1146	28.7789	29.0108	28.8625	10.4119	29.1993	28.7099	28.8277	28.8296	15.5607	28.8567	28.7027	28.6794	28.8874	7.32045	28.5462	28.874	28.797	11.5392	0.156105	0.329141	0.106014	0.544786	-0.00405247	0.97737	-0.0465228	0.79645	1620.06	2261.26	1663.22	103.646	2195.1	1739.4	2042.64	1843.21	2327.8	1658.13	1799.25
	YBR074W	Probable zinc metalloprotease YBR074W	P38244	Yes	No	6.8																						25.5478
	YOL057W	Probable dipeptidyl peptidase 3	Q08225	Yes	No	51.5	29.3135	29.8761	29.5609	29.4892	16.814	30.2024	30.2293	30.302	30.2204	3.07082	30.5187	30.1505	30.1051	30.1992	13.7159	30.2363	30.1589	30.2973	30.5481	12.1181	30.4323	30.8345	30.1973	22.8044	0.678625	0.00128577	0.683443	0.00390631	0.75024	0.00203516	0.928126	0.00672137	3705.19	5472.1	4398.19	283.407	6861.15	6989.99	7351.51	6947.23	8542.71	6618.47	6413.55
	YNL040W	Putative alanyl-tRNA editing protein alaX	P53960	Yes	No	15.4														26.3532		26.2166		26.257	26.2628	1.73592
	YNL247W	Cysteine--tRNA ligase	P53852	Yes	No	60.2	31.205	31.1838	31.2611	31.1514	3.21576	30.986	31.1807	31.0501	30.9046	8.1667	30.8239	30.7315	30.9357	30.9328	6.70396	30.8157	30.874	30.8897	30.8268	2.48635	30.5584	30.7857	30.7345	8.09916	-0.16998	0.0350235	-0.34436	0.000708812	-0.348795	2.09249e-05	-0.507505	0.000503784	12644.2	12459.8	13145.8	825.062	10863.6	12432.8	11357	10267.5	9708.69	9106.46	10491.2
	YBR062C	Uncharacterized RING finger protein YBR062C	P38239	Yes	No	15.6	24.5585																																536.357
	YCR087C-A	UPF0743 protein YCR087C-A	P37263	Yes	No	22.2	26.8097	26.1127	26.7872	26.2495	24.4799																												2964.92	1828.88	2919.04	136.176
YER010C	YER010C	4-hydroxy-4-methyl-2-oxoglutarate aldolase	P40011	No	No	34.2		26.6181	26.6887		3.46237	26.2531	25.9893	26.5747	26.2847	16.6926	26.7607	26.9448	26.9179	27.2575	14.9536	27.0623	27.0619	27.1655	26.9929	4.97338	27.1662	27.2954	27.0158	9.65247	-0.377946	0.1049	0.316823	0.11465	0.417244	0.00192418	0.505779	0.018202		1801.46	1891.88		1398.77	1165.07	1748.11	1429.8	1988.6	2259.34	2217.54
VPS29	YHR012W	Vacuolar protein sorting-associated protein 29	P38759	No	No	38.7	26.3173	26.5406	26.5246	25.9946	16.6569	26.2706	26.5754	26.7196	26.7456	14.3029	25.8373	26.3117	26.1429	26.1566	13.2424	26.3265	26.315	26.5231	26.2179	9.08364	26.5725	26.2961	26.5382	10.1287	0.233502	0.212744	-0.232177	0.200151	0.00135063	0.992737	0.124667	0.489276	1205.53	1407.28	1391.8	65.2783	1167.1	1441.65	1593.2	1622.18	864.316	1200.8	1068.21
VMA1	YDL185W	V-type proton ATPase catalytic subunit A;Endonuclease PI-SceI	P17255	No	No	83.2	35.0354	34.8522	34.9249	34.8348	6.42247	34.7923	35.1096	35.0315	34.9896	9.10132	34.9998	34.8585	34.9934	34.9037	4.7756	34.9094	34.9857	35.0048	35.0081	3.15469	35.0583	35.044	34.9692	3.28758	0.0689529	0.430006	0.0270435	0.653221	0.0652142	0.248942	0.11203	0.114463	132700	116872	122913	7820.46	112120	139709	132342	128558	129467	117389	128890
VEL1	YGL258W	Protein VEL1	P53058	No	Yes	16						31.8735	31.5066	31.3722	31.0751	23.267	32.9464	33.1128	31.9471	32.7029	31.089	32.4027	33.0764	32.839	32.9144	18.6427	33.4185	33.255	32.8614	19.0166													79406	61578.4	56100.7	45658	167043	187470	83563.7
TED1	YIL039W	Protein TED1	P40533	No	No	27.1	27.8154	27.9537	28.1647	28.169	11.7389	27.848	28.0441	28.1377	27.948	8.61845	28.4109	27.721	28.0421	28.1655	19.487	28.1639	27.9039	28.1085	28.3594	12.9485	28.2356	28.2183	28.1868	1.7087	-0.0312848	0.778619	0.0591609	0.735884	0.10821	0.428032	0.187852	0.127008	1922.62	2116.02	2449.18	166.366	1966.49	2252.77	2403.76	2107.63	2905.09	1800.76	2249.67
SPT16	YGL207W	FACT complex subunit SPT16	P32558	No	No	51.9	30.8613	31.1581	30.99	31.0246	8.46285	31.1551	31.2064	31.0989	31.0419	4.91501	31.2547	31.2007	31.2181	31.1915	1.94653	31.1234	31.1135	31.124	31.2661	5.18774	31.0774	31.1305	30.9743	5.45652	0.117085	0.148174	0.207746	0.0159978	0.148251	0.0821092	0.0522329	0.550868	7351.82	9030.82	8037.37	557.532	9012.36	9338.36	8667.89	8331.71	9656.45	9301.42	9414.11
SIT4	YDL047W	Serine/threonine-protein phosphatase PP1-1	P20604	No	No	28.3		26.2779	26.1806	26.6886	19.4392	26.1792	26.1946	26.684	26.3345	17.22	26.9445			26.0006	44.6783						26.2419	26.6455	26.6495	15.4085	-0.0342656	0.864208	0.0902034	0.838099			0.129989	0.562638		1023.65	956.867	92.1548	955.961	966.215	1356.49	1064.61	1624.85
RNH70	YGR276C	RNA exonuclease 1	P53331	No	No	16.6																					25.5388	24.0753		66.1522
REX4	YOL080C	RNA exonuclease 4	Q08237	No	No	13.8																						23.4825
REX2	YLR059C	Oligoribonuclease, mitochondrial	P54964	No	No	51.7	26.1589		27.1534	26.8682	32.5865	26.6613	27.2208	26.9644	26.916	15.8825	27.8736	27.5438	27.8115	27.2618	18.6011	27.6306	27.9353	27.9749	27.908	10.3286	27.5715	28.1659	27.7203	22.265	0.213766	0.482779	0.895795	0.029784	1.13534	0.00773588	1.09237	0.0341008	1085.13		2162.04	120.152	1537.09	2265.31	1896.56	1834	3561.54	2833.77	3411.64
PPZ1	YML016C	Serine/threonine-protein phosphatase PP-Z1	P26570	No	No	24.4	27.4016	26.7497	27.0416	26.0014	37.2738	26.6136	26.6629	26.0975	26.7027	17.7797	27.193	26.448	26.7566	26.7445	21.9756	27.1533	27.2673	26.968	27.3853	12.1181	27.1075	27.5399	27.0317	19.8316	-0.279416	0.428769	-0.0130414	0.970169	0.394926	0.25019	0.427789	0.306637	1022.97	651.053	797.026	26.2471	592.433	613.031	414.259	630.167	885.245	528.21	654.169
PPT1	YGR123C	Serine/threonine-protein phosphatase T	P53043	No	No	38.4	27.3116	28.0047	27.0891	27.4982	28.6033	27.2162	27.4858	27.4015	27.4615	8.17366	26.9544	27.0971	27.66	27.0847	23.7053	27.0672	27.2574		27.2844	8.01157	26.5669	26.9585	26.8056	13.4474	-0.0846818	0.693064	-0.276912	0.311181	-0.272948	0.303013	-0.698921	0.0380616	1284.22	2076.27	1100.66	98.9786	1202.04	1448.97	1366.78	1424.76	1002.52	1106.75	1634.91
PPN1	YDR452W	Endopolyphosphatase	Q04119	No	No	27.2	27.6917	27.9015		27.6987	8.44685	27.3048	27.8469	28.0005	27.6962	19.5462	28.2631	28.2943	28.5441	28.2328	10.3165	27.9043	27.8681	28.3159	28.1884	15.1973	27.8966	28.0467	27.7683	9.68355	-0.0518404	0.791414	0.569595	0.0025527	0.305218	0.0831519	0.139927	0.25676	1237.14	1430.83		84.1917	946.143	1377.7	1532.47	1241.07	1838.36	1878.53	2233.67
PPH22	YDL188C	Serine/threonine-protein phosphatase PP2A-2 catalytic subunit	P23595	No	No	23.1	27.8439	27.5458	27.7469	27.5642	10.0872	27.4049	27.7882	28.0113	27.9846	18.0864	28.2654	27.7582	27.8995	27.5548	21.4703	28.244	28.0513	28.1927	28.1712	5.56358	28.0504	28.4171	28.4215	14.0882	0.122055	0.467745	0.194286	0.286869	0.48961	0.0010528	0.621113	0.00561754	2502.09	2035.12	2339.44	139.589	1845.67	2407.47	2809.94	2758.53	3351.08	2357.93	2600.55
PPH21	YDL134C	Serine/threonine-protein phosphatase PP2A-1 catalytic subunit	P23594	No	No	18.2	26.008	26.8252	26.7641	26.9294	25.2121	26.8276	27.3581	27.4571	26.9336	21.2562	27.0979	27.2234	27.4295	27.213	9.77606	26.944	27.3019	27.504	26.7985	22.4142	27.31	27.0843	27.1142	8.68288	0.512423	0.0977962	0.609281	0.0333595	0.505434	0.105698	0.537802	0.089861	719.431	1267.6	1215.04	92.2783	1269.74	1834.03	1964.31	1366.54	1531.36	1670.59	1927.1
PGM2	YMR105C	Phosphoglucomutase-2	P37012	No	No	80	29.9321	29.8711	29.9385	29.5958	10.6483	32.7646	33.2707	33.1242	33.0017	14.5178	33.111	32.8232	33.1237	33.0015	9.34977	32.8128	32.8542	32.8382	32.9596	4.55336	32.5375	32.6529	32.566	4.20525	3.20592	3.54251e-07	3.18047	9.46598e-08	3.03184	3.76207e-08	2.75111	1.1939e-06	7259.75	6959.2	7291.64	389.407	51710.5	73440.8	66348.3	60945.3	65744.5	53853.5	66324.2
NMD3	YHR170W	60S ribosomal export protein NMD3	P38861	No	No	30.7	28.6661	29.0899	28.4433	28.9521	19.667	28.2938	28.1263	27.8703	28.1576	11.8825	27.7268	27.5137	27.4994	27.0129	19.5236	27.4185	27.4956	27.837	27.7985	14.5219	27.5643	27.7321	27.9573	13.7686	-0.675839	0.00725654	-1.34968	0.000657494	-1.15043	0.000675264	-1.03657	0.00322642	3222.53	4322.88	2761.47	266.093	2489.56	2216.74	1856.32	2265.32	1680.49	1449.74	1435.44
MRE11	YMR224C	Double-strand break repair protein MRE11	P32829	No	No	4.8	23.6443																				23.0367										-0.607581		75.4907
MMT2	YPL224C	Mitochondrial metal transporter 2	Q08970	No	No	12																24.1204			24.1545	1.67433	24.5865	24.8374	24.4491	13.8686
MCD4	YKL165C	GPI ethanolamine phosphate transferase 1	P36051	No	Yes	14.7	26.5941		27.0882	26.6399	19.8006	27.4441	28.8053	28.6599	28.3675	35.4254	29.1813	28.5985	29.2239	28.7992	20.4252	29.0393	29.0238	29.1753	29.4134	12.9697	29.0221	29.2278	28.9245	10.9067	1.54515	0.0101722	2.17668	0.00018944	2.3889	3.24783e-05	2.28409	0.000228127	428.523		603.571	29.9575	772.442	1984.36	1794.09	1465.02	2575.24	1719.38	2652.36
MAP2	YBL091C	Methionine aminopeptidase 2	P38174	No	No	56.3	29.6426	30.1509	30.0979	29.9478	15.0114	30.2012	30.1422	30.107	30.08	3.65058	30.1076	30.1814	30.5114	30.2673	12.6037	29.9983	30.2878	30.3103	30.1707	9.62144	29.9091	29.9091	29.9993	3.64394	0.172835	0.190418	0.30714	0.076878	0.232005	0.135591	-0.0205944	0.886693	7885.73	11216.4	10811.8	659.881	11614.4	11149.6	10880.5	10679.1	10885.2	11456.3	14400.4
LAP4	LAP4	Vacuolar aminopeptidase 1	P14904	No	No	52.3	29.8405	29.7134	29.9289	29.7123	7.38666	30.6347	30.7413	30.7337	30.8231	5.32332	31.2473	31.0086	30.823	30.6752	17.3828	30.8209	30.8071	30.5723	30.8081	7.974	30.8793	30.9381	30.7091	8.09322	0.934394	7.33745e-06	1.13972	0.00014627	0.953295	2.10408e-05	1.04336	6.3006e-05	7528.68	6893.81	8004.18	466.506	13055.3	14056.1	13982.5	14876.8	19961.5	16917.6	14875.2
GLC7	YER133W	Serine/threonine-protein phosphatase PP1-2	P32598	No	No	59.3	30.2021	30.0458	30.102	29.827	10.676	30.2782	30.8486	30.6465	30.7765	16.4715	30.649	30.6416	30.6591	30.7846	4.80163	30.6639	30.7122	30.7898	30.9454	8.72191	30.3362	30.9935	30.7843	22.2146	0.593225	0.00740363	0.639359	0.000309255	0.733578	0.000335166	0.660401	0.0168419	15380	13801.2	14349	803.122	16213	24076.1	20928.4	22901.9	20964.5	20857.4	21112.7
FMN1	YDR236C	Riboflavin kinase	Q03778	No	No	39	25.2013					26.3881	26.2125	26.3216	26.5685	10.5153	26.696		26.4616		11.4636	25.824	26.4887	26.3666	26.0953	19.87	26.9446	26.444	26.5633	18.756	1.17141		1.37757		0.992357		1.44934		702.938				1600.24	1416.86	1528.16	1813.43	1981.01		1683.93
DCR2	YLR361C	Phosphatase DCR2	Q05924	No	No	7.4
CNA1	YLR433C	Serine/threonine-protein phosphatase 2B catalytic subunit A1	P23287	No	No	29.1	25.7458		26.3774	25.9665	22.7578			26.0685	26.519	21.899	26.5005	26.206	26.5529	26.6846	13.4494	26.278	26.5986	27.1587	26.5082	27.7754	26.3563	26.5362	26.4576	6.22216	0.263837	0.432803	0.456093	0.0670801	0.605938	0.0747648	0.420136	0.0941583	399.32		618.641	31.5125			499.417	682.425	673.746	549.342	698.69
CMP2	YML057W	Serine/threonine-protein phosphatase 2B catalytic subunit A2	P14747	No	No	32	27.3344	28.1427	27.3144	27.5345	29.5263	27.697	27.3012	27.178	27.083	19.8541	27.5414	27.7887	27.6798	28.3093	25.0804	28.0959	27.0798	27.9362	27.6744	27.9668	28.5239	28.1394	27.9504	20.7834	-0.2667	0.30155	0.248277	0.369696	0.115058	0.710385	0.623057	0.0684019	1104.12	1933.49	1088.91	85.8947	1419.57	1079	990.657	927.567	1274.47	1512.74	1402.73
CDC1	YDR182W	Cell division control protein 1	P40986	No	No	43.4	27.127	26.7912	27.3959	27.2956	17.4354	26.6464	26.8882	26.8006		8.38429	27.8641	26.7412	27.4477		36.7659	27.2172	27.0449	26.6893	27.0243	14.673	26.867	26.5353	27.0122	16.3701	-0.374044	0.076065	0.198613	0.557143	-0.158518	0.393594	-0.347565	0.136924	1146.7	908.552	1381.64	87.2846	821.789	971.767	914.498		1911.38	877.649	1432.18
ZWF1	YNL241C	Glucose-6-phosphate 1-dehydrogenase	P11412	No	No	75	31.5935	31.5543	31.8809	31.6606	10.4781	31.7342	31.8579	31.9039	31.8859	5.18844	31.8089	31.7615	32.0634	31.8622	9.50321	31.7875	31.8013	31.8695	31.9636	5.6562	31.5092	31.6441	31.5806	4.66896	0.173115	0.0802143	0.201637	0.0868511	0.183122	0.0702076	-0.094356	0.353144	25186.7	24511.2	30738.7	1786.93	27766.4	30252.2	31231.5	30844.4	29241.7	28297.3	34882.4
ZUO1	YGR285C	Zuotin	P32527	No	No	77.6	32.4902	32.4569	32.058	32.5114	13.8265	32.2586	32.4847	32.3419	32.4174	6.72752	32.2132	32.1724	32.3159	32.3717	6.35962	32.3117	32.3366	32.4386	32.4817	5.6314	32.0871	32.376	32.3056	10.1872	-0.00346551	0.977551	-0.110791	0.380148	0.0130534	0.913349	-0.122883	0.440368	55024.1	53770	40779.2	3781.53	46862.8	54814.4	49650.2	52318	45413.5	44147.6	48761.8
ZTA1	YBR046C	Probable quinone oxidoreductase	P38230	No	No	44.6	27.0923	27.5821	27.9424	27.6579	23.2081	27.3035	27.7624	27.9401	28.0229	20.5097	28.1011	26.8558	28.0494	28.0478	33.1541	27.9046	27.8079	27.9311	27.8625	3.70406	28.0023	28.5762	27.9024	26.5852	0.188531	0.459985	0.194828	0.598529	0.30783	0.135807	0.591595	0.0825113	1728.2	2426.78	3115.21	173.214	2000.56	2749.86	3110.26	3293.96	3477.55	1466.84	3355.08
ZRG8	YER033C	Zinc-regulated protein 8	P40021	No	No	2.7									23.1444																															34.7332
ZEO1	YOL109W	Protein ZEO1	Q08245	No	No	90.3	31.7844	31.9528	31.5442	31.8516	11.6448	31.7326	31.4214	31.6152	31.5763	8.82044	32.3878	32.3851	32.2508	32.426	5.20416	32.4667	32.316	32.3081	32.3695	5.14343	32.5067	32.0934	32.365	14.2063	-0.19688	0.1183	0.579175	0.00088601	0.581832	0.000830123	0.538442	0.0136008	131365	147624	111211	9320.41	126727	102137	116825	113718	199582	199198	181491
ZDS1	YMR273C	Protein ZDS1	P50111	No	No	8	25.6777		25.5135		8.04192		25.9123		25.7102	9.88733			27.121	26.0662	49.5116	26.5773	26.0408	26.4231	26.2071	16.271	26.8482		25.9051	44.6444	0.215608	0.239565	0.99799	0.202437	0.716448	0.0176651	0.781007	0.244322	232.177		207.192			273.157		237.458			631.365
YVH1	YIR026C	Tyrosine-protein phosphatase YVH1	Q02256	No	No	34.9	25.6311		25.9318	25.5203	15.1535	25.8179																			0.123519								564.152		694.898	35.3797	642.139
YVC1	YOR087W	Calcium channel YVC1	Q12324	No	No	15.3											25.9503			26.4646	24.9454						25.9873	25.7863	26.1415	12.2262																	371.873
YUH1	YJR099W	Ubiquitin carboxyl-terminal hydrolase YUH1	P35127	No	No	19.5
YTP1	YNL237W	Protein YTP1	P53584	No	No	4.8
YTM1	YOR272W	Ribosome biogenesis protein YTM1	Q12024	No	No	37.4	28.6172	28.6515	28.5038	28.6794	5.24538	28.1539	28.6293	28.1767	28.2882	16.1053	28.4844	28.1453	28.2956	27.9127	16.5477	28.3297	28.2107	28.2508	28.228	3.69175	27.681	27.9232	27.876	8.69407	-0.300968	0.0413606	-0.403492	0.0190458	-0.358156	0.000255951	-0.786214	0.000154557	3584.38	3670.82	3313.46	253.444	2599.88	3614.59	2641.32	2853.47	3269.24	2584.38	2868.18
YTA7	YGR270W	Tat-binding homolog 7	P40340	No	No	27.2	28.0816	28.2896	28.1284	28.7207	21.596	28.0802	28.3608	28.1713	28.419	10.932	28.0329	28.9695	29.1131	28.9821	28.8242	28.8152	28.3736	28.6269	28.6573	12.359	28.9892	29.0089	28.823	6.93511	-0.0472145	0.78538	0.469315	0.155123	0.313202	0.11822	0.635333	0.0164459	806.791	931.907	833.405	85.0952	806.053	979.113	858.542	1019.42	780.007	1492.95	1649.23
YTA6	YPL074W	Probable 26S protease subunit YTA6	P40328	No	No	15.4								26.6403			26.8595		26.7081	27.1581	16.1994	26.4419	26.8634			20.5111	26.5215	26.2323	26.025	17.4581															548.26		638.204		574.625
YSY6	YBR162W-A	Protein YSY6	P38374	No	No	13.8													23.2235	23.4801	12.5438	24.4677																											594.595
YSP2	YDR326C	GRAM domain-containing protein YSP2	Q06681	No	No	6.7	26.616	27.1747	27.6139	25.9408	46.5904	25.9608	27.0614	26.8746	26.873	28.968		26.8782	27.6418	26.3225	46.2057	26.2548	26.2972	26.7304	26.539	15.6663	26.8808	26.3178		27.2491	-0.143896	0.75391	0.111162	0.843402	-0.380995	0.352767	-0.237087	0.698416	286.36	421.813	571.884	12.1451	181.845	389.933	342.573	342.212		343.437	583.077
YSC84	YHR016C	Protein YSC84	P32793	No	No	25.2	26.5785	27.2127	26.7256	27.4456	28.1011	27.6492	27.6773	27.5592	27.732	4.95996	27.2723	27.8689	27.801	28.2166	25.7534	27.8979	27.4556	27.8501	27.6115	14.1185	27.7886	27.5086	27.4406	13.1476	0.66382	0.0182884	0.799113	0.0297268	0.713177	0.0204985	0.588676	0.0703031	880.205	1366.2	974.716	108.732	1848.95	1885.22	1737.04	1958.04	1423.82	2152.95	2054.04
YSC83	YHR017W	UPF0744 protein YSC83	P32792	No	No	15.8											24.7027					25.5034	25.0153		24.5588	32.4836	24.1985		24.7586	27.1134																	275.988
YSA1	YBR111C	ADP-ribose pyrophosphatase	Q01976-2	No	No	59.9	28.9165	29.0256	29.148	28.8296	9.61088	29.5305	29.5223	29.3905	29.3788	5.68337	29.7474	29.4965	29.6003	29.6514	7.23157	29.3659	29.6384	29.5952	29.6405	8.699	29.4671	29.7227	29.3803	12.6363	0.475574	0.00102552	0.643932	0.000302516	0.580046	0.000884708	0.543421	0.0059167	9547.9	10298.3	11210	608.808	14613	14530.5	13261.5	13154.1	16983.6	14272.5	15337
YRO2	YBR054W	Protein YRO2	P38079	No	No	20.6		27.2189		26.4098	38.6471	26.4065	26.2687	26.0797	26.3335	9.44855	26.5796	26.8305	26.9465	26.7498	10.5417	26.9961	27.1	26.7817	26.7478	11.8171	27.0188	27.0235	27.0783	2.30599	-0.54227	0.114112	-0.0377737	0.896779	0.092026	0.757619	0.22581	0.509587		1803.78		69.721	1027.14	933.564	818.935	976.438	1158.06	1378.04	1493.39
YRB30	YGL164C	Ran-specific GTPase-activating protein 30	P53107	No	No	24.8	27.437		28.2671		39.6016																												1615.18		2871.59
YRB2	YIL063C	Ran-specific GTPase-activating protein 2	P40517	No	No	45.3	27.637	27.502	27.75	27.59	7.20091	27.2416	27.9131	27.4721	27.4543	20.5861	27.6893	27.7439	27.7157	27.9155	7.28553	27.8476	27.8283	27.9437	27.8451	3.69086	27.683	27.8452	28.0459	12.6567	-0.0994842	0.532279	0.146344	0.0904436	0.246414	0.00534985	0.238275	0.076412	2588.27	2357.12	2799.2	169.666	1967.86	3134.15	2308.76	2280.36	2683.75	2787.42	2733.48
YRB1	YDR002W	Ran-specific GTPase-activating protein 1	P41920	No	No	66.2	30.7745	30.9971	30.7818	30.6014	11.3479	30.1481	30.718	30.7182	30.8733	20.0511	30.429	30.2608	30.8549	30.7242	18.5665	30.7358	30.6244	30.7293	30.7915	4.77488	30.688	31.0618	31.07	14.4134	-0.174315	0.367916	-0.221483	0.210253	-0.0684771	0.46702	0.15123	0.337019	35776.5	41746.7	35959.6	2149.02	23175.7	34403.2	34407.1	38314.6	28158.4	25059.3	37827.6
YRA2	YKL214C	RNA annealing protein YRA2	P36036	No	No	49.3	28.3416	27.5764	28.2045	28.4255	23.6128	28.7727	29.0267	28.4454	28.6512	16.9927	29.3329	29.1641	29.4972	29.5154	11.0969	29.4246	29.4216	29.1908	29.4951	8.84849	29.3157	29.3189	29.4341	4.73885	0.586958	0.0417437	1.24037	0.00102461	1.24599	0.00086561	1.21922	0.00318349	6396.24	3763.36	5816.15	459.11	8623.35	10283.9	6873.1	7926.86	12715	11311.1	14249.4
YRA1	YDR381W	RNA annealing protein YRA1	Q12159	No	No	66.8	31.9852	31.6485	32.2353	31.6195	20.8029	31.7929	31.6836	31.7115	31.62	4.99173	31.5543	31.7635	31.7405	31.6307	6.71319	31.5915	31.5503	31.5849	31.5063	2.68867	31.4663	31.3429	31.4187	4.29153	-0.170122	0.303178	-0.199864	0.243852	-0.313878	0.0782928	-0.462823	0.0467539	76164.5	60308.9	90578	4003.1	66660.1	61795.9	63001.6	59128.2	56498.1	65314.6	64280.8
YPT7	YML001W	GTP-binding protein YPT7	P32939	No	No	71.6	28.4382	27.3313	28.0181	28.1276	29.3611	28.987	28.4732	28.8187	28.8819	14.5582	29.4739	29.6013	29.1676	28.5784	28.5067	28.8039	29.3421	29.2042	28.884	17.7736	29.3909	29.6254	29.4223	9.02182	0.811414	0.020121	1.2265	0.00940618	1.07975	0.0066882	1.50075	0.00318293	7057.22	3276.66	5274.24	385.345	10323.8	7230.5	9186.95	9598.49	14468	15803.1	11700.7
YPT6	YLR262C	GTP-binding protein YPT6	Q99260	No	No	26.5	25.6273	26.6044			46.1416	26.606	27.1473	27.2607	26.7274	21.7691	27.0118		26.5318		23.3111	26.8598	26.7336	26.9139	26.7699	5.72389	27.1367	27.2911	26.911	13.0581	0.819505	0.0987513	0.655953	0.35142	0.703454	0.0826996	0.997083	0.0839511	949.241	1868.63			1870.64	2722.45	2944.97	2034.93	2478.32		1776.91
YPT52	YKR014C	GTP-binding protein YPT52	P36018	No	No	62.4	28.0651	28.4857	28.4367	28.4357	12.6405	28.3152	28.3394	28.449	28.5376	7.19689	28.4642	28.4538	28.9139	28.7035	15.5782	28.5561	28.7144	28.7533	28.8431	8.16657	28.7593	28.9399	28.7886	6.83158	0.0545071	0.638822	0.278057	0.107122	0.360935	0.0197737	0.473464	0.0126323	4804.74	6430.78	6216.41	420.678	5714.26	5810.75	6269.62	6666.37	6335.83	6290.49	8653.25
YPT32	YGL210W	GTP-binding protein YPT32/YPT11	P51996	No	No	20.3	24.6757	25.9049	26.0827	26.0633	36.2698	25.7066	26.8368	26.6003	26.0203	34.7898	25.8246			25.6195	10.0328	26.1616	26.536	26.3558	26.2618	11.2246	26.2509	26.2768	26.217	2.07492	0.609334	0.202457	0.0403832	0.940734	0.647139	0.111397	0.566598	0.215608	488.667	1145.58	1295.86	86.5872	998.486	2185.51	1855.11	1240.98	1083.55
YPT31	YER031C	GTP-binding protein YPT31/YPT8	P38555	No	No	45.7	29.2757	30.3937	29.7639	29.7496	32.8892	29.7877	30.2284	30.145	30.1886	13.1294	30.1914	30.1422	29.9771	29.8812	9.90475	30.2215	30.1257	30.2476	30.4054	8.16614	30.2784	30.4453	30.2537	7.35813	0.291721	0.288799	0.252269	0.334403	0.454332	0.103186	0.530097	0.112817	11875.1	25774.3	16657.7	1116.97	16934.9	22984.2	21694.2	22359.3	22403.1	21652.1	19309.7
YPT10	YBR264C	GTP-binding protein YPT10	P38146	No	No	36.7	24.6556																																541.165
YPT1	YFL038C	GTP-binding protein YPT1	P01123	No	No	84	29.285	29.5688	29.2328	29.464	10.8818	29.3755	30.002	30.025	29.6726	20.3569	29.8662	29.3362	29.647	29.9633	18.4153	30.0431	30.2166	30.0647	30.291	8.3342	30.1241	30.0784	30.3433	10.0449	0.381117	0.0691895	0.315537	0.0952328	0.766191	0.000235835	0.794267	0.00097281	12598.7	15336.9	12150.7	965.91	13414.4	20708	21041.2	16481.7	18848.9	13053.4	16191.6
YPS1	YLR120C	Aspartic proteinase 3;Aspartic proteinase 3 subunit alpha;Aspartic proteinase 3 subunit beta	P32329	No	No	2.1						24.6857						25.4459	25.4684	25.29	6.60621	25.8334	25.3263		25.4794	18.523			24.9898														201.05					340.538	345.895
YPR174C	YPR174C	Nuclear envelope protein YPR174C	Q06616	No	No	17.6			23.0143																		24.2775	24.9887		34.166							1.61878				149.066
YPR172W	YPR172W	Pyridoxamine 5-phosphate oxidase homolog	Q06608	No	No	45.5	25.8509	26.7954	25.8167	26.6512	34.981	25.9613	26.4848	26.8287	26.7052	24.2515	25.9867	25.9075	27.0802		49.3036	27.1412			26.6988	21.5145	26.9248	26.6927	27.0866	13.5261	0.216442	0.526232	0.0462596	0.920398	0.641476	0.193413	0.622821	0.109616	1202.23	2313.64	1174.04	141.78	1297.8	1865.53	2367.67	2173.39	1320.88	1250.3	2818.6
YPR170W-B	YPR170W-B	Uncharacterized protein YPR170W-B	P0C5R9	No	No	9.4			23.5921																																603.949
YPR148C	YPR148C	Uncharacterized protein YPR148C	Q06523	No	No	65.1	28.4049	28.8171	27.9999	28.8156	25.3339	29.1846	29.0887	28.9561	29.2921	9.83663	29.2416	29.1748	29.2867	28.9489	9.98989	29.4572	29.3917	29.0531	29.3262	11.7373	29.538	29.9378	29.5584	16.2309	0.620994	0.0245457	0.653594	0.0205656	0.797653	0.00992054	1.16869	0.0059954	3224.62	4290.94	2435.3	290.28	5535.89	5179.88	4724.79	5963.85	5758.81	5498.15	5941.63
YPR147C	YPR147C	Uncharacterized protein YPR147C	Q06522	No	No	19.1			24.7839				25.8215				25.19	25.5448	24.8571	25.0696	20.5806						25.5615	26.7496	26.9384	43.1582	1.03756		0.381461				1.63259				370.679			760.914			491.172	628.141	389.979
YPR127W	YPR127W	Putative pyridoxal reductase	Q06494	No	No	53.9	28.6095	28.6169	28.7593	28.2808	13.4021	29.7222	29.7814	29.8023	29.7753	2.34396	30.4745	30.3498	30.6529	30.4928	8.69714	30.5087	30.5867	30.4968	30.4436	4.11994	30.1782	30.1661	30.1234	1.98764	1.20367	2.33132e-05	1.92589	3.51718e-06	1.94234	1.65734e-06	1.58929	4.50663e-05	4743.71	4768.27	5262.74	255.813	10258.5	10688	10844	10643.3	17280.3	15849.8	19555.2
YPR114W	YPR114W	Uncharacterized TLC domain-containing protein YPR114W	Q06107	No	No	7							24.9051	24.7952		5.38285		24.2329		24.4118	8.76061	24.7342			25.1754	21.46		25.6706																382.226	354.196			239.861
YPR1	YDR368W	Putative reductase 1	Q12458	No	No	75.6	29.9449	30.4601	30.1341	30.2766	15.0784	30.4543	30.7501	30.7266	30.7223	9.22916	30.303	30.4184	30.3018	30.3783	4.01871	30.688	30.5177	30.4714	30.6542	7.23068	30.9901	30.9056	31.0062	3.70677	0.459395	0.0121526	0.146468	0.242107	0.378879	0.0202976	0.763373	0.00215571	13295.1	19001.7	15157.8	1133.16	18925.8	23231.4	22855.8	22788.9	17041.2	18460.1	17027
YPR098C	YPR098C	Uncharacterized mitochondrial outer membrane protein YPR098C	Q06089	No	No	14.3	26.3708																		26.7642		26.3803	27.2026	26.5525	31.7213					0.393363		0.340918		2188.17
YPR097W	YPR097W	PX domain-containing protein YPR097W	Q06839	No	No	13.3	26.4532		26.1018		17.1361	25.7139			26.3782	31.9952		26.512	26.4616	26.3156	6.95955	26.3627			26.3581	0.223248	25.9368	25.9094	26.0916	6.92568	-0.231495	0.600603	0.152211	0.388826	0.0828697	0.683605	-0.298268	0.140932	333.744		261.605		199.921			316.831		347.624	335.698
YPR091C	YPR091C	Uncharacterized PH domain-containing protein YPR091C	Q06833	No	No	32.5	27.1407	27.1824	27.2776	26.9035	10.6497	26.3032	27.5486	27.2006	26.9407	33.7983	27.2886	26.8881	27.1045	27.097	11.2689	26.932	26.8816	27.0461	27.3665	15.887	27.4645	27.5787	27.553	4.11213	-0.127804	0.658259	-0.031526	0.791638	-0.0694993	0.62474	0.406005	0.00914359	757.607	779.828	833.024	43.5262	423.962	1005.11	789.709	659.508	839.373	635.904	738.816
YPR063C	YPR063C	Uncharacterized protein YPR063C	Q12160	No	No	22.1	28.4295	27.9463	27.9725	28.5746	22.0848	27.8409	27.5436	27.7281	27.664	8.58547	27.5665	27.6001	27.6089	27.5323	2.4115	27.4249	27.7592	27.688	27.6037	9.74952	27.9999	27.8446	27.8944	5.54374	-0.536579	0.0202041	-0.65378	0.00654642	-0.611786	0.0129059	-0.31774	0.159905	10467.8	7488.63	7625.59	783.931	6960.78	5664.75	6437.27	6157.86	5755.09	5890.89	5927.09
YPR010C-A	YPR010C-A	UPF0495 protein YPR010C-A	A5Z2X5	No	No	26.4	25.8341	25.7774			2.77826			25.8269	25.9041	3.78201	26.4551	26.547		26.4002	5.1702	27.0393	26.9142	26.7808	26.887	7.39653	27.0056	27.1016	26.838	9.12674	0.0597559	0.33834	0.661708	0.00153262	1.0996	0.000174958	1.17599	0.00138742	3384.45	3254.04					3367.65	3552.72	5205.05	5547.53
YPQ1	YOL092W	Probable vacuolar amino acid transporter YPQ1	Q12010	No	No	9.7
YPP1	YGR198W	Cargo-transport protein YPP1	P46951	No	No	13.5	29.1633	29.5494		27.47	58.5988	28.6826			27.3456	61.2091	27.3617										28.1881	27.7715	28.8413	38.1215	-0.713449	0.512618	-1.36586				-0.460576	0.55214	2818.57	3683.6		59.0232	2019.88			799.579	808.534
YPL260W	YPL260W	UPF0662 protein YPL260W	Q08977	No	No	54.1	28.5468	28.7517	28.8348	28.8155	8.79801	29.2455	29.0807	29.1642	29.2591	5.65464	29.3055	29.4218	28.8418	29.4026	17.2347	29.4229	29.3531	29.2861	29.5905	9.25917	29.7217	29.5426	29.7557	7.76427	0.450174	0.00116284	0.505755	0.0155332	0.675964	0.00034165	0.936171	0.000189033	2792.64	3218.87	3409.73	227.844	4532.69	4043.35	4284.21	4575.49	4725.26	5122.01	3426.26
YPL247C	YPL247C	WD repeat-containing protein YPL247C	Q12523	No	No	24.1									25.7519									25.3555				25.8737	25.5991	13.4218																440.714
YPL225W	YPL225W	Protein PBDC1 homolog	Q08971	No	No	82.9	29.9771	30.1328	30.0496	29.7338	11.4761	29.7658	30.282	30.1431	30.2661	15.504	30.3238	30.4243	30.499	30.4457	5.02344	30.0307	30.2744	30.405	30.4112	11.8105	29.8985	30.3681	29.981	18.0523	0.140919	0.377126	0.449873	0.00295807	0.30701	0.0477239	0.109216	0.520557	27084.5	30172.8	28481.3	1549.58	23395.5	33458.4	30388	33091.9	34442.5	36928.5	38889.1
YPL199C	YPL199C	Smr domain-containing protein YPL199C	Q08954	No	No	45	28.575	28.972	28.0416	28.2265	29.2769	28.8569	28.5736	28.5613	28.5733	10.4585	28.6108	28.5827	28.8277	28.8663	10.0869	28.2449	28.71	29.2167	28.8804	27.0601	28.7782	28.5849	28.4779	10.6833	0.187495	0.421482	0.268087	0.264164	0.309221	0.324303	0.159869	0.556071	6681.76	8798.51	4616.65	355.403	8123.95	6675.41	6618.6	6673.74	6849.86	6717.52	7960.87
YPL067C	YPL067C	Uncharacterized protein YPL067C	Q02754	No	No	26.3						23.0408		22.7881	22.2965	24.9865	22.9587	22.9404		23.4024	18.9647	23.0981	23.388		23.1529	10.937		22.8857	22.7446	6.9099													169.398		142.178	101.118	160.024	158.002
YPK9	YOR291W	Vacuolar cation-transporting ATPase YPK9	Q12697	No	No	11.1	24.9799	27.1075		26.8323	59.0492	27.2438	27.5568	26.3939	27.3427	30.3013	25.7364	26.6302	26.6824	25.8836	33.0591		25.4468	27.3627		82.1674		27.052			0.827747	0.249406	-0.0734254	0.91181	0.0981776	0.935652	0.745381		88.7244	387.705		21.6969	426.127	529.381	236.425	456.371	149.888	278.499	288.768
YPK3	YBR028C	AGC kinase YPK3	P38070	No	No	8.2			24.8814										25.9189														1.03744								231.886								475.964
YPK2	YMR104C	Serine/threonine-protein kinase YPK2/YKR2	P18961	No	No	15.4	25.2111			24.9305	13.7072	25.7262	25.1242	25.5273	25.4458	16.8207	25.3696		25.5681		9.71569	25.4469		24.7858	24.5968	32.6218		25.4649	25.0513	20.1338	0.385068	0.135782	0.398061	0.146496	-0.12765	0.73862	0.18725	0.531796	226.518			12.6294	323.725	213.286	282.027	266.531	252.826		290.127
YPK1	YKL126W	Serine/threonine-protein kinase YPK1	P12688	No	No	39	28.8763	29.0903	28.943	28.7649	9.50088	29.2312	29.0613	29.2693	29.0994	6.96073	28.928	28.7002	28.5305	28.4652	14.7248	28.8505	28.8278	28.5433	28.7867	9.38086	28.8388	28.8713	28.7358	4.84867	0.246735	0.0267019	-0.262621	0.0779418	-0.166505	0.140875	-0.103326	0.290333	2880.6	3341.15	3016.93	180.584	3684.07	3274.85	3782.75	3362.49	2985.83	2549.6	2266.66
YPI1	YFR003C	Type 1 phosphatases regulator YPI1	P43587	No	No	30.3	25.0918	25.1679	25.6749		23.0821	26.0714	25.9693		25.4241	22.4193	26.2579	26.9733			34.3623	26.4513	26.3179	25.5092	26.7398	32.0287	26.0242	26.0117	26.4993	20.2005	0.510106	0.133776	1.30411	0.0352298	0.94303	0.0420676	0.866866	0.0235615	879.045	926.662	1316.94		1733.51	1615.04		1106.78	1972.73	3239.08
YPD1	YDL235C	Phosphorelay intermediate protein YPD1	Q07688	No	No	38.9	26.2088		26.6773		22.7636	27.0915	27.0447	27.0909	26.7908	9.51908	27.1495	26.8614	26.37	26.4711	25.397	26.8551	27.1164	27.0115	27.5266	20.9858	27.3121	27.8176	27.5574	17.5013	0.561403	0.035343	0.269898	0.427177	0.684305	0.0572408	1.11929	0.0223424	1809.11		2503.24		3335.71	3229.12	3334.31	2708.03	3472.4	2843.79	2022.98
YOS9	YDR057W	Protein OS-9 homolog	Q99220	No	No	14.2	25.606		25.8377		11.3288	26.4356	26.5929			7.70066				26.45		26.5876		26.8054	26.7124	7.5265	26.7856	26.8035	26.8445	2.09978	0.792437	0.0298193	0.728162		0.97996	0.00371939	1.08934	0.00118256	372.757		437.679		662.47	738.77
YOS1	YER074W-A	Protein transport protein YOS1	Q3E834	No	No	18.8																						27.4117
YOR352W	YOR352W	Uncharacterized protein YOR352W	Q08816	No	No	24.8									24.9607													25.7503																		371.721
YOR304C-A	YOR304C-A	Uncharacterized protein YOR304C-A	O14468	No	No	14.5													24.4712																														1206.69
YOR296W	YOR296W	Uncharacterized protein YOR296W	Q08748	No	No	4.4
YOR289W	YOR289W	Uncharacterized protein YOR289W	Q12012	No	No	51.8											26.8952	26.9354	27.0572		5.92091	26.9115	26.6374	26.8563	26.7617	8.19955	26.3707	26.6375	26.6399	10.3761																	1917.65	1971.89	2145.66
YOR283W	YOR283W	Broad-specificity phosphatase YOR283W	Q12040	No	No	82.2	27.9327	27.7625	28.191	28.1733	13.9116	27.9426	27.9776	28.1421	28.1758	8.0619	28.4652	28.3979	28.5862	28.2538	9.54841	28.8877	28.697	28.4109	28.7682	13.4797	28.7889	28.5541	28.9207	12.6221	0.0446447	0.718363	0.410872	0.0160802	0.676054	0.00337246	0.739664	0.00448558	4375.97	3889.01	5234.09	350.14	4406.21	4514.32	5059.53	5179.09	6329.45	6040.96	6883.19
YOR262W	YOR262W	GPN-loop GTPase 2 homolog	Q08726	No	No	28.2	26.3461	26.3738	26.9182		23.5796		26.8592		26.3744	23.5411						26.421		26.5362	26.4468	4.23135	26.9248	26.87	26.717	7.34385	0.0707927	0.829077			-0.0780133	0.701686	0.291223	0.212204	960.097	978.679	1427.36			1370.18		979.118
YOR238W	YOR238W	Uncharacterized protein YOR238W	Q08634	No	No	15.8																							25.4608
YOR020W-A	YOR020W-A	Uncharacterized protein YOR020W-A	Q3E824	No	No	50			25.5759			26.892	27.456			27.2946	27.4659	27.3919	27.4315	27.2668	5.90422	27.2042	27.3629	27.6608	26.83	23.4697	26.7676	26.2781	26.3133	19.8131	1.5981		1.81311		1.68857		0.877092				2325.14		5789.5	8558.73			8617.77	8186.84	8414.62
YOP1	YPR028W	Protein YOP1	Q12402	No	No	49.4	30.0882	29.5641	29.8976	29.3089	23.5501	30.2438	30.2493	30.1475	29.932	9.88453	30.395	30.7591	30.361	30.4335	13.4593	30.6354	30.4537	30.4902	30.3547	8.15291	31.081	30.4282	30.5385	25.4658	0.428433	0.0633952	0.772431	0.0076356	0.768773	0.00564734	0.967879	0.0148304	25177	17508.6	22062.4	993.483	28044.6	28152.7	26233.6	22594	31143.7	40083.8	30418
YOL107W	YOL107W	Uncharacterized membrane protein YOL107W	Q12239	No	No	8.5																24.6074						24.4083
YOL019W	YOL019W	Uncharacterized membrane protein YOL019W	Q08157	No	No	10	24.6305							25.0897																	0.45929								190.672						262.148
YNR034W-A	YNR034W-A	Uncharacterized protein YNR034W-A	Q3E841	No	No	76.5
YNK1	YKL067W	Nucleoside diphosphate kinase	P36010	No	No	79.7	30.7474	30.9342	29.9894	30.5715	25.7291	30.8994	31.2402	31.2543	31.0523	11.4516	30.9719	30.84	30.9242	30.9047	3.76979	31.0058	31.1017	30.965	31.0052	4.0785	30.8954	31.2933	31.0669	13.9293	0.550934	0.046999	0.349562	0.140805	0.4588	0.0678681	0.524574	0.0999031	46946.7	53437.2	27761.7	2814.58	52163.6	66064	66715.1	57997.7	54851.4	50061.7	53067.3
YMR31	YFR049W	37S ribosomal protein YMR-31, mitochondrial	P19955	No	No	90.2	26.9191	27.8538	27.2896	27.3758	27.2716	27.934	27.1984	27.5704	27.4067	22.2354	27.9773	27.9912	28.0751	27.5436	15.335	28.1472	27.2416	28.0696	28.0284	25.1261	27.5269	27.8829	28.1246	20.3249	0.167802	0.522606	0.537208	0.0553433	0.512143	0.123287	0.485245	0.132061	4144.66	7922.21	5358.33	385.198	8375.54	5029.77	6509.63	5811.01	8630.3	8714.23	9235.5
YMR306C-A	YMR306C-A		A0A023PXI0	No	No	15.5													25.7683																														1783.48
YMR295C	YMR295C	Uncharacterized protein YMR295C	Q03559	No	No	48.7	28.5345	29.0178	28.4745	29.0766	21.6018	29.247	28.9559	29.0206	28.9532	10.0058	29.0923	29.3016	29.3785	29.3858	9.12676	28.9139	28.9431	29.0437	28.8791	4.98073	28.747	28.4247	28.541	11.465	0.268295	0.170245	0.513704	0.0243341	0.169102	0.335519	-0.204979	0.357823	7838.16	10957.6	7518.83	772.945	12843.7	10497.2	10978.4	10477.4	11538.4	13339.4	14069.6
YML6	YML025C	54S ribosomal protein YmL6, mitochondrial	P51998	No	No	32.9	26.2991	25.8281	27.2196	26.2549	44.7826	25.5691	26.0205	26.0817	26.4035	22.9955	25.3663	25.5324		25.9008	19.4806	26.0596	26.0279	26.4186	26.1542	12.839	25.9577	26.0002	25.9762	1.47826	-0.381724	0.30398	-0.800578	0.0833976	-0.235335	0.471169	-0.422406	0.277561	1154.79	833.087	2185.61	75.845	696.213	951.989	993.189	1241.4	604.917	678.717
YML082W	YML082W	Putative cystathionine gamma-synthase YML082W	Q04533	No	No	14.6
YML079W	YML079W	Uncharacterized protein YML079W	Q03629	No	No	35.3	26.7462	27.0349	27.0771		12.0316				27.0436										27.2061		27.2763	27.3087	27.7385	18.6833	0.0908939				0.253361		0.488409	0.0547288	2240.74	2736.99	2818.4					2753.71
YME2	YMR302C	Mitochondrial escape protein 2	P32843	No	No	32.7	26.8108	27.7847	27.7626	27.6516	27.1815	27.3066	28.1123	28.2882	28.1039	26.2774	28.6679	28.1643	27.1767	28.1954	37.9447	28.3655	28.5799	28.4751	28.4464	6.17429	28.7188	28.974	28.9519	9.51872	0.450349	0.208565	0.548695	0.209239	0.964274	0.00652958	1.37917	0.00460075	544.353	1069.19	1052.96	66.0263	767.607	1341.74	1515.79	1334.02	1972.15	1391.03	701.528
YMC2	YBR104W	Carrier protein YMC2, mitochondrial	P38087	No	No	14.6	24.2486																				24.5397										0.291144		243.783
YMC1	YPR058W	Carrier protein YMC1, mitochondrial	P32331	No	No	38.1	27.1578	27.7032	27.2184	27.4859	17.8088	28.1727	27.6865	27.8216	27.3001	24.7036	27.5077	27.4984	27.5568	27.367	5.51338	27.9466	27.7723	28.0093	28.0406	8.05663	27.9858	28.1969	28.2374	9.12611	0.353907	0.158821	0.091195	0.516735	0.550943	0.00755689	0.748727	0.00584496	2005.79	2927.31	2091.8	170.52	4053.25	2893.55	3177.68	2213.7	2556.37	2539.9	2644.92
YLR455W	YLR455W	PWWP domain-containing protein YLR455W	Q06188	No	No	13.2			27.1484	26.9847	8.01635	27.1583	26.9791	26.5275	27.0418	17.6864	26.9458	26.9999			2.65152	26.5502	26.7713	26.636	26.5612	7.21166		26.2679			-0.139879	0.547551	-0.0936811	0.390753	-0.436869	0.00875823	-0.798658				1873.09	113.241	1885.93	1665.71	1218	1739.62	1627.69	1689.89
YLR437C-A	YLR437C-A	Putative uncharacterized protein YLR437C-A	Q8TGR0	No	No	10.7
YLR422W	YLR422W	DOCK-like protein YLR422W	Q06409	No	No	3.2	25.0091		25.1534		7.07047			23.6682			25.4406	26.1609			34.5897		26.1822	26.0273	25.5201	22.5338	25.3022	25.456	25.1749	9.79126	-1.41308		0.719506	0.189233	0.828622	0.0515641	0.229772	0.146492	68.1376		75.3094				26.8991		91.8948	151.402
YLR419W	YLR419W	Putative ATP-dependent RNA helicase YLR419W	Q06698	No	No	11.8	25.7673			26.8954	52.6353																												156.617			23.1823
YLR413W	YLR413W	Cell membrane protein YLR413W	Q06689	No	No	6.1	27.2536	27.2572	27.7818	27.1163	22.0231	26.7336	26.7052	26.6313	26.5831	4.74586															-0.688927	0.00382239							984.078	986.538	1419.14	60.5967	686.29	672.883	639.303	618.27
YLR361C-A	YLR361C-A	Uncharacterized protein YLR361C-A	Q3E795	No	No	66.3	27.7615	27.9762	27.5464	27.5001	15.5282	27.9628	27.7813	27.6453	27.5933	11.699	27.9763	27.7031	27.8444	27.8289	7.75723	27.5144	27.48	27.7443	27.5057	8.86773	27.1049	27.1679	27.1785	2.73586	0.0495766	0.729873	0.142114	0.291229	-0.134944	0.323521	-0.545663	0.00873322	9206.09	10683.7	7931.16	520.157	10584.6	9333.14	8493.57	8192.95	10684.5	8840.73	9750.7
YLR352W	YLR352W	F-box protein YLR352W	Q06479	No	No	9.8	26.8546															26.8691			26.0007	41.3242	26.2908	27.0292		35.4199					-0.419669		-0.194605		582.621
YLR345W	YLR345W	Putative 6-phosphofructo-2-kinase/fructose-2,6-bisphosphatase YLR345W;6-phosphofructo-2-kinase;Fructose-2,6-bisphosphatase	Q06137	No	No	19.8			25.2577														25.5115				25.7285	25.8792	25.4795	13.7247					0.253787		0.437997				307.211
YLR326W	YLR326W	Uncharacterized membrane protein YLR326W	Q06170	No	No	13.3																						26.0147
YLR290C	YLR290C	Uncharacterized protein YLR290C, mitochondrial	Q05892	No	No	40.4	25.8634	25.5589	25.7483		10.5093				25.5542					26.3625		25.7787		25.6046		8.52667	25.6573	26.0083		17.1213	-0.169344		0.638939		-0.0319008	0.824242	0.109227	0.574556	865.823	701.063	799.405					698.779
YLR287C	YLR287C	Uncharacterized protein YLR287C	Q05881	No	No	28.7			26.1743																				25.4474								-0.726903				827.234
YLR257W	YLR257W	Uncharacterized protein YLR257W	Q06146	No	No	66.7	28.5618	27.971	28.4797	28.6039	18.4121	28.3815	28.3404	27.8319	27.9288	19.2155	28.4713	27.8873	28.4199	28.3324	16.9639	28.0972	27.9839	27.738	27.6368	14.7407	27.6863	27.222	27.5654	16.0546	-0.28346	0.212116	-0.126355	0.54724	-0.540142	0.024652	-0.912863	0.00722778	4921.41	3267.57	4649.17	343.14	4343.01	4221.17	2967.25	3173.43	4621.97	3083.51	4460.38
YLR225C	YLR225C	Uncharacterized SVF1-like protein YLR225C	Q05948	No	No	26.5	27.6172		27.7816	27.799	6.81616	28.7775	28.1257	28.2109	28.2782	21.9994	28.2024	28.4157	28.9974	28.4502	25.2293	27.8915	28.514	28.6433	27.9636	26.0963	28.4035	28.1946	27.7394	22.4338	0.615453	0.0188591	0.783822	0.0126204	0.520467	0.0734614	0.379916	0.136655	1982.75		2222.18	152.318	4431.74	2820.65	2992.18	3135.11	2974.75	3448.7	5161.2
YLR177W	YLR177W	Uncharacterized protein YLR177W	Q06251	No	No	13.1						25.218	25.2237			0.280279								24.3366	24.6998	17.708																	244.843	245.815
YLR149C	YLR149C	Uncharacterized protein YLR149C	Q99296	No	No	11.2	27.3721																																938.002
YLR146W-A	YLR146W-A	Coiled-coil domain-containing protein YLR146W-A	Q2V2P1	No	No	22.6																			24.3066
YLR072W	YLR072W	Uncharacterized protein YLR072W	Q08001	No	No	6.6	23.8016		23.7485	23.4778	11.6384				23.6677										24.381		24.3392	25.2582	24.416	37.9659	-0.0082251				0.705032		0.99517	0.032904	83.5868		80.5628	4.52253				76.1782
YLL032C	YLL032C	KH domain-containing protein YLL032C	Q07834	No	No	4.2	24.6466	24.677		24.4232	9.33891			24.7009						25.3056								24.6869	24.3659	15.6663	0.118604		0.72334				-0.0558533	0.747139	124.133	126.775		7.20085			128.892
YLH47	YPR125W	LETM1 domain-containing protein YLH47, mitochondrial	Q06493	No	No	12.8	25.605	26.7416	26.7715	25.9668	37.6966	26.1308	26.0849	26.408	25.8908	15.0796		24.7114						25.861	25.4385	20.5626	25.8564	26.2302	26.1145	12.9284	-0.142618	0.660502	-1.55985		-0.621513	0.242493	-0.204231	0.590191	437.351	961.56	981.698	38.06	629.663	609.953	763.026	533.147		235.407
YLF2	YHL014C	Obg-like ATPase homolog	P38746	No	No	6.9																						22.3813
YKU80	YMR106C	ATP-dependent DNA helicase II subunit 2	Q04437	No	No	5.9																						26.5466
YKT6	YKL196C	Synaptobrevin homolog YKT6	P36015	No	No	80	29.9607	30.2538	29.8776	29.9507	12.0711	29.7421	30.2652	29.9946	30.0523	14.75	29.8569	29.8369	30.3436	29.9496	17.5155	29.9798	29.917	29.9562	29.9625	1.82941	29.9525	30.0518	30.2824	11.9547	0.00281077	0.984174	-0.0139903	0.926025	-0.056876	0.52441	0.08485	0.536388	20573.8	25208.7	19422.5	1383.71	17681.2	25407.6	21062.1	21922.5	19144.9	18881.2	26827.2
YKR070W	YKR070W	Uncharacterized protein YKR070W	P36151	No	No	38.1	27.3343	27.5035	27.3461	27.7247	13.0429	27.398	27.5007	27.5796	27.3663	6.81144	26.9056	27.096	26.7111	27.3055	17.6612	26.7281	27.444	27.3594	27.5984	23.6574	27.5374	27.2344	27.5844	12.667	-0.0160234	0.881863	-0.472642	0.0234688	-0.194728	0.393529	-0.0250981	0.866221	1919.94	2158.89	1935.71	170.432	2006.62	2154.69	2275.75	1962.94	1426.4	1627.56	1246.45
YKR018C	YKR018C	Mitochondrial outer membrane protein YKR018C	P36114	No	No	37.1	28.4417	28.1922	28.6332	28.3696	12.6802	29.0085	28.922	28.8159	29.0151	6.35278	28.9086	28.953	29.1186	29.0529	6.61216	29.1676	29.008	29.0574	29.0517	4.78637	29.2027	29.0136	29.0691	6.81944	0.531198	0.0020438	0.599128	0.00112793	0.662029	0.000495503	0.685973	0.00210362	1993.88	1677.18	2276.84	128.45	2953.34	2781.51	2584.3	2966.9	2755.8	2842.05	3187.62
YKL091C	YKL091C	CRAL-TRIO domain-containing protein YKL091C	P33324	No	No	19.4							25.7732		25.5656	10.1551			25.2942	25.3458	2.52668	25.3889	25.1969	24.9082	25.375	14.7476		26.0672																710.755		615.518			509.969
YKL077W	YKL077W	Uncharacterized protein YKL077W	P36081	No	No	20.4	27.5163	27.8415	27.8457	27.5212	12.9453	27.8489	28.086	28.0088	27.9043	7.36547	27.8289	27.6717	27.9994	28.0448	11.5827	27.9717	27.8333	28.0853	27.8556	8.17266	27.8377	28.1745	28.0465	11.6036	0.280862	0.0402409	0.205058	0.156839	0.255339	0.0599396	0.338412	0.0578319	1864.38	2335.7	2342.49	126.688	2347.84	2767.1	2622.97	2439.71	2315.5	2076.39	2605.88
YKL075C	YKL075C	Uncharacterized protein YKL075C	P36083	No	No	6																					25.8576	25.0554		38.3332
YKL071W	YKL071W	Uncharacterized oxidoreductase YKL071W	P36086	No	No	10.5			24.5992	24.1653	21.1093	24.7292	25.1297	24.7065	24.8951	14.0061	25.9534	25.7518	26.0625	26.1907	12.6503	25.3595	25.9678	25.5568	25.5504	18.6782					0.482825	0.0711456	1.60733	0.00112582	1.22636	0.00630691					405.269	20.3166	443.458	585.357	436.538	497.513	1036.09	900.965	1117.42
YKL033W-A	YKL033W-A	Putative uncharacterized hydrolase YKL033W-A	Q86ZR7	No	No	64	29.2118	28.7142	28.8436	28.721	17.2384	28.5795	28.3693	28.4934	28.5413	6.21772	28.4388	28.6464	28.8494	28.7766	12.1251	27.9593	28.4878	28.6238	28.4059	18.4984	28.266	28.4449	28.5187	8.84467	-0.376745	0.0239688	-0.194879	0.234769	-0.503432	0.0348231	-0.462751	0.0285414	10622.6	7523.55	8229.64	511.92	6852.99	5923.95	6456.13	6674.12	6216.09	7178.11	8262.61
YKL023W	YKL023W	Uncharacterized protein YKL023W	P36103	No	No	26																					25.3218	25.8958	25.807	20.0831
YKL023C-A	YKL023C-A	Uncharacterized protein YKL023C-A	Q2V2P3	No	No	14.7
YKE2	YLR200W	Prefoldin subunit 6	P52553	No	No	77.2	29.6643	29.28	29.4134	29.0983	16.7411	29.0445	29.2646	29.1792	29.1774	6.22391	29.4515	29.2699	29.5894	29.3682	9.45356	29.2355	29.419	29.3318	29.6185	11.5559	29.3229	29.3878	29.2226	5.7304	-0.197582	0.172205	0.055763	0.698092	0.0371807	0.805358	-0.0529314	0.732759	28636.4	21939.4	24065.5	1309.96	18635.3	21706.8	20458.5	20433.6	24709.7	21786.2	27187.4
YJU3	YKL094W	Monoglyceride lipase	P28321	No	No	59.4	28.4058	28.7115	27.8178	28.3519	24.2378	29.0351	28.7301	28.9609	28.6918	11.7351	29.0263	28.9451	28.9248	28.8095	6.14359	28.9119	28.9724	28.8789	28.8781	3.101	28.7401	28.8783	28.679	7.16072	0.532763	0.0400854	0.60471	0.0194222	0.588605	0.0198849	0.444062	0.105674	4471.07	5526.13	2974.34	291.681	6916.12	5597.92	6569.12	5451.45	6873.75	6497.46	6407.06
YJU2	YKL095W	Protein CWC16	P28320	No	No	19.4		27.421	27.7808	26.8687	30.4348	27.2122	27.0975	27.6071	27.4032	15.7218	27.6333	27.2246	27.8008	27.216	20.5402	27.5284	27.6419	27.7016	27.4145	8.70591			26.3194		-0.0268178	0.921366	0.111857	0.708235	0.214772	0.401365	-1.03738			2486.47	3190.62	114.828	2151.48	1986.96	2828.79	2455.89	2880.54	2170.02	3235.18
YJL133C-A	YJL133C-A	Uncharacterized protein YJL133C-A	Q3E7A3	No	No	52.7																						25.9961
YIR035C	YIR035C	Uncharacterized oxidoreductase YIR035C	P40579	No	No	33.9	27.5012	27.5544	26.6328	27.7646	29.5459	27.261	27.0182	27.1418	27.4092	11.6248	26.3361	26.7699	26.6414		14.9584	26.8875	26.9367		26.7852	5.31	28.074	27.6777	27.47	21.7942	-0.155712	0.576287	-0.780805	0.0558256	-0.493445	0.158864	0.377321	0.305822	3090.77	3206.78	1693.03	251.251	2616.67	2211.39	2409.23	2899.93	1378.25	1861.75	1703.12
YIP5	YGL161C	Protein YIP5	P53108	No	No	19.7		25.9425	25.3284		29.6494		25.4087		25.6459	11.6								25.6328			26.0189	26.2473		11.1712	-0.108199	0.773581			-0.00262461		0.497597	0.268086		827.463	540.637			571.548		673.689
YIP4	YGL198W	Protein YIP4	P53093	No	No	8.9	26.7933		24.9493	25.4662	69.1488	24.8779		24.9216	25.2601	15.0247							25.3788		25.0063	18.1548		26.4579			-0.716389	0.271645			-0.543725	0.506352	0.721612		2000.27		557.169	53.992	530.269		546.574	691.134
YIP3	YNL044W	Prenylated Rab acceptor 1	P53633	No	No	39.2	29.7858	29.2597	29.5072	28.8922	25.6323	29.2173	29.4799	29.401	29.3407	7.59253	29.4865	29.1446	29.2948	29.2495	10.1149	29.1584	29.4178	29.2178	29.2362	7.96869	28.5041	29.1226	28.9296	20.9728	-0.00146784	0.994314	-0.0673606	0.750987	-0.103654	0.618994	-0.509116	0.119674	21318.7	14804.2	17575.6	777.151	14376.3	17245.7	16328.1	15660.2	17324.7	13669.6	15169.5
YIP1	YGR172C	Protein transport protein YIP1	P53039	No	No	11.7													26.0988						25.5608																								1186.55
YIM1	YMR152W	Protein YIM1	P28625	No	No	33.7	27.4104	27.2008	26.808	27.3522	17.5103	27.7237	27.9883	28.0036	27.9572	8.69472	28.07	27.7872	27.9201	27.5795	14.2158	27.2413	27.5022	27.4385	27.5107	8.38313	27.5939	27.6849	27.6856	3.61591	0.725352	0.0029588	0.646379	0.0091788	0.230337	0.174279	0.461975	0.0361586	1915.43	1656.43	1261.6	124.591	2380.06	2859.07	2889.68	2798.08	3025.73	2487.11	2727.21
YIL156W-B	YIL156W-B	Uncharacterized protein YIL156W-B	Q2V2P4	No	No	28.8		26.682							27.0832												26.9389	27.8836	27.1763	35.8611	0.401204						0.650876			5896.16						7786.52
YIL077C	YIL077C	Uncharacterized protein YIL077C	P40508	No	No	30.3	24.8434					25.6281			25.0827	26.4188	25.4201	25.7934	25.7117	25.6341	10.7681	25.6986	25.694		25.5153	7.08889	25.7708	25.788	25.8943	4.69224	0.512052		0.796484		0.792595		0.974371		364.273				627.573			430.007	543.323	703.726	665.026
YIL002W-A	YIL002W-A	Uncharacterized protein YIL002W-A	Q3E7Z5	No	No	49.3	26.4931		26.3176		8.59246																												5463.98		4838.05
YIH1	YCR059C	Protein IMPACT homolog	P25637	No	No	16.3	24.8127	24.3707	25.0667	23.7144	37.2146	24.1883	24.4731	24.0678	24.0591	14.0411	24.068	24.0949	24.7419		28.0904						26.5763	25.3884		55.1423	-0.294015	0.381702	-0.189521	0.652365			1.49122	0.0602188	454.058	334.23	541.468	14.3623	294.539	358.837	270.95	269.316	270.981	276.081	432.302
YIF1	YNL263C	Protein transport protein YIF1	P53845	No	No	27.7	27.6893	27.6373	27.7289	27.721	2.85621	27.9676	28.2321	27.8462	27.7217	15.552	27.947	28.2859	28.2186	28.123	9.95539	27.9289	27.9518	28.1706	27.9258	8.50872	27.9593	28.3321	27.9743	15.1876	0.247797	0.0669647	0.449507	0.00107209	0.30018	0.00301866	0.394456	0.0131434	2725.79	2629.44	2801.74	188.7	3305.91	3971.17	3039.03	2787.76	3258.93	4121.81	3934.15
YHR193C-A	YHR193C-A		A0A023PYH5	No	No	7.3
YHR162W	YHR162W	Mitochondrial pyruvate carrier 2	P38857	No	No	7
YHR127W	YHR127W	Uncharacterized protein YHR127W	P38833	No	No	35	25.8487	26.1785	26.0461	25.6811	15.0124	25.9709	26.0926	26.205	25.8791	9.88014	26.302	26.4072	26.1604	26.043	11.0145	25.9406	26.3027	25.8691	26.2447	14.8978	26.1214	26.2647	26.1542	5.26181	0.0982819	0.479594	0.289532	0.0762371	0.150685	0.365004	0.241498	0.132209	995.745	1251.49	1141.76	60.04	1083.74	1179.13	1274.69	1016.97	1363.31	1466.44	1235.89
YHR112C	YHR112C	Uncharacterized trans-sulfuration enzyme YHR112C	P38716	No	No	62.4	24.5943			25.299	33.8671		25.86	25.7417		5.79521	26.6253		26.911	26.455	16.2265	27.0925	26.691	26.7827	27.3031	19.7842	27.1585	27.0182	27.0927	4.85609	0.854205	0.13929	1.71709	0.0119989	2.02066	0.00260252	2.14309	0.00407161	266.813			29.4487		641.532	591.024		1090.43		1329.22
YHR097C	YHR097C	Uncharacterized protein YHR097C	P38809	No	No	21		25.9063		24.8352	50.214	26.4113	26.1462	26.3087	25.9153	14.5674	25.8227	25.5192	25.8111	25.5288	11.6891		24.9385	24.5722	25.9349	51.6296		23.9152			0.824625	0.0872798	0.299689	0.442123	-0.222231	0.758518	-1.45551			691.499		22.2884	981.326	816.572	913.925	695.831	652.565	528.768	647.309
YHR045W	YHR045W	Putative uncharacterized protein YHR045W	P38775	No	No	14.5				25.4784																																22.5782
YHM2	YMR241W	Mitochondrial DNA replication protein YHM2	Q04013	No	No	44.9	29.5872	29.504	29.7531	29.7097	7.83849	29.2818	29.5031	29.6355	29.4367	10.1307	29.4473	29.3505	29.4827	29.3998	3.97217	29.4451	29.5805	29.5277	29.6108	4.9773	29.5384	29.7973	29.5626	10.1682	-0.174196	0.110217	-0.218415	0.0140805	-0.0974487	0.199165	-0.00571879	0.955038	10548.6	9957.86	11834.3	777.738	8536.69	9951.58	10908.2	9504.28	9574.25	8952.74	9811.64
YHI9	YHR029C	Uncharacterized isomerase YHI9	P38765	No	No	53.7	28.2083	28.2992	28.3278	28.1439	5.81472	27.6235	28.0402	27.9247	27.8612	11.815	28.1611	27.8704	27.8723	27.914	10.0798	28.258	28.4008	28.4937	28.7798	15.7534	28.5215	28.7051	28.3262	13.0806	-0.382412	0.00776773	-0.290366	0.011832	0.238257	0.0898764	0.272765	0.0473321	4258.12	4535.2	4625.95	275.781	2838.98	3789.93	3498.16	3347.68	4121.1	3368.96	3373.35
YHB1	YGR234W	Flavohemoprotein	P39676	No	No	70.4	31.0943	31.1038	31.374	30.9646	12.326	29.6084	30.0897	29.976	29.945	13.6005	29.7482	29.6678	29.5617	29.6088	5.61032	29.6396	29.7353	29.6531	29.8085	5.49407	29.8884	30.2336	29.9379	13.3472	-1.22942	9.70333e-05	-1.48756	4.28719e-06	-1.42503	5.38701e-06	-1.1142	0.000440646	22957.6	23109.8	27870.5	1421.07	8196.42	11442.2	10575	10350.7	9030.31	8541.11	7935.65
YGR266W	YGR266W	Uncharacterized protein YGR266W	P53326	No	No	35.8	28.0842	26.985	27.1753	27.2162	38.4198	27.8697	28.3201	28.4611	28.4308	17.4002	28.3921	28.3264	28.3435	28.0725	9.50295	28.2929	28.4153	28.3555	28.63	10.4886	27.9207	28.8859	28.7499	32.1517	0.905229	0.0180025	0.918463	0.0113808	1.05824	0.0060804	1.15363	0.0300273	1567.06	731.463	834.605	58.1475	1350.53	1845.43	2034.86	1992.62	1939.92	1853.52	1875.66
YGR250C	YGR250C	Uncharacterized RNA-binding protein YGR250C	P53316	No	No	10.2	24.4266					25.0311	24.7867	24.3365		23.4136			25.2133			25.0545	25.2349	25.1865	25.1481	5.23977	25.7977				0.291459		0.786717		0.729388		1.37109		112.633				171.252	144.559	105.81				194.307
YGR169C-A	YGR169C-A	Uncharacterized protein YGR169C-A	Q3E772	No	No	73.9	27.9241	28.3174	28.4182	28.058	15.6573	27.5178	27.6072	27.5428	27.5183	2.94996	27.6275	27.74	28.0147	27.9063	11.891	27.9858	27.9709	27.8189	27.8997	5.2426	28.0392	27.7909	28.0819	10.5604	-0.632887	0.00157347	-0.35729	0.0464139	-0.26059	0.0733559	-0.208775	0.235264	10849.5	14249.5	15280.4	806.22	8186.57	8709.71	8329.71	8189.55	8833.25	9549.79	11552.4
YGR130C	YGR130C	Uncharacterized protein YGR130C	P53278	No	No	47.8	29.902	30.2409	30.1962	29.7899	15.1174	30.8076	30.7237	30.8	30.7265	3.15858	31.0245	30.9792	31.0541	31.0036	2.20707	30.8789	30.8849	30.8437	30.8345	1.74074	30.6838	30.6202	30.5777	3.71416	0.732183	0.000632334	0.983097	0.000118135	0.828227	0.000299857	0.59494	0.00657895	4838.61	6120.13	5933.47	303.201	9064.68	8552.46	9016.93	8568.86	10535.3	10209.2	10753.8
YGR054W	YGR054W	Eukaryotic translation initiation factor 2A	P53235	No	No	60.7	30.4497	30.2373	30.3334	30.1522	8.9207	30.0119	29.9293	29.9372	30.0214	3.35462	29.9802	29.9408	30.1066	29.9468	5.47956	29.7886	29.8111	29.9913	29.8478	6.46901	29.7202	29.5914	29.6346	4.57475	-0.31821	0.00349799	-0.299531	0.00706189	-0.433453	0.00148788	-0.644387	0.000537883	9195.32	7936.26	8483.02	506.677	6788.17	6410.7	6445.82	6833.32	6640.82	6462.12	7249.04
YGR026W	YGR026W	Uncharacterized membrane protein YGR026W	P53217	No	No	4.3
YGR017W	YGR017W	Uncharacterized protein YGR017W	P53210	No	No	23.9	25.8676	26.2458	26.2033	25.7835	16.0394		26.1909		25.9651	11.0436							26.4315	26.1616		13.1926	26.2737	25.8138		22.3481	0.0529003	0.792706			0.271466	0.233666	0.0186834	0.937737	789.334	1025.9	996.154	50.4287		987.567		844.501
YGR012W	YGR012W	Putative cysteine synthase	P53206	No	No	57.3	28.4897	28.6821	28.3825	28.3999	9.82249	28.7861	29.1791	28.8187	28.9056	12.9423	28.9196	28.6264	28.9372	28.9644	10.3716	28.6836	28.9605	28.9383	28.8173	8.66509	28.7832	28.905	28.833	4.26005	0.433828	0.00842355	0.373353	0.0118361	0.361377	0.00839036	0.351886	0.00963647	3937.46	4499.14	3655.41	250.553	4835.3	6349.36	4946.03	5253.15	5304.23	4328.87	5369.2
YGP1	YNL160W	Protein YGP1	P38616	No	No	14.7	27.2424		27.3337		4.47656	28.0975	28.4235		28.4107	12.2959	28.2877	27.9916	27.7236	27.7512	18.8812	28.1502	27.9892	28.0863	27.8919	7.78116	28.7031	28.9595	28.9743	10.2339	1.0225	0.00549455	0.65048	0.0305929	0.741351	0.00114985	1.59091	0.000897139	1901.71		2026.04		3440.01	4312.11		4274.15	3924.75	3196.63	2654.75
YGL258W-A	YGL258W-A	Uncharacterized protein YGL258W-A	Q3E740	No	No	14.3														28.073
YGL140C	YGL140C	Uncharacterized membrane protein YGL140C	P53120	No	No	14.2																					26.4336		26.2174	10.5768
YGL117W	YGL117W	Uncharacterized protein YGL117W	P53133	No	No	40.8	26.0916		25.3918		33.6434																	25.4987	25.6512	7.4691							-0.166744	0.687285	1039.52		639.975
YGL082W	YGL082W	Uncharacterized protein YGL082W	P53155	No	No	36.2	26.229	26.9865	26.6147	26.7637	21.186	27.0876	26.933	26.7344	26.6534	13.7211	26.7149	27.1087	27.2865	26.5438	23.5698	26.7257	26.9088	26.8259	26.9403	6.5666	27.3368	27.4391	27.2471	6.67135	0.203608	0.318216	0.264987	0.300959	0.201711	0.271	0.692509	0.0160967	811.758	1372.32	1060.53	79.6361	1471.91	1322.36	1152.28	1089.33	1136.8	1493.58	1689.46
YGL039W	YGL039W	Putative uncharacterized oxidoreductase YGL039W	P53183	No	No	56.9	28.5176	28.7368	28.7021	28.5671	7.27	28.4689	28.502	28.7258	28.5622	8.11964	28.675	28.7931	28.553	28.7284	6.96005	28.9144	28.9594	29.1172	28.941	6.50683	29.5366	29.9197	29.8157	13.3177	-0.0661933	0.42638	0.0564595	0.469702	0.352094	0.00232357	1.12642	0.000182221	4490.81	5227.72	5103.27	314.741	4341.69	4442.31	5187.88	4631.74	5008.38	5435.62	4602.17
YFR056C	YFR056C	Putative uncharacterized protein YFR056C	P43624	No	No	10.7			22.272																																161.72
YFR039C	YFR039C	Uncharacterized protein YFR039C	P43611	No	No	15.5
YFR016C	YFR016C	Uncharacterized protein YFR016C	P43597	No	No	29.4	27.3773	28.646	27.8374	28.3249	36.8695	28.8679	28.031	28.9926	28.4203	28.7956	28.5067	28.3816		28.3151	6.80452	28.5115	27.9638	28.3764	28.258	15.5626	28.5673	28.475	28.75	9.83304	0.531537	0.184474	0.354735	0.334741	0.230982	0.472838	0.551028	0.161918	566.059	1363.85	778.697	73.9346	1590.67	890.519	1734.19	1166.34	1238.36	1135.46
YFR006W	YFR006W	Uncharacterized peptidase YFR006W	P43590	No	No	40.7	26.7977	26.4133	26.7106	26.2917	16.4621	28.5138	28.0027	27.9831	27.4885	29.0609	27.6636	28.1401	28.153	28.2157	16.1752	28.0884	28.2243	27.9881	28.143	6.83659	27.6081	27.5353	27.8466	11.5519	1.44371	0.000978195	1.4898	0.000144233	1.55763	2.02589e-05	1.11002	0.00101801	844.623	647.028	795.101	40.2763	2774.96	1947.06	1920.85	1363.3	1539.3	2141.68	2160.86
YFL042C	YFL042C	Uncharacterized protein YFL042C	P43560	No	No	18.1	25.1033		26.5057		63.789			26.7923	26.7872	0.249893	26.9925	26.5446	26.712		15.9297		27.252	26.7959	27.3357	18.9639	26.2012	27.1716	25.9848	46.9767	0.985251	0.29518	0.945228	0.183701	1.32336	0.10129	0.648039	0.424977	211.085		557.974				680.602	678.201	781.914	573.253	643.767
YFL034W	YFL034W	Uncharacterized membrane protein YFL034W	P43564	No	No	6.2																					25.0616
YFH7	YFR007W	ATP-dependent kinase YFH7	P43591	No	No	22.9	24.5255																																270.7
YET3	YDL072C	Endoplasmic reticulum transmembrane protein 3	Q07451	No	No	29.1	27.0298	27.6062	26.628	27.1904	28.0261	28.1969	27.8876	27.8222	28.1442	12.7921	28.3823	28.1675	28.1562	28.3119	7.72269	28.2208	28.3476	28.3611	28.2177	5.41939	28.2149	28.1309	28.6043	18.1892	0.899127	0.00680728	1.1409	0.00160567	1.17323	0.00126885	1.2031	0.00653637	2674.91	3988.55	2024.63	202.477	6006.74	4847.52	4632.78	5791.22	6830.57	5885.51	5839.83
YET1	YKL065C	Endoplasmic reticulum transmembrane protein 1	P35723	No	No	44.7	28.4291	28.4503	28.7756	28.607	11.4019	29.1683	29.006	28.9901	28.9631	6.60298	29.1375	29.0509	29.4959	29.3059	13.8555	29.2742	29.4754	29.3873	29.2689	6.93765	29.5205	29.3098	29.0967	14.6441	0.466338	0.00240093	0.682024	0.00171233	0.785902	0.000164134	0.743471	0.00314735	6888.32	6990.1	8758.35	527.712	11497.8	10274.6	10162	9973.52	11255.2	10599.6	14428.8
YER156C	YER156C	UPF0160 protein YER156C	P40093	No	No	27.8	25.9313		26.5859		31.5455																												749.428		1179.75
YER152C	YER152C	Uncharacterized protein YER152C	P10356	No	No	23.5			24.9869																																300.399
YER134C	YER134C	Putative magnesium-dependent phosphatase YER134C	P40081	No	No	46.6	26.7964	27.2725	26.7556	27.8881	39.3205	27.38	27.306	27.2646	27.1488	6.62917	27.4468	27.0147	26.6147	26.4998	31.0127	26.9692	26.8496	27.0081	27.047	5.80949	27.5754	27.965	27.7919	13.3977	0.096721	0.73104	-0.284145	0.435887	-0.209679	0.463047	0.599312	0.125815	2549.23	3545.96	2478.14	367.944	3820.24	3629.29	3526.71	3254.62	4001.34	2965.68	2247.61
YER079W	YER079W	Uncharacterized protein YER079W	P40052	No	No	42.9	24.3378		23.9519		18.8008	24.1225	24.5529		25.3267	43.5515	26.3537	27.0452	25.525	26.8307	40.4765	27.3173	25.8441	25.5454	26.9844	55.7481	26.702	26.0205	27.1928	38.7251	0.522532	0.353384	2.29382	0.0115351	2.27796	0.0255145	2.49359	0.0124501	408.662		312.756		352.016	474.386		811.06	1652.8	2669.23	930.558
YER034W	YER034W	Uncharacterized protein YER034W	P40022	No	No	48.6	26.3238	26.1929	25.6512		23.0257											26.4914			26.4716	0.971239	26.5582		26.8908	16.2287					0.425528	0.207864	0.668495	0.107009	1772.28	1618.55	1111.83
YEL020C	YEL020C	Putative 2-hydroxyacyl-CoA lyase	P39994	No	No	17.3																					23.7009
YEH2	YLR020C	Sterol esterase 2	Q07950	No	No	12.6																						28.706
YEF3	YLR249W	Elongation factor 3A	P16521	No	No	68.9	36.1151	36.2492	36.1552	36.2254	4.28242	35.5719	35.6561	35.6757	35.7312	4.54368	35.221	35.1786	35.2003	35.1736	1.51244	35.3283	35.3669	35.297	35.338	1.9966	35.5404	35.4487	35.4709	3.34034	-0.527544	2.40606e-05	-0.992826	8.67656e-08	-0.853697	2.70371e-07	-0.699553	1.66133e-05	287017	314963	295100	20981.2	196958	208789	211647	219945	154439	149966	152237
YDR476C	YDR476C	Uncharacterized protein YDR476C	Q03362	No	No	29	26.1533	26.5277	25.8988	26.6512	23.2236	26.6584	27.6637	27.1864	27.2504	27.6975	27.459	27.2346	27.5129	27.5312	9.08375	27.651	26.7286	27.6566	27.8637	29.6461	27.6122	28.0215	28.0423	15.9341	0.881979	0.0168371	1.12667	0.000907484	1.16722	0.00892176	1.58424	0.00109839	1320.74	1712.03	1107.14	126.303	1874.38	3762.56	2702.74	2825.37	3264.77	2794.58	3389.17
YDR391C	YDR391C	Uncharacterized protein YDR391C	Q04170	No	No	17.7						25.6433	26.0847		25.5809	19.8937							26.0992		25.3157	37.4866																	891.874	1211.05		854.112
YDR333C	YDR333C	Uncharacterized protein YDR333C	Q05468	No	No	9.1	24.9119							25.3786	25.1376	11.7844		25.0052					25.6242				24.7821	24.5365		12.008	0.346254		0.0933493		0.712351		-0.252544		169.17						233.791	197.825		180.478
YDR248C	YDR248C	Probable gluconokinase	Q03786	No	No	28.5	25.934		26.0376		5.07659		26.3097	25.9997	26.1266	10.8876	26.0026		26.9777	26.5624	32.63	26.9727	26.2523	26.1585	26.2876	28.8294		26.3167	26.4538	6.71562	0.159501	0.28352	0.528424	0.245288	0.431953	0.200638	0.39945	0.0432988	1292.63		1388.89			1677.08	1352.84	1477.26	1355.58		2664.74
YDR161W	YDR161W	UPF0661 TPR repeat-containing protein YDR161W	Q03771	No	No	33.6	25.7342	27.1469	26.3935	26.5572	39.3126	26.3196	26.657	26.6197	26.3106	12.9426	26.4878	26.897	26.2667	26.4837	19.0742	26.7524	26.5764	26.4554	26.3883	11.2984	26.916	26.8952	27.1475	9.95831	0.0188277	0.952812	0.0758836	0.81983	0.0852068	0.7868	0.528314	0.191858	581.133	1547.16	917.812	69.6242	871.991	1101.75	1073.64	866.576	979.823	1301.13	840.61
YDR109C	YDR109C	Uncharacterized sugar kinase YDR109C	Q04585	No	No	8.5																						25.5181	25.7007	8.93826
YDL144C	YDL144C	Uncharacterized protein YDL144C	Q07589	No	No	38.8			25.8392	26.4367	28.8748		26.6986	26.946		12.0998	26.9203	27.217	27.2626		12.4059	26.3251	26.0255	26.8027		27.7022	26.9841	27.29	26.9954	12.4052	0.684332	0.168565	0.9953	0.0321134	0.246448	0.550333	0.951877	0.0343535			674.664	69.1343		1224	1453.04		1427.3	1753.22	1809.53
YDL121C	YDL121C	Uncharacterized protein YDL121C	Q07541	No	No	38.9	27.7891	28.1198	27.7171	27.7705	13.4003	27.6246	27.4413	27.0727	27.869	22.5097	26.9254		27.7273	26.9549	33.7449	27.4104	27.0261	27.7548	27.5256	20.2744	27.3088	27.1823	27.6207	16.0457	-0.347233	0.119098	-0.64655	0.0459669	-0.419871	0.0559937	-0.478481	0.0264153	6118.49	7694.81	5820.64	409.071	5459.21	4807.84	3723.8	6466.99	3362.37		5862.32
YDL119C	YDL119C	Solute carrier family 25 member 38 homolog	Q07534	No	No	12.7
YDL086W	YDL086W	Putative carboxymethylenebutenolidase	Q07505	No	No	55.7	27.3851	27.6896	27.2176	27.9782	23.6582	28.3213	28.6643	28.3006	28.6137	13.1878	28.575	29.0255	28.8462	28.9429	13.0002	28.8925	29.0706	29.1508	29.3693	13.8255	29.7875	29.9751	29.8586	6.61296	0.907349	0.00334751	1.27977	0.000592692	1.55315	0.000208831	2.30611	9.50219e-05	2541.32	3138.52	2262.8	259.62	4862.69	6168.15	4793.53	5955.31	5797.56	7922.77	6996.6
YDL057W	YDL057W	Putative uncharacterized protein YDL057W	Q07379	No	No	10.4																						24.1102
YCT1	YLL055W	High affinity cysteine transporter	Q12235	No	No	7.9
YCR075W-A	YCR075W-A	Uncharacterized protein YCR075W-A	Q3E830	No	No	25.3
YCP4	YCR004C	Flavoprotein-like protein YCP4	P25349	No	No	72.9	30.2957	29.9749	30.1898	30.0589	9.84144	30.8818	31.1404	30.8874	30.9073	8.99532	31.3637	31.1703	31.3793	31.0943	9.74654	31.3391	31.2986	31.243	31.4417	5.87731	31.3446	31.1702	31.3826	7.68842	0.824403	0.000124035	1.12207	3.02096e-05	1.20077	6.50131e-06	1.16933	8.06009e-05	22363.2	17904.1	20780.1	1285.25	33570.2	40162.1	33702.6	34169.2	46886.3	41002	47393.7
YCK3	YER123W	Casein kinase I homolog 3	P39962	No	No	27.5	26.6407	26.6071	26.8382	26.5941	8.17053		26.5118	26.7071	26.7275	8.05798	26.1951	26.395	26.2961	26.4505	7.73069	26.5094	26.6757	27.1117		22.3205	26.3942	26.9105	26.569	18.611	-0.0212041	0.82032	-0.335862	0.0057146	0.0955685	0.586802	-0.0454448	0.764425	776.293	758.413	890.182	50.8994		709.919	812.871	824.445	570.011	654.704	611.323
YCK2	YNL154C	Casein kinase I homolog 2	P23292	No	No	55.3	29.2677	29.8864	29.8554	30.0845	22.1566	29.5164	29.4291	29.356	29.5632	6.34801	29.3272	29.6177	28.9134	29.0618	21.9401	29.3835	29.1782	29.1112	29.055	10.2582	29.0363	29.1436	29.0328	4.41959	-0.307349	0.142216	-0.543501	0.0596931	-0.591547	0.020812	-0.702588	0.0206187	4654.95	7147.68	6995.94	555.3	5530.59	5205.85	4948.95	5712.95	4850.85	5932.9	3641.25
YCK1	YHR135C	Casein kinase I homolog 1	P23291	No	No	38.7	28.8838	29.1278	28.9926	29.0768	7.30564	29.0575	28.9991	29.2764	29.0393	8.96319	28.9344	29.1478	28.9109	28.7111	12.4171	28.9829	29.1948	29.0831	28.891	9.09092	28.8164	28.8485	28.8819	2.27194	0.0727915	0.409055	-0.0942161	0.400001	0.0176851	0.840908	-0.17132	0.0463838	3588.47	4249.69	3869.49	277.811	4047.49	3886.95	4710.74	3996.71	3716.49	4309.1	3656.5
YCH1	YGR203W	CDC25-like phosphatase YCH1	P42937	No	No	35.1			27.8719			27.3201	28.0185	27.744		23.5988	28.6525	28.1699	28.2398	27.7689	25.0983	28.4115	28.0534	28.262	28.2783	10.0559		27.0826	27.0047	3.81668	-0.17771		0.335854		0.379394		-0.828221				6367.1		4343.41	7048.06	5826.89		10937.8	7827.77	8216.34
YCF1	YDR135C	Metal resistance protein YCF1	P39109	No	No	34.5	29.5718	29.4068	29.0097	29.2055	16.7453	29.532	30.1237	29.8692	29.8845	16.429	30.3036	30.0778	30.453	30.2396	10.7344	30.3514	30.4699	30.4718	30.6822	9.754	30.2581	30.6457	30.2801	15.6788	0.553915	0.0182356	0.970022	0.000533175	1.19537	0.000141654	1.0962	0.00166559	2084.95	1859.57	1412.17	109.54	2028.23	3056.66	2562.27	2589.55	3462.42	2960.77	3840.22
YBT1	YLL048C	ATP-dependent bile acid permease	P32386	No	No	22.8	28.2293	28.7164	28.6238	28.2121	18.1282	27.5094	28.5039	28.3697	28.4	27.0259	28.3249	28.3849	28.3294	28.1767	6.0412	28.4789	28.2869	28.068	28.5403	14.3179	28.3316	28.7158	28.4329	14.1537	-0.249656	0.382972	-0.141427	0.346639	-0.101858	0.568699	0.048041	0.802945	743.746	1042.5	977.646	49.7729	451.561	899.719	819.759	837.179	794.705	828.457	797.21
YBR201C-A	YBR201C-A	Putative uncharacterized protein YBR201C-A	Q2V2Q3	No	No	19.4																						25.6173
YBR126W-A	YBR126W-A	Uncharacterized protein YBR126W-A	Q8TGU7	No	No	27.9	25.884		25.9123		1.38508	26.602			25.6662	44.3237			26.7588					26.5908	26.2183	18.1564	25.9702	25.3862		28.2409	0.235933	0.6643	0.86058		0.506359	0.113389	-0.219946	0.530355	3568.34		3638.93		5869.44			3068.23			6543.05
YBR085C-A	YBR085C-A	Uncharacterized protein YBR085C-A	O43137	No	No	87.1							26.2018					26.2051									26.3293	27.1815	26.7339	29.4404														3669.35				3677.86
YBP2	YGL060W	YAP1-binding protein 2	P53169	No	No	10			28.3946	28.2208	8.51009	28.4188	28.0663	28.4378	28.5922	14.6576	28.4719	28.5424	28.6336	28.9367	14.8686	27.644	28.251	28.5938	28.4092	25.7461		28.7428	28.1675	27.8299	0.0710506	0.705555	0.338424	0.105694	-0.0832366	0.803588	0.147467	0.672172			2158.32	129.574	2194.83	1718.99	2223.82	2475.01	2276.97	2391.16	2547.12
YBP1	YBR216C	YAP1-binding protein 1	P38315	No	No	16						27.3534	27.7253	27.4476		13.7464	27.4929	27.5469	27.5281	27.7203	7.22917		27.5779		27.3204	12.5874	27.2723																986.149	1276.12	1052.69		1086.28	1127.74	1113.13
YAT2	YER024W	Carnitine O-acetyltransferase YAT2	P40017	No	No	26.8																	25.4923				25.8936	25.968	25.1563	28.013
YAT1	YAR035W	Putative mitochondrial carnitine O-acetyltransferase	P80235	No	No	20.1																						25.6543	25.4428	10.3518
YAR1	YPL239W	Ankyrin repeat-containing protein YAR1	P46683	No	No	78.5	27.4947	28.6369	27.8046	28.0277	35.4379	27.8616	28.3766	28.1831	28.1292	14.4422	28.2763	28.0971	28.4056	28.088	10.7377	28.4423	28.3076	28.2084	28.6696	14.184	28.2792	28.0758	28.4447	12.6961	0.146666	0.598327	0.225743	0.407067	0.415988	0.162453	0.275601	0.399403	3782.35	8348.29	4688.54	370.613	4877.53	6970.11	6095.12	5871.72	6501.71	5742.32	7111.3
YAP3	YHL009C	AP-1-like transcription factor YAP3	P38749	No	No	15.8
YAP1802	YGR241C	Clathrin coat assembly protein AP180B	P53309	No	No	10.6	25.7254						25.7102	25.1403	25.0847	25.3451				24.9305		25.0862	25.1502			3.13674		25.0025			-0.413648		-0.794855		-0.607157		-0.722913		385.578					381.533	257.033	247.317
YAP1801	YHR161C	Clathrin coat assembly protein AP180A	P38856	No	No	18.5			26.7561	27.4201	31.9843		27.4265	27.0172		19.9245	27.4437			27.9064	22.4843	27.9213			27.8541	3.29072	27.3427	27.3201	27.3	1.48317	0.133739	0.764355	0.586944	0.28401	0.799592	0.13882	0.232837	0.417048			707.15	75.8828		1125.42	847.469		1138.96
YAP1	YML007W	AP-1-like transcription factor YAP1	P19880	No	No	29.2	25.4781	25.5082	25.8772	25.8596	14.9601	25.8206		25.8878	25.6349	8.90027	25.9064	25.9196	25.9233		0.615116	25.6799	25.6284	25.6195	25.7717	4.91116	25.2167	25.3977		8.85966	0.100305	0.514862	0.235649	0.126191	-0.00589718	0.960435	-0.37359	0.0956073	288.104	294.163	379.912	25.4163	365.29		382.704	321.168	387.672	391.241	392.24
YAL044W-A	YAL044W-A	Uncharacterized bolA-like protein YAL044W-A	Q3E793	No	No	32.7														24.8607
YAK1	YJL141C	Dual specificity protein kinase YAK1	P14680	No	No	9.2
YAF9	YNL107W	Protein AF-9 homolog	P53930	No	No	20.8
XRS2	YDR369C	DNA repair protein XRS2	P33301	No	No	4.8
XRN1	YGL173C	5-3 exoribonuclease 1	P22147	No	No	51.2	31.3684	31.7243	31.5326	31.4512	10.8058	31.4903	31.7285	31.6964	31.6448	7.12718	31.5963	31.4201	31.5899	31.4758	5.98756	31.2561	31.2141	31.2782	31.419	6.29277	31.0744	30.9645	30.9145	5.72185	0.120865	0.239948	0.00141313	0.987664	-0.227259	0.0419021	-0.534656	0.00286366	7063.91	9040.24	7915.75	506.635	7686.67	9066.48	8866.97	8555.84	8273	7321.78	8236.3
XPT1	YJR133W	Xanthine phosphoribosyltransferase 1	P47165	No	No	57.9	27.3463	27.3788	27.5313	26.9064	17.3419		26.1945	26.3486	26.0855	9.22572				26.8192		26.5035	27.0955	27.0111	26.3509	25.0146	26.039	26.6751	26.5123	21.6412	-1.08115	0.00146802	-0.471488		-0.550451	0.0522255	-0.881927	0.011227	3222.83	3296.31	3663.67	160.902		1450.51	1614.04	1344.91
XKS1	YGR194C	Xylulose kinase	P42826	No	No	11.2	24.9909						25.8498		26.2098	17.5546			25.7575	25.8361	3.85228		25.6814				26.3814				1.0389		0.805917		0.690447		1.39052		218.207					395.749		507.922			371.228
WWM1	YFL010C	WW domain-containing protein WWM1	P43582	No	No	43.6	28.7626	28.8997	28.5795	29.3438	23.8351	29.6932	29.4443	29.3427	29.129	16.348	29.7934	30.0522	29.7602	29.8452	9.40647	29.6271	29.5193	29.4504	29.7216	8.30608	29.69	29.6769	29.4737	8.1955	0.505937	0.0451928	0.966347	0.00151064	0.683214	0.00764479	0.717162	0.0162211	8987.66	9883.23	7916.06	910.595	17130.5	14416.7	13436.1	11586.4	18362.5	21970.9	17944.9
WTM2	YOR229W	Transcriptional modulator WTM2	Q12206	No	No	29.6	25.66	26.3979	25.9633	26.1516	21.2213		26.3863	25.7562		30.3999	26.5347	26.4467	26.2057	26.0057	16.2264	26.5699	26.6031	26.8627	27.2411	22.6504	26.378	26.5206	26.6096	8.02002	0.0280664	0.930623	0.254999	0.241821	0.77599	0.0123479	0.459535	0.0627265	456.294	760.94	563.044	43.4467		754.873	487.758		836.674	787.146	666.041
WTM1	YOR230W	Transcriptional modulator WTM1	Q12363	No	No	48.7	31.2987	31.5823	31.7298	31.3845	13.5812	31.4887	31.5053	31.548	31.5303	1.81939	31.8095	31.7686	31.8436	31.7409	3.13486	32.1751	32.0141	31.9464	32.1123	7.03183	32.2334	32.2955	32.2036	3.26548	0.0192435	0.850984	0.291817	0.0265176	0.56314	0.00215057	0.745364	0.00142359	24409.9	29712.3	32911.5	1754.36	27846.6	28168.2	29013.7	28659.8	34779.1	33807.9	35612.6
WSC2	YNL283C	Cell wall integrity and stress response component 2	P53832	No	No	6.8						25.7241	25.3619			17.661																											473.907	368.682
WRS1	YOL097C	Tryptophan--tRNA ligase, cytoplasmic	Q12109	No	No	67.6	31.2235	31.5021	31.3938	31.2955	8.44523	30.8475	31.15	31.1316	31.1082	9.3873	30.7629	30.4616	30.6425	30.5333	9.19861	30.5914	30.6328	30.5389	30.8129	8.47897	30.3871	30.5748	30.4469	6.71615	-0.294418	0.019747	-0.753646	0.000151991	-0.709736	0.000158983	-0.884143	0.000143837	22715.3	27554	25561.8	1617.11	17504.2	21586.4	21313.7	20970.4	16506.7	13395.6	15185.8
WHI4	YDL224C	Protein WHI4	Q07655	No	No	13.3																25.0083		24.8159		9.41736
WHI3	YNL197C	Protein WHI3	P34761	No	No	23.4	26.8013	27.2223	27.5188	26.7441	25.9456	27.2596	26.9294	27.1084	26.4272	23.0956	27.4548	27.1878	26.8994		19.0941	26.4854		26.6834	26.9477	16.2054	27.0131	26.5914	26.242	26.8476	-0.140461	0.605226	0.109067	0.686647	-0.366125	0.193889	-0.456147	0.171632	733.841	982.512	1206.65	47.7641	1008.24	801.986	907.905	566.222	1154.32	959.296	785.483
WHI2	YOR043W	Growth regulation protein	P12611	No	No	21	26.0664	26.4461	27.3554	26.6267	40.1412	27.1839	26.7907	27.0498	27.1178	11.4195	26.9174	27.412	27.2752	27.7571	23.9269	26.7991	26.7197	27.8058	27.3293	36.5131	27.1312	27.4501	27.7056	19.6312	0.411888	0.196877	0.716791	0.0672363	0.539835	0.195373	0.805323	0.0690365	567.663	738.543	1387.13	56.6888	1231.62	937.811	1122.32	1176.52	1023.93	1442.62	1312.16
WBP1	YEL002C	Dolichyl-diphosphooligosaccharide--protein glycosyltransferase subunit WBP1	P33767	No	No	54.2	29.4223	29.4396	29.7478	29.0605	19.1941	29.3497	30.0807	29.6281	29.6116	21.9847	30.1709	29.9931	30.1952	30.164	6.23581	30.1025	29.8614	30.0124	30.1772	9.25639	29.7999	30.2916	29.9163	18.4277	0.249999	0.272288	0.713272	0.00294294	0.620862	0.00730767	0.585092	0.0371349	6512.38	6590.95	8160.59	343.207	6192.84	10278.7	7511.19	7425.47	10942.2	9673.11	11127.8
VTS1	YOR359W	Protein VTS1	Q08831	No	No	19.7	26.4936																																733.958
VTI1	YMR197C	t-SNARE VTI1	Q04338	No	No	36.4	28.5298	29.5021	26.8539	29.3885	60.2607	27.5382	28.4121	27.7362	27.6144	30.7935	27.9519	28.3705	28.1644	28.4981	16.282	28.4661	27.944	28.9352	28.3026	29.1258	28.6848	28.8747	28.0131	28.7173	-0.743342	0.291751	-0.322364	0.623371	-0.156595	0.816275	-0.0444045	0.955421	7024.31	13781.1	2198.31	862.628	3532.64	6473.87	4052.27	3724.21	4705.65	6289.91	5452.38
VTC4	YJL012C	Vacuolar transporter chaperone 4	P47075	No	No	46.3	30.4707	30.764	30.8775	30.5404	13.2028	30.5127	30.6031	30.6614	30.7525	6.9813	30.9906	30.8384	30.8773	31.0453	6.69212	30.7651	30.8215	30.931	30.9541	6.18621	30.3629	30.6563	30.5799	10.3021	-0.0307511	0.784451	0.27474	0.0417869	0.204753	0.099115	-0.130141	0.376987	8000.53	9803.87	10606.6	568.615	8236.56	8769.4	9130.71	9725.91	11471.2	10322.7	10605
VTC3	YPL019C	Vacuolar transporter chaperone 3	Q02725	No	No	46.1	28.8939	29.4435	28.9143	29.2885	19.1015	29.0378	29.377	29.1669	29.2249	9.80013	29.3134	28.9576	29.4632	29.4567	15.3617	29.0138	28.9891	29.2582	29.2068	9.391	28.9963	29.0115	29.1817	7.27403	0.0665854	0.680749	0.162656	0.404	-0.0180891	0.909694	-0.0718893	0.689394	2309.79	3380.71	2342.71	205.638	2551.97	3228.55	2790.96	2905.43	3089.17	2414.12	3427.2
VTC2	YFL004W	Vacuolar transporter chaperone 2	P43585	No	No	45.2	29.9434	30.3266	30.2041	30.0908	11.2437	29.9978	30.2852	30.1958	30.4358	12.5299	30.2829	30.1097	30.4364	30.4413	10.5805	30.2035	30.4038	30.4915	30.45	8.53873	30.1161	30.222	30.1189	4.2344	0.087426	0.502682	0.176401	0.170239	0.245995	0.0552183	0.0111438	0.916365	4836.34	6307.75	5794.33	362.775	5022.31	6129.27	5761.07	6803.85	6119.9	5427.53	6806.66
VTC1	YER072W	Vacuolar transporter chaperone 1	P40046	No	No	20.2	28.6156	28.6796	27.7202	27.8978	32.8391	28.5072	28.493	28.7911	28.5916	9.8403	28.6436	29.0046	28.6822	29.0195	13.9427		29.0729	28.93	29.0225	4.98669		28.47	28.6783	10.1917	0.367436	0.199015	0.609213	0.0613216	0.78016	0.0443246	0.34583	0.406534	12795.6	13375.8	6878.92	526.874	11869.4	11753.4	14450.7	12584.3	13046.6	16756.3	13400.1
VTA1	YLR181C	Vacuolar protein sorting-associated protein VTA1	Q06263	No	No	22.1	26.2449	26.998	26.7083	27.4152	33.4717	27.4111			26.2614	53.5458	27.4406		27.3709	27.1316	10.9241	27.6036	27.4062	27.6976	27.5275	8.47961	27.4233	27.3407	27.6203	10.1253	-0.00535638	0.992126	0.472788	0.177792	0.717115	0.0301218	0.619837	0.0932409	952.85	1605.9	1313.78	145.229	2138.36			963.801	2182.57		2079.65
VRP1	YLR337C	Verprolin	P37370	No	No	30.7	28.1919	28.6104	28.0376	28.6229	20.1359	28.8564	28.8283	28.5966	28.763	7.8404	28.6539	28.8772	28.842	28.9664	8.89678	28.5502	28.6583	28.6251	28.4185	7.22812	27.9694	28.3375	28.0717	13.4751	0.39538	0.0476785	0.469198	0.0276066	0.197327	0.256978	-0.239485	0.28053	1659.86	2218.39	1491.45	151.54	2630.88	2580.05	2197.28	2465.94	2286.27	2669.1	2604.79
VRG4	YGL225W	GDP-mannose transporter 1	P40107	No	No	2.7	24.9109		24.8929	23.7732	38.2566	25.7432	25.3984	24.8161	24.7107	34.2299	26.0479	25.3888	25.6359	25.5973	20.0271	25.8263	25.6806	25.9169	26.142	13.6337	25.0173	25.4599	25.3638	15.4691	0.641452	0.193752	1.14182	0.023459	1.3658	0.00955852	0.754669	0.13192	380.98		376.258	11.7267	678.347	534.162	356.765	331.631	837.857	530.612	629.758
VPS75	YNL246W	Vacuolar protein sorting-associated protein 75	P53853	No	No	15.9								25.442													24.854	25.2373		18.6759															665.683
VPS74	YDR372C	Vacuolar protein sorting-associated protein 74	Q06385	No	No	38.6	27.9061	27.909	27.3368	28.0292	19.4407	27.774	27.9767	27.9922	27.8574	7.09444	28.5112	28.1929	28.5285	28.4128	10.2802	28.3493	28.2889	28.3478	28.5459	8.01807	28.6517	28.566	28.5761	3.27743	0.104778	0.546169	0.616067	0.0120852	0.587687	0.0119983	0.802661	0.0074995	2862.42	2868.11	1929.11	211.122	2611.94	3005.93	3038.36	2767.39	4353.95	3491.88	4406.53
VPS72	YDR485C	Vacuolar protein sorting-associated protein 72	Q03388	No	No	2.1	27.9924		28.0635	27.8952	5.82817		26.7607		27.1302	18.0121	27.2285	27.0855	26.6388	27.0119	16.4734	27.5234	27.0912	26.8266	26.3761	32.9111	28.0771	26.6532	27.3077	48.8271	-1.03828	0.00635084	-0.992523	0.00134949	-1.02935	0.0158244	-0.637684	0.198665	1318.05		1384.59	83.4418		561.218		725.043	776.179	702.93	515.758
VPS68	YOL129W	Vacuolar protein sorting-associated protein 68	Q12016	No	No	10.9			24.0115																																376.141
VPS60	YDR486C	Vacuolar protein-sorting-associated protein 60	Q03390	No	No	26.2	26.9283		26.9663	27.2032	10.5922	27.8142	24.7766	25.1138	25.1933	118.851	28.3221	28.2056	28.3654	28.5145	8.92012	27.8952	27.9024	28.09	27.6875	11.3367	27.8572	27.7127	27.8284	5.23127	-1.30814	0.177643	1.31929	5.497e-05	0.861172	0.000850018	0.766812	0.0013681	2207.9		2266.85	180.914	4080.05	496.884	627.705	663.268	5801.62	5351.61	5978.31
VPS54	YDR027C	Vacuolar protein sorting-associated protein 54	Q12071	No	No	12.9	24.848	24.2481	24.5568	23.2513	40.4439	23.711	23.1982	24.7949	22.9119	64.0305	24.3465	24.6694	23.8587	24.1791	23.3526	25.2368	24.4621	25.5802	24.9431	31.5614	25.4168	25.0164	25.8738	29.6931	-0.572048	0.330909	0.0373501	0.926097	0.829471	0.0958825	1.2096	0.0466101	132.996	87.7541	108.691	2.978	60.4757	42.385	128.192	34.7555	93.9461	117.508	66.9936
VPS52	YDR484W	Vacuolar protein sorting-associated protein 52	P39904	No	No	13.1																					24.9191	25.3493		20.929
VPS51	YKR020W	Vacuolar protein sorting-associated protein 51	P36116	No	No	20.1																					22.698
VPS5	YOR069W	Vacuolar protein sorting-associated protein 5	Q92331	No	No	23.1	25.6204		26.0828		22.4724	26.3175	27.0556	26.8463	27.3853	29.4441	27.0343		27.4679	27.3962	15.3791	26.9984	26.9982	27.1163	27.32	10.8665	26.9761	27.6128	26.5341	38.0934	1.04951	0.0450633	1.44782	0.00960393	1.25661	0.0022918	1.18935	0.0733667	301.543		415.481		488.861	815.412	705.279	1024.75	803.487		1085.13
VPS45	YGL095C	Vacuolar protein sorting-associated protein 45	P38932	No	No	32.1	25.3476		24.9399	26.6702	66.6833	26.0543	25.4329	26.2431	25.1368	34.6227	26.4338	26.6807	26.5266	26.0701	17.064	26.353	26.4747	26.545	26.8324	14.6342	26.4518	26.5782	26.5221	4.37625	0.064207	0.908981	0.77523	0.154975	0.898704	0.10419	0.864781	0.173907	284.847		214.724	48.2478	464.886	302.199	529.892	246.113	604.771	717.637	644.953
VPS41	YDR080W	Vacuolar protein sorting-associated protein 41	P38959	No	No	6.8																						24.2397
VPS4	YPR173C	Vacuolar protein sorting-associated protein 4	P52917	No	No	51.9	27.9449	27.9977	28.137	27.1937	25.4997	28.1359	28.0363	27.7786	28.0017	10.1403	28.265	28.298	28.286	28.0842	6.72501	28.0107	28.2191	28.4115	28.1411	11.782	27.9583	28.5389	28.4415	20.2237	0.169828	0.479176	0.415003	0.105589	0.377313	0.149149	0.494615	0.15161	2397.98	2487.36	2739.53	96.4819	2737.58	2554.84	2136.9	2494.32	2993.74	3063.07	3037.64
VPS35	YJL154C	Vacuolar protein sorting-associated protein 35	P34110	No	No	10.1						24.9803					25.1943	25.2206	25.1713	25.3115	4.31914		25.3458				25.1982																135.595				157.274	160.17	154.791
VPS34	YLR240W	Phosphatidylinositol 3-kinase VPS34	P22543	No	No	3.2
VPS33	YLR396C	Vacuolar protein sorting-associated protein 33	P20795	No	No	10.4																						25.3974
VPS28	YPL065W	Vacuolar protein sorting-associated protein 28	Q02767	No	No	24.8
VPS24	YKL041W	Vacuolar protein-sorting-associated protein 24	P36095	No	No	26.3	25.6066		26.3223		34.3753			26.1901			26.3823	26.433		26.7401	13.8584		26.6477	26.7821	27.3698	28.0411	26.8012	27.8272	26.6471	48.002	0.225655		0.554004	0.165188	0.968762	0.0895727	1.12737	0.131606	870.472		1429.54				1304.38		1490.22	1543.55
VPS21	YOR089C	Vacuolar protein sorting-associated protein 21	P36017	No	No	86.2	28.3867	28.9045	28.8793	28.5587	17.0962	28.4863	28.9033	28.9294	28.7417	13.5124	28.7991	28.7043	28.9642	28.7502	8.05546	29.0915	28.9774	28.8811	28.862	7.40865	29.0652	29.4282	29.2001	12.8916	0.0828676	0.627417	0.122136	0.411005	0.270664	0.0949383	0.54885	0.0250326	6798.13	9733.75	9564.84	518.697	7284.14	9725.42	9903.05	8694.71	9047.84	8472.53	10144.6
VPS17	YOR132W	Vacuolar protein sorting-associated protein 17	P32913	No	No	32.1			25.1972			26.0235	25.9662	25.8128	26.2303	12.1236	26.3303	26.6732	26.5215	26.2987	12.322	26.2256	26.0625	26.2038	25.9817	7.99312	26.5488	26.2326	26.2878	12.0284	0.810962		1.25869		0.921189		1.15916				272.134		482.506	463.725	416.952	556.903	596.878	756.982	681.439
VPS16	YPL045W	Vacuolar protein sorting-associated protein 16	Q03308	No	No	7
VPS13	YLL040C	Vacuolar protein sorting-associated protein 13	Q07878	No	No	31.5	28.7069	29.0038	28.9052	29.2163	14.7154	28.9762	29.5826	29.2488	29.156	18.2401	29.1432	28.6668	28.8137	28.5365	18.8421	29.2494	28.9881	29.1288	29.0231	8.27633	28.8607	29.3997	29.0519	19.337	0.282865	0.138289	-0.16799	0.356422	0.13932	0.294028	0.146055	0.458743	547.445	672.521	628.081	52.7732	659.803	1004.47	796.998	747.372	740.75	532.44	589.512
VPS1	YKR001C	Vacuolar protein sorting-associated protein 1	P21576	No	No	78.1	31.7581	32.0219	31.5651	31.7078	13.6067	31.9707	32.0414	32.1206	32.0825	4.41511	32.0506	31.9462	32.29	32.1551	10.2416	32.0901	32.0818	32.0733	32.1762	3.36024	31.936	32.1782	32.0071	8.75807	0.290568	0.0278344	0.34723	0.0279444	0.342125	0.0131753	0.277224	0.0824509	20623.9	24761.8	18040.8	1348.87	23898.1	25097.9	26515.3	25824.2	25258.6	23496.1	29817.8
VPH2	YKL119C	Vacuolar ATPase assembly integral membrane protein VPH2	P32341	No	No	14.4																						25.0997	24.8296	13.1997
VPH1	YOR270C	V-type proton ATPase subunit a, vacuolar isoform	P32563	No	No	35.8	30.8024	30.6603	30.5646	30.6854	6.81569	30.2608	30.6798	30.7051	30.7115	14.0469	31.0097	30.588	31.0804	30.873	14.3956	30.9067	30.7911	30.8972	30.9706	5.09966	30.8994	30.9611	31.0304	4.54557	-0.0888829	0.48725	0.209597	0.12942	0.213225	0.013298	0.285488	0.00751189	8764.22	7942.37	7432.22	547.291	6021.13	8050.01	8192.76	8228.8	10118.7	7553.91	10626.5
VNX1	YNL321W	Low affinity vacuolar monovalent cation/H(+) antiporter	P42839	No	No	11.3	26.1898	24.4889	26.64	25.7951	51.6895	26.7847	26.8196	26.4158	26.4295	15.1486	26.689	26.7434	26.6651	27.0058	11.3721	27.2331	26.62	26.6495	26.4455	25.8294	26.3754	26.5467	26.9257	20.0639	0.83394	0.130373	0.997377	0.0779642	0.95859	0.100321	0.837496	0.19817	333.877	102.696	456.167	17.1993	504.278	516.623	390.503	394.219	471.913	490.059	464.149
VMA9	YCL005W-A	V-type proton ATPase subunit e	Q3E7B6	No	No	13.7	28.2333	27.6321	28.6371	28.3613	27.0406	28.6189	28.4812	28.6543	28.5228	5.59551	28.7396	29.08	28.6825	28.5942	15.5314	28.7995	28.7015	28.7065	28.6611	4.10888	29.1538	28.6861	28.7541	18.2319	0.35332	0.152821	0.558123	0.0568307	0.501146	0.0577656	0.648669	0.0676527	16833.9	11097.1	22270.9	1245.78	21991.9	19989.9	22537.1	20573.5	23910.8	30273.9	22983.1
VMA8	YEL051W	V-type proton ATPase subunit D	P32610	No	No	53.9	30.2991	30.2486	30.5622	30.2116	11.4979	30.3441	30.0209	30.2472	30.24	9.18648	30.5308	30.5763	30.5388	30.6381	3.42295	30.458	30.5806	30.4624	30.5396	4.18281	30.5027	30.4886	30.4492	1.91213	-0.11734	0.305174	0.240613	0.0273764	0.17976	0.0783721	0.149787	0.17494	20232.1	19536.8	24279.7	1289.58	20873.8	16683.7	19516.9	19420.4	23757.5	24518.6	23889.2
VMA7	YGR020C	V-type proton ATPase subunit F	P39111	No	No	60.2	26.9988	26.267	26.5461		26.1106	25.9967			26.1839	9.16353							25.7162				26.8574	27.0566	27.0494	7.64584	-0.513692	0.168173			-0.887841		0.38382	0.160295	4454.33	2682.2	3254.54		2223.85			2532
VMA6	YLR447C	V-type proton ATPase subunit d	P32366	No	No	45.8	28.5707	28.3862	27.8234	28.3719	20.4448	27.9568	28.9877	28.9724	28.674	29.0534	28.7401	27.997	28.0405	28.6029	26.1919	28.5221	28.8348	28.5595	28.9265	13.9006	29.1517	29.1986	28.918	10.1218	0.359693	0.261632	0.0570838	0.826837	0.422705	0.0676654	0.80141	0.0111414	4479.7	3941.93	2668.74	264.34	2927.29	5981.33	5917.96	4812.52	5038.04	3009.99	3102.13
VMA5	YKL080W	V-type proton ATPase subunit C	P31412	No	No	61.7	31.0562	30.8701	31.2967	31.1419	12.2241	31.0818	31.4985	31.3447	31.2009	12.5594	31.4038	31.2008	31.4111	31.1207	10.0475	31.273	31.2397	31.2654	31.4467	6.76455	31.2	31.3273	31.2803	4.43483	0.19025	0.183614	0.192854	0.144888	0.214974	0.076823	0.177962	0.165723	22591.5	19857.6	26689.2	1623.55	22996.2	30697	27591.8	24974.2	28745.2	24972.2	28893
VMA4	YOR332W	V-type proton ATPase subunit E	P22203	No	No	78.5	32.8526	32.93	33.0506	32.9414	5.69299	32.7266	32.7069	32.7492	32.7886	2.44063	32.7696	32.6978	32.814	32.832	4.09709	32.7939	32.7779	32.8288	32.9327	4.90776	32.7036	32.694	32.6729	1.08911	-0.200813	0.00398565	-0.165266	0.0170066	-0.11033	0.0851231	-0.253457	0.00348581	130990	138214	150260	9434.2	120035	118410	121935	125307	123673	117667	127536
VMA3	YEL027W	V-type proton ATPase subunit c	P25515	No	No	11.2																					26.1077	27.1837	26.7538	35.5718
VMA22	YHR060W	Vacuolar ATPase assembly protein VMA22	P38784-2	No	No	33			26.0877																																1557.35
VMA2	YBR127C	V-type proton ATPase subunit B	P16140	No	No	84.9	34.1009	34.2609	34.3913	34.0727	10.4309	34.171	34.1856	34.2482	34.1763	2.50881	34.0825	34.0429	34.0318	34.0093	2.1315	34.0126	33.9634	34.1264	33.9911	5.05383	33.9259	33.9087	33.9472	1.33717	-0.0111752	0.888448	-0.164842	0.0725972	-0.183075	0.0680636	-0.279216	0.0250693	142647	159377	174443	9473.22	149746	151271	157976	150296	140835	137018	135973
VMA13	YPR036W	V-type proton ATPase subunit H	P41807	No	No	59.2	30.6644	30.8487	30.3427	30.7373	14.3231	30.7143	31.2352	30.9744	31.0188	14.6419	31.0199	30.7169	31.0239	30.9346	9.58237	31.0804	31.1696	31.1051	31.3521	8.77208	31.3315	31.6195	31.5292	10.0148	0.337389	0.0688412	0.275548	0.0789619	0.528528	0.00547526	0.845129	0.00223089	13982.6	15888	11187.4	996.016	14474.8	20768.5	17334.1	17875.5	17889.5	14501.1	17938.8
VMA11	YPL234C	V-type proton ATPase subunit c	P32842	No	No	11	25.4228			24.9613	22.4298	24.378	24.9465	24.6677	25.2884	27.0632						24.8848									-0.371867	0.315274			-0.307262				1180.42			58.0544	572.166	848.526	699.416	1075.42
VMA10	YHR039C-A	V-type proton ATPase subunit G	P48836	No	No	92.1	32.0352	31.9682	32.0058	31.9217	3.38741	31.8833	31.5002	31.5924	31.6041	11.9592	31.832	31.6249	31.6329	31.7679	7.11937	31.9231	31.8042	31.8803	31.8096	3.99998	31.6764	31.4885	31.7889	10.372	-0.337746	0.00787032	-0.26833	0.00321439	-0.128463	0.0144851	-0.331484	0.00845625	154779	147756	151656	9689.16	139312	106820	113871	114796	134441	116463	117110
VIP1	YLR410W	Inositol hexakisphosphate and diphosphoinositol-pentakisphosphate kinase	Q06685	No	No	56.9	29.1373	29.5975	29.4819	29.4143	13.0272	29.4698	29.353	29.2123	29.0588	12.2014	29.2992	29.183	29.4653	29.536	10.9739	29.4197	29.2413	29.2994	29.3238	5.19827	29.0467	28.9601	29.0628	3.78718	-0.134249	0.348688	-0.0368516	0.780224	-0.0866806	0.438938	-0.384533	0.0229662	2034.65	2799.1	2583.67	166.954	2562.03	2362.83	2143.26	1926.93	2276.23	2100.19	2554.1
VID30	YGL227W	Vacuolar import and degradation protein 30	P53076	No	No	15.2	24.4753					25.4637			25.4908	1.32758							26.8306		25.9435	42.1618	26.2835	26.0122	25.8433	15.6089	1.00196				1.91179		1.57107		96.391				191.24			194.865
VID27	YNL212W	Vacuolar import and degradation protein 27	P40157	No	No	29.2	26.7048	27.3865	27.314	27.2586	19.4388	27.3127	27.283	27.7079	27.6228	14.915	27.9994	27.4998	28.0701	28.2668	20.9636	27.8435	27.6429	27.9724	27.8068	9.32126	27.8733	28.2405	27.6297	21.6252	0.31562	0.14685	0.793063	0.0126202	0.65041	0.00871612	0.748512	0.0250899	550.432	882.916	839.638	54.7222	838.883	821.824	1103.23	1040.02	1350.31	955.028	1418.15
VHT1	YGR065C	Vitamin H transporter	P53241	No	No	17.9	24.9506	25.7113		25.6022	26.0538	25.5538	25.6255		25.4665	5.50346	26.0257	25.9538	25.5516	25.9821	14.1214		25.7517	25.507	25.8044	10.6754	25.816	26.4213	26.1548	20.6539	0.12725	0.626665	0.456972	0.112302	0.266394	0.354384	0.709333	0.0740477	209.846	355.549		22.3246	318.775	335.026		300.058	442.136	420.63	318.29
VHS3	YOR054C	Phosphopantothenoylcysteine decarboxylase subunit VHS3	Q08438	No	No	17.2																					26.3893	26.1951	26.4805	9.91803
VHS2	YIL135C	Protein VHS2	P40463	No	No	43.8	26.5614	26.887	26.9469	26.4902	15.7698	27.2666	27.0125	27.3601	26.9639	13.3637	26.4857	26.5969			5.44716	26.6925	27.1311	27.1863	26.6287	19.8776	27.1088	26.7627	26.8532	12.734	0.429392	0.0284296	-0.180083	0.361885	0.188255	0.347254	0.186824	0.297907	923.217	1156.98	1206.02	59.5099	1505.17	1262.14	1605.94	1220.28	876.019	946.206
VCX1	YDL128W	Vacuolar calcium ion transporter	Q99385	No	No	11.2						26.687	27.6283	26.9273	27.0032	30.1282	27.4343	27.0598		26.8748	20.2583	27.2555	27.4762	27.2481	27.7799	18.1048	27.3407	28.4681	27.6525	42.4354													1081.93	2077.65	1278.01	1347.11	1816.18	1400.99
VBA4	YDR119W	Vacuolar basic amino acid transporter 4	Q04602	No	No	11.5								26.508	26.5891	3.97444			25.8949	26.8443	44.9268	26.6508	26.138			24.8722	26.366	26.4983		6.47952															497.965	526.763			325.565
VAS1	YGR094W	Valine--tRNA ligase, mitochondrial	P07806-2	No	No	75.9	33.6467	33.7094	33.6338	33.5864	3.52667	33.1141	33.3833	33.3278	33.3196	7.91105	33.1394	32.9725	33.2782	33.156	8.60804	33.111	33.1287	33.1363	33.2033	2.83145	32.9833	33.119	33.031	4.8014	-0.357905	0.00142282	-0.507566	0.000292228	-0.499268	4.73013e-06	-0.599669	4.15141e-05	50054.3	52280.1	49611.4	3251.17	34604	41702	40127.5	39900.5	35215.5	31368.8	38772.7
VAR1	Q0140	Ribosomal protein VAR1, mitochondrial	P02381	No	No	27.9	25.6573		25.8955		11.6495	26.1096	25.9664	26.4102	26.2152	13.0887	26.4247	26.0103		26.194	14.4704		26.1928		25.9487	11.9361		26.3026	26.1116	9.34369	0.398955	0.0649927	0.433283	0.0934633	0.29435	0.226497	0.430701	0.106004	502.085		592.229		686.993	622.04	846.123	739.129	854.662	641.281
VAN1	YML115C	Mannan polymerase I complex VAN1 subunit	P23642	No	No	15.9	26.1125	26.6836	27.2083	26.5521	31.7757	26.1868	26.4683		26.2141	11.0616							27.0075	26.5754	26.1393	29.7357	26.5237	26.6041	26.2465	12.5841	-0.349366	0.263272			-0.0650696	0.855527	-0.181004	0.549094	530.979	788.86	1134.81	48.7677	559.045	679.493		569.715
VAM7	YGL212W	Vacuolar morphogenesis protein 7	P32912	No	No	35.4			25.5927																			25.7382	25.4812	12.5641							0.0169692				616.293
VAC8	YEL013W	Vacuolar protein 8	P39968	No	No	38.2	28.9512	29.5068	29.0976	28.9825	18.9929	29.4569	29.5455	29.4903	29.6558	6.13549	29.8352	29.6519	29.5457	29.7865	9.00898	29.5134	29.6411	29.6739	29.8465	9.61787	29.8339	29.8979	29.8435	2.40801	0.402581	0.0247345	0.570256	0.00742519	0.534192	0.0103602	0.723908	0.0051031	3671.35	5396.01	4063.37	254.08	5212.6	5542.5	5334.47	5983.11	6775.13	5966.77	5543.35
VAC7	YNL054W	Vacuolar segregation protein 7	P53950	No	No	2																					23.4854		23.5498	3.15526
VAC14	YLR386W	Vacuole morphology and inheritance protein 14	Q06708	No	No	7.4			23.529																																54.2405
UTR4	YEL038W	Enolase-phosphatase E1	P32626	No	No	33	26.1174	25.8689	26.3292		15.8169	25.8096					26.0162			26.1426	6.19095	26.4146	26.5914	26.276	26.5782	10.1611	26.6088	27.254	26.4192	31.9441	-0.295576		-0.025755	0.894157	0.359882	0.052403	0.655524	0.0833307	1292.2	1087.8	1496.57		1043.95				1204.71
UTR2	YEL040W	Probable glycosidase CRH2	P32623	No	No	9	27.865	27.1998	28.2022	27.3967	31.6631	27.0409	27.0908	27.3557	27.2516	10.126	27.1907	26.9429	26.8282	27.0849	10.9829	27.0034	26.6237	26.6699	26.8931	12.5904	26.724	26.5373	26.5007	8.47152	-0.481135	0.0897887	-0.654229	0.0345131	-0.868405	0.0119607	-1.07857	0.0110728	2189.96	1380.99	2766.63	107.205	1237.02	1280.56	1538.66	1431.51	1372.39	1155.76	1067.43
UTR1	YJR049C	NAD(+) kinase	P21373	No	No	25.3	26.2811		26.3361		2.69304	26.883	26.6436	26.8449	26.2434	18.8847	27.1197	27.1208	27.1626	27.4436	11.3505	26.8772	27.1951	26.4973	26.9486	19.3331	26.9567	26.6119	26.7037	12.6625	0.345143	0.192427	0.9031	0.00157339	0.570968	0.0583716	0.448853	0.0446182	613.071		636.873		930.44	788.198	906.232	597.253	1096.36	1097.19	1129.44
UTP9	YHR196W	U3 small nucleolar RNA-associated protein 9	P38882	No	No	23.7	26.7196	27.377	27.8311	28.0225	36.0493							26.446									26.1972	26.9888	26.1105	35.9295			-1.04155				-1.05541	0.0516158	756.973	1193.92	1635.6	126.483						626.21
UTP8	YGR128C	U3 small nucleolar RNA-associated protein 8	P53276	No	No	30.3	26.9482	28.2913	27.4593	27.9963	38.7051			27.6729	26.9842	33.1264		28.23				27.2441	27.166	26.8888	26.9246	12.1945	26.9799	26.6697	27.192	17.8302	-0.345182	0.522214	0.556197		-0.617907	0.0930016	-0.72658	0.109339	721.907	1831.47	1028.83	101.098			1193.03	740.195		1755.26
UTP7	YER082C	U3 small nucleolar RNA-associated protein 7	P40055	No	No	43.3	28.4401	28.192	28.5479	27.9071	19.027	26.9458	27.0668	26.9976	27.1349	5.72304			27.5262	26.5648	45.4511	27.1543	27.4245	26.9559		16.4445	26.3553	26.7598	26.8824	18.2	-1.2355	0.000162944	-1.22626	0.0280371	-1.09352	0.00299814	-1.60593	0.000678359	2612.86	2200.1	2815.54	122.292	927.464	1008.61	961.328	1057.32			1386.78
UTP6	YDR449C	U3 small nucleolar RNA-associated protein 6	Q02354	No	No	17.3			25.4507																																391.141
UTP5	YDR398W	U3 small nucleolar RNA-associated protein 5	Q04177	No	No	18.4	26.3562	27.0457	26.7099	26.3081	24.6931																		26.6815								0.0765279		533.419	860.271	681.623	34.939
UTP4	YDR324C	U3 small nucleolar RNA-associated protein 4	Q06679	No	No	28.9	26.6922	26.3709	27.6568	26.9772	40.4449		27.0838	26.9274	26.0437	34.211	26.9879	27.1077	26.8168	26.246	23.839	26.3734	26.4541	25.9785	26.7436	21.2555	25.614	26.8332	26.322	40.1649	-0.239304	0.595424	-0.134666	0.700537	-0.536849	0.140251	-0.667872	0.188352	552.146	441.9	1077.56	45.5589		724.313	649.916	352.247	677.77	736.432	601.947
UTP30	YKR060W	Ribosome biogenesis protein UTP30	P36144	No	No	15.7	25.6638																																751.78
UTP25	YIL091C	U3 small nucleolar RNA-associated protein 25	P40498	No	No	19.8	27.512	27.4652	27.3751	27.2547	7.73672	26.6984	26.9931	26.8422	26.6476	10.9514			27.316				27.3962	26.9248		22.8996	26.3691	27.0101	26.2175	30.8092	-0.606412	0.000743436	-0.0857827		-0.241274	0.223156	-0.869532	0.00970005	1018.86	986.332	926.606	57.7268	579.694	711.071	640.432	559.626			889.397
UTP22	YGR090W	U3 small nucleolar RNA-associated protein 22	P53254	No	No	39.3	29.2103	29.4904	29.4951	28.9376	17.6701	28.1686	28.9471	28.6933	28.7916	21.3978	28.2269	28.241	28.428	28.3812	6.98003	28.3241	28.1517	28.3395	28.4513	8.44323	28.2539	28.7899	28.3382	20.8747	-0.633217	0.0257559	-0.96408	0.00050467	-0.96671	0.000588084	-0.822705	0.0112478	1976.85	2400.39	2408.16	110.817	960.227	1647.13	1381.45	1478.8	999.851	1009.65	1149.37
UTP21	YLR409C	U3 small nucleolar RNA-associated protein 21	Q06078	No	No	15.4	26.6998	26.0899	27.3283	26.6024	36.0372		26.2301										25.406								-0.449953				-1.27405				465.056	304.736	718.96	29.4404		335.843
UTP20	YBL004W	U3 small nucleolar RNA-associated protein 20	P35194	No	No	11.9	29.3497	29.5031	28.3368	29.2895	30.495	28.4739	28.7609	28.275	28.2929	16.3113	28.5056	28.3616			7.04769		28.7811		28.4353	16.8706	28.2491	28.8371	27.9757	31.6248	-0.669047	0.0590979	-0.686159	0.161178	-0.511557	0.281341	-0.765796	0.0990863	1063.69	1182.99	527.088	69.0908	579.671	707.256	505.01	511.322	592.513	536.261
UTP18	YJL069C	U3 small nucleolar RNA-associated protein 18	P40362	No	No	19.9	27.1384	27.5591	26.6359	27.2961	25.3241	26.1843	26.6088	26.4166	26.4227	11.8994	26.4136	25.9361	26.128	25.9254	16.5067	25.896	25.3043	26.0216	25.426	23.9735	26.1865	26.3337		7.20876	-0.749246	0.0125128	-1.05658	0.00336546	-1.49538	0.00123934	-0.897233	0.0383013	994.372	1331.06	701.91	75.1181	513.273	688.852	602.951	605.481	601.665	432.151	493.632
UTP15	YMR093W	U3 small nucleolar RNA-associated protein 15	Q04305	No	No	60.4	28.7793	28.7571	28.987	28.805	7.51896	27.9714	27.8624	27.6057	27.8382	10.3364	27.9464	27.5918	27.3673	27.5621	17.3514	28.1989	28.031	27.8464	27.9797	10.1847	28.1751	28.008	27.9327	8.71822	-1.01268	3.58922e-05	-1.21521	9.08187e-05	-0.818119	9.85788e-05	-0.793528	0.000256	3570.8	3516.31	4123.64	246.164	2039.69	1891.27	1582.96	1859.73	2004.58	1567.84	1341.84
UTP14	YML093W	U3 small nucleolar RNA-associated protein 14	Q04500	No	No	24	27.3463	27.247	27.7997	26.8945	26.4099	26.2994			26.2042	4.66446	26.711						26.8689					26.0306	25.4171	29.6262	-1.07004	0.0190189	-0.610906		-0.452953		-1.598	0.00901777	740.513	691.255	1013.97	36.6649	358.422			335.533	476.735
UTP13	YLR222C	U3 small nucleolar RNA-associated protein 13	Q05946	No	No	26.3	27.2641	27.6302	28.1226	26.9553	35.6744	27.4738	27.4577	27.1288	27.2693	11.187	26.4212	27.1029	26.5503	26.6363	22.0521	26.8223	27.5085	26.6133	27.2718	28.0867	26.6003	27.0785	26.9391	16.4359	-0.160647	0.565519	-0.815363	0.0313755	-0.439099	0.223971	-0.620422	0.110244	791.627	1020.3	1435.37	43.28	915.494	905.327	720.755	794.476	441.357	707.936	482.673
UTP11	YKL099C	U3 small nucleolar RNA-associated protein 11	P34247	No	No	30.4	25.5728	25.6334	25.2021	25.7305	15.0158	25.6039		25.2759	25.4236	11.4303	25.236	25.153	25.4426	25.4092	9.52547	25.7955		25.349		21.7108			25.6007		-0.100203	0.553929	-0.2245	0.14659	0.0375621	0.873124	0.0660376		750.414	782.621	580.403	56.6913	766.788		610.866	676.723	594.191	560.961	685.654
UTP10	YJL109C	U3 small nucleolar RNA-associated protein 10	P42945	No	No	17.8	31.9957	32.8298	32.0267	32.6922	29.8172	31.6879	31.6702	31.8131	31.6454	5.2869	32.0274	31.8698	32.0528	32.4732	18.9425	31.6645	32.0882	31.7269	31.5254	17.459	31.8942	31.846	31.889	1.82699	-0.681948	0.0217081	-0.280295	0.311402	-0.634844	0.0435962	-0.509692	0.105879	9568.9	17059.2	9776.49	1050.15	7730.29	7636.22	8431.06	7506.16	9781.63	8768.92	9955.26
UTH1	YKR042W	Probable secreted beta-glucosidase UTH1	P36135	No	Yes	16.2		28.6942		28.587	5.25296	28.3789	28.8726	28.7514	28.3247	18.7745	28.9748	29.1825	28.7863	28.7771	13.6302	29.1998	28.9148	28.8685	29.0434	10.4899	28.149	29.1786	28.8303	33.7706	-0.0587224	0.789782	0.289568	0.120563	0.366021	0.0344685	0.0787069	0.853841		5254.67		330.37	4222.92	5946.45	5467	4067.22	6382.96	7371.15	5600.92
USO1	YDL058W	Intracellular protein transport protein USO1	P25386	No	No	27.7	27.8075	28.5348	28.456	28.1953	21.313	28.1386	27.875	27.9763	28.1712	9.54806	28.1784	28.2712	28.0778	28.0278	7.55542	28.0768	28.0043	28.1955	28.3576	10.8772	28.1985	28.6565	28.1434	20.4386	-0.208098	0.286907	-0.109623	0.548793	-0.0898571	0.637529	0.0843981	0.736178	508.706	842.213	797.406	45.0765	639.965	533.091	571.878	654.561	657.831	701.555	613.523
USE1	YGL098W	Protein transport protein USE1	P53146	No	No	18.8
USA1	YML029W	U1 SNP1-associating protein 1	Q03714	No	No	18						26.8338	27.1537	26.9292	27.3962	17.7842	26.8445	26.9895	27.5179	27.0992	21.244	27.373	27.0628	26.8941	27.5936	21.7196	26.6565	27.2391	26.8464	21.1489													553.293	690.68	591.133	817.103	557.41	616.343	888.989
URK1	YNR012W	Uridine kinase	P27515	No	No	7.2	25.3925	25.4261	25.8193		17.1303																												349.805	358.048	470.221
URH1	YDR400W	Uridine nucleosidase	Q04179	No	No	15.9							25.8958	25.9845	25.8775	4.00719			26.1886	25.8146	18.2304	25.8155		25.9702		7.5772	25.822	26.0913	25.7002	14.1641														735.314	781.955	726.045			900.819
URE2	YNL229C	Transcriptional regulator URE2	P23202	No	No	28.8	27.4444		27.1222	27.4618	12.7192	26.4481	27.1164	27.1518	26.458	26.7939	26.7941	26.6535	27.5535	27.2549	29.0524	26.1657	27.2061	27.2783	27.0904	29.8299	26.893	26.7027	26.6865	8.12967	-0.549214	0.079815	-0.278786	0.336767	-0.407639	0.259359	-0.582104	0.0106615	2027.74		1621.84	138.986	1016.44	1615.4	1655.48	1023.46	1291.99	1171.97	2186.95
URB2	YJR041C	Nucleolar pre-ribosomal-associated protein 2	P47108	No	No	6.8	31.5292	30.3731	30.601	30.4253	42.9901	29.8101	30.0975	30.18	30.4768	19.0262		29.3636	30.7291	31.3527	59.0703			31.2069	31.4123	10.0517		28.9351	29.6207	32.988	-0.59107	0.0989177	-0.250336	0.687129	0.577439	0.231839	-1.45426	0.0333219	10254.8	4601.31	5388.82	323.108	3114.6	3801.23	4024.9	4944.44		2285.57	5889.45
URB1	YKL014C	Nucleolar pre-ribosomal-associated protein 1	P34241	No	No	13.2	28.9803	29.6531	29.8665	29.3358	25.8274	28.9488	28.0472	28.8818	28.6776	25.2138	28.005	28.4586	28.1892	28.2144	13.1003	28.0793	28.6432	28.0793	27.7441	27.2195	28.9652	28.3772	28.9302	21.2096	-0.82007	0.0270682	-1.24214	0.00116102	-1.32245	0.00264458	-0.70137	0.053384	1164.8	1856.84	2152.88	100.923	1139.6	610.047	1087.93	944.334	592.43	811.315	673.148
URA8	YJR103W	CTP synthase 2	P38627	No	No	55.7	29.8686	29.1429	29.5319	29.1143	25.6262	29.6713	29.8133	29.7256	29.7474	4.08332	29.9537	30.0415	29.9071	30.0499	4.78114	29.8904	30.1188	30.1435	30.1087	7.82893	30.0831	30.2514	29.8953	12.2819	0.324994	0.123134	0.57361	0.0198519	0.650902	0.0135119	0.662138	0.0338542	6793.87	4108.19	5379.82	272.768	5925.68	6538.55	6152.72	6246.56	7206.45	7659.02	6977.74
URA7	YBL039C	CTP synthase 1	P28274	No	No	64.6	31.5227	31.7002	31.6903	31.5867	5.87229	30.9214	31.1441	31.1877	31.2143	8.87794	30.9486	30.8118	31.009	30.9891	6.0101	30.7711	30.9152	30.7516	30.8642	5.38308	30.6349	30.749	30.6203	4.94903	-0.508129	0.00067769	-0.685394	3.14193e-05	-0.799492	8.71016e-06	-0.956919	1.89758e-05	21316.2	24106.9	23942.4	1509.1	14050.5	16396.2	16898.5	17213.6	14317.9	13022.5	14930.1
URA6	YKL024C	Uridylate kinase	P15700	No	No	75.5	29.0951	29.3073	28.6442	29.0814	18.2127	29.34	29.4535	29.2297	29.4611	7.45473	29.4143	29.237	29.462	29.5705	9.46494	29.5299	29.4206	29.3956	29.5156	4.65415	29.403	29.1615	29.1702	9.73944	0.339061	0.0639126	0.388954	0.0465291	0.433426	0.0232035	0.212916	0.284086	11179.8	12951	8179.21	749.981	13247.9	14332.2	12273.5	14408.1	13948.2	12335.7	14417.4
URA5	YML106W	Orotate phosphoribosyltransferase 1	P13298	No	No	65.5	30.1369	30.7442	29.7597	30.5115	28.8103	29.75	30.2569	30.3126	30.263	16.6944	29.5745	29.4093	29.1761	29.3718	11.2461	29.6291	29.6979	29.8732	29.9224	9.63582	29.8672	30.3383	30.0917	16.3419	-0.142459	0.594374	-0.905153	0.00781747	-0.507428	0.0668061	-0.189027	0.529319	21401.2	32603.9	16477.4	1879.14	16367.2	23257.4	24172.9	23357.1	14492.5	12924.5	10995.5
URA2	YJL130C	Protein URA2;Glutamine-dependent carbamoyl-phosphate synthase;Aspartate carbamoyltransferase	P07259	No	No	79.4	35.023	34.8908	34.932	34.84	5.41883	34.715	35.0314	34.8986	34.8991	8.89211	35.2657	35.1417	35.2573	35.228	3.86906	35.7763	35.7997	35.8213	35.8334	1.73747	36.0414	36.2164	36.0645	6.6999	-0.0354493	0.656028	0.301717	0.000754755	0.886198	6.15094e-07	1.18597	9.00495e-06	63701.4	58123.7	59804.1	3799.87	51453	64071.8	58435.7	58455.8	75369.6	69160.5	74933.5
URA10	YMR271C	Orotate phosphoribosyltransferase 2	P30402	No	Yes	24.7											25.8635	25.9136	25.6969		7.71752	26.6244	26.3202	26.3435	26.4961	9.99485	26.4541	26.4827	26.4075	2.62105																	1100.18	1139.04	980.165
URA1	YKL216W	Dihydroorotate dehydrogenase (fumarate)	P28272	No	No	68.5	32.2407	32.381	32.1824	32.1997	6.3965	31.3142	31.6475	31.4925	31.6456	10.6552	31.1726	31.1722	31.3006	31.1198	5.42942	30.5444	30.5372	30.9111	30.9356	15.2408	30.6708	30.9103	30.677	9.70595	-0.726009	0.00020674	-1.05966	1.96222e-06	-1.51888	1.44496e-05	-1.49828	1.06475e-05	65198	71855.4	62613.2	4291.66	34301.9	43217.8	38813.8	43160	31095.3	31087.6	33979.5
UPF3	YGR072W	Nonsense-mediated mRNA decay protein 3	P48412	No	No	27.6	27.0356	26.0456	26.7988	26.5029	27.9816	26.9804	25.6065	25.857	25.6012	53.3217	26.4594	26.5764	27.1269	26.795	21.1087	27.4761	27.2562	27.3036	26.6553	22.3379	26.6698	26.8069	27.3364	25.5725	-0.584451	0.186265	0.143693	0.598913	0.577052	0.0835421	0.341933	0.312209	1369.13	689.351	1161.92	64.0938	1317.77	508.459	604.867	506.569	918.302	995.92	1458.6
UNG1	YML021C	Uracil-DNA glycosylase	P12887	No	No	13.1	28.6684																																4712.99
UMP1	YBR173C	Proteasome maturation factor UMP1	P38293	No	No	43.2																					25.3762	25.4045		1.38907
UME1	YPL139C	Transcriptional regulatory protein UME1	Q03010	No	No	40	26.4959	26.9313	26.8791	26.8028	12.7734	26.6757	26.6675	26.7439	26.7335	2.71174	26.7701	27.1139	26.534	26.7442	17.1741	27.1549	26.7548	27.0057	26.7024	14.9032	26.7238	26.5833	26.6051	5.30833	-0.0721149	0.495414	0.0132739	0.934376	0.127171	0.412307	-0.13987	0.299724	829.281	1121.48	1081.61	69.475	939.387	934.042	984.867	977.769	1002.92	1272.73	851.504
ULP1	YPL020C	Ubiquitin-like-specific protease 1	Q02724	No	No	12.6									24.3411													24.2362																		131.28
UIP4	YPL186C	ULP1-interacting protein 4	Q08926	No	No	9.5						26.0835	25.9734	26.0187		3.84852	26.5393			26.7623	10.9078	26.1272																					929.032	860.755	888.23		1274.19
UIP3	YAR027W	ULP1-interacting protein 3	P39547	No	No	9.4				25.9307																																71.4203
UGP1	YKL035W	UTP--glucose-1-phosphate uridylyltransferase	P32861	No	No	77.8	31.8694	32.1028	31.7371	31.8496	10.9503	32.7445	32.927	32.8642	32.9787	6.88975	32.6687	32.66	32.6945	32.6714	1.02481	32.2583	32.3158	32.4371	32.4376	6.19167	32.1366	32.3127	32.1794	6.45153	0.988873	3.8015e-05	0.783941	5.27679e-05	0.472468	0.00181029	0.319813	0.0249959	31329.4	36831.5	28583.9	2092.88	57462.5	65211.8	62434.4	67591.6	54521.4	54194.8	55506.8
UGO1	YDR470C	Mitochondrial fusion and transport protein UGO1	Q03327	No	No	11.2																						24.172
UGA2	YBR006W	Succinate-semialdehyde dehydrogenase [NADP(+)]	P38067	No	No	27.4	26.5797	27.1908	26.4529		28.8808	27.3466	27.5153	26.3288	27.3919	31.1211	28.2887	28.2285	28.3467	28.3084	3.39913	28.5111	28.0674	28.2327	28.3381	12.9127	28.4284	28.1858	28.4165	9.20915	0.404508	0.331955	1.55191	0.000478994	1.54616	0.000902534	1.60239	0.00266049	827.539	1264	757.896		1408.14	1582.8	695.438	1453.02	2705.47	2594.91	2816.36
UGA1	YGR019W	4-aminobutyrate aminotransferase	P17649	No	No	71.3	28.9224	29.6784	29.0556	29.5655	25.3873	30.5867	30.6703	30.4928	30.5016	5.8298	30.9368	30.6364	30.6557	30.6756	10.2515	30.6565	30.7207	30.5997	30.7777	5.35355	30.581	30.7871	30.6132	7.82938	1.25736	0.000585628	1.42066	0.000381874	1.38316	0.000343324	1.35496	0.00187752	4296.06	7255.21	4711.77	454.364	13617.3	14428.8	12758.6	12837.1	17357.3	14094.4	14284.4
UFE1	YOR075W	Syntaxin UFE1	P41834	No	No	2.9												23.5729																														137.617
UFD4	YKL010C	Ubiquitin fusion degradation protein 4	P33202	No	No	12.1	27.099	28.1192	28.8036	28.0103	45.5358	28.6131	28.8241	28.8458	28.9284	9.01831		29.2574	29.5871	29.1662	15.8421	29.7674	29.2185	29.3279	29.1197	21.1733	29.1771	29.5698	28.7035	29.3269	0.794846	0.0673462	1.32887	0.0266938	1.35033	0.0117777	1.14213	0.0572455	382.923	776.634	1248.1	48.7729	1093.71	1266	1285.13	1360.91		1709.42	2148.39
UFD2	YDL190C	E4 ubiquitin-protein ligase UFD2	P54860	No	No	25	26.1906	27.3367	27.0299	27.7001	39.4916	27.1228	27.857	27.6253	27.6026	20.0447	27.3552	26.824	27.5832	27.2254	21.1084	27.3806	27.5322	27.8165	27.4606	13.7284	26.9371	27.9075	27.2579	35.4903	0.487585	0.220818	0.182605	0.629212	0.483114	0.19997	0.303175	0.52993	311.546	689.495	557.413	60.0691	594.471	988.887	842.161	829.062	698.404	483.257	817.957
UFD1	YGR048W	Ubiquitin fusion degradation protein 1	P53044	No	No	36.3	27.8427	27.9877		27.7836	7.37607	28.3891	28.1124	28.0349	27.8705	15.3932	28.0934	27.7844	27.7992	28.0508	11.2699	28.4617	28.2362	28.5631	27.8489	20.6242	28.3924	28.2693	28.3676	4.46054	0.230385	0.155334	0.0606433	0.601583	0.406186	0.0906062	0.471781	0.00271149	2703.23	2989.16		175.722	3947.93	3258.92	3088.44	2755.9	3216.25	2596.31	2623.04
UBX7	YBR273C	UBX domain-containing protein 7	P38349	No	No	28.7	26.2986	26.3634	25.972	25.8862	16.2404	26.774		25.9324	26.894	32.1625		25.7415				26.6256	26.8247	26.7447	26.6299	6.73392	26.7547	26.3719	26.561	13.2484	0.403461	0.221652	-0.38854		0.576197	0.0040239	0.432471	0.0493446	737.611	771.507	588.193	37.5335	1025.55		572.286	1114.47		501.339
UBX5	YDR330W	UBX domain-containing protein 5	Q06682	No	No	21.4	25.8353		26.0912	25.531	19.1851		26.449	26.5232	26.6238	6.10532						26.1144									0.712847	0.0136702			0.29529				471.767		563.328	25.875		721.918	759.995	814.897
UBX4	YMR067C	UBX domain-containing protein 4	P54730	No	No	36.5	31.0006	29.9837	30.8717	30.0116	36.6547	30.4872	30.4669	30.2774	30.1978	9.78255	30.6733	30.4965	30.8403	30.2233	17.8114	30.8261	30.3637	30.2462	30.4096	18.6493	30.2093	30.351	30.0779	9.47394	-0.109563	0.710453	0.0914379	0.772661	-0.0055087	0.985952	-0.254163	0.474484	20452.6	10107.3	18703.8	697.838	14328.4	14128.5	12389.2	11723.8	16301	14420.8	18301.1
UBX3	YDL091C	UBX domain-containing protein 3	Q12229	No	No	9.7																					24.2	23.8489	24.678	29.1499
UBX2	YML013W	UBX domain-containing protein 2	Q04228	No	No	21.1	24.9116			25.5974	32.993	26.1293	25.982	25.8776	25.8883	8.26101	26.6509	25.9599	25.9798	26.2366	23.6708	26.4675	25.7925	26.3878	26.459	20.022	26.136	26.1505	26.4496	12.6675	0.714768	0.0347531	0.952292	0.0408582	1.02217	0.0335856	0.990848	0.0410862	211.365			23.0253	491.562	443.846	412.886	415.946	705.666	437.122	443.183
UBP6	YFR010W	Ubiquitin carboxyl-terminal hydrolase 6	P43593	No	No	55.7	29.6223	29.7592	29.769	29.6358	5.42049	30.027	30.0449	30.1925	29.9038	8.24803	30.278	30.4044	30.1874	30.1663	7.64582	30.2975	30.2001	30.126	30.1529	5.30152	30.2059	30.1642	30.3299	6.04546	0.3455	0.00278905	0.562454	0.000153368	0.497557	9.55403e-05	0.536802	0.000346465	6469.59	7113.73	7162.04	442.262	8564.54	8671.79	9605.75	7863.88	10192.1	11125.3	9572.09
UBP3	YER151C	Ubiquitin carboxyl-terminal hydrolase 3	Q01477	No	No	39.8	29.322	29.009	28.6943	28.9446	18.1555	28.7449	28.8309	28.8725	28.7337	4.67629	28.6609	28.4734	28.2533	28.8928	18.8437	28.4963	28.6462	28.6083	27.8463	22.7879	28.503	28.3576	28.24	9.16669	-0.196974	0.190336	-0.422365	0.0652721	-0.593229	0.0401231	-0.625641	0.0128873	2944.01	2369.88	1905.37	153.486	1973.41	2094.66	2155.94	1958.1	1861.77	1634.93	1403.57
UBP2	YOR124C	Ubiquitin carboxyl-terminal hydrolase 2	Q01476	No	No	29.6	27.4799	27.8939	27.6596	27.3108	17.5044	27.7667	28.477	28.3204	28.2039	19.7321		27.6716	28.193	27.8516	18.7594	27.3848	27.4727	27.7316	27.3546	12.3954	27.9081	27.6843	28.0619	12.9748	0.605936	0.0218092	0.319345	0.163275	-0.100127	0.533124	0.298719	0.146578	571.828	761.939	647.713	34.443	697.601	1141.43	1023.96	944.534		653.09	937.446
UBP15	YMR304W	Ubiquitin carboxyl-terminal hydrolase 15	P50101	No	No	22.3	27.198	27.1987	27.6357	26.7343	25.2867	27.4012	27.7677	27.4147	27.4583	12.6657	28.0048	27.1792	27.79	27.4386	24.9736	27.8561	27.836	27.9342	27.9896	4.94955	27.7988	28.6613	28.2913	29.0465	0.318807	0.168057	0.411474	0.164223	0.712311	0.00896492	1.05879	0.0171395	479.483	479.732	649.432	23.5461	552.016	711.657	557.217	574.283	838.784	473.286	722.744
UBP12	YJL197W	Ubiquitin carboxyl-terminal hydrolase 12	P39538	No	No	4.1
UBC9	YDL064W	SUMO-conjugating enzyme UBC9	P50623	No	No	34.4	26.8926	27.1452	27.0591		8.77302	26.6303	27.1149	26.9554	26.8269	14.0621	26.6595		26.9763	27.024	13.186		26.678	26.7061	26.9564	10.9149		26.4503	26.5035	2.60614	-0.150444	0.319573	-0.14571	0.345306	-0.252145	0.0942881	-0.555377	0.0108026	3110.01	3705.11	3490.43		2593.05	3627.97	3248.3	2971.47	2645.97		3295.73
UBC8	YEL012W	Ubiquitin-conjugating enzyme E2-24 kDa	P28263	No	No	22.9			25.754																																1027.1
UBC7	YMR022W	Ubiquitin-conjugating enzyme E2 7	Q02159	No	No	25.5	26.3182		26.1295	25.7791	18.3686	26.1667	26.4095	26.558	26.2745	11.82	26.8469	26.3736	26.5315	26.4501	15.1245	26.208	26.4949	26.3301	26.1058	11.7448	25.9219	26.4084	26.5496	21.4735	0.27657	0.156274	0.474892	0.0464709	0.209071	0.261352	0.217665	0.428252	2019.94		1772.27	94.1408	1818.58	2151.85	2385.19	1959.63	2913.84	2099	2341.69
UBC6	YER100W	Ubiquitin-conjugating enzyme E2 6	P33296	No	No	49.2	24.8617		25.2604		19.4182	26.0239			26.5154	23.8637								25.5414	25.1798	17.6319	26.0108				1.20857	0.0622373			0.299483	0.381631	0.94975		480.252		633.127		1074.74			1511.07
UBC5	YDR059C	Ubiquitin-conjugating enzyme E2-16 kDa	P15732	No	No	19.6																						25.0508
UBC4	YBR082C	Ubiquitin-conjugating enzyme E2 4	P15731	No	No	31.8	28.8679	29.4126	29.3003	29.2924	15.4559	29.4257	29.418	29.4226	29.2972	4.24118	28.477	28.7637	28.541	28.5693	8.81318	28.5873	29.0531	28.9094	28.8495	13.0978	28.7745	29.8689	28.8725	45.3773	0.172596	0.213352	-0.630555	0.00342208	-0.368478	0.0544257	-0.0463488	0.892213	13309.8	19415.8	17961.7	1209.77	19593.2	19488.9	19550.9	17923.2	10150.6	12382.6	10611.7
UBC13	YDR092W	Ubiquitin-conjugating enzyme E2 13	P52490	No	No	34	27.54	28.0193	27.4582	28.2657	26.9449	28.23	28.7583	28.3558	28.5015	16.1357	28.8212	28.3387	28.9566	28.7553	17.2409	28.9011	28.6486	28.8907	28.8754	8.02009	28.6936	28.9473	28.967	10.2338	0.640577	0.0288153	0.897132	0.00872056	1.00814	0.00249673	1.0485	0.00724412	4994.87	6963.13	4719.47	559.39	8057.83	11621.4	8792.15	9726.62	12139.2	8688.75	13334
UBC1	YDR177W	Ubiquitin-conjugating enzyme E2 1	P21734	No	No	90.7	28.2891	27.9576	27.9006	27.9058	13.6303	28.0373	28.6335	28.239	28.2879	17.7522	28.37	27.8816	28.5201	28.467	18.4237	28.233	28.0869	28.3373	28.2906	7.37227	27.6158	28.024	27.962	14.584	0.286163	0.113982	0.296402	0.137569	0.223682	0.0828606	-0.146012	0.38325	6065.3	4820.06	4633.48	314.906	5093.93	7700.34	5858.38	6060.31	6415.16	4572.83	7118.41
UBA1	YKL210W	Ubiquitin-activating enzyme E1 1	P22515	No	No	64.6	32.7816	32.7841	33.2038	32.6317	18.0985	32.9167	33.0719	32.9307	32.9395	5.11389	32.9649	32.8509	32.9701	32.9199	3.78332	32.859	32.9227	32.8451	32.9548	3.6169	32.8791	32.8157	32.8356	2.2567	0.114389	0.406872	0.0761203	0.568373	0.0450924	0.732348	-0.00686827	0.964423	28890.1	28941	38713.2	1763.46	31725.8	35330.1	32036.1	32232.6	32804.2	30310.9	32922.8
TYW3	YGL050W	tRNA wybutosine-synthesizing protein 3	P53177	No	No	22.3	26.4025	26.3326	25.4959	26.3447	25.5103	25.5776	25.7753			9.67014	25.9732					25.8218			25.8139	0.383742	25.4134	25.6706	25.9902	20.1409	-0.467475	0.230033	-0.170695		-0.326065	0.372275	-0.45254	0.181609	1287.37	1226.51	686.736	83.7613	726.778	833.465			956.058
TYW1	YPL207W	S-adenosyl-L-methionine-dependent tRNA 4-demethylwyosine synthase	Q08960	No	No	12.6			24.4974																																117.912
TYS1	YGR185C	Tyrosine--tRNA ligase, cytoplasmic	P36421	No	No	72.1	32.2879	32.2115	32.4804	32.0426	12.6468	31.7572	32.0722	32.0314	31.8909	9.76932	32.0391	31.7997	31.952	31.8106	8.08128	31.9117	31.9843	31.9351	32.1529	7.76725	31.9327	32.0218	31.959	3.19074	-0.317677	0.0334554	-0.355249	0.0164007	-0.259597	0.0496401	-0.284403	0.0486472	53256.4	50510	60861.8	3042.83	36865.3	45863.2	44582.4	40445.6	44823.2	37967.3	42195.6
TYR1	YBR166C	Prephenate dehydrogenase [NADP(+)]	P20049	No	No	23.5	27.0799	27.3192	26.8153	27.1467	14.1575	27.0338	26.944	26.895		4.90959	26.6765	26.7641	26.5457		7.55493	26.9051	27.2232	26.9483	26.6891	15.4192	27.9447	27.3118	27.0278	33.822	-0.132631	0.348776	-0.42814	0.0245543	-0.148854	0.363981	0.33785	0.247795	1245.5	1470.18	1036.81	88.3443	1206.35	1133.56	1095.72		941.722	1000.63	860.096
TY2B-DR2;TY2B-C;TY2B-OR1;TY2B-OR2	TY2B-DR2;TY2B-C;TY2B-OR1;TY2B-OR2	Transposon Ty2-DR2 Gag-Pol polyprotein;Capsid protein;Ty2 protease;Integrase;Reverse transcriptase/ribonuclease H;Transposon Ty2-C Gag-Pol polyprotein;Capsid protein;Ty2 protease;Integrase;Reverse transcriptase/ribonuclease H;Transposon Ty2-OR1 Gag-Pol polyprotein;Capsid protein;Ty2 protease;Integrase;Reverse transcriptase/ribonuclease H;Transposon Ty2-OR2 Gag-Pol polyprotein;Capsid protein;Ty2 p…	Q03494	No	No	1.4																						25.2062
TY2A-LR1;TY2A-DR1	TY2A-LR1;TY2A-DR1	Transposon Ty2-LR1 Gag polyprotein;Capsid protein;Gag-p4;Transposon Ty2-DR1 Gag polyprotein;Capsid protein;Gag-p4	P0C2J4	No	No	0						26.9			27.0791	8.76568	26.558																										1124.94			1273.61	887.505
TY1B-PL;TY1B-LR2;TY1B-DR6	TY1B-PL;TY1B-LR2;TY1B-DR6	Transposon Ty1-PL Gag-Pol polyprotein;Capsid protein;Ty1 protease;Integrase;Reverse transcriptase/ribonuclease H;Transposon Ty1-LR2 Gag-Pol polyprotein;Capsid protein;Ty1 protease;Integrase;Reverse transcriptase/ribonuclease H;Transposon Ty1-DR6 Gag-Pol polyprotein;Capsid protein;Ty1 protease;Integrase;Reverse transcriptase/ribonuclease H	Q12414	No	No	0																						28.9858	29.0805	4.64033
TY1B-LR4	TY1B-LR4	Transposon Ty1-LR4 Gag-Pol polyprotein;Capsid protein;Ty1 protease;Integrase;Reverse transcriptase/ribonuclease H	P0C2I7	No	No	0																					26.8096
TY1A-PR1;TY1A-A;TY1A-DR4	TY1A-PR1;TY1A-A;TY1A-DR4	Transposon Ty1-PR1 Gag polyprotein;Capsid protein;Gag-p4;Transposon Ty1-A Gag polyprotein;Capsid protein;Gag-p4;Transposon Ty1-DR4 Gag polyprotein;Capsid protein;Gag-p4	P0CX58	No	No	0	28.9564	29.6135	28.4356	29.0192	33.8744	29.5993	29.1812	28.8734	30.0282	35.1399	29.4157	29.4938	29.4143	29.549	4.56133	29.2233	29.5101	29.6908	29.4879	13.0587	29.1982	28.9165	29.2171	11.2582	0.414349	0.278975	0.462027	0.106209	0.47185	0.118933	0.104423	0.739077	4745.73	7483.49	3307.83	335.707	7410.6	5545.94	4480.6	9975.61	6525.1	6887.63	6518.72
TY1A-PL;TY1A-LR2;TY1A-ER1;TY1A-DR6	TY1A-PL;TY1A-LR2;TY1A-ER1;TY1A-DR6	Transposon Ty1-PL Gag polyprotein;Capsid protein;Gag-p4;Transposon Ty1-LR2 Gag polyprotein;Capsid protein;Gag-p4;Transposon Ty1-ER1 Gag polyprotein;Capsid protein;Gag-p4;Transposon Ty1-DR6 Gag polyprotein;Capsid protein;Gag-p4	P0CX73	No	No	0	29.5661		28.0026	28.3777	60.1964	28.5828	29.0609	28.8129	28.8022	13.6379	27.9707		28.7961	29.0133	34.0283	27.6327	28.5182	28.9318	27.9367	40.0986	28.4592	28.0968	27.3478	36.1385	0.165891	0.703102	-0.055437	0.926982	-0.393951	0.485586	-0.680857	0.301018	7259.65		2456.08	215.715	3671.88	5114.83	4306.82	4275.13	2402.38		4257.04
TY1A-NL1	TY1A-NL1	Transposon Ty1-NL1 Gag polyprotein;Capsid protein;Gag-p4	Q12391	No	No	0								23.5842				24.629	24.8708	24.83	8.75678		24.0656	24.1493		4.10206																			114.031			235.253	278.187
TY1A-MR1;TY1A-BL	TY1A-MR1;TY1A-BL	Transposon Ty1-MR1 Gag polyprotein;Capsid protein;Gag-p4;Transposon Ty1-BL Gag polyprotein;Capsid protein;Gag-p4	Q04215	No	No	2.7				25.568																																30.5672
TWF1	YGR080W	Twinfilin-1	P53250	No	No	55.4	28.0049	27.3944	27.4265	27.3455	23.5754	27.8266	28.0322	28.1225	28.2651	12.5291	28.2823	28.2484	28.3336	27.6349	20.2193	28.1184	28.292	28.0109	27.735	15.7672	28.7562	28.798	27.9988	28.0118	0.518807	0.0280259	0.581989	0.0418903	0.496248	0.0430037	0.974856	0.0186476	3248.46	2127.77	2175.65	139.287	2870.95	3310.69	3524.53	3890.69	3937.37	3845.83	4079.81
TVP18	YMR071C	Golgi apparatus membrane protein TVP18	Q04767	No	No	26.3		26.5215	26.2357	26.463	10.1835		27.4418	27.4822	27.917	19.0863	26.795			26.8901	4.65708	27.5979	27.8119	27.4051	27.9964	17.699	27.9484	28.4769	28.36	18.2896	1.20699	0.00233243	0.435838	0.0344013	1.29615	0.000591941	1.85506	0.000526955		2303.95	1889.95	149.829		4360.44	4484.33	6061.47	2784.98
TUP1	YCR084C	General transcriptional corepressor TUP1	P16649	No	No	52.6	30.3212	30.8061	30.5193	30.6991	14.449	30.5268	30.5896	30.6571	30.5709	3.775	30.6802	30.6511	30.7813	30.6892	3.95771	30.5358	30.5444	30.4718	30.6283	4.47502	31.0758	30.7317	30.6169	17.0709	-0.000320951	0.997762	0.11402	0.340051	-0.0413672	0.722481	0.221713	0.250754	7659.3	10719	8786.92	674.029	8832.6	9225.41	9667.33	9106.66	9823.2	9627.36	10536.3
TUM1	YOR251C	Thiosulfate sulfurtransferase TUM1	Q08686	No	No	85.5	29.1223	28.9909	29.5172	29.0541	17.5165	28.88	29.0015	28.9187	29.2498	11.9933	29.3921	29.1501	29.1343	29.0614	10.3395	29.384	29.0612	29.1674	29.2608	9.54107	29.3727	29.3756	29.3439	1.21238	-0.158628	0.314914	0.0133607	0.92631	0.0472238	0.741876	0.192947	0.227748	7635.31	6970.27	10039.1	493.21	6454.57	7022.01	6630.17	8340.86	9205.55	7783.61	7699.07
TUF1	YOR187W	Elongation factor Tu, mitochondrial	P02992	No	No	61.6	30.9746	30.6798	30.8805	30.832	8.4119	30.9105	31.1009	31.0307	31.0621	5.59162	31.0186	30.8992	31.1021	31.0124	5.72999	30.7584	30.9786	30.8986	30.8372	6.46802	30.8668	31.1397	30.8439	11.748	0.184307	0.0471755	0.16636	0.0665309	0.0264898	0.743366	0.108401	0.360875	19665	16030.2	18423.6	1206.41	18810.3	21463.7	20444.1	20894.3	20273.6	18664	21482.4
TUB4	YLR212C	Tubulin gamma chain	P53378	No	No	24.1						25.7152											25.6342				26.337	26.0552	26.3522	11.1845													468.001
TUB3	YML124C	Tubulin alpha-3 chain	P09734	No	No	39.1	28.8042	29.073	28.8264	28.5241	15.4132	28.4639	28.976	28.9177	28.9737	15.706	29.1423	28.8043	29.3393	29.1086	14.8933	28.989	28.7915	28.9596	29.253	13.5338	28.7242	28.9992	28.9578	9.98461	0.0259005	0.881862	0.291712	0.113465	0.191361	0.2416	0.0867937	0.590052	4217.22	5081.03	4282.63	235.211	3331.09	4750.66	4562.53	4743.01	5331.16	4217.67	6111.03
TUB2	YFL037W	Tubulin beta chain	P02557	No	No	50.8	31.4725	31.3444	31.672	31.2316	13.3159	31.4763	31.7349	31.6947	31.6159	7.73983	31.6794	31.6403	31.6573	31.7616	3.779	31.3444	31.5793	31.6095	31.5468	8.00508	31.7057	31.7051	31.4841	8.61614	0.200286	0.11937	0.25451	0.0411226	0.0898403	0.452516	0.201492	0.175308	26160.8	23938.6	30041.6	1499.29	26230.2	31378.8	30516.6	28894.9	30195.2	29387.5	29736
TUB1	YML085C	Tubulin alpha-1 chain	P09733	No	No	40.3	31.0753	30.6825	30.969	30.5666	16.4148	30.889	31.1061	30.9699	30.9186	6.80834	31.2552	31.2089	31.2143	31.1136	4.10141	30.9224	30.9468	30.9903	31.3157	13.4431	30.6963	31.0398	30.8709	11.8748	0.147594	0.294465	0.37468	0.0225452	0.220461	0.192985	0.0456525	0.791403	20312.7	15471.7	18869.9	966.859	17852.7	20751.7	18882.5	18222.6	23011.4	22284.2	22367.7
TSR4	YOL022C	20S rRNA accumulation protein 4	P25040	No	No	37	26.8617	26.6595	26.4732	26.7869	11.5022	26.2302	26.6966	26.1561	26.7777	21.7566	25.8972	25.9211	26.9456	26.8292	38.0088	26.2625	26.3851	26.354	26.7275	14.8829	26.6216	26.3218	26.2417	14.2921	-0.230188	0.248101	-0.297075	0.354155	-0.263045	0.0945737	-0.300309	0.0840079	1185.47	1030.42	905.6	76.2274	765.24	1057.25	726.901	1118.39	607.499	617.628	1256.43
TSR3	YOR006C	Ribosome biogenesis protein TSR3	Q12094	No	No	11.5																						25.1625
TSR1	YDL060W	Ribosome biogenesis protein TSR1	Q07381	No	No	30.1	27.3141	27.5373	27.7067	27.1884	16.0561	26.9387	26.7176	26.768	26.6406	8.94372		26.9591		26.7925	8.15705	26.8657	26.7537			5.49011	27.3289	26.3255	26.7239	35.636	-0.670424	0.00222706	-0.560805	0.0359205	-0.626946	0.0237154	-0.643894	0.0695352	822.147	959.706	1079.23	51.03	633.744	543.73	563.043	515.449		642.809
TSL1	YML100W	Trehalose synthase complex regulatory subunit TSL1	P38427	No	No	52.7	31.1117	31.285	31.3462	31.1703	7.38391	33.0139	33.0754	32.9475	33.0075	3.62451	32.8083	32.8078	32.8555	32.7992	1.78665	32.476	32.7034	32.7425	32.6765	7.94953	32.5431	32.5808	32.4886	3.20515	1.78277	9.03475e-08	1.58941	1.11325e-07	1.4213	2.01725e-06	1.30919	6.43976e-06	8432.71	9509.2	9921.33	594.786	31520.5	32893.1	30103.1	31380.9	27334.8	27323.9	28244.1
TSC13	YDL015C	Very-long-chain enoyl-CoA reductase	Q99190	No	No	10	26.9765	27.481	27.2232	26.4193	29.1463	27.5619	27.2877	27.2598	27.5928	12.1652	27.8718	27.5123	27.6137	27.6968	10.7125	27.621	28.134	27.9381	28.1519	16.1673	28.3277	28.2451	28.3945	5.1698	0.40055	0.150609	0.648643	0.0349651	0.936252	0.0109872	1.29745	0.00490765	1605.75	2277.97	1905.26	73.9035	2409.3	1992.33	1954.14	2461.59	2986.67	2327.95	2497.34
TSC10	YBR265W	3-ketodihydrosphingosine reductase TSC10	P38342	No	No	23.8							24.9973						25.5084	25.226	13.7951	25.1153	25.2693	24.91	25.3983	14.3027	24.8825	25.3289		21.7098														416.258					593.221
TSA1	YML028W	Peroxiredoxin TSA1	P34760	No	Yes	85.7	34.1943	34.2274	34.2818	34.0693	6.14367	34.2173	34.6092	34.5268	34.3728	11.8173	34.9649	34.6853	34.9645	34.7524	9.95257	34.7276	34.702	34.8288	34.7865	3.98166	34.7026	34.8577	34.7741	5.38948	0.238321	0.0503732	0.648592	0.00026745	0.56804	4.07124e-05	0.58494	0.000286842	407063	416527	432535	25279.9	413628	542709	512577	460679	694488	572116	694260
TRX3	YCR083W	Thioredoxin-3, mitochondrial	P25372	No	No	27.6	26.3961	26.2133		25.893	17.1801	26.9757	26.9671	27.0262	27.0259	2.19992	27.4953		27.3129	27.2695	8.46564	27.7846	27.7153	27.6676	27.9778	9.73683	27.5284	27.2068	27.6577	15.5441	0.831273	0.00113677	1.19181	0.00184011	1.61886	0.000107892	1.29679	0.00286185	2735.91	2410.26		130.726	4088.65	4064.18	4234.26	4233.33	5861.29		5165.19
TRX2	YGR209C	Thioredoxin-2	P22803	No	No	85.6	31.7014	31.281	31.9293	31.6024	18.1953	32.0091	32.2456	32.2323	32.1347	7.43456	32.1771	32.3328	32.3819	32.2837	5.98955	32.3013	32.3591	32.1012	32.4624	10.2802	32.5702	32.2543	32.345	11.4942	0.526888	0.0109949	0.665317	0.00331841	0.677479	0.00464366	0.76132	0.00780017	139348	104124	163195	8811.09	172469	203200	201336	188163	193774	215853	223328
TRX1	YLR043C	Thioredoxin-1	P22217	No	No	65	29.2619	28.6276	28.6807	28.4388	26.706	28.8582	28.8031	28.5398	28.3699	15.545	29.0523	29.0461	28.889	28.7951	8.60835	29.1188	29.0821	28.8325	29.2694	12.2472	29.3901	28.7522	29.418	23.9095	-0.109515	0.622831	0.193361	0.344348	0.323428	0.155967	0.434508	0.178781	25617.9	16503.7	17123.3	980.63	19364.5	18639.5	15529.9	13804	22153.3	22058.6	19782
TRS33	YOR115C	Trafficking protein particle complex subunit 33	Q99394	No	No	27.6				26.0021																																66.1773
TRS31	YDR472W	Trafficking protein particle complex subunit 31	Q03337	No	No	47.3	26.8901	27.8278	26.6309		46.536	27.2434		27.3859	27.2244	6.21919	27.6231	27.523	27.4541	27.2291	11.2442	27.7346	27.5365	27.393	27.6624	10.2429	27.3604	27.7505	27.6447	13.5506	0.168293	0.670442	0.341083	0.335008	0.465382	0.201834	0.468958	0.286611	1752.94	3357.75	1464.71		2239.35		2471.91	2210.03	2913.63	2718.28	2591.57
TRS23	YDR246W	Trafficking protein particle complex subunit 23	Q03784	No	No	8.7													25.3789																														784.586
TRS120	YDR407C	Trafficking protein particle complex II-specific subunit 120	Q04183	No	No	18.9	27.9196		28.5162		28.8324		28.3543				28.2154						28.2269				28.2682	28.2739	28.3098	1.56915	0.136382		-0.00243815		0.00899614		0.0660682	0.786333	768.713		1162.43			1039.01			943.694
TRR1	YDR353W	Thioredoxin reductase 1	P29509	No	No	81.8	31.3812	31.6868	31.2723	31.6831	14.4756	31.5184	31.5155	31.4879	31.6108	3.76901	31.5089	31.3818	31.4281	31.5446	5.13687	31.3324	31.5409	31.4282	31.3235	7.14812	31.3094	31.5667	31.3128	10.5107	0.0272942	0.810813	-0.0399992	0.733436	-0.0995834	0.428523	-0.109514	0.481313	36524.4	45140.3	33867	3049.15	40166.4	40085.4	39326.7	42825.1	39902.6	36538.7	37729.7
TRP5	YGL026C	Tryptophan synthase	P00931	No	No	84.6	33.4608	33.3054	33.2177	33.184	8.76612	33.1101	33.2248	33.1449	33.2167	3.85252	33.2481	33.2	33.2462	33.188	2.15155	33.3067	33.3256	33.435	33.3452	3.99654	33.4882	33.5498	33.4783	2.70489	-0.11784	0.132925	-0.0713627	0.30567	0.0612011	0.402955	0.213512	0.0367581	68979.4	61936.7	58284.1	3855.91	54095.3	58570	55416.3	58243.3	59527	57574	59445.3
TRP4	YDR354W	Anthranilate phosphoribosyltransferase	P07285	No	No	54.5	28.6719	28.9196	28.2227	28.4927	20.1961	27.5451	28.4966	28.2848	27.9467	27.4989	28.2924	28.584	28.3218	28.0742	14.6278	28.09	28.1751	28.1941	28.5274	14.0647	28.1405	28.084	27.7867	12.689	-0.508438	0.0928056	-0.258638	0.201316	-0.330087	0.109279	-0.572977	0.0332188	4621.36	5487.15	3385.03	276.416	2116.28	4092.51	3533.94	2795.55	3552.52	4348.18	3625.68
TRP3	YKL211C	Multifunctional tryptophan biosynthesis protein;Anthranilate synthase component 2;Indole-3-glycerol phosphate synthase	P00937	No	No	64.3	30.3043	30.4466	29.9002	30.1176	16.1095	30.1333	30.3879	30.2392	30.3513	7.89177	30.1448	29.8667	30.253	29.9555	12.1888	30.4255	30.3287	30.4888	30.4768	4.9701	30.38	30.6026	30.4023	8.68598	0.0857733	0.538853	-0.137177	0.387974	0.2378	0.10323	0.26946	0.136546	11082.7	12231.2	8375.33	659.411	9843.94	11743.9	10593.7	11449.6	9922.51	8182.83	10695.7
TRP2	YER090W	Anthranilate synthase component 1	P00899	No	No	59.4	31.4745	31.7079	31.6426	31.5082	7.67122	31.059	31.1166	31.0524	31.0741	2.01278	30.9743	30.7486	30.8216	30.9389	7.1901	31.1328	30.9871	30.9896	31.0469	4.80149	31.0622	31.2038	30.926	9.62824	-0.507797	0.000111763	-0.712491	8.33103e-05	-0.544216	0.000156517	-0.519298	0.00261639	23500.3	27627.3	26404.9	1629.1	17620.1	18336.8	17539	17804.4	16614.3	14208.2	14946.2
TRP1	YDR007W	N-(5-phosphoribosyl)anthranilate isomerase	P00912	No	No	25														25.7597							26.3148
TRM9	YML014W	tRNA (carboxymethyluridine(34)-5-O)-methyltransferase	P49957	No	No	39.1	26.7534	26.3213	26.8324	26.6509	14.7201	26.7667	27.0045	27.1995	26.9479	12.3867	27.0851	27.244	26.8887	27.4275	15.8166	27.5258	27.0846	27.4422	26.9912	18.0553	27.3938	27.7312	27.6312	11.723	0.340164	0.0553977	0.521805	0.0174767	0.62144	0.0114286	0.945873	0.00181967	1559.27	1155.69	1647.07	98.3547	1573.75	1855.75	2124.24	1784.35	1962.29	2190.81	1712.54
TRM82	YDR165W	tRNA (guanine-N(7)-)-methyltransferase non-catalytic subunit TRM82	Q03774	No	No	37.8	27.9358	27.9457	27.4313	27.6968	16.1354	26.6477	27.2689	26.9463	27.1961	18.6166	26.6315	25.6021			48.4163	26.512			26.797	13.9252	26.3426	26.7724	26.296	19.0176	-0.737643	0.00735802	-1.63564	0.0108856	-1.09793	0.0055685	-1.28208	0.00113123	2273.68	2289.36	1602.78	130.47	931.081	1432.13	1145.12	1361.64	920.631	451.035
TRM8	YDL201W	tRNA (guanine-N(7)-)-methyltransferase	Q12009	No	No	47.2	28.0569	28.2316	28.2542	28.7451	21.9255	27.7577	27.7279	28.0058	27.8415	8.86456	27.1936	27.2639	27.9247	27.7847	25.2236	26.698	27.1457	27.1469	27.1937	14.8672	26.9155	26.6182	26.3587	19.3456	-0.488735	0.0226005	-0.780242	0.0161738	-1.27589	0.000503728	-1.69116	0.000602319	3738.79	4220.15	4286.83	407.988	3038.65	2976.39	3608.78	3220.21	2055.18	2157.88	3411.42
TRM732	YMR259C	tRNA (cytidine(32)-2-O)-methyltransferase non-catalytic subunit TRM732	Q03496	No	No	4.6														25.3419			25.9092
TRM7	YBR061C	tRNA (cytidine(32)/guanosine(34)-2-O)-methyltransferase	P38238	No	No	21.9	27.079	27.7482	26.6029	27.418	32.5308	26.6996	26.6294	26.9942	26.76	11.3578				26.9516		27.0339	26.2838	26.6252	26.42	23.8405	26.5612	26.9692	26.7774	14.0533	-0.441187	0.137086	-0.260388		-0.621253	0.0792933	-0.442728	0.207441	1826.64	2904.69	1313.19	156.47	1404.29	1337.55	1722.41	1464.33
TRM5	YHR070W	tRNA (guanine(37)-N1)-methyltransferase	P38793	No	No	37.7	27.8747	28.3455	28.1261	27.2352	30.0602	27.2744	26.3972	26.7893	27.0421	24.9887	28.0372	27.836	28.0444	27.1981	24.3714	27.2244	27.984	27.7948	26.8214	34.9189	27.8773	27.4203	27.6427	15.8242	-1.01959	0.0155239	-0.116451	0.722003	-0.439192	0.266419	-0.24858	0.451917	1946.95	2698.28	2317.59	84.6405	1284.31	699.2	917.542	1093.25	2179.06	1895.45	2189.98
TRM44	YPL030W	tRNA (uracil-O(2)-)-methyltransferase	Q02648	No	No	30.2	27.1878	26.915	26.8643	26.8318	11.792	26.2665		26.2915	27.0956	35.0576	26.5665	26.1124	26.204	26.1934	14.8671	26.5841	26.9472	26.9149	26.9597	11.6674	27.3933	26.6523	26.114	44.8449	-0.398543	0.16787	-0.680654	0.00192868	-0.0982958	0.447362	-0.229903	0.510676	1053.93	872.348	842.222	55.7675	556.52		566.227	988.648	685.153	500.135	532.916
TRM3	YDL112W	tRNA (guanosine(18)-2-O)-methyltransferase	Q07527	No	No	14.1	27.9216	27.8596	27.418	28.2086	21.7396	27.1977	27.859	27.5772	27.0381	25.961		27.7378		26.9058	39.6854		27.1029		27.6762	27.7353	26.7155	27.563		40.3799	-0.433929	0.129683	-0.530176	0.208076	-0.462387	0.199887	-0.712679	0.116562	688.668	659.738	485.749	56.9042	416.972	659.44	542.445	373.305		606.293
TRM2	YKR056W	tRNA (uracil(54)-C(5))-methyltransferase	P33753	No	No	14.7	28.396		28.4396		2.13925											27.0491							27.8452						-1.36872		-0.57254		2167.69		2234.27
TRM12	YML005W	tRNA wybutosine-synthesizing protein 2	Q04235	No	No	6.1																						25.0448
TRM11	YOL124C	tRNA (guanine(10)-N2)-methyltransferase	Q12463	No	No	9.7			25.1676																																336.526
TRM10	YOL093W	tRNA (guanine(9)-N1)-methyltransferase	Q12400	No	No	14.3						24.4807																															303.213
TRM1	YDR120C	tRNA (guanine(26)-N(2))-dimethyltransferase, mitochondrial	P15565-2	No	No	50.5	29.1751	29.1868	29.5245	29.2057	12.3061	28.2969	28.6235	28.2659	28.4772	11.7374	28.44	28.2772	28.5356	28.7814	14.8838	28.7184	28.1815	28.6113	28.541	15.1909	28.5465	28.2992	28.3082	9.97482	-0.857154	0.000353258	-0.764484	0.00129628	-0.759961	0.00184129	-0.88841	0.000717217	4358.13	4393.65	5552.67	301.483	2371.04	2973.41	2320.71	2686.75	2618.37	2338.9	2797.62
TRL1	YJL087C	tRNA ligase	P09880	No	No	12.3	25.3152	25.7585		25.9157	20.4873	25.8519	25.8506	26.0103	25.6693	9.60163	25.6223	25.9253			14.7958	26.0932	25.8921	25.8293	26.0269	8.38166	24.7709	25.7065	25.692	32.552	0.18239	0.336287	0.110696	0.696942	0.297237	0.134441	-0.273367	0.48756	195.789	266.204		20.1041	284.02	283.748	316.984	250.25	242.235	298.844
TRA1	YHR099W	Transcription-associated protein 1	P38811	No	No	9.4	27.4665	27.1761	28.1901	26.6915	45.2045	27.5049	27.0026	27.403	27.1168	16.2504	27.943					27.7129	27.5428	27.2181	27.1159	19.331	27.6337	27.6893	27.5115	6.23219	-0.124208	0.723528	0.561917		0.0163958	0.963422	0.230449	0.564273	191.411	156.514	316.094	7.5757	196.582	138.782	183.175	150.218	266.324
TPT1	YOL102C	tRNA 2-phosphotransferase	Q12272	No	No	20.9	24.6674																	25.3487				24.9412							0.681351		0.273868		454.757
TPS3	YMR261C	Trehalose synthase complex regulatory subunit TPS3	P38426	No	No	46.7	29.1937	29.7721	29.2602	29.4926	18.7483	29.8194	29.968	30.0173	29.9732	5.83737	29.9955	29.7994	30.0738	30.0177	8.01175	30.0045	30.1178	30.0506	30.1298	4.05915	30.2141	29.9719	30.0157	9.1354	0.51483	0.00967287	0.541957	0.00932119	0.64603	0.00295385	0.637566	0.0123867	2310.27	3449.54	2419.19	192.469	3564.49	3951.34	4088.67	3965.64	4027.35	3515.54	4251.96
TPS2	YDR074W	Trehalose-phosphatase	P31688	No	No	53.5	30.1218	30.1501	30.1681	30.0133	4.71465	31.5096	31.9327	31.7372	31.7349	11.8921	31.5637	31.4702	31.3811	31.3184	7.45257	31.3233	31.3482	31.2177	31.5205	8.84185	31.1024	31.3601	31.127	10.1119	1.61527	2.36121e-06	1.32004	8.23736e-07	1.23909	2.40456e-06	1.08317	3.94049e-05	5072.25	5172.97	5237.66	318.631	13273	17797.4	15541.1	15516.7	13781	12915.7	12142
TPS1	YBR126C	Alpha,alpha-trehalose-phosphate synthase [UDP-forming] 56 kDa subunit	Q00764	No	No	69.1	31.062	30.489	31.112	30.2784	27.891	31.6728	32.0806	32.0403	32.1662	14.1458	31.8448	31.6924	31.9817	31.9349	8.63641	31.7368	31.8829	31.79	31.9959	7.96807	31.5016	32.1996	31.9445	23.5376	1.25463	0.00174813	1.12806	0.00203314	1.11604	0.00205268	1.14651	0.0122316	17851.3	12000.1	18481.1	702.29	27261.1	36166.8	35169.8	38376.5	30712.2	27632.9	33768.3
TPO4	YOR273C	Polyamine transporter 4	Q12256	No	No	5												24.8029		24.4452	17.4419																											178.717
TPO3	YPR156C	Polyamine transporter 3	Q06451	No	No	12.2	27.3364	27.541	26.8623	27.6235	21.7093	27.4675	27.3849	27.3264	27.2226	7.10151	27.4548	27.8403	28.5153	28.0582	30.9835	27.5216	27.4435	28.0605	27.589	20.7691	26.7314	27.0202	26.6246	14.5474	0.00956766	0.95891	0.626352	0.0661379	0.312851	0.20469	-0.548703	0.0585031	1113.12	1282.79	801.373	91.9805	1219.07	1151.22	1105.44	1028.71	1208.37	1578.44	2520.25
TPO2	YGR138C	Polyamine transporter 2	P53283	No	No	6.5			25.3432						25.4705																0.127281										281.574					307.544
TPO1	YLL028W	Polyamine transporter 1	Q07824	No	No	11.6																						25.4055
TPM2	YIL138C	Tropomyosin-2	P40414	No	No	84.5	29.0144	28.8513	29.3292	29.1514	14.0905	29.0281	29.197	29.1893	29.1226	5.34332	29.5995	29.7308	29.6054	29.4662	7.47348	29.7173	29.5051	29.5393	29.4957	7.41708	29.8312	29.1899	29.5731	21.7578	0.047696	0.676405	0.51391	0.00424028	0.477774	0.00573622	0.444833	0.0732946	12697.4	11340.4	15793.8	945.57	12818.7	14411.5	14334	13686.8	19048.5	20862.8	19126.7
TPM1	YNL079C	Tropomyosin-1	P17536	No	No	95	32.1296	32.1098	32.0821	32.0513	2.35503	32.3052	32.096	32.1919	32.1616	6.12755	32.692	32.6736	32.6828	32.6851	0.525572	32.6995	32.5401	32.7066	32.5324	6.67553	32.5776	32.0369	32.3463	18.4721	0.0954912	0.0879383	0.590212	4.43807e-08	0.526464	4.89965e-05	0.227039	0.147505	89240.3	88024.7	86351.4	5724.33	100796	87187.1	93177.5	91244	131786	130119	130951
TPK2	YPL203W	cAMP-dependent protein kinase type 2	P06245	No	No	35	27.4099	27.4079	26.7584	27.3882	19.7887	27.7034	28.0973	28.3661	28.1706	18.3261	28.1796	28.1809	28.2538	27.5846	19.3357	27.9256	28.2936	28.1856	28.5461	17.7591	28.4289	28.9402	28.1829	27.6458	0.84326	0.00741867	0.80864	0.0112667	0.996658	0.00288749	1.27626	0.0049435	1802.98	1800.45	1147.79	120.281	2209.74	2903.55	3498.07	3054.81	3073.92	3076.75	3236.1
TPK1	YJL164C	cAMP-dependent protein kinase type 1	P06244	No	No	13.4	25.1214	26.1023	25.0385	25.5299	36.0579	25.4655	26.5832			52.1976	26.5959	26.2917	26.5154	26.0011	17.6838	26.9299	26.6984	27.059	27.2394	15.5562	26.4477	26.5311	26.4473	3.3771	0.576293	0.313346	0.90297	0.0173043	1.53362	0.00124425	1.02735	0.0162135	354.182	699.048	334.416	31.8378	449.578	975.601			984.238	797.094	930.809
TPI1	YDR050C	Triosephosphate isomerase	P00942	No	No	99.6	35.8041	35.5241	35.7477	35.4688	11.3737	35.8569	35.7498	35.7313	35.7542	4.00519	35.8543	36.0476	36.0616	36.0937	7.25591	35.9479	35.9845	35.9457	35.6869	9.08861	35.7867	35.6464	35.7106	4.8787	0.136852	0.166895	0.378112	0.00857841	0.255081	0.0547753	0.078353	0.481497	1.00106e+06	824475	962666	53733.7	1.03835e+06	964084	951754	967005	1.03648e+06	1.18514e+06	1.19663e+06
TPD3	YAL016W	Protein phosphatase PP2A regulatory subunit A	P31383	No	No	26.8	28.6952	28.7628	28.6011	28.0672	19.8015	28.8714	29.4347	29.2262	29.5188	18.8711	29.0532	28.9986	29.0929	28.8892	6.03528	29.2744	29.3008	29.317	29.307	1.25826	29.2323	29.6795	29.5499	15.4148	0.731224	0.0142403	0.476886	0.0272834	0.768242	0.00286651	0.955684	0.00710205	2740.5	2871.9	2567.35	120.089	3096.5	4575.48	3959.76	4850.21	3512.27	3381.82	3610.2
TPA1	YER049W	Prolyl 3,4-dihydroxylase TPA1	P40032	No	No	56.4	29.3323	29.7385	29.5166	29.3656	13.2374	28.8905	28.986	29.108	29.0374	6.3046	29.0269	28.4605	29.2299	29.1384	21.5224	29.0427	28.9426	28.9463	29.3881	15.485	29.2336	29.1497	28.9585	9.59069	-0.482761	0.00340849	-0.524322	0.0368349	-0.408303	0.0268881	-0.37431	0.03368	4081.7	5408.77	4637.66	282.872	3004.98	3210.59	3493.86	3327.07	3302.92	2230.37	3801.94
TOS1	YBR162C	Protein TOS1	P38288	No	No	22.6	27.2941		27.1266		8.20071	27.4891	27.7754	27.5051	27.3142	13.5048	27.0432	27.4149		27.3611	13.3692	27.6984	27.3983	27.3079	27.6752	13.4797	28.0983	28.0033	27.8974	6.94958	0.310614	0.110041	0.0627023	0.724875	0.309562	0.118139	0.789308	0.00394091	1533.07		1365.02		1754.97	2140.17	1774.53	1554.59	1288.35	1666.94
TOR2	YKL203C	Serine/threonine-protein kinase TOR2	P32600	No	No	4.3																					25.2423	25.3038	25.4137	6.06424
TOP3	YLR234W	DNA topoisomerase 3	P13099	No	No	5.5								24.8112				26.1966		25.4406	36.2259																								176.974			462.334
TOP2	YNL088W	DNA topoisomerase 2	P06786	No	No	23.4	29.7588	29.2717	29.4975	29.3092	16.0029	29.0826	29.2155	29.2018	28.9936	7.20349	28.9839	28.8481	29.2169	29.035	10.6898	28.6964	28.6666	28.8629	28.6628	6.7828	28.7324	28.3909	28.2945	16.4724	-0.335966	0.0342857	-0.438351	0.0175348	-0.737153	0.000893869	-0.986741	0.00227792	2473.43	1764.66	2063.7	122.657	1547.83	1697.19	1681.21	1455.28	1445.53	1315.69	1698.88
TOP1	YOL006C	DNA topoisomerase 1	P04786	No	No	33.6	27.2094	26.5252	27.017	27.4848	26.5059	27.4901	27.3241	27.4385	26.7695	20.6122	27.0759	27.5665	27.2648	26.6788	25.072	27.8863	27.4121	27.5301	27.4532	15.9088	27.7413	27.9901	27.791	9.31558	0.196471	0.480745	0.0874405	0.76094	0.511355	0.0672497	0.781736	0.0251583	770.941	479.794	674.71	63.1917	936.575	834.73	903.637	568.344	702.829	987.498	801.147
TOM71	YHR117W	Protein TOM71	P38825	No	No	31.6	26.9412	27.5823	27.5036	27.2188	19.4661	27.1683	27.7384	27.5487	27.6082	15.9709	27.4792	27.5884	27.6156	27.5502	4.06549	27.7575	27.3709	27.4913	27.6119	11.5174	27.3229	27.2877	27.1187	7.41423	0.204398	0.324762	0.246823	0.148729	0.246379	0.192541	-0.0683762	0.720627	801.789	1250.41	1184.02	65.8197	938.428	1393.27	1221.6	1273.06	1164.11	1255.63	1279.59
TOM70	YNL121C	Mitochondrial import receptor subunit TOM70	P07213	No	No	57.4	31.036	31.2829	31.097	31.2775	8.67284	31.1033	31.2812	31.3051	31.3316	6.93944	31.2505	31.1943	31.3264	31.1697	4.86485	31.3207	31.3595	31.3661	31.3395	1.42165	31.2143	31.2793	31.2598	2.30394	0.0819585	0.353168	0.0618369	0.42278	0.173073	0.0349186	0.0777408	0.354383	14038.6	16659.1	14644.9	1123.92	14708.7	16639.3	16917.3	17231	16288	15666.3	17167.9
TOM7	YNL070W	Mitochondrial import receptor subunit TOM7	P53507	No	No	26.7	26.8006	27.1774	27.4795	26.9978	20.3749	26.8623	27.5455	27.1557	27.2022	19.6198	26.8115	26.8265	26.7192	26.6604	5.41268	27.0154	26.6991	26.7226	27.3022	20.3455	27.6901	27.5278	26.9958	23.5458	0.0776046	0.71263	-0.359384	0.0529007	-0.178983	0.410469	0.290769	0.288028	7607.22	9877.86	12178.4	590.635	7939.78	12748.5	9730.13	10049	7665.14	7745.19	7190.05
TOM6	YOR045W	Mitochondrial import receptor subunit TOM6	P33448	No	No	34.4																						26.4144
TOM5	YPR133W-A	Mitochondrial import receptor subunit TOM5	P80967	No	No	46	28.3525	28.1599	29.1502	29.2537	36.8565	27.9539	28.3869	28.6505	28.4677	19.2182	28.5621	28.1522	28.3683	28.3061	11.8648	28.7574	28.4469	28.5953	28.798	10.9396	28.9528	28.7862	28.8751	5.76705	-0.364288	0.289446	-0.381895	0.234999	-0.0796456	0.791474	0.142316	0.684049	25603.9	22402.9	44505.5	3238.24	19423	26221	31478.6	27731.5	29605.8	22284.1	25885.6
TOM40	YMR203W	Mitochondrial import receptor subunit TOM40	P23644	No	No	45.5	28.9296	29.6701	29.446	29.5191	20.3974	29.2779	29.5875	29.6094	29.7364	12.8916	29.4659	29.4026	29.4008	29.5934	6.40105	29.401	29.4696	29.3419	29.6581	9.77736	29.8271	29.8114	29.785	1.47171	0.161599	0.422884	0.0744711	0.671294	0.0764434	0.677202	0.416622	0.0804081	5438.02	9085.25	7778.47	554.133	6922.95	8579.64	8711.3	9512.47	7886.63	7547.57	7538.21
TOM22	YNL131W	Mitochondrial import receptor subunit TOM22	P49334	No	No	52.6	29.1074	29.2718	29.0707	29.2462	6.90561	29.1509	29.0849	29.1781	29.4158	10.3827	28.8032	28.9969	29.156	28.7233	13.6546	29.3951	29.2729	29.2953	29.3197	3.72489	29.0084	29.5102	29.3994	17.4141	0.0334038	0.71653	-0.254181	0.0593288	0.146716	0.0409538	0.131958	0.390314	15401.2	17260.4	15013.7	1148.34	15872.8	15162.6	16175	19071.4	12472.8	14265.5	15929
TOM20	YGR082W	Mitochondrial import receptor subunit TOM20	P35180	No	No	50.8	28.2264	28.8471	28.5007	28.5992	17.6488	27.7653	27.9088	27.8566	28.1166	10.5927	27.3514	28.0481	27.5585	26.9634	31.856	27.7278	26.9994	27.2443	27.2316	22.4516	28.2585	28.2178	28.4882	10.3552	-0.631512	0.00534209	-1.06298	0.00641844	-1.2426	0.000797536	-0.221879	0.242344	6910.73	10626.4	8358.28	606.029	5020.43	5545.27	5348.32	6404.6	3768.29	6107.52	4349.91
TOM1	YDR457W	E3 ubiquitin-protein ligase TOM1	Q03280	No	No	13.4	26.804	27.1972	26.5869	25.9113	34.6299	27.7671	27.2351	26.5063	26.2294	48.581	26.5421	27.5535	27.3504	27.1636	27.3424	27.0275	27.8749	27.1503	27.6825	28.1057	26.8519	27.6677	26.9494	32.9149	0.309582	0.509028	0.527518	0.179015	0.80894	0.0538609	0.531439	0.225499	140.002	183.866	120.442	5.10665	272.919	188.753	113.899	94.0035	116.758	235.364	204.465
TOF2	YKR010C	Topoisomerase 1-associated factor 2	Q02208	No	No	10																						24.2085
TOA2	YKL058W	Transcription initiation factor IIA subunit 2	P32774	No	No	55.7	28.6719		28.2353	28.8196	19.9914	28.6411	28.8566		29.2563	22.1512	29.2321	28.8306	28.9936	29.0067	11.6124	29.2515	28.9237	28.927	29.2964	13.9623	29.3772	29.1968	29.4275	8.23484	0.342346	0.245069	0.440095	0.0546933	0.524026	0.0394432	0.758186	0.0159401	14207.8		10498	1065.93	13907.2	16148.3		21302.6	20948.4	15859.2	17756.9
TMT1	YER175C	Trans-aconitate 3-methyltransferase	P32643	No	No	68.2	29.6007	28.8919	28.9271	28.7607	28.9662	29.2221	29.1094	29.1346	28.9827	6.78931	29.6656	29.5657	29.8008	29.863	9.20099	29.9527	29.912	30.038	29.9568	3.69459	30.0253	30.3233	30.0363	12.0801	0.0671134	0.742487	0.678677	0.0146606	0.919784	0.00291393	1.0832	0.00607	10469.6	6405.37	6563.67	396.071	8053.04	7447.75	7578.92	6821.5	10951.3	10218.2	12027.2
TMN2	YDR107C	Transmembrane 9 superfamily member 2	Q04562	No	No	11.3			26.7327																																653.078
TMA7	YLR262C-A	Translation machinery-associated protein 7	Q3E764	No	No	92.2	30.3279	30.2999	30.5928	30.2421	11.2623	30.243	30.4704	30.3595	30.27	7.22098	30.7703	30.9339	30.9483	31.0014	6.73702	30.6455	30.6596	30.6661	30.5272	4.44124	30.2178	30.3296	30.2379	4.17266	-0.0299239	0.759086	0.547833	0.00102781	0.258941	0.0220084	-0.103913	0.33052	86807.6	85139.3	104308	5539.45	81847.9	95825.2	88733.5	83393.7	117963	132128	133454
TMA64	YDR117C	Translation machinery-associated protein 64	Q04600	No	No	38.1	28.2137	27.6086	28.5582	27.3727	37.4268	27.6463	28.5421	28.2216	28.0133	25.6379	27.9808	27.1334	28.1544	27.8257	27.3793	27.1333	27.5247	28.1209	27.8819	28.6919	26.8904	27.3689	27.2417	16.5053	0.167527	0.630513	-0.164746	0.65654	-0.27309	0.461408	-0.771306	0.0747321	2175	1429.85	2761.61	82.2267	1467.72	2730.94	2186.95	1892.87	1850.67	1028.6	2087.31
TMA23	YMR269W	Protein TMA23	Q03525	No	No	37.4	25.8834		25.785		4.81851				25.7895												25.4827		25.7563	13.3672	-0.0447151						-0.214727	0.27762	1155.55		1079.4					1082.74
TMA22	YJR014W	Translation machinery-associated protein 22	P47089	No	No	47.5	28.2434	28.7893	27.9329	28.3748	25.1379	27.7915	28.6212	28.3833	28.3806	22.4208		27.862	28.4391	27.9783	22.0768	28.3729	28.4663	28.5977	28.7134	10.367	28.0994	28.2033	27.9143	9.99697	-0.0409588	0.875493	-0.241988	0.38895	0.202468	0.333435	-0.262757	0.28899	6315.56	9220.33	5092.84	468.517	4617.22	8206.5	6958.73	6945.81		4848.37	7233.4
TMA20	YER007C-A	Translation machinery-associated protein 20	P89886	No	No	69.6	28.0338	28.8119	28.4548	28.637	21.8056	28.5234	29.0067	28.6599	28.9741	16.1796	29.0965	28.7427	29.3339	29.1793	16.5159	28.826	28.7274	28.8714	28.985	7.43093	28.6144	28.7215	28.3135	14.1723	0.306639	0.184974	0.603706	0.0275843	0.36809	0.0804846	0.065445	0.78037	6059.15	10390.7	8112.38	623.321	8507.07	11892.5	9351.56	11627.3	12656.5	9903.89	14920.1
TMA19	YKL056C	Translationally-controlled tumor protein homolog	P35691	No	No	56.3	33.8778	33.7171	34.1739	33.8512	13.8565	33.3299	33.2042	33.2041	33.1912	4.62671	33.523	33.4204	33.4593	33.3907	3.98706	33.3671	33.4108	33.431	33.4561	2.59812	33.0865	33.1401	33.4048	12.1406	-0.672661	0.000574271	-0.45666	0.00390448	-0.488739	0.00249775	-0.694547	0.00431563	376574	336877	462362	25035.6	257578	236079	236067	233972	294460	274254	281745
TMA17	YDL110C	Translation machinery-associated protein 17	Q12513	No	No	40	27.0742	27.1184	27.3558	26.7183	17.6742	29.0442	28.9327	28.2647	28.7783	21.7747	28.9102	28.9117	28.614	28.6591	11.0007	28.5967	28.3621	28.0308	28.036	19.4601	27.759	28.208	28.0903	15.5399	1.68829	0.00023598	1.70706	3.19121e-05	1.1897	0.000774583	0.952421	0.00424982	3766.88	3884.18	4578.91	199.334	14757.8	13659.7	8597.45	12273.4	13448.5	13462.1	10952.5
TMA16	YOR252W	Translation machinery-associated protein 16	Q08687	No	No	39.3	26.24	27.2165	27.3969	26.894	31.5956	25.8515	26.1358	25.8412	26.3747	18.1671	25.8004	25.9824	25.775	25.808	6.78403	25.8946	26.3104	25.5128	26.0757	22.462	26.3547	25.9801	26.5281	18.6852	-0.886027	0.0208133	-1.09538	0.00549554	-0.988467	0.0176966	-0.649194	0.106411	1700.35	3345.86	3791.47	181.199	1298.97	1581.92	1289.73	1866.86	1253.79	1422.32	1231.93
TLG2	YOL018C	T-SNARE affecting a late Golgi compartment protein 2	Q08144	No	No	22.7								25.4548								25.539						25.4709																	448.195
TLG1	YDR468C	T-SNARE affecting a late Golgi compartment protein 1	Q03322	No	No	15.2																25.3053
TKL2	YBR117C	Transketolase 2	P33315	No	Yes	27.2						27.0413	26.9572	26.8694	27.1829	9.35234	26.9346	26.6402	26.683	27.0231	13.0115	26.5262	26.7401	26.1088	26.469	17.4935	26.1089	26.0291	26.184	5.36189													823.061	776.402	730.577	907.918	764.365	623.255	642.026
TKL1	YPR074C	Transketolase 1	P23254	No	No	69.9	34.7965	34.9395	34.8484	34.904	4.33769	34.5601	34.4597	34.48	34.3601	5.67319	34.3772	34.396	34.3947	34.4254	1.38881	34.4801	34.5177	34.5957	34.4281	4.91745	34.7307	34.6233	34.6193	4.43425	-0.407117	0.000223121	-0.473781	7.08001e-06	-0.366661	0.000239863	-0.214326	0.00665575	180764	199592	187379	13188.2	153443	143121	145150	133580	135167	136942	136821
TIP41	YPR040W	Type 2A phosphatase activator TIP41	Q12199	No	No	44.9			25.3783			27.2154	25.8997	27.0216		41.5786	27.0585	27.3333		27.1434	9.90672	27.6769	27.6568	27.7875	27.169	17.4671	28.3763	27.9633	28.5258	19.2501	1.33397		1.80013		2.1943		2.91022				475.368		1698.5	682.342	1484.97		1523.45	1843.14
TIP20	YGL145W	Protein transport protein TIP20	P33891	No	No	13.4																25.336
TIM54	YJL054W	Mitochondrial import inner membrane translocase subunit TIM54	P47045	No	No	36	25.6993	26.5585	26.1012	27.0922	41.8854	26.5346					26.5826	26.4204	26.6806	26.748	9.65706	26.6006	26.3289	26.4432	26.5529	8.28895		26.1638	26.68	25.0332	0.171756		0.245103	0.456737	0.118576	0.711691	0.059137	0.907267	449.578	815.524	593.999	79.9569	802.124				829.297	741.094	887.554
TIM50	YPL063W	Mitochondrial import inner membrane translocase subunit TIM50	Q02776	No	No	51.7	29.0063	29.3297	29.3533	29.4826	13.3822	29.1481	29.1826	29.4356	29.4044	10.2493	29.4864	29.1942	29.6756	29.4114	13.692	29.5352	29.4677	29.3208	29.5673	7.4064	28.9635	29.1109	29.1074	5.72771	-0.000288738	0.998239	0.148923	0.334787	0.179777	0.169471	-0.232372	0.12579	4375.43	5475.03	5565.35	412.24	4827.33	4944.34	5892.12	5766.1	6103.1	4984.02	6958.61
TIM44	YIL022W	Mitochondrial import inner membrane translocase subunit TIM44	Q01852	No	No	52.7	28.6885	28.9806	28.9983	28.9175	9.47996	28.7896	28.973	29.0639	28.8371	8.75259	28.8766	28.9219	29.0757	28.8889	6.55072	29.0327	28.8449	28.8926	28.7745	7.6806	28.6381	28.7375	28.5071	7.95899	0.0196596	0.843008	0.044557	0.618569	-0.010039	0.914661	-0.268652	0.0452206	3959.09	4847.62	4907.38	314.249	4246.54	4822.09	5135.62	4388.58	4510.48	4654.43	5178
TIM23	YNR017W	Mitochondrial import inner membrane translocase subunit TIM23	P32897	No	No	52.7	28.7639	29.0058	28.9226	28.837	7.274	28.4178	28.8137	28.5908	28.4551	12.818	28.0359	27.8304	28.4522	28.6693	26.2365	28.1053	28.2199	28.3904	28.4488	10.7941	28.3874	28.3234	28.3109	2.86434	-0.312976	0.0234786	-0.635371	0.0184689	-0.591206	0.000775827	-0.54175	0.000409115	8768.18	10368.6	9787.67	624.638	6898.09	9075.76	7776.78	7078.33	5293.65	4590.97	7064.29
TIM21	YGR033C	Mitochondrial import inner membrane translocase subunit TIM21	P53220	No	No	25.1	25.6276							25.3812	24.7751	29.2772		26.0432	25.8552	25.7258	11.1574	25.6447	25.6177	25.6751	25.5596	3.38071	25.7345	25.866	26.0774	12.1318	-0.54947		0.247121		-0.00333947		0.265032		851.985						718.21	471.844		1136.43	997.592
TIM17	YJL143W	Mitochondrial import inner membrane translocase subunit TIM17	P39515	No	No	19.6		26.4556	26.1507	26.3361	10.5149			26.7532			26.4979						26.4656						26.0921		0.439002		0.183717		0.151419		-0.222023			2481.07	2008.42	154.673			3049.37		2554.83
TIM11	YDR322C-A	ATP synthase subunit e, mitochondrial	P81449	No	No	75	26.9485	28.8335	27.3173	27.3626	68.4171	27.6672	28.2869	28.2964	27.696	24.0658	28.1667	28.0932	28.2149	27.9865	6.80364	28.6905	27.9768	28.0185	28.0538	25.977	28.0434	27.7359	28.3179	19.9661	0.37116	0.443158	0.499852	0.278342	0.56944	0.25221	0.416928	0.452854	5324.43	19666	6875.59	480.472	8762.63	13464.2	13553.4	8939	12387.5	11772.4	12808.9
TIF6	YPR016C	Eukaryotic translation initiation factor 6	Q12522	No	No	29	29.6674	30.2665	30.3299	30.0575	19.3525	29.6965	29.6257	29.7895	29.6381	5.25256	29.5243	29.5055	29.6069	28.8672	20.9917	29.5738	29.4125	29.8918	29.4282	16.2226	29.2543	29.1712	29.22	2.88772	-0.392879	0.043449	-0.70436	0.0210745	-0.503744	0.0353587	-0.865135	0.00462689	14409.3	21826.6	22806.7	1278.79	14702.5	13998.7	15681.7	14119.4	13048.5	12879.7	13816.9
TIF5	YPR041W	Eukaryotic translation initiation factor 5	P38431	No	No	57	31.9435	31.4839	31.829	31.7208	13.1948	30.9992	31.0721	31.0497	31.1228	3.55294	30.8977	30.7618	30.759	30.7133	5.6374	30.6317	30.6435	30.7418	30.7259	3.89361	30.8879	30.6502	30.6688	9.38837	-0.683352	0.000517215	-0.961357	9.96973e-05	-1.05859	4.67153e-05	-1.00866	0.00061913	40797.7	29666	37685.1	2367.69	21201.4	22300.9	21957.1	23097	19761.2	17985.1	17949.5
TIF4632	YGL049C	Eukaryotic initiation factor 4F subunit p130	P39936	No	No	35.4	28.958	28.4351	28.949	28.4662	19.9354	28.8478	28.5114	28.4601	28.316	16.2921	28.6855	28.8386	28.8188	28.8514	5.17819	28.8924	28.5539	28.6777	28.6542	10.1389	28.5618	28.2523	28.3774	10.8823	-0.168272	0.395236	0.0964868	0.544562	-0.00751988	0.964443	-0.304929	0.165116	2243.99	1561.69	2229.96	108.069	2078.97	1646.5	1588.97	1437.93	1857.7	2065.71	2037.53
TIF4631	YGR162W	Eukaryotic initiation factor 4F subunit p150	P39935	No	No	38.1	31.3097	31.3765	31.2945	31.2219	4.3922	30.6255	30.3793	30.6998	30.6723	9.70079	30.4222	30.4796	30.5397	30.3222	6.35794	30.4615	30.4192	30.4243	30.3347	3.67112	30.1306	30.0141	30.2101	6.78651	-0.706433	0.000115939	-0.859717	4.88861e-06	-0.890725	6.7017e-07	-1.18236	6.55124e-06	11111.4	11638.2	10994.9	708.049	6915.14	5830.17	7280.83	7143.07	6006.34	6250.13	6516.05
TIF34	YMR146C	Eukaryotic translation initiation factor 3 subunit I	P40217	No	No	77.2	30.5023	30.9008	30.415	30.651	15.1956	30.2716	30.0707	30.2843	30.3842	8.87564	30.0942	29.8386	29.2841	30.0049	22.6993	29.8477	29.9952	29.7584	29.8376	6.96112	30.0111	30.0002	30.1577	6.20036	-0.36456	0.0267386	-0.811835	0.00839625	-0.757544	0.000651672	-0.560943	0.008296	17545.7	23128.2	16515.5	1317.31	14953.5	13009.6	15085	16167.1	13223	11075.9	7541.47
TIF3	YPR163C	Eukaryotic translation initiation factor 4B	P34167	No	No	93.6	32.901	33.0314	33.0234	32.9853	4.07431	32.4634	32.3402	32.3854	32.4552	4.05355	32.2684	32.4884	32.5181	32.3889	7.68902	32.3517	32.0679	32.2314	32.2154	8.00393	32.1606	31.9923	32.1336	6.16187	-0.574204	9.34542e-06	-0.569334	0.000110616	-0.76868	2.28145e-05	-0.889762	1.82155e-05	73904.4	80892.7	80444.9	5305.84	54566.1	50100.8	51695.8	54258.3	47666.3	55519.8	56675.3
TIF11	YMR260C	Eukaryotic translation initiation factor 1A	P38912	No	No	49	29.7281	30.2143	29.9061	30.1526	15.2659	29.526	29.3491	29.4464	29.5441	6.07806	29.3129	29.1142	29.1527	29.091	7.13178	29.2525	29.2131	29.0059	29.1994	7.3802	29.5682	29.2153	29.2424	14.0882	-0.533858	0.0045071	-0.832568	0.000511065	-0.832559	0.000560586	-0.658318	0.0100478	22805.5	31944.1	25799.9	2072.68	19824.5	17536.8	18760.3	20073.7	17102.1	14901.2	15304.3
TIF1	YKR059W	ATP-dependent RNA helicase eIF4A	P10081	No	No	83	34.2846	34.395	34.4679	34.3548	5.31145	33.6972	34.1225	34.0334	34.0593	12.4521	33.7474	33.5318	33.5754	33.6383	6.57307	33.6954	33.7954	33.607	33.8002	6.30109	33.9257	33.8195	33.8669	3.69732	-0.39749	0.00832843	-0.752354	1.64596e-05	-0.65109	3.58266e-05	-0.504869	0.000198811	209328	225973	237676	14882.1	139309	187072	175869	179060	144240	124224	128036
THR4	YCR053W	Threonine synthase	P16120	No	No	80	33.1161	33.1546	33.0977	32.9498	6.06265	32.6268	32.4092	32.5821	32.6408	7.15987	32.5681	32.2936	32.3985	32.3175	8.84108	32.7017	32.6265	32.6704	32.7512	3.64341	32.98	32.9579	33.0092	1.78639	-0.514812	0.000315531	-0.685117	0.000108855	-0.392126	0.000280852	-0.0971969	0.134575	72420.8	74379.5	71504.4	4370.59	51590.8	44367.9	50017.8	52094.8	49533.2	40952.9	44038.8
THR1	YHR025W	Homoserine kinase	P17423	No	No	57.4	30.8249	30.8048	30.602	30.5919	8.72943	30.5003	30.4045	30.4155	30.3991	3.34067	30.5518	30.7135	30.6224	30.4015	8.99933	30.4513	30.4957	30.4154	30.377	3.51612	30.3306	30.2853	30.348	2.23646	-0.276098	0.00637556	-0.133613	0.19317	-0.271073	0.00721252	-0.384608	0.00395196	21967.8	21662.9	18822.9	1265.82	17541	16413.8	16539.7	16352.6	18178.5	20334.7	19090.9
THP3	YPR045C	Protein THP3	Q12049	No	No	5.1											24.9652											25.1663																			272.614
THO2	YNL139C	THO complex subunit 2	P53552	No	No	11.8	27.1691	27.7389	27.3802	27.5667	16.7925		26.2747						26.5247			26.7776	25.8179		25.921	39.2223		26.7632	26.4234	16.5782	-1.18904		-0.938973		-1.29157	0.00695573	-0.870425	0.0145866	366.83	544.471	424.634	32.7246		197.338					234.687
THO1	YER063W	Protein THO1	P40040	No	No	61.9	28.5489	28.9258	28.7867	28.8725	11.0872	29.3612	29.3449	29.419	29.1502	7.84315	29.669	29.6933	29.5355	29.5485	5.62278	29.6296	29.5422	29.377	29.405	8.27828	29.4235	29.1783	29.1787	10.0676	0.535363	0.001897	0.828118	0.000109337	0.704973	0.000459453	0.476702	0.0105821	7274.24	9446.27	8577.53	616.505	12774.1	12630.6	13295.8	11035.4	15811.8	16080.2	14414.6
THI80	YOR143C	Thiamine pyrophosphokinase	P35202	No	No	18.5																						24.3689
THI6	YPL214C	Thiamine biosynthetic bifunctional enzyme;Thiamine-phosphate synthase;Hydroxyethylthiazole kinase	P41835	No	No	33.5	25.1868	25.6073	27.3007	26.9548	63.8769	26.7662	26.7776	26.7698	26.3577	13.2908			26.314	26.5941	13.6855	26.6768	26.5213	26.1978	26.6487	14.3345	26.6889	27.1531	26.8994	16.1769	0.405429	0.466983	0.191612	0.816318	0.248778	0.651415	0.651386	0.338642	294.117	393.635	1273.1	67.8392	878.971	885.902	881.127	662.232			642.433
THI20	YOL055C	Hydroxymethylpyrimidine/phosphomethylpyrimidine kinase THI20	Q08224	No	No	30.5			24.8056				26.7294	26.8164	26.4764	11.9004	26.8868		27.0658	26.3679	23.5938	27.4102	27.5748	27.3684	27.2523	9.35884	26.3204	27.8083	27.4622	45.8808	1.86848		1.96793		2.59586		2.39141				213.984			811.89	862.387	681.313	905.513		1025.11
TGL4	YKR089C	Lipase 4	P36165	No	No	13.1																						26.2193	25.4895	35.0264
TGL3	YMR313C	Lipase 3	P40308	No	No	17.9	24.7374		26.1417		63.8668	25.5494	25.8432	25.4623	25.1666	19.2606	25.9964	26.1092	26.266	26.5955	18.8235	26.6217	26.0012	26.0886		24.4927	24.8207	26.2018	26.0182	43.2843	0.0658287	0.897126	0.802236	0.164616	0.797622	0.262877	0.240665	0.773908	169.88		449.675		298.253	365.616	280.785	228.752	406.583	439.66	490.138
TGL1	YKL140W	Sterol esterase TGL1	P34163	No	No	41.4	28.1695	28.0921	27.8288	28.5027	19.5456	28.7481	29.55	28.906	28.854	27.8084	29.2281	29.046	29.4781	29.3687	12.7226	28.763	29.2573	28.9903	29.1694	14.6916	27.9356	29.1338	28.4889	41.3003	0.86622	0.00906311	1.13193	0.000508772	0.896701	0.00227164	0.371126	0.315772	2143.32	2031.37	1692.45	182.854	3200.75	5580.12	3570.9	3444.47	4464.12	3934.88	5308.72
TFS1	YLR178C	Carboxypeptidase Y inhibitor	P14306	No	No	86.8	28.8277		27.2214		71.4916	30.5796	30.439	30.4202	30.585	6.12561	31.2538	31.1558	31.5958	31.5198	14.4543	31.3468	31.5316	31.4902	31.5275	5.85868	31.4748	31.4533	31.5004	1.63598	2.48138	0.00749075	3.35676	0.00288995	3.44949	0.00224813	3.45163	0.0103814	8745.29		2872.33		29453.8	26718.8	26373.7	29564	47002	43914.6	59574
TFG2	YGR005C	Transcription initiation factor IIF subunit beta	P41896	No	No	43.5	26.4319	26.5529	26.8704	26.7811	13.8885	26.4261	26.6745	27.2363	27.0994	25.2638	26.5675	26.7502	27.1967	26.5694	22.0785	26.9764	26.9195	28.1834	27.1019	48.3409	26.948	26.8145	26.6952	8.77929	0.199978	0.383856	0.111871	0.555788	0.636196	0.0900237	0.16016	0.28629	868.497	944.476	1177	74.9211	864.996	1027.53	1516.69	1379.42	954.079	1082.89	1475.64
TFG1	YGR186W	Transcription initiation factor IIF subunit alpha	P41895	No	No	35.1	27.2558	27.6514	27.9677	27.6463	19.7921	27.7769	27.6483	27.6613	27.7182	4.1153	27.5995	27.9642	28.0039	27.4942	17.5637	27.9599	27.8067	27.6432	27.5968	11.6517	27.2528	27.555	27.4205	10.4214	0.0708483	0.65053	0.135144	0.512409	0.12131	0.496342	-0.220915	0.291234	871.744	1146.77	1427.89	77.3858	1250.99	1144.27	1154.6	1201.11	1106.24	1424.4	1464.17
TFC7	YOR110W	Transcription factor tau 55 kDa subunit	Q12415	No	No	25.7	25.6304		25.2143		20.2533	25.9004						25.8311									26.0956	25.6844	25.2439	29.0614	0.478013		0.408723				0.252257	0.526779	472.539		354.147		569.78					543.061
TFC6	YDR362C	Transcription factor tau 91 kDa subunit	Q06339	No	No	4.8
TFC4	YGR047C	Transcription factor tau 131 kDa subunit	P33339	No	No	8.7												26.7818																														429.059
TFC3	YAL001C	Transcription factor tau 138 kDa subunit	P34111	No	No	13.7
TFB2	YPL122C	RNA polymerase II transcription factor B subunit 2	Q02939	No	No	19.9
TFA2	YKR062W	Transcription initiation factor IIE subunit beta	P36145	No	No	35.4	26.1926	26.2536	25.9966	26.3681	10.5611	26.2858	25.7898	26.0675	25.8903	15.3973		26.1587		26.1583	0.016993		25.9535	26.3979	25.9832	17.9703	26.4048	26.4168	26.455	1.82495	-0.194369	0.19646	-0.0442451	0.723701	-0.0911836	0.572833	0.22281	0.0616805	927.129	967.154	809.314	70.9087	989.01	701.243	850.101	751.858		905.551
TES1	YJR019C	Peroxisomal acyl-coenzyme A thioester hydrolase 1	P41903	No	No	16.3
TEF4	YKL081W	Elongation factor 1-gamma 2	P36008	No	No	66.7	33.9919	33.84	33.8315	33.7267	7.65759	33.3705	33.5233	33.4395	33.4817	4.49221	33.2463	33.0934	33.3201	33.305	6.9828	33.0381	33.0085	33.0802	33.1493	4.26912	32.6827	32.9077	32.717	8.57766	-0.393765	0.000816911	-0.606318	0.000195389	-0.778494	1.64498e-05	-1.07836	6.11984e-05	164191	147776	146911	9252.08	106728	118655	111956	115281	97924.3	88078.1	103066
TEF1	YPR080W	Elongation factor 1-alpha	P02994	No	No	92.8	36.9497	37.1738	37.0882	37.142	6.7063	36.9592	36.7952	36.946	36.9276	5.11766	36.8818	36.9595	36.9469	36.9628	2.59548	36.8576	36.9746	36.9559	36.7537	6.94751	36.8417	36.7602	36.8018	2.82596	-0.181414	0.0269102	-0.150681	0.0294521	-0.202973	0.028801	-0.287167	0.00559565	1.1861e+06	1.38537e+06	1.30557e+06	91781.5	1.19396e+06	1.06564e+06	1.18306e+06	1.16805e+06	1.13159e+06	1.19414e+06	1.18377e+06
TDH3	YGR192C	Glyceraldehyde-3-phosphate dehydrogenase 3	P00359	No	No	54.8	38.1144	38.3944	38.19	38.4575	11.2553	38.7137	38.2078	38.48	38.3911	14.7269	38.5212	38.8577	38.7051	38.7417	9.50746	38.6253	38.6636	38.5703	38.3046	10.7013	38.6349	38.3849	38.6338	9.67942	0.159075	0.276797	0.417341	0.00808639	0.251886	0.0710002	0.26208	0.0787283	3.72186e+06	4.51897e+06	3.92211e+06	319707	5.63827e+06	3.97076e+06	4.79526e+06	4.50871e+06	4.93409e+06	6.23025e+06	5.60475e+06
TDH2	YJR009C	Glyceraldehyde-3-phosphate dehydrogenase 2	P00358	No	No	37	34.0262	34.448	34.0002	34.4487	17.2934	34.42	34.3747	34.4398	34.2824	4.78627	34.1315	34.4041	34.3553	34.3124	7.99962	34.3012	34.4139	34.3963	33.9775	13.2049	34.1292	33.7575	34.104	13.7632	0.148438	0.298818	0.0700402	0.632528	0.0414218	0.806114	-0.233893	0.249201	218209	292309	214305	19806	286696	277828	290650	260603	234722	283540	274124
TDH1	YJL052W	Glyceraldehyde-3-phosphate dehydrogenase 1	P00360	No	Yes	80.4	33.9399	32.5032	33.1695	32.1019	57.4451	35.871	35.6123	35.7271	35.7344	7.37865	36.4929	36.4921	36.6628	36.6415	6.41409	36.5698	36.7455	36.7787	36.5225	8.76819	36.5667	36.432	36.643	7.32666	2.80757	0.000452894	3.64371	0.000105875	3.72547	9.64675e-05	3.6186	0.000645242	206088	76132.3	120818	3903.75	785922	656872	711286	714900	1.20945e+06	1.20877e+06	1.36054e+06
TDA3	YHR009C	Putative oxidoreductase TDA3	P38758	No	No	29.8	26.7837	26.6439	26.7804	26.7992	4.89732	26.4225	26.5637	25.7259	26.3913	22.939	26.3191	26.3301	26.4844	26.187	8.48072	26.4038	26.7887	26.7249	26.3614	15.0736	26.3321	26.7533	26.5537	14.5081	-0.475984	0.046678	-0.421676	0.00100261	-0.182093	0.164391	-0.205425	0.121885	896.547	813.745	894.529	61.3734	697.969	769.728	430.673	683.03	649.715	654.659	728.583
TDA2	YER071C	Topoisomerase I damage affected protein 2	P40045	No	No	31																		28.4002	28.0475	17.1986	27.7899	28.6988	28.0895	33.2215
TDA11	YHR159W	Topoisomerase I damage affected protein 11	P38854	No	No	11.7		26.8946				25.7495											26.4736								-1.14503				-0.420986					990.525			447.896
TDA10	YGR205W	Probable ATP-dependent kinase TDA10	P42938	No	No	40	27.1399	27.3708	27.6742	26.9384	22.2741	27.2596	27.7602	27.6557	27.8112	16.0785	27.9826	27.8377	28.0886	28.0886	8.03713	28.0062	27.8347	28.0163	28.2267	11.2289	27.619	27.88	27.9463	11.6212	0.340828	0.141731	0.718518	0.00535385	0.740147	0.0058481	0.534227	0.0478216	1983.46	2327.61	2872.53	116.814	2155	3048.89	2835.78	3158.6	3557.06	3217.21	3828.12
TDA1	YMR291W	Serine/threonine-protein kinase TDA1	Q03533	No	No	26.1	26.4064	27.2019	26.1123	26.753	33.1654	27.1602	27.5213	27.4891		13.2761															0.771802	0.0466713							600.548	1042.33	489.785	51.7145	1012.63	1300.66	1271.96
TCP1	YDR212W	T-complex protein 1 subunit alpha	P12612	No	No	71.2	30.7482	30.9018	30.64	30.7945	7.52057	30.6548	30.7862	30.8214	30.8167	5.29031	30.724	30.5039	30.7052	30.5255	8.02766	30.5442	30.4363	30.4913	30.52	3.19653	30.2538	30.5143	30.4429	9.14333	-0.00135381	0.984512	-0.156471	0.0963997	-0.273188	0.00358722	-0.367454	0.010111	13333	14830.7	12369	932.381	12496.9	13688.6	14026.4	13981.3	13111.2	11255.7	12941.2
TCO89	YPL180W	Target of rapamycin complex 1 subunit TCO89	Q08921	No	No	20.3	25.7338	24.7192	25.4603		33.1586	26.3497	25.6766	25.7802	25.1585	34.1183	26.4255	26.0365	26.3594	26.4823	13.0258	26.3608	26.264	25.8848	26.2605	13.6643	26.269	25.9526	25.8447	15.7254	0.436842	0.307304	1.02152	0.0147047	0.888129	0.0255419	0.717679	0.094403	280.805	138.993	232.313		430.351	269.9	289.989	188.466	453.561	346.377	433.25
TCD2	YKL027W	tRNA threonylcarbamoyladenosine dehydratase 2	P36101	No	No	38.5	28.0091	28.6642	28.1547	28.5317	21.166	28.4635	28.5555	28.3593	28.3797	6.27688	28.3104	28.4547	28.7499	28.4219	13.5505	28.4572	28.2685	28.3379	28.3634	5.44464	28.3043	28.5974	28.5917	11.2033	0.0995574	0.558252	0.144302	0.454672	0.0168103	0.919328	0.157906	0.46497	2402.74	3783.64	2657.93	233.763	3292.39	3508.97	3062.81	3106.49	2960.79	3272.28	4015.35
TCD1	YHR003C	tRNA threonylcarbamoyladenosine dehydratase 1	P38756	No	No	29.4	26.4198	26.8099			19.005		27.0385	26.5417	26.7988	17.106	26.8684		26.9408	26.6836	9.0159		27.0544	26.3558	27.0605	25.5121	26.7575	26.9309	26.8365	6.03089	0.178168	0.504198	0.216089	0.306626	0.208741	0.577515	0.226768	0.249385	821.101	1076.05				1260.8	893.511	1067.82	1120.59		1178.21
TCB3	YML072C	Tricalbin-3	Q03640	No	No	48.7	31.7616	31.5029	31.5478	31.3138	12.8155	31.1261	31.2536	31.3585	31.2601	6.55526	31.5326	31.1789	31.594	31.4768	12.0977	31.4219	31.3852	31.4352	31.442	1.74471	31.0689	31.2532	31.2875	7.96892	-0.281945	0.034515	-0.0859557	0.533344	-0.110453	0.278924	-0.328321	0.0440592	9515.02	7953.45	8204.87	472.432	6125.03	6691.12	7195.79	6721.44	8118.88	6353.45	8471.45
TCB2	YNL087W	Tricalbin-2	P48231	No	No	26.3	28.2537	28.3189	28.603	28.2054	12.9331	28.2184	28.3601	28.2644	28.4109	6.08465	28.4726	28.4237	28.4693	28.5813	4.70517	28.359	28.5539	28.4373	28.0812	13.4015	28.0807	28.0238	28.3739	13.4258	-0.0317924	0.759571	0.141482	0.18734	0.0125895	0.928359	-0.185785	0.239057	1079.83	1129.8	1375.66	70.7203	1053.75	1162.49	1087.89	1204.16	1256.76	1214.89	1253.93
TCB1	YOR086C	Tricalbin-1	Q12466	No	No	34.9	29.3205	29.4526	29.6265	29.4283	8.92775	29.8015	29.9101	30.0534	30.0206	7.82066	30.1839	30.0096	30.1025	30.0501	5.25804	30.0835	30.1989	30.2029	30.0618	5.16489	30.1904	30.0734	29.8857	10.5101	0.489431	0.00122303	0.629546	0.000141143	0.679796	9.05498e-05	0.592863	0.00247191	2244.11	2459.27	2774.28	163.766	3132.1	3377.05	3729.52	3645.84	4082.66	3618.06	3858.73
TBF1	YPL128C	Protein TBF1	Q02457	No	No	11.6														26.3075		26.027		25.7801		12.0726
TAZ1	YPR140W	Lysophosphatidylcholine acyltransferase	Q06510	No	No	6.3																			23.8509
TAT2	YOL020W	Tryptophan permease	P38967	No	No	4.4		21.7471	23.2187	23.053	45.5822	21.7339	21.9259	21.2999	21.0761	26.5435															-1.16396	0.0498969								24.0609	66.7298	4.0289	23.8422	27.2369	17.6489	15.1128
TAT1	YBR069C	Valine/tyrosine/tryptophan amino-acid permease 1	P38085	No	No	15	26.8083	28.0466	26.8884		52.2205																												764.177	1802.76	807.808
TAP42	YMR028W	Type 2A phosphatase-associated protein 42	Q04372	No	No	12.3											25.8683		26.1108	26.0503	8.57359	25.5758	25.8431		26.1678	20.6387		25.5595	26.1594	28.9864																	643.39		761.153
TAO3	YIL129C	Cell morphogenesis protein PAG1	P40468	No	No	3.8													26.348	25.9222	20.7202		26.2135	26.3216	26.7628	21.021																							141.521
TAN1	YGL232W	tRNA acetyltransferase TAN1	P53072	No	No	49.5	27.5486		26.733	26.0422	51.5499	27.2229	27.1901	27.2611	27.0512	6.19625	27.3367	26.5813	27.4119	26.975	24.807	27.8332	27.2414	27.2927	27.9855	25.9196	27.5574	27.0105	27.7987	26.3451	0.406742	0.319673	0.30164	0.512791	0.813605	0.115063	0.680942	0.240049	2616.2		1486.4	62.3607	2087.42	2040.51	2143.52	1853.27	2258.79	1338.08	2379.66
TAL1	YLR354C	Transaldolase	P15019	No	No	87.5	33.8551	34.0851	33.9769	33.9912	6.49818	34.1083	34.2493	34.2115	34.2667	4.83031	34.4678	34.3635	34.5149	34.4691	4.37896	34.4384	34.4982	34.4859	34.5253	2.50364	34.3827	34.5153	34.4575	4.59284	0.231875	0.00774551	0.47673	0.000159867	0.509902	5.5353e-05	0.474776	0.000723604	187573	219998	204099	13959.5	223559	246508	240146	249502	286816	266813	296340
TAH18	YPR048W	NADPH-dependent diflavin oxidoreductase 1	Q12181	No	No	12.7
TAH11	YJR046W	Cell division cycle protein CDT1	P47112	No	No	7.9
TAH1	YCR060W	TPR repeat-containing protein associated with Hsp90	P25638	No	No	33.3	27.9533		28.1336		8.8264	28.1925	28.4052	27.9021		17.2057											28.5535	28.3286	28.506	8.04783	0.123121	0.581456					0.419249	0.032511	9287.45		10523.9		10962	12703.5	8963.68
TAF9	YMR236W	Transcription initiation factor TFIID subunit 9	Q05027	No	No	56.1	26.1756		27.2503	27.1838	35.9428	26.6143	26.6759	26.9773	26.5047	14.6231	26.3703	26.9438	27.1343	26.9677	20.9381	26.5443	27.0069	27.1588	27.1989	19.05	26.3961	25.7657	26.7017	30.9093	-0.176882	0.59815	-0.0158906	0.965688	0.107299	0.765608	-0.582059	0.259737	1957.28		4122.59	266.601	2652.76	2768.45	3411.69	2458.73	2239.96	3333.45	3803.94
TAF8	YML114C	Transcription initiation factor TFIID subunit 8	Q03750	No	No	13.3													24.7937																														224.253
TAF6	YGL112C	Transcription initiation factor TFIID subunit 6	P53040	No	No	36.8	26.8142	27.1955	26.6234	27.1728	18.9105	26.6357	27.0132	27.0189	27.1733	14.9939	26.7242	26.8242	27.3	27.0404	18.157	26.6527	26.8879	26.8801	26.9788	9.30918	27.2266	26.9116	26.9759	11.831	0.00880016	0.962747	0.0206971	0.916556	-0.101648	0.539404	0.0865083	0.658176	911.16	1186.82	798.269	79.1197	805.141	1045.9	1050.07	1168.68	856.027	917.492	1275.93
TAF5	YBR198C	Transcription initiation factor TFIID subunit 5	P38129	No	No	35.6	27.9191	28.2044	28.2636	28.0486	10.6472	28.0905	27.8135	28.0433	28.1007	8.93573	27.9698	28.3452	27.9002	28.4366	18.4268	27.3321	28.1077	27.6416	27.103	31.2953	27.4636	27.2021	27.655	15.5215	-0.0969353	0.382684	0.0540126	0.738911	-0.562843	0.0505853	-0.668725	0.00550621	1275.39	1554.35	1619.48	94.4898	1436.36	1185.44	1390.07	1446.51	1321.02	1713.66	1258.86
TAF4	YMR005W	Transcription initiation factor TFIID subunit 4	P50105	No	No	33	28.1767		27.93	27.0898	35.2413	27.8871	27.8084	28.1256	27.975	9.56549	27.9216	27.7418	27.8433	27.776	5.54667	27.7048	27.9817	27.808	28.0089	9.90939	27.8747	28.3904	28.3216	18.2925	0.216853	0.483606	0.0884843	0.764126	0.14365	0.639367	0.463399	0.274802	3204.19		2700.66	102.158	2621.46	2482.27	3092.78	2786.21	2684.82	2370.33	2543.1
TAF14	YPL129W	Transcription initiation factor TFIID subunit 14	P35189	No	No	34	27.1425	27.6338	27.0185	27.8874	28.423	27.5342	27.0658	27.6598	27.6891	18.2826	27.9064	27.8342	27.8961	28.0057	4.96395	28.5752	27.8437	28.0429	27.8328	26.2453	28.2432	27.5307	27.7409	26.3078	0.0666611	0.799026	0.49003	0.0563048	0.653094	0.0510602	0.417722	0.222306	2413.88	3393.29	2215.1	273.962	3166.81	2288.91	3454.88	3525.92	4098.96	3898.87	4069.79
TAF13	YML098W	Transcription initiation factor TFIID subunit 13	P11747	No	No	13.8									24.4263																															526.852
TAF12	YDR145W	Transcription initiation factor TFIID subunit 12	Q03761	No	No	50.1	27.8713	27.7255	27.4376	27.4271	15.3625	27.6883	27.4967	27.7286	27.823	9.27694	27.6182	28.3202	28.0937	27.8628	20.7389	27.559	27.7336	27.8897	27.8154	9.62147	27.484	27.4834	27.8345	14.5563	0.0687878	0.614203	0.358371	0.103172	0.134058	0.344799	-0.0147344	0.931324	1797.4	1624.63	1330.77	89.4686	1583.34	1386.41	1628.14	1738.24	1508.22	2453.56	2096.96
TAF11	YML015C	Transcription initiation factor TFIID subunit 11	Q04226	No	No	22.3												25.4786					25.4581	25.4775	25.6154	6.03889	25.2271	25.4067	25.3477	6.27473																		514.593
TAF10	YDR167W	Transcription initiation factor TFIID subunit 10	Q12030	No	No	51.5	26.324	26.1784	26.8772	25.7975	32.1366	26.1043	25.9954	26.2365	25.7157	14.8034		26.1441	26.1031	26.3035	7.45969	26.3166	26.1573	26.5953	26.0957	16.075	26.6183	25.9572	26.5739	23.5259	-0.281313	0.302869	-0.110728	0.698371	-0.00305442	0.99065	0.0888469	0.791979	1631.65	1474.99	2394.25	76.7133	1401.2	1299.31	1535.61	1070.28		1440.38	1400
TAE2	YPL009C	Translation-associated element 2	Q12532	No	No	29.5	28.6718	28.9139	28.785	28.7955	6.8685	28.1401	28.933	28.8639	28.762	22.2982	28.7872	28.3467	28.8088	28.6793	13.8975	28.7588	28.494	28.6818	28.8255	9.65846	28.4625	28.8467	28.5586	14.2315	-0.116775	0.557873	-0.136056	0.291546	-0.101491	0.287941	-0.16894	0.194984	1605.66	1899.15	1736.78	118.476	1110.77	1924.45	1834.41	1709.3	1739.41	1281.73	1765.66
TAE1	YBR261C	Alpha N-terminal protein methyltransferase 1	P38340	No	No	37.5	28.2131	26.4324	26.5399	26.4107	74.371	27.0426	26.9108	26.8917	26.5286	14.4289	27.1347	26.9994	27.539	27.1833	16.7489	27.1205	27.2844	27.3197	27.1007	7.74364	26.8253	27.0491	27.1208	10.4157	-0.0556073	0.906218	0.31506	0.513452	0.307289	0.51336	0.0993655	0.857235	5336.93	1553.24	1673.49	103.623	2371.05	2164.03	2135.56	1660.36	2527.31	2301.08	3344.76
SYP1	YCR030C	Suppressor of yeast profilin deletion	P25623	No	No	56.1	29.6069	29.6692	29.6826	29.6104	2.72116	30.0432	30.0977	30.088	30.0149	2.68307	30.1294	30.1672	30.241	30.1719	3.24863	30.1398	30.0525	30.1463	30.1282	2.9707	30.0479	30.0341	30.0005	1.68522	0.4187	5.17222e-06	0.535112	2.16814e-06	0.474394	3.51414e-06	0.385212	2.5493e-05	3802.55	3970.25	4007.55	258.148	5145.47	5343.59	5307.78	5045.48	5462.18	5607.28	5901.66
SYO1	YDL063C	Synchronized import protein 1	Q07395	No	No	15.3	26.6473		25.6181	25.7593	41.5267																	25.1247									-0.883553		669.774		328.177	24.5104
SYN8	YAL014C	Syntaxin-8	P31377	No	No	13.3														23.9512
SYH1	YPL105C	SMY2 homolog 2	Q02875	No	No	25.8	27.5016	28.536	27.9652	28.5511	32.3479	27.1694	27.8088	27.2768	27.8221	23.4691							27.8517				27.7434				-0.619165	0.0891434			-0.286707		-0.395025		900.395	1844.29	1241.61	126.209	715.218	1114.05	770.515	1124.43
SYG1	YIL047C	Protein SYG1	P40528	No	No	12.4	27.8069		27.5564	27.4998	11.6225	27.3962			27.308	4.3195	27.6659		27.5413		6.09996	27.0494	26.9961	27.7958	28.1785	40.2892	27.3018	27.6627	27.5579	12.5274	-0.268952	0.122766	-0.0174238	0.902115	-0.116098	0.754456	-0.113549	0.470997	1007.27		846.742	55.1384	757.726			712.811	913.493		837.947
SXM1	YDR395W	Importin beta SMX1	Q04175	No	No	14.6	27.4679	28.0774	27.173	27.7325	26.7888	26.4512	27.4577	27.6784	27.7049	33.3383	27.8488		28.3005		21.9575	27.7112	27.3801	27.709	27.8093	12.3031	27.4852	27.0943	27.4745	14.6961	-0.289671	0.443201	0.461941	0.222506	0.0396761	0.859083	-0.261363	0.346981	765.628	1168.18	624.117	62.2913	378.409	760.266	885.898	902.354	997.011		1363.51
SWP82	YFL049W	SWI/SNF global transcription activator complex subunit SWP82	P43554	No	No	11.7																						25.6118
SWP1	YMR149W	Dolichyl-diphosphooligosaccharide--protein glycosyltransferase subunit SWP1	Q02795	No	No	26.9	26.5803	26.7981	26.6411		7.9013	26.835	27.5803	27.3294	27.3154	20.337	27.2891	27.272	27.4714	27.0674	11.3803	27.4514	27.4097	27.4211	27.8946	17.4856	27.1355	27.9621	27.6785	27.5767	0.591818	0.0274429	0.601817	0.00298282	0.871019	0.00206456	0.918816	0.0215791	1417.29	1648.23	1478.31		1690.89	2834.58	2382.02	2358.99	2316.48	2289.22	2628.49
SWI6	YLR182W	Regulatory protein SWI6	P09959	No	No	9.8						26.2215						26.1836	25.9615		10.8637						26.0833																386.299					376.277	322.592
SWI4	YER111C	Regulatory protein SWI4	P25302	No	No	7												25.1845					24.8159	25.3679	25.0257	19.6429																						137.711
SWI3	YJL176C	SWI/SNF complex subunit SWI3	P32591	No	No	21.5	27.2006		26.8244	26.2725	31.0001	26.8555	27.0411	26.8675	26.7996	7.43145	26.9871	27.0098	26.7717	26.9294	7.23622	27.1766	27.1119	26.8451	27.2876	12.5479	26.8089	27.0632	26.8121	10.3892	0.125082	0.61557	0.158618	0.528392	0.339438	0.234914	0.128903	0.671707	742.101		571.78	26.4133	584.241	664.446	589.101	562.013	640.005	650.157	551.236
SWH1	YAR042W	Oxysterol-binding protein homolog 1	P35845	No	No	26	27.7516	27.3168	28.3747	27.6398	32.6967	27.8207	27.7819	27.9612	27.8782	5.44909	27.8031	27.7129	27.6241	28.1477	16.7344	27.637	28.346	27.7915	27.6636	25.1349	27.6441	28.0656	27.7809	15.2173	0.0897486	0.703571	0.0511848	0.844119	0.0887938	0.75901	0.0594387	0.841288	747.848	553.258	1151.82	46.8698	784.516	763.7	864.768	816.451	775.018	728.025	684.573
SWD2	YKL018W	COMPASS component SWD2	P36104	No	No	31	26.8948	26.7844	26.6203	26.4656	12.8936	26.5904	27.0223	26.8203	26.9796	13.0676	26.8427	27.2578	27.3953	26.7595	21.4267	26.9616	26.9543	27.0188	26.6087	12.1732	27.0372	26.3506	26.2244	32.1967	0.161834	0.277871	0.372531	0.0858799	0.194527	0.19273	-0.153936	0.547548	1502.84	1392.16	1242.45	75.5882	1216.92	1641.71	1427.2	1593.77	1449.48	1932.81	2126.11
SWC4	YGR002C	SWR1-complex protein 4	P53201	No	No	4																						24.0038
SWA2	YDR320C	Auxilin-like clathrin uncoating factor SWA2	Q06677	No	No	31.7	26.2425		26.5436		14.7055	26.6663	26.8276			7.89853	27.0289	26.5779	26.6057		18.2921		26.3996	27.1723	27.0692	26.49	26.2681	26.5608	26.556	11.204	0.353887	0.174065	0.344425	0.214262	0.487289	0.238719	0.068595	0.710326	473.156		582.976		634.713	709.805			816.068	596.988	608.609
SVP26	YHR181W	Protein SVP26	P38869	No	No	11.8			22.8033			24.5881	25.5118	24.8579		34.3605	25.6553					25.7629		25.679	26.3076	24.9155		26.1325	25.7778	17.2952	2.18263		2.85201		3.11314		3.1518				124.512		429.029	813.863	517.263		898.985
SVL3	YPL032C	Styryl dye vacuolar localization protein 3	Q03088	No	No	31.6	28.7169	28.909	28.9163	28.9237	6.68559	28.3441	28.446	28.4387	28.4828	4.03938	28.7112	28.7784	29.002	28.5902	12.2654	28.3094	28.6332	28.4182	28.2525	12.0022	28.1192	28.3616	28.1821	8.86955	-0.438569	0.0002788	-0.0960338	0.373254	-0.463182	0.00319149	-0.645539	0.000620778	2140.83	2445.79	2458.16	167.331	1653.38	1774.34	1765.37	1820.2	2132.39	2234.09	2608.58
SVF1	YDR346C	Survival factor 1	Q05515	No	No	31	29.8203	29.5402	29.5852	29.3447	13.6668	29.0152	29.1572	29.4254	29.26	12.0257	29.0561	28.7207	28.9006	28.9665	9.62672	29.0493	29.0463	29.2435	29.1942	7.00273	29.0659	28.8966	28.9226	6.42174	-0.358162	0.0334415	-0.661689	0.00154326	-0.439317	0.0071439	-0.610904	0.00432577	7796	6420.35	6623.8	379.695	4461.81	4923.32	5929.15	5286.97	4589.94	3637.89	4120.94
SUR7	YML052W	Protein SUR7	P54003	No	No	27.5	25.7005	25.4164			13.8813	26.0961		26.6141		25.1217						27.3162	26.6653		26.893	23.4632	26.9385	27.2251	27.1675	10.2219	0.796636	0.114401			1.39969	0.0136539	1.55189	0.00211446	720.684	591.852			948.018		1357.58
SUR4	YLR372W	Elongation of fatty acids protein 3	P40319	No	No	13	30.4812	30.464	30.5131	29.8959	18.3938	29.5721	29.6283	29.5967	29.7237	4.67425	30.0005	29.8795	29.6844	29.2252	21.8596	29.3363	29.4078	29.5423	29.669	10.3054	29.0767	29.2712	29.4826	14.0785	-0.708367	0.0034197	-0.64118	0.0294797	-0.849724	0.00213084	-1.06177	0.0032103	16979.7	16779.2	17360.4	766.468	9042.14	9401.61	9197.8	10044	12168.3	11189.8	9774.1
SUP45	YBR143C	Eukaryotic peptide chain release factor subunit 1	P12385	No	No	69.1	30.9063	31.2315	30.9348	31.1455	11.0648	30.722	31.0217	31.0042	31.0339	9.82715	30.7944	30.6809	30.6355	30.5155	7.98082	30.7167	31.0326	30.6866	30.9193	11.5559	30.8982	30.9068	30.9301	1.146	-0.109068	0.356197	-0.397948	0.00672327	-0.215731	0.109138	-0.142822	0.190877	18360	23002.9	18726.8	1467.61	16158.5	19890	19649.1	20057.9	16989.7	15705.1	15217.9
SUP35	YDR172W	Eukaryotic peptide chain release factor GTP-binding subunit	P05453	No	No	64.4	31.7946	31.9182	31.9955	31.66	10.0581	31.6019	31.5323	31.5896	31.5801	2.09393	31.5107	31.4705	31.278	31.5127	7.4657	31.3922	31.4612	31.6073	31.641	8.14909	31.4482	31.5874	31.41	6.56762	-0.266103	0.0121195	-0.39912	0.00495671	-0.31667	0.0152659	-0.360238	0.0143185	21756.6	23702.7	25007.5	1342.1	19036.1	18139.6	18874.3	18750.5	17870.3	17378.6	15207.6
SUN4;SIM1	SUN4;SIM1	Probable secreted beta-glucosidase SUN4;Probable secreted beta-glucosidase SIM1	P53616	No	No	6.4	27.1634						26.5451		26.5972	2.55057				25.7136							26.0042	26.5709	26.0876	22.2252	-0.592199		-1.44981				-0.942463		1546.95					1007.8		1044.82
SUM1	YDR310C	Suppressor of mar1-1 protein	P46676	No	No	14.3	26.1999	26.7013	26.2477	25.9572	22.5717	26.3745	26.2928	26.0084	26.6783	19.1614	26.1404					25.5044	25.9765		25.4113	21.9752	25.909	25.5872	26.3576	27.1402	0.0619593	0.775377	-0.136102		-0.645802	0.0403201	-0.325249	0.269598	291.572	412.749	301.391	16.6879	329.072	310.969	255.32	406.205	279.793
SUL2	YLR092W	Sulfate permease 2	Q12325	No	No	6.6
SUL1	YBR294W	Sulfate permease 1	P38359	No	No	21.9
SUI2	YJR007W	Eukaryotic translation initiation factor 2 subunit alpha	P20459	No	No	71.7	30.2602	30.4603	30.4315	30.2828	7.04986	29.9331	30.5426	30.3379	30.2796	16.9196	30.4587	29.7847	30.1427	29.8741	21.7529	30.1988	30.3297	30.0407	30.3893	10.5034	29.9317	30.2162	29.8794	12.9396	-0.0854222	0.554438	-0.293697	0.116045	-0.119104	0.245553	-0.349625	0.0216948	16561.4	19025	18649	1139.29	13201.5	20141.6	17477.1	16785.5	19003.1	11910.6	15265.9
SUI1	YNL244C	Eukaryotic translation initiation factor eIF-1	P32911	No	No	78.7	30.7335	30.3067	30.569	30.4934	12.1968	29.6703	30.1301	29.8864	29.9559	13.039	29.7426	29.6415	29.517	29.4591	8.86165	29.8212	29.5147	29.7075	29.9286	12.0228	30.2864	29.8624	29.7177	21.2374	-0.614995	0.00321543	-0.935618	0.000137126	-0.782663	0.000776141	-0.570199	0.0234642	64830.8	48228.2	57844.1	3717.41	31026	42672.2	36038.1	37817.1	32620.2	30413.1	27898
SUC2	YIL162W	Invertase 2	P00724-2	No	No	26	26.6779		25.5457		52.8091			26.6155			26.963	26.7966	27.1716		13.0892	26.6867	26.9266	26.8873	27.3259	19.412	26.7505	27.0648	27.0367	11.6225	0.50376		0.86529	0.1468	0.84483	0.102606	0.838873	0.153565	819.896		374.055				785.225		999.058	890.232	1154.47
SUB2	YDL084W	ATP-dependent RNA helicase SUB2	Q07478	No	No	77.8	32.6697	32.5843	32.4276	32.4952	7.3306	32.4746	32.6642	32.6513	32.581	5.91672	32.5981	32.4504	32.6748	32.5914	6.37639	32.434	32.5077	32.5105	32.639	5.98496	32.4769	32.5739	32.5024	3.50915	0.048601	0.503464	0.034485	0.641967	-0.021399	0.762927	-0.0264395	0.709185	60719.6	57227.8	51337.4	3643.6	53040.2	60489.4	59948.2	57099	57777.9	52156.8	60933.8
SUB1	YMR039C	RNA polymerase II transcriptional coactivator SUB1	P54000	No	No	55.5	28.1255	27.9653	28.059	27.5638	16.2021	27.4213	27.8187	27.6718	27.6586	11.1314	27.6061	26.9897	27.8205	27.7796	23.5908	27.734	27.7686	27.9861	27.831	7.92562	27.3635	28.2816	27.6609	33.6468	-0.285804	0.106071	-0.379431	0.149672	-0.0984625	0.501502	-0.159717	0.581113	3955.12	3539.39	3777.11	181.467	2427.53	3197.41	2887.97	2861.63	2759.39	1799.88	3201.46
SUA5	YGL169W	Threonylcarbamoyl-AMP synthase	P32579	No	No	25.6	25.608	26.122	25.7353		19.1965																												491.325	701.614	536.642
STV1	YMR054W	V-type proton ATPase subunit a, Golgi isoform	P37296	No	No	16.6	26.7165		26.6918		1.20939		27.2852				27.2297	27.0873	26.8386	27.3424	14.5967	27.063	26.9931	27.2822	27.1834	8.91788	27.1932	27.049	26.7246	16.0917	0.581029		0.420362	0.0615641	0.426315	0.0114858	0.284772	0.210126	484.96		476.736			719.282			692.147	627.101	527.796
STU2	YLR045C	Protein STU2	P46675	No	No	12.8																						27.0074
STU1	YBL034C	Protein STU1	P38198	No	No	5.8																	26.8967				26.2297		26.7698	26.1638
STT4	YLR305C	Phosphatidylinositol 4-kinase STT4	P37297	No	No	8.1	27.3304		27.3176		0.62708	27.9233	27.7404	26.9317	27.2921	29.6588	27.5048	27.7447	27.6054	28.0022	15.4111	27.8916	28.3899	28.3864	28.2681	15.1613	27.983	27.8923	28.0655	5.9942	0.147877	0.682106	0.390281	0.0733772	0.910031	0.00670752	0.656247	0.00204668	351.592		348.487		530.304	467.157	266.694	342.383	396.78	468.553	425.427
STT3	YGL022W	Dolichyl-diphosphooligosaccharide--protein glycosyltransferase subunit STT3	P39007	No	No	31.1	28.5367	28.6009	28.2636	28.1353	15.1362	28.6513	28.8114	29.0317	28.7226	11.8034	29.2138	28.6185	29.0915	29.044	16.6932	29.0842	29.1367	28.9208	29.0878	6.35567	28.6493	29.102	28.861	15.7299	0.420122	0.0226768	0.607835	0.0117923	0.67326	0.00137816	0.486675	0.0356724	2135.5	2232.62	1767.14	109.496	2312.03	2583.37	3009.47	2429.16	3414.35	2260.09	3137.03
STR3	YGL184C	Cystathionine beta-lyase	P53101	No	No	46.2	24.3389		24.0068		16.2054							24.5803															0.407515						183.046		145.408							216.396
STR2	YJR130C	Cystathionine gamma-synthase	P47164	No	No	18.6
STP22	YCL008C	Suppressor protein STP22 of temperature-sensitive alpha-factor receptor and arginine permease	P25604	No	No	27.5	26.7953	26.1048			33.212		26.0413	26.5677	26.1304	20.3754	26.2653	26.4936	26.704		15.1185	25.873	26.3525	26.492	26.1577	17.9727	26.3918	26.3812	26.8579	19.7687	-0.203542	0.583334	0.0376057	0.909641	-0.231247	0.47248	0.093639	0.793671	1201.67	744.603				712.564	1026.34	757.945	832.226	974.939	1128
STO1	YMR125W	Nuclear cap-binding protein complex subunit 1	P34160	No	No	17.9	28.249	28.1197	28.2702	27.7168	16.4797	27.8554	28.2945	28.1552	28.0212	12.9062	28.0794	27.9577	28.4873	28.0969	16.8768	28.3019	27.9264	27.8184	28.2242	15.9389	27.8469	28.0178	27.7129	10.6466	-0.00734053	0.964681	0.0664154	0.71324	-0.0212076	0.906464	-0.229751	0.231954	1425.99	1303.73	1447.04	66.7776	1085.51	1471.67	1336.19	1217.69	1267.84	1165.25	1682.12
STM1	YLR150W	Suppressor protein STM1	P39015	No	No	82.8	34.3319	34.4696	34.6079	34.4281	8.0219	33.9864	33.9484	33.8131	33.7828	6.9177	33.3536	33.4455	33.3095	33.3976	4.05044	33.2716	33.1461	33.1046	33.2829	6.17742	32.8507	32.7483	32.8117	3.56829	-0.576703	0.000272202	-1.08281	2.80289e-06	-1.25808	2.38151e-06	-1.65582	2.94069e-06	322319	354590	390274	23333.3	253679	247076	224956	220290	163604	174366	158670
STI1	YOR027W	Heat shock protein STI1	P15705	No	No	77.1	33.4059	33.3227	33.4705	33.2395	6.92834	33.2014	33.0923	33.0997	33.1149	3.55201	33.1152	33.1796	33.1421	33.1581	1.88024	33.046	33.0164	33.0362	33.0165	1.0253	32.8413	32.8665	32.8933	1.80219	-0.232551	0.00608093	-0.210909	0.00667956	-0.330855	0.000620227	-0.492606	0.000460921	76789.5	72484.8	80304.7	4633.78	66642.4	61786.5	62104.3	62763.5	62773.6	65641.8	63955
STH1	YIL126W	Nuclear protein STH1/NPS1	P32597	No	No	31.5	28.4135	28.5007	28.7083	28.1721	15.2415	28.5145	28.8423	28.5213	28.5026	12.0657	28.7456	28.5388	28.6609	28.6542	5.83871	28.5753	28.4498	28.5063	28.6576	6.24739	28.3684	28.698	28.4311	12.4657	0.146478	0.330252	0.201229	0.14136	0.0985809	0.441753	0.050481	0.759632	1019.87	1083.42	1251.06	58.424	1093.77	1372.8	1098.94	1084.79	1283.81	1112.4	1210.64
STF2	YGR008C	ATPase-stabilizing factor 15 kDa protein	P16965	No	No	71.4	27.8897	27.9488	28.0774	28.4336	17.8674	30.6839	30.253	30.459	30.5507	12.3247	29.7141	29.8386	29.7716	29.7514	3.64249	28.6059	28.8399	28.7444	28.8731	8.13243	27.721	27.7972	27.9873	9.66537	2.3993	4.07418e-06	1.68155	1.02888e-05	0.678446	0.00246374	-0.252213	0.172904	11563.8	12047.4	13171.4	1141.8	80216.9	59504.6	68637.7	73139.2	40956.6	44646.6	42619.6
STF1	YDL130W-A	ATPase-stabilizing factor 9 kDa, mitochondrial	P01098	No	No	79.1	27.0056	25.5263	26.5006	25.4679	52.0508	28.3802	28.2403	28.119	28.3543	8.14799	28.7682	28.9855	29.0123	28.9675	7.46136	28.6801	28.6729	28.6551	28.397	9.02115	28.2203	27.9302	28.4695	18.4976	2.14831	0.00134816	2.80824	0.000320787	2.47616	0.000652073	2.08152	0.0065344	5987.02	2147.36	4218.96	139.65	15523.9	14089.1	12952.9	15247.5	20313.8	23617.1	24058.7
STE7	YDL159W	Serine/threonine-protein kinase STE7	P06784	No	No	8		25.6123							25.5735																-0.0387973									397.394						386.849
STE50	YCL032W	Protein STE50	P25344	No	No	15.6	24.1349																		24.3115										0.17654				211.351
STE20	YHL007C	Serine/threonine-protein kinase STE20	Q03497	No	No	31.4	28.3219	28.6564	28.6617	28.5111	10.7464	28.3905	28.0727	28.2903	27.9618	13.5379	28.3329	28.281	28.344	28.4292	4.29355	28.2305	28.27	28.3638	28.3174	4.01094	27.9011	28.3922	28.4173	18.8939	-0.358955	0.0297382	-0.191019	0.0672885	-0.242329	0.0291881	-0.300894	0.135989	1465.59	1848.04	1854.81	113.159	1536.92	1233.09	1433.79	1141.89	1476.77	1424.58	1488.22
STE13	YOR219C	Dipeptidyl aminopeptidase A	P33894	No	No	7.1																					22.9685
STE11	YLR362W	Serine/threonine-protein kinase STE11	P23561	No	No	16.5							25.0669															25.3979	26.0815	32.8885														194.668
STB6	YKL072W	Protein STB6	P36085	No	No	9														23.8262
STB3	YDR169C	Protein STB3	Q12427	No	No	40.7	26.9882		26.3829	27.2361	28.3486	26.9152	26.2034		26.8554	24.9918	27.0951		27.0134	26.6255	16.5476	27.0916	27.0652	27.0586	27.0679	1.00309	26.9222	27.0739	27.2952	13.1267	-0.211014	0.569366	0.0422653	0.891864	0.201788	0.385244	0.228032	0.454451	1057.84		695.382	85.0719	1005.71	614.034		964.864	1139.21		1076.51
STB1	YNL309W	Protein STB1	P42845	No	No	16.7	24.9793		24.5916		18.8924	25.256	24.6135	23.9713	24.3578	39.1864	25.008	24.9265	25.0791	25.0136	4.31522	24.8196	24.6884	25.279	25.1379	18.8857	25.0059	24.6735	24.4627	19.2765	-0.235772	0.606098	0.221346	0.157952	0.19579	0.455612	-0.0714105	0.793809	323.721		247.422		392.15	251.219	160.965	210.418	330.219	312.074	346.896
SSZ1	YHR064C	Ribosome-associated complex subunit SSZ1	P38788	No	No	80.5	33.603	33.8305	33.7	33.5565	8.52663	33.3334	33.3631	33.3696	33.3594	1.09631	33.3251	33.2605	33.2632	33.2515	2.36214	33.3378	33.3847	33.3228	33.4111	2.84285	33.291	33.2577	33.1788	3.96427	-0.316138	0.00206419	-0.397415	0.000732471	-0.308398	0.00292977	-0.429966	0.00252322	100164	117276	107127	6568.1	83089.8	84817.1	85201	84602.2	82613.8	78997.8	79143.7
SSU72	YNL222W	RNA polymerase II subunit A C-terminal domain phosphatase SSU72	P53538	No	No	40.8																					26.3127	26.4761		8.00054
SSS1	YDR086C	Protein transport protein SSS1	P35179	No	No	47.5	28.0919	30.2255	27.9334	29.6952	72.4912	30.645	30.8394	30.7919	30.7917	5.71583	30.1776	30.0734	30.3189	30.7272	21.0937	30.7138	30.54	30.1258	30.5253	16.2884	30.4482	30.344	30.0256	14.7033	1.78051	0.0212168	1.3378	0.0642809	1.48976	0.0441617	1.28612	0.120029	14301.9	62758.6	12813.7	2942.86	83934.8	96047.6	92933.2	92923.2	60709	56479.8	66957.9
SSQ1	YLR369W	Heat shock protein SSQ1, mitochondrial	Q05931	No	No	25.6	27.6641	28.2547	26.9857	27.5166	36.4724	27.1073	26.9195	27.3945	27.1762	13.6873	27.521	26.7108	27.7455	27.623	27.731	27.5491	27.1477	27.4471	27.67	14.8258	26.9855	26.9658	27.1159	5.73932	-0.4559	0.153056	-0.20517	0.579823	-0.151763	0.612048	-0.582841	0.119999	1314.02	1978.7	821.048	80.3403	893.274	784.225	1090.06	936.955	1189.9	678.636	1390.33
SSP120	YLR250W	Protein SSP120	P39931	No	No	35		25.6679		26.6964	48.3796	26.9208	26.8157	26.859	27.0386	6.81762	27.1511	27.5208	27.2699	27.5403	13.0697	27.0716	27.1697	27.1565	27.2732	5.75474	26.7266	26.8367	27.2212	18.6513	0.726358	0.0878957	1.18836	0.0264331	0.985591	0.0372671	0.745998	0.180735		873.414		120.663	2081.55	1935.24	1994.22	2258.65	2441.82	3155	2651.37
SSO2	YMR183C	Protein SSO2	P39926	No	No	38.3	29.1135	28.7016	28.987	28.872	11.9996	29.1242	29.0857	29.3527	29.4516	12.3116	29.5133	29.5774	29.6881	29.5941	5.03979	29.3687	29.777	29.7859	29.7016	12.7908	29.2256	29.3969	29.3623	6.17948	0.33501	0.0359587	0.674684	0.000384068	0.739752	0.00135809	0.409702	0.0148338	7698.13	5786.26	7051.74	440.976	7755.52	7551.15	9086.08	9730.89	10156.5	10617.6	11464.1
SSO1	YPL232W	Protein SSO1	P32867	No	No	33.4	27.3063	28.2852	27.7289	28.0269	27.9113	28.1227	27.8104	27.7186	27.885	12.3732	28.2258	28.4342	28.0531	28.4209	12.2171	28.0381	28.179	27.8647	27.9173	9.83844	28.1524	27.4985	27.901	22.1372	0.0473701	0.841811	0.446686	0.0987601	0.162966	0.489696	0.0138321	0.964464	2241.28	4417.46	3004.17	250.121	3946.95	3178.65	2982.83	3347.47	4239.47	4898.24	3760.99
SSL2	YIL143C	DNA repair helicase RAD25	Q00578	No	No	10.6																							25.6933
SSK2	YNR031C	MAP kinase kinase kinase SSK2	P53599	No	No	8.4			27.3056	26.5248	37.358		25.5568		26.2829	34.8569	26.7443		26.2991	26.2307	20.2074	25.8923	26.4114	26.1628	26.5453	19.3505		26.5652	26.3653	9.78027	-0.995391	0.202843	-0.49051	0.263741	-0.662252	0.10899	-0.449978	0.380275			410.812	16.1941		122.236		202.201	278.415		204.487
SSK1	YLR006C	Osmolarity two-component system protein SSK1	Q07084	No	No	8														25.3387
SSH1	YBR283C	Sec sixty-one protein homolog	P38353	No	No	18.2	27.6007		26.8826	27.5974	25.9889	27.1454		27.3986	27.1659	10.0009							27.1984				27.4257	27.6846	27.0853	20.4338	-0.123632	0.649716			-0.161804		0.0382808	0.903085	1706.99		1037.66	115.335	1244.98		1483.83	1262.76
SSF1	YHR066W	Ribosome biogenesis protein SSF1	P38789	No	No	11.7	27.173	26.6686	27.5464	26.9489	26.0916	26.7769	26.5216	26.6232	26.6684	7.34849		26.5271		27.146	29.8772		26.7904				25.8068	26.5109	26.507	25.5275	-0.436664	0.0641363	-0.247687	0.502563	-0.293803		-0.80931	0.0402073	1307	921.344	1693	75.7792	993.206	832.112	892.841	921.257		835.273
SSE2	YBR169C	Heat shock protein homolog SSE2	P32590	No	No	60.3	27.2626	28.3508	28.4574	28.3628	31.6258	29.8262	29.7392	29.8331	29.9862	7.23064	29.9389	30.1334	30.1169	30.1987	7.49826	29.9796	30.2405	30.0899	29.9978	8.45609	29.9133	30.1045	29.9947	6.67997	1.73781	0.000928713	1.98862	0.000459019	1.96859	0.000492177	1.89579	0.00248987	927.423	1971.78	2122.98	134.649	5482.75	5162.09	5509.24	6125.8	5928.23	6784.17	6706.99
SSE1	YPL106C	Heat shock protein homolog SSE1	P32589	No	No	74.3	34.3567	34.5921	34.5397	34.4837	6.88969	34.4774	34.2076	34.3538	34.3827	7.64592	34.1209	34.1366	34.1938	34.163	2.22085	34.187	34.0274	34.1258	34.1356	4.56901	34.2097	33.9689	34.0983	8.31699	-0.137632	0.117574	-0.339428	0.000684355	-0.374064	0.00082794	-0.400723	0.00487546	127127	149659	144320	9401.88	138228	114650	126878	129439	107964	109143	113558
SSD1	YDR293C	Protein SSD1	P24276	No	No	51	29.8121	30.0512	30.0245	29.8923	7.73837	30.0995	30.1583	30.111	30.0525	3.0141	30.3269	30.2471	30.2545	30.1928	3.83395	30.2561	30.4249	30.1881	30.3259	7.05734	30.2465	30.3313	30.4251	6.20031	0.160306	0.0376946	0.310315	0.00257213	0.353756	0.00341682	0.389286	0.00445525	3011.33	3554.07	3488.9	215.6	3675.15	3828.17	3704.54	3557.26	4302.58	4070.97	4092.05
SSC1	YJR045C	Heat shock protein SSC1, mitochondrial	P0CS90	No	No	72.6	34.1054	34.3076	34.2835	34.2128	6.18615	34.0977	33.9257	34.0353	34.0285	4.88913	33.7647	33.6961	33.7992	33.6675	4.2049	33.952	33.8271	33.8279	33.8294	4.38505	33.9551	33.8704	33.9509	3.27737	-0.205519	0.0118826	-0.495445	0.000100035	-0.368215	0.000534694	-0.301849	0.00356182	116998	134602	132374	8535.57	116377	103292	111452	110927	92385.2	88099.6	94626.1
SSB2	YNL209W	Heat shock protein SSB2	P40150	No	No	5.9	36.5356	36.3972	36.5718	36.3375	7.6809	35.707	35.5339	35.599	35.6713	5.30931	35.2777	35.2437	35.4322	35.3279	5.77981	35.2619	35.1812	35.2589	35.0814	5.79738	35.2557	35.0934	35.2754	6.78554	-0.832715	1.75496e-05	-1.14017	3.17636e-06	-1.26469	1.85101e-06	-1.25232	2.13303e-05	668775	607606	685740	39480.9	376566	334001	349409	367368	279647	273128	311255
SSB1	YDL229W	Heat shock protein SSB1	P11484	No	No	5.7	31.6601	31.9546	31.516	32.0112	16.1371	31.0705	30.9068	30.9512	30.6209	12.6772	29.9018	30.1898		30.131	10.2616	30.2782	30.0976	30.2768	30.0423	8.40613	30.5561	30.4674	30.3244	8.02104	-0.898143	0.00104134	-1.71128	0.000116694	-1.61176	1.92339e-05	-1.33617	0.000305455	22780.6	27938.9	20615	1967.79	15137.9	13514.7	13936.2	11084.5	6733.83	8221.44
SSA4	YER103W	Heat shock protein SSA4	P22202	No	No	46.7	26.4553	25.8341	27.0792	26.3249	36.4552	30.3707	30.5423	30.5183	30.894	16.1039	30.8364	30.8814	31.1958	31.028	11.4805	31.1077	31.4657	31.4936	31.0631	15.7385	31.0716	31.0513	30.8109	9.75029	4.15796	5.77435e-06	4.562	2.67714e-06	4.85916	2.37659e-06	4.55458	2.69055e-05	590.646	383.974	910.172	36.5427	8911.71	10037.6	9872.02	12808.8	12306.8	12697.1	15788.5
SSA2	YLL024C	Heat shock protein SSA2	P10592	No	No	27.5	34.1913	34.4679	34.1804	34.316	9.50827	33.6814	33.8287	33.704	33.7506	4.55787	33.6473	33.5649	33.9179	33.74	10.7098	33.7449	33.5606	33.5597	33.6912	6.52539	33.3919	33.1487	33.3229	8.53367	-0.547729	0.000326505	-0.571386	0.00132512	-0.649799	0.000212979	-1.00107	0.000169123	126246	152929	125294	9321.61	88660.7	98185.8	90057.2	93017.7	86588.3	81780.7	104448
SSA1	YAL005C	Heat shock protein SSA1	P10591	No	No	33	36.3989	36.3411	36.4688	36.2372	6.73416	36.5638	36.2691	36.3301	36.3292	9.37666	36.3428	36.4494	36.3607	36.4133	3.39078	36.2509	36.3048	36.2394	36.1761	3.6541	36.1644	36.0444	36.1735	4.92167	0.0115452	0.892022	0.0300686	0.602447	-0.118704	0.0768688	-0.234065	0.0179883	581583	558713	610435	35209.4	652001	531511	554490	554131	559400	602277	566384
SRY1	YKL218C	Threo-3-hydroxyaspartate ammonia-lyase	P36007	No	No	78.2	27.0029	26.9473	26.5653	27.0029	13.5977	26.4543	27.7462	27.8094	27.2591	37.2196	28.1461	27.8494	27.8535	27.7858	11.7178	28.3562	28.4772	28.1039	28.3105	10.5471	28.6549	28.8057	28.7859	5.59054	0.437665	0.233194	1.0291	0.000243264	1.43236	3.49367e-05	1.86926	3.0527e-05	1722.96	1657.75	1272.13	116.683	1177.98	2884.29	3013.29	2057.72	3805.4	3098.1	3106.82
SRX1	YKL086W	Sulfiredoxin	P36077	No	No	35.4
SRV2	YNL138W	Adenylyl cyclase-associated protein	P17555	No	No	64.3	30.4246	30.4264	30.732	30.2764	13.7665	30.5082	30.9229	30.6061	30.6786	12.6648	30.8628	30.607	30.7509	30.7899	7.33072	30.8593	30.6613	30.853	30.9999	9.51042	30.7097	30.7949	30.7089	3.45835	0.214093	0.151617	0.287814	0.0395362	0.378519	0.0186179	0.272983	0.0648843	11202	11216	13861.8	684.567	11870.5	15822.9	12703.7	13358.2	15177.8	12711.5	14045.3
SRS2	YJL092W	ATP-dependent DNA helicase SRS2	P12954	No	No	4.9			27.7138			27.0909	27.3763	26.1447		39.2277	27.2611	27.9889	27.9079	28.3217	28.3198	27.4785	27.3833		27.4864	3.93302					-0.84313		0.156099		-0.26438						732.828		475.89	579.99	246.977		535.447	886.764	838.36
SRP72	YPL210C	Signal recognition particle subunit SRP72	P38688	No	No	35.9	27.7611	27.9708	27.4123	27.6599	15.9071	27.625	28.0339	27.8319	27.7808	11.8256	27.9636	27.4537	27.7907	27.8197	14.2501	27.8754	27.6637	27.8377	28.29	19.4083	27.7326	28.3365	28.2522	21.1399	0.116866	0.446313	0.0558926	0.736275	0.215683	0.266895	0.40609	0.109989	1382.93	1599.24	1085.94	87.3106	1258.42	1670.8	1452.48	1401.9	1591.28	1117.55	1411.56
SRP68	YPL243W	Signal recognition particle subunit SRP68	P38687	No	No	36.6	27.814	28.4183	27.9588	28.0144	18.9771	27.6954	27.8653	27.8784	27.9694	7.76573	27.6839	27.8146	27.4203	27.6663	11.0727	27.8411	27.6161	27.5792	28.0207	14.5597	27.9604	28.0681	28.0464	3.91237	-0.199226	0.208698	-0.405067	0.0384609	-0.287069	0.133566	-0.0263798	0.872001	1528.82	2324.27	1690.22	118.963	1408.18	1584.22	1598.6	1702.79	1397.04	1529.47	1163.72
SRP54	YPR088C	Signal recognition particle subunit SRP54	P20424	No	No	38.3	28.888	28.7796	28.7962	28.3303	15.9775	28.7627	28.5317	28.4514	28.3711	12.0879	27.4151	28.1726	27.8306	27.8775	20.9224	27.5559	27.8863	27.7549	27.5493	11.4965	27.9816	27.9449	27.7491	8.4608	-0.169311	0.304724	-0.874542	0.00468784	-1.01191	0.000507406	-0.806642	0.00394092	3725.06	3455.49	3495.3	171.385	3415.22	2909.82	2752.27	2603.27	1342.02	2268.76	1789.83
SRP40	YKR092C	Suppressor protein SRP40	P32583	No	No	16	28.3679	28.7351	28.4722	28.3781	12.4001	27.4696	27.7905	27.5272	27.751	11.0277	27.3506	27.3224	27.2373	27.5951	11.0336	27.5404	27.2138	27.0226	27.2899	15.0545	26.804	27.1012	27.5587	26.8124	-0.853768	0.000338485	-1.11198	7.00025e-05	-1.22165	0.000111443	-1.33368	0.00142004	3776.13	4870.67	4059.22	257.545	2026.01	2530.61	2108.42	2462.26	1865.55	1829.47	1724.61
SRP21	YKL122C	Signal recognition particle subunit SRP21	P32342	No	No	49.7	28.4253	28.1349	28.0618	27.5849	22.9964	28.1642	27.8165	27.4249	27.6	22.7668	28.1585	27.866	28.0135	28.2678	11.9988	28.012	28.0079	28.1823	27.7593	11.8264	27.9922	28.0053	28.3511	14.6297	-0.300303	0.250384	0.0247176	0.903249	-0.0613367	0.76355	0.0645131	0.788955	8746.78	7152.29	6798.74	330.835	7299.1	5735.91	4372.42	4936.35	7270.22	5935.86	6575.01
SRP14	YDL092W	Signal recognition particle subunit SRP14	P38985	No	No	72.6	27.2895	27.4491	25.3139	27.6304	49.5031	27.3405	27.4569	26.9496	27.1385	15.2619	27.0261	28.0341	27.3862	28.0913	33.7578	27.2602	27.5533	27.3598	27.6492	12.258	27.2776	27.2668	26.9692	11.6829	0.300645	0.605369	0.713699	0.278207	0.53492	0.366162	0.250474	0.713601	4463.86	4986.06	1135.04	382.893	4624.42	5013.28	3526.95	4020.31	3719.07	7479.5	4773.27
SRP102	YKL154W	Signal recognition particle receptor subunit beta	P36057	No	No	27.5			25.6621				27.1142		26.7343	18.5123	26.5213	26.888	26.2655	26.9357	21.2275	26.8874	26.9775	26.5869	27.0389	13.1735	27.1123	27.1566	26.8171	12.3186	1.26215		0.990568		1.21061		1.36661				880.05			2407.85		1850.43	1596.52	2058.45	1337.09
SRP101	YDR292C	Signal recognition particle receptor subunit alpha homolog	P32916	No	No	30.4	27.6121	27.6966	27.1902	27.7897	17.0099	27.6669	27.8407	27.9555	28.0695	11.7374	27.7654	27.7347	28.7897	28.2148	36.6376	27.9328	27.9644	28.0288	28.3702	14.7983	27.8285	27.2557	26.8843	33.5879	0.31103	0.0962219	0.554031	0.0953322	0.501902	0.0234785	-0.249327	0.411034	1323.98	1403.81	988.257	101.407	1375.22	1551.34	1679.77	1817.95	1472.42	1441.44	2994.78
SRP1	YNL189W	Importin subunit alpha	Q02821	No	No	45.2	30.1461	30.5925	30.1699	30.2937	14.9239	30.1391	30.1029	30.2452	30.2646	5.47227	30.0724	29.9541	29.921	29.9916	4.56327	29.9863	29.9507	30.1513	29.8844	8.05234	30.4559	30.6394	30.4636	7.33368	-0.112593	0.345166	-0.315787	0.0261186	-0.307356	0.0394789	0.219092	0.155997	8789.35	11976.1	8935.07	659.359	8746.45	8529.71	9414.41	9541.64	8351.44	7693.82	7519.25
SRO9	YCL037C	RNA-binding protein SRO9	P25567	No	No	68.4	31.1161	31.4761	31.2926	31.4089	10.6708	30.6638	30.3667	30.6331	30.5124	9.16424	29.8156	29.7841	30.2132	29.9482	14.1091	29.784	29.4399	29.7392	29.4927	11.9325	29.7709	29.1633	29.7867	22.6878	-0.779405	0.000288483	-1.38316	3.31816e-05	-1.70948	6.43533e-06	-1.74977	0.000289518	21652.8	27788.1	24469.7	1796.33	15825.4	12880	15492.3	14248.5	8790.43	8600.46	11579.5
SRO7	YPR032W	Lethal(2) giant larvae protein homolog SRO7	Q12038	No	No	13.6	28.8561	29.4875	29.2665	29.4205	18.223	29.1232	28.8436	29.4943	28.9167	21.2851	29.5858	29.6159	29.8404	29.9908	13.4925	28.976	29.2786	28.9523	28.5301	20.6501	27.8929	28.7101	28.1717	29.6682	-0.163191	0.452733	0.500604	0.026454	-0.323394	0.17292	-0.999404	0.012337	1897.15	2938.77	2521.47	189.994	2283.06	1880.79	2952.75	1978.52	3146.17	3212.47	3753.31
SRN2	YLR119W	Protein SRN2	Q99176	No	No	35.2																26.0331			26.0365	0.163543
SRM1	YGL097W	Guanine nucleotide exchange factor SRM1	P21827	No	No	49	29.6326	29.4318	29.789	29.4991	11.1069	29.5769	29.6319	29.493	29.4866	4.87219	29.6505	29.7556	29.9889	29.8382	9.99366	29.7225	29.7859	29.7842	29.8489	3.57846	29.6407	29.6361	29.6246	0.57764	-0.041039	0.651192	0.220182	0.0839856	0.197272	0.055034	0.045682	0.64561	7019.93	6107.49	7823.41	433.377	6753.68	7016.14	6372.48	6343.97	7107.3	7644.61	8986.07
SRL2	YLR082C	Protein SRL2	Q12020	No	No	16.1
SRC1	YML034W	Inner nuclear membrane protein SRC1	Q03707	No	No	19.7	26.6477	28.0654	27.4118	26.5288	51.6053	26.9383	28.4022	27.2363	27.8464	45.9075	28.0046	26.9546	27.79	27.3204	31.3581	27.6957	27.4049	27.3353	27.3662	12.0891	27.2119	27.6688	27.1293	21.0629	0.442359	0.396525	0.353995	0.441095	0.287105	0.465116	0.173242	0.714295	492.245	1315.03	835.937	30.6988	602.081	1660.82	740.194	1129.81	1260.76	608.916	1086.55
SRB7	YDR308C	Mediator of RNA polymerase II transcription subunit 21	P47822	No	No	22.9				27.0696		27.1042			26.3523	36.0388															-0.341318											265.366	4013.58			2383.42
SRB6	YBR253W	Mediator of RNA polymerase II transcription subunit 22	P32570	No	No	19.8	24.4031																																715.486
SRB5	YGR104C	Mediator of RNA polymerase II transcription subunit 18	P32585	No	No	15.3
SRB4	YER022W	Mediator of RNA polymerase II transcription subunit 17	P32569	No	No	11.5			25.4285									26.4759		26.2747	9.84181	25.9267			25.5398	18.8487		25.5891					0.946812		0.304801		0.160616				257.278							531.733
SRB2	YHR041C	Mediator of RNA polymerase II transcription subunit 20	P34162	No	No	20.5																					26.2823	26.2356		2.28741
SQT1	YIR012W	Ribosome assembly protein SQT1	P35184	No	No	23.2	27.2698	27.4723	27.6845	27.3141	13.3669	26.4994	27.1132	26.5962	26.8728	19.6216	26.8559	26.6333	27.0285	26.8168	11.2059	26.4783	27.2611	27.2124	27.7362	33.5643	26.9807	27.5752	27.2394	20.821	-0.66477	0.00740866	-0.60153	0.00284625	-0.263166	0.377265	-0.170077	0.392445	1533.92	1765.02	2044.65	107.116	899.24	1376.09	961.661	1164.89	1151.34	986.686	1297.7
SQS1	YNL224C	Protein SQS1	P53866	No	No	6.8	24.8167																																151.952
SPT8	YLR055C	Transcription factor SPT8	P38915	No	No	12.1	26.7902	26.3294	26.073	26.3717	21.3711				25.9096				26.4606												-0.481446		0.0695356						783.895	569.565	476.849	39.7211				425.783			623.807
SPT7	YBR081C	Transcriptional activator SPT7	P35177	No	No	7.1	27.5887	27.688	27.8243		8.24196		27.8537	27.8413	27.5524	11.3907							28.4033		28.3141	4.36937	28.0247	28.1509		6.18062	0.0488446	0.70433			0.658416	0.00601245	0.387519	0.0303468	591.311	633.437	696.186			710.54	704.476	576.635
SPT6	YGR116W	Transcription elongation factor SPT6	P23615	No	No	37.1	29.6719	30.1177	29.8565	29.7999	13.3931	29.8137	30.1617	30.0162	30.0892	10.0841	30.1907	30.0624	30.0776	29.9432	7.00601	30.2554	30.1782	30.0222	30.2769	7.78625	29.9997	30.1357	29.8733	9.09988	0.158706	0.234194	0.206994	0.0999761	0.321672	0.0265235	0.14138	0.318696	2272.4	3095.04	2582.51	168.162	2507.01	3190.95	2884.9	3034.47	3255.77	2978.68	3010.29
SPT5	YML010W	Transcription elongation factor SPT5	P27692	No	No	43.9	30.3289	30.7238	30.5489	30.5824	11.0949	30.2784	30.4047	30.272	30.3001	4.36259	30.2985	30.1635	30.2961	30.1848	4.95908	30.1926	30.0803	30.1364	30.1975	3.78871	29.8527	29.9238	30.0168	5.72198	-0.232196	0.0375746	-0.310223	0.0131725	-0.394273	0.00379501	-0.614884	0.00201413	5213.97	6855.44	6072.59	420.912	5034.59	5495.02	5012.17	5110.75	5105.34	4649.16	5096.83
SPT3	YDR392W	Protein SPT3	P06844	No	No	11.9
SPT20	YOL148C	Transcription factor SPT20	P50875	No	No	27.2	27.2473		26.2106		48.7319	27.1856	27.5413	27.5024	27.8786	19.7218	26.5425	27.0301		27.5968	36.4426			27.5015	26.8009	33.677	27.0628	27.0222	27.1548	4.74656	0.798038	0.104954	0.327585	0.594206	0.422305	0.569231	0.35102	0.434063	1050.6		512.111		1006.61	1288.08	1253.85	1627.37	644.612	903.803
SPT2	YER161C	Protein SPT2	P06843	No	No	11.1																						25.4629
SPT15	YER148W	TATA-box-binding protein	P13393	No	No	40.4	28.1456	28.3794	28.6612	28.6677	16.7927	28.0872	28.0109	27.2867	27.8052	22.7216	27.2914	27.5001	27.2611	27.8177	18.599	27.6443	27.8332	27.918	27.7453	8.10629	27.6467	27.6613	27.6996	1.89922	-0.665995	0.0230702	-0.995919	0.00144378	-0.678295	0.00271968	-0.79432	0.00311463	4916.66	5781.61	7028.7	478.132	4721.62	4478.23	2710.74	3883.16	2719.69	3142.89	2663.23
SPP41	YDR464W	Protein SPP41	P38904	No	No	10.7			26.7429	25.9591	37.5011	26.5679	26.8803	26.6697	26.1288	20.7022	26.6807	26.8114	27.0236	27.374	21.8247		27.2934	27.2614	27.388	4.604		27.8134			0.210675	0.566422	0.621442	0.133129	0.963283	0.0474185	1.46237				310.725	12.2221	275.231	341.767	295.342	203.002	297.611	325.831	377.457
SPP381	YBR152W	Pre-mRNA-splicing factor SPP381	P38282	No	No	18.6																					25.5219
SPP2	YOR148C	Pre-mRNA-splicing factor SPP2	Q02521	No	No	12.4			25.6496																																1139.76
SPO14	YKR031C	Phospholipase D1	P36126	No	No	2.7						29.2381	29.598		29.1895	16.0549								29.0755																			1450.31	1861.21		1402.23
SPN1	YPR133C	Transcription factor SPN1	Q06505	No	No	62.9	29.1774	29.0155	29.0483	29.0884	4.91105	29.2291	29.0879	29.0597	29.0791	5.51708	29.4134	29.3777	29.2068	29.219	7.38875	29.4192	29.3678	29.3617	29.6023	8.06736	29.5619	29.5844	29.4375	5.40319	0.0315531	0.568269	0.221834	0.0131489	0.355351	0.00173327	0.445511	0.000521359	5890.36	5265.06	5385.95	375.046	6105.27	5535.85	5428.83	5502.47	6937.13	6767.63	6011.54
SPF1	YEL031W	Manganese-transporting ATPase 1	P39986	No	No	45.8	30.8573	31.1733	31.1146	30.895	10.8871	31.1153	31.4961	31.3625	31.2351	11.3837	31.4688	31.3768	31.4132	31.4887	3.5422	31.3027	31.0856	31.2468	31.2185	6.26711	31.1426	31.3291	31.2869	6.66986	0.292199	0.0421864	0.426825	0.00208779	0.203304	0.0670976	0.242815	0.0673867	6429.6	8003.53	7684.91	446.956	7688.55	10011.1	9125.65	8353.89	9823.38	9216.54	9451.54
SPE3	YPR069C	Spermidine synthase	Q12074	No	No	85.7	32.3938	32.1626	32.3986	32.1409	9.7744	31.5714	31.9398	31.8091	31.808	10.3527	31.5662	31.5591	31.5055	31.4587	3.47213	31.4542	31.6956	31.5944	31.7035	7.87685	31.4746	31.6466	31.524	6.20744	-0.491911	0.00327777	-0.751574	5.75109e-05	-0.662058	0.000354522	-0.725584	0.000581699	75708.4	64498.8	75960.6	4302.79	42812.3	55266.9	50481.2	50445	42660.7	42451.4	40903.1
SPE2	YOL052C	S-adenosylmethionine decarboxylase proenzyme;S-adenosylmethionine decarboxylase alpha chain;S-adenosylmethionine decarboxylase beta chain	P21182	No	No	25			24.5641				24.961																		0.396908										239.871			315.834
SPC42	YKL042W	Spindle pole body component SPC42	P36094	No	No	30	26.6037										26.4893		27.6182	26.8446	41.6864	26.682		26.7104	27.1778	20.2236		26.1953	26.5264	16.1573			0.380303		0.253043		-0.242845		1078.63								996.36		2179.04
SPC34	YKR037C	DASH complex subunit SPC34	P36131	No	No	14.6								26.3114				26.5345																											1092.62			1275.34
SPC3	YLR066W	Signal peptidase complex subunit SPC3	Q12133	No	No	29.3		24.8414		25.529	33.0776	25.4307	27.1446	26.3895		55.2316		25.9639		27.0796	52.1101		26.8022	26.8726	26.658	7.48372	25.5794		26.6082	48.391	1.13635	0.197956	1.33652	0.17821	1.59234	0.00962284	0.908591	0.279701		629.563		68.6691	947.151	3107.19	1840.96			1370.71
SPC25	YER018C	Kinetochore protein SPC25	P40014	No	No	24.4																						25.0172	25.5093	23.8892
SPC24	YMR117C	Kinetochore protein SPC24	Q04477	No	No	7							25.0959																															651.678
SPC2	YML055W	Signal peptidase complex subunit SPC2	Q04969	No	No	34.8	25.5908	26.2597	26.5797	26.2017	26.5267	26.8326	27.3617	26.9371	26.9031	17.7807	27.5815	26.8762	27.9468	27.1531	32.7421	27.5946	27.303	27.1796	27.4435	12.4613	27.9467	28.2218	28.0718	9.57605	0.850641	0.0118771	1.23142	0.00772108	1.22219	0.00161844	1.92212	0.000630587	1086.12	1726.78	2155.73	112.339	2568.61	3706.65	2761.61	2697.35	4316.62	2647.49	5560.63
SPC19	YDR201W	DASH complex subunit SPC19	Q03954	No	No	17.6	25.4145		24.9184		24.0775							26.0421	25.5321		24.7387			25.1231									0.620654	0.223151	-0.0433429				1057.45		749.767							1633.76	1147.28
SPC110	YDR356W	Spindle pole body component 110	P32380	No	No	20.7	29.908	30.7238	30.0397	30.4295	26.1834	30.1564	30.3861	30.4509	30.2495	9.14724			30.9323				30.0452		30.3626	15.4975	29.5605	30.2618		33.7144	0.035486	0.863344	0.657093		-0.0713356	0.821117	-0.364118	0.359531	4029.37	7092.79	4414.54	391.711	4786.52	5612.47	5870.46	5105.7			8195.92
SPC1	YJR010C-A	Signal peptidase complex subunit SPC1	P46965	No	No	22.3	24.5022	25.3093			38.5565		25.581		25.0699	24.79	25.2617	24.7022			27.0838	24.589		25.0596	25.4679	29.8223		25.2228			0.419675	0.472263	0.0762378	0.890867	0.133094	0.784354	0.317056		982.003	1718.17				2074.18		1455.46	1662.46	1128.05
SPB4	YFL002C	ATP-dependent rRNA helicase SPB4	P25808	No	No	11.6			25.2711																																260.782
SPB1	YCL054W	27S pre-rRNA (guanosine(2922)-2-O)-methyltransferase	P25582	No	No	13.4	27.0598	25.822	26.4276	26.7089	33.9103	27.1948	26.0513	26.4601	26.2053	38.8223	26.5371	26.5809	26.7307	26.8977	11.5456	26.7439	26.4361	27.068	26.313	24.0852	26.5375	26.4009	26.1078	14.7823	-0.0266955	0.943962	0.182006	0.531424	0.135711	0.678307	-0.155837	0.654062	648.278	274.881	418.257	34.4226	711.855	322.239	427.789	358.522	451.227	465.148	516.027
SPA2	YLL021W	Protein SPA2	P23201	No	No	47.3	29.1862	29.2164	29.1181	29.5206	12.9814	29.0535	29.4217	29.2686	29.223	10.4563	29.4051	29.2408	29.4501	29.314	6.44616	29.3515	29.1908	29.3397	29.4343	6.9067	29.2956	29.054	29.4328	13.031	-0.0186115	0.878835	0.0922056	0.395029	0.0687533	0.527499	0.000487687	0.997363	1673.99	1709.39	1596.87	142.938	1526.87	1970.84	1772.43	1717.29	1948.34	1738.63	2009.98
SOP4	YJL192C	Protein SOP4	P39543	No	No	14.5	25.7923		26.1274		16.352		26.0449	26.111	25.877	8.21884	25.8742	25.9535	26.2108	26.3651	15.8587	26.5653	26.5246	26.2729	26.5516	9.13451	26.2119	26.1904	26.1788	1.16808	0.0511219	0.761611	0.141037	0.517558	0.518744	0.0236535	0.233834	0.159372	976.826		1232.25			1163.75	1218.33	1035.9	1033.88	1092.31	1305.58
SOL4	YGR248W	6-phosphogluconolactonase 4	P53315	No	No	40						26.6702	27.4678	27.1442	27.3105	22.1657	27.4087	27.6267	27.3336	27.3868	9.26595	27.0401	27.2598	27.5683	27.3526	15.1428	27.0752	26.9882	26.9453	4.62169													1678.39	2917.34	2331.26	2616.05	2800.25	3256.98	2658.33
SOL3	YHR163W	6-phosphogluconolactonase 3	P38858	No	No	69.9	29.8378	30.0535	29.9235	30.0492	7.17132	29.7489	30.1183	29.832	29.8988	11.298	30.3244	30.0307	30.2272	30.1991	8.31969	30.3522	30.0747	30.0979	30.2515	9.18885	29.9331	30.0415	29.7885	8.7347	-0.0665076	0.509382	0.229331	0.0291328	0.228038	0.0348396	-0.0449456	0.627863	15441.2	17931.1	16386.3	1210.74	14518.6	18755	15378.8	16107.9	21635.4	17649.5	20225.8
SOL2	YCR073W-A	6-phosphogluconolactonase-like protein 2	P37262	No	No	50.2	28.2172	28.1385	27.8581	27.5039	21.164	28.0974	28.2124	28.2787	28.3037	6.27777	28.4315	28.2726	28.5812	28.3252	9.60708	28.2611	28.2832	28.3657	28.2117	4.48628	27.9724	28.2222	28.3312	12.4329	0.293629	0.1309	0.473205	0.0355385	0.350969	0.0769766	0.245801	0.295942	4043.95	3829.22	3152.76	167.026	3721.53	4030.47	4219.93	4293.79	4691.5	4202.17	5204.28
SOL1	YNR034W	6-phosphogluconolactonase-like protein 1	P50278	No	No	33.6	24.2964															24.9091						25.269							0.612772		0.972607		258.372
SOK2	YMR016C	Protein SOK2	P53438	No	No	22.3	30.0189	29.1765	26.0877	30.05	68.2097	30.6802	31.6839	30.5367	29.5656	59.6252	30.7659	31.6182	28.1178	30.0953	77.4414	31.6061	30.0948	32.2126	32.0158	48.9196	27.8102	29.7794	30.3881	68.8328	1.78333	0.134925	1.31604	0.313927	2.64909	0.0455179	0.492656	0.717382	5679.38	3167.38	372.289	393.001	8981.87	18010.2	8131.45	4147.95	9531.59	17207.8	1520.57
SOK1	YDR006C	Protein SOK1	P40317	No	No	17.2	28.0076	28.1771	29.1944	27.9854	46.2784	28.1601	27.9296	28.5247	27.8425	22.1297	28.0269	27.8102	27.7373	27.338	19.0211	27.3376	27.7191	27.1867	27.4416	15.9894		26.9087	27.583	32.4581	-0.226902	0.511808	-0.613046	0.105236	-0.919913	0.0246478	-1.09528	0.0838475	1193.64	1342.43	2717.15	79.602	1326.73	1130.78	1708.18	1064.52	1209.69	1040.95	989.684
SOG2	YOR353C	Leucine-rich repeat-containing protein SOG2	Q08817	No	No	12.8	28.1301		28.1873		2.80054													27.9982				24.6599							-0.160435		-3.49881		1504.07		1564.84
SOF1	YLL011W	Protein SOF1	P33750	No	No	38.9	26.7981	27.4506	27.8294	27.4917	27.5046	25.8432	25.9308		26.3274	18.5879			26.5127	26.9001	18.8734	26.5507	27.2552	26.3242		35.4628	26.1085	26.222	25.7156	17.5567	-1.35863	0.00494071	-0.686016	0.117153	-0.682388	0.105969	-1.37705	0.00478428	918.705	1444.07	1877.64	100.627	473.949	503.607		662.949			753.828
SOD2	YHR008C	Superoxide dismutase [Mn], mitochondrial	P00447	No	No	72.1	29.5713	30.0724	29.4159	29.7469	20.179	29.4049	30.241	30.1908	30.0559	23.5699	29.6425	29.5686	29.3828	29.2877	11.2785	29.3338	29.6281	29.628	29.9249	16.7246	29.8897	30.3798	30.1439	16.876	0.271565	0.299724	-0.231219	0.205607	-0.072897	0.707915	0.436186	0.0860456	13837.5	19584.4	12424.4	1058.43	12330	22013	21260.1	19362.4	14537.6	13811.4	12143.2
SNZ1	YMR096W	Pyridoxine biosynthesis protein SNZ1	Q03148	No	No	58.2	26.646	26.3706	26.7456	26.0463	20.7376	26.1916	24.8566		26.0774	42.5024						27.514	27.4001	27.3519	27.1157	11.2621	28.6344	28.4713	28.2837	12.0889	-0.743577	0.124131			0.893331	0.00239211	2.01106	0.000182988	1475.61	1219.21	1581.14	65.9449	1076.93	426.901		994.983
SNX41	YDR425W	Sorting nexin-41	Q04053	No	No	9.4
SNX4	YJL036W	Sorting nexin-4	P47057	No	No	47	27.0263		26.9134	26.3944	21.813	27.1344	27.0327	26.9762	26.5989	15.1814	27.0696	26.9905	27.3056	27.0165	10.3825	27.3804	27.2051	27.121	27.3889	9.10075	27.4366	27.5448	27.3567	6.57333	0.157462	0.494133	0.317477	0.144485	0.49579	0.0405976	0.667953	0.0297719	1247.16		1153.27	54.505	1344.15	1252.63	1204.55	927.363	1285.11	1216.59	1513.49
SNX3	YOR357C	Sorting nexin-3	Q08826	No	No	77.2	27.6693	27.8332	27.7428	27.4192	11.8595	27.3818	27.1489	27.5228	27.5242	11.7615	27.5587	27.7602	27.5452	26.2969	36.3453	28.0637	27.9636	28.0605	28.4672	16.5184	27.9033	28.2306	28.2883	13.8049	-0.271707	0.0732652	-0.375848	0.31949	0.472636	0.0162527	0.474639	0.0222871	5084.33	5696.05	5350.17	289.539	4165.79	3544.78	4593.38	4597.91	4709.39	5415.2	4665.32
SNU71	YGR013W	U1 small nuclear ribonucleoprotein component SNU71	P53207	No	No	4.8
SNU66	YOR308C	66 kDa U4/U6.U5 small nuclear ribonucleoprotein component	Q12420	No	No	10.4		29.0393				29.1256	28.9578			8.21761			28.5653				29.0005	27.6568		61.477		29.2055	28.2151	46.7221	0.0023769		-0.474018		-0.710699		-0.328985			3713.16			3942.06	3509.1					2673.32
SNU56	YDR240C	56 kDa U1 small nuclear ribonucleoprotein component	Q03782	No	No	18.3																						24.2398
SNU13	YEL026W	13 kDa ribonucleoprotein-associated protein	P39990	No	No	71.4	29.7676	29.476	29.7727	29.4244	12.8105	28.8169	29.1702	28.8891	29.1128	11.7813	28.5759	28.5937	28.1437	28.2478	15.6591	28.6225	28.5757	28.6002	29.1503	20.8561	29.0195	29.4412	29.1587	15.1993	-0.612925	0.00283469	-1.21995	0.000168305	-0.873023	0.00192834	-0.403749	0.0443827	30116.3	24603.8	30222.8	1607.77	15581.6	19904.2	16381.3	19128.9	13183.8	13347.6	9770.89
SNU114	YKL173W	Pre-mRNA-splicing factor SNU114	P36048	No	No	15.1	27.2663	27.4602	27.2491	27.2451	7.44192				27.1202					26.8675		26.7575	26.6842	26.6264	26.7256	3.90111	26.9602	26.7172	26.6802	10.8246	-0.184971		-0.437678		-0.60675	4.98459e-05	-0.51929	0.00288815	632.887	723.921	625.359	42.2341				571.923
SNT1	YCR033W	Probable DNA-binding protein SNT1	P25357	No	No	11.6		27.5487	27.0405	27.1105	19.942				26.8891		27.0574					27.06	26.9085	27.6623		29.107					-0.344098		-0.175786		-0.0229635	0.93853				634.234	445.931	31.7004				401.512	451.197
SNQ2	YDR011W	Protein SNQ2	P32568	No	No	18.7	26.5413		26.607	27.3206	31.9542				27.2321							26.9403	28.2295			59.2917		26.9123	27.5547	30.9776	0.409187				0.76195	0.279341	0.410536	0.381688	258.738		270.784	30.0738				417.66
SNL1	YIL016W	HSP70 co-chaperone SNL1	P40548	No	No	45.9	27.6696	27.9983	28.1356	27.4336	21.5038	27.597	27.8594	27.4657	27.748	11.8726	28.1072	27.7219	27.9669	27.9083	10.9333	28.2396	27.8022	27.7902	28.3994	21.4759	27.9316	27.9616	27.9667	1.31071	-0.141729	0.462704	0.116817	0.535524	0.248586	0.304945	0.144026	0.478639	5214.14	6548.39	7201.96	299.823	4958.19	5947.33	4526.87	5505.51	7061.77	5406.84	6407.22
SNF7	YLR025W	Vacuolar-sorting protein SNF7	P39929	No	No	30.4	27.3583	27.679	27.3488		13.478	28.1397	27.7701	27.6822	28.1591	16.9385	28.5842	28.6909	28.7895	28.7157	5.83927	28.8703	28.5196	28.2873	28.2831	20.1723	28.1617	28.2951	28.288	5.12434	0.475755	0.0396252	1.23305	7.44033e-05	1.02803	0.00272796	0.786244	0.00254238	2850.35	3560.09	2831.8		4899.36	3792.02	3568.04	4965.8	6667.39	7178.82	7686.93
SNF6	YHL025W	Transcription regulatory protein SNF6	P18888	No	No	19.3	25.2969		25.5619	25.408	9.27842	25.2913															25.4737	25.4771		0.168249	-0.130997						0.0531261	0.629312	490.096		588.881	35.8459	488.17
SNF5	YBR289W	SWI/SNF chromatin-remodeling complex subunit SNF5	P18480	No	No	14.8	25.1283		24.7032		20.6836	25.9116	25.7634	25.7159	26.1272	13.1947	25.1808	25.2487	25.9884	26.3382	39.2558			25.7715			26.011	25.8776	25.8305	6.57525	0.963751	0.00714535	0.773233	0.156892	0.85576		0.990601	0.0105903	159.91		119.103		275.211	248.356	240.303	319.571	165.836	173.823	290.262
SNF4	YGL115W	5-AMP-activated protein kinase subunit gamma	P12904	No	No	51.9	25.8816		26.4179	26.5331	22.4475	26.0275	26.1014	26.5865	26.1968	18.349		26.3665	25.8371	26.4994	22.6713	26.4379	26.0651	25.3099	26.308	30.3082	26.4208	26.7292	26.8883	16.0121	-0.0495093	0.833338	-0.0432101	0.886832	-0.247296	0.502567	0.401925	0.173714	759.302		1101.2	80.7769	840.096	884.251	1237.7	944.73		1062.69	736.236
SNF2	YOR290C	Transcription regulatory protein SNF2	P22082	No	No	7.3								27.8971														27.9874																	575.911
SNF12	YNR023W	Transcription regulatory protein SNF12	P53628	No	No	18.2	25.8774																					26.6013									0.72387		431.505
SNF1	YDR477W	Carbon catabolite-derepressing protein kinase	P06782	No	No	38.4	28.1795	28.4149	27.8942	28.2037	14.5343	28.3613	28.75	28.6386	28.8223	13.4066	28.4832	28.3564	28.7223	28.2703	14.0452	28.5378	28.6167	28.4754	28.7919	9.72587	28.417	28.4644	28.3394	4.35057	0.469925	0.0188067	0.284994	0.0974649	0.432345	0.0144291	0.233852	0.132309	1886.55	2220.98	1548.09	129.926	2139.87	2801.59	2593.39	2945.5	2328.65	2132.73	2748.41
SNC2	YOR327C	Synaptobrevin homolog 2	P33328	No	No	31.3	27.326	27.5301	27.5211	27.543	6.8921	27.5575			27.9902	21.051				27.5602		28.0622	28.2352		26.9292	41.4118	27.6034	27.8903	28.1074	17.2488	0.293811	0.127943	0.0801542		0.262161	0.485237	0.386973	0.0364617	5805.63	6687.6	6646.2	456.968	6815.97			9199.98
SNC1	YAL030W	Synaptobrevin homolog 1	P31109	No	No	38.5		27.5777	27.2322	28.1518	32.9462	28.4527			27.9347	25.1202	27.0327	27.3537	27.5633		18.0962	27.4528	27.0597	27.4485	27.54	13.8818	29.0895	28.6944	29.018	14.0134	0.539844	0.266471	-0.337343	0.336832	-0.278627	0.3291	1.28009	0.0121782		6784.14	5339.66	683.986	12442.8			8689.22	4649.76	5808.73	6716.74
SNA3	YJL151C	Protein SNA3	P14359	No	No	15.8	26.1351	26.3501		25.6395	23.9178	25.6376	25.7624	25.9415	25.6727	9.68002	26.2412	26.1414	26.6573	26.5118	16.5404	26.2671	26.5818	26.2118	26.1555	13.9207	25.6729	25.8934	26.1615	17.0375	-0.288025	0.196818	0.346367	0.185098	0.262459	0.264816	-0.132288	0.629232	2167.81	2516.28		104.132	1535.55	1674.33	1895.69	1573.34	2333.34	2177.4	3113.39
SNA2	YDR525W-A	Protein SNA2	P56508	No	No	19														26.1777
SMY2	YBR172C	Protein SMY2	P32909	No	No	29.9	27.6953	27.6137	27.9556	27.9582	12.2124	27.6042	27.533	27.2709	27.5115	9.64788			27.8171	27.3162	24.3049	28.1545	28.0479		26.5728	48.4748	27.0596	27.5264	27.1269	18.2075	-0.325786	0.0295136	-0.239039	0.304685	-0.213942	0.647204	-0.568042	0.016766	1193.76	1128.06	1429.78	97.0033	1120.7	1066.76	889.508	1050.94			1298.89
SMY1	YKL079W	Kinesin-related protein SMY1	P32364	No	No	24.2	24.9341	26.2543	25.4069	26.0409	39.0217		24.9656		25.7383	36.992		25.2034							26.0487			25.5152			-0.307094	0.579631	-0.455608		0.389631		-0.143813		194.206	484.953	269.518	28.3254		198.496		339.122		234.07
SMX3	YPR182W	Small nuclear ribonucleoprotein F	P54999	No	No	39.5	26.4232	27.0454	26.6802	26.9102	18.4055	27.5121		26.8406	26.7188	31.4203	26.8964	26.7945	26.6077	26.7696	8.16214	26.6653	26.8195	26.9596		10.1641	26.5859	26.3935	26.6498	9.05135	0.259086	0.36826	0.00230491	0.988164	0.0500339	0.788186	-0.221685	0.2585	4164.96	6410.73	4976.86	395.315	8859.13		5562.35	5112.01	5781.74	5387.4	4732.95
SMX2	YFL017W-A	Small nuclear ribonucleoprotein G	P40204	No	No	20.8			25.5317																																2556.89
SMT3	YDR510W	Ubiquitin-like protein SMT3	Q12306	No	No	63.4	29.3407	29.4228	29.4357	29.2597	5.59949	29.5884	29.8724	29.6525	29.5538	10.2861	30.1036	29.9174	29.9709	30.0764	6.05298	29.9181	29.7501	29.8873	29.7914	5.46928	29.8001	29.593	30.1273	18.9617	0.302027	0.0104976	0.652341	3.5625e-05	0.471997	0.000165393	0.475405	0.0187386	26211.5	27745.5	27995.7	1678.14	31119.6	37891.8	32533.7	30383.3	44478.1	39092.3	40568.9
SMM1	YNR015W	tRNA-dihydrouridine(20) synthase [NAD(P)+]	P53720	No	No	42.7	24.8415	26.1157	25.3993	25.6397	35.7414		26.2482		25.7015	26.4794	26.4051		26.7021	26.7065	11.5354	26.3778	26.4334	26.4524	26.9022	18.0996	25.7334	26.2713	25.9735	18.7781	0.475772	0.331821	1.10549	0.0190912	1.04236	0.0116825	0.493643	0.205616	313.935	759.306	462.11	36.9703		832.318		569.79	927.937		1140.08
SML1	YML058W	Ribonucleotide reductase inhibitor protein SML1	Q04964	No	No	95.2	27.2066	27.7217	27.3796	27.6966	16.9823	27.7927	27.7796	27.6817	27.8755	5.48404	28.412	28.4971	28.469	28.305	5.78992	27.4022	27.9649	27.5663	27.588	17.3095	27.5314	27.4223	27.0727	15.9357	0.281248	0.0761788	0.91965	0.000439732	0.129219	0.482838	-0.159017	0.436464	5851.44	8362.33	6597.22	556.57	8783.96	8705	8133.76	9303.44	13493.3	14313.9	14037.7
SMI1	YGR229C	Cell wall assembly regulator SMI1	P32566	No	No	31.7	27.1536	27.2061	27.3201	27.1948	5.02504	27.4687	26.793	27.5371	27.4654	21.3598	27.2683		27.506	27.4363	8.32654	27.6653	27.622	27.5209	27.4613	6.43047	27.4693	27.3718	27.3037	5.79577	0.0973957	0.605419	0.184853	0.0513664	0.348717	0.00100877	0.162898	0.0381882	1169.45	1212.77	1312.48	81.4898	1454.88	910.809	1525.54	1451.51	1266.19		1492.95
SMF3	YLR034C	Iron transporter SMF3	Q12078	No	No	17.3	26.6625	27.4127	26.9006	27.2846	23.3293	26.7714	27.572	27.4365	27.2103	22.6834	27.9432	27.4798	28.0591	27.8014	16.5603	28.4937	28.0837	28.3218	28.5841	14.7814	28.0173	28.2417	28.1545	7.76861	0.182456	0.486598	0.755757	0.0122048	1.30572	0.000700939	1.0727	0.00386905	917.244	1542.87	1081.83	95.61	989.177	1723.01	1568.52	1340.89	2228.52	1616.27	2414.96
SME1	YOR159C	Small nuclear ribonucleoprotein E	Q12330	No	No	16																						24.4971
SMD3	YLR147C	Small nuclear ribonucleoprotein Sm D3	P43321	No	No	62.4	26.3054	27.414	26.6647	27.9929	52.2244	27.506	26.6319	27.2339	26.9233	25.944	26.265	27.1062	27.54	26.9415	34.3701	26.1485	27.0239	27.1243	27.2445	29.1263	26.5806	27.004	26.2693	25.8261	-0.0204436	0.963021	-0.131062	0.786042	-0.208945	0.661014	-0.476245	0.36819	3303.37	7123.47	4237.51	720.567	7592.71	4142.31	6287.36	5069.64	3212.19	5754.78	7773.56
SMD2	YLR275W	Small nuclear ribonucleoprotein Sm D2	Q06217	No	No	21.8				25.9556			25.9781	26.0887		5.41653	25.8063			25.8206	0.701477	26.4698	26.4513	25.8902	26.0603	19.5711		26.2153	25.8533	17.6477	0.0778522		-0.14213		0.26232		0.0787345					153.297		2299.3	2482.44		2041.09
SMD1	YGR074W	Small nuclear ribonucleoprotein Sm D1	Q02260	No	No	20.5			26.2002	25.7804	20.4295						26.6003							26.3881	26.4795	4.47607		25.8507					0.610018		0.443479	0.174976	-0.1396				2117.95	107.223					2794.92
SMC4	YLR086W	Structural maintenance of chromosomes protein 4	Q12267	No	No	5.6											25.7286					25.9365	25.9907	26.1757		8.85432																					153.273
SMC3	YJL074C	Structural maintenance of chromosomes protein 3	P47037	No	No	23.6	29.323	29.1241	29.5177	28.8811	18.6382	28.7092	28.8722	28.4877	28.9917	14.7732	28.7799	29.155	29.0569	29.1183	11.1921	29.1061	28.8335	28.89	28.8916	8.62509	27.7744	28.5659	28.0587	28.5083	-0.446264	0.0431565	-0.183933	0.295855	-0.281179	0.108086	-1.07848	0.00787212	2124.59	1850.92	2431.51	105.917	1388.35	1554.41	1190.76	1688.6	1458.05	1891.06	1766.71
SMC2	YFR031C	Structural maintenance of chromosomes protein 2	P38989	No	No	9.3
SMC1	YFL008W	Structural maintenance of chromosomes protein 1	P32908	No	No	21.3	27.402	27.8868	28.1953	27.1087	33.1894	27.0888	27.2052	27.7231	27.0069	24.2078	27.8927	27.6221	27.6764	27.7518	8.27998	27.8107	27.1373	27.563	27.5899	18.4955	27.3738	27.6474	27.2768	13.6547	-0.392198	0.226882	0.0875533	0.73801	-0.122966	0.676652	-0.215545	0.507318	561.241	785.358	972.607	31.0156	451.714	489.658	701.116	426.777	788.585	653.71	678.806
SMB1	YER029C	Small nuclear ribonucleoprotein-associated protein B	P40018	No	No	53.1	26.1565		25.566	26.0807	20.7751	26.3239	26.3234	26.3104	26.6002	10.2092	26.8906	26.8436	27.1394	26.8021	10.9383	27.1502	27.1137	26.8053	27.1659	11.1371	27.1732	27.2717	27.0252	8.52036	0.455059	0.0491596	0.984525	0.00272525	1.12434	0.00174483	1.2223	0.00355113	1494.32		992.441	96.0183	1678.14	1677.58	1662.59	2032.39	2485.7	2405.98	2953.39
SLY1	YDR189W	Protein SLY1	P22213	No	No	43.2	27.2963	27.9653	27.0363	28.2697	38.8442	27.9509	28.1672	27.9354	28.0169	7.52014	28.0977	28.1315	27.8602	27.8351	10.725	28.3628	28.0707	27.9959	28.4798	16.014	28.4726	28.46	28.7592	12.0964	0.375711	0.244648	0.339197	0.29663	0.585387	0.106895	0.922035	0.045739	986.77	1568.94	824.045	131.208	1553.38	1804.65	1536.73	1626.06	1719.69	1760.46	1458.66
SLX9	YGR081C	Ribosome biogenesis protein SLX9	P53251	No	No	20.5	26.0936		26.6256	26.5615	18.9106																24.2292		25.2901	49.7765							-1.66723	0.034309	1330.16		1923.31	124.587
SLT2	YHR030C	Mitogen-activated protein kinase SLT2/MPK1	Q00772	No	No	40.1	25.3962		26.0657		32.2378	24.6812			25.2248	26.3343	25.4901					25.0471		25.74		33.3188	26.9164	27.7583	27.1953	30.7108	-0.777982	0.212972	-0.240844		-0.337408	0.556179	1.55903	0.0310537	354.871		564.431		216.182			315.115	378.738
SLM4	YBR077C	Protein SLM4	P38247	No	No	25.3																						26.2214
SLM1	YIL105C	Phosphatidylinositol 4,5-bisphosphate-binding protein SLM1	P40485	No	No	21.7	25.743		25.9246		8.88781		26.4762	26.7623	26.6051	9.96736	26.9409	26.4064	27.1016	26.9117	19.1733	26.5178	26.5833	26.6672	26.9497	13.7774	26.1958	26.4266	25.9455	16.5642	0.78077	0.00854861	1.00638	0.0123586	0.845749	0.00524644	0.355555	0.160633	321.921		365.098			535.144	652.521	585.165	738.507	509.875	825.525
SLK19	YOR195W	Kinetochore protein SLK19	Q08581	No	No	17.1	29.0539	29.3263	28.9958		12.5776	28.7782			28.9372	7.78514				28.2406				27.9753							-0.267599	0.160578	-0.884758		-1.1501				2612.47	3155.28	2509.34		2158.06			2409.5
SLH1	YGR271W	Antiviral helicase SLH1	P53327	No	No	11.2						26.5865	27.1695	26.7831	26.8789	17.1772	27.1605	26.3004			40.9476		25.9196	26.7023		37.445																	200.372	300.15	229.622	245.39	298.281	164.334
SLG1	YOR008C	Protein SLG1	P54867	No	No	6.9						24.4505																															261.015
SLF1	YDR515W	Protein SLF1	Q12034	No	No	37.4	24.7875		24.9911	24.1773	27.1941	25.5136	24.4076			51.7016	24.7393	25.5738	25.1898	25.2558	23	25.4314	25.9048	26.1854	25.25	29.7312	26.2402	25.2664	25.9574	31.9778	0.308637	0.594034	0.537761	0.121356	1.04097	0.0241648	1.1694	0.0366519	254.151		292.671	11.2758	420.413	195.313			245.804	438.344	335.904
SLC1	YDL052C	Probable 1-acyl-sn-glycerol-3-phosphate acyltransferase	P33333	No	No	55.1	29.5731	29.0261	29.573	28.9379	23.3879	29.1886	29.4547	29.3984	29.4649	8.57755	29.4838	29.4329	29.2585	29.0054	14.3752	29.2836	29.3217	29.6246	29.5641	11.8298	29.3043	29.6158	29.4089	11.1514	0.0991026	0.608124	0.0176539	0.933436	0.170967	0.406756	0.165477	0.480067	10538.1	7212.72	10537.4	459.478	8072.42	9707.64	9336.11	9776.25	9905.55	9562.38	8473.5
SLA2	YNL243W	Protein SLA2	P33338	No	No	50.8	29.0985	29.3909	28.696	29.4511	22.3461	29.2636	29.2548	29.3181	29.209	3.10929	28.6544	27.985	28.9419	28.9386	27.3923	29.1596	29.2875	29.4175	29.135	9.16809	29.848	29.5825	29.7324	9.16177	0.102271	0.578049	-0.529138	0.11149	0.0907892	0.639951	0.561878	0.0467889	2359.65	2889.75	1785.17	204.05	2645.82	2629.61	2747.67	2547.54	1734.52	1090.58	2116.91
SLA1	YBL007C	Actin cytoskeleton-regulatory complex protein SLA1	P32790	No	No	35.4	29.0331	29.5028	29.4303	29.3651	13.5614	29.5309	29.5605	29.4707	29.4648	3.24064	29.6339	29.6512	29.6444	29.5047	4.70913	29.5429	29.4267	29.452	29.6096	5.87414	29.5198	29.0076	29.3624	17.5274	0.17389	0.153251	0.275676	0.0453899	0.17497	0.169315	-0.03626	0.845312	1807.93	2503.69	2380.97	154.113	2552.9	2605.72	2448.6	2438.53	2741.7	2774.78	2761.71
SKY1	YMR216C	Serine/threonine-protein kinase SKY1	Q03656	No	No	24.5	26.5042	27.4429	27.1055	26.7335	28.9143		27.5679		26.9886	28.0186	26.6709		26.9465	27.0357	12.7707		27.1277	26.7406	27.1459	15.0876	27.0772	27.8483	27.2654	29.1954	0.331713	0.405646	-0.06218	0.821325	0.0581981	0.836915	0.450449	0.208786	511.26	980	775.621	40.5884		1068.68		715.247	573.874		694.675
SKT5	YBL061C	Protein SKT5	P34226	No	No	11.8
SKP2	YNL311C	F-box protein SKP2	P42843	No	No	6.7
SKP1	YDR328C	Suppressor of kinetochore protein 1	P52286	No	No	63.9	30.1339	29.4143	30.0578	29.545	24.5687	29.7491	29.567	29.8264	29.9672	11.4397	30.132	30.2665	30.3916	30.2307	7.48242	30.0904	30.1065	30.3612	30.2541	9.01153	29.7753	29.7433	29.9499	7.85486	-0.0103023	0.96037	0.467452	0.0476844	0.415303	0.0733735	0.0351169	0.879576	23590.1	14324.6	22376.7	1062.13	18067.2	15924.4	19061.7	21015.2	23558	25860.6	28203.2
SKO1	YNL167C	CRE-binding bZIP protein SKO1	Q02100	No	No	9.6	24.6415																					25.3597									0.718212		166.701
SKN7	YHR206W	Transcription factor SKN7	P38889	No	No	9.5																						25.5511	26.0021	21.9249
SKI8	YGL213C	Antiviral protein SKI8	Q02793	No	No	24.2								27.319	27.0131	14.9373	27.1634	26.6378		27.2192	20.7036	27.1048	26.8976	26.741	27.2527	15.5459	27.195	27.5167	27.4651	11.5787															1692.41	1369.05	1519.36	1055.49
SKI6	YGR195W	Exosome complex component SKI6	P46948	No	No	38.6	25.924	26.8727	26.0568	26.7893	32.9344		27.0124		26.4887	25.3909	27.1812	27.0804	26.8093	27.359	15.547	26.8631	26.3278	26.4997	27.0251	22.0243	26.4836	26.2671	26.4809	8.38513	0.339878	0.444015	0.69678	0.0419297	0.26823	0.394777	-0.000158147	0.999594	1032.84	1993.43	1132.38	127.42		2196.21		1527.63	2468.75	2302.14	1907.77
SKI3	YPR189W	Superkiller protein 3	P17883	No	No	25	27.5339	27.6545	27.7176	27.7691	6.92058	28.1138	28.0839	27.7988	27.9458	9.8009	28.1009	28.0449	28.5459	28.6941	22.2969	27.9369	28.3181	28.3048	28.4865	15.2675	27.7345	27.9309	27.7631	7.49297	0.316777	0.0114939	0.677656	0.00703583	0.592761	0.00337121	0.140712	0.134635	530.685	576.946	602.752	42.3031	793.201	776.953	637.652	706.033	786.183	756.253	1070.19
SKI2	YLR398C	Antiviral helicase SKI2	P35207	No	No	30.7	28.3587	28.514	28.5424	28.0847	13.8577	28.1713	27.6846	28.0154	27.7098	16.6192	27.9778	28.3071	28.54	28.4937	16.713	28.1735	27.9152	28.236	28.4597	15.3721	28.3119	28.0149	27.9739	13.1952	-0.479671	0.0231831	-0.0452987	0.793099	-0.178835	0.287934	-0.274692	0.132034	1053.61	1173.38	1196.74	59.0102	925.257	660.325	830.519	671.988	809.122	1016.63	1194.72
SKG3	YLR187W	Protein SKG3	Q06315	No	No	19.1	27.2629	26.9608	27.1943	27.0293	9.72501	26.7514		26.0371	25.662	39.6343	26.4099	26.7401	27.0856	26.4751	22.2166	26.6167		26.9609		16.7928	27.5675	26.7496	26.8253	33.4653	-0.961665	0.0185318	-0.434177	0.0422932	-0.323046	0.0961204	-0.0643647	0.793953	631.009	511.782	601.702	36.3441	442.627		269.788	208.027	349.33	439.179	558.015
SKG1	YKR100C	Suppressor of lethality of KEX2 GAS1 double null mutant protein 1	P36169	No	No	19.4	25.5841		25.7421		7.73781																	26.1916									0.528533		564.646		630.011
SIT1	YEL065W	Siderophore iron transporter 1	P39980	No	No	3.3			26.0962																																454.526
SIS2	YKR072C	Phosphopantothenoylcysteine decarboxylase subunit SIS2	P36024	No	No	33.6	26.9757	27.5291	26.9185	26.6256	27.6875	26.8241	26.6484	26.5767	26.1397	18.8835			27.224	27.035	9.25124	26.793	26.2805	26.2735		21.7157	26.8132	25.6946	26.3024	37.4925	-0.465011	0.0986946	0.11722	0.705528	-0.56325	0.0873599	-0.742173	0.0879014	944.467	1386	907.756	50.1788	850.221	752.754	716.258	529.082			1121.8
SIS1	YNL007C	Protein SIS1	P25294	No	No	64.2	31.5119	31.6407	31.6003	31.5688	3.75156	31.6746	31.916	31.7866	31.716	7.45911	32.0809	31.9851	32.1137	32.0863	3.83029	31.9248	31.9914	32.0378	32.0462	3.81764	31.7229	31.7019	31.7421	1.39315	0.192874	0.0175861	0.486061	1.6457e-05	0.419613	3.74916e-05	0.141869	0.00828924	36421.7	39822.2	38723.2	2565.72	40770.1	48194.3	44058.8	41957.1	54029.5	50558.9	55272.4
SIR4	YDR227W	Regulatory protein SIR4	P11978	No	No	12	28.1482	27.5653	28.6259	27.4211	39.5161	27.6793		26.4232	26.4458	54.2975				25.5381		26.7764	27.0913	26.8761	26.8605	9.58454	27.2667	26.6998	27.8226	38.1288	-1.09071	0.0712911	-2.40205		-1.03903	0.0108288	-0.677098	0.172653	874.635	583.933	1218	35.784	631.947		264.581	268.75
SIR3	YLR442C	Regulatory protein SIR3	P06701	No	No	8.6	27.2509		27.3275		3.75394																												641.212		676.181
SIP5	YMR140W	Protein SIP5	P40210	No	No	42.3	27.2893	26.8844	27.4882	27.0835	17.9855	27.7013	26.95	27.014	26.5988	34.3306	27.7493	27.5508	27.5073	27.6457	7.52978	27.4049	27.9929	27.601	27.8141	17.5717	27.3731	27.6039	27.5714	8.44993	-0.120317	0.665573	0.426914	0.0230878	0.516869	0.0297905	0.329774	0.102871	1312.81	991.532	1506.91	77.0903	1746.79	1037.72	1084.78	813.444	1805.78	1573.66	1527
SIP1	YDR422C	SNF1 protein kinase subunit beta-1	P32578	No	No	3.7	28.9208	29.0733	29.0014	28.8583	6.51006		27.5255		28.8637	61.2588							28.6961				28.7618	28.2987	28.5949	15.8526	-0.768803	0.138107			-0.267317		-0.411641	0.0223734	2494.83	2773.04	2638.23	161.791		948.485		2398.12
SIN4	YNL236W	Mediator of RNA polymerase II transcription subunit 16	P32259	No	No	10.9
SIN3	YOL004W	Transcriptional regulatory protein SIN3	P22579	No	No	21.8	30.198	30.308	30.463	30.0733	11.5388	30.4088	30.2356	30.1653	30.1727	8.09076	30.2017	30.4066	30.5727	30.5989	12.291	30.3579	30.2541	30.4262	30.2141	6.73325	30.3284	30.3739	30.0882	10.3291	-0.0149848	0.88614	0.184388	0.185876	0.0524842	0.603887	0.00288741	0.982159	3149.65	3399.23	3784.85	195.639	3645.23	3232.76	3079.08	3094.93	3157.84	3639.61	4083.79
SIL1	YOL031C	Nucleotide exchange factor SIL1	Q08199	No	No	41.6	26.3431	27.1676	26.4597		32.9082	27.6194	27.4988	27.4805	27.5047	4.46999	28.2373	28.6448	28.1233	28.6543	18.7708	27.7135	27.1944	27.4507	27.4843	14.6152	27.4988	26.896	27.5327	22.8602	0.869035	0.0106067	1.75813	0.00127648	0.803915	0.023413	0.65234	0.119526	788.411	1396.18	854.761		1909.65	1756.46	1734.33	1763.68	2930.55	3887.18	2708
SIF2	YBR103W	SIR4-interacting protein SIF2	P38262	No	No	12.3
SIC1	YLR079W	Protein SIC1	P38634	No	No	15.5																		25.2863	25.7081	20.5314
SHY1	YGR112W	Cytochrome oxidase assembly protein SHY1	P53266	No	No	9							24.7282				24.7029											24.2295	24.4596	11.2563														275.798			270.995
SHS1	YDL225W	Seventh homolog of septin 1	Q07657	No	No	51	28.4418	29.2825	28.5938	28.7171	27.5813	28.7904	28.9126	28.739	28.6453	7.77228	28.7455	28.7557	28.8062	28.6444	4.6398	28.5262	28.6042	28.6186	28.6838	4.4724	28.6228	28.8748	28.9433	11.3536	0.0130344	0.947997	-0.0208588	0.914605	-0.150606	0.449599	0.0547868	0.822558	2602.87	4661.55	2892.2	213.339	3314.39	3607.29	3198.38	2997.28	3212.73	3235.5	3350.94
SHR3	YDL212W	Secretory component protein SHR3	Q02774	No	No	4.8	25.6599			26.1966	26.0036	25.3771	26.6933	26.3716	26.1536	34.5779	25.9733					25.6059	25.8998	26.2985	26.4836	26.5652		27.1801	26.7812	19.4263	0.220648	0.650397	0.0450222		0.143679	0.693194	1.05238	0.0878308	1008.13			99.0369	828.679	2063.38	1651.03	1419.47	1252.69
SHP1	YBL058W	UBX domain-containing protein 1	P34223	No	No	74.7	29.5561	30.1946	29.7559	30.0979	20.1478	30.147	30.0603	29.9837	30.2191	7.08588	30.2406	30.097	30.1519	30.0333	6.12163	29.9959	30.0808	30.0739	30.3228	10.1809	29.9259	29.9586	30.035	3.90588	0.201418	0.247306	0.229594	0.188942	0.217259	0.235014	0.0720792	0.702098	7510.78	11692.4	8626.54	740.478	11312.7	10653.3	10102.4	11892.2	12071.1	10927.3	11351.7
SHO1	YER118C	High osmolarity signaling protein SHO1	P40073	No	No	9.8								25.882					26.01																										672.277				734.637
SHM2	YLR058C	Serine hydroxymethyltransferase, cytosolic	P37291	No	No	86.1	34.7938	34.7893	34.8134	34.6084	6.42618	35.1587	35.1608	35.173	35.0794	2.92885	35.4228	35.4082	35.4002	35.5067	3.44976	35.3988	35.3788	35.424	35.4102	1.32272	35.5109	35.5021	35.5264	0.854688	0.391789	0.000297862	0.683281	1.46294e-05	0.651732	1.09655e-05	0.761951	4.18753e-05	255004	254208	258497	15186.7	328407	328869	331677	310837	394377	390405	388238
SHM1	YBR263W	Serine hydroxymethyltransferase, mitochondrial	P37292	No	No	65.7	31.9466	32.0128	31.9807	32.0283	2.50232	31.7586	31.7364	31.8108	31.6658	4.14705	31.7461	31.8054	31.5933	31.5691	8.01374	31.8977	31.6924	31.7091	31.7333	6.74692	31.7003	31.7595	31.6928	2.54997	-0.24921	0.000391502	-0.313623	0.00203769	-0.233981	0.0036109	-0.274568	0.000180334	34469.4	36085.8	35293	2470.39	30257.9	29794.9	31371.4	28372.5	29996.4	31255.6	26980.9
SHE4	YOR035C	SWI5-dependent HO expression protein 4	P51534	No	No	11.4									24.259													24.87																		100.231
SHE3	YBR130C	SWI5-dependent HO expression protein 3	P38272	No	No	37.2	25.1826	26.0493	25.872	25.6898	23.9323	26.1753		25.6395		25.9628		26.3932		25.6726	34.6036	25.9027	25.6849	25.1286		25.9235	25.2285	26.8147	25.3611	66.4528	0.208992	0.55507	0.334455	0.401667	-0.126385	0.68463	0.103008	0.838295	359.073	654.772	579.055	34.5625	714.534		492.873			831.022
SHE10	YGL228W	Sensitivity to high expression protein 10	P53075	No	No	37.3	28.5437	28.9707	28.5679	28.6825	14.2373	29.0683	29.1798	29.1203	29.1966	4.03959	29.5213	29.6092	29.5366	29.6656	4.67043	29.4045	29.4837	29.6032	29.5441	5.86464	29.2498	29.3821	29.4378	6.60674	0.450054	0.00456147	0.892008	0.000134509	0.817704	0.000259148	0.665376	0.00312616	2616.48	3517.73	2660.82	195.092	3763.88	4066.32	3902.23	4114.06	5152.59	5476.17	5207.49
SHB17	YKR043C	Sedoheptulose 1,7-bisphosphatase	P36136	No	No	59.4	30.0312	30.405	30.3916	30.3054	11.4373	30.1842	30.0312	30.164	30.0254	5.86536	30.2528	30.0561	30.2598	30.1155	6.98932	30.2907	30.0733	30.0398	30.1374	7.89399	29.8873	29.9307	29.9937	3.72163	-0.182098	0.108516	-0.112258	0.307189	-0.148008	0.201341	-0.346035	0.0223389	15813	20489.8	20301	1295.09	17582.8	15813	17337.8	15749.6	18438.9	16088.3	18528.3
SGV1	YPR161C	Serine/threonine-protein kinase BUR1	P23293	No	No	35.2	26.3019	27.3653	26.4552	26.086	44.1559	27.161	26.1801	25.4899	26.3203	48.7409	26.8116	27.5965	26.689	26.9282	31.0927	26.4036	27.0161	27.391	27.0856	26.4669	26.9784	26.6693	26.772	11.0791	-0.264301	0.573144	0.45423	0.238228	0.421951	0.272468	0.254439	0.489838	498.249	1041.22	554.101	29.0519	903.728	457.892	283.783	504.638	709.383	1222.25	651.568
SGT2	YOR007C	Small glutamine-rich tetratricopeptide repeat-containing protein 2	Q12118	No	No	75.7	32.4169	32.669	32.5845	32.3444	10.3396	32.4108	32.4867	32.5373	32.3483	5.75132	32.4033	32.3626	32.3209	32.4341	3.40291	32.4271	32.3337	32.388	32.3312	3.21929	32.2141	32.1507	32.3517	7.20284	-0.0579402	0.522808	-0.123472	0.167013	-0.133705	0.137714	-0.264856	0.0473428	68882.8	82032.1	77368.7	4436.07	68589.7	72294.5	74874.9	65683.8	68236.6	66336.1	64447.7
SGT1	YOR057W	Protein SGT1	Q08446	No	No	45.6	26.1301	26.4724	25.8773	26.7082	25.1286	26.9343	27.3093	26.9747	26.4048	24.603	27.4092		27.7661	26.9719	26.9411	27.3468	27.2137	26.8115	28.0053	36.2404	27.0032	27.9732	27.6966	31.8595	0.608744	0.0591211	1.08539	0.0133753	1.04735	0.0145784	1.2607	0.0116005	731.961	928.005	614.305	74.0034	1278.12	1657.55	1314.4	885.467	1776.36		2274.99
SGN1	YIR001C	RNA-binding protein SGN1	P40561	No	No	32	25.3882	25.5101	26.0074	25.9099	20.6192	26.2414	25.7037	26.0017	25.8514	16.1872	26.5529	25.9547	26.3089	26.5819	18.9298	26.6431	26.4337	26.9023	26.6432	13.4596	27.0217	26.4758	26.7712	18.7111	0.245639	0.241951	0.645698	0.0214466	0.951649	0.00177426	1.05229	0.00511638	678.13	737.873	1041.61	65.9318	1225.04	843.895	1037.45	934.83	1520.28	1004.22	1283.7
SGM1	YJR134C	Protein SGM1	P47166	No	No	22.2																						26.5859	26.5936	0.378057
SGF29	YCL010C	SAGA-associated factor 29	P25554	No	No	22
SGD1	YLR336C	Suppressor of glycerol defect protein 1	Q06132	No	No	8.5	25.1457																																161.358
SFT2	YBL102W	Protein transport protein SFT2	P38166	No	No	28.8	27.2772	26.623	26.3618	26.5358	30.4784	27.2838	27.4942	27.733	27.5583	12.7348	27.793	27.5701	27.6073	27.7698	7.79017	27.8424	27.7343	27.7214	27.4815	10.2105	27.7354	27.6392	27.9193	9.99602	0.817879	0.0099871	0.985581	0.00318675	0.995486	0.00350339	1.06521	0.00756436	2995.79	1903.57	1588.37	121.359	3009.61	3482.04	4108.83	3640.26	4283.25	3670.1	3766.06
SFT1	YKL006C-A	Protein transport protein SFT1	P43682	No	No	27.8									23.7628							26.4546			24.3188	88.9932																				580.651
SFL1	YOR140W	Flocculation suppression protein	P20134	No	No	6.1									22.4641																															31.0376
SFK1	YKL051W	Protein SFK1	P35735	No	No	4.2																						23.3659
SFH5	YJL145W	Phosphatidylinositol transfer protein SFH5	P47008	No	No	68.7	27.9025	27.0649	27.7924	27.78	23.2429	28.2251	28.489	28.0985	28.2644	11.5408	28.7788	28.5158	28.9257	28.9568	13.3264	28.4826	29.0209	28.9262	29.1718	19.1213	29.1116	29.2961	29.1519	6.82441	0.634315	0.0227505	1.15931	0.00174794	1.26542	0.00198053	1.55158	0.00112948	3262.06	1825.27	3022.32	202.927	4079.47	4898.17	3736.75	4192.06	5987.69	4990.09	6629.7
SFH1	YLR321C	Chromatin structure-remodeling complex subunit SFH1	Q06168	No	No	25.8	26.1544	26.4526	26.5347	26.369	10.9872	27.0478	27.2255	27.0504	26.8938	9.44678	27.0564	27.4499	26.5933	26.491	31.6075	26.2264		26.7447	26.5258	17.7151	26.7793	26.6492	26.6026	6.4279	0.676731	0.000701553	0.519993	0.0697747	0.121322	0.478796	0.299394	0.037325	684.615	841.786	891.072	53.7979	1271.7	1438.43	1273.99	1142.92	1279.31	1680.42	928.066
SEY1	YOR165W	Protein SEY1	Q99287	No	No	32.3	26.8726	27.9072	27.563	27.5879	27.4348	27.2695	27.5031	27.1779	27.5565	12.5158	27.8481	27.0862	26.4269	27.0423	41.5126	27.1587	27.5137	28.4842	27.5529	43.8856	27.9295	28.4032	27.9801	18.8243	-0.105931	0.669505	-0.381786	0.334115	0.194724	0.605455	0.621602	0.0824645	614.266	1258.38	991.315	68.299	808.79	950.97	759.046	986.815	1207.89	712.303	451.028
SES1	YDR023W	Serine--tRNA ligase, cytoplasmic	P07284	No	No	81.2	32.7449	33.2888	32.9431	33.0246	15.8518	32.3966	32.6112	32.5796	32.6963	8.53803	32.1081	31.9285	32.2119	32.0566	8.11323	32.0785	32.1312	32.1456	32.2945	6.56372	32.1883	32.4378	32.3099	8.64912	-0.42945	0.015897	-0.924096	0.000345033	-0.83793	0.000465706	-0.688358	0.00531376	60366.8	88011.5	69256	4962.88	47419.2	55022.7	53831.8	58364.9	38823.5	34279.5	41719.5
SER33	YIL074C	D-3-phosphoglycerate dehydrogenase 2	P40510	No	No	44.8	29.6083	29.8783	29.7056	29.8468	8.62985	29.7947	30.0342	30.0221	30.0657	8.26987	30.3866	30.0621	30.3522	30.04	12.7481	30.3095	30.3748	30.5023	30.5158	6.89125	30.2824	30.5527	30.4113	9.38118	0.219419	0.0477984	0.450459	0.00685548	0.665851	0.000167911	0.65573	0.00118331	7148.37	8620.02	7647.27	571.147	8134.3	9603.42	9523.06	9815.67	12260.4	9791.21	11971.3
SER3	YER081W	D-3-phosphoglycerate dehydrogenase 1	P40054	No	No	21.3	26.2866		26.3076	25.9779	12.2988						27.9242	26.8557	27.9492	27.6277	30.3472	29.4651	29.4458	29.6	29.9005	15.2763	29.7251	29.5313	29.2983	14.6694			1.39849	0.00675156	3.41217	3.35725e-06	3.32752	3.40195e-05	714.907		725.387	39.0881					2224.42	1060.6	2263.29
SER2	YGR208W	Phosphoserine phosphatase	P42941	No	No	39.8	26.4782	26.3299	27.4795	26.7642	38.9241	26.4921		26.3691	27.289	37.028			26.5675	26.3624	10.035			25.9387	26.1958	12.5662	26.2282	26.2461	26.1408	3.866	-0.0462265	0.909472	-0.29796	0.485385	-0.69567	0.149764	-0.557891	0.12522	1221.86	1102.48	2445.84	100.889	1233.64		1132.82	2143.39			1299.89
SER1	YOR184W	Phosphoserine aminotransferase	P33330	No	No	85.1	31.2096	31.4649	31.2109	31.3404	8.60686	30.9009	31.2229	31.1007	31.1332	9.16534	31.2061	31.0802	31.2687	31.1024	6.1692	31.2957	31.1366	31.1665	31.3282	6.53641	31.0854	31.2203	31.1108	5.02982	-0.217064	0.0550919	-0.142114	0.108637	-0.0747182	0.370439	-0.16764	0.0907323	25572.4	30524.7	25597.1	1896.28	20646.8	25809.2	23713.5	24254.2	25510.6	23379.9	26642.3
SEN2	YLR105C	tRNA-splicing endonuclease subunit SEN2	P16658	No	No	1.9	27.0885		27.1165		1.37388																												1446.53		1474.91
SEN1	YLR430W	Helicase SEN1	Q00416	No	No	3.5
SEM1	YDR363W-A	26S proteasome complex subunit SEM1	O94742	No	No	40.4
SEH1	YGL100W	Nucleoporin SEH1	P53011	No	No	32.1	26.8921	26.6125	27.5041	26.493	33.9691	26.9654	27.1532	27.1561	27.0885	6.05213	27.1181	26.8474	26.8883	26.9791	8.46748	27.6112	27.2663	27.4859	27.27	11.8933	27.2874	27.6254	27.4724	11.6484	0.215394	0.385156	0.0828391	0.734858	0.532943	0.0690721	0.586315	0.0897629	1423.38	1172.53	2175.36	73.0962	1497.55	1705.66	1709.2	1630.92	1664.75	1379.96	1419.61
SEG2	YKL105C	Eisosome protein SEG2	P34250	No	No	9.5
SEG1	YMR086W	Eisosome protein SEG1	Q04279	No	Yes	49.8	28.6845	29.0457	28.6342	29.0624	15.7482	29.5136	29.1863	29.3251	29.0708	13.3902	29.7582	29.6209	29.901	29.742	7.99139	29.6689	29.7606	29.8711	29.6611	6.9096	29.6276	29.4482	29.6703	7.99495	0.417227	0.0311126	0.898807	0.000416677	0.883723	0.00039316	0.725324	0.00433182	1821.91	2340.2	1759.45	160.335	3236.63	2579.78	2840.34	2381.21	3834.7	3486.72	4233.6
SEE1	YIL064W	N-lysine methyltransferase SEE1	P40516	No	No	7.8			25.6704				25.7831																		0.112673										832.257			899.861
SED5	YLR026C	Integral membrane protein SED5	Q01590	No	No	31.8	24.2185	25.7332	25.3957		46.497	25.8464	24.7793			50.0421	25.932	26.6048	26.1524		24.4787		25.4419	26.3531	26.4054	32.8901	25.9023	26.2366	26.1344	11.6005	0.197001	0.800468	1.11392	0.0898298	0.950969	0.162105	0.975283	0.106423	224.901	642.628	508.593		695.071	331.735			737.537	1175.83	859.326
SED4	YCR067C	Putative guanine nucleotide-exchange factor SED4	P25365	No	No	7.8											25.6095							25.8855	25.7268	7.77257	25.4355																				200.64
SEC9	YGR009C	Protein transport protein SEC9	P40357	No	No	33.9	26.8113	26.873	26.6882	27.0873	11.8174	27.5113	26.9029	26.8976	27.0487	21.6493	27.1837	26.6284	26.9889	26.3453	25.2385	27.0724	27.2882	26.8572	26.8428	14.9599	26.9905	26.6782	26.6371	13.847	0.225189	0.226326	-0.0783712	0.71479	0.150223	0.305801	-0.0963422	0.510107	715.127	746.402	656.646	58.6418	1161.78	762.009	759.215	843.08	925.73	629.987	808.829
SEC8	YPR055W	Exocyst complex component SEC8	P32855	No	No	19.9	26.4234		25.8596		27.2847	26.0528	25.7224	26.1347		14.5231	26.2177		26.3454	25.9342	14.1807		26.429	26.5953	26.2321	12.514	26.0742	26.4119	26.0348	14.8886	-0.17153	0.564557	0.0242728	0.932082	0.277314	0.348291	0.0321472	0.909694	329.215		222.728		254.645	202.52	269.507		285.471		311.905
SEC72	YLR292C	Translocation protein SEC72	P39742	No	No	31.1	27.1031	26.7919	27.2904	26.2516	28.9829	27.6873	27.8385	28.0079	27.9525	9.62502	28.1694	28.2218	28.1123	28.0574	4.92032	27.9202	28.0424	28.0108	28.0242	3.7102	27.8198	28.0764	27.7646	11.8427	1.01231	0.00535279	1.28094	0.00141763	1.14016	0.00249206	1.02767	0.0145431	2982.97	2404.21	3396.61	111.959	4472.18	4966.31	5585	5374.77	6246.32	6477.45	6004.02
SEC7	YDR170C	Protein transport protein SEC7	P11075	No	No	36.5	29.8898	30.3865	30.1167	30.1094	14.2631	30.1827	30.2396	30.2741	30.1866	3.06238	30.3102	30.1482	30.3204	30.2235	5.55345	30.235	29.9801	30.016	30.2028	8.92539	29.9271	30.3352	30.106	14.2673	0.0951407	0.395574	0.124997	0.296769	-0.0171363	0.891475	-0.00284008	0.986149	1960.39	2765.96	2294.19	154.581	2401.59	2498.15	2558.65	2408.1	2623.48	2344.84	2642.21
SEC66	YBR171W	Translocation protein SEC66	P33754	No	No	37.4	26.7797		26.6629		5.72173	26.7117	27.3481	27.1784	27.3498	19.0693	27.0299	27.3899	27.2969	27.0554	12.3839	27.0514	27.2498	26.9983	27.3427	11.3061	27.1152	27.5568	27.2549	16.0043	0.425715	0.136103	0.471751	0.0269723	0.439282	0.0259318	0.587688	0.0430473	2125.78		1960.45		2027.98	3152.22	2802.39	3156.1	2528.38	3245.03	3042.44
SEC65	YML105C	Signal recognition particle subunit SEC65	P29478	No	No	60.8	28.5356	28.5997	28.4622	28.6615	5.90953	28.3545	28.379	28.1859	28.4643	7.91345	28.1801	28.4348	28.3974	28.1	11.2464	28.2672	28.1497	28.1728	28.2115	3.58424	28.0273	27.8099	27.7029	11.6453	-0.218809	0.0231865	-0.286666	0.0208861	-0.364448	0.000335063	-0.718038	0.000627863	5581.47	5834.93	5304.77	412.448	4923.07	5007.41	4380.14	5312.23	4362.5	5204.93	5071.53
SEC63	YOR254C	Protein translocation protein SEC63	P14906	No	No	48.9	29.741	30.2908	30.1269	30.2677	16.3818	29.9285	30.3087	30.1014	30.4275	15.1302	30.308	29.8985	30.208	30.1024	11.8548	29.957	29.9809	30.025	30.2565	9.91243	29.8715	30.1082	30.0142	8.18644	0.0848947	0.632345	0.0226222	0.888317	-0.0517672	0.732432	-0.108611	0.530033	5324.55	7794.36	6957.66	519.495	6063.4	7891.67	6835.42	8569.34	7888.11	5938.78	7359.98
SEC62	YPL094C	Translocation protein SEC62	P21825	No	No	37.6	27.4775	27.2836	26.6078	27.0208	24.7374	27.5973	27.7415	27.8058	28.2277	19.9213	28.0284	28.0416	28.0218	28.0979	2.42366	27.6262	27.8204	28.017	27.9439	11.5413	28.4061	28.0504	28.2883	12.2867	0.74565	0.0182101	0.949993	0.00238418	0.754417	0.0106947	1.1508	0.0048358	2665.51	2330.18	1458.7	131.532	2896.28	3200.66	3346.57	4483.35	3904.98	3940.63	3887.15
SEC61	YLR378C	Protein transport protein SEC61	P32915	No	No	19.6	29.8343	30.7103	30.4089	29.9654	28.3372	30.715	31.2721	30.8337	30.9333	17.3946	31.2091	30.3667	31.1023	31.2546	24.8865	30.687	30.8191	30.8749	30.9275	7.03675	30.7413	30.8118	30.8698	4.44965	0.70879	0.0234332	0.753461	0.0406959	0.597367	0.0285776	0.577879	0.0617346	8084.87	14837.8	12040.5	599.607	14886	21902	16163	17318.4	20967	11693.4	19470.4
SEC53	YFL045C	Phosphomannomutase	P07283	No	No	89	32.3614	32.5032	32.4276	32.555	5.86989	32.8616	33.208	33.1293	33.1349	10.0834	33.1382	32.9361	33.01	33.0432	5.84184	32.9725	33.0848	33.0528	33.1586	5.33458	32.8479	33.0617	32.8798	8.15488	0.621658	0.000382382	0.570057	7.52354e-05	0.60534	4.25778e-05	0.467959	0.00155174	84880.6	93647.8	88868.1	6573.97	120055	152642	144535	145100	145432	126415	133065
SEC5	YDR166C	Exocyst complex component SEC5	P89102	No	No	16.8	28.0732		27.1232		44.9517		28.1383	28.5346	27.7014	28.3928	26.8467			28.4472	71.2802		28.0317	26.6796	27.4122	44.8316	27.403	27.355	27.1472	9.19285	0.526577	0.345033	0.0487866	0.962956	-0.223697	0.740705	-0.296484	0.479687	1126.15		582.913			1178.15	1550.51	870.302	481.268
SEC4	YFL005W	Ras-related protein SEC4	P07560	No	No	78.1	30.0338	30.4414	30.1643	30.0293	14.0142	30.0632	30.6585	30.3953	30.4211	16.5432	30.533	30.1766	30.2661	30.4706	11.5678	30.4406	30.3112	30.3551	30.5006	5.90179	30.5402	30.6352	30.332	10.5344	0.217278	0.212929	0.194343	0.179735	0.234613	0.0679227	0.335242	0.0577338	20908.1	27734.9	22888.2	1411.57	21338	32237.2	26861.8	27346.8	29551.4	23084.2	24560.2
SEC31	YDL195W	Protein transport protein SEC31	P38968	No	No	47.6	31.6482	31.6576	31.5658	31.6555	3.01604	31.5556	31.6248	31.5267	31.5578	2.90463	31.4656	31.5904	31.5738	31.4477	5.06514	31.4277	31.4614	31.4056	31.413	1.72593	31.3353	31.4056	31.2685	4.75397	-0.0655762	0.0737487	-0.112391	0.0390015	-0.204838	0.000191303	-0.295302	0.000916962	10847.3	10918.2	10244.9	738.318	10172.7	10672.3	9970.98	10188.2	9557.47	10421.2	10302.3
SEC3	YER008C	Exocyst complex component SEC3	P33332	No	No	21.9	26.3088		27.0184	26.5541	25.6559	27.0668	25.9958	26.8316	26.19	34.6533	27.3413	27.3	26.8687	27.5363	18.3687	27.0217	27.6485	27.3206	27.668	20.2822	27.1486	27.5246	27.536	14.556	-0.10603	0.773038	0.634481	0.0463259	0.787604	0.0258876	0.775993	0.0334919	240.25		392.902	19.2864	406.312	193.402	345.184	221.264	491.459	477.586	354.172
SEC28	YIL076W	Coatomer subunit epsilon	P40509	No	No	43.2	27.1431	27.9927	27.8198	27.9007	23.5313	27.9616	28.5793	28.2645	28.7038	22.2096	29.0013	28.3664	29.2037	28.9932	22.6672	28.4313	28.6623	28.6657	28.7547	9.25614	27.893	28.4983	28.2721	20.5398	0.663214	0.0408277	1.17709	0.00439834	0.914426	0.00433567	0.507049	0.121927	1958.79	3529.81	3131.2	224.279	3454.47	5300.79	4261.59	5778.3	7101.91	4573.63	8171.24
SEC27	YGL137W	Coatomer subunit beta	P41811	No	No	50.7	30.7693	31.2261	30.7766	31.0497	15.6753	31.3105	31.8206	31.7198	31.694	14.5194	31.7147	31.5407	31.4651	31.5543	7.42127	31.5041	31.5457	31.6023	31.6647	4.85415	31.4256	31.8555	31.6298	14.9179	0.68082	0.00502686	0.613309	0.0024946	0.623796	0.00175076	0.681569	0.0097033	8228.01	11292.9	8269.83	676.759	11973.6	17051.7	15900.8	15619.8	15845	14044.9	13328.2
SEC26	YDR238C	Coatomer subunit beta	P41810	No	No	47.8	30.6846	30.6207	30.4598	30.5937	6.44587	30.3947	30.8385	30.857	30.7744	13.9908	30.8022	30.4277	30.7561	30.6475	11.1525	30.6293	30.6349	30.6361	30.8279	6.967	30.834	31.0958	30.855	10.3537	0.126436	0.326877	0.0686568	0.500987	0.0923305	0.222479	0.338568	0.0130454	7077.55	6770.8	6056.4	450.037	5789.01	7874.38	7975.68	7531.95	7678.35	5923.11	7436.8
SEC22	YLR268W	Protein transport protein SEC22	P22214	No	No	42.5	27.0645	27.5117	27.3067	27.4545	13.3144	27.0883	27.6087	27.436	27.2421	15.73	28.0356	27.0655	27.727	27.3103	29.8552	27.39	27.202	27.4078	27.2984	6.47707	26.9985	26.7599	26.949	8.53751	0.00944701	0.952164	0.200259	0.431798	-0.00978553	0.932292	-0.431855	0.0226642	2504.28	3414.45	2962.13	222.245	2546.03	3651.94	3239.95	2832.41	4909.52	2506.06	3964.02
SEC21	YNL287W	Coatomer subunit gamma	P32074	No	No	57.2	30.6497	31.0517	30.5104	30.9069	16.8968	30.9525	31.3618	31.1887	31.3457	12.6431	31.3261	31.0551	31.2497	31.294	8.13201	31.2556	31.273	31.2774	31.3999	4.6914	31.2899	31.3281	31.3987	3.84668	0.432503	0.0314586	0.451543	0.0162936	0.521807	0.00623841	0.559223	0.0126385	7184.3	9493.34	6523.23	581.507	8862.55	11769.1	10438.9	11639	11481.7	9515.51	10889.7
SEC2	YNL272C	Rab guanine nucleotide exchange factor SEC2	P17065	No	No	13.7				28.1998			27.8146							27.9175			27.5426				27.2201	27.0817		6.77768	-0.385181		-0.282235		-0.657166		-1.04884					110.274		1246.78
SEC18	YBR080C	Vesicular-fusion protein SEC18	P18759	No	No	61.1	29.7014	29.7531	29.8492	29.451	11.341	30.1303	30.1892	30.1004	30.0162	4.96092	30.1234	29.9929	29.9166	29.987	6.06467	30.1326	30.0831	30.2474	30.1789	4.86476	30.1199	30.3222	30.1371	7.93436	0.420341	0.00386519	0.316289	0.0159904	0.471821	0.00214179	0.504391	0.00690354	4643.49	4813.01	5144.39	264.366	6250.97	6511.6	6122.78	5775.97	6221.18	5683.42	5390.34
SEC17	YBL050W	Alpha-soluble NSF attachment protein	P32602	No	No	67.1	29.3319	29.7839	29.6465	29.4195	14.4077	29.6868	30.0376	29.8782	29.8674	9.8844	29.9714	29.7534	30.2546	29.9441	14.6473	30.0923	30.068	30.2545	30.3395	9.08162	29.8989	29.9636	29.9817	2.99403	0.322008	0.0430664	0.435385	0.0247369	0.643103	0.00190344	0.402596	0.0229454	9210.53	12599.6	11455	662.824	11778.8	15021.7	13450.6	13349.8	14348.4	12335.4	17460.1
SEC16	YPL085W	COPII coat assembly protein SEC16	P48415	No	No	45.1	30.1765	30.6369	30.5088	30.4886	12.9433	30.5599	30.3811	30.4174	30.4153	5.63444	30.4695	30.5822	30.7469	30.652	8.06534	30.5009	30.3967	30.3421	30.4151	4.60226	30.4818	30.4389	30.3947	3.01951	-0.0092741	0.932814	0.159916	0.209861	-0.0389866	0.718467	-0.0142456	0.908265	2244.81	3088.72	2826.22	188.731	2928.15	2586.85	2652.71	2648.82	2750.2	2973.66	3333.27
SEC15	YGL233W	Exocyst complex component SEC15	P22224	No	No	9						24.3692		24.333		1.77425											24.5981	24.7224		6.08828													92.219		89.9337
SEC14	YMR079W	SEC14 cytosolic factor	P24280	No	No	64.8	30.7308	31.02	30.7363	30.8105	9.73045	29.9632	30.449	30.2876	30.3774	14.0428	29.9334	29.6961	29.957	29.8422	8.00562	30.0295	29.9577	30.0234	30.0663	3.10847	29.8926	30.4767	30.2029	20.0274	-0.555072	0.00468554	-0.967217	3.80773e-05	-0.805181	2.90011e-05	-0.633624	0.0113653	22827.4	27895.3	22914.5	1633.73	13409	18777.9	16789.7	17868.4	13134.8	11142.4	13351.3
SEC13	YLR208W	Protein transport protein SEC13	Q04491	No	No	81.1	30.8362	30.3629	30.5924	30.3189	16.9818	30.2676	30.7502	30.6568	30.6457	13.8521	30.5447	30.5677	30.7116	30.5507	5.63372	30.5111	30.7277	30.7386	30.8307	9.10136	30.8274	31.0486	30.791	9.89509	0.0524976	0.753847	0.0660977	0.617254	0.174424	0.249965	0.361395	0.0685162	25938.3	18683.2	21904.8	1227.33	17489.7	24436.4	22906.1	22730.2	21193.1	21534.1	23792.3
SEC12	YNR026C	Guanine nucleotide-exchange factor SEC12	P11655	No	No	18	25.5254	26.3566	25.6859	26.0722	26.3075	26.9629	26.2801			32.8564		26.7763	26.3805		19.2811	26.394		26.2756	26.9222	25.0442		26.9901	26.6031	18.853	0.711476	0.112587	0.668373	0.0949551	0.620597	0.0756949	0.886617	0.0441503	418.401	744.406	467.644	41.3936	1133.26	705.957				995.775	756.829
SEC11	YIR022W	Signal peptidase complex catalytic subunit SEC11	P15367	No	No	43.1	27.4195	28.5596	27.4853	28.0441	38.6989	27.7054	27.9827	28.338	28.3674	20.9425	28.1432	27.9888	28.383	28.0307	12.7189	27.6672	27.7634	28.1144	27.1513	26.3853	28.131	28.55	28.0886	18.4478	0.221243	0.502417	0.259284	0.392441	-0.203057	0.564533	0.379393	0.314306	4277.68	9428.25	4477.37	446.639	5215.14	6320.61	8085.44	8252.01	7064.09	6347.3	8341.85
SEC10	YLR166C	Exocyst complex component SEC10	Q06245	No	No	11.4	27.665	27.9273	27.986		11.4726	27.9322	28.379	28.314	28.1589	13.3147	28.1538	28.5935	28.7049	28.4904	15.6379		28.4177	28.2197		9.69078	28.1306	28.1586		1.37256	0.336597	0.0660919	0.626219	0.0121621	0.459229	0.0525164	0.285121	0.11196	948.237	1137.3	1184.57		1141.17	1555.47	1486.9	1335.4	1330.63	1804.82	1949.72
SEC1	YDR164C	Protein transport protein SEC1	P30619	No	No	14.5	29.2185	28.0033		28.7669	39.5197	27.3624	27.0008	27.3792	28.0897	34.0413	27.9273					28.0218		28.3022		13.6967	28.3086	28.1656	27.9091	13.7301	-1.20485	0.0299313	-0.735614		-0.500889	0.364358	-0.535108	0.225119	3345.59	1440.97		165.67	924.137	719.226	934.956	1529.93	1367.01
SDT1	YGL224C	Suppressor of disruption of TFIIS	P53078	No	No	38.9		25.6678	25.1165	26.0098	29.7871		25.7012	25.1816	25.4543	17.8653	25.8984		25.8955		0.143722		25.3425	25.5214	25.4966	6.59381		25.4582	25.1927	12.9737	-0.152329	0.638759	0.298952	0.439075	-0.144521	0.61599	-0.272572	0.49312		745.534	508.743	63.9929		763.002	532.225	642.949	874.762		872.986
SDS3	YIL084C	Transcriptional regulatory protein SDS3	P40505	No	No	8.9
SDS24	YBR214W	Protein SDS24	P38314	No	No	41	27.0393	26.1123	28.0333	26.7478	58.6952	28.0115	28.5534	28.3008	28.171	16.1812	28.3803	28.1956	28.5831	28.6601	14.1932	28.4659	28.1762	28.5812	28.8707	19.8789	28.6471	28.8414	28.6495	7.89157	1.27602	0.0220276	1.4716	0.0119353	1.54031	0.0110421	1.72951	0.0150444	1078.27	567.141	2147.71	59.6651	2115.5	3079.94	2585.13	2362.79	2731.57	2403.36	3143.97
SDS23	YGL056C	Protein SDS23	P53172	No	No	39.1	27.2428	27.1967	27.3185	27.2811	3.6098	27.2803	27.3768	27.2874	27.1701	5.83703		27.0616	27.0855		1.1715	27.3929	27.73	26.8502	27.3112	24.2926	27.4051	27.5292	27.6738	9.34308	0.0189004	0.716999	-0.186237	0.00946531	0.0613121	0.749152	0.27626	0.0121057	1222.22	1183.74	1288.02	84.9974	1254.39	1341.2	1260.62	1162.12		1077.93	1095.94
SDS22	YKL193C	Protein phosphatase 1 regulatory subunit SDS22	P36047	No	No	88.2	25.293	26.183	27.0025	27.6813	65.1954	28.4147	28.8699	28.7148	28.6545	12.8201	29.2458	28.6865	29.1307	28.9933	16.0103	29.7181	29.1854	29.57	29.6681	15.5599	30.2598	29.9735	29.6961	19.4726	2.12351	0.00676034	2.47413	0.00344611	2.99546	0.00131979	3.43655	0.00273574	472.641	875.907	1545.81	167.583	4113.95	5640.1	5065.23	4857.94	7319.04	4967.05	6757.75
SDO1	YLR022C	Ribosome maturation protein SDO1	Q07953	No	No	50.8	28.1225	28.0955	28.0253	27.8977	6.8207	27.3724	27.3405	27.2867	27.5828	9.29718	27.1658	26.9549	27.4436	27.4241	15.6156	27.0507	26.9631	27.1321	27.3128	10.5352	25.9971	27.1321	26.9704	36.8735	-0.639632	0.000234228	-0.788151	0.00079202	-0.92055	5.0408e-05	-1.33535	0.00692386	4619.38	4533.7	4318.39	267.701	2746.62	2686.39	2588.22	3177.7	2380.03	2056.45	2885.41
SDH3	YKL141W	Succinate dehydrogenase [ubiquinone] cytochrome b subunit, mitochondrial	P33421	No	No	15.7											27.4904					26.3856			27.4954	51.862																					3820.19
SDH1	YKL148C	Succinate dehydrogenase [ubiquinone] flavoprotein subunit, mitochondrial	Q00711	No	No	24.1	26.8955	26.7808	27.1284	26.8388	10.9565	26.699	26.8734	26.8028	26.7674	5.03847	26.6143	26.6271	26.7334	26.7206	4.28266	26.9322	26.7595	27.0847	27.2569	14.6881	27.2799	27.3501	26.3762	32.9948	-0.125258	0.18835	-0.237022	0.0279548	0.0974522	0.484062	0.0912023	0.755667	794.76	734.026	933.99	51.7494	693.537	782.664	745.295	727.215	654.003	659.86	710.28
SDC1	YDR469W	COMPASS component SDC1	Q03323	No	No	36
SDA1	YGR245C	Protein SDA1	P53313	No	No	14.9	27.5786			27.2013	18.3898	27.0767	27.184	27.1619	27.1453	3.17418	27.6449	27.7417	28.015	27.9011	11.4237	27.4719	27.3451	27.3093	27.2537	6.52247					-0.247947	0.109034	0.435747	0.0615247	-0.044931	0.75563			1034.62			53.9415	730.644	787.01	775.086	766.208	1083.24	1158.45	1400.12
SCY1	YGL083W	Protein kinase-like protein SCY1	P53009	No	No	14.3	26.0774		26.2304		7.49579	25.5261	25.9534	25.8305	25.3565	18.7341	25.8387	25.7239	25.5647	25.4932	10.8567	25.7669	25.8032	25.0169	25.827	23.4543	25.1771	25.6018	25.3622	14.8562	-0.487295	0.0817837	-0.498778	0.016649	-0.550399	0.138096	-0.773539	0.0194666	347.882		386.824		237.395	319.248	293.159	211.07	294.835	272.288	243.841
SCW4	YGR279C	Probable family 17 glucosidase SCW4	P53334	No	Yes	32.9	28.3052	28.9633	28.8336	28.9016	18.8927	28.8566	29.4423	29.1895	29.2416	16.276	29.2385	29.0829	29.4018	29.2435	9.02985	29.3131	29.2621	29.1452	29.3815	6.83007	29.0474	29.4836	29.1847	15.8108	0.431586	0.0674989	0.490757	0.0244449	0.524566	0.016393	0.487636	0.0665134	3691.34	5824.7	5323.88	377.957	5409.69	8118.43	6813.42	7064.27	7048.8	6328.41	7893.95
SCW11	YGL028C	Probable family 17 glucosidase SCW11	P53189	No	No	8.3																						25.1001
SCW10	YMR305C	Probable family 17 glucosidase SCW10	Q04951	No	No	15.4			25.2236						25.646				25.3908								25.7929				0.422365		0.167189				0.569314				432.853					580.077			486.038
SCT1	YBL011W	Glycerol-3-phosphate O-acyltransferase 1	P32784	No	No	4
SCS7	YMR272C	Ceramide very long chain fatty acid hydroxylase SCS7	Q03529	No	No	25.3			25.3022																			27.0066	26.3022	33.8547							1.35215				412.158
SCS3	YGL126W	FIT family protein SCS3	P53012	No	No	11.8		24.7877				25.7963	26.1998	26.3897	26.179	16.4044	26.3341		25.5463	25.8663	27.8686		26.2958	26.1569	26.0446	8.75372	26.2397	26.6979	26.2225	19.5716	1.35347		1.12788		1.37805		1.59899			303.018			609.657	806.389	919.821	794.849	885.096		512.671
SCS2	YER120W	Vesicle-associated membrane protein-associated protein SCS2	P40075	No	No	83.6	30.8478	31.3336	30.6468	31.1704	21.1967	31.0643	31.2457	31.193	31.1758	5.21347	31.2686	31.0614	31.2313	31.2	6.12497	31.3255	31.1129	30.973	31.3543	12.3348	31.1688	31.0416	31.3551	11.0225	0.170035	0.327744	0.190674	0.282296	0.191801	0.326386	0.188845	0.385284	32089.5	44936.9	27914.9	2717.68	37283.6	42280.1	40762.4	40280.8	42955.9	37208.8	41861.6
SCP160	YJL080C	Protein SCP160	P06105	No	No	79.1	33.5948	33.7398	33.7124	33.589	5.43346	33.3875	33.4634	33.4215	33.4307	2.16266	33.2818	33.2536	33.3543	33.3109	2.99018	33.132	33.0215	33.0295	33.0084	4.00694	32.735	32.9021	32.8102	5.81482	-0.233213	0.00147132	-0.358836	0.00019913	-0.611149	1.50659e-05	-0.843231	3.70158e-05	43024.6	47574.8	46679.4	2902.06	37267.2	39280.3	38156	38398.1	34633.9	33964	36418.2
SCP1	YOR367W	Transgelin	Q08873	No	No	29	26.366		26.5561	25.9621	20.1763	26.7338	27.1528	26.8485	26.7309	14.4855	26.8491		27.1093	26.5511	19.1455	26.7958	26.2143	26.7111	26.1891	22.029	26.984	26.918		3.23666	0.571727	0.0286101	0.541732	0.0852097	0.18279	0.48007	0.656239	0.0632515	1699.91		1939.3	87.0096	2193.41	2932.6	2375.01	2189.09	2376		2845.54
SCO1	YBR037C	Protein SCO1, mitochondrial	P23833	No	No	8.1		25.8992				25.9256	26.2995	26.2946	26.1944	11.563	26.7734	26.4617			15.2173						26.2264		25.261	45.626	0.279343		0.718399				-0.155508			843.596			859.179	1113.39	1109.62	1035.13	1546.35	1245.89
SCL1	YGL011C	Proteasome subunit alpha type-1	P21243	No	No	65.1	29.8197	29.9673	30.22	29.961	11.8574	30.39	30.5219	30.4064	30.4892	4.42568	30.4091	30.2943	30.2903	30.2426	4.97863	30.2921	30.4331	30.2564	30.2648	5.85801	30.6234	30.4354	30.4993	6.6878	0.459862	0.00210073	0.317089	0.0127499	0.31961	0.0138044	0.527372	0.00468881	15130.6	16760.6	19968.4	1130.1	22465.7	24616.4	22722.7	24065.6	22765.9	21023.8	20966.4
SCH9	YHR205W	Serine/threonine-protein kinase SCH9	P11792	No	No	21.8	28.1388	27.2979	28.1165	27.6411	26.6061	27.454	27.5811	27.7406	26.8329	24.6464	27.1955	27.1578	27.5845	27.4559	14.3556	27.148	27.5924	27.7517	27.2874	19.0834	26.5022	27.2414	26.9988	24.8134	-0.396454	0.21173	-0.450167	0.0948237	-0.353711	0.199177	-0.884449	0.0322946	1439.26	803.513	1417.2	69.0324	895.308	977.802	1092.1	582.133	748.484	729.151	980.091
SCD6	YPR129W	Protein SCD6	P45978	No	No	56.2	28.1088	28.5357	28.3785	28.4858	12.6005	28.5223	28.6826	28.6136	28.7704	7.2789	28.8002	28.5729	28.3538	28.4781	13.3706	28.6632	28.7383	28.8109	28.6232	5.79189	28.9289	28.7119	28.6669	9.93519	0.270018	0.0477129	0.174042	0.241913	0.331691	0.0188064	0.392005	0.0307453	3302.47	4439.45	3981.28	290.429	4398.38	4915.42	4685.88	5223.8	5332.75	4555.59	3913.51
SCD5	YOR329C	Protein SCD5	P34758	No	No	7.9
SBP1	YHL034C	Single-stranded nucleic acid-binding protein	P10080	No	No	78.2	30.9671	31.7257	31.6457	31.5055	21.3818	31.6314	31.5938	31.7624	31.6179	5.36323	31.8291	31.7069	31.7739	31.6537	5.31211	31.6272	31.5482	31.4884	31.5464	3.97083	31.265	31.354	31.4898	7.901	0.19037	0.318278	0.279904	0.160933	0.0915549	0.615976	-0.0914161	0.680581	28448.7	48130.1	45534.8	2798.01	45084.8	43924.7	49371.6	44663.3	51705.4	47506.7	49766
SBH2	YER019C-A	Protein transport protein SBH2	P52871	No	No	42			26.4066	26.1204	13.9793	27.4553		26.0087	28.2517	66.2714	27.2602	27.6822			20.5372	28.5615	27.4621	27.2373	27.6991	44.8794	27.4347	27.6232		9.22551	0.975089	0.336538	1.20776	0.0417821	1.47651	0.0290596	1.26545	0.0178412			4140.2	229.94	8564.88		3142.32	14875.7	7481.82	10024
SBH1	YER087C-B	Protein transport protein SBH1	P52870	No	No	37.8	28.3412	28.0096		28.1691	11.5031	28.9917	29.1773	29.044	28.8116	10.3687	28.9038	29.1182	29.0003	28.755	10.5665	29.0601	28.4481	28.563	28.6566	19.5738	29.2807	28.2345	28.5914	38.1072	0.832871	0.000960104	0.771033	0.00141712	0.508647	0.0346129	0.528916	0.175415	17453.5	13868.9		1049.04	27396.6	31158.2	28407.7	24181.6	25777.8	29906.3	27559.8
SBE22	YHR103W	Protein SBE22	P38814	No	No	6.6			25.3671	24.9249	21.504	25.3538	25.4031			2.41664															0.232479	0.405694									200.721	10.005	198.884	205.8
SBA1	YKL117W	Co-chaperone protein SBA1	P28707	No	No	32.9	30.6113	30.3143	30.1895	30.2977	13.0694	30.7045	30.3878	30.6867	30.4932	10.5159	30.6366	30.9037	31.0215	30.9264	10.9718	30.3897	30.5836	30.5847	30.5432	6.22634	30.4255	30.5099	30.5044	3.24139	0.214849	0.119998	0.518838	0.00544268	0.172091	0.140941	0.126735	0.298731	30454.2	24787.8	22734.4	1659.46	32485.4	26083.7	32088.1	28061	30992.6	37295.9	40468.9
SAY1	YGR263C	Steryl acetyl hydrolase 1	P53324	No	No	16.5																						24.3118
SAT4	YCR008W	Serine/threonine-protein kinase HAL4/SAT4	P25333	No	No	8.1			27.3243																																1127.04
SAS10	YDL153C	Something about silencing protein 10	Q12136	No	No	32.1	28.4904	28.8421	28.8212	28.5552	12.4263	27.6583	27.452	27.9013	27.7659	12.9216	27.1376	27.0043	27.1333	27.2162	6.00375	27.455	27.0513	27.2385	27.163	12.0856	27.1776	27.1069	26.7988	13.4353	-0.982847	0.000289144	-1.55437	4.57689e-06	-1.45028	2.36555e-05	-1.64946	9.01591e-05	2399.81	3062.25	3018.21	169.977	1347.98	1168.34	1595.27	1452.34	939.573	856.656	936.773
SAR1	YPL218W	Small COPII coat GTPase SAR1	P20606	No	No	70.5	30.5856	30.9713	30.1988	30.7457	21.6445	30.601	30.9562	30.863	30.8498	10.1373	30.8152	30.0623	30.1749	30.1987	25.9384	30.5276	30.4436	30.5404	30.8346	12.3927	30.8303	31.1995	31.0795	12.7469	0.192158	0.3257	-0.312585	0.232475	-0.0387982	0.839778	0.411096	0.111385	33585.2	43879.8	25687.6	2541.4	33945.8	43423.4	40705.4	40336.4	39379.7	23367.7	25264.5
SAP30	YMR263W	Transcriptional regulatory protein SAP30	P38429	No	No	23.4		26.0602	26.4047		16.8061		26.1131				26.3944					26.0454	26.0242		26.0771	1.84657	26.0166	25.9768	26.5332	22.637	-0.119342		0.161959		-0.183518	0.252645	-0.0569304	0.843434		1358.54	1724.98			1409.3			1712.71
SAP190	YKR028W	SIT4-associating protein SAP190	P36123	No	No	8.5	27.2464	26.3317	26.4094		37.7533		26.9982	26.8875		5.42243	27.4274	27.3732		26.738	24.3292		27.23	26.6357	26.9467	20.3953			26.6701		0.280346	0.514423	0.517037	0.23173	0.274962	0.463303	0.00755981		607.91	322.461	340.292			511.81	474.011		689.159	663.73
SAP185	YJL098W	SIT4-associating protein SAP185	P40856	No	No	12				26.7928		26.0889		26.0372		2.5343	27.3333	26.0677		26.3365	49.3756	26.2993	26.1254	26.3359	27.079	32.6551	26.146	26.5414	26.6915	18.6771	-0.729761		-0.213619		-0.332885		-0.333131					28.9964	262.854		253.599		622.764	259.016
SAP155	YFR040W	SIT4-associating protein SAP155	P43612	No	No	14.8			26.3788					26.2671				26.5642	26.8511	26.9492	13.4235	26.4771	26.5588		26.6081	4.56047	25.8617	26.5999	26.4408	24.9805	-0.111685		0.409402		0.169236		-0.0779569				339.232				313.961			385.753	470.654
SAP1	YER047C	Protein SAP1	P39955	No	No	11.6
SAM50	YNL026W	Sorting assembly machinery 50 kDa subunit	P53969	No	No	33.3								26.4914	26.4466	2.19368		26.0922				26.0132	26.1295			5.69662	26.7262	27.2175	26.7231	20.7009															775.267	751.583		587.883
SAM4	YPL273W	Homocysteine S-methyltransferase 2	Q08985	No	No	50.8	29.9254	29.7445	29.9599	29.6446	10.2596	29.0419	29.3486	29.3742	29.1463	10.9916	29.1488	29.0142	28.9466	29.0329	5.89591	29.3987	29.351	29.1157	29.1658	9.55128	29.3579	29.3282	29.0442	11.5756	-0.590857	0.00168337	-0.782975	9.72833e-05	-0.560798	0.00150165	-0.575158	0.00522698	12432	10967.6	12733.2	693.046	6739.21	8335.4	8484.28	7244.49	7257.29	6610.82	6308.19
SAM37	YMR060C	Sorting assembly machinery 37 kDa subunit	P50110	No	No	20.2							25.5845							25.1197							25.5037	25.8086		14.8914														600.021
SAM35	YHR083W	Sorting assembly machinery 35 kDa subunit	P14693	No	No	26.7
SAM3	YPL274W	S-adenosylmethionine permease SAM3	Q08986	No	Yes	21	27.0991		26.954		7.10284		27.4149		27.4269	0.586353	27.6546	26.7116	27.4305	27.6271	26.4691	27.4022	27.4054	28.0323	27.8892	22.6045	27.2566	27.5789	27.6622	14.2714	0.394315	0.0324079	0.329402	0.379495	0.655721	0.0580492	0.47268	0.0676045	998.776		903.248			1243.19		1253.54	1467.94	763.533	1256.74
SAM2	YDR502C	S-adenosylmethionine synthase 2	P19358	No	No	53.9	31.6191	31.883	31.4333	31.7108	12.9349	31.4917	31.5475	31.4799	31.453	2.77648	31.3522	31.3339	31.3542	31.1074	7.9756	30.911	30.8317	30.6562	30.8524	7.39515	30.3762	30.3203	30.1381	8.45356	-0.168546	0.129005	-0.374625	0.0151076	-0.848753	0.000231356	-1.38337	0.000109635	34899.9	41905.5	30682.4	2518.64	31949.9	33210.1	31689.7	31103.5	29005.3	28640.3	29045.5
SAM1	YLR180W	S-adenosylmethionine synthase 1	P10659	No	No	54.7	33.7085	33.9494	33.4664	33.6848	13.7635	33.4229	33.2002	33.449	33.4719	8.34397	33.1005	33.1397	33.2371	33.0376	5.83929	32.8237	32.891	32.8577	32.8544	1.90744	32.9368	32.8237	32.7896	5.40332	-0.316257	0.0354525	-0.573544	0.00174867	-0.845585	0.000147172	-0.852203	0.000948876	150076	177349	126886	9997.69	123122	105509	125368	127378	98467	101177	108240
SAH1	YER043C	Adenosylhomocysteinase	P39954	No	No	61.9	35.1009	35.0114	35.2163	34.9175	8.87099	34.5137	34.4407	34.5063	34.5846	4.08446	34.318	34.1842	34.2355	34.2715	3.91554	33.9561	34.0409	34.0859	33.9914	3.94257	33.9369	33.8159	33.7036	8.09481	-0.55021	0.000228051	-0.809223	2.46522e-05	-1.04293	5.64864e-06	-1.24271	4.46157e-05	335368	315191	363291	20000.7	223224	212212	222095	234473	194910	177654	184080
SAF1	YBR280C	SCF-associated factor 1	P38352	No	No	10.2		27.7362					28.8004	28.2757	28.4539	18.9157				28.9493			28.5858		28.9405	17.2987			28.3141		0.773782		1.21305		1.02695		0.577847			1417.99				2964.98	2060.96	2331.97
SAC7	YDR389W	GTPase-activating protein SAC7	P17121	No	No	11.8	26.3054								26.3734		26.5527		26.4443		5.3112							25.3914			0.0679427		0.193053				-0.914015		503.585							527.868	597.73		554.459
SAC6	YDR129C	Fimbrin	P32599	No	No	67.8	31.8409	32.0404	31.9461	32.0011	5.91719	32.1766	32.5624	32.4369	32.2552	12.1693	32.5639	32.3744	32.6095	32.4684	7.17703	32.4571	32.4419	32.3236	32.5921	7.6462	32.2841	32.3684	32.2385	4.59531	0.400658	0.00628052	0.546917	0.000195549	0.496543	0.00039242	0.3399	0.00244008	23960.6	27514.5	25774.6	1813.27	30239.2	39509.7	36218.8	31931.1	39550.9	34682	40820.4
SAC3	YDR159W	Nuclear mRNA export protein SAC3	P46674	No	No	7.5	28.3131	28.4278	29.1025	28.1407	32.1596	29.7975	28.7752	29.4665	29.0224	31.5847	31.1017	31.021	30.9205	30.9201	6.1498	30.487	29.8851	29.7505	29.7452	26.9604	25.2183				0.769358	0.0478243	2.49478	2.47477e-05	1.47092	0.00173636	-3.27773		996.897	1079.4	1723	59.9069	2789.34	1373.27	2217.42	1629.89	6888.3	6513.16	6074.94
SAC1	YKL212W	Phosphoinositide phosphatase SAC1	P32368	No	No	57.8	30.0733	30.1319	30.0234	29.9673	4.86674	29.5709	30.0156	30.0287	29.9436	13.9155	29.7889	29.5662	29.6137	29.523	8.31645	29.7333	29.707	29.7046	29.7664	2.00828	29.8587	30.0077	29.7117	10.2493	-0.15926	0.209971	-0.426005	0.000773367	-0.321132	0.00014861	-0.18959	0.0703804	7101.43	7395.62	6860.04	446.87	5013.31	6822.96	6885.19	6491.05	5831.07	4996.9	5164.17
RXT3	YDL076C	Transcriptional regulatory protein RXT3	Q07458	No	No	21.8												26.1977																														1017.76
RXT2	YBR095C	Transcriptional regulatory protein RXT2	P38255	No	No	28.6	25.7456																																517.235
RVS167	YDR388W	Reduced viability upon starvation protein 167	P39743	No	No	46.5	29.8752	29.9373	29.8827	29.7711	4.75132	30.3539	30.4154	30.4059	30.336	2.68781	30.5058	30.3364	30.4553	30.3893	5.14118	30.5994	30.4151	30.5048	30.4093	6.28786	30.728	30.4423	30.5064	10.6221	0.511195	1.36106e-05	0.555089	3.49111e-05	0.615559	3.60079e-05	0.692299	0.000410805	8342.75	8709.92	8386.46	525.674	11625.9	12131.7	12052.1	11481.9	12916.2	11485.3	12472.3
RVS161	YCR009C	Reduced viability upon starvation protein 161	P25343	No	No	72.1	28.2373	28.6173	28.7831	28.6864	15.5057	29.3528	29.4123	29.2869	29.1952	6.40552	29.5715	29.5677	29.4798	29.3741	6.33797	29.4893	29.4619	29.3126	29.5221	6.25116	29.1066	29.2788	29.3324	8.02201	0.730806	0.00126317	0.917266	0.000376704	0.865443	0.000514629	0.658242	0.00759274	4676.68	6085.95	6827.46	432.395	10133.4	10560	9681.03	9084.65	11791.5	11761	11065.9
RVB2	YPL235W	RuvB-like protein 2	Q12464	No	No	63.7	30.0307	29.7908	29.5713	29.6612	14.2458	29.931	30.0206	29.8877	29.9344	3.90068	30.068	29.8329	30.1069	30.0206	8.14197	30.1197	29.7112	29.9902	30.0521	11.8435	29.8138	29.7895	29.7064	3.86686	0.179931	0.133148	0.243614	0.0821019	0.204812	0.177734	0.00642939	0.959742	9501.32	8046.06	6910.29	498.09	8867.21	9435.48	8604.81	8888	9750.81	8284.12	10016.8
RVB1	YDR190C	RuvB-like protein 1	Q03940	No	No	72.6	30.0526	30.2034	30.4024	29.8889	15.2439	30.046	30.1135	30.0786	29.8931	6.55522	30.1182	30.2034	30.1609	30.1972	2.70391	29.9844	29.8383	30.1886	30.1046	10.4093	29.9762	29.9248	30.0222	3.37442	-0.104026	0.418053	0.0330708	0.776015	-0.107858	0.449179	-0.16242	0.271729	9868.47	10955.8	12576.6	596.649	9823.27	10293.8	10048.4	8835.98	10327.5	10955.8	10637.7
RUP1	YOR138C	UBA domain-containing protein RUP1	Q12242	No	No	16.1	25.8839	26.237	26.0451	25.3868	23.4128		26.7574	26.5736	26.3428	14.2457	26.2138	26.5587	26.466	26.2583	11.4694	26.4309	26.8576	26.7068	27.2758	25.1792	26.7358	27.7316	27.0169	37.28	0.669684	0.0371865	0.485987	0.0510445	0.929514	0.0104925	1.27323	0.0116874	367.363	469.229	410.797	17.6274		673.014	592.53	504.921	461.748	586.431	549.956
RUD3	YOR216C	GRIP domain-containing protein RUD3	Q12234	No	No	33.1								25.7472																															449.111
RUB1	YDR139C	NEDD8-like protein RUB1	Q03919	No	No	40.3											28.1325								27.5333																						15134.1
RTT106	YNL206C	Histone chaperone RTT106	P40161	No	No	9.5																	25.4182
RTT103	YDR289C	Regulator of Ty1 transposition protein 103	Q05543	No	No	28.9	26.1375	26.457	26.5375	26.6991	15.7224	26.7482	26.9189	26.6065	26.8761	9.57107	26.8579	27.1701	27.0739	26.8648	10.8481	26.7057	27.0057	27.0087	26.9914	9.74915	26.9496	26.5522	26.9444	15.0231	0.329645	0.0533585	0.533892	0.00920859	0.470105	0.0149924	0.3576	0.100544	709.967	885.927	936.793	70.9608	1084.07	1220.26	982.707	1184.58	1169.77	1452.32	1358.65
RTT102	YGR275W	Regulator of Ty1 transposition protein 102	P53330	No	No	73.2	27.6132	28.1819	27.3124	27.6106	26.757	27.5992	28.0743	27.8606	27.6613	15.2372	27.956	27.9332	28.1442	28.0498	6.76502	28.2254	28.2878	27.7331	28.1758	16.096	27.5301	28.0003	27.9113	16.4979	0.119366	0.592271	0.341304	0.11942	0.426001	0.102532	0.134401	0.609107	5158.39	7651.15	4187.77	348.71	5108.89	7101.14	6123.74	5333.52	6542.34	6439.57	7453.91
RTT10	YPL183C	Regulator of Ty1 transposition protein 10	Q08924	No	No	12.2	25.3043		24.8723		21.0196				25.3469		25.5193						25.4347				25.525	25.7458	25.28	16.0292	0.258572		0.430982		0.346413		0.428657	0.167978	161.846		119.961					166.69	187.849
RTS3	YGR161C	Protein phosphatase type 2A regulatory subunit RTS3	P53289	No	No	28.9						24.9001											24.9267	25.092		8.08946		24.8384	25.3457	24.6108													478.354
RTS1	YOR014W	Serine/threonine-protein phosphatase 2A 56 kDa regulatory subunit delta isoform	P38903	No	No	28.1	28.5147	27.6131	28.6537	27.8157	34.3418	28.1125	27.3985	27.2687	27.3464	30.2971	27.8775	28.235	28.1501	28.4296	15.5608	27.9343	28.3572	28.4017	28.1873	14.089	28.2567	28.3273	28.343	3.15994	-0.617759	0.103606	0.0237956	0.935157	0.0708292	0.806775	0.159753	0.62144	2009.34	1075.58	2212.52	83.823	1520.51	926.944	847.149	894.041	1291.97	1655.27	1560.64
RTN2	YDL204W	Reticulon-like protein 2	Q12443	No	No	47.1	24.827					29.6546	29.6122	29.1989	29.6358	13.9919	28.4423	29.1234	28.5048	29.0683	24.6365	27.8529	27.9292	28.0622	27.9845	6.12649	25.387	25.4016	23.8499	48.5888	4.69835		3.95767		3.13018		0.0524519		299.988				8518.05	8271.51	6211.12	8407.98	3676.19	5894.63	3838.97
RTN1	YDR233C	Reticulon-like protein 1	Q04947	No	No	63.1	32.1375	32.5043	32.8086	32.5016	18.7171	32.503	32.6716	32.6702	32.6284	5.37894	32.6047	32.4319	32.5672	32.4698	5.61138	32.5319	32.5569	32.5099	32.5036	1.68115	32.4159	32.4481	32.3515	3.39259	0.130278	0.397094	0.0303768	0.838945	0.0375461	0.794401	-0.0828407	0.63525	64170.9	82751	102183	5593.43	82674.9	92923.2	92830.8	90180.8	88715.2	78696.5	86434.6
RTK1	YDL025C	Probable serine/threonine-protein kinase RTK1	Q12100	No	No	33.4	25.566		26.3932		39.4697						26.6914	26.8733		27.1307	15.4481	26.5461	26.8342			14.0753	26.7081	26.9232	26.5531	12.9869			0.918858	0.078357	0.710604	0.24618	0.748554	0.113597	319.023		566.038						696.003	789.515
RTG3	YBL103C	Retrograde regulation protein 3	P38165	No	No	17.1			24.2418																																163.827
RTG2	YGL252C	Retrograde regulation protein 2	P32608	No	No	46.4	27.9355	27.9812	27.9932	27.6336	11.1233	27.8897	28.2618	28.1647	28.3008	12.2279	28.4046	27.757	28.0362	28.1333	18.4644	28.0195	28.1075	28.2057	28.2856	8.00932	27.9481	28.4698	28.2614	17.8054	0.268368	0.07682	0.196907	0.26026	0.268699	0.0399977	0.34056	0.0893407	1750.23	1806.62	1821.76	96.1532	1695.62	2194.46	2051.61	2254.66	2422.88	1546.57	1876.85
RTF1	YGL244W	RNA polymerase-associated protein RTF1	P53064	No	No	33.3	28.42	26.9397	27.8869	26.2289	61.7175	28.4965	27.9333	27.601	26.2257	54.2806	29.1624	29.0918	28.1204	28.2859	35.9323	28.9565	28.9061	28.7016	28.9777	8.4226	28.5387	28.532	28.8287	12.1112	0.195297	0.785602	1.29627	0.058961	1.51661	0.0215935	1.26428	0.0823339	2437.81	873.716	1684.65	36.1522	2570.58	1739.76	1381.85	532.674	4078.34	3883.53	1980.66
RTC5	YOR118W	Restriction of telomere capping protein 5	Q12108	No	No	12.3																						24.1032
RTC3	YHR087W	Restriction of telomere capping protein 3	P38804	No	No	40.5	26.1945	25.0268	26.8405	25.88	49.0641	29.8377	29.5929	29.5803	29.6952	8.4318	29.8415	29.8137	29.5247	29.3531	15.9558	29.2728	29.4888	29.364	29.4772	6.99804	29.2741	28.7839	28.9988	17.1448	3.69105	7.00118e-05	3.64779	9.08602e-05	3.41527	0.000106689	3.03344	0.00122307	2859.07	1272.67	4473.92	155.701	35721	30147.3	29884.8	32361.4	35816.3	35133.5	28754.9
RSR1	YGR152C	Ras-related protein RSR1	P13856	No	No	36.4	27.06	25.6699	27.3471	26.6843	42.4928	27.5919	26.9216	26.0331	26.5012	46.9356	27.5158	27.5615	27.6016	28.1077	20.812	27.6453	27.7879	27.5291	27.1248	18.5451	27.1954	27.271	27.0525	7.59913	0.0716264	0.889358	1.00632	0.0422695	0.831453	0.0787251	0.482603	0.319325	2058.49	785.394	2511.61	107.444	2976.21	1870.17	1010.24	1397.38	2823.21	2914.13	2996.22
RSP5	YER125W	E3 ubiquitin-protein ligase RSP5	P39940	No	No	51.7	30.2792	30.4008	30.4237	30.4952	6.15091	30.4623	30.5426	30.5529	30.5462	2.91647	30.7919	30.494	30.792	30.8246	10.1868	30.6324	30.643	30.6669	30.7007	2.10961	30.3107	30.5509	30.4519	8.2977	0.126245	0.0442149	0.325862	0.010905	0.26102	0.00150858	0.0380922	0.649642	6344.97	6903.02	7013.55	499.115	7203.46	7615.91	7670.45	7634.9	9052.42	7363.67	9052.9
RSN1	YMR266W	Uncharacterized protein RSN1	Q03516	No	No	15.2	26.5372	26.9504	26.2074	26.6217	21.1125	26.7506	27.2713	27.024	27.067	14.5786	27.6347	27.5511	27.8779	27.7522	9.93475	27.4748	27.3411	27.8678	27.7343	16.5374	27.8477	27.9182	27.5873	11.7081	0.449049	0.052706	1.12477	0.00054563	1.0253	0.00185919	1.20521	0.00178032	404.399	538.489	321.757	29.0382	468.853	672.655	566.684	583.834	865.328	816.579	1024.2
RSM7	YJR113C	37S ribosomal protein S7, mitochondrial	P47150	No	No	21.9	25.888	25.8728		26.2296	14.4971	26.0402																26.2762			0.0434219						0.279367		998.118	987.606		85.6536	1109.17
RSM28	YDR494W	37S ribosomal protein RSM28, mitochondrial	Q03430	No	No	19.7
RSM25	YIL093C	37S ribosomal protein S25, mitochondrial	P40496	No	No	25			26.1339																		26.3007										0.166833				1078.94
RSM24	YDR175C	37S ribosomal protein S24, mitochondrial	Q03976	No	No	32.6	26.2832	26.7691	26.7356	25.8302	28.4082	26.5056	26.4855	26.079		15.8181	26.2123			26.3941	8.89503	26.1701			26.5063	16.4041	26.7213	26.4964		10.9989	-0.0478087	0.873955	-0.101323	0.778282	-0.0663345	0.857862	0.204342	0.579002	976.414	1367.48	1336.03	48.307	1139.14	1123.44	847.581		929.627
RSM23	YGL129C	37S ribosomal protein S23, mitochondrial	Q01163	No	No	25.1			26.8251									28.3411											26.4257				1.51603				-0.399308				1045							2988.74
RSM19	YNR037C	37S ribosomal protein S19, mitochondrial	P53733	No	No	52.7							24.9053				24.5579			24.4825	3.69278				24.7849																			1367.26			1074.68
RSM10	YDR041W	37S ribosomal protein S10, mitochondrial	Q03201	No	No	27.1	25.2128		25.2345		1.06297														24.6356										-0.588073				742.236		753.479
RSE1	YML049C	Pre-mRNA-splicing factor RSE1	Q04693	No	No	8.1	25.9004																																182.1
RSC9	YML127W	Chromatin structure-remodeling complex subunit RSC9	Q03124	No	No	23.9	26.2206	26.195	26.0785	26.4092	9.66419	26.9361	26.8381	26.6181	26.7214	9.5648	26.7961	26.5698	27.1672	27.2776	22.1506	26.6899	26.7313	27.2411	26.698	20.1952	26.7345	26.512	26.7447	8.86484	0.552607	0.00128643	0.72686	0.00642851	0.614278	0.00648373	0.43795	0.00807023	536.058	526.631	485.793	41.3749	880.244	822.452	706.115	758.559	798.869	682.881	1033.19
RSC6	YCR052W	Chromatin structure-remodeling complex protein RSC6	P25632	No	No	34.4	27.5584	27.0518	27.3777	26.6077	27.1968	26.9947	27.1176	26.8671	26.7393	11.2711	26.3517	27.813	27.7046	27.6519	36.6814	27.0166	27.1391	27.0768	27.1661	4.60279	27.2385	26.7239	26.3602	30.9806	-0.219193	0.365623	0.231421	0.586451	-0.0492409	0.823493	-0.374708	0.302608	1631.57	1148.36	1439.49	57.1646	1103.87	1202.01	1010.43	924.746	706.895	1946.4	1805.58
RSC58	YLR033W	Chromatin structure-remodeling complex protein RSC58	Q07979	No	No	48.4	27.2927	27.2099	27.3726	27.0254	10.0679	27.4455	27.2985	27.4929	27.1267	11.1669	27.383	27.2294	27.6974	27.4529	13.7977	27.1469	27.7886	27.6405	27.2439	21.2985	26.8521	27.6193	27.6294	27.7718	0.115734	0.33774	0.215541	0.129337	0.2298	0.228013	0.141798	0.568902	1271.87	1200.94	1344.28	71.5649	1413.91	1276.98	1461.17	1133.63	1354.03	1217.26	1683.74
RSC4	YKR008W	Chromatin structure-remodeling complex subunit RSC4	Q02206	No	No	24.5	27.1597	27.9254	27.5854	27.6038	21.1639	27.6171	27.3809	27.5248	27.3719	8.28832	27.5625	27.6139	27.7292	27.9006	10.6188	27.2198	27.4169	27.6253	27.6113	12.8484	27.0947	27.3443	27.1123	9.90413	-0.0948964	0.592343	0.132983	0.473721	-0.100214	0.605291	-0.384833	0.109061	927.276	1576.49	1245.54	85.4319	1273.19	1080.9	1194.27	1074.23	1225.94	1270.34	1376.1
RSC30	YHR056C	Chromatin structure-remodeling complex protein RSC30	P38781	No	No	13.7	25.8026	25.8277	25.7415	25.5521	8.34766	25.6188	25.5694	25.808	25.5997	7.72732		25.4787	25.8101		16.1736	25.3266		25.4958	25.6216	10.1699	25.7538	25.5191	25.6141	8.23828	-0.0819998	0.358262	-0.0865566	0.564446	-0.249676	0.0593034	-0.101953	0.323914	258.241	262.763	247.536	14.7008	227.342	219.7	259.202	224.363		206.308	259.591
RSC2	YLR357W	Chromatin structure-remodeling complex subunit RSC2	Q06488	No	No	32.6	26.3746	25.8845	26.7046	26.468	22.3957	26.9728	26.8442	26.9457	27.092	7.09385	27.2806	27.1544	26.9796	26.847	13.1829	26.8428	27.0747	27.1715	26.9437	9.99262	26.7599	26.6413	26.4364	11.1598	0.605754	0.0150565	0.707443	0.0115062	0.650233	0.0131692	0.254598	0.297059	380.24	270.73	477.993	27.4743	575.628	526.548	564.921	625.232	712.51	652.853	578.338
RSC1	YGR056W	Chromatin structure-remodeling complex subunit RSC1	P53236	No	No	8.2							24.4175		25.0717	31.5251								25.3119			24.4377																	93.9203		147.805
RSA4	YCR072C	Ribosome assembly protein 4	P25382	No	No	27	27.0459	27.3054	27.5786	27.3982	15.0688	26.4917	27.0227	26.4914	27.046	21.4875							26.2339	26.2777	26.257	1.51942	26.4852	26.613	26.6721	6.54429	-0.569063	0.0251912			-1.07582	0.000447077	-0.741935	0.00311069	1086.35	1300.39	1571.51	93.9173	739.836	1069.03	739.655	1086.43
RSA3	YLR221C	Ribosome assembly protein 3	Q05942	No	No	34.5	26.1749	26.1022	25.6088	25.9986	16.2793	25.4611	25.4753	25.7545	25.6194	9.71954	25.5674	25.5989	25.7054	25.458	7.04997	25.7481	26.0188	25.5387	25.7937	13.6955	25.5231	25.1057	25.5844	17.09	-0.393582	0.0337829	-0.38872	0.0288333	-0.196305	0.265732	-0.566699	0.0336356	1373.74	1306.21	927.898	82.3334	837.594	845.845	1026.47	934.698	901.623	921.515	992.126
RRT2	YBR246W	Diphthamide biosynthesis protein 7	P38332	No	No	22.2																		26.5382	26.3078	11.2671	26.0321
RRT14	YIL127C	Regulator of rDNA transcription protein 14	P40470	No	No	24.8	25.2504	26.2222	25.4271	26.0542	31.9747	24.7562	24.4315	24.9743	25.0096	17.4231	24.8523	26.1145	25.6443	25.8778	33.1534		25.8248	24.9291	24.5709	47.0481		24.6219	24.5088	5.54415	-0.945542	0.0129762	-0.116229	0.758836	-0.630194	0.192685	-1.1731	0.0300194	748.369	1467.77	845.907	88.4745	531.319	424.256	618.038	633.338	567.919	1362.19	983.344
RRS1	YOR294W	Regulator of ribosome biosynthesis	Q08746	No	No	37.4	26.8926	27.5983		27.5897	25.5051											27.0171	27.0877		27.0782	2.63516	26.9942	26.6512	26.9345	12.263					-0.29922	0.271636	-0.50026	0.123063	2425.79	3956.34		266.338
RRP9	YPR137W	Ribosomal RNA-processing protein 9	Q06506	No	No	26	29.9007	30.3347	30.0579	29.7798	17.1198	28.6196	28.4947	28.2	29.1784	30.034	29.2227	29.3737		27.9656	44.1059	29.2452	29.2978	29.3091	28.9912	9.84392			30.0297		-1.39509	0.00107495	-1.16425	0.0332221	-0.807436	0.00123644	0.0114682		6888.57	9306.41	7681.69	429.025	2834.53	2599.49	2119.29	4175.41	4305.65	4780.9
RRP8	YDR083W	25S rRNA (adenine(645)-N(1))-methyltransferase	P38961	No	No	23.7	26.1912	26.5663	26.2206	26.3686	12.2274	25.7287	24.9844	25.5726	25.3315	21.4868		25.5407					24.9009		25.2734	18.153			25.3403		-0.932389	0.00225577	-0.795939		-1.24951	0.00190657	-0.996357		744.917	966.145	760.259	57.0511	540.606	322.732	485.177	410.498		474.58
RRP7	YCL031C	Ribosomal RNA-processing protein 7	P25368	No	No	22.9	26.9699		27.0507		3.95815			26.3031	26.5459	11.8738		26.7246		26.6096	5.62927	26.4745	26.3191	26.3725	26.046	12.1735	25.7823	26.2441	26.1017	15.8631	-0.585803	0.0445474	-0.343231	0.0394111	-0.707343	0.00713149	-0.967662	0.0123724	1704.98		1803.16				1073.95	1270.81		1438.3
RRP5	YMR229C	rRNA biogenesis protein RRP5	Q05022	No	No	51.9	31.8739	31.9269	31.9448	31.7793	5.07165	31.1272	31.2272	31.1581	31.3024	5.4458	30.9516	30.8963	31.0843	30.9779	5.53479	30.7786	30.8801	30.8489	30.7935	3.29445	30.469	30.6407	30.5104	6.29078	-0.677491	1.54237e-05	-0.903702	2.96435e-06	-1.05593	3.47054e-07	-1.34121	3.81609e-06	9110.87	9451.41	9569.24	577.849	5429.58	5819.42	5547.18	6130.79	4807.54	4626.51	5270.54
RRP46	YGR095C	Exosome complex component RRP46	P53256	No	No	26	26.1159	26.3835	26.2779	26.2329	7.6572		26.2916		26.2051	4.23815	26.7		26.8595	26.1241	24.8878	26.1359	26.1545	26.2077	26.0427	4.71911	25.5477	26.3458		38.147	-0.00419524	0.963947	0.308647	0.179831	-0.117344	0.122041	-0.3058	0.301676	1332.16	1603.62	1490.47	97.838		1504.68		1417.12	1997.06		2230.43
RRP45	YDR280W	Exosome complex component RRP45	Q05636	No	No	19.3			25.0417					25.0303									25.0934	24.9621	24.9554	5.47443		25.0252	24.9789	2.26816	-0.0114485				-0.0381186		-0.0396501				454.69				451.096
RRP43	YCR035C	Exosome complex component RRP43	P25359	No	No	18.3	26.9812		27.0372		2.74259	27.6604		28.3789	27.8444	26.9966		28.5319				28.5409	28.4346	28.5063	27.4193	30.4463	26.7349	27.0641	27.5946	30.6969	0.952056	0.0420742	1.52271		1.21608	0.0397486	0.122052	0.731443	1345.82		1399.05		2154.96		3546.09	2448.14		3942.69
RRP42	YDL111C	Exosome complex component RRP42	Q12277	No	No	33.2	27.2105					26.9022	26.3197	26.6656	26.668	16.1482	26.7874			26.3015	23.5924	26.7827	27.0279	27.0175		9.33394		26.8195	26.5429	13.5135	-0.571603		-0.665995		-0.267765		-0.529301		2389.73				1929.94	1288.82	1638.04	1640.81	1782.37
RRP40	YOL142W	Exosome complex component RRP40	Q08285	No	No	42.5			25.8069																		25.7823	25.9546	25.5531	13.7929							-0.0435292				988.267
RRP4	YHR069C	Exosome complex component RRP4	P38792	No	No	52.4	25.8707	27.3234	26.682	26.7898	38.5668	26.8596	26.8554		26.6451	8.28252	26.7149					26.9971	26.549	27.1538	26.9607	16.7879	26.6255	26.9225	26.4475	16.9026	0.12023	0.751889	0.0484106		0.24868	0.475256	-0.00130583	0.997345	695.776	1904.4	1220.96	89.0987	1380.85	1376.88		1190.11	1249.08
RRP3	YHR065C	ATP-dependent rRNA helicase RRP3	P38712	No	No	33.5	28.2787	28.155	28.5657	28.3414	12.2034	28.052	27.887	27.617	28.0156	13.027	27.533	27.3731	27.7626	27.71	12.0515	27.701	27.5312	27.9677	27.0423	25.4911	27.6154	27.4706	27.3871	8.08376	-0.442302	0.0148347	-0.740548	0.000970183	-0.774659	0.010848	-0.844202	0.000768703	2601.42	2387.65	3173.87	183.992	2223.09	1982.8	1644.41	2167.73	1551.34	1388.62	1819.04
RRP17	YDR412W	Ribosomal RNA-processing protein 17	Q04031	No	No	20.9	26.3711		26.207	26.9585	28.7741	26.0091	26.9086	26.9402		32.1859							26.7213		27.0219	14.68	26.399	26.9031		24.4576	0.107126	0.792552			0.359397	0.336826	0.13888	0.717534	1387.18		1238.07	141.152	1079.38	2013.47	2058.06
RRP15	YPR143W	Ribosomal RNA-processing protein 15	Q06511	No	No	28.8	25.1817		25.1087	25.3625	9.20358				25.4383													25.0265			0.220661						-0.191143		603.114		573.368	46.2997				720.529
RRP14	YKL082C	Ribosomal RNA-processing protein 14	P36080	No	No	18	25.3042		25.4969	26.2061	34.8278																												366.932		419.364	46.4315
RRP12	YPL012W	Ribosomal RNA-processing protein 12	Q12754	No	No	22.6	28.0647	28.5895	28.5582	29.2926	36.6139	26.9525	27.4459	27.1454	27.0867	15.002	26.8235	27.4921	26.8788	26.5211	30.1797	26.3359	26.3478	26.139	27.9166	69.3036	27.3728	27.7031	27.6557	11.9437	-1.46862	0.001703	-1.69739	0.00195148	-1.9414	0.00705631	-1.04909	0.0198234	912.818	1313.26	1285.13	144.795	422.254	594.445	482.664	463.416	386.131	613.791	401.217
RRP1	YDR087C	Ribosomal RNA-processing protein 1	P35178	No	No	36.3	28.7559	30.0643	28.9729	29.368	42.8866											29.5414			29.4261	5.64677	28.3303	29.2571	29.2003	31.7456					0.193453	0.677893	-0.361079	0.431951	6104.08	15118.1	7094.9	631.867
RRF1	YHR038W	Ribosome-recycling factor, mitochondrial	P38771	No	No	16.5																						25.8689	25.785	4.10975
RRD1	YIL153W	Serine/threonine-protein phosphatase 2A activator 1	P40454	No	No	18.3	28.5483																																3892.96
RRB1	YMR131C	Ribosome assembly protein RRB1	Q04225	No	No	41.1	29.8532	30.0377	30.4197	30.03	17.3428	28.949	29.2407	28.9938	28.9181	10.6196	28.4484	28.2062	28.7247	28.89	20.5088	28.9783	29.0764	29.3888	28.9794	14.2025	28.7041	28.8856	28.7796	6.34998	-1.05976	0.000277797	-1.51783	0.000220161	-0.979456	0.000706178	-1.29542	0.000322133	7572.82	8605.98	11214.6	579.699	4046.42	4953.01	4173.92	3960.53	2859.91	2418.06	3463.63
RPT6	YGL048C	26S protease regulatory subunit 8 homolog	Q01939	No	No	75.3	29.8123	30.1357	29.9187	29.6324	14.6805	30.0567	30.4254	30.4263	30.2352	11.9609	30.5183	30.3386	30.451	30.3137	6.69462	30.231	30.2137	30.3004	30.5774	12.2676	30.2167	30.2557	30.0892	5.95388	0.411172	0.0243163	0.530645	0.00372851	0.455882	0.0148205	0.312465	0.063212	9310.35	11649.7	10023.1	556.616	11029.5	14241.1	14250	12482.2	15188.2	13409.6	14495.9
RPT5	YOR117W	26S protease regulatory subunit 6A	P33297	No	No	59.2	30.2303	30.0304	29.9713	29.9015	10.0861	30.2615	30.1971	30.088	30.14	5.18435	30.3894	30.1145	30.4782	30.3788	10.4291	30.0916	30.2665	30.4037	30.3001	8.83424	30.035	30.0756	30.1258	3.15921	0.138268	0.134529	0.3068	0.0271897	0.232063	0.0520316	0.0454159	0.622099	11670.5	10160.3	9752.59	629.285	11925.3	11404.6	10574.4	10962.6	13030.6	10769.9	13858
RPT4	YOR259C	26S protease subunit RPT4	P53549	No	No	63.6	30.1736	30.0519	30.4555	29.8877	17.0174	30.366	30.4144	30.4604	30.4382	2.78841	30.661	30.6564	30.6903	30.6789	1.09353	30.6605	30.4981	30.5009	30.5927	5.47837	30.3682	30.3269	30.1828	6.63565	0.277572	0.0623324	0.529498	0.00450978	0.420904	0.0156082	0.15046	0.359787	10958.4	10072.5	13323.8	608.717	12522	12949.1	13369	13164.5	15363.4	15314.6	15678.3
RPT3	YDR394W	26S protease regulatory subunit 6B homolog	P33298	No	No	52.6	30.021	30.1158	29.9871	30.035	3.82377	30.216	30.1135	30.2188	30.1908	3.36154	30.3904	30.0757	30.1879	30.1738	9.38468	30.2884	30.1851	30.2569	30.1749	3.83198	29.9411	30.0139	29.9855	2.53393	0.145055	0.00754436	0.167209	0.0578305	0.186549	0.00297513	-0.0595841	0.166502	10170.8	10861.6	9934.59	695.492	11642.9	10843.8	11665.4	11441.3	13138.5	10563.8	11418
RPT2	YDL007W	26S protease regulatory subunit 4 homolog	P40327	No	No	65.9	30.1155	30.5064	30.3775	30.1835	12.4936	30.4349	30.5975	30.5744	30.5626	4.95263	30.5484	30.3419	30.7372	30.4525	11.8098	30.479	30.4495	30.4895	30.3603	4.00237	30.25	30.2382	30.2414	0.423436	0.246644	0.0434266	0.224295	0.117105	0.148898	0.165011	-0.0525158	0.64114	10650.9	13965.5	12772.4	756.152	13290.7	14876.6	14640.3	14520.4	14378.5	12461.1	16389.2
RPT1	YKL145W	26S protease regulatory subunit 7 homolog	P33299	No	No	64.7	30.8501	30.6682	30.9466	30.5349	12.646	30.9158	30.7978	30.7991	30.8434	3.88653	30.8822	30.8809	30.9054	30.9394	1.90678	30.9148	30.6412	30.5174	30.6497	11.9903	30.4931	30.491	30.3732	4.69285	0.0890667	0.389842	0.151987	0.153483	-0.0692109	0.59805	-0.297528	0.0474583	16648	14675.8	17799.6	906.16	17423.8	16055.4	16069.1	16570.6	17022.1	17006.6	17298.2
RPS9B	YBR189W	40S ribosomal protein S9-B	P05755	No	No	15.9	35.1032	34.821	34.9335	34.8598	8.88624	34.2446	34.0245	34.0605	34.1613	6.96438	33.5498	33.661	33.6118	33.6069	3.14548	33.3584	33.3453	33.4129	33.3439	2.27496	33.0534	32.9801	32.8311	7.74963	-0.806619	5.5007e-05	-1.32197	1.04869e-06	-1.56424	3.24292e-07	-1.97447	4.06595e-06	740017	608543	657889	42335.1	408115	350369	359231	385217	252140	272331	263208
RPS9A	YPL081W	40S ribosomal protein S9-A	O13516	No	No	12.7								24.6817																															536.102
RPS8B;RPS8A	RPS8B;RPS8A	40S ribosomal protein S8-B;40S ribosomal protein S8-A	P0CX40	No	No	75	34.27	34.5178	34.3337	34.699	13.658	34.2956	33.7901	34.1354	34.1672	14.195	33.7693	33.7553	33.8542	33.914	5.2062	33.4979	33.5377	33.6666	33.4121	7.415	33.2891	33.1468	33.3193	6.27797	-0.358028	0.0485664	-0.63189	0.000891472	-0.92654	0.000155305	-1.20337	0.000188931	411826	489002	430434	37550	419221	295306	375146	383516	291071	288268	308725
RPS7B	YNL096C	40S ribosomal protein S7-B	P48164	No	No	54.2	33.4254	32.5602	33.3489	32.5754	32.074	31.7012	31.6226	31.5293	31.5138	6.10971	30.4637	30.9188	30.7087	30.6274	13.2463	30.4848	30.4584	30.6274	30.3885	7.07543	31.0072	30.9392	30.8675	4.83558	-1.38577	0.00120561	-2.29785	0.000105076	-2.48771	4.98377e-05	-2.03953	0.000795162	238406	130875	226089	8957.4	72154.2	68330.9	64053	63364.8	30602.6	41950.5	36265.2
RPS7A	YOR096W	40S ribosomal protein S7-A	P26786	No	No	65.3	34.8325	34.3854	35.1248	34.5683	22.6726	34.1558	33.8261	34.0126	34.0115	9.2634	33.2963	33.6177	33.4799	33.571	9.56173	33.1783	33.2803	33.1752	33.0794	5.69566	33.3048	33.1521	33.3392	6.7819	-0.726259	0.00595498	-1.23653	0.000415238	-1.54947	8.6232e-05	-1.46238	0.000691253	632615	464029	774671	35672.5	395751	314901	358366	358076	218109	272553	247719
RPS6B;RPS6A	RPS6B;RPS6A	40S ribosomal protein S6-B;40S ribosomal protein S6-A	P0CX38	No	No	79.7	35.1086	35.2894	35.2514	35.1204	6.34844	34.3702	34.356	34.3382	34.3183	1.55355	33.8638	33.8242	33.7068	33.7522	4.88228	33.6008	33.5253	33.499	33.5409	3.01274	33.5487	33.4639	33.4719	3.27264	-0.846763	1.90381e-06	-1.40569	3.16287e-07	-1.65094	5.49191e-08	-1.69759	9.22524e-07	613537	695450	677382	41890.1	367748	364154	359699	354764	258889	251884	232192
RPS5	YJR123W	40S ribosomal protein S5	P26783	No	No	76.4	34.5774	34.1448	34.4823	34.142	15.7026	33.9969	33.9159	33.994	33.918	3.14088	33.7266	33.5612	33.6917	33.6141	5.16519	33.4672	33.4035	33.3642	33.3622	3.44008	33.1211	33.1432	33.0592	2.99983	-0.380441	0.0165207	-0.688253	0.00118101	-0.937362	0.000191192	-1.22879	0.00027382	457754	339169	428559	22924.6	306116	289402	305491	289831	253814	226315	247743
RPS4B;RPS4A	RPS4B;RPS4A	40S ribosomal protein S4-B;40S ribosomal protein S4-A	P0CX36	No	No	92	35.4919	35.611	35.6249	35.462	5.70909	34.8954	34.7727	34.8919	34.9103	4.32408	34.3961	34.4636	34.4154	34.4249	1.97666	34.053	34.1677	34.1686	34.0559	4.54721	33.7661	33.9988	34.0177	9.42975	-0.679863	1.25339e-05	-1.12247	2.27563e-07	-1.43614	1.61805e-07	-1.61992	6.69242e-06	734551	797776	805529	48726.4	485814	446212	484643	490846	343674	360138	348311
RPS30B;RPS30A	RPS30B;RPS30A	40S ribosomal protein S30-B;40S ribosomal protein S30-A	P0CX34	No	No	71.4	32.5533	31.4446	31.8331	31.8184	34.5982	32.5054	31.5353	32.1808	31.8899	28.2577	31.5312	31.9828	31.7248	31.7412	12.9755	31.4713	31.4175	31.4322	30.9026	16.9609	31.5122	31.4214	31.2923	7.60408	0.115517	0.722755	-0.167358	0.527451	-0.606441	0.0644443	-0.503727	0.131283	395855	183557	240292	16107.7	382929	195478	305776	249933	194913	266564	222906
RPS3	YNL178W	40S ribosomal protein S3	P05750	No	No	97.5	36.0451	35.5774	35.7128	35.6951	14.6008	35.1079	34.7088	34.8677	34.9406	11.4963	34.4476	34.6044	34.5729	34.6189	5.28057	34.3887	34.2999	34.2947	34.2164	4.89509	34.2445	34.0456	34.2409	7.70067	-0.851312	0.000611105	-1.19662	3.17242e-05	-1.45763	9.41605e-06	-1.58055	6.8876e-05	1.1961e+06	864918	950028	63553.4	624670	473698	528881	556278	395269	440633	431118
RPS28B	YLR264W	40S ribosomal protein S28-B	P0C0X0	No	No	16.4														27.2498
RPS28A	YOR167C	40S ribosomal protein S28-A	Q3E7X9	No	No	20.9	33.7516	34.1292	33.9262	33.9824	10.7369	33.1086	32.578	33.1549	33.063	16.9236	31.9756	32.1585	32.1852	32.4202	12.8074	31.7186	32.089	32.0639	31.6787	15.0847	32.1261	32.1654	32.2674	5.10225	-0.971265	0.000769044	-1.76249	6.27201e-06	-2.05982	4.88629e-06	-1.76107	1.02097e-05	851762	1.10659e+06	961302	67690.2	545421	377595	563206	528460	248697	282319	287596
RPS25A;RPS25B	RPS25A;RPS25B	40S ribosomal protein S25-A;40S ribosomal protein S25-B	Q3E792	No	No	67.6	34.4958	34.0713	34.48	34.0714	16.5634	33.5813	33.5073	33.5583	33.4926	2.90102	32.9703	32.8983	33.1273	33.1994	9.5916	32.957	32.8302	32.758	32.5605	11.2895	32.7722	32.317	32.4901	16.1633	-0.744747	0.00088435	-1.2308	0.00011456	-1.50322	4.92015e-05	-1.75321	0.000196465	899647	670325	889880	45401.2	477286	453444	469748	448839	312509	297301	348432
RPS24B;RPS24A	RPS24B;RPS24A	40S ribosomal protein S24-B;40S ribosomal protein S24-A	P0CX32	No	No	83.7	34.3671	34.4372	34.7952	34.3575	15.2621	33.8227	33.8504	33.7785	33.7827	2.38207	33.3221	33.337	33.2684	33.3176	2.04782	32.9955	33.1274	33.0461	32.962	5.03609	32.9365	32.9825	32.9397	1.78847	-0.680663	0.000638134	-1.178	2.92833e-05	-1.4565	1.12234e-05	-1.53636	5.86127e-05	646272	678443	869542	43476.8	443127	451731	429769	431023	313220	316457	301757
RPS23B;RPS23A	RPS23B;RPS23A	40S ribosomal protein S23-B;40S ribosomal protein S23-A	P0CX30	No	No	80.7	33.8691	33.4728	33.528	33.5706	12.908	33.2217	32.8795	33.1286	33.1365	9.83254	32.6066	32.8834	32.7573	32.5555	10.4317	32.0561	32.216	32.1343	32.0923	4.81057	32.1702	32.0505	31.9978	6.1891	-0.518543	0.00411851	-0.909418	0.000224823	-1.48545	4.34853e-06	-1.53727	3.88381e-05	437393	332324	345287	24084.1	279246	220269	261792	263225	182311	220871	202380
RPS22B;RPS22A	RPS22B;RPS22A	40S ribosomal protein S22-B;40S ribosomal protein S22-A	Q3E7Y3	No	No	94.6	34.3006	34.1391	34.2187	34.1153	5.88027	33.2299	33.4011	33.3648	33.2803	5.39391	32.79	32.637	32.6732	32.8609	7.20872	32.4695	32.7157	32.584	32.5568	7.14002	32.1318	32.4797	32.3552	11.996	-0.874416	5.01864e-06	-1.45315	6.09961e-07	-1.61194	3.10977e-07	-1.8712	7.49224e-06	646828	578324	611124	38523.8	307946	346738	338118	318890	227013	204167	209363
RPS21B	YJL136C	40S ribosomal protein S21-B	Q3E754	No	No	18.4	33.5742	33.7567	33.7008	33.4699	8.84019	32.9821	32.5552	32.7633	32.9465	13.1676	31.9056	32.0467	32.1981	32.0277	8.37617	31.912	31.9184	31.8192	31.8697	3.15055	32.2112	32.1615	32.2657	3.61508	-0.813616	0.000444637	-1.58088	1.91302e-06	-1.74558	2.37117e-07	-1.41261	1.08387e-05	585867	664890	639602	36909.1	388645	289113	333956	379190	184285	203223	225712
RPS21A	YKR057W	40S ribosomal protein S21-A	P0C0V8	No	No	18.4																					27.46	28.4599		47.1387
RPS20	YHL015W	40S ribosomal protein S20	P38701	No	No	90.9	35.2826	34.9821	35.201	34.9849	10.6352	34.5774	33.9497	34.2539	34.1406	18.7731	33.9066	34.2502	34.0051	33.9087	11.6836	33.8065	33.6375	33.641	33.429	10.595	33.5673	33.3868	33.5863	7.46403	-0.882229	0.00115403	-1.09499	6.33755e-05	-1.48411	9.58792e-06	-1.59918	2.20238e-05	1.34366e+06	1.091e+06	1.26975e+06	74027	824136	533381	658601	608867	517693	656897	554278
RPS2	YGL123W	40S ribosomal protein S2	P25443	No	No	71.7	34.3779	34.3841	34.4765	34.3812	3.36609	34.1351	33.9224	34.0642	34.0847	6.18277	33.634	33.5639	33.5745	33.5894	2.1531	33.2864	33.3418	33.3612	33.2668	3.09694	33.012	33.0124	32.9304	3.24159	-0.353339	0.000470345	-0.814508	1.19893e-07	-1.09091	4.83772e-08	-1.42001	2.06414e-07	363633	365197	389352	24682.4	307309	265171	292568	296754	217121	206827	208358
RPS1B	YML063W	40S ribosomal protein S1-B	P23248	No	No	36.1	35.2712	35.4384	35.2999	35.3306	5.15021	34.7953	34.747	34.8046	34.7619	1.88834	34.2221	34.2847	34.2321	34.0517	6.81551	33.8054	33.9152	33.8381	33.8576	3.21326	33.7131	33.6819	33.5509	5.87609	-0.557853	7.29043e-06	-1.1374	1.7494e-06	-1.48099	4.09574e-08	-1.68643	1.0652e-06	643454	722516	656396	45409.1	462658	447404	465653	452060	310958	324753	313115
RPS1A	YLR441C	40S ribosomal protein S1-A	P33442	No	No	36.1	32.8209	32.2039	33.0601	32.2971	28.5767	32.1573	31.8093	31.9106	31.9372	10.4446	31.6988	31.8844	32.0505	32.0826	11.8912	31.5	31.6143	31.5588	31.4712	4.43252	31.1606	31.0347	31.2676	8.05002	-0.641891	0.0260726	-0.666454	0.0248083	-1.05941	0.00225774	-1.44121	0.00221078	118018	76950	139296	5558.98	74504.8	58536.1	62795.1	63960.1	54218.1	61662.7	69186.6
RPS19B	YNL302C	40S ribosomal protein S19-B	P07281	No	No	16																					25.0681
RPS19A	YOL121C	40S ribosomal protein S19-A	P07280	No	No	16	34.5753	34.1519	34.5666	34.1724	16.2576	33.7619	33.5416	33.7024	33.5987	6.88911	33.2632	33.3536	33.2793	33.2117	4.09155	33.0665	32.9928	32.939	32.8495	6.30914	32.8389	32.5386	32.7069	10.3526	-0.715421	0.00140131	-1.08961	0.000108275	-1.40462	3.19531e-05	-1.67176	0.000128338	718996	536164	714699	36829.7	409146	351198	392629	365383	289570	308306	292829
RPS18B;RPS18A	RPS18B;RPS18A	40S ribosomal protein S18-B;40S ribosomal protein S18-A	P0CX56	No	No	92.5	34.1541	34.2009	34.1656	34.465	10.6771	33.6682	33.753	33.5771	33.7632	5.9295	33.2303	33.0208	33.03	33.0864	6.87314	33.0385	33.0115	32.9254	33.0683	4.21229	33.0715	33.2338	33.2408	6.50589	-0.55603	0.000624457	-1.15451	1.21215e-05	-1.23548	4.56889e-06	-1.06438	0.000118037	501678	518211	505667	42144.8	358211	379913	336298	382590	264446	228701	230160
RPS17B;RPS17A	RPS17B;RPS17A	40S ribosomal protein S17-B;40S ribosomal protein S17-A	P14127	No	No	82.4	34.5894	34.1822	34.1609	33.9396	19.5971	33.8062	33.5216	33.5544	33.7029	9.27247	32.9352	32.7447	32.9856	32.8183	7.55746	32.9951	33.0753	32.9212	32.7086	10.5788	33.2815	33.0619	33.3336	9.73401	-0.571768	0.00905018	-1.34706	9.17479e-05	-1.29297	0.000170897	-0.992309	0.0023564	731341	551462	543399	31565.9	424942	348865	356900	395575	232354	203604	240615
RPS16B;RPS16A	RPS16B;RPS16A	40S ribosomal protein S16-B;40S ribosomal protein S16-A	P0CX52	No	No	93.7	35.0912	34.6966	35.0649	34.9163	12.0942	34.5437	34.0913	34.1537	34.2575	14.5024	33.7454	33.9621	33.7779	33.9101	7.20232	33.6123	33.6892	33.5031	33.3108	11.0906	33.6253	33.2289	33.4921	13.6459	-0.680689	0.00234639	-1.09333	4.42291e-05	-1.41341	2.50779e-05	-1.49347	0.000147113	1.03266e+06	785567	1.01398e+06	61947.6	706570	516357	539182	579414	406298	472147	415552
RPS15	YOL040C	40S ribosomal protein S15	Q01855	No	No	82.4	33.8896	33.6897	33.8684	33.6208	9.12342	33.7336	33.3988	33.4389	33.2988	13.5223	33.2174	33.2427	33.0647	33.3687	8.58626	33.068	32.8223	32.8562	32.5582	14.291	32.526	32.5648	32.6911	6.06102	-0.299593	0.0398222	-0.543724	0.00098538	-0.94093	0.000269775	-1.17313	4.43511e-05	444635	387107	438153	24993.5	399065	316419	325332	295241	279041	283981	251012
RPS14B	YJL191W	40S ribosomal protein S14-B	P39516	No	No	5.8		27.6144		27.9753	17.5997	27.7483	27.0036	27.333	27.2932	21.8815	27.3757	27.335	27.0801	27.2505	8.83343	27.065	26.9697	27.4332	26.7979	19.4122	26.6865	26.5777		5.3264	-0.450311	0.152337	-0.534506	0.0224591	-0.728402	0.0337725	-1.16274	0.025286		6270.61		545.382	6880.67	4106.25	5159.43	5019.35	5314.47	5166.76	4329.95
RPS14A	YCR031C	40S ribosomal protein S14-A	P06367	No	No	12.4	34.9489	35.2136	35.3182	34.9945	12.2615	34.3674	33.7368	34.0228	34.241	18.4734	33.4446	33.7679	33.5464	33.6295	9.54714	33.3334	33.2567	33.2279	32.9658	10.5981	33.5351	33.2182	33.471	11.2645	-1.02681	0.00076616	-1.52171	9.60199e-06	-1.92284	3.55378e-06	-1.71072	4.86344e-05	1.02002e+06	1.22551e+06	1.3176e+06	71300.7	681652	440297	536814	624504	359558	449893	385855
RPS13	YDR064W	40S ribosomal protein S13	P05756	No	No	90.7	34.027	33.435	34.1026	33.8823	19.0784	33.126	32.8658	32.8598	32.8556	9.62298	32.4869	32.4774	32.7131	32.8422	12.5093	32.4599	32.3402	32.5673	32.2389	9.89279	32.5289	32.2352	32.3807	10.1694	-0.934943	0.00123951	-1.23185	0.00039898	-1.46015	0.000118028	-1.48014	0.000564704	459591	304898	484297	28153.6	246105	205494	204646	204048	158033	156988	184858
RPS12	YOR369C	40S ribosomal protein S12	P48589	No	No	58.7	33.7332	33.8845	33.918	34.0034	7.6904	33.8796	33.4457	33.6283	33.6153	12.6405	33.3085	33.3933	33.4689	33.2369	6.99142	33.018	33.0939	32.9783	32.8397	7.27317	32.7585	32.7903	32.7134	2.67292	-0.242566	0.061524	-0.532878	0.000409421	-0.902312	2.43486e-05	-1.13074	1.57664e-05	412647	458278	469057	33703.3	456717	338088	383719	380280	307426	326037	343578
RPS11B;RPS11A	RPS11B;RPS11A	40S ribosomal protein S11-B;40S ribosomal protein S11-A	P0CX48	No	No	94.9	35.0008	35.0697	35.1448	34.8991	7.19411	34.5873	34.3252	34.4818	34.4863	7.39179	34.0144	34.0959	34.3128	34.3737	11.8207	33.7694	33.9169	34.0124	33.6615	10.7314	33.4333	33.6174	33.5917	6.77886	-0.558449	0.000306563	-0.829382	0.000170028	-1.18854	1.46565e-05	-1.48113	7.63019e-06	865975	908345	956885	54655.9	650174	542186	604329	606218	437094	462510	537525
RPS10A	YOR293W	40S ribosomal protein S10-A	Q08745	No	No	31.4	33.3794	33.4789	33.5495	33.3736	5.90847	32.397	32.1489	32.4723	32.6142	13.1496	31.8982	32.0056	32.0522	31.9828	4.42866	31.6869	31.7525	31.8543	31.3997	12.9272	31.3232	31.405	31.4958	5.98867	-1.03727	6.62894e-05	-1.46068	1.54076e-07	-1.77203	2.9711e-06	-2.03738	6.26977e-07	392168	420175	441233	26451.7	198492	167126	209115	230738	140467	151325	156288
RPS0B	YLR048W	40S ribosomal protein S0-B	P46654	No	No	21.4	35.0201	34.3465	34.5713	34.4533	21.957	33.8765	33.6394	33.7232	33.7533	6.87343	33.2039	33.412	33.3877	33.2476	7.08833	33.0931	33.0794	33.0003	32.9367	5.01893	33.1831	33.0729	33.3164	8.47616	-0.849678	0.00159218	-1.28501	0.00017727	-1.57039	4.89727e-05	-1.407	0.000621575	557085	349255	408160	25470.5	252152	213937	226745	231526	158195	182742	179688
RPS0A	YGR214W	40S ribosomal protein S0-A	P32905	No	No	18.3	26.2018	26.4584	26.2005		10.5817	26.1547						26.6555													-0.132167		0.368668						1231.36	1471.07	1230.26		1191.84					1686.49
RPP2B	YDR382W	60S acidic ribosomal protein P2-beta	P02400	No	No	88.2	32.8905	33.6521	32.9356	33.5329	27.0779	32.8722	32.5788	32.7808	32.8242	8.63533	32.1469	32.1459	32.2821	32.3439	6.92408	32.0078	32.0885	32.0123	32.2058	6.53091	31.4684	31.5935	31.6189	5.50506	-0.488753	0.0571727	-1.02306	0.00241675	-1.17416	0.00117394	-1.6925	0.000841426	322146	546183	332391	34054.2	318100	259557	298574	307690	192404	192279	211312
RPP2A	YOL039W	60S acidic ribosomal protein P2-alpha	P05319	No	No	83	32.8673	32.545	32.2636	32.6893	17.2308	32.1553	31.9668	31.9053	32.0166	7.50349	31.1967	31.292	31.3642	31.3251	4.89815	31.4126	31.2841	31.2529	31.2919	4.96208	31.4029	31.4483	31.4312	1.58318	-0.580279	0.00569913	-1.29679	6.54957e-05	-1.28089	6.96934e-05	-1.16383	0.000593284	325984	260717	214514	19513.6	199004	174631	167346	180760	102396	109389	115006
RPP1B	YDL130W	60S acidic ribosomal protein P1-beta	P10622	No	No	54.7	30.1415		30.3208	30.3483	7.61212	30.3598			30.113	12.0696		29.9241	29.9351	29.901	1.20509		29.9272				30.8644		27.9815	107.653	-0.0337831	0.803517	-0.350139	0.00593487	-0.342985		-0.84723	0.489132	49642.6		56210.5	3879.95	57753			48670.2		42697.5	43024.5
RPP1A	YDL081C	60S acidic ribosomal protein P1-alpha	P05318	No	No	81.1	29.2899	30.3498	30.1935		34.7849	29.9598	29.8032			7.66415		30.158	30.5642	30.4013	13.9411	30.5552	30.2854	30.3698		9.7103	30.3292	29.8234	30.7494	31.271	-0.0629371	0.89303	0.430071	0.287466	0.459038	0.248127	0.356248	0.449259	26902.3	56087.6	50328.8		42799.4	38398.9				49103.3	65072.1
RPP1	YHR062C	Ribonuclease P/MRP protein subunit RPP1	P38786	No	No	23.5	25.5107																																663.287
RPP0	YLR340W	60S acidic ribosomal protein P0	P05317	No	No	51	34.3729	34.3492	34.6747	34.361	11.4651	33.7633	33.8323	33.7595	33.8088	2.46721	33.2796	33.397	33.2471	33.3702	4.95136	32.8736	33.0539	32.9547	33.007	5.31363	32.9565	33.1211	32.9278	7.36239	-0.648484	0.000196499	-1.11596	1.31834e-05	-1.46715	2.88356e-06	-1.43764	3.85906e-05	295000	290199	363648	19813.8	193334	202815	192830	199526	138264	149986	135188
RPO26	YPR187W	DNA-directed RNA polymerases I, II, and III subunit RPABC2	P20435	No	No	45.2	29.3899	29.8111	28.4024	29.5599	35.6851	28.9174	29.2853	29.0724	29.0468	10.7848	29.4592	29.6232	29.4787	29.5736	5.41361	29.5304	29.4369	29.2279	29.3349	9.00519	29.3018	29.0982	29.0368	9.81106	-0.210351	0.532625	0.24285	0.464522	0.0917319	0.780921	-0.145214	0.711726	17560.5	23515	8856.76	1337.99	12656.2	16332.8	14092.1	13843.7	18425	20643	18675.3
[truncated: 1,962 more rows]
[truncated: 13 more columns]

## Sheet: Sheet1
Protein IDs
P46367
Q07551
P49626
P25443
P19097
Q01662
Q08745
P0CX38	P0CX37
P23248
P38720
P37012
P40531
P07149
P22943
P00330	P00331
P07991
P05749
Q01080
P39015
Q04178
P38708
Q06485
P00830
P32324
Q05022
P05755
Q04458
Q02326
P10964
P15992
P05739
Q05580
P05738
[truncated: 3,198 more rows]
