# Supplementary material for: The cellular economy of the Saccharomyces cerevisiae zinc proteome
Source: Royal Society of Chemistry journal article supplement (doi:10.1039/c8mt00269j), 2018-01-01
Supplement: c8mt00269j5.xlsx [file c8mt00269j5.xlsx]

## Sheet: Cluster 1
Annotation Cluster 1	Enrichment Score: 39.06123917917338
Category	Term	Count	%	PValue	Genes/Uniprot	Gene Names	List Total	Pop Hits	Pop Total	Fold Enrichment	Bonferroni	Benjamini	FDR
GOTERM_BP_DIRECT	GO:0002181~cytoplasmic translation	69	37.9121	1.29443e-60	P10664, P11484, P36105, P05740, P0C2H9, P04449, P14127, P14126, P23248, P0CX52, P0CX54, Q3E792, P53295, P38701, P0CX56, P40150, P05739, P06367, P05738, P05737, P46654, P07280, P0CX48, P24000, P0CX42, P48164, P0CX85, P0CX83, P33442, P25567, P05317, P05319, P14120, P0C2H6, P17076, P02406, P0CX32, P26321, P49626, P02400, Q08745, P0CX36, P40693, P0CX38, P26786, P26785, P05756, P38061, Q3E7Y3, P41805,…	RPL4A, SSB1, RPL14A, RPL17A, RPL31B, RPL24A, RPS17B, RPL3, RPS1B, RPS16B, RPL12B, RPS25A;RPS25B, RBG2, RPS20, RPS18B, SSB2, RPL6B, RPS14A, RPL9A, RPL7A, RPS0B, RPS19A, RPS11B, RPL24B, RPL23B, RPS7B, RPL35B, RPL19B, RPS1A, SRO9, RPP0, RPP2A, RPL30, RPL27A, RPL8A, RPL28, RPS24B;RPS24A, RPL5, RPL4B, RPP2B, RPS10A, RPS4B;RPS4A, RLP7, RPS6B;RPS6A, RPS7A, RPL16B, RPS13, RPL32, RPS22B;RPS22A, RPL10, RPL…	180	171	5557	12.4572	3.61145e-58	3.61145e-58	1.71059e-57
UP_KEYWORDS	Ribonucleoprotein	78	42.8571	9.06516e-54	P10664, P36105, P40055, P05740, P0C2H9, P04449, P14127, P14126, P23248, P0CX52, P0CX54, Q3E792, P38701, P28007, P0CX56, Q12136, Q02931, P05739, P06367, P05738, P05737, P46654, P07280, P0CX48, P24000, P0CX42, P48164, P0CX85, Q04305, P15646, P0CX83, P33442, P05317, P47083, P05319, P14120, P0C2H6, P17076, Q05022, P39990, P02406, P0CX32, P26321, P40362, P0CX30, P02400, P49626, Q08745, P0CX36, P0CX38,…	RPL4A, RPL14A, UTP7, RPL17A, RPL31B, RPL24A, RPS17B, RPL3, RPS1B, RPS16B, RPL12B, RPS25A;RPS25B, RPS20, GAR1, RPS18B, SAS10, NAN1, RPL6B, RPS14A, RPL9A, RPL7A, RPS0B, RPS19A, RPS11B, RPL24B, RPL23B, RPS7B, RPL35B, UTP15, NOP1, RPL19B, RPS1A, RPP0, MPP10, RPP2A, RPL30, RPL27A, RPL8A, RRP5, SNU13, RPL28, RPS24B;RPS24A, RPL5, UTP18, RPS23B;RPS23A, RPP2B, RPL4B, RPS10A, RPS4B;RPS4A, RPS6B;RPS6A, RPS7…	182	304	5914	8.33741	1.12408e-51	1.12408e-51	1.04679e-50
GOTERM_CC_DIRECT	GO:0030529~intracellular ribonucleoprotein complex	78	42.8571	4.04399e-53	P10664, P36105, P40055, P05740, P0C2H9, P04449, P14127, P14126, P23248, P0CX52, P0CX54, Q3E792, P38701, P28007, P0CX56, Q12136, Q02931, P05739, P06367, P05738, P05737, P46654, P07280, P0CX48, P24000, P0CX42, P48164, P0CX85, Q04305, P15646, P0CX83, P33442, P05317, P47083, P05319, P14120, P0C2H6, P17076, Q05022, P39990, P02406, P0CX32, P26321, P40362, P0CX30, P02400, P49626, Q08745, P0CX36, P0CX38,…	RPL4A, RPL14A, UTP7, RPL17A, RPL31B, RPL24A, RPS17B, RPL3, RPS1B, RPS16B, RPL12B, RPS25A;RPS25B, RPS20, GAR1, RPS18B, SAS10, NAN1, RPL6B, RPS14A, RPL9A, RPL7A, RPS0B, RPS19A, RPS11B, RPL24B, RPL23B, RPS7B, RPL35B, UTP15, NOP1, RPL19B, RPS1A, RPP0, MPP10, RPP2A, RPL30, RPL27A, RPL8A, RRP5, SNU13, RPL28, RPS24B;RPS24A, RPL5, UTP18, RPS23B;RPS23A, RPP2B, RPL4B, RPS10A, RPS4B;RPS4A, RPS6B;RPS6A, RPS7…	181	309	5861	8.1739	3.76091e-51	3.76091e-51	4.42715e-50
UP_KEYWORDS	Ribosomal protein	65	35.7143	1.37551e-48	P10664, P36105, P05740, P0C2H9, P04449, P14127, P14126, P23248, P0CX52, P0CX54, Q3E792, P38701, P0CX56, P05739, P06367, P05738, P05737, P46654, P07280, P0CX48, P24000, P0CX42, P48164, P0CX85, P33442, P0CX83, P05317, P05319, P14120, P0C2H6, P17076, P0CX32, P02406, P26321, P0CX30, P49626, P02400, Q08745, P0CX36, P0CX38, P26786, P26785, P05755, P05756, P38061, Q3E7Y3, P41805, P41056, P0CX24, Q3E757,…	RPL4A, RPL14A, RPL17A, RPL31B, RPL24A, RPS17B, RPL3, RPS1B, RPS16B, RPL12B, RPS25A;RPS25B, RPS20, RPS18B, RPL6B, RPS14A, RPL9A, RPL7A, RPS0B, RPS19A, RPS11B, RPL24B, RPL23B, RPS7B, RPL35B, RPS1A, RPL19B, RPP0, RPP2A, RPL30, RPL27A, RPL8A, RPS24B;RPS24A, RPL28, RPL5, RPS23B;RPS23A, RPL4B, RPP2B, RPS10A, RPS4B;RPS4A, RPS6B;RPS6A, RPS7A, RPL16B, RPS9B, RPS13, RPL32, RPS22B;RPS22A, RPL10, RPL33B, RPL…	182	216	5914	9.77844	1.70563e-46	8.52814e-47	1.58836e-45
KEGG_PATHWAY	sce03010:Ribosome	67	36.8132	2.55916e-44	P10664, P36105, P05740, P0C2H9, P04449, P14127, P14126, P23248, P0CX52, P0CX54, Q3E792, P38701, P0CX56, P05739, P06367, P05738, P05737, P46654, P07280, P0CX48, P24000, P0CX42, P48164, P0CX85, P0CX83, P33442, P05317, P05319, P14120, P0C2H6, P17076, Q07915, P02406, P0CX32, P26321, P0CX30, P49626, P02400, Q08745, P0CX36, P40693, P0CX38, P26786, P26785, P05755, P05756, P38061, Q3E7Y3, P41805, P41056,…	RPL4A, RPL14A, RPL17A, RPL31B, RPL24A, RPS17B, RPL3, RPS1B, RPS16B, RPL12B, RPS25A;RPS25B, RPS20, RPS18B, RPL6B, RPS14A, RPL9A, RPL7A, RPS0B, RPS19A, RPS11B, RPL24B, RPL23B, RPS7B, RPL35B, RPL19B, RPS1A, RPP0, RPP2A, RPL30, RPL27A, RPL8A, RLP24, RPL28, RPS24B;RPS24A, RPL5, RPS23B;RPS23A, RPL4B, RPP2B, RPS10A, RPS4B;RPS4A, RLP7, RPS6B;RPS6A, RPS7A, RPL16B, RPS9B, RPS13, RPL32, RPS22B;RPS22A, RPL10…	121	181	2194	6.71193	1.35636e-42	1.35636e-42	2.49685e-41
GOTERM_CC_DIRECT	GO:0005840~ribosome	68	37.3626	4.66018e-42	P10664, P36105, P05740, P0C2H9, P04449, P14127, P14126, P23248, P0CX52, P0CX54, Q3E792, P38701, P0CX56, P05739, P06367, P05738, P05737, P46654, P07280, P0CX48, P24000, P0CX42, P48164, P0CX85, P15646, P0CX83, P33442, P05317, P05319, P14120, P0C2H6, P17076, P02406, P0CX32, P26321, P0CX30, Q12754, Q08687, P49626, P02400, Q08745, P0CX36, P0CX38, P26786, P26785, P05755, P05756, P38061, Q3E7Y3, P41805,…	RPL4A, RPL14A, RPL17A, RPL31B, RPL24A, RPS17B, RPL3, RPS1B, RPS16B, RPL12B, RPS25A;RPS25B, RPS20, RPS18B, RPL6B, RPS14A, RPL9A, RPL7A, RPS0B, RPS19A, RPS11B, RPL24B, RPL23B, RPS7B, RPL35B, NOP1, RPL19B, RPS1A, RPP0, RPP2A, RPL30, RPL27A, RPL8A, RPL28, RPS24B;RPS24A, RPL5, RPS23B;RPS23A, RRP12, TMA16, RPL4B, RPP2B, RPS10A, RPS4B;RPS4A, RPS6B;RPS6A, RPS7A, RPL16B, RPS9B, RPS13, RPL32, RPS22B;RPS22A…	181	301	5861	7.31536	4.33397e-40	2.16699e-40	5.10173e-39
GOTERM_MF_DIRECT	GO:0003735~structural constituent of ribosome	67	36.8132	2.73041e-40	P10664, P36105, P05740, P0C2H9, P04449, P14127, P14126, P23248, P0CX52, P0CX54, Q3E792, P38701, P0CX56, P05739, P06367, P05738, P05737, P46654, P07280, P0CX48, P24000, P0CX42, P48164, P0CX85, P0CX83, P33442, P05317, P05319, P14120, P0C2H6, P17076, Q07915, P02406, P0CX32, P26321, P0CX30, P49626, P02400, Q08745, P0CX36, P40693, P0CX38, P26786, P26785, P05755, P05756, P38061, Q3E7Y3, P41805, P41056,…	RPL4A, RPL14A, RPL17A, RPL31B, RPL24A, RPS17B, RPL3, RPS1B, RPS16B, RPL12B, RPS25A;RPS25B, RPS20, RPS18B, RPL6B, RPS14A, RPL9A, RPL7A, RPS0B, RPS19A, RPS11B, RPL24B, RPL23B, RPS7B, RPL35B, RPL19B, RPS1A, RPP0, RPP2A, RPL30, RPL27A, RPL8A, RLP24, RPL28, RPS24B;RPS24A, RPL5, RPS23B;RPS23A, RPL4B, RPP2B, RPS10A, RPS4B;RPS4A, RLP7, RPS6B;RPS6A, RPS7A, RPL16B, RPS9B, RPS13, RPL32, RPS22B;RPS22A, RPL10…	175	271	4885	6.90132	5.24239e-38	5.24239e-38	3.3994e-37
GOTERM_CC_DIRECT	GO:0022625~cytosolic large ribosomal subunit	45	24.7253	8.95403e-40	P39990, P10664, P36105, P02406, P26321, P05740, P38861, P0C2H9, P04449, P14126, P49626, P02400, P0CX54, P40693, P26785, P38061, P41805, P05739, P41056, P05738, P05737, P0CX24, Q3E757, P29453, P24000, P32495, P0CX42, P0CX85, P0CX28, P40212, P26784, P0CX26, P0CX83, P05744, P49167, P05317, Q02326, P05319, Q02753, P14120, P05749, P0C2H6, P53221, P17076, Q07915	SNU13, RPL4A, RPL14A, RPL28, RPL5, RPL17A, NMD3, RPL31B, RPL24A, RPL3, RPL4B, RPP2B, RPL12B, RLP7, RPL16B, RPL32, RPL10, RPL6B, RPL33B, RPL9A, RPL7A, RPL20B, RPL11B, RPL8B, RPL24B, NHP2, RPL23B, RPL35B, RPL42B, RPL13B, RPL16A, RPL43B, RPL19B, RPL33A, RPL38, RPP0, RPL6A, RPP2A, RPL21A, RPL30, RPL22A, RPL27A, RPL26B, RPL8A, RLP24	181	108	5861	13.4922	8.32725e-38	2.77575e-38	9.80241e-37
GOTERM_BP_DIRECT	GO:0006412~translation	68	37.3626	3.6867e-39	P10664, P11484, P36105, P05740, P0C2H9, P04449, P14127, P14126, P23248, P0CX52, P0CX54, P38701, P0CX56, P40150, P05739, P53978, P06367, P05738, P46654, P07280, P0CX48, P24000, P0CX42, P48164, P0CX85, P0CX83, P33442, P14120, P0C2H6, P17076, Q07915, P39990, P02406, P0CX32, P26321, P00958, P0CX30, Q03195, P49626, P0CX36, P0CX38, P26786, P26785, P05755, P05756, P38061, Q3E7Y3, P41805, P41056, P0CX24,…	RPL4A, SSB1, RPL14A, RPL17A, RPL31B, RPL24A, RPS17B, RPL3, RPS1B, RPS16B, RPL12B, RPS20, RPS18B, SSB2, RPL6B, HEF3, RPS14A, RPL9A, RPS0B, RPS19A, RPS11B, RPL24B, RPL23B, RPS7B, RPL35B, RPL19B, RPS1A, RPL30, RPL27A, RPL8A, RLP24, SNU13, RPL28, RPS24B;RPS24A, RPL5, MES1, RPS23B;RPS23A, RLI1, RPL4B, RPS4B;RPS4A, RPS6B;RPS6A, RPS7A, RPL16B, RPS9B, RPS13, RPL32, RPS22B;RPS22A, RPL10, RPL33B, RPL20B, R…	180	318	5557	6.60161	1.02859e-36	5.14294e-37	4.87199e-36
GOTERM_CC_DIRECT	GO:0005622~intracellular	47	25.8242	1.39689e-28	P0CX32, P36105, P02406, P26321, P05740, P0C2H9, P0CX30, P14127, P14126, P23248, P02400, P38701, P0CX36, P0CX56, P0CX38, P26786, P05755, P05756, P38061, P41805, P05739, P41056, P05738, P46654, P07280, Q3E757, P0CX48, Q3E754, P38711, P48164, P0CX85, P0CX28, P40212, P33442, P0CX26, P0CX83, Q3E7X9, P05744, P49167, P05317, Q02326, P05319, Q02753, P14120, P05749, P0C2H6, P53221	RPS24B;RPS24A, RPL14A, RPL28, RPL5, RPL17A, RPL31B, RPS23B;RPS23A, RPS17B, RPL3, RPS1B, RPP2B, RPS20, RPS4B;RPS4A, RPS18B, RPS6B;RPS6A, RPS7A, RPS9B, RPS13, RPL32, RPL10, RPL6B, RPL33B, RPL9A, RPS0B, RPS19A, RPL11B, RPS11B, RPS21B, RPS27B;RPS27A, RPS7B, RPL35B, RPL42B, RPL13B, RPS1A, RPL43B, RPL19B, RPS28A, RPL33A, RPL38, RPP0, RPL6A, RPP2A, RPL21A, RPL30, RPL22A, RPL27A, RPL26B	181	203	5861	7.49713	1.29911e-26	3.24777e-27	1.52925e-25
UP_KEYWORDS	Cytoplasm	102	56.044	5.94279e-17	Q99216, P36105, P05740, P39714, P14127, P14126, P23248, Q04178, P05739, P06367, P39015, P05738, P38879, P05737, P46654, Q02642, P48164, P25567, P14120, P38697, P17076, Q07915, Q07953, P0CX32, P38861, P0CX30, P0CX36, Q05584, P0CX38, P26786, P26785, Q3E7Y3, Q12518, P41805, Q07807, P08536, P00330, P0CX24, Q3E757, P29453, Q3E754, P39676, P0CX28, P40212, P26784, P39729, Q3E7X9, P0CX26, Q02326, Q02753,…	PNO1, RPL14A, RPL17A, BDH1, RPS17B, RPL3, RPS1B, HPT1, RPL6B, RPS14A, STM1, RPL9A, EGD2, RPL7A, RPS0B, EGD1, RPS7B, SRO9, RPL30, IMD2, RPL8A, RLP24, SDO1, RPS24B;RPS24A, NMD3, RPS23B;RPS23A, RPS4B;RPS4A, GLO2, RPS6B;RPS6A, RPS7A, RPL16B, RPS22B;RPS22A, ENT1, RPL10, PUF3, MET3, ADH1, RPL20B, RPL11B, RPL8B, RPS21B, YHB1, RPL42B, RPL13B, RPL16A, RBG1, RPS28A, RPL43B, RPL6A, RPL21A, ASC1, AAH1, RPL4A…	182	1593	5914	2.08063	1.37668e-14	1.9984e-15	1.33227e-13
GOTERM_CC_DIRECT	GO:0005737~cytoplasm	114	62.6374	3.1613e-10	Q99216, P36105, P05740, P39714, P14127, P14126, P23248, Q04178, P05739, P06367, P39015, P05738, P38879, Q03388, P05737, P46654, Q02642, P48164, P32472, P25567, P20051, P14120, P38697, P17076, Q07915, Q07953, P0CX32, P38861, P0CX30, P0CX36, Q05584, P0CX38, P49089, P26786, P26785, Q12518, Q3E7Y3, P41805, Q07807, P08536, P00330, P0CX24, Q3E757, P38143, P29453, Q3E754, P39676, P0CX28, P40212, P26784,…	PNO1, RPL14A, RPL17A, BDH1, RPS17B, RPL3, RPS1B, HPT1, RPL6B, RPS14A, STM1, RPL9A, EGD2, VPS72, RPL7A, RPS0B, EGD1, RPS7B, FPR2, SRO9, URA4, RPL30, IMD2, RPL8A, RLP24, SDO1, RPS24B;RPS24A, NMD3, RPS23B;RPS23A, RPS4B;RPS4A, GLO2, RPS6B;RPS6A, ASN1, RPS7A, RPL16B, ENT1, RPS22B;RPS22A, RPL10, PUF3, MET3, ADH1, RPL20B, RPL11B, GPX2, RPL8B, RPS21B, YHB1, RPL42B, RPL13B, RPL16A, RBG1, RPS28A, RPL43B, R…	181	2344	5861	1.57485	2.94001e-08	2.94001e-09	3.46083e-07
Annotation Cluster 2	Enrichment Score: 20.629028355462943
Category	Term	Count	%	PValue	Genes/Uniprot	Gene Names	List Total	Pop Hits	Pop Total	Fold Enrichment	Bonferroni	Benjamini	FDR
GOTERM_BP_DIRECT	GO:0042254~ribosome biogenesis	52	28.5714	1.09533e-33	P38333, Q99216, P40055, P38805, Q03532, P53261, Q08208, Q01080, P28007, P36049, P34241, Q12136, P40010, Q02931, P47077, P06367, P46654, P07280, P48164, Q12176, P15646, Q04305, P05317, P47083, Q06218, P17076, Q07915, Q05022, P39990, Q07953, P40362, Q02892, Q03195, Q12754, P40693, P0CX38, P26786, P53335, P05755, P47006, P20447, Q12389, P37838, P29453, P53742, Q04660, P32495, P24783, P10964, Q99207,…	ENP1, PNO1, UTP7, RPF1, HAS1, NOP7, NOP12, RPA49, GAR1, EBP2, URB1, SAS10, NUG1, NAN1, NOP9, RPS14A, RPS0B, RPS19A, RPS7B, MAK21, NOP1, UTP15, RPP0, MPP10, DBP9, RPL8A, RLP24, RRP5, SNU13, SDO1, UTP18, NOG1, RLI1, RRP12, RLP7, RPS6B;RPS6A, RPS7A, PXR1, RPS9B, RPA34, DBP3, DBP10, NOP4, RPL8B, NOG2, ERB1, NHP2, DBP2, RPA190, NOP14, RPA135, RRB1	180	199	5557	8.06711	3.05597e-31	1.01866e-31	1.44749e-30
UP_KEYWORDS	Ribosome biogenesis	49	26.9231	1.34034e-33	Q99216, P38333, Q07953, P39990, P40055, P38805, P40362, Q02892, Q03532, Q03195, P53261, Q12754, Q08208, Q01080, P28007, P40693, P36049, P34241, P40010, P0CX38, Q12136, Q02931, P26786, P53335, P05755, P47077, P47006, P06367, P20447, P46654, P07280, Q12389, P37838, P53742, P32495, Q04660, P48164, Q12176, Q04305, P24783, P15646, P10964, P47083, Q99207, Q06218, P22138, Q07915, Q04225, Q05022	PNO1, ENP1, SDO1, SNU13, UTP7, RPF1, UTP18, NOG1, HAS1, RLI1, NOP7, RRP12, NOP12, RPA49, GAR1, RLP7, EBP2, URB1, NUG1, RPS6B;RPS6A, SAS10, NAN1, RPS7A, PXR1, RPS9B, NOP9, RPA34, RPS14A, DBP3, RPS0B, RPS19A, DBP10, NOP4, NOG2, NHP2, ERB1, RPS7B, MAK21, UTP15, DBP2, NOP1, RPA190, MPP10, NOP14, DBP9, RPA135, RLP24, RRB1, RRP5	182	179	5914	8.89514	1.66203e-31	5.54009e-32	1.54775e-30
GOTERM_CC_DIRECT	GO:0005730~nucleolus	52	28.5714	1.1335e-27	P38333, Q99216, P40055, P38805, Q03532, P32583, P53261, Q08208, Q01080, P28007, P36049, P34241, Q12136, P40010, Q04373, Q02931, P47077, P06367, P48164, Q12176, P15646, Q04305, P47083, P27476, Q06218, Q07915, Q05022, P39990, P40362, Q02892, P38961, Q12754, P40693, P0CX38, P26786, P53335, P05755, P05756, P47006, P20447, Q12389, P37838, P53742, Q06106, P32495, Q04660, P10964, P53883, P36160, Q99207,…	ENP1, PNO1, UTP7, RPF1, HAS1, SRP40, NOP7, NOP12, RPA49, GAR1, EBP2, URB1, SAS10, NUG1, PUF6, NAN1, NOP9, RPS14A, RPS7B, MAK21, NOP1, UTP15, MPP10, NSR1, DBP9, RLP24, RRP5, SNU13, UTP18, NOG1, RRP8, RRP12, RLP7, RPS6B;RPS6A, RPS7A, PXR1, RPS9B, RPS13, RPA34, DBP3, DBP10, NOP4, NOG2, MRD1, NHP2, ERB1, RPA190, NOP13, RPF2, NOP14, RPA135, RRB1	181	271	5861	6.21337	1.05416e-25	2.10831e-26	1.2409e-24
GOTERM_BP_DIRECT	GO:0006364~rRNA processing	45	24.7253	2.41107e-25	P38333, P39990, Q07953, P40055, P11484, P38805, P40362, Q03532, Q02892, P38961, Q03195, P53261, Q08208, P28007, P36049, P0CX38, P34241, Q12136, P26786, Q02931, P40150, P53335, P05755, P47077, P06367, P20447, P46654, Q12389, P37838, Q3E754, Q06106, P32495, Q04660, P48164, Q04305, P15646, P24783, P47083, Q99207, P14120, P27476, Q06218, Q12019, Q04225, Q05022	ENP1, SNU13, SDO1, UTP7, SSB1, RPF1, UTP18, HAS1, NOG1, RRP8, RLI1, NOP7, NOP12, GAR1, EBP2, RPS6B;RPS6A, URB1, SAS10, RPS7A, NAN1, SSB2, PXR1, RPS9B, NOP9, RPS14A, DBP3, RPS0B, DBP10, NOP4, RPS21B, MRD1, NHP2, ERB1, RPS7B, UTP15, NOP1, DBP2, MPP10, NOP14, RPL30, NSR1, DBP9, MDN1, RRB1, RRP5	180	206	5557	6.74393	6.7269e-23	1.68172e-23	3.18625e-22
UP_KEYWORDS	rRNA processing	37	20.3297	5.08758e-21	P39990, P40055, P38805, P40362, Q03532, P38961, Q03195, P53261, Q08208, P28007, P0CX38, P34241, Q12136, P26786, Q02931, P53335, P05755, P47077, P06367, P20447, P46654, Q12389, P37838, Q3E754, Q06106, P32495, Q04660, P48164, Q04305, P15646, P24783, P47083, Q99207, P27476, Q06218, Q04225, Q05022	SNU13, UTP7, RPF1, UTP18, HAS1, RRP8, RLI1, NOP7, NOP12, GAR1, RPS6B;RPS6A, URB1, SAS10, RPS7A, NAN1, PXR1, RPS9B, NOP9, RPS14A, DBP3, RPS0B, DBP10, NOP4, RPS21B, MRD1, NHP2, ERB1, RPS7B, UTP15, NOP1, DBP2, MPP10, NOP14, NSR1, DBP9, RRB1, RRP5	182	173	5914	6.94969	6.3086e-19	1.57715e-19	5.87485e-18
UP_KEYWORDS	Nucleus	77	42.3077	0.000121381	Q99216, P10664, P38333, P40055, P38805, Q03532, P53261, Q08208, Q01080, P28007, P40059, P36049, P34241, Q04373, Q12136, P40010, Q02931, Q04178, P47077, P06367, P39015, P38879, Q03388, Q12009, P48567, Q02642, P48164, Q12176, Q04305, P15646, P47083, P27476, Q03774, Q06218, Q12019, Q07915, Q05022, Q07953, P39990, P26321, P32523, P38861, P40362, Q02892, P38961, Q03195, Q12754, Q08687, P49626, P40693,…	PNO1, RPL4A, ENP1, UTP7, RPF1, HAS1, NOP7, NOP12, RPA49, GAR1, DOT6, EBP2, URB1, PUF6, SAS10, NUG1, NAN1, HPT1, NOP9, RPS14A, STM1, EGD2, VPS72, TRM8, PUS4, EGD1, RPS7B, MAK21, UTP15, NOP1, MPP10, NSR1, TRM82, DBP9, MDN1, RLP24, RRP5, SDO1, SNU13, RPL5, PRP19, NMD3, UTP18, NOG1, RRP8, RLI1, RRP12, TMA16, RPL4B, RLP7, RPS6B;RPS6A, RPS7A, PXR1, RPS9B, FUN30, RPA34, DBP3, SIR4, RPL11B, DBP10, NOP4, …	182	1723	5914	1.45216	0.0149394	0.00115719	0.140074
GOTERM_CC_DIRECT	GO:0005634~nucleus	88	48.3516	0.00159494	Q99216, P10664, P38333, P40055, P38805, Q03532, P53261, Q08208, Q01080, P28007, P40059, P36049, P34241, Q04373, P40010, Q12136, Q02931, Q04178, P47077, P06367, P39015, P38879, Q03388, Q12009, P48567, Q02642, P0CX42, P48164, Q12176, P32472, Q04305, P15646, P20051, P47083, P27476, Q03774, Q06218, Q12019, Q07915, P38840, Q05022, Q07953, P39990, P02406, P26321, P32523, P38861, P40362, Q02892, P38961,…	PNO1, RPL4A, ENP1, UTP7, RPF1, HAS1, NOP7, NOP12, RPA49, GAR1, DOT6, EBP2, URB1, PUF6, NUG1, SAS10, NAN1, HPT1, NOP9, RPS14A, STM1, EGD2, VPS72, TRM8, PUS4, EGD1, RPL23B, RPS7B, MAK21, FPR2, UTP15, NOP1, URA4, MPP10, NSR1, TRM82, DBP9, MDN1, RLP24, ARO9, RRP5, SDO1, SNU13, RPL28, RPL5, PRP19, NMD3, UTP18, NOG1, RRP8, RLI1, RRP12, TMA16, RPL4B, RLP7, RPS6B;RPS6A, RPS7A, PXR1, RPS9B, FUN30, RPA34, …	181	2195	5861	1.2982	0.137955	0.00984773	1.73228
Annotation Cluster 3	Enrichment Score: 8.681245713434759
Category	Term	Count	%	PValue	Genes/Uniprot	Gene Names	List Total	Pop Hits	Pop Total	Fold Enrichment	Bonferroni	Benjamini	FDR
GOTERM_CC_DIRECT	GO:0032040~small-subunit processome	15	8.24176	2.55823e-10	P39990, P40055, P40362, P48164, P15646, Q04305, P0CX38, Q12136, Q02931, P26786, P05755, P47083, Q99207, P06367, Q05022	SNU13, UTP7, UTP18, RPS7B, NOP1, UTP15, RPS6B;RPS6A, SAS10, NAN1, RPS7A, RPS9B, MPP10, NOP14, RPS14A, RRP5	181	52	5861	9.34074	2.37915e-08	2.6435e-09	2.80062e-07
GOTERM_CC_DIRECT	GO:0005654~nucleoplasm	23	12.6374	1.2251e-09	P39990, P40055, P38861, P40362, P32583, P53742, Q04660, P53261, P15646, Q04305, P0CX38, Q12136, P26786, Q02931, P53335, P47083, Q99207, Q03774, P06367, Q02908, Q12019, Q12009, Q05022	SNU13, UTP7, NMD3, UTP18, SRP40, NOG2, ERB1, NOP7, NOP1, UTP15, RPS6B;RPS6A, SAS10, RPS7A, NAN1, PXR1, MPP10, NOP14, TRM82, RPS14A, ELP3, MDN1, TRM8, RRP5	181	155	5861	4.80495	1.13934e-07	1.03577e-08	1.34118e-06
GOTERM_BP_DIRECT	GO:0031167~rRNA methylation	14	7.69231	2.88504e-08	P39990, P40055, P40362, P38961, P15646, Q04305, P0CX38, Q12136, Q02931, P26786, P47083, Q99207, P06367, Q05022	SNU13, UTP7, UTP18, RRP8, NOP1, UTP15, RPS6B;RPS6A, SAS10, NAN1, RPS7A, MPP10, NOP14, RPS14A, RRP5	180	59	5557	7.32561	8.04923e-06	8.04925e-07	3.81259e-05
Annotation Cluster 4	Enrichment Score: 5.961691308648441
Category	Term	Count	%	PValue	Genes/Uniprot	Gene Names	List Total	Pop Hits	Pop Total	Fold Enrichment	Bonferroni	Benjamini	FDR
GOTERM_BP_DIRECT	GO:0000447~endonucleolytic cleavage in ITS1 to separate SSU-rRNA from 5.8S rRNA and LSU-rRNA from tricistronic rRNA transcript (SSU-rRNA, 5.8S rRNA, LSU-rRNA)	13	7.14286	5.54501e-09	P38333, Q99216, P40055, P47083, Q99207, Q3E754, P47077, P40362, Q06106, P46654, P0CX56, Q12136, Q05022	ENP1, PNO1, UTP7, MPP10, NOP14, RPS21B, NOP9, UTP18, MRD1, RPS0B, RPS18B, SAS10, RRP5	180	43	5557	9.33346	1.54706e-06	1.71895e-07	7.32776e-06
GOTERM_BP_DIRECT	GO:0000472~endonucleolytic cleavage to generate mature 5'-end of SSU-rRNA from (SSU-rRNA, 5.8S rRNA, LSU-rRNA)	9	4.94505	5.37683e-06	Q99216, P40055, P47083, Q99207, P47077, P40362, Q06106, Q12136, Q05022	PNO1, UTP7, MPP10, NOP14, NOP9, UTP18, MRD1, SAS10, RRP5	180	32	5557	8.68281	0.00149902	0.000125004	0.00710528
GOTERM_BP_DIRECT	GO:0000480~endonucleolytic cleavage in 5'-ETS of tricistronic rRNA transcript (SSU-rRNA, 5.8S rRNA, LSU-rRNA)	8	4.3956	4.37016e-05	P40055, P47083, Q99207, P47077, P40362, Q06106, Q12136, Q05022	UTP7, MPP10, NOP14, NOP9, UTP18, MRD1, SAS10, RRP5	180	31	5557	7.96703	0.012119	0.00087055	0.0577365
Annotation Cluster 5	Enrichment Score: 3.817612358863453
Category	Term	Count	%	PValue	Genes/Uniprot	Gene Names	List Total	Pop Hits	Pop Total	Fold Enrichment	Bonferroni	Benjamini	FDR
INTERPRO	IPR004038:Ribosomal protein L7Ae/L30e/S12e/Gadd45	5	2.74725	2.20991e-05	P39990, P14120, P29453, P32495, P17076	SNU13, RPL30, RPL8B, NHP2, RPL8A	181	6	5053	23.2643	0.00917311	0.00917311	0.0310062
INTERPRO	IPR004037:Ribosomal protein L7Ae conserved site	4	2.1978	0.000173239	P39990, P29453, P32495, P17076	SNU13, RPL8B, NHP2, RPL8A	181	4	5053	27.9171	0.069699	0.0354789	0.242824
INTERPRO	IPR018492:Ribosomal protein L7Ae/L8/Nhp2 family	4	2.1978	0.000173239	P39990, P29453, P32495, P17076	SNU13, RPL8B, NHP2, RPL8A	181	4	5053	27.9171	0.069699	0.0354789	0.242824
GOTERM_BP_DIRECT	GO:0000470~maturation of LSU-rRNA	5	2.74725	0.000808877	P39990, P29453, P32495, P17076, P05737	SNU13, RPL8B, NHP2, RPL8A, RPL7A	180	14	5557	11.0258	0.202097	0.0124643	1.06367
Annotation Cluster 6	Enrichment Score: 1.5528856633187096
Category	Term	Count	%	PValue	Genes/Uniprot	Gene Names	List Total	Pop Hits	Pop Total	Fold Enrichment	Bonferroni	Benjamini	FDR
UP_SEQ_FEATURE	repeat:Pumilio 6	3	1.64835	0.0130617	P47077, Q07807, Q04373	NOP9, PUF3, PUF6	182	6	5872	16.1319	0.994147	0.575479	16.7047
UP_SEQ_FEATURE	repeat:Pumilio 5	3	1.64835	0.0179183	P47077, Q07807, Q04373	NOP9, PUF3, PUF6	182	7	5872	13.8273	0.999149	0.544112	22.2255
UP_SEQ_FEATURE	repeat:Pumilio 1	3	1.64835	0.0179183	P47077, Q07807, Q04373	NOP9, PUF3, PUF6	182	7	5872	13.8273	0.999149	0.544112	22.2255
UP_SEQ_FEATURE	repeat:Pumilio 2	3	1.64835	0.0179183	P47077, Q07807, Q04373	NOP9, PUF3, PUF6	182	7	5872	13.8273	0.999149	0.544112	22.2255
UP_SEQ_FEATURE	repeat:Pumilio 3	3	1.64835	0.0179183	P47077, Q07807, Q04373	NOP9, PUF3, PUF6	182	7	5872	13.8273	0.999149	0.544112	22.2255
UP_SEQ_FEATURE	repeat:Pumilio 4	3	1.64835	0.0179183	P47077, Q07807, Q04373	NOP9, PUF3, PUF6	182	7	5872	13.8273	0.999149	0.544112	22.2255
INTERPRO	IPR001313:Pumilio RNA-binding repeat	3	1.64835	0.0235509	P47077, Q07807, Q04373	NOP9, PUF3, PUF6	181	7	5053	11.9645	0.999952	0.594841	28.4256
SMART	SM00025:Pumilio	3	1.64835	0.0260491	P47077, Q07807, Q04373	NOP9, PUF3, PUF6	68	7	1776	11.1933	0.74653	0.74653	22.6198
INTERPRO	IPR016024:Armadillo-type fold	8	4.3956	0.0962581	P47077, Q07807, P53978, Q12754, P39104, Q12176, P47120, Q04373	NOP9, PUF3, HEF3, RRP12, PIK1, MAK21, LIA1, PUF6	181	110	5053	2.03034	1	0.891535	75.8347
INTERPRO	IPR011989:Armadillo-like helical	5	2.74725	0.207695	P47077, Q07807, P53978, P47120, Q04373	NOP9, PUF3, HEF3, LIA1, PUF6	181	66	5053	2.11493	1	0.9761	96.1875
Annotation Cluster 7	Enrichment Score: 1.3685664722150508
Category	Term	Count	%	PValue	Genes/Uniprot	Gene Names	List Total	Pop Hits	Pop Total	Fold Enrichment	Bonferroni	Benjamini	FDR
UP_SEQ_FEATURE	metal ion-binding site:Zinc 2	6	3.2967	0.00269522	P00330, P20051, P39714, P07246, Q05584, Q04894	ADH1, URA4, BDH1, ADH3, GLO2, ADH6	182	32	5872	6.04945	0.651895	0.651895	3.6824
UP_SEQ_FEATURE	metal ion-binding site:Zinc 1; catalytic	4	2.1978	0.0029458	P00330, P39714, P07246, Q04894	ADH1, BDH1, ADH3, ADH6	182	10	5872	12.9055	0.684472	0.438281	4.01829
INTERPRO	IPR002328:Alcohol dehydrogenase, zinc-type, conserved site	4	2.1978	0.0077119	P00330, P39714, P07246, Q04894	ADH1, BDH1, ADH3, ADH6	181	12	5053	9.30571	0.960376	0.416117	10.2944
INTERPRO	IPR013154:Alcohol dehydrogenase GroES-like	4	2.1978	0.0147448	P00330, P39714, P07246, Q04894	ADH1, BDH1, ADH3, ADH6	181	15	5053	7.44457	0.997959	0.497552	18.8157
UP_SEQ_FEATURE	nucleotide phosphate-binding region:NAD	6	3.2967	0.0154287	P00330, P50094, P07246, P38697, P40047, Q04894	ADH1, IMD4, ADH3, IMD2, ALD5, ADH6	182	48	5872	4.03297	0.997711	0.580429	19.4393
INTERPRO	IPR013149:Alcohol dehydrogenase, C-terminal	4	2.1978	0.0209171	P00330, P39714, P07246, Q04894	ADH1, BDH1, ADH3, ADH6	181	17	5053	6.56874	0.999852	0.585836	25.6683
INTERPRO	IPR002085:Alcohol dehydrogenase superfamily, zinc-type	4	2.1978	0.0368829	P00330, P39714, P07246, Q04894	ADH1, BDH1, ADH3, ADH6	181	21	5053	5.31755	1	0.729075	40.9831
UP_SEQ_FEATURE	binding site:NAD	4	2.1978	0.0402717	P00330, P07246, P36013, Q04894	ADH1, ADH3, MAE1, ADH6	182	25	5872	5.1622	1	0.737982	43.5287
INTERPRO	IPR011032:GroES-like	4	2.1978	0.0416192	P00330, P39714, P07246, Q04894	ADH1, BDH1, ADH3, ADH6	181	22	5053	5.07584	1	0.744259	44.9277
KEGG_PATHWAY	sce01220:Degradation of aromatic compounds	3	1.64835	0.0669014	P00330, P07246, Q04894	ADH1, ADH3, ADH6	121	8	2194	6.79959	0.974522	0.705748	49.114
KEGG_PATHWAY	sce00071:Fatty acid degradation	3	1.64835	0.278948	P00330, P07246, P40047	ADH1, ADH3, ALD5	121	19	2194	2.86298	1	0.854259	95.8861
INTERPRO	IPR016040:NAD(P)-binding domain	6	3.2967	0.340365	P00330, P39714, P07246, P36013, P09440, Q04894	ADH1, BDH1, ADH3, MAE1, MIS1, ADH6	181	108	5053	1.55095	1	0.995581	99.7087
KEGG_PATHWAY	sce00010:Glycolysis / Gluconeogenesis	4	2.1978	0.624486	P00330, P07246, P40047, Q04894	ADH1, ADH3, ALD5, ADH6	121	58	2194	1.2505	1	0.981559	99.9929
GOTERM_MF_DIRECT	GO:0008270~zinc ion binding	6	3.2967	0.968493	P00330, P39714, P53909, P07246, Q04894, P10964	ADH1, BDH1, AAH1, ADH3, ADH6, RPA190	175	270	4885	0.620317	1	1	100
Annotation Cluster 8	Enrichment Score: 1.2297542051898107
Category	Term	Count	%	PValue	Genes/Uniprot	Gene Names	List Total	Pop Hits	Pop Total	Fold Enrichment	Bonferroni	Benjamini	FDR
UP_SEQ_FEATURE	repeat:WD 3	9	4.94505	0.0116093	Q02931, P40055, P32523, P40362, Q03774, P38011, Q04660, Q04305, Q04225	NAN1, UTP7, PRP19, UTP18, TRM82, ASC1, ERB1, UTP15, RRB1	182	100	5872	2.90374	0.989599	0.598746	14.9844
UP_SEQ_FEATURE	repeat:WD 1	9	4.94505	0.0161094	Q02931, P40055, P32523, P40362, Q03774, P38011, Q04660, Q04305, Q04225	NAN1, UTP7, PRP19, UTP18, TRM82, ASC1, ERB1, UTP15, RRB1	182	106	5872	2.73937	0.998253	0.547858	20.2102
UP_SEQ_FEATURE	repeat:WD 2	9	4.94505	0.0161094	Q02931, P40055, P32523, P40362, Q03774, P38011, Q04660, Q04305, Q04225	NAN1, UTP7, PRP19, UTP18, TRM82, ASC1, ERB1, UTP15, RRB1	182	106	5872	2.73937	0.998253	0.547858	20.2102
UP_KEYWORDS	WD repeat	9	4.94505	0.0171838	Q02931, P40055, P32523, P40362, Q03774, P38011, Q04660, Q04305, Q04225	NAN1, UTP7, PRP19, UTP18, TRM82, ASC1, ERB1, UTP15, RRB1	182	108	5914	2.70788	0.883436	0.133495	18.1395
UP_SEQ_FEATURE	repeat:WD 4	8	4.3956	0.0253505	Q02931, P40055, P40362, Q03774, P38011, Q04660, Q04305, Q04225	NAN1, UTP7, UTP18, TRM82, ASC1, ERB1, UTP15, RRB1	182	94	5872	2.74585	0.999956	0.633583	30.0201
INTERPRO	IPR001680:WD40 repeat	8	4.3956	0.0516624	Q02931, P40055, P40362, Q03774, P38011, Q04660, Q04305, Q04225	NAN1, UTP7, UTP18, TRM82, ASC1, ERB1, UTP15, RRB1	181	95	5053	2.35092	1	0.79402	52.4958
SMART	SM00320:WD40	8	4.3956	0.0599218	Q02931, P40055, P40362, Q03774, P38011, Q04660, Q04305, Q04225	NAN1, UTP7, UTP18, TRM82, ASC1, ERB1, UTP15, RRB1	68	94	1776	2.22278	0.959772	0.799431	45.1381
INTERPRO	IPR015943:WD40/YVTN repeat-like-containing domain	9	4.94505	0.0684043	Q02931, P40055, P32523, P40362, Q03774, P38011, Q04660, Q04305, Q04225	NAN1, UTP7, PRP19, UTP18, TRM82, ASC1, ERB1, UTP15, RRB1	181	122	5053	2.05946	1	0.82414	63.0015
INTERPRO	IPR017986:WD40-repeat-containing domain	8	4.3956	0.103444	Q02931, P40055, P40362, Q03774, P38011, Q04660, Q04305, Q04225	NAN1, UTP7, UTP18, TRM82, ASC1, ERB1, UTP15, RRB1	181	112	5053	1.99408	1	0.897378	78.3956
INTERPRO	IPR019775:WD40 repeat, conserved site	5	2.74725	0.124896	P40055, P38011, Q04660, Q04305, Q04225	UTP7, ASC1, ERB1, UTP15, RRB1	181	54	5053	2.58492	1	0.910975	84.6203
UP_SEQ_FEATURE	repeat:WD 5	5	2.74725	0.245939	P40362, Q03774, P38011, Q04660, Q04305	UTP18, TRM82, ASC1, ERB1, UTP15	182	82	5872	1.9673	1	0.995989	98.0243
UP_SEQ_FEATURE	repeat:WD 6	4	2.1978	0.332762	Q03774, P38011, Q04660, Q04305	TRM82, ASC1, ERB1, UTP15	182	66	5872	1.95538	1	0.999247	99.6393
UP_SEQ_FEATURE	repeat:WD 7	3	1.64835	0.350803	Q03774, P38011, Q04660	TRM82, ASC1, ERB1	182	40	5872	2.41978	1	0.999354	99.7536
Annotation Cluster 9	Enrichment Score: 1.2283485352569152
Category	Term	Count	%	PValue	Genes/Uniprot	Gene Names	List Total	Pop Hits	Pop Total	Fold Enrichment	Bonferroni	Benjamini	FDR
UP_KEYWORDS	NAD	9	4.94505	0.00881114	P00330, P39676, P39714, P50094, P07246, Q06053, P36013, P38697, P40047	ADH1, YHB1, BDH1, IMD4, ADH3, DUS3, MAE1, IMD2, ALD5	182	96	5914	3.04636	0.66627	0.0753938	9.71483
UP_SEQ_FEATURE	nucleotide phosphate-binding region:NAD	6	3.2967	0.0154287	P00330, P50094, P07246, P38697, P40047, Q04894	ADH1, IMD4, ADH3, IMD2, ALD5, ADH6	182	48	5872	4.03297	0.997711	0.580429	19.4393
UP_KEYWORDS	Oxidoreductase	15	8.24176	0.0260795	P00330, P38143, P39676, P28272, P39714, P36013, Q06053, P47120, P40047, P21147, P09440, P50094, P07246, P38697, Q04894	ADH1, GPX2, YHB1, URA1, BDH1, MAE1, DUS3, LIA1, ALD5, OLE1, MIS1, IMD4, ADH3, IMD2, ADH6	182	258	5914	1.88922	0.96225	0.185189	26.2986
GOTERM_MF_DIRECT	GO:0016491~oxidoreductase activity	15	8.24176	0.155931	P00330, P38143, P39676, P28272, P39714, P36013, Q06053, P47120, P40047, P21147, P09440, P50094, P07246, P38697, Q04894	ADH1, GPX2, YHB1, URA1, BDH1, MAE1, DUS3, LIA1, ALD5, OLE1, MIS1, IMD4, ADH3, IMD2, ADH6	175	292	4885	1.43395	1	0.885807	87.883
GOTERM_BP_DIRECT	GO:0055114~oxidation-reduction process	15	8.24176	0.226658	P00330, P38143, P39676, P28272, P39714, P36013, Q06053, P47120, P40047, P21147, P09440, P50094, P07246, P38697, Q04894	ADH1, GPX2, YHB1, URA1, BDH1, MAE1, DUS3, LIA1, ALD5, OLE1, MIS1, IMD4, ADH3, IMD2, ADH6	180	347	5557	1.33453	1	0.908408	96.6517
INTERPRO	IPR016040:NAD(P)-binding domain	6	3.2967	0.340365	P00330, P39714, P07246, P36013, P09440, Q04894	ADH1, BDH1, ADH3, MAE1, MIS1, ADH6	181	108	5053	1.55095	1	0.995581	99.7087
Annotation Cluster 10	Enrichment Score: 1.1006187330450978
Category	Term	Count	%	PValue	Genes/Uniprot	Gene Names	List Total	Pop Hits	Pop Total	Fold Enrichment	Bonferroni	Benjamini	FDR
UP_SEQ_FEATURE	domain:RRM 2	4	2.1978	0.0288311	P37838, P27476, Q06106, P53883	NOP4, NSR1, MRD1, NOP13	182	22	5872	5.86613	0.999989	0.646502	33.4154
UP_SEQ_FEATURE	domain:RRM 1	4	2.1978	0.0288311	P37838, P27476, Q06106, P53883	NOP4, NSR1, MRD1, NOP13	182	22	5872	5.86613	0.999989	0.646502	33.4154
INTERPRO	IPR012677:Nucleotide-binding, alpha-beta plait	6	3.2967	0.0765339	P0CX32, P37838, P27476, Q06106, Q08208, P53883	RPS24B;RPS24A, NOP4, NSR1, MRD1, NOP12, NOP13	181	64	5053	2.61723	1	0.841905	67.2834
SMART	SM00360:RRM	5	2.74725	0.0979912	P37838, P27476, Q06106, Q08208, P53883	NOP4, NSR1, MRD1, NOP12, NOP13	68	47	1776	2.77847	0.995312	0.832639	63.285
INTERPRO	IPR000504:RNA recognition motif domain	5	2.74725	0.124896	P37838, P27476, Q06106, Q08208, P53883	NOP4, NSR1, MRD1, NOP12, NOP13	181	54	5053	2.58492	1	0.910975	84.6203
GOTERM_MF_DIRECT	GO:0003676~nucleic acid binding	13	7.14286	0.319872	Q12389, P37838, Q03532, Q06106, Q08208, P24783, P0CX56, P53883, P53335, P27476, P20447, Q06218, Q05022	DBP10, NOP4, HAS1, MRD1, NOP12, DBP2, RPS18B, NOP13, PXR1, NSR1, DBP3, DBP9, RRP5	175	286	4885	1.26883	1	0.97529	99.1764
Annotation Cluster 11	Enrichment Score: 1.0763961150441936
Category	Term	Count	%	PValue	Genes/Uniprot	Gene Names	List Total	Pop Hits	Pop Total	Fold Enrichment	Bonferroni	Benjamini	FDR
GOTERM_BP_DIRECT	GO:0000054~ribosomal subunit export from nucleus	4	2.1978	0.00583361	P40150, P11484, Q02892, Q03195	SSB2, SSB1, NOG1, RLI1	180	12	5557	10.2907	0.804529	0.0823257	7.44038
UP_KEYWORDS	Protein biosynthesis	6	3.2967	0.212719	P40150, P11484, P00958, P53978, Q03195, P09064	SSB2, SSB1, MES1, HEF3, RLI1, SUI3	182	104	5914	1.87468	1	0.724574	93.6822
GOTERM_MF_DIRECT	GO:0016887~ATPase activity	6	3.2967	0.475411	P40150, P11484, Q08234, P53978, Q03195, Q12019	SSB2, SSB1, YOL075C, HEF3, RLI1, MDN1	175	127	4885	1.31879	1	0.99295	99.9675
Annotation Cluster 12	Enrichment Score: 1.0598865647934232
Category	Term	Count	%	PValue	Genes/Uniprot	Gene Names	List Total	Pop Hits	Pop Total	Fold Enrichment	Bonferroni	Benjamini	FDR
INTERPRO	IPR006073:GTP binding domain	5	2.74725	0.00117769	Q02892, P53742, P53295, P39729, P40010	NOG1, NOG2, RBG2, RBG1, NUG1	181	14	5053	9.9704	0.388222	0.115601	1.63997
UP_SEQ_FEATURE	nucleotide phosphate-binding region:GTP	5	2.74725	0.287108	Q02892, P53742, P53295, P39729, P40010	NOG1, NOG2, RBG2, RBG1, NUG1	182	88	5872	1.83317	1	0.998166	99.0948
UP_KEYWORDS	GTP-binding	5	2.74725	0.338493	Q02892, P53742, P53295, P39729, P40010	NOG1, NOG2, RBG2, RBG1, NUG1	182	96	5914	1.69242	1	0.839592	99.1535
GOTERM_MF_DIRECT	GO:0005525~GTP binding	5	2.74725	0.503302	Q02892, P53742, P53295, P39729, P40010	NOG1, NOG2, RBG2, RBG1, NUG1	175	103	4885	1.35506	1	0.994302	99.9835
Annotation Cluster 13	Enrichment Score: 1.0132703924585438
Category	Term	Count	%	PValue	Genes/Uniprot	Gene Names	List Total	Pop Hits	Pop Total	Fold Enrichment	Bonferroni	Benjamini	FDR
UP_SEQ_FEATURE	short sequence motif:DEAD box	5	2.74725	0.00572289	Q12389, P20447, Q03532, Q06218, P24783	DBP10, DBP3, HAS1, DBP9, DBP2	182	24	5872	6.72161	0.893975	0.5267	7.66873
UP_SEQ_FEATURE	short sequence motif:Q motif	5	2.74725	0.00767517	Q12389, P20447, Q03532, Q06218, P24783	DBP10, DBP3, HAS1, DBP9, DBP2	182	26	5872	6.20456	0.950835	0.529115	10.1574
INTERPRO	IPR014014:RNA helicase, DEAD-box type, Q motif	5	2.74725	0.00946466	Q12389, P20447, Q03532, Q06218, P24783	DBP10, DBP3, HAS1, DBP9, DBP2	181	24	5053	5.81607	0.981043	0.432496	12.4925
GOTERM_BP_DIRECT	GO:0010501~RNA secondary structure unwinding	5	2.74725	0.0102295	Q12389, P20447, Q03532, Q06218, P24783	DBP10, DBP3, HAS1, DBP9, DBP2	180	27	5557	5.71708	0.94323	0.133625	12.7053
INTERPRO	IPR000629:RNA helicase, ATP-dependent, DEAD-box, conserved site	4	2.1978	0.0368829	Q12389, P20447, Q03532, P24783	DBP10, DBP3, HAS1, DBP2	181	21	5053	5.31755	1	0.729075	40.9831
GOTERM_MF_DIRECT	GO:0004004~ATP-dependent RNA helicase activity	5	2.74725	0.0485375	Q12389, P20447, Q03532, Q06218, P24783	DBP10, DBP3, HAS1, DBP9, DBP2	175	39	4885	3.57875	0.999929	0.580399	46.1763
GOTERM_MF_DIRECT	GO:0008186~RNA-dependent ATPase activity	3	1.64835	0.0760668	P20447, Q03532, P24783	DBP3, HAS1, DBP2	175	13	4885	6.44176	1	0.718	62.656
UP_SEQ_FEATURE	domain:Helicase C-terminal	6	3.2967	0.0880824	Q12389, P31380, P20447, Q03532, Q06218, P24783	DBP10, FUN30, DBP3, HAS1, DBP9, DBP2	182	77	5872	2.51406	1	0.894945	72.2471
UP_SEQ_FEATURE	domain:Helicase ATP-binding	6	3.2967	0.0957827	Q12389, P31380, P20447, Q03532, Q06218, P24783	DBP10, FUN30, DBP3, HAS1, DBP9, DBP2	182	79	5872	2.45041	1	0.88776	75.3333
INTERPRO	IPR011545:DNA/RNA helicase, DEAD/DEAH box type, N-terminal	5	2.74725	0.118755	Q12389, P20447, Q03532, Q06218, P24783	DBP10, DBP3, HAS1, DBP9, DBP2	181	53	5053	2.63369	1	0.918759	83.0345
INTERPRO	IPR027417:P-loop containing nucleoside triphosphate hydrolase	17	9.34066	0.124492	Q12389, Q03532, Q02892, P53742, Q03195, P53295, P09440, P24783, P39729, P40010, Q08234, P31380, P53978, P20447, P08536, Q06218, Q12019	DBP10, HAS1, NOG1, NOG2, RLI1, RBG2, MIS1, DBP2, RBG1, NUG1, YOL075C, FUN30, HEF3, DBP3, MET3, DBP9, MDN1	181	329	5053	1.44253	1	0.919543	84.5204
INTERPRO	IPR014001:Helicase, superfamily 1/2, ATP-binding domain	6	3.2967	0.138529	Q12389, P31380, P20447, Q03532, Q06218, P24783	DBP10, FUN30, DBP3, HAS1, DBP9, DBP2	181	77	5053	2.17536	1	0.925044	87.6615
INTERPRO	IPR001650:Helicase, C-terminal	6	3.2967	0.144021	Q12389, P31380, P20447, Q03532, Q06218, P24783	DBP10, FUN30, DBP3, HAS1, DBP9, DBP2	181	78	5053	2.14747	1	0.925272	88.7206
SMART	SM00490:HELICc	6	3.2967	0.161381	Q12389, P31380, P20447, Q03532, Q06218, P24783	DBP10, FUN30, DBP3, HAS1, DBP9, DBP2	68	77	1776	2.03514	0.999894	0.898529	81.9123
SMART	SM00487:DEXDc	6	3.2967	0.161381	Q12389, P31380, P20447, Q03532, Q06218, P24783	DBP10, FUN30, DBP3, HAS1, DBP9, DBP2	68	77	1776	2.03514	0.999894	0.898529	81.9123
UP_KEYWORDS	Helicase	6	3.2967	0.180513	Q12389, P31380, P20447, Q03532, Q06218, P24783	DBP10, FUN30, DBP3, HAS1, DBP9, DBP2	182	98	5914	1.98946	1	0.674394	89.9623
GOTERM_MF_DIRECT	GO:0004386~helicase activity	6	3.2967	0.283789	Q12389, P31380, P20447, Q03532, Q06218, P24783	DBP10, FUN30, DBP3, HAS1, DBP9, DBP2	175	100	4885	1.67486	1	0.965711	98.4324
GOTERM_MF_DIRECT	GO:0003676~nucleic acid binding	13	7.14286	0.319872	Q12389, P37838, Q03532, Q06106, Q08208, P24783, P0CX56, P53883, P53335, P27476, P20447, Q06218, Q05022	DBP10, NOP4, HAS1, MRD1, NOP12, DBP2, RPS18B, NOP13, PXR1, NSR1, DBP3, DBP9, RRP5	175	286	4885	1.26883	1	0.97529	99.1764
UP_SEQ_FEATURE	nucleotide phosphate-binding region:ATP	10	5.49451	0.859276	Q12389, P31380, P20447, Q03532, Q03195, P08536, Q06218, Q12019, P09440, P24783	DBP10, FUN30, DBP3, HAS1, RLI1, MET3, DBP9, MDN1, MIS1, DBP2	182	390	5872	0.827275	1	1	100
UP_KEYWORDS	Hydrolase	11	6.04396	0.996325	P20051, Q12389, P31380, P20447, Q03532, P53909, Q06218, P09440, P24783, Q04344, Q05584	URA4, DBP10, FUN30, DBP3, HAS1, AAH1, DBP9, MIS1, DBP2, HNT1, GLO2	182	644	5914	0.55503	1	0.999999	100
GOTERM_MF_DIRECT	GO:0016787~hydrolase activity	11	6.04396	0.999786	P20051, Q12389, P31380, P20447, Q03532, P53909, Q06218, P09440, P24783, Q04344, Q05584	URA4, DBP10, FUN30, DBP3, HAS1, AAH1, DBP9, MIS1, DBP2, HNT1, GLO2	175	664	4885	0.462435	1	1	100
Annotation Cluster 14	Enrichment Score: 0.9527330241216485
Category	Term	Count	%	PValue	Genes/Uniprot	Gene Names	List Total	Pop Hits	Pop Total	Fold Enrichment	Bonferroni	Benjamini	FDR
GOTERM_CC_DIRECT	GO:0005736~DNA-directed RNA polymerase I complex	4	2.1978	0.00807692	P47006, P22138, Q01080, P10964	RPA34, RPA135, RPA49, RPA190	181	14	5861	9.25178	0.529615	0.046044	8.4954
GOTERM_MF_DIRECT	GO:0001054~RNA polymerase I activity	4	2.1978	0.0121004	P47006, P22138, Q01080, P10964	RPA34, RPA135, RPA49, RPA190	175	14	4885	7.97551	0.903426	0.253367	14.0643
GOTERM_BP_DIRECT	GO:0042790~transcription of nuclear large rRNA transcript from RNA polymerase I promoter	4	2.1978	0.0160207	P47006, P22138, Q01080, P10964	RPA34, RPA135, RPA49, RPA190	180	17	5557	7.26405	0.988957	0.185203	19.219
GOTERM_BP_DIRECT	GO:0006360~transcription from RNA polymerase I promoter	4	2.1978	0.028527	P47006, P22138, Q01080, P10964	RPA34, RPA135, RPA49, RPA190	180	21	5557	5.88042	0.999689	0.29607	31.7824
UP_KEYWORDS	DNA-directed RNA polymerase	4	2.1978	0.084485	P47006, P22138, Q01080, P10964	RPA34, RPA135, RPA49, RPA190	182	34	5914	3.82288	0.999982	0.455601	63.9144
GOTERM_MF_DIRECT	GO:0003899~DNA-directed RNA polymerase activity	4	2.1978	0.119105	P47006, P22138, Q01080, P10964	RPA34, RPA135, RPA49, RPA190	175	34	4885	3.28403	1	0.846337	79.3797
KEGG_PATHWAY	sce03020:RNA polymerase	4	2.1978	0.223725	P47006, P22138, Q01080, P10964	RPA34, RPA135, RPA49, RPA190	121	30	2194	2.41763	0.999999	0.85302	91.5485
KEGG_PATHWAY	sce00230:Purine metabolism	8	4.3956	0.269151	P47006, P50094, P53909, P08536, P22138, P38697, Q01080, P10964	RPA34, IMD4, AAH1, MET3, RPA135, IMD2, RPA49, RPA190	121	96	2194	1.51102	1	0.874726	95.3071
KEGG_PATHWAY	sce00240:Pyrimidine metabolism	6	3.2967	0.358246	P20051, P47006, P28272, P22138, Q01080, P10964	URA4, RPA34, URA1, RPA135, RPA49, RPA190	121	72	2194	1.51102	1	0.904709	98.68
UP_KEYWORDS	Nucleotidyltransferase	4	2.1978	0.553458	P08536, P22138, Q01080, P10964	MET3, RPA135, RPA49, RPA190	182	94	5914	1.38274	1	0.956024	99.9909
GOTERM_MF_DIRECT	GO:0016779~nucleotidyltransferase activity	4	2.1978	0.698431	P08536, P22138, Q01080, P10964	MET3, RPA135, RPA49, RPA190	175	100	4885	1.11657	1	0.999731	100
UP_KEYWORDS	Transcription	10	5.49451	0.98494	Q02931, P47006, Q02642, P22138, P11978, Q01080, Q02908, Q04305, P40059, P10964	NAN1, RPA34, EGD1, RPA135, SIR4, RPA49, ELP3, UTP15, DOT6, RPA190	182	528	5914	0.615426	1	0.999993	100
Annotation Cluster 15	Enrichment Score: 0.7887745967564203
Category	Term	Count	%	PValue	Genes/Uniprot	Gene Names	List Total	Pop Hits	Pop Total	Fold Enrichment	Bonferroni	Benjamini	FDR
INTERPRO	IPR015928:Aconitase/3-isopropylmalate dehydratase, swivel	3	1.64835	0.0117551	P07264, P39522, P49367	LEU1, ILV3, LYS4	181	5	5053	16.7503	0.99278	0.460097	15.2896
UP_SEQ_FEATURE	metal ion-binding site:Iron-sulfur (4Fe-4S)	3	1.64835	0.0432858	P07264, P39522, P49367	LEU1, ILV3, LYS4	182	11	5872	8.7992	1	0.735767	45.9449
UP_KEYWORDS	Iron	8	4.3956	0.0642722	P07264, P39522, P46969, P39676, P49367, P47120, Q02908, P21147	LEU1, ILV3, RPE1, YHB1, LYS4, LIA1, ELP3, OLE1	182	116	5914	2.241	0.999735	0.384027	53.5644
UP_KEYWORDS	Iron-sulfur	4	2.1978	0.0965202	P07264, P39522, P49367, Q02908	LEU1, ILV3, LYS4, ELP3	182	36	5914	3.6105	0.999997	0.484404	69.0279
KEGG_PATHWAY	sce00290:Valine, leucine and isoleucine biosynthesis	3	1.64835	0.136926	P07264, P39522, P25379	LEU1, ILV3, CHA1	121	12	2194	4.53306	0.999592	0.857887	76.2288
GOTERM_MF_DIRECT	GO:0051536~iron-sulfur cluster binding	4	2.1978	0.151919	P07264, P39522, P49367, Q02908	LEU1, ILV3, LYS4, ELP3	175	38	4885	2.93835	1	0.895631	87.146
UP_KEYWORDS	Lyase	6	3.2967	0.175335	P07264, P39522, P37303, P49367, P25379, P53848	LEU1, ILV3, GLY1, LYS4, CHA1, FOL1	182	97	5914	2.00997	1	0.679638	89.205
UP_KEYWORDS	Amino-acid biosynthesis	6	3.2967	0.175335	P07264, P39522, P49367, P08536, P09440, P49089	LEU1, ILV3, LYS4, MET3, MIS1, ASN1	182	97	5914	2.00997	1	0.679638	89.205
GOTERM_BP_DIRECT	GO:0008652~cellular amino acid biosynthetic process	6	3.2967	0.202122	P07264, P39522, P49367, P08536, P09440, P49089	LEU1, ILV3, LYS4, MET3, MIS1, ASN1	180	97	5557	1.90962	1	0.88609	94.9408
GOTERM_MF_DIRECT	GO:0016829~lyase activity	6	3.2967	0.263087	P07264, P39522, P37303, P49367, P25379, P53848	LEU1, ILV3, GLY1, LYS4, CHA1, FOL1	175	97	4885	1.72666	1	0.968188	97.7648
GOTERM_MF_DIRECT	GO:0051539~4 iron, 4 sulfur cluster binding	3	1.64835	0.263162	P07264, P39522, P49367	LEU1, ILV3, LYS4	175	28	4885	2.99082	1	0.961514	97.7676
KEGG_PATHWAY	sce01210:2-Oxocarboxylic acid metabolism	3	1.64835	0.579574	P07264, P39522, P49367	LEU1, ILV3, LYS4	121	35	2194	1.55419	1	0.978225	99.9787
KEGG_PATHWAY	sce01230:Biosynthesis of amino acids	7	3.84615	0.676644	P07264, P39522, P46969, P37303, P49367, Q12189, P25379	LEU1, ILV3, RPE1, GLY1, LYS4, RKI1, CHA1	121	123	2194	1.03192	1	0.976242	99.9984
GOTERM_BP_DIRECT	GO:0008152~metabolic process	8	4.3956	0.817907	P07264, P39522, P46969, P09950, P49367, P09440, P53848, P40047	LEU1, ILV3, RPE1, HEM1, LYS4, MIS1, FOL1, ALD5	180	284	5557	0.86964	1	0.999999	100
Annotation Cluster 16	Enrichment Score: 0.5711004256916153
Category	Term	Count	%	PValue	Genes/Uniprot	Gene Names	List Total	Pop Hits	Pop Total	Fold Enrichment	Bonferroni	Benjamini	FDR
GOTERM_BP_DIRECT	GO:0006400~tRNA modification	4	2.1978	0.11524	P48567, Q03774, Q06053, Q12009	PUS4, TRM82, DUS3, TRM8	180	37	5557	3.33754	1	0.717817	80.1712
GOTERM_BP_DIRECT	GO:0008033~tRNA processing	5	2.74725	0.351689	P48567, Q03774, Q06053, P15646, Q12009	PUS4, TRM82, DUS3, NOP1, TRM8	180	93	5557	1.6598	1	0.979767	99.6744
UP_KEYWORDS	tRNA processing	4	2.1978	0.477461	P48567, Q03774, Q06053, Q12009	PUS4, TRM82, DUS3, TRM8	182	84	5914	1.54736	1	0.925445	99.9444
Annotation Cluster 17	Enrichment Score: 0.5175784462592794
Category	Term	Count	%	PValue	Genes/Uniprot	Gene Names	List Total	Pop Hits	Pop Total	Fold Enrichment	Bonferroni	Benjamini	FDR
UP_KEYWORDS	Pyridoxal phosphate	4	2.1978	0.261415	P09950, P37303, P25379, P38840	HEM1, GLY1, CHA1, ARO9	182	58	5914	2.241	1	0.791037	96.9775
INTERPRO	IPR015422:Pyridoxal phosphate-dependent transferase, major region, subdomain 2	3	1.64835	0.276577	P09950, P37303, P38840	HEM1, GLY1, ARO9	181	29	5053	2.88798	1	0.99049	98.9361
INTERPRO	IPR015421:Pyridoxal phosphate-dependent transferase, major region, subdomain 1	3	1.64835	0.342981	P09950, P37303, P38840	HEM1, GLY1, ARO9	181	34	5053	2.46328	1	0.995047	99.7245
INTERPRO	IPR015424:Pyridoxal phosphate-dependent transferase	3	1.64835	0.342981	P09950, P37303, P38840	HEM1, GLY1, ARO9	181	34	5053	2.46328	1	0.995047	99.7245
Annotation Cluster 18	Enrichment Score: 0.4930146293328053
Category	Term	Count	%	PValue	Genes/Uniprot	Gene Names	List Total	Pop Hits	Pop Total	Fold Enrichment	Bonferroni	Benjamini	FDR
UP_SEQ_FEATURE	domain:ABC transporter 1	3	1.64835	0.168043	Q08234, P53978, Q03195	YOL075C, HEF3, RLI1	182	24	5872	4.03297	1	0.977314	92.2508
UP_SEQ_FEATURE	domain:ABC transporter 2	3	1.64835	0.168043	Q08234, P53978, Q03195	YOL075C, HEF3, RLI1	182	24	5872	4.03297	1	0.977314	92.2508
INTERPRO	IPR017871:ABC transporter, conserved site	3	1.64835	0.24982	Q08234, P53978, Q03195	YOL075C, HEF3, RLI1	181	27	5053	3.1019	1	0.986169	98.2288
INTERPRO	IPR003439:ABC transporter-like	3	1.64835	0.303283	Q08234, P53978, Q03195	YOL075C, HEF3, RLI1	181	31	5053	2.70166	1	0.992258	99.3724
GOTERM_MF_DIRECT	GO:0016887~ATPase activity	6	3.2967	0.475411	P40150, P11484, Q08234, P53978, Q03195, Q12019	SSB2, SSB1, YOL075C, HEF3, RLI1, MDN1	175	127	4885	1.31879	1	0.99295	99.9675
INTERPRO	IPR003593:AAA+ ATPase domain	4	2.1978	0.572743	Q08234, P53978, Q03195, Q12019	YOL075C, HEF3, RLI1, MDN1	181	83	5053	1.3454	1	0.99996	99.9993
SMART	SM00382:AAA	4	2.1978	0.607511	Q08234, P53978, Q03195, Q12019	YOL075C, HEF3, RLI1, MDN1	68	82	1776	1.27403	1	0.99994	99.9887
Annotation Cluster 19	Enrichment Score: 0.3129438599246036
Category	Term	Count	%	PValue	Genes/Uniprot	Gene Names	List Total	Pop Hits	Pop Total	Fold Enrichment	Bonferroni	Benjamini	FDR
INTERPRO	IPR027417:P-loop containing nucleoside triphosphate hydrolase	17	9.34066	0.124492	Q12389, Q03532, Q02892, P53742, Q03195, P53295, P09440, P24783, P39729, P40010, Q08234, P31380, P53978, P20447, P08536, Q06218, Q12019	DBP10, HAS1, NOG1, NOG2, RLI1, RBG2, MIS1, DBP2, RBG1, NUG1, YOL075C, FUN30, HEF3, DBP3, MET3, DBP9, MDN1	181	329	5053	1.44253	1	0.919543	84.5204
GOTERM_MF_DIRECT	GO:0000166~nucleotide binding	33	18.1319	0.34979	P0CX32, P11484, P00958, Q03532, Q02892, Q03195, Q08208, P53295, P09440, P49089, P40010, P40150, Q04178, Q08234, P53978, P31380, P20447, P08536, Q04344, Q12389, P37838, P53742, Q06106, P53848, P39729, P24783, P53883, P27476, P50094, P39104, Q06218, P38697, Q12019	RPS24B;RPS24A, SSB1, MES1, HAS1, NOG1, RLI1, NOP12, RBG2, MIS1, ASN1, NUG1, SSB2, HPT1, YOL075C, HEF3, FUN30, DBP3, MET3, HNT1, DBP10, NOP4, NOG2, MRD1, FOL1, RBG1, DBP2, NOP13, NSR1, IMD4, PIK1, DBP9, IMD2, MDN1	175	834	4885	1.10452	1	0.980467	99.5296
UP_KEYWORDS	Nucleotide-binding	25	13.7363	0.467975	P11484, P00958, Q02892, Q03532, Q03195, P53295, P09440, P40010, P49089, P40150, Q04178, Q08234, P53978, P31380, P20447, P08536, Q04344, Q12389, P53742, P39729, P53848, P24783, Q06218, P39104, Q12019	SSB1, MES1, NOG1, HAS1, RLI1, RBG2, MIS1, NUG1, ASN1, SSB2, HPT1, YOL075C, HEF3, FUN30, DBP3, MET3, HNT1, DBP10, NOG2, RBG1, FOL1, DBP2, DBP9, PIK1, MDN1	182	760	5914	1.0689	1	0.926348	99.9316
UP_KEYWORDS	ATP-binding	18	9.89011	0.79296	P11484, Q12389, P00958, Q03532, Q03195, P09440, P24783, P53848, P49089, P40150, Q08234, P31380, P53978, P20447, P08536, Q06218, P39104, Q12019	SSB1, DBP10, MES1, HAS1, RLI1, MIS1, DBP2, FOL1, ASN1, SSB2, YOL075C, FUN30, HEF3, DBP3, MET3, DBP9, PIK1, MDN1	182	651	5914	0.898466	1	0.994897	100
UP_SEQ_FEATURE	nucleotide phosphate-binding region:ATP	10	5.49451	0.859276	Q12389, P31380, P20447, Q03532, Q03195, P08536, Q06218, Q12019, P09440, P24783	DBP10, FUN30, DBP3, HAS1, RLI1, MET3, DBP9, MDN1, MIS1, DBP2	182	390	5872	0.827275	1	1	100
GOTERM_MF_DIRECT	GO:0005524~ATP binding	18	9.89011	0.954509	P11484, Q12389, P00958, Q03532, Q03195, P09440, P24783, P53848, P49089, P40150, Q08234, P31380, P53978, P20447, P08536, Q06218, P39104, Q12019	SSB1, DBP10, MES1, HAS1, RLI1, MIS1, DBP2, FOL1, ASN1, SSB2, YOL075C, FUN30, HEF3, DBP3, MET3, DBP9, PIK1, MDN1	175	668	4885	0.752181	1	1	100
Annotation Cluster 20	Enrichment Score: 0.2655173246930043
Category	Term	Count	%	PValue	Genes/Uniprot	Gene Names	List Total	Pop Hits	Pop Total	Fold Enrichment	Bonferroni	Benjamini	FDR
UP_KEYWORDS	Metal-binding	26	14.2857	0.325825	P46969, P39522, P39714, P49367, P36013, Q05584, P07264, Q04178, P07246, Q04894, P00330, P39676, Q06053, P38711, P47120, P53848, P21147, P0CX26, P10964, P20051, P50094, P53909, P22138, P38697, Q02908, P09064	RPE1, ILV3, BDH1, LYS4, MAE1, GLO2, LEU1, HPT1, ADH3, ADH6, ADH1, YHB1, DUS3, RPS27B;RPS27A, LIA1, FOL1, OLE1, RPL43B, RPA190, URA4, IMD4, AAH1, RPA135, IMD2, ELP3, SUI3	182	739	5914	1.14324	1	0.858515	98.9462
UP_KEYWORDS	Zinc	14	7.69231	0.688	P00330, P46969, P39714, Q06053, P38711, Q05584, P0CX26, P10964, P20051, P07246, P53909, P22138, P09064, Q04894	ADH1, RPE1, BDH1, DUS3, RPS27B;RPS27A, GLO2, RPL43B, RPA190, URA4, ADH3, AAH1, RPA135, SUI3, ADH6	182	469	5914	0.969985	1	0.985706	99.9999
GOTERM_MF_DIRECT	GO:0046872~metal ion binding	26	14.2857	0.712648	P46969, P39522, P39714, P49367, P36013, Q05584, P07264, Q04178, P07246, Q04894, P00330, P39676, Q06053, P38711, P47120, P53848, P21147, P0CX26, P10964, P20051, P50094, P53909, P22138, P38697, Q02908, P09064	RPE1, ILV3, BDH1, LYS4, MAE1, GLO2, LEU1, HPT1, ADH3, ADH6, ADH1, YHB1, DUS3, RPS27B;RPS27A, LIA1, FOL1, OLE1, RPL43B, RPA190, URA4, IMD4, AAH1, RPA135, IMD2, ELP3, SUI3	175	764	4885	0.949963	1	0.99974	100
Annotation Cluster 21	Enrichment Score: 0.17293428317210263
Category	Term	Count	%	PValue	Genes/Uniprot	Gene Names	List Total	Pop Hits	Pop Total	Fold Enrichment	Bonferroni	Benjamini	FDR
UP_KEYWORDS	S-adenosyl-L-methionine	4	2.1978	0.445441	P38961, Q02908, P15646, Q12009	RRP8, ELP3, NOP1, TRM8	182	80	5914	1.62473	1	0.919618	99.8895
UP_KEYWORDS	Methyltransferase	3	1.64835	0.727801	P38961, P15646, Q12009	RRP8, NOP1, TRM8	182	83	5914	1.1745	1	0.988689	100
GOTERM_BP_DIRECT	GO:0032259~methylation	3	1.64835	0.776716	P38961, P15646, Q12009	RRP8, NOP1, TRM8	180	87	5557	1.06456	1	0.999997	100
GOTERM_MF_DIRECT	GO:0008168~methyltransferase activity	3	1.64835	0.807603	P38961, P15646, Q12009	RRP8, NOP1, TRM8	175	84	4885	0.996939	1	0.999974	100
Annotation Cluster 22	Enrichment Score: 0.11652597547027575
Category	Term	Count	%	PValue	Genes/Uniprot	Gene Names	List Total	Pop Hits	Pop Total	Fold Enrichment	Bonferroni	Benjamini	FDR
KEGG_PATHWAY	sce01130:Biosynthesis of antibiotics	12	6.59341	0.66735	P00330, P39522, P46969, P37303, P07246, P49367, Q12189, P08536, P25379, P40047, Q04894, P38840	ADH1, ILV3, RPE1, GLY1, ADH3, LYS4, RKI1, MET3, CHA1, ALD5, ADH6, ARO9	121	219	2194	0.993547	1	0.979534	99.9978
KEGG_PATHWAY	sce01230:Biosynthesis of amino acids	7	3.84615	0.676644	P07264, P39522, P46969, P37303, P49367, Q12189, P25379	LEU1, ILV3, RPE1, GLY1, LYS4, RKI1, CHA1	121	123	2194	1.03192	1	0.976242	99.9984
KEGG_PATHWAY	sce01110:Biosynthesis of secondary metabolites	15	8.24176	0.765883	P00330, P39522, P46969, P37303, P25379, P40047, P49089, P07264, P50094, P07246, Q12189, P38697, P50861, Q04894, P38840	ADH1, ILV3, RPE1, GLY1, CHA1, ALD5, ASN1, LEU1, IMD4, ADH3, RKI1, IMD2, RIB4, ADH6, ARO9	121	296	2194	0.918863	1	0.989183	99.9999
KEGG_PATHWAY	sce01100:Metabolic pathways	28	15.3846	0.988598	P46969, P39522, P37303, P28272, P49367, P25379, Q01080, P09440, P49089, P07264, P47006, P07246, P08536, Q04894, P00330, P40047, P53848, P10964, P20051, P09950, P50094, P53909, Q12189, P50861, P22138, P39104, P38697, P38840	RPE1, ILV3, GLY1, URA1, LYS4, CHA1, RPA49, MIS1, ASN1, LEU1, RPA34, ADH3, MET3, ADH6, ADH1, ALD5, FOL1, RPA190, URA4, HEM1, IMD4, AAH1, RKI1, RIB4, RPA135, PIK1, IMD2, ARO9	121	685	2194	0.741172	1	0.999993	100
Annotation Cluster 23	Enrichment Score: 0.07608673481745448
Category	Term	Count	%	PValue	Genes/Uniprot	Gene Names	List Total	Pop Hits	Pop Total	Fold Enrichment	Bonferroni	Benjamini	FDR
GOTERM_CC_DIRECT	GO:0005759~mitochondrial matrix	5	2.74725	0.557845	P09950, P39676, P07246, P36013, P40047	HEM1, YHB1, ADH3, MAE1, ALD5	181	128	5861	1.26489	1	0.96825	99.9868
GOTERM_BP_DIRECT	GO:0008152~metabolic process	8	4.3956	0.817907	P07264, P39522, P46969, P09950, P49367, P09440, P53848, P40047	LEU1, ILV3, RPE1, HEM1, LYS4, MIS1, FOL1, ALD5	180	284	5557	0.86964	1	0.999999	100
UP_SEQ_FEATURE	transit peptide:Mitochondrion	7	3.84615	0.940495	P39522, P09950, P07246, P36013, P49367, P09440, P40047	ILV3, HEM1, ADH3, MAE1, LYS4, MIS1, ALD5	182	324	5872	0.697056	1	1	100
UP_KEYWORDS	Transit peptide	7	3.84615	0.974462	P39522, P09950, P07246, P36013, P49367, P09440, P40047	ILV3, HEM1, ADH3, MAE1, LYS4, MIS1, ALD5	182	370	5914	0.614761	1	0.99998	100
UP_KEYWORDS	Mitochondrion	14	7.69231	0.995926	P48567, P39522, P48813, P49367, P36013, P25379, P35180, P09440, P40047, P53848, P09950, Q07807, P07246, P50861	PUS4, ILV3, GNP1, LYS4, MAE1, CHA1, TOM20, MIS1, ALD5, FOL1, HEM1, PUF3, ADH3, RIB4	182	768	5914	0.592348	1	0.999999	100
Annotation Cluster 24	Enrichment Score: 0.0017060431140426943
Category	Term	Count	%	PValue	Genes/Uniprot	Gene Names	List Total	Pop Hits	Pop Total	Fold Enrichment	Bonferroni	Benjamini	FDR
UP_KEYWORDS	Transcription	10	5.49451	0.98494	Q02931, P47006, Q02642, P22138, P11978, Q01080, Q02908, Q04305, P40059, P10964	NAN1, RPA34, EGD1, RPA135, SIR4, RPA49, ELP3, UTP15, DOT6, RPA190	182	528	5914	0.615426	1	0.999993	100
GOTERM_BP_DIRECT	GO:0006351~transcription, DNA-templated	9	4.94505	0.996404	Q02931, Q02642, P22138, P11978, Q01080, Q02908, Q04305, P40059, P10964	NAN1, EGD1, RPA135, SIR4, RPA49, ELP3, UTP15, DOT6, RPA190	180	527	5557	0.52723	1	1	100
GOTERM_MF_DIRECT	GO:0003677~DNA binding	8	4.3956	0.999196	P31380, P27476, P39015, P22138, P11978, Q01080, P40059, P10964	FUN30, NSR1, STM1, RPA135, SIR4, RPA49, DOT6, RPA190	175	492	4885	0.453891	1	1	100
GOTERM_BP_DIRECT	GO:0006355~regulation of transcription, DNA-templated	5	2.74725	0.999968	Q02642, P11978, Q03388, Q02908, P40059	EGD1, SIR4, VPS72, ELP3, DOT6	180	509	5557	0.303263	1	1	100
UP_KEYWORDS	Transcription regulation	4	2.1978	0.999971	Q02642, P11978, Q02908, P40059	EGD1, SIR4, ELP3, DOT6	182	477	5914	0.272491	1	1	100
Annotation Cluster 25	Enrichment Score: 0.0010701691523067503
Category	Term	Count	%	PValue	Genes/Uniprot	Gene Names	List Total	Pop Hits	Pop Total	Fold Enrichment	Bonferroni	Benjamini	FDR
UP_KEYWORDS	Protein transport	6	3.2967	0.993876	P38861, Q02642, P38879, Q02908, P35180, P40010	NMD3, EGD1, EGD2, ELP3, TOM20, NUG1	182	389	5914	0.501201	1	0.999999	100
GOTERM_BP_DIRECT	GO:0015031~protein transport	6	3.2967	0.996423	P38861, Q02642, P38879, Q02908, P35180, P40010	NMD3, EGD1, EGD2, ELP3, TOM20, NUG1	180	391	5557	0.473743	1	1	100
UP_KEYWORDS	Transport	12	6.59341	0.999895	P38861, Q08234, P25297, Q02642, P48813, Q03195, P38879, Q02908, P35180, P21147, Q04373, P40010	NMD3, YOL075C, PHO84, EGD1, GNP1, RLI1, EGD2, ELP3, TOM20, OLE1, PUF6, NUG1	182	853	5914	0.457133	1	1	100
GOTERM_BP_DIRECT	GO:0006810~transport	11	6.04396	0.999976	P38861, Q08234, P25297, Q02642, P48813, Q03195, P38879, Q02908, P35180, Q04373, P40010	NMD3, YOL075C, PHO84, EGD1, GNP1, RLI1, EGD2, ELP3, TOM20, PUF6, NUG1	180	822	5557	0.413132	1	1	100
Annotation Cluster 26	Enrichment Score: 1.3646580537356545E-4
Category	Term	Count	%	PValue	Genes/Uniprot	Gene Names	List Total	Pop Hits	Pop Total	Fold Enrichment	Bonferroni	Benjamini	FDR
GOTERM_BP_DIRECT	GO:0055085~transmembrane transport	3	1.64835	0.996968	Q08234, P25297, P48813	YOL075C, PHO84, GNP1	180	240	5557	0.385903	1	1	100
UP_KEYWORDS	Transport	12	6.59341	0.999895	P38861, Q08234, P25297, Q02642, P48813, Q03195, P38879, Q02908, P35180, P21147, Q04373, P40010	NMD3, YOL075C, PHO84, EGD1, GNP1, RLI1, EGD2, ELP3, TOM20, OLE1, PUF6, NUG1	182	853	5914	0.457133	1	1	100
UP_SEQ_FEATURE	topological domain:Cytoplasmic	5	2.74725	1	Q08234, P25297, P48813, P35180, P21147	YOL075C, PHO84, GNP1, TOM20, OLE1	182	693	5872	0.232783	1	1	100
GOTERM_CC_DIRECT	GO:0005783~endoplasmic reticulum	4	2.1978	1	P25297, P48813, P32472, P21147	PHO84, GNP1, FPR2, OLE1	181	636	5861	0.203655	1	1	100
UP_SEQ_FEATURE	transmembrane region	5	2.74725	1	Q08234, P25297, P48813, P35180, P21147	YOL075C, PHO84, GNP1, TOM20, OLE1	182	1164	5872	0.13859	1	1	100
UP_KEYWORDS	Transmembrane helix	5	2.74725	1	Q08234, P25297, P48813, P35180, P21147	YOL075C, PHO84, GNP1, TOM20, OLE1	182	1176	5914	0.138157	1	1	100
UP_KEYWORDS	Transmembrane	5	2.74725	1	Q08234, P25297, P48813, P35180, P21147	YOL075C, PHO84, GNP1, TOM20, OLE1	182	1182	5914	0.137456	1	1	100
GOTERM_CC_DIRECT	GO:0016021~integral component of membrane	5	2.74725	1	Q08234, P25297, P48813, P35180, P21147	YOL075C, PHO84, GNP1, TOM20, OLE1	181	1326	5861	0.122101	1	1	100
GOTERM_CC_DIRECT	GO:0016020~membrane	9	4.94505	1	Q08234, Q12518, Q07807, P25297, P48813, P35180, P32472, P21147, P53848	YOL075C, ENT1, PUF3, PHO84, GNP1, TOM20, FPR2, OLE1, FOL1	181	1738	5861	0.167682	1	1	100
UP_KEYWORDS	Membrane	9	4.94505	1	Q08234, Q12518, Q07807, P25297, P48813, P35180, P32472, P21147, P53848	YOL075C, ENT1, PUF3, PHO84, GNP1, TOM20, FPR2, OLE1, FOL1	182	1712	5914	0.170824	1	1	100

## Sheet: Cluster 2
Annotation Cluster 1	Enrichment Score: 14.501204351368186
Category	Term	Count	%	PValue	Genes/Uniprot	Gene Names	List Total	Pop Hits	Pop Total	Fold Enrichment	Bonferroni	Benjamini	FDR
UP_KEYWORDS	Ribosome biogenesis	58	10.9641	8.00183e-19	P53734, Q6Q547, Q08962, P25382, P53254, Q04217, P48234, P35194, P39516, P38779, P40991, P42945, P53136, P36136, P25368, P39744, P40498, P53927, Q08647, P42846, Q07623, P28000, Q12522, P38789, P46669, P33201, Q12460, Q01855, P40078, Q12024, Q01560, P38112, P53276, P32899, P47108, Q08235, P20484, Q12499, P32892, Q07844, Q06679, P43586, Q05942, Q07381, P38719, Q05946, P07703, P38712, P53941, Q06344,…	DBP6, NOP10, NIP7, RSA4, UTP22, ECM16, ENP2, UTP20, RPS14B, CIC1, NOP2, UTP10, NSA1, SHB17, RRP7, NOC2, UTP25, NOP15, PUS7, KRI1, NOP6, RPC19, TIF6, SSF1, RPA43, MRT4, NOP56, RPS15, NSA2, YTM1, NPL3, MAK5, UTP8, IMP3, URB2, BRX1, MAK11, NOP58, DRS1, RIX7, UTP4, LOC1, RSA3, TSR1, DBP8, UTP13, RPC40, RRP3, IMP4, ESF1, DIM1, CBF5, RPC10, RPS2, NOP53, RPB10, RPB5, KRR1	529	179	5914	3.62244	2.00846e-16	5.02115e-17	1.04017e-15
GOTERM_CC_DIRECT	GO:0005730~nucleolus	73	13.7996	1.90818e-18	P53734, P39521, P29295, Q6Q547, P53738, Q08962, P52910, P53256, P25382, P53254, P54780, P33399, Q04217, Q06205, Q12277, P48234, P35194, P38779, P39516, P40991, Q06631, P42945, P53136, P25368, P39744, P40498, P53927, P42846, Q07623, P28000, P38789, Q12522, P46669, P33201, P53914, Q12460, P21304, P40078, P38205, Q03862, Q12024, Q00684, P38112, Q01560, P47047, P26793, P53276, P32899, P47108, Q08235,…	DBP6, FHL1, HRR25, NOP10, TRM112, NIP7, ACS2, RRP46, RSA4, UTP22, RPL15B, LHP1, ECM16, FPR4, RRP42, ENP2, UTP20, CIC1, RPS14B, NOP2, BFR2, UTP10, NSA1, RRP7, NOC2, UTP25, NOP15, KRI1, NOP6, RPC19, SSF1, TIF6, RPA43, MRT4, KRE33, NOP56, PWP1, NSA2, NCL1, ARX1, YTM1, CDC14, MAK5, NPL3, MTR4, RAD27, UTP8, IMP3, URB2, BRX1, MAK11, NOP58, DRS1, POL5, RIX7, LOC1, UTP4, RSA3, TSR1, DBP8, UTP13, RRP3, RP…	527	271	5861	2.99581	5.97262e-16	2.98631e-16	2.5664e-15
GOTERM_BP_DIRECT	GO:0042254~ribosome biogenesis	61	11.5312	1.1275e-17	P53734, Q6Q547, Q08962, P25382, P53254, Q04217, P48234, P35194, P39516, P38779, P40991, P42945, P53136, P36136, P25368, P40024, P39744, P40498, P53927, Q08647, P42846, Q07623, P28000, Q12522, P38789, P46669, P33201, Q12460, Q01855, P40078, Q12024, P87262, Q01560, P38112, P53276, P32899, P47108, Q08235, P20484, P05759, Q12499, P32892, Q07844, Q06679, P43586, Q05942, Q07381, P38719, Q05946, P07703,…	DBP6, NOP10, NIP7, RSA4, UTP22, ECM16, ENP2, UTP20, RPS14B, CIC1, NOP2, UTP10, NSA1, SHB17, RRP7, ARB1, NOC2, UTP25, NOP15, PUS7, KRI1, NOP6, RPC19, TIF6, SSF1, RPA43, MRT4, NOP56, RPS15, NSA2, YTM1, RPL34A, NPL3, MAK5, UTP8, IMP3, URB2, BRX1, MAK11, RPS31, NOP58, DRS1, RIX7, UTP4, LOC1, RSA3, TSR1, DBP8, UTP13, RPC40, RRP3, IMP4, ESF1, DIM1, CBF5, RPC10, RPS2, NOP53, RPB10, RPB5, KRR1	517	199	5557	3.29478	1.12525e-14	5.62625e-15	1.78097e-14
GOTERM_BP_DIRECT	GO:0006364~rRNA processing	53	10.0189	6.1478e-12	P53734, Q6Q547, P53256, P53254, Q04217, Q12277, P48234, P35194, P39516, P53131, P40991, P42945, Q06631, P53136, P25368, P40498, P53927, Q08647, P42846, Q07623, P38788, Q12522, P33201, P53914, Q12460, P21304, P40078, Q12024, Q04600, Q01560, P38112, P47047, Q03264, P53276, P32899, P47108, Q12499, P32892, P22147, Q06679, P38719, Q05946, P38712, P53941, Q06344, P38768, P25040, Q12149, P41819, P33322,…	DBP6, NOP10, RRP46, UTP22, ECM16, RRP42, ENP2, UTP20, RPS14B, PRP43, NOP2, UTP10, BFR2, NSA1, RRP7, UTP25, NOP15, PUS7, KRI1, NOP6, SSZ1, TIF6, MRT4, KRE33, NOP56, PWP1, NSA2, YTM1, TMA64, NPL3, MAK5, MTR4, NGL2, UTP8, IMP3, URB2, NOP58, DRS1, XRN1, UTP4, DBP8, UTP13, RRP3, IMP4, ESF1, PIH1, TSR4, RRP6, DIM1, CBF5, RPS2, NOP53, KRR1	517	206	5557	2.7654	6.13556e-09	1.53389e-09	9.71097e-09
UP_KEYWORDS	rRNA processing	42	7.93951	2.94666e-09	P53914, P53734, P40078, Q12024, Q6Q547, Q01560, P38112, P47047, P53276, P32899, P53256, P53254, P47108, Q12499, Q04217, P22147, Q12277, P48234, P35194, Q06679, P39516, P40991, P38719, Q05946, P42945, P53136, P25368, P40498, P38712, P53941, Q06344, Q08647, P53927, P42846, Q07623, P25040, Q12149, P41819, P33322, P25443, Q12080, P25586	KRE33, DBP6, NSA2, YTM1, NOP10, NPL3, MAK5, MTR4, UTP8, IMP3, RRP46, UTP22, URB2, NOP58, ECM16, XRN1, RRP42, ENP2, UTP20, UTP4, RPS14B, NOP2, DBP8, UTP13, UTP10, NSA1, RRP7, UTP25, RRP3, IMP4, ESF1, PUS7, NOP15, KRI1, NOP6, TSR4, RRP6, DIM1, CBF5, RPS2, NOP53, KRR1	529	173	5914	2.71412	7.39612e-07	9.24515e-08	3.8304e-06
Annotation Cluster 2	Enrichment Score: 9.411647336197747
Category	Term	Count	%	PValue	Genes/Uniprot	Gene Names	List Total	Pop Hits	Pop Total	Fold Enrichment	Bonferroni	Benjamini	FDR
UP_KEYWORDS	Protein biosynthesis	50	9.4518	5.69115e-25	P10081, P38708, P38707, P14741, P39936, P39935, P06634, P38431, P36008, P04802, P04801, P05453, P13188, P07284, P09032, P46655, Q05506, P32911, P32481, P06103, P23301, Q12522, P20459, P12754, P34167, P36421, P53852, P35691, P12385, P16521, P38912, P32324, P53235, P07260, P38249, P32501, Q12109, P09436, P40217, P15625, P15624, P26637, P12962, P32497, P25039, P32502, P02994, P39730, Q04067, P15180	TIF1, YHR020W, DED81, GCN3, TIF4632, TIF4631, DED1, TIF5, TEF4, DPS1, THS1, SUP35, GLN4, SES1, GCD1, GUS1, YDR341C, SUI1, GCD11, PRT1, HYP2, TIF6, SUI2, GCD2, TIF3, TYS1, YNL247W, TMA19, SUP45, YEF3, TIF11, EFT1, YGR054W, CDC33, RPG1, GCD6, WRS1, ILS1, TIF34, FRS2, FRS1, CDC60, CAF20, NIP1, MEF1, GCD7, TEF1, FUN12, TIF35, KRS1	529	104	5914	5.3748	1.42848e-22	1.42848e-22	7.39799e-22
UP_KEYWORDS	Initiation factor	24	4.53686	5.13953e-19	P32501, P12754, P10081, P34167, P40217, P12962, P14741, P32497, P39936, P39935, P06634, P38431, P32502, P32481, P38912, P06103, Q04067, P39730, P20459, P09032, Q12522, P53235, P07260, P38249	GCD6, GCD2, TIF1, TIF3, TIF34, CAF20, GCN3, NIP1, TIF4632, TIF4631, DED1, TIF5, GCD7, GCD11, TIF11, PRT1, TIF35, FUN12, SUI2, GCD1, TIF6, YGR054W, CDC33, RPG1	529	30	5914	8.94367	1.29002e-16	4.30008e-17	6.68094e-16
GOTERM_MF_DIRECT	GO:0003743~translation initiation factor activity	27	5.10397	1.35423e-18	P12754, P10081, P34167, Q04600, P14741, P39936, P39935, P38431, P06634, P38912, P09032, P53235, P07260, P38249, P32501, P32911, P40217, P12962, P32497, P32502, P32481, P06103, P23301, P39730, Q04067, P20459, Q12522	GCD2, TIF1, TIF3, TMA64, GCN3, TIF4632, TIF4631, TIF5, DED1, TIF11, GCD1, YGR054W, CDC33, RPG1, GCD6, SUI1, TIF34, CAF20, NIP1, GCD7, GCD11, PRT1, HYP2, FUN12, TIF35, SUI2, TIF6	487	37	4885	7.31977	7.63787e-16	7.63787e-16	1.98316e-15
GOTERM_BP_DIRECT	GO:0006413~translational initiation	27	5.10397	1.16179e-14	P12754, P10081, P34167, Q04600, P14741, P39936, P39935, P38431, P06634, P38912, P09032, P53235, P07260, P38249, P32501, P32911, P40217, P12962, P32497, P32502, P32481, P06103, P23301, P39730, Q04067, P20459, Q12522	GCD2, TIF1, TIF3, TMA64, GCN3, TIF4632, TIF4631, TIF5, DED1, TIF11, GCD1, YGR054W, CDC33, RPG1, GCD6, SUI1, TIF34, CAF20, NIP1, GCD7, GCD11, PRT1, HYP2, FUN12, TIF35, SUI2, TIF6	517	50	5557	5.80422	1.1634e-11	3.87801e-12	1.84186e-11
GOTERM_BP_DIRECT	GO:0006446~regulation of translational initiation	14	2.6465	5.31828e-10	P32501, P12754, P10081, P40217, P14741, P32497, P04147, P38431, P32502, P06103, Q04067, P39730, P09032, P38249	GCD6, GCD2, TIF1, TIF34, GCN3, NIP1, PAB1, TIF5, GCD7, PRT1, TIF35, FUN12, GCD1, RPG1	517	19	5557	7.91998	5.30764e-07	1.06153e-07	8.40059e-07
GOTERM_CC_DIRECT	GO:0043614~multi-eIF complex	9	1.70132	1.53122e-07	P32911, P32481, P06103, P40217, Q04067, P20459, P32497, P38249, P38431	SUI1, GCD11, PRT1, TIF34, TIF35, SUI2, NIP1, RPG1, TIF5	527	10	5861	10.0093	4.7926e-05	5.99088e-06	0.00020594
GOTERM_MF_DIRECT	GO:0031369~translation initiation factor binding	11	2.0794	1.649e-07	P32911, P32481, P06103, P38912, P33892, P39730, P20433, P32497, P39936, P43535, P38431	SUI1, GCD11, PRT1, TIF11, GCN1, FUN12, RPB4, NIP1, TIF4632, GCN20, TIF5	487	15	4885	7.35592	9.29994e-05	1.55005e-05	0.000241482
KEGG_PATHWAY	sce03013:RNA transport	31	5.86011	4.64673e-07	P12754, P10081, P34167, P52593, P30771, P14741, P39936, P39935, P38431, P34232, Q12159, P38912, P38181, P09032, P07260, P38249, P32501, P32835, P32911, P40064, P40217, P32497, P04147, P50623, P32502, P02994, P32481, P06103, P39730, Q04067, P20459	GCD2, TIF1, TIF3, NUP188, NAM7, GCN3, TIF4632, TIF4631, TIF5, MTR2, YRA1, TIF11, NUP170, GCD1, CDC33, RPG1, GCD6, GSP1, SUI1, NUP157, TIF34, NIP1, PAB1, UBC9, GCD7, TEF1, GCD11, PRT1, FUN12, TIF35, SUI2	282	93	2194	2.59338	4.46077e-05	2.23041e-05	0.000511789
GOTERM_BP_DIRECT	GO:0001731~formation of translation preinitiation complex	11	2.0794	1.86884e-06	P32911, P32481, P34167, P06103, P38912, P40217, Q04067, Q04600, P20459, P32497, P38249	SUI1, GCD11, TIF3, PRT1, TIF11, TIF34, TIF35, TMA64, SUI2, NIP1, RPG1	517	19	5557	6.22284	0.00186336	0.000186493	0.00295191
GOTERM_CC_DIRECT	GO:0033290~eukaryotic 48S preinitiation complex	10	1.89036	2.27534e-06	P32481, P06103, P38912, P40217, Q04067, P39730, P20459, P32497, P38249, P38431	GCD11, PRT1, TIF11, TIF34, TIF35, FUN12, SUI2, NIP1, RPG1, TIF5	527	16	5861	6.9509	0.00071193	7.12158e-05	0.00306017
GOTERM_CC_DIRECT	GO:0016282~eukaryotic 43S preinitiation complex	8	1.51229	0.00015293	P32911, P32481, P06103, P38912, P40217, Q04067, P32497, P38249	SUI1, GCD11, PRT1, TIF11, TIF34, TIF35, NIP1, RPG1	527	15	5861	5.93144	0.0467431	0.00298746	0.205487
GOTERM_CC_DIRECT	GO:0005852~eukaryotic translation initiation factor 3 complex	5	0.94518	0.00334777	P06103, P40217, Q04067, P32497, P38249	PRT1, TIF34, TIF35, NIP1, RPG1	527	8	5861	6.9509	0.649926	0.0427912	4.40993
GOTERM_BP_DIRECT	GO:0002188~translation reinitiation	3	0.567108	0.0712187	P40217, Q04067, P38249	TIF34, TIF35, RPG1	517	5	5557	6.44913	1	0.707387	68.8706
Annotation Cluster 3	Enrichment Score: 8.703731425789579
Category	Term	Count	%	PValue	Genes/Uniprot	Gene Names	List Total	Pop Hits	Pop Total	Fold Enrichment	Bonferroni	Benjamini	FDR
UP_KEYWORDS	Amino-acid biosynthesis	31	5.86011	4.96493e-10	P00927, P32389, P32582, P14843, P06168, Q12166, P17423, P00899, P10869, P03965, P07285, P00498, P13663, Q12122, P32178, P32449, P07342, P42941, P28777, P38891, P49090, P07702, P16120, P22768, P40545, P25605, P05694, P32264, Q08985, P48570, Q06489	ILV1, MET4, CYS4, ARO3, ILV5, LEU9, THR1, TRP2, HOM3, CPA2, TRP4, HIS1, HOM2, LYS21, ARO7, ARO4, ILV2, SER2, ARO2, BAT1, ASN2, LYS2, THR4, ARG1, HIS6, ILV6, MET6, PRO1, SAM4, LYS20, MRI1	529	97	5914	3.57286	1.2462e-07	1.78028e-08	6.45396e-07
GOTERM_BP_DIRECT	GO:0008652~cellular amino acid biosynthetic process	31	5.86011	1.25624e-09	P00927, P32389, P32582, P14843, P06168, Q12166, P17423, P00899, P10869, P03965, P07285, P00498, P13663, Q12122, P32178, P32449, P07342, P42941, P28777, P38891, P49090, P07702, P16120, P22768, P40545, P25605, P05694, P32264, Q08985, P48570, Q06489	ILV1, MET4, CYS4, ARO3, ILV5, LEU9, THR1, TRP2, HOM3, CPA2, TRP4, HIS1, HOM2, LYS21, ARO7, ARO4, ILV2, SER2, ARO2, BAT1, ASN2, LYS2, THR4, ARG1, HIS6, ILV6, MET6, PRO1, SAM4, LYS20, MRI1	517	97	5557	3.4351	1.25373e-06	2.08955e-07	1.98432e-06
KEGG_PATHWAY	sce01230:Biosynthesis of amino acids	40	7.56144	1.24114e-08	P53090, P00927, P37292, P32582, P14843, P06168, Q12166, P17423, P19358, P00899, P10869, P07285, P13663, P00498, Q12122, P14540, P32178, Q12265, P00812, P32895, P32449, P07342, P42941, P28777, P38689, P38891, P36136, P07702, P16120, P10659, P21954, P23254, P22768, P40545, P25605, P32288, P32264, P05694, P48570, P19414	ARO8, ILV1, SHM1, CYS4, ARO3, ILV5, LEU9, THR1, SAM2, TRP2, HOM3, TRP4, HOM2, HIS1, LYS21, FBA1, ARO7, PRS5, CAR1, PRS1, ARO4, ILV2, SER2, ARO2, PRS3, BAT1, SHB17, LYS2, THR4, SAM1, IDP1, TKL1, ARG1, HIS6, ILV6, GLN1, PRO1, MET6, LYS20, ACO1	282	123	2194	2.53013	1.19149e-06	1.19149e-06	1.36698e-05
Annotation Cluster 4	Enrichment Score: 6.339142742298062
Category	Term	Count	%	PValue	Genes/Uniprot	Gene Names	List Total	Pop Hits	Pop Total	Fold Enrichment	Bonferroni	Benjamini	FDR
UP_KEYWORDS	Nucleotide-binding	115	21.7391	2.99192e-09	Q12236, P10081, P53599, P06786, P32589, P18562, P20424, P47912, P04802, P04801, P05453, P04807, P13188, Q04217, P46655, P39517, P48562, P39079, P47143, P53131, P39076, P39077, P38689, P39078, P49090, P40024, P22768, P47037, P32481, P43535, P53914, P53145, Q05931, P36421, P10592, P30771, P19358, P20449, P0CS90, P32892, P25454, P40413, Q12265, P32895, Q12109, P38972, P15625, P15624, P25039, P02994,…	PKH2, TIF1, SSK2, TOP2, SSE1, FUR1, SRP54, FAA4, DPS1, THS1, SUP35, HXK2, GLN4, ECM16, GUS1, DHH1, CLA4, CCT6, ADO1, PRP43, CCT2, CCT3, PRS3, CCT4, ASN2, ARB1, ARG1, SMC3, GCD11, GCN20, KRE33, LSG1, SSQ1, TYS1, SSA2, NAM7, SAM2, DBP5, SSC1, DRS1, RAD51, CCT5, PRS5, PRS1, WRS1, ADE6, FRS2, FRS1, MEF1, TEF1, MSS116, GLN1, FUN12, CAB1, HSP60, KRS1, DBP6, HSC82, YHR020W, HRR25, DED81, MPS3, SNU114, T…	529	760	5914	1.69165	7.50972e-07	8.34414e-08	3.88924e-06
GOTERM_MF_DIRECT	GO:0000166~nucleotide binding	131	24.7637	1.02093e-08	Q12236, P53599, P06786, P32589, P18562, P20424, P47912, P04802, P04801, P05453, P04807, P13188, Q04217, P46655, P39517, P48562, P39079, P47143, P53131, P39076, P38689, P39077, P39078, P49090, P40024, P22768, P47037, P32481, Q07623, P06103, P43535, P53914, P53145, Q05931, P36421, P34167, P10592, P30771, Q01560, P19358, P20449, P0CS90, P34761, P32892, P25454, P40413, Q12265, P39985, P32895, P21951,…	PKH2, SSK2, TOP2, SSE1, FUR1, SRP54, FAA4, DPS1, THS1, SUP35, HXK2, GLN4, ECM16, GUS1, DHH1, CLA4, CCT6, ADO1, PRP43, CCT2, PRS3, CCT3, CCT4, ASN2, ARB1, ARG1, SMC3, GCD11, NOP6, PRT1, GCN20, KRE33, LSG1, SSQ1, TYS1, TIF3, SSA2, NAM7, NPL3, SAM2, DBP5, SSC1, WHI3, DRS1, RAD51, CCT5, PRS5, POL5, PRS1, POL2, WRS1, ADE6, FRS2, FRS1, MEF1, RPL25, MOT2, MSS116, GLN1, FUN12, TIF35, RPB4, CAB1, HSP60, K…	487	834	4885	1.57558	5.75804e-06	1.43951e-06	1.49507e-05
UP_KEYWORDS	ATP-binding	100	18.9036	2.09915e-08	Q12236, P53734, P15108, P10081, P38708, P53599, P29295, P38707, P47069, P06786, P17423, P32589, P06634, P10869, P52910, P03965, P29496, P47912, P00498, P04802, P04801, P47079, P04807, Q04217, P13188, P07284, P46655, Q08972, P23292, Q05506, P21524, P39517, P48562, P39079, P47143, P53131, Q00955, P12612, P10363, Q03497, P39076, P38689, P39077, P49090, P39078, P40024, P47100, P10659, P34253, Q06178,…	PKH2, DBP6, HSC82, TIF1, YHR020W, SSK2, HRR25, DED81, MPS3, TOP2, THR1, SSE1, DED1, HOM3, ACS2, CPA2, MCM5, FAA4, HIS1, DPS1, THS1, CCT8, HXK2, ECM16, GLN4, SES1, GUS1, NEW1, YCK2, YDR341C, RNR1, DHH1, CLA4, CCT6, ADO1, PRP43, ACC1, TCP1, PRI1, STE20, CCT2, PRS3, CCT3, ASN2, CCT4, ARB1, TY1B-JR2, SAM1, KTI12, NMA1, PDR5, ARG1, SMC3, SKI2, RVB1, SCH9, PRO1, SSZ1, OLA1, GCN20, VIP1, KRE33, SSQ1, TY…	529	651	5914	1.71729	5.26884e-06	4.39071e-07	2.7287e-05
GOTERM_MF_DIRECT	GO:0005524~ATP binding	104	19.6597	9.90354e-07	Q12236, P10081, P53599, P06786, P32589, P47912, P04802, P04801, P04807, P13188, Q04217, P46655, P39517, P48562, P47143, P39079, P53131, P39076, P39077, P38689, P39078, P49090, P40024, P22768, P47037, P43535, P53914, P53009, Q05931, P36421, P10592, P30771, P19358, P20449, P0CS90, P32892, P25454, P40413, Q12265, P32895, Q12109, P38972, P15625, P15624, P16140, P15424, P32288, Q04430, P19882, P15180,…	PKH2, TIF1, SSK2, TOP2, SSE1, FAA4, DPS1, THS1, HXK2, GLN4, ECM16, GUS1, DHH1, CLA4, ADO1, CCT6, PRP43, CCT2, CCT3, PRS3, CCT4, ASN2, ARB1, ARG1, SMC3, GCN20, KRE33, SCY1, SSQ1, TYS1, SSA2, NAM7, SAM2, DBP5, SSC1, DRS1, RAD51, CCT5, PRS5, PRS1, WRS1, ADE6, FRS2, FRS1, VMA2, MSS116, GLN1, CAB1, HSP60, KRS1, HSC82, DBP6, YHR020W, HRR25, DED81, MPS3, THR1, DED1, HOM3, ACS2, MCM5, CPA2, HIS1, CCT8, S…	487	668	4885	1.56168	0.000558404	6.98176e-05	0.00145028
UP_SEQ_FEATURE	nucleotide phosphate-binding region:ATP	47	8.88469	0.0317326	P53914, Q12236, P53734, P10081, P53599, P29295, P32908, P32528, P47069, P30771, P06786, P38112, P17423, P19358, P47047, P06634, P03965, P29496, P20449, P04807, P32892, P25454, Q04217, P07284, Q07844, P46655, P23292, P48562, P39517, P53131, P38629, Q00955, P38719, Q03497, P38972, P38712, Q08732, P10659, P34253, P38625, P33302, P22768, P47037, P35207, Q03940, P11792, P15424	KRE33, PKH2, DBP6, TIF1, SSK2, HRR25, SMC1, DUR1,2, MPS3, NAM7, TOP2, MAK5, THR1, SAM2, MTR4, DED1, CPA2, MCM5, DBP5, HXK2, DRS1, RAD51, ECM16, SES1, RIX7, GUS1, YCK2, CLA4, DHH1, PRP43, RFC3, ACC1, DBP8, STE20, ADE6, RRP3, HRK1, SAM1, KTI12, GUA1, PDR5, ARG1, SMC3, SKI2, RVB1, SCH9, MSS116	529	390	5872	1.33772	1	0.864086	40.3396
Annotation Cluster 5	Enrichment Score: 5.86218063256362
Category	Term	Count	%	PValue	Genes/Uniprot	Gene Names	List Total	Pop Hits	Pop Total	Fold Enrichment	Bonferroni	Benjamini	FDR
GOTERM_MF_DIRECT	GO:0051082~unfolded protein binding	26	4.91493	1.23405e-07	Q05931, P15108, P10592, P46988, P47103, P38910, P40005, P0CS90, P47079, O74700, P40413, P35184, P39079, P12612, P25303, P38523, P46956, P39076, P39077, P39078, P38837, P87108, P25491, Q04493, P38788, P19882	SSQ1, HSC82, SSA2, PFD1, CPR7, HSP10, GIM4, SSC1, CCT8, TIM9, CCT5, SQT1, CCT6, TCP1, SCJ1, MGE1, PHO86, CCT2, CCT3, CCT4, NSG1, TIM10, YDJ1, GIM5, SSZ1, HSP60	487	81	4885	3.21976	6.95981e-05	1.392e-05	0.000180716
GOTERM_BP_DIRECT	GO:0006457~protein folding	25	4.7259	4.36909e-06	P15108, P10592, P33313, P46988, P32589, P47103, P15705, P38910, P40005, P0CS90, P47079, P40413, Q06205, P39079, P12612, P25303, P38523, P46956, P39076, P39077, P39078, P25491, P38768, Q04493, P19882	HSC82, SSA2, CNS1, PFD1, SSE1, CPR7, STI1, HSP10, GIM4, SSC1, CCT8, CCT5, FPR4, CCT6, TCP1, SCJ1, MGE1, PHO86, CCT2, CCT3, CCT4, YDJ1, PIH1, GIM5, HSP60	517	96	5557	2.7991	0.00435087	0.000363297	0.00690105
UP_KEYWORDS	Chaperone	25	4.7259	4.80545e-06	Q05931, P15108, P40202, P33313, P46988, P32589, Q12118, P38910, P40005, P0CS90, P47079, O74700, P40413, Q06205, P39079, P12612, P25303, P38523, P39076, P39077, P39078, P25491, P87108, Q04493, P19882	SSQ1, HSC82, CCS1, CNS1, PFD1, SSE1, SGT2, HSP10, GIM4, SSC1, CCT8, TIM9, CCT5, FPR4, CCT6, TCP1, SCJ1, MGE1, CCT2, CCT3, CCT4, YDJ1, TIM10, GIM5, HSP60	529	100	5914	2.7949	0.00120544	6.70072e-05	0.00624648
Annotation Cluster 6	Enrichment Score: 5.708756131209442
Category	Term	Count	%	PValue	Genes/Uniprot	Gene Names	List Total	Pop Hits	Pop Total	Fold Enrichment	Bonferroni	Benjamini	FDR
GOTERM_BP_DIRECT	GO:0006412~translation	82	15.5009	1.34428e-18	O14455, P39939, P39938, P38988, P38708, P38175, P38707, P0CX50, P14741, P36048, P39936, P39935, P38431, P06634, P36008, Q12672, P51402, P04802, P46990, P04801, P54780, P05453, P13188, P09032, P07284, P20084, P46655, Q05506, P39516, P32911, P0CX40, P0CX46, P0CX44, P32481, P06103, P23301, P0C2H8, P20459, Q12522, P12754, P0CX34, P36421, P34167, Q01855, P21771, P31334, P53852, P87262, P35691, P12385,…	RPL36B, RPS26B, RPS26A, GGC1, YHR020W, MRP21, DED81, RPL18B, GCN3, SNU114, TIF4632, TIF4631, TIF5, DED1, TEF4, RPL21B, RPL37B, DPS1, RPL17B, THS1, RPL15B, SUP35, GLN4, GCD1, SES1, MRPL33, GUS1, YDR341C, RPS14B, SUI1, RPS8B;RPS8A, RPL2B, RPL1B, GCD11, PRT1, HYP2, RPL31A, SUI2, TIF6, GCD2, RPS30B;RPS30A, TYS1, TIF3, RPS15, MRPS28, MRPL9, YNL247W, RPL34A, TMA19, SUP45, YEF3, TIF11, RPS31, RPS29A, RP…	517	318	5557	2.77164	1.34159e-15	1.34159e-15	2.12338e-15
GOTERM_CC_DIRECT	GO:0005840~ribosome	60	11.3422	3.27479e-09	O14455, P39939, P10081, P39938, P38708, P38175, P0CX50, P36008, P25382, Q12672, P46990, P51402, P54780, P20084, P39516, P40024, Q03976, P0CX40, P0CX46, Q08548, P0CX44, P53292, P38747, P0C2H8, P20459, Q03016, Q05580, P0CX34, Q01855, P38821, P21771, P53852, P31334, P87262, Q04600, P35691, P38828, Q08229, P16521, P12686, P05759, P41057, P41058, P32324, P53235, P07260, Q12000, P53881, Q03799, P26783,…	RPL36B, RPS26B, TIF1, RPS26A, YHR020W, MRP21, RPL18B, TEF4, RSA4, RPL21B, RPL17B, RPL37B, RPL15B, MRPL33, RPS14B, ARB1, RSM24, RPS8B;RPS8A, RPL2B, ALE1, RPL1B, MRPS35, OTU2, RPL31A, SUI2, GIP3, YDR266C, RPS30B;RPS30A, RPS15, APE4, MRPS28, YNL247W, MRPL9, RPL34A, TMA64, TMA19, LSM12, NBA1, YEF3, MRP13, RPS31, RPS29A, RPS29B, EFT1, YGR054W, CDC33, TMA46, MRPL22, MRPS8, RPS5, PAB1, RPS12, YML6, RPL3…	527	301	5861	2.2169	1.02501e-06	1.70835e-07	4.4044e-06
GOTERM_CC_DIRECT	GO:0030529~intracellular ribonucleoprotein complex	61	11.5312	3.5052e-09	O14455, P39939, P39938, P38175, Q6Q547, P0CX50, P20424, P53254, P46990, P51402, Q12672, P54780, P33399, Q04217, P20084, P32342, P35194, P39516, P38687, P42945, P40498, P0CX40, Q03976, P0CX46, P43321, P0CX44, P53927, P53292, P0C2H8, Q12460, P0CX34, Q01855, P21771, P31334, P87262, Q01560, P53276, P29478, P32899, P12686, P05759, Q12499, P41057, P41058, Q06679, Q05942, Q05946, P53881, Q03799, P53941,…	RPL36B, RPS26B, RPS26A, MRP21, NOP10, RPL18B, SRP54, UTP22, RPL17B, RPL37B, RPL21B, RPL15B, LHP1, ECM16, MRPL33, SRP21, UTP20, RPS14B, SRP68, UTP10, UTP25, RPS8B;RPS8A, RSM24, RPL2B, SMD3, RPL1B, NOP15, MRPS35, RPL31A, NOP56, RPS30B;RPS30A, RPS15, MRPS28, MRPL9, RPL34A, NPL3, UTP8, SEC65, IMP3, MRP13, RPS31, NOP58, RPS29A, RPS29B, UTP4, RSA3, UTP13, MRPL22, MRPS8, IMP4, RPS5, RPS12, YML6, RPL37A,…	527	309	5861	2.1955	1.09713e-06	1.56732e-07	4.7143e-06
UP_KEYWORDS	Ribonucleoprotein	60	11.3422	4.02683e-09	O14455, P39939, P39938, P38175, Q6Q547, P0CX50, P20424, P53254, P46990, P51402, Q12672, P54780, Q04217, P20084, P32342, P35194, P39516, P38687, P42945, P40498, P0CX40, Q03976, P0CX46, P43321, P0CX44, P53927, P53292, P0C2H8, Q12460, P0CX34, Q01855, P21771, P31334, P87262, Q01560, P53276, P29478, P32899, P12686, P05759, Q12499, P41057, P41058, Q06679, Q05942, Q05946, P53881, Q03799, P53941, P26783,…	RPL36B, RPS26B, RPS26A, MRP21, NOP10, RPL18B, SRP54, UTP22, RPL17B, RPL37B, RPL21B, RPL15B, ECM16, MRPL33, SRP21, UTP20, RPS14B, SRP68, UTP10, UTP25, RPS8B;RPS8A, RSM24, RPL2B, SMD3, RPL1B, NOP15, MRPS35, RPL31A, NOP56, RPS30B;RPS30A, RPS15, MRPS28, MRPL9, RPL34A, NPL3, UTP8, SEC65, IMP3, MRP13, RPS31, NOP58, RPS29A, RPS29B, UTP4, RSA3, UTP13, MRPL22, MRPS8, IMP4, RPS5, RPS12, YML6, RPL37A, RPL25…	529	304	5914	2.2065	1.01073e-06	1.01073e-07	5.23453e-06
UP_KEYWORDS	Ribosomal protein	37	6.99433	0.000152821	O14455, P39939, P39938, P0CX34, Q01855, P21771, P38175, P31334, P0CX50, P87262, P12686, P46990, P51402, Q12672, P05759, P54780, P41057, P41058, P20084, P39516, P53881, Q03799, P0CX40, Q03976, P26783, P0CX46, P48589, P51998, P0CX44, P49166, P04456, P53292, P05743, P05748, P0C2H8, P25443, P36516	RPL36B, RPS26B, RPS26A, RPS30B;RPS30A, RPS15, MRPS28, MRP21, MRPL9, RPL18B, RPL34A, MRP13, RPL17B, RPL37B, RPL21B, RPS31, RPL15B, RPS29A, RPS29B, MRPL33, RPS14B, MRPL22, MRPS8, RPS8B;RPS8A, RSM24, RPS5, RPL2B, RPS12, YML6, RPL1B, RPL37A, RPL25, MRPS35, RPL26A, RPL15A, RPL31A, RPS2, MRPL3	529	216	5914	1.91502	0.0376346	0.00191621	0.198472
GOTERM_BP_DIRECT	GO:0002181~cytoplasmic translation	31	5.86011	0.000421533	O14455, P39939, P39938, P0CX34, Q01855, P34167, P0CX50, P87262, P35691, P46990, P51402, Q12672, P05759, P54780, P41057, P41058, P39516, Q12000, P0CX40, P26783, P0CX46, P48589, P0CX44, P49166, P04456, P05743, P05748, P0C2H8, P38788, P38238, P33201	RPL36B, RPS26B, RPS26A, RPS30B;RPS30A, RPS15, TIF3, RPL18B, RPL34A, TMA19, RPL17B, RPL37B, RPL21B, RPS31, RPL15B, RPS29A, RPS29B, RPS14B, TMA46, RPS8B;RPS8A, RPS5, RPL2B, RPS12, RPL1B, RPL37A, RPL25, RPL26A, RPL15A, RPL31A, SSZ1, TRM7, MRT4	517	171	5557	1.94857	0.343465	0.0198377	0.663768
GOTERM_CC_DIRECT	GO:0005622~intracellular	31	5.86011	0.0040692	O14455, P38986, P39939, P39938, P0CX34, P21771, P31334, P0CX50, P87262, Q03264, P18562, P32899, P46990, P51402, Q12672, P54780, P41057, P41058, P53741, P0CX40, P0CX46, P48589, P25039, P49166, P04456, P05743, Q12149, P05748, P0C2H8, P24280, P33201	RPL36B, ASP1, RPS26B, RPS26A, RPS30B;RPS30A, MRPS28, MRPL9, RPL18B, RPL34A, NGL2, FUR1, IMP3, RPL17B, RPL37B, RPL21B, RPL15B, RPS29A, RPS29B, BRE5, RPS8B;RPS8A, RPL2B, RPS12, MEF1, RPL37A, RPL25, RPL26A, RRP6, RPL15A, RPL31A, SEC14, MRT4	527	203	5861	1.69835	0.720921	0.0479016	5.33636
GOTERM_MF_DIRECT	GO:0003735~structural constituent of ribosome	40	7.56144	0.0104333	O14455, P39939, P39938, P0CX34, Q01855, P38988, P21771, P38175, P31334, P0CX50, P87262, P32899, P12686, Q12672, P46990, P51402, P05759, P54780, P41057, P41058, P20084, P39516, P53881, Q03799, P0CX40, Q03976, P26783, P0CX46, P48589, P51998, P0CX44, P49166, P04456, P53292, P05743, P05748, P0C2H8, P25443, P36516, P33201	RPL36B, RPS26B, RPS26A, RPS30B;RPS30A, RPS15, GGC1, MRPS28, MRP21, MRPL9, RPL18B, RPL34A, IMP3, MRP13, RPL21B, RPL17B, RPL37B, RPS31, RPL15B, RPS29A, RPS29B, MRPL33, RPS14B, MRPL22, MRPS8, RPS8B;RPS8A, RSM24, RPS5, RPL2B, RPS12, YML6, RPL1B, RPL37A, RPL25, MRPS35, RPL26A, RPL15A, RPL31A, RPS2, MRPL3, MRT4	487	271	4885	1.48056	0.997302	0.256038	14.2376
GOTERM_CC_DIRECT	GO:0022625~cytosolic large ribosomal subunit	17	3.21361	0.0304784	O14455, P53145, Q03862, P0CX50, P87262, P0CX46, P0CX44, P49166, P04456, P05743, P05748, P51402, Q12672, P46990, P54780, P0C2H8, P33201	RPL36B, LSG1, ARX1, RPL18B, RPL34A, RPL2B, RPL1B, RPL37A, RPL25, RPL26A, RPL15A, RPL37B, RPL21B, RPL17B, RPL15B, RPL31A, MRT4	527	108	5861	1.7506	0.999938	0.2684	34.0514
KEGG_PATHWAY	sce03010:Ribosome	29	5.48204	0.157816	O14455, P39939, P39938, P0CX34, Q01855, P21771, P31334, P0CX50, P87262, P46990, P51402, Q12672, P05759, P54780, P41057, P41058, P39516, P0CX40, P26783, P0CX46, P48589, P0CX44, P51998, P49166, P04456, P05743, P05748, P0C2H8, P25443	RPL36B, RPS26B, RPS26A, RPS30B;RPS30A, RPS15, MRPS28, MRPL9, RPL18B, RPL34A, RPL17B, RPL37B, RPL21B, RPS31, RPL15B, RPS29A, RPS29B, RPS14B, RPS8B;RPS8A, RPS5, RPL2B, RPS12, RPL1B, YML6, RPL37A, RPL25, RPL26A, RPL15A, RPL31A, RPS2	282	181	2194	1.24654	1	0.580135	84.9188
Annotation Cluster 7	Enrichment Score: 5.694345156132301
Category	Term	Count	%	PValue	Genes/Uniprot	Gene Names	List Total	Pop Hits	Pop Total	Fold Enrichment	Bonferroni	Benjamini	FDR
UP_KEYWORDS	rRNA processing	42	7.93951	2.94666e-09	P53914, P53734, P40078, Q12024, Q6Q547, Q01560, P38112, P47047, P53276, P32899, P53256, P53254, P47108, Q12499, Q04217, P22147, Q12277, P48234, P35194, Q06679, P39516, P40991, P38719, Q05946, P42945, P53136, P25368, P40498, P38712, P53941, Q06344, Q08647, P53927, P42846, Q07623, P25040, Q12149, P41819, P33322, P25443, Q12080, P25586	KRE33, DBP6, NSA2, YTM1, NOP10, NPL3, MAK5, MTR4, UTP8, IMP3, RRP46, UTP22, URB2, NOP58, ECM16, XRN1, RRP42, ENP2, UTP20, UTP4, RPS14B, NOP2, DBP8, UTP13, UTP10, NSA1, RRP7, UTP25, RRP3, IMP4, ESF1, PUS7, NOP15, KRI1, NOP6, TSR4, RRP6, DIM1, CBF5, RPS2, NOP53, KRR1	529	173	5914	2.71412	7.39612e-07	9.24515e-08	3.8304e-06
GOTERM_CC_DIRECT	GO:0030686~90S preribosome	24	4.53686	2.68139e-07	P53131, P53914, Q12460, P38719, Q07381, P42945, Q06631, Q05946, P0CX40, P26783, P53941, P53276, P42846, P32899, Q07623, P53254, P41819, P33322, Q12499, Q04217, P48234, P35194, Q06679, P25586	PRP43, KRE33, NOP56, DBP8, TSR1, UTP10, BFR2, UTP13, RPS8B;RPS8A, RPS5, IMP4, UTP8, KRI1, IMP3, NOP6, UTP22, DIM1, CBF5, NOP58, ECM16, ENP2, UTP20, UTP4, KRR1	527	80	5861	3.33643	8.39239e-05	9.32523e-06	0.000360631
GOTERM_BP_DIRECT	GO:0031167~rRNA methylation	19	3.59168	3.40755e-06	P43639, Q12460, P38719, P40991, Q05946, P42945, P25368, P40498, P38712, P53941, P32899, P53254, P41819, Q12499, Q04217, P25443, P35194, Q06679, P25586	CKB1, NOP56, DBP8, NOP2, UTP13, UTP10, RRP7, UTP25, RRP3, IMP4, IMP3, UTP22, DIM1, NOP58, ECM16, RPS2, UTP20, UTP4, KRR1	517	59	5557	3.4614	0.00339496	0.00030911	0.00538231
GOTERM_CC_DIRECT	GO:0032040~small-subunit processome	17	3.21361	6.8771e-06	Q12460, Q05946, Q06631, P42945, P40498, P53941, P53276, P32899, P53254, Q12499, Q04217, P25443, P48234, P35194, Q06679, P25586, P39516	NOP56, UTP13, BFR2, UTP10, UTP25, IMP4, UTP8, IMP3, UTP22, NOP58, ECM16, RPS2, ENP2, UTP20, UTP4, KRR1, RPS14B	527	52	5861	3.63586	0.00215023	0.000195666	0.00924892
GOTERM_BP_DIRECT	GO:0000462~maturation of SSU-rRNA from tricistronic rRNA transcript (SSU-rRNA, 5.8S rRNA, LSU-rRNA)	16	3.02457	0.00182279	P53131, Q07381, Q05946, Q06631, P42945, P40498, P0CX40, P38712, P53276, P53254, P41819, P39730, Q04217, P48234, Q06679, P39516	PRP43, TSR1, UTP13, BFR2, UTP10, UTP25, RPS8B;RPS8A, RRP3, UTP8, UTP22, DIM1, FUN12, ECM16, ENP2, UTP4, RPS14B	517	71	5557	2.42221	0.838105	0.0629595	2.84072
Annotation Cluster 8	Enrichment Score: 4.872983778711382
Category	Term	Count	%	PValue	Genes/Uniprot	Gene Names	List Total	Pop Hits	Pop Total	Fold Enrichment	Bonferroni	Benjamini	FDR
KEGG_PATHWAY	sce01230:Biosynthesis of amino acids	40	7.56144	1.24114e-08	P53090, P00927, P37292, P32582, P14843, P06168, Q12166, P17423, P19358, P00899, P10869, P07285, P13663, P00498, Q12122, P14540, P32178, Q12265, P00812, P32895, P32449, P07342, P42941, P28777, P38689, P38891, P36136, P07702, P16120, P10659, P21954, P23254, P22768, P40545, P25605, P32288, P32264, P05694, P48570, P19414	ARO8, ILV1, SHM1, CYS4, ARO3, ILV5, LEU9, THR1, SAM2, TRP2, HOM3, TRP4, HOM2, HIS1, LYS21, FBA1, ARO7, PRS5, CAR1, PRS1, ARO4, ILV2, SER2, ARO2, PRS3, BAT1, SHB17, LYS2, THR4, SAM1, IDP1, TKL1, ARG1, HIS6, ILV6, GLN1, PRO1, MET6, LYS20, ACO1	282	123	2194	2.53013	1.19149e-06	1.19149e-06	1.36698e-05
KEGG_PATHWAY	sce01110:Biosynthesis of secondary metabolites	61	11.5312	6.34975e-05	P38986, P00927, P37292, P29704, P14843, Q99258, P06168, P17423, P10869, P54115, P52910, P32771, P04161, P00498, P07285, P04807, P14540, P46655, P32449, Q00955, P10614, P38689, P38891, P38221, P49090, P36136, P16120, P10659, P23254, Q08548, P22768, P33401, P40545, P15496, Q08985, P19414, P53090, P05374, P54839, P38720, Q12166, P19358, P00899, P13663, P32178, P11353, Q12265, P43586, P00812, P32895,…	ASP1, ILV1, SHM1, ERG9, ARO3, RIB3, ILV5, THR1, HOM3, ALD6, ACS2, SFA1, ADE8, HIS1, TRP4, HXK2, FBA1, GUS1, ARO4, ACC1, ERG11, PRS3, BAT1, CDS1, ASN2, SHB17, THR4, SAM1, TKL1, ALE1, ARG1, PGM1, HIS6, IDI1, SAM4, ACO1, ARO8, CHO2, ERG13, GND1, LEU9, SAM2, TRP2, HOM2, ARO7, HEM13, PRS5, LOC1, CAR1, PRS1, ILV2, SUR4, ARO2, ADE6, LYS2, HEM15, IDP1, ILV6, IMD3, MET6, MDH2	282	296	2194	1.60334	0.00607741	0.00152283	0.0699137
KEGG_PATHWAY	sce01130:Biosynthesis of antibiotics	43	8.12854	0.00305121	P53090, P00927, P37292, P54839, P32582, P29704, P38720, P14843, P06168, P10869, P54115, P52910, P32771, P04161, P13663, P54781, Q12122, P04807, P14540, P32178, Q12265, P00812, P32895, P32449, P07342, P42941, P10614, P28777, P38972, P38689, P38891, P36136, P07702, P21954, P23254, P22768, P33401, P25605, P15496, P32264, P48570, P22133, P19414	ARO8, ILV1, SHM1, ERG13, CYS4, ERG9, GND1, ARO3, ILV5, HOM3, ALD6, ACS2, SFA1, ADE8, HOM2, ERG5, LYS21, HXK2, FBA1, ARO7, PRS5, CAR1, PRS1, ARO4, ILV2, SER2, ERG11, ARO2, ADE6, PRS3, BAT1, SHB17, LYS2, IDP1, TKL1, ARG1, PGM1, ILV6, IDI1, PRO1, LYS20, MDH2, ACO1	282	219	2194	1.52761	0.25425	0.0320705	3.30972
Annotation Cluster 9	Enrichment Score: 4.864370982260758
Category	Term	Count	%	PValue	Genes/Uniprot	Gene Names	List Total	Pop Hits	Pop Total	Fold Enrichment	Bonferroni	Benjamini	FDR
INTERPRO	IPR027413:GroEL-like equatorial domain	8	1.51229	3.00188e-06	P39079, P12612, P39076, P39077, P47079, P39078, P40413, P19882	CCT6, TCP1, CCT2, CCT3, CCT8, CCT4, CCT5, HSP60	509	9	5053	8.82427	0.00333852	0.00333852	0.00480802
INTERPRO	IPR002423:Chaperonin Cpn60/TCP-1	8	1.51229	9.13932e-06	P39079, P12612, P39076, P39077, P47079, P39078, P40413, P19882	CCT6, TCP1, CCT2, CCT3, CCT8, CCT4, CCT5, HSP60	509	10	5053	7.94185	0.0101296	0.00507769	0.0146375
GOTERM_CC_DIRECT	GO:0005832~chaperonin-containing T-complex	8	1.51229	1.0808e-05	P39079, P12612, P39076, P39077, P47079, P39078, P10592, P40413	CCT6, TCP1, CCT2, CCT3, CCT8, CCT4, SSA2, CCT5	527	11	5861	8.08832	0.0033772	0.000260191	0.0145352
INTERPRO	IPR027409:GroEL-like apical domain	8	1.51229	2.29586e-05	P39079, P12612, P39076, P39077, P47079, P39078, P40413, P19882	CCT6, TCP1, CCT2, CCT3, CCT8, CCT4, CCT5, HSP60	509	11	5053	7.21986	0.0252519	0.00848915	0.0367666
INTERPRO	IPR002194:Chaperonin TCP-1, conserved site	7	1.32325	2.35578e-05	P39079, P12612, P39076, P39077, P47079, P39078, P40413	CCT6, TCP1, CCT2, CCT3, CCT8, CCT4, CCT5	509	8	5053	8.68639	0.0259023	0.00653945	0.037726
INTERPRO	IPR017998:Chaperone tailless complex polypeptide 1 (TCP-1)	7	1.32325	2.35578e-05	P39079, P12612, P39076, P39077, P47079, P39078, P40413	CCT6, TCP1, CCT2, CCT3, CCT8, CCT4, CCT5	509	8	5053	8.68639	0.0259023	0.00653945	0.037726
INTERPRO	IPR027410:TCP-1-like chaperonin intermediate domain	7	1.32325	2.35578e-05	P39079, P12612, P39076, P39077, P47079, P39078, P40413	CCT6, TCP1, CCT2, CCT3, CCT8, CCT4, CCT5	509	8	5053	8.68639	0.0259023	0.00653945	0.037726
Annotation Cluster 10	Enrichment Score: 4.088274922392467
Category	Term	Count	%	PValue	Genes/Uniprot	Gene Names	List Total	Pop Hits	Pop Total	Fold Enrichment	Bonferroni	Benjamini	FDR
UP_KEYWORDS	Ligase	31	5.86011	6.37815e-08	Q05580, P36421, P38708, P53852, P38707, P28274, P32528, P52910, P03965, P47912, P04802, P04801, P13188, P07284, P46655, Q05506, P40318, Q00955, Q12109, P38972, P09436, P49090, P15625, P26637, P15624, P38625, P50623, P19812, P22768, P32288, P15180	YDR266C, TYS1, YHR020W, YNL247W, DED81, URA7, DUR1,2, ACS2, CPA2, FAA4, DPS1, THS1, GLN4, SES1, GUS1, YDR341C, SSM4, ACC1, WRS1, ADE6, ILS1, ASN2, FRS2, CDC60, FRS1, GUA1, UBC9, UBR1, ARG1, GLN1, KRS1	529	117	5914	2.96211	1.6009e-05	1.14351e-06	8.29102e-05
UP_KEYWORDS	Aminoacyl-tRNA synthetase	16	3.02457	1.42439e-07	Q12109, P36421, P38708, P09436, P53852, P38707, P15625, P26637, P15624, P04802, P04801, P13188, P07284, P46655, P15180, Q05506	WRS1, TYS1, YHR020W, ILS1, YNL247W, DED81, FRS2, CDC60, FRS1, DPS1, THS1, GLN4, SES1, GUS1, KRS1, YDR341C	529	36	5914	4.9687	3.57517e-05	2.23452e-06	0.000185159
GOTERM_BP_DIRECT	GO:0006418~tRNA aminoacylation for protein translation	15	2.83554	2.90988e-07	Q12109, P36421, P46672, P38708, P09436, P53852, P38707, P26637, P04802, P04801, P13188, P07284, P46655, P15180, Q05506	WRS1, TYS1, ARC1, YHR020W, ILS1, YNL247W, DED81, CDC60, DPS1, THS1, GLN4, SES1, GUS1, KRS1, YDR341C	517	32	5557	5.03838	0.000290364	4.14857e-05	0.000459634
GOTERM_MF_DIRECT	GO:0004812~aminoacyl-tRNA ligase activity	16	3.02457	5.78186e-07	Q12109, P36421, P38708, P09436, P53852, P38707, P15625, P26637, P15624, P04802, P04801, P13188, P07284, P46655, P15180, Q05506	WRS1, TYS1, YHR020W, ILS1, YNL247W, DED81, FRS2, CDC60, FRS1, DPS1, THS1, GLN4, SES1, GUS1, KRS1, YDR341C	487	36	4885	4.45813	0.000326044	4.65842e-05	0.0008467
GOTERM_MF_DIRECT	GO:0016874~ligase activity	31	5.86011	1.16934e-06	Q05580, P36421, P38708, P53852, P38707, P28274, P32528, P52910, P03965, P47912, P04802, P04801, P13188, P07284, P46655, Q05506, P40318, Q00955, Q12109, P38972, P09436, P49090, P15625, P26637, P15624, P38625, P50623, P19812, P22768, P32288, P15180	YDR266C, TYS1, YHR020W, YNL247W, DED81, URA7, DUR1,2, ACS2, CPA2, FAA4, DPS1, THS1, GLN4, SES1, GUS1, YDR341C, SSM4, ACC1, WRS1, ADE6, ILS1, ASN2, FRS2, CDC60, FRS1, GUA1, UBC9, UBR1, ARG1, GLN1, KRS1	487	120	4885	2.59129	0.000659289	7.32758e-05	0.00171238
UP_SEQ_FEATURE	short sequence motif:"HIGH" region	8	1.51229	0.000398709	Q12109, P36421, P53852, P09436, P26637, P13188, P46655, Q05506	WRS1, TYS1, YNL247W, ILS1, CDC60, GLN4, GUS1, YDR341C	529	17	5872	5.22362	0.358695	0.105117	0.636706
INTERPRO	IPR014729:Rossmann-like alpha/beta/alpha sandwich fold	13	2.45747	0.000482563	P13259, Q12109, P36421, P09436, P53852, P49090, P26637, Q06178, P38625, P22768, P13188, P46655, Q05506	PCT1, WRS1, TYS1, ILS1, YNL247W, ASN2, CDC60, NMA1, GUA1, ARG1, GLN4, GUS1, YDR341C	509	41	5053	3.14768	0.415913	0.10196	0.770129
UP_SEQ_FEATURE	short sequence motif:"KMSKS" region	7	1.32325	0.00126829	Q12109, P36421, P53852, P09436, P26637, P13188, P46655	WRS1, TYS1, YNL247W, ILS1, CDC60, GLN4, GUS1	529	15	5872	5.18009	0.756776	0.182878	2.0122
INTERPRO	IPR001412:Aminoacyl-tRNA synthetase, class I, conserved site	5	0.94518	0.034557	Q12109, P09436, P13188, P46655, Q05506	WRS1, ILS1, GLN4, GUS1, YDR341C	509	13	5053	3.8182	1	0.804539	43.0668
INTERPRO	IPR009080:Aminoacyl-tRNA synthetase, class 1a, anticodon-binding	4	0.756144	0.0709258	P53852, P09436, P26637, Q05506	YNL247W, ILS1, CDC60, YDR341C	509	10	5053	3.97092	1	0.916544	69.2205
KEGG_PATHWAY	sce00970:Aminoacyl-tRNA biosynthesis	16	3.02457	1	Q12109, P36421, P38708, P09436, P53852, P38707, P15625, P26637, P15624, P04802, P04801, P13188, P07284, P46655, P15180, Q05506	WRS1, TYS1, YHR020W, ILS1, YNL247W, DED81, FRS2, CDC60, FRS1, DPS1, THS1, GLN4, SES1, GUS1, KRS1, YDR341C	282	313	2194	0.397707	1	1	100
Annotation Cluster 11	Enrichment Score: 2.8349547051098356
Category	Term	Count	%	PValue	Genes/Uniprot	Gene Names	List Total	Pop Hits	Pop Total	Fold Enrichment	Bonferroni	Benjamini	FDR
GOTERM_BP_DIRECT	GO:0042797~tRNA transcription from RNA polymerase III promoter	10	1.89036	1.08409e-05	P36121, P25441, P28000, P07273, P04051, P40422, P22139, P07703, P20434, P22276	RPC37, RPC53, RPC19, DST1, RPO31, RPC10, RPB10, RPC40, RPB5, RET1	517	18	5557	5.97142	0.010761	0.000831908	0.0171226
UP_KEYWORDS	DNA-directed RNA polymerase	13	2.45747	1.98559e-05	P36121, P25441, P10363, P28000, P04050, P04051, P40422, P20433, P22139, P07703, P20434, P46669, P22276	RPC37, RPC53, PRI1, RPC19, RPO21, RPO31, RPC10, RPB4, RPB10, RPC40, RPB5, RPA43, RET1	529	34	5914	4.27455	0.00497148	0.000262275	0.0258079
GOTERM_CC_DIRECT	GO:0005666~DNA-directed RNA polymerase III complex	9	1.70132	4.67475e-05	P36121, P25441, P28000, P04051, P40422, P22139, P07703, P20434, P22276	RPC37, RPC53, RPC19, RPO31, RPC10, RPB10, RPC40, RPB5, RET1	527	17	5861	5.88782	0.0145258	0.000975012	0.0628545
GOTERM_MF_DIRECT	GO:0003899~DNA-directed RNA polymerase activity	13	2.45747	5.81243e-05	P36121, P25441, P10363, P28000, P04050, P04051, P40422, P20433, P22139, P07703, P20434, P46669, P22276	RPC37, RPC53, PRI1, RPC19, RPO21, RPO31, RPC10, RPB4, RPB10, RPC40, RPB5, RPA43, RET1	487	34	4885	3.83531	0.0322515	0.00272819	0.0850843
GOTERM_MF_DIRECT	GO:0001056~RNA polymerase III activity	9	1.70132	9.78572e-05	P36121, P25441, P28000, P04051, P40422, P22139, P07703, P20434, P22276	RPC37, RPC53, RPC19, RPO31, RPC10, RPB10, RPC40, RPB5, RET1	487	17	4885	5.31042	0.0536986	0.00423671	0.143208
GOTERM_BP_DIRECT	GO:0006386~termination of RNA polymerase III transcription	8	1.51229	0.000310288	P25441, P28000, P04051, P40422, P22139, P07703, P20434, P22276	RPC53, RPC19, RPO31, RPC10, RPB10, RPC40, RPB5, RET1	517	16	5557	5.37427	0.266344	0.0170592	0.488997
GOTERM_BP_DIRECT	GO:0006383~transcription from RNA polymerase III promoter	10	1.89036	0.000353226	P13393, P25441, P28000, P07273, P04051, P40422, P22139, P07703, P20434, P22276	SPT15, RPC53, RPC19, DST1, RPO31, RPC10, RPB10, RPC40, RPB5, RET1	517	26	5557	4.13406	0.297129	0.0183858	0.556488
KEGG_PATHWAY	sce00230:Purine metabolism	25	4.7259	0.000650954	P47143, P21951, P25441, P10363, P38972, P04050, P38689, P04051, P07703, P38625, P22276, P36121, P33401, P04161, P49435, P28000, P50095, P40422, P20433, P22139, Q12265, P20434, P46669, P21524, P32895	ADO1, POL2, RPC53, PRI1, ADE6, RPO21, PRS3, RPO31, RPC40, GUA1, RET1, RPC37, PGM1, ADE8, APT1, RPC19, IMD3, RPC10, RPB4, RPB10, PRS5, RPB5, RPA43, RNR1, PRS1	282	96	2194	2.02608	0.0605981	0.0124245	0.714626
KEGG_PATHWAY	sce03020:RNA polymerase	12	2.26843	0.000719351	P36121, P25441, P28000, P04050, P04051, P40422, P20433, P22139, P07703, P20434, P46669, P22276	RPC37, RPC53, RPC19, RPO21, RPO31, RPC10, RPB4, RPB10, RPC40, RPB5, RPA43, RET1	282	30	2194	3.11206	0.0667503	0.0114477	0.789443
GOTERM_BP_DIRECT	GO:0006385~transcription elongation from RNA polymerase III promoter	9	1.70132	0.000728865	P13393, P25441, P28000, P04051, P40422, P22139, P07703, P20434, P22276	SPT15, RPC53, RPC19, RPO31, RPC10, RPB10, RPC40, RPB5, RET1	517	23	5557	4.20595	0.516968	0.0298646	1.1451
KEGG_PATHWAY	sce00240:Pyrimidine metabolism	19	3.59168	0.00309926	P21951, P25441, P10363, P13298, P04050, P28274, P04051, P07703, P22276, P36121, P03965, P18562, P28000, P40422, P20433, P20434, P22139, P46669, P21524	POL2, RPC53, PRI1, URA5, RPO21, URA7, RPO31, RPC40, RET1, RPC37, CPA2, FUR1, RPC19, RPC10, RPB4, RPB5, RPB10, RPA43, RNR1	282	72	2194	2.05309	0.257692	0.0293595	3.36104
GOTERM_CC_DIRECT	GO:0005665~DNA-directed RNA polymerase II, core complex	6	1.13422	0.00399606	P04050, P40422, P20433, P22139, P20434, P47122	RPO21, RPC10, RPB4, RPB10, RPB5, NPA3	527	13	5861	5.13297	0.714431	0.048895	5.2428
GOTERM_CC_DIRECT	GO:0005736~DNA-directed RNA polymerase I complex	6	1.13422	0.00576362	P28000, P40422, P22139, P07703, P20434, P46669	RPC19, RPC10, RPB10, RPC40, RPB5, RPA43	527	14	5861	4.76633	0.83622	0.0625721	7.47967
GOTERM_MF_DIRECT	GO:0001054~RNA polymerase I activity	6	1.13422	0.00892761	P28000, P40422, P22139, P07703, P20434, P46669	RPC19, RPC10, RPB10, RPC40, RPB5, RPA43	487	14	4885	4.29891	0.99364	0.233713	12.3067
GOTERM_BP_DIRECT	GO:0001172~transcription, RNA-templated	5	0.94518	0.0198707	P04050, P40422, P20433, P22139, P20434	RPO21, RPC10, RPB4, RPB10, RPB5	517	12	5557	4.47856	1	0.379307	27.1692
GOTERM_MF_DIRECT	GO:0003968~RNA-directed RNA polymerase activity	5	0.94518	0.0250391	P04050, P40422, P20433, P22139, P20434	RPO21, RPC10, RPB4, RPB10, RPB5	487	12	4885	4.1795	0.999999	0.423092	31.0194
GOTERM_BP_DIRECT	GO:0006360~transcription from RNA polymerase I promoter	6	1.13422	0.0394349	P28000, P40422, P22139, P07703, P20434, P46669	RPC19, RPC10, RPB10, RPC40, RPB5, RPA43	517	21	5557	3.07101	1	0.537993	47.0338
GOTERM_MF_DIRECT	GO:0001055~RNA polymerase II activity	4	0.756144	0.052125	P04050, P40422, P22139, P20434	RPO21, RPC10, RPB10, RPB5	487	9	4885	4.45813	1	0.588527	54.3396
GOTERM_BP_DIRECT	GO:0006366~transcription from RNA polymerase II promoter	7	1.32325	0.979854	P04050, P38129, P40422, Q05027, P20433, P22139, P20434	RPO21, TAF5, RPC10, TAF9, RPB4, RPB10, RPB5	517	125	5557	0.601919	1	1	100
Annotation Cluster 12	Enrichment Score: 2.6309392602768344
Category	Term	Count	%	PValue	Genes/Uniprot	Gene Names	List Total	Pop Hits	Pop Total	Fold Enrichment	Bonferroni	Benjamini	FDR
GOTERM_CC_DIRECT	GO:0005851~eukaryotic translation initiation factor 2B complex	6	1.13422	3.17854e-05	P32501, P12754, P20459, P09032, P14741, P32502	GCD6, GCD2, SUI2, GCD1, GCN3, GCD7	527	6	5861	11.1214	0.00989966	0.000710389	0.0427411
GOTERM_BP_DIRECT	GO:0019509~L-methionine biosynthetic process from methylthioadenosine	7	1.32325	0.000353363	P53090, P12754, P38891, Q06489, Q07938, P14741, P32502	ARO8, GCD2, BAT1, MRI1, MEU1, GCN3, GCD7	517	12	5557	6.26999	0.297225	0.0174813	0.556705
GOTERM_BP_DIRECT	GO:0044237~cellular metabolic process	6	1.13422	0.000621752	P12754, Q12149, Q06489, P20433, P14741, P32502	GCD2, RRP6, MRI1, RPB4, GCN3, GCD7	517	9	5557	7.1657	0.462433	0.0266261	0.977596
GOTERM_CC_DIRECT	GO:0032045~guanyl-nucleotide exchange factor complex	5	0.94518	0.0018011	P32501, P12754, P09032, P14741, P32502	GCD6, GCD2, GCD1, GCN3, GCD7	527	7	5861	7.94389	0.431216	0.0253218	2.39541
GOTERM_MF_DIRECT	GO:0046523~S-methyl-5-thioribose-1-phosphate isomerase activity	4	0.756144	0.00362638	P12754, Q06489, P14741, P32502	GCD2, MRI1, GCN3, GCD7	487	4	4885	10.0308	0.871136	0.120201	5.18113
INTERPRO	IPR000649:Initiation factor 2B-related	4	0.756144	0.00373968	P12754, Q06489, P14741, P32502	GCD2, MRI1, GCN3, GCD7	509	4	5053	9.92731	0.984606	0.274622	5.82457
GOTERM_MF_DIRECT	GO:0030234~enzyme regulator activity	6	1.13422	0.0508088	P12754, P25605, P0CS90, Q07533, P14741, P32502	GCD2, ILV6, SSC1, CYK3, GCN3, GCD7	487	21	4885	2.86594	1	0.601105	53.4023
GOTERM_MF_DIRECT	GO:0005085~guanyl-nucleotide exchange factor activity	7	1.32325	0.103427	P32501, P12754, P36008, P09032, P14741, P39960, P32502	GCD6, GCD2, TEF4, GCD1, GCN3, BEM2, GCD7	487	33	4885	2.12775	1	0.785485	79.7858
Annotation Cluster 13	Enrichment Score: 2.4885461047194672
Category	Term	Count	%	PValue	Genes/Uniprot	Gene Names	List Total	Pop Hits	Pop Total	Fold Enrichment	Bonferroni	Benjamini	FDR
UP_SEQ_FEATURE	domain:RRM	12	2.26843	8.64057e-05	P53927, Q12159, Q07623, P34217, P34909, P34167, P06103, P38996, P34761, P33399, P53741, Q04067	NOP15, YRA1, NOP6, PIN4, MOT2, TIF3, PRT1, NAB3, WHI3, LHP1, BRE5, TIF35	529	33	5872	4.03643	0.0917723	0.0917723	0.138307
INTERPRO	IPR000504:RNA recognition motif domain	14	2.6465	0.00212163	P34167, P38996, P53741, Q01560, P04147, P53927, Q12159, P34909, P34217, Q07623, P06103, P33399, P34761, Q04067	TIF3, NAB3, BRE5, NPL3, PAB1, NOP15, YRA1, MOT2, PIN4, NOP6, PRT1, LHP1, WHI3, TIF35	509	54	5053	2.57375	0.906145	0.193532	3.34462
INTERPRO	IPR012677:Nucleotide-binding, alpha-beta plait	14	2.6465	0.00989426	P34167, P38996, Q01560, P04147, P53927, P04456, Q12159, P34909, P34217, Q07623, P06103, P33399, P34761, Q04067	TIF3, NAB3, NPL3, PAB1, NOP15, RPL25, YRA1, MOT2, PIN4, NOP6, PRT1, LHP1, WHI3, TIF35	509	64	5053	2.1716	0.999985	0.499585	14.723
SMART	SM00360:RRM	10	1.89036	0.0612662	P53927, Q12159, P34217, P34167, P06103, P38996, P34761, Q04067, P04147, Q01560	NOP15, YRA1, PIN4, TIF3, PRT1, NAB3, WHI3, TIF35, PAB1, NPL3	194	47	1776	1.9478	0.999933	0.909507	53.0798
Annotation Cluster 14	Enrichment Score: 2.180431100480683
Category	Term	Count	%	PValue	Genes/Uniprot	Gene Names	List Total	Pop Hits	Pop Total	Fold Enrichment	Bonferroni	Benjamini	FDR
GOTERM_BP_DIRECT	GO:0009097~isoleucine biosynthetic process	6	1.13422	0.001149	P07342, P00927, P25605, P13663, P38891, P06168	ILV2, ILV1, ILV6, HOM2, BAT1, ILV5	517	10	5557	6.44913	0.682527	0.0431697	1.79958
KEGG_PATHWAY	sce01210:2-Oxocarboxylic acid metabolism	12	2.26843	0.00303734	P10869, P07342, P53090, P25605, P13663, P38891, Q12122, P48570, Q12166, P06168, P21954, P19414	HOM3, ILV2, ARO8, ILV6, HOM2, BAT1, LYS21, LYS20, LEU9, ILV5, IDP1, ACO1	282	35	2194	2.66748	0.253252	0.0358453	3.2949
UP_KEYWORDS	Branched-chain amino acid biosynthesis	6	1.13422	0.00390627	P07342, P00927, P25605, P38891, Q12166, P06168	ILV2, ILV1, ILV6, BAT1, LEU9, ILV5	529	13	5914	5.15981	0.625586	0.0385337	4.96049
GOTERM_BP_DIRECT	GO:0009082~branched-chain amino acid biosynthetic process	6	1.13422	0.00463487	P07342, P00927, P25605, P38891, Q12166, P06168	ILV2, ILV1, ILV6, BAT1, LEU9, ILV5	517	13	5557	4.96087	0.990307	0.124068	7.07534
KEGG_PATHWAY	sce00290:Valine, leucine and isoleucine biosynthesis	6	1.13422	0.0122565	P07342, P00927, P25605, P38891, Q12166, P06168	ILV2, ILV1, ILV6, BAT1, LEU9, ILV5	282	12	2194	3.89007	0.693916	0.0939476	12.7006
GOTERM_BP_DIRECT	GO:0009099~valine biosynthetic process	4	0.756144	0.020962	P07342, P25605, P38891, P06168	ILV2, ILV6, BAT1, ILV5	517	7	5557	6.14203	1	0.381533	28.4397
KEGG_PATHWAY	sce00770:Pantothenate and CoA biosynthesis	6	1.13422	0.0336177	P07342, P25605, P36076, P38891, Q04430, P06168	ILV2, ILV6, CAB3, BAT1, CAB1, ILV5	282	15	2194	3.11206	0.962477	0.19656	31.3831
Annotation Cluster 15	Enrichment Score: 2.1792344050159542
Category	Term	Count	%	PValue	Genes/Uniprot	Gene Names	List Total	Pop Hits	Pop Total	Fold Enrichment	Bonferroni	Benjamini	FDR
GOTERM_MF_DIRECT	GO:0004004~ATP-dependent RNA helicase activity	14	2.6465	5.69861e-05	P53131, P38719, P10081, P53734, P30771, P38712, P38112, P06634, P35207, P20449, P15424, P32892, Q04217, P39517	PRP43, DBP8, TIF1, DBP6, NAM7, RRP3, MAK5, DED1, SKI2, DBP5, MSS116, DRS1, ECM16, DHH1	487	39	4885	3.6008	0.0316301	0.00291765	0.0834189
UP_SEQ_FEATURE	short sequence motif:DEAD box	10	1.89036	0.00013683	P38719, P53734, P10081, P20449, P15424, P32892, P38712, P38112, P39517, P06634	DBP8, DBP6, TIF1, DBP5, MSS116, DRS1, RRP3, MAK5, DHH1, DED1	529	24	5872	4.62508	0.141389	0.0733874	0.218937
UP_SEQ_FEATURE	short sequence motif:Q motif	10	1.89036	0.000277563	P38719, P53734, P10081, P20449, P15424, P32892, P38712, P38112, P39517, P06634	DBP8, DBP6, TIF1, DBP5, MSS116, DRS1, RRP3, MAK5, DHH1, DED1	529	26	5872	4.2693	0.266001	0.0979477	0.443649
GOTERM_BP_DIRECT	GO:0010501~RNA secondary structure unwinding	10	1.89036	0.000486893	P38719, P53734, P10081, P20449, P15424, P32892, P38712, P38112, P39517, P06634	DBP8, DBP6, TIF1, DBP5, MSS116, DRS1, RRP3, MAK5, DHH1, DED1	517	27	5557	3.98094	0.384941	0.0218504	0.766317
INTERPRO	IPR000629:RNA helicase, ATP-dependent, DEAD-box, conserved site	9	1.70132	0.000614279	P53734, P10081, P20449, P15424, P32892, P38712, P38112, P39517, P06634	DBP6, TIF1, DBP5, MSS116, DRS1, RRP3, MAK5, DHH1, DED1	509	21	5053	4.25456	0.495666	0.107819	0.979368
INTERPRO	IPR014014:RNA helicase, DEAD-box type, Q motif	9	1.70132	0.00169157	P38719, P10081, P20449, P15424, P32892, P38712, P38112, P39517, P06634	DBP8, TIF1, DBP5, MSS116, DRS1, RRP3, MAK5, DHH1, DED1	509	24	5053	3.72274	0.848324	0.189056	2.67526
INTERPRO	IPR011545:DNA/RNA helicase, DEAD/DEAH box type, N-terminal	14	2.6465	0.00176908	P53131, P38719, P10081, P53734, P38712, P38112, P47047, P06634, P35207, P20449, P15424, P32892, Q04217, P39517	PRP43, DBP8, TIF1, DBP6, RRP3, MAK5, MTR4, DED1, SKI2, DBP5, MSS116, DRS1, ECM16, DHH1	509	53	5053	2.62231	0.860891	0.179015	2.79621
UP_KEYWORDS	Helicase	17	3.21361	0.0124398	P53131, P38719, P10081, P53734, P30771, P38712, P38112, P47047, P06634, P35207, P29496, Q03940, P20449, P15424, P32892, Q04217, P39517	PRP43, DBP8, TIF1, DBP6, NAM7, RRP3, MAK5, MTR4, DED1, SKI2, MCM5, RVB1, DBP5, MSS116, DRS1, ECM16, DHH1	529	98	5914	1.93932	0.956803	0.0908195	15.0172
UP_SEQ_FEATURE	domain:Helicase C-terminal	14	2.6465	0.0187043	P53131, P38719, P10081, P53734, P38712, P38112, P47047, P06634, P35207, P20449, P15424, P32892, Q04217, P39517	PRP43, DBP8, TIF1, DBP6, RRP3, MAK5, MTR4, DED1, SKI2, DBP5, MSS116, DRS1, ECM16, DHH1	529	77	5872	2.01822	1	0.777411	26.0977
UP_SEQ_FEATURE	domain:Helicase ATP-binding	14	2.6465	0.022793	P53131, P38719, P10081, P53734, P38712, P38112, P47047, P06634, P35207, P20449, P15424, P32892, Q04217, P39517	PRP43, DBP8, TIF1, DBP6, RRP3, MAK5, MTR4, DED1, SKI2, DBP5, MSS116, DRS1, ECM16, DHH1	529	79	5872	1.96712	1	0.779288	30.8783
INTERPRO	IPR027417:P-loop containing nucleoside triphosphate hydrolase	44	8.31758	0.0401312	P53145, P53734, P10081, P32908, P28274, P30771, P38112, P36048, P47047, P06634, P20424, P29496, P16521, P20449, P05453, P25454, P32892, Q04217, P32324, Q07844, Q08972, P39517, P42942, P53131, P38629, P38719, P32835, P40024, P40498, P38712, P34253, P16140, P47122, P33302, P25039, P47037, P35207, P02994, P32481, Q03940, P15424, P39730, P38219, P43535	LSG1, DBP6, TIF1, SMC1, URA7, NAM7, MAK5, SNU114, MTR4, DED1, SRP54, MCM5, YEF3, DBP5, SUP35, RAD51, DRS1, ECM16, EFT1, RIX7, NEW1, DHH1, YGR210C, PRP43, RFC3, DBP8, GSP1, ARB1, UTP25, RRP3, KTI12, VMA2, NPA3, PDR5, MEF1, SMC3, SKI2, TEF1, GCD11, RVB1, MSS116, FUN12, OLA1, GCN20	509	329	5053	1.32766	1	0.827079	48.1096
INTERPRO	IPR014001:Helicase, superfamily 1/2, ATP-binding domain	14	2.6465	0.0416612	P53131, P38719, P10081, P53734, P38712, P38112, P47047, P06634, P35207, P20449, P15424, P32892, Q04217, P39517	PRP43, DBP8, TIF1, DBP6, RRP3, MAK5, MTR4, DED1, SKI2, DBP5, MSS116, DRS1, ECM16, DHH1	509	77	5053	1.80497	1	0.827221	49.4187
INTERPRO	IPR001650:Helicase, C-terminal	14	2.6465	0.0456133	P53131, P38719, P10081, P53734, P38712, P38112, P47047, P06634, P35207, P20449, P15424, P32892, Q04217, P39517	PRP43, DBP8, TIF1, DBP6, RRP3, MAK5, MTR4, DED1, SKI2, DBP5, MSS116, DRS1, ECM16, DHH1	509	78	5053	1.78182	1	0.833607	52.6582
SMART	SM00490:HELICc	14	2.6465	0.0668909	P53131, P38719, P10081, P53734, P38712, P38112, P47047, P06634, P35207, P20449, P15424, P32892, Q04217, P39517	PRP43, DBP8, TIF1, DBP6, RRP3, MAK5, MTR4, DED1, SKI2, DBP5, MSS116, DRS1, ECM16, DHH1	194	77	1776	1.66448	0.999973	0.878116	56.3363
SMART	SM00487:DEXDc	14	2.6465	0.0668909	P53131, P38719, P10081, P53734, P38712, P38112, P47047, P06634, P35207, P20449, P15424, P32892, Q04217, P39517	PRP43, DBP8, TIF1, DBP6, RRP3, MAK5, MTR4, DED1, SKI2, DBP5, MSS116, DRS1, ECM16, DHH1	194	77	1776	1.66448	0.999973	0.878116	56.3363
GOTERM_MF_DIRECT	GO:0004386~helicase activity	16	3.02457	0.0680447	P53131, P38719, P53734, P30771, P38712, P38112, P47047, P06634, P35207, P29496, Q03940, P20449, P15424, P32892, Q04217, P39517	PRP43, DBP8, DBP6, NAM7, RRP3, MAK5, MTR4, DED1, SKI2, MCM5, RVB1, DBP5, MSS116, DRS1, ECM16, DHH1	487	100	4885	1.60493	1	0.678765	64.3699
GOTERM_MF_DIRECT	GO:0008186~RNA-dependent ATPase activity	3	0.567108	0.376246	P10081, P20449, P38712	TIF1, DBP5, RRP3	487	13	4885	2.3148	1	0.99138	99.9004
Annotation Cluster 16	Enrichment Score: 2.1174837379992133
Category	Term	Count	%	PValue	Genes/Uniprot	Gene Names	List Total	Pop Hits	Pop Total	Fold Enrichment	Bonferroni	Benjamini	FDR
UP_KEYWORDS	mRNA transport	15	2.83554	0.00145918	P40069, P49687, P33755, P40064, P52593, P20676, P04147, P40368, P20449, Q04175, P38181, P43586, Q12445, Q08972, P39517	KAP123, NUP145, NPL4, NUP157, NUP188, NUP1, PAB1, NUP82, DBP5, SXM1, NUP170, LOC1, POM34, NEW1, DHH1	529	65	5914	2.5799	0.306858	0.0158094	1.88028
GOTERM_BP_DIRECT	GO:0051028~mRNA transport	15	2.83554	0.00211496	P40069, P49687, P33755, P40064, P52593, P20676, P04147, P40368, P20449, Q04175, P38181, P43586, Q12445, Q08972, P39517	KAP123, NUP145, NPL4, NUP157, NUP188, NUP1, PAB1, NUP82, DBP5, SXM1, NUP170, LOC1, POM34, NEW1, DHH1	517	65	5557	2.48043	0.879121	0.0680091	3.28896
GOTERM_BP_DIRECT	GO:0006606~protein import into nucleus	11	2.0794	0.00501359	P40069, Q00955, P49687, P32835, P40064, Q04175, P52593, P38181, P20676, P40368, Q12445	KAP123, ACC1, NUP145, GSP1, NUP157, SXM1, NUP188, NUP170, NUP1, NUP82, POM34	517	43	5557	2.74963	0.99337	0.130066	7.63225
GOTERM_CC_DIRECT	GO:0031965~nuclear membrane	15	2.83554	0.00541223	P40069, P49687, P53903, P33755, P40064, P52593, P06105, P47069, P20676, P40368, Q03455, P20449, P20484, P38181, Q12445	KAP123, NUP145, PGA2, NPL4, NUP157, NUP188, SCP160, MPS3, NUP1, NUP82, MSC2, DBP5, MAK11, NUP170, POM34	527	74	5861	2.25435	0.817066	0.0609741	7.03891
UP_KEYWORDS	Nuclear pore complex	10	1.89036	0.00880093	P40069, P49687, P20449, P40064, Q04175, P52593, P38181, P20676, P40368, Q12445	KAP123, NUP145, DBP5, NUP157, SXM1, NUP188, NUP170, NUP1, NUP82, POM34	529	41	5914	2.72673	0.891262	0.0761849	10.8554
UP_KEYWORDS	Translocation	14	2.6465	0.010301	P40069, P49687, P33755, P20449, P40064, Q04175, P52593, P38181, O74700, P87108, P20676, P32897, P40368, Q12445	KAP123, NUP145, NPL4, DBP5, NUP157, SXM1, NUP188, NUP170, TIM9, TIM10, NUP1, TIM23, NUP82, POM34	529	72	5914	2.17381	0.925649	0.0829854	12.5933
GOTERM_MF_DIRECT	GO:0017056~structural constituent of nuclear pore	7	1.32325	0.0385796	P49687, P40064, P52593, P38181, P20676, P40368, Q12445	NUP145, NUP157, NUP188, NUP170, NUP1, NUP82, POM34	487	26	4885	2.7006	1	0.522723	43.7943
GOTERM_CC_DIRECT	GO:0005643~nuclear pore	11	2.0794	0.0392129	P34232, P40069, P49687, P20449, P40064, Q04175, P52593, P38181, P20676, P40368, Q12445	MTR2, KAP123, NUP145, DBP5, NUP157, SXM1, NUP188, NUP170, NUP1, NUP82, POM34	527	60	5861	2.03893	0.999996	0.323805	41.6091
Annotation Cluster 17	Enrichment Score: 2.0650066647636582
Category	Term	Count	%	PValue	Genes/Uniprot	Gene Names	List Total	Pop Hits	Pop Total	Fold Enrichment	Bonferroni	Benjamini	FDR
UP_KEYWORDS	Aromatic amino acid biosynthesis	6	1.13422	0.00259203	P28777, P07285, P32178, P14843, P00899, P32449	ARO2, TRP4, ARO7, ARO3, TRP2, ARO4	529	12	5914	5.58979	0.478708	0.0267785	3.31751
GOTERM_BP_DIRECT	GO:0009073~aromatic amino acid family biosynthetic process	6	1.13422	0.00308496	P28777, P07285, P32178, P14843, P00899, P32449	ARO2, TRP4, ARO7, ARO3, TRP2, ARO4	517	12	5557	5.37427	0.954203	0.0918638	4.76325
KEGG_PATHWAY	sce00400:Phenylalanine, tyrosine and tryptophan biosynthesis	7	1.32325	0.0151061	P53090, P28777, P07285, P32178, P14843, P00899, P32449	ARO8, ARO2, TRP4, ARO7, ARO3, TRP2, ARO4	282	17	2194	3.20359	0.768053	0.106316	15.4348
GOTERM_BP_DIRECT	GO:0009423~chorismate biosynthetic process	3	0.567108	0.0454917	P28777, P14843, P32449	ARO2, ARO3, ARO4	517	4	5557	8.06141	1	0.583852	52.0701
Annotation Cluster 18	Enrichment Score: 1.7643241172736515
Category	Term	Count	%	PValue	Genes/Uniprot	Gene Names	List Total	Pop Hits	Pop Total	Fold Enrichment	Bonferroni	Benjamini	FDR
INTERPRO	IPR004161:Translation elongation factor EFTu/EF1A, domain 2	7	1.32325	0.000927846	P02994, P32481, P05453, P39730, P32324, P36048, P25039	TEF1, GCD11, SUP35, FUN12, EFT1, SNU114, MEF1	509	13	5053	5.34547	0.644454	0.137335	1.47583
INTERPRO	IPR000795:Elongation factor, GTP-binding domain	7	1.32325	0.00332831	P02994, P32481, P05453, P39730, P32324, P36048, P25039	TEF1, GCD11, SUP35, FUN12, EFT1, SNU114, MEF1	509	16	5053	4.3432	0.975618	0.266182	5.1998
INTERPRO	IPR009000:Translation elongation/initiation factor/Ribosomal, beta-barrel	8	1.51229	0.00442652	P02994, P32481, P31334, P05453, P39730, P32324, P36048, P25039	TEF1, GCD11, MRPL9, SUP35, FUN12, EFT1, SNU114, MEF1	509	22	5053	3.60993	0.99286	0.297427	6.85913
UP_KEYWORDS	GTP-binding	15	2.83554	0.0445913	P42942, P53145, P32835, P36048, P51601, P47122, P38431, P25039, P20424, P18562, P02994, P32481, P05453, P39730, P32324	YGR210C, LSG1, GSP1, SNU114, FOL2, NPA3, TIF5, MEF1, SRP54, FUR1, TEF1, GCD11, SUP35, FUN12, EFT1	529	96	5914	1.74681	0.999989	0.260149	44.7316
GOTERM_MF_DIRECT	GO:0005525~GTP binding	17	3.21361	0.0465421	P42942, Q07381, P53145, P32835, P36048, P51601, P47122, P38431, P25039, P20424, P18562, P02994, P32481, P05453, P39730, P32324, P38219	YGR210C, TSR1, LSG1, GSP1, SNU114, FOL2, NPA3, TIF5, MEF1, SRP54, FUR1, TEF1, GCD11, SUP35, FUN12, EFT1, OLA1	487	103	4885	1.65557	1	0.579834	50.2391
UP_SEQ_FEATURE	nucleotide phosphate-binding region:GTP	13	2.45747	0.0939158	P42942, P53145, P32835, P36048, P38431, P25039, P20424, P32481, P02994, P05453, P39730, P32324, P38219	YGR210C, LSG1, GSP1, SNU114, TIF5, MEF1, SRP54, GCD11, TEF1, SUP35, FUN12, EFT1, OLA1	529	88	5872	1.6398	1	0.960496	79.3953
GOTERM_MF_DIRECT	GO:0003924~GTPase activity	12	2.26843	0.167546	P20424, Q07381, P53145, P02994, P32481, P32835, P05453, P39730, P32324, P36048, P47122, P25039	SRP54, TSR1, LSG1, TEF1, GCD11, GSP1, SUP35, FUN12, EFT1, SNU114, NPA3, MEF1	487	80	4885	1.50462	1	0.894428	93.1806
Annotation Cluster 19	Enrichment Score: 1.7302255159789266
Category	Term	Count	%	PValue	Genes/Uniprot	Gene Names	List Total	Pop Hits	Pop Total	Fold Enrichment	Bonferroni	Benjamini	FDR
UP_KEYWORDS	Threonine biosynthesis	4	0.756144	0.0115253	P10869, P13663, P16120, P17423	HOM3, HOM2, THR4, THR1	529	6	5914	7.45306	0.945506	0.0869156	13.9885
GOTERM_BP_DIRECT	GO:0009088~threonine biosynthetic process	4	0.756144	0.0128558	P10869, P13663, P16120, P17423	HOM3, HOM2, THR4, THR1	517	6	5557	7.1657	0.999998	0.275904	18.4849
KEGG_PATHWAY	sce00260:Glycine, serine and threonine metabolism	9	1.70132	0.0435082	P10869, P42941, P00927, P13663, P37292, P36136, P32582, P16120, P17423	HOM3, SER2, ILV1, HOM2, SHM1, SHB17, CYS4, THR4, THR1	282	32	2194	2.18816	0.986023	0.234249	38.7334
Annotation Cluster 20	Enrichment Score: 1.6210869942438815
Category	Term	Count	%	PValue	Genes/Uniprot	Gene Names	List Total	Pop Hits	Pop Total	Fold Enrichment	Bonferroni	Benjamini	FDR
GOTERM_BP_DIRECT	GO:0006555~methionine metabolic process	5	0.94518	0.00204744	P39954, P53128, P10659, P17423, P19358	SAH1, MET13, SAM1, THR1, SAM2	517	7	5557	7.67754	0.870677	0.0681025	3.18555
GOTERM_BP_DIRECT	GO:0006730~one-carbon metabolic process	5	0.94518	0.0789206	P39954, P37292, P53128, P10659, P19358	SAH1, SHM1, MET13, SAM1, SAM2	517	18	5557	2.98571	1	0.733745	72.7072
UP_KEYWORDS	One-carbon metabolism	4	0.756144	0.0847885	P39954, P37292, P10659, P19358	SAH1, SHM1, SAM1, SAM2	529	12	5914	3.72653	1	0.376971	68.3908
Annotation Cluster 21	Enrichment Score: 1.5413875536433237
Category	Term	Count	%	PValue	Genes/Uniprot	Gene Names	List Total	Pop Hits	Pop Total	Fold Enrichment	Bonferroni	Benjamini	FDR
UP_SEQ_FEATURE	domain:PUA	4	0.756144	0.0117566	P33322, P32264, Q04600, Q08962	CBF5, PRO1, TMA64, NIP7	529	6	5872	7.40013	0.999998	0.768652	17.2563
INTERPRO	IPR002478:Pseudouridine synthase/archaeosine transglycosylase	4	0.756144	0.0160194	P33322, P32264, Q04600, Q08962	CBF5, PRO1, TMA64, NIP7	509	6	5053	6.61821	1	0.593228	22.7915
INTERPRO	IPR015947:PUA-like domain	4	0.756144	0.0384956	P33322, P32264, Q04600, Q08962	CBF5, PRO1, TMA64, NIP7	509	8	5053	4.96365	1	0.826096	46.6751
SMART	SM00359:PUA	3	0.567108	0.094213	P33322, P32264, Q08962	CBF5, PRO1, NIP7	194	5	1776	5.49278	1	0.918468	69.4054
Annotation Cluster 22	Enrichment Score: 1.5014535387888204
Category	Term	Count	%	PValue	Genes/Uniprot	Gene Names	List Total	Pop Hits	Pop Total	Fold Enrichment	Bonferroni	Benjamini	FDR
GOTERM_CC_DIRECT	GO:0031415~NatA complex	4	0.756144	0.00268376	Q12387, P07347, Q08689, P12945	MDM20, ARD1, NAT5, NAT1	527	4	5861	11.1214	0.568784	0.0359109	3.54982
GOTERM_MF_DIRECT	GO:0004596~peptide alpha-N-acetyltransferase activity	4	0.756144	0.0882561	Q12387, P07347, Q08689, P12945	MDM20, ARD1, NAT5, NAT1	487	11	4885	3.64756	1	0.746237	74.1553
GOTERM_BP_DIRECT	GO:0006474~N-terminal protein amino acid acetylation	3	0.567108	0.132175	P07347, Q08689, P12945	ARD1, NAT5, NAT1	517	7	5557	4.60652	1	0.871325	89.3465
Annotation Cluster 23	Enrichment Score: 1.4145159782199574
Category	Term	Count	%	PValue	Genes/Uniprot	Gene Names	List Total	Pop Hits	Pop Total	Fold Enrichment	Bonferroni	Benjamini	FDR
KEGG_PATHWAY	sce00300:Lysine biosynthesis	6	1.13422	0.0122565	P10869, P53090, P13663, Q12122, P07702, P48570	HOM3, ARO8, HOM2, LYS21, LYS2, LYS20	282	12	2194	3.89007	0.693916	0.0939476	12.7006
UP_KEYWORDS	Lysine biosynthesis	4	0.756144	0.0528093	P13663, Q12122, P07702, P48570	HOM2, LYS21, LYS2, LYS20	529	10	5914	4.47183	0.999999	0.288549	50.6022
GOTERM_BP_DIRECT	GO:0019878~lysine biosynthetic process via aminoadipic acid	4	0.756144	0.0582679	P53090, Q12122, P07702, P48570	ARO8, LYS21, LYS2, LYS20	517	10	5557	4.29942	1	0.650457	61.2595
GOTERM_BP_DIRECT	GO:0009085~lysine biosynthetic process	4	0.756144	0.0582679	P13663, Q12122, P07702, P48570	HOM2, LYS21, LYS2, LYS20	517	10	5557	4.29942	1	0.650457	61.2595
Annotation Cluster 24	Enrichment Score: 1.4122836172886895
Category	Term	Count	%	PValue	Genes/Uniprot	Gene Names	List Total	Pop Hits	Pop Total	Fold Enrichment	Bonferroni	Benjamini	FDR
INTERPRO	IPR004161:Translation elongation factor EFTu/EF1A, domain 2	7	1.32325	0.000927846	P02994, P32481, P05453, P39730, P32324, P36048, P25039	TEF1, GCD11, SUP35, FUN12, EFT1, SNU114, MEF1	509	13	5053	5.34547	0.644454	0.137335	1.47583
INTERPRO	IPR000795:Elongation factor, GTP-binding domain	7	1.32325	0.00332831	P02994, P32481, P05453, P39730, P32324, P36048, P25039	TEF1, GCD11, SUP35, FUN12, EFT1, SNU114, MEF1	509	16	5053	4.3432	0.975618	0.266182	5.1998
INTERPRO	IPR009000:Translation elongation/initiation factor/Ribosomal, beta-barrel	8	1.51229	0.00442652	P02994, P32481, P31334, P05453, P39730, P32324, P36048, P25039	TEF1, GCD11, MRPL9, SUP35, FUN12, EFT1, SNU114, MEF1	509	22	5053	3.60993	0.99286	0.297427	6.85913
INTERPRO	IPR020568:Ribosomal protein S5 domain 2-type fold	9	1.70132	0.014228	P53256, P15108, Q12277, P25443, P32324, P06786, P17423, P36048, P25039	RRP46, HSC82, RRP42, RPS2, EFT1, TOP2, THR1, SNU114, MEF1	509	33	5053	2.70745	1	0.568378	20.5091
INTERPRO	IPR005517:Translation elongation factor EFG/EF2, domain IV	3	0.567108	0.052753	P32324, P36048, P25039	EFT1, SNU114, MEF1	509	4	5053	7.44548	1	0.86634	58.023
SMART	SM00889:SM00889	3	0.567108	0.0608112	P32324, P36048, P25039	EFT1, SNU114, MEF1	194	4	1776	6.86598	0.999928	0.958363	52.8068
INTERPRO	IPR014721:Ribosomal protein S5 domain 2-type fold, subgroup	6	1.13422	0.0628977	P25443, P32324, P06786, P17423, P36048, P25039	RPS2, EFT1, TOP2, THR1, SNU114, MEF1	509	22	5053	2.70745	1	0.895808	64.6727
INTERPRO	IPR009001:Translation elongation factor EF1A/initiation factor IF2gamma, C-terminal	3	0.567108	0.115221	P02994, P32481, P05453	TEF1, GCD11, SUP35	509	6	5053	4.96365	1	0.96407	85.9249
SMART	SM00838:SM00838	3	0.567108	0.131462	P32324, P36048, P25039	EFT1, SNU114, MEF1	194	6	1776	4.57732	1	0.953136	81.492
INTERPRO	IPR000640:Translation elongation factor EFG, V domain	3	0.567108	0.150923	P32324, P36048, P25039	EFT1, SNU114, MEF1	509	7	5053	4.25456	1	0.984112	92.7232
INTERPRO	IPR009022:Elongation factor G, III-V domain	3	0.567108	0.150923	P32324, P36048, P25039	EFT1, SNU114, MEF1	509	7	5053	4.25456	1	0.984112	92.7232
INTERPRO	IPR005225:Small GTP-binding protein domain	4	0.756144	0.833638	P32835, P39730, P32324, P25039	GSP1, FUN12, EFT1, MEF1	509	44	5053	0.902483	1	1	100
Annotation Cluster 25	Enrichment Score: 1.382352797142929
Category	Term	Count	%	PValue	Genes/Uniprot	Gene Names	List Total	Pop Hits	Pop Total	Fold Enrichment	Bonferroni	Benjamini	FDR
GOTERM_BP_DIRECT	GO:0009116~nucleoside metabolic process	8	1.51229	0.000310288	P18562, P13298, P47165, P49435, P38689, Q07938, Q12265, P32895	FUR1, URA5, XPT1, APT1, PRS3, MEU1, PRS5, PRS1	517	16	5557	5.37427	0.266344	0.0170592	0.488997
INTERPRO	IPR000836:Phosphoribosyltransferase domain	7	1.32325	0.00148712	P18562, P13298, P47165, P49435, P38689, Q12265, P32895	FUR1, URA5, XPT1, APT1, PRS3, PRS5, PRS1	509	14	5053	4.96365	0.809458	0.187172	2.35551
GOTERM_BP_DIRECT	GO:0009156~ribonucleoside monophosphate biosynthetic process	4	0.756144	0.0128558	P38972, P38689, Q12265, P32895	ADE6, PRS3, PRS5, PRS1	517	6	5557	7.1657	0.999998	0.275904	18.4849
GOTERM_BP_DIRECT	GO:0044249~cellular biosynthetic process	4	0.756144	0.0128558	P38689, Q06489, Q12265, P32895	PRS3, MRI1, PRS5, PRS1	517	6	5557	7.1657	0.999998	0.275904	18.4849
UP_SEQ_FEATURE	metal ion-binding site:Magnesium	9	1.70132	0.0448385	P07342, P33401, P38689, P15496, Q12265, P11491, P10659, P19358, P32895	ILV2, PGM1, PRS3, IDI1, PRS5, PHO8, SAM1, SAM2, PRS1	529	45	5872	2.22004	1	0.902014	52.0389
GOTERM_CC_DIRECT	GO:0002189~ribose phosphate diphosphokinase complex	3	0.567108	0.0669619	P38689, Q12265, P32895	PRS3, PRS5, PRS1	527	5	5861	6.67287	1	0.452617	60.6302
GOTERM_BP_DIRECT	GO:0006015~5-phosphoribose 1-diphosphate biosynthetic process	3	0.567108	0.0712187	P38689, Q12265, P32895	PRS3, PRS5, PRS1	517	5	5557	6.44913	1	0.707387	68.8706
GOTERM_MF_DIRECT	GO:0004749~ribose phosphate diphosphokinase activity	3	0.567108	0.0806255	P38689, Q12265, P32895	PRS3, PRS5, PRS1	487	5	4885	6.01848	1	0.722344	70.8003
INTERPRO	IPR000842:Phosphoribosyl pyrophosphate synthetase, conserved site	3	0.567108	0.0821538	P38689, Q12265, P32895	PRS3, PRS5, PRS1	509	5	5053	5.95639	1	0.939721	74.6672
INTERPRO	IPR005946:Ribose-phosphate diphosphokinase	3	0.567108	0.0821538	P38689, Q12265, P32895	PRS3, PRS5, PRS1	509	5	5053	5.95639	1	0.939721	74.6672
KEGG_PATHWAY	sce00030:Pentose phosphate pathway	7	1.32325	0.138806	P33401, P38689, P14540, P38720, Q12265, P23254, P32895	PGM1, PRS3, FBA1, GND1, PRS5, TKL1, PRS1	282	28	2194	1.94504	0.999999	0.569958	80.7157
UP_KEYWORDS	Nucleotide biosynthesis	3	0.567108	0.155531	P38689, Q12265, P32895	PRS3, PRS5, PRS1	529	8	5914	4.19234	1	0.544225	88.8915
GOTERM_BP_DIRECT	GO:0009165~nucleotide biosynthetic process	3	0.567108	0.236303	P38689, Q12265, P32895	PRS3, PRS5, PRS1	517	10	5557	3.22456	1	0.96241	98.5853
GOTERM_BP_DIRECT	GO:0031505~fungal-type cell wall organization	8	1.51229	0.980078	P38689, P42842, P32623, Q12265, Q03655, P32486, P38248, P32895	PRS3, EMW1, UTR2, PRS5, GAS3, KRE6, ECM33, PRS1	517	140	5557	0.614203	1	1	100
Annotation Cluster 26	Enrichment Score: 1.3056045808072794
Category	Term	Count	%	PValue	Genes/Uniprot	Gene Names	List Total	Pop Hits	Pop Total	Fold Enrichment	Bonferroni	Benjamini	FDR
UP_KEYWORDS	Elongation factor	6	1.13422	0.00563636	P36008, P16521, P02994, P23301, P32324, P25039	TEF4, YEF3, TEF1, HYP2, EFT1, MEF1	529	14	5914	4.79125	0.757978	0.0531044	7.08406
GOTERM_MF_DIRECT	GO:0003746~translation elongation factor activity	6	1.13422	0.0214876	P36008, P16521, P02994, P23301, P32324, P25039	TEF4, YEF3, TEF1, HYP2, EFT1, MEF1	487	17	4885	3.54028	0.999995	0.387401	27.2468
GOTERM_BP_DIRECT	GO:0006414~translational elongation	6	1.13422	1	P36008, P16521, P02994, P23301, P32324, P25039	TEF4, YEF3, TEF1, HYP2, EFT1, MEF1	517	293	5557	0.220107	1	1	100
Annotation Cluster 27	Enrichment Score: 1.1827590012013103
Category	Term	Count	%	PValue	Genes/Uniprot	Gene Names	List Total	Pop Hits	Pop Total	Fold Enrichment	Bonferroni	Benjamini	FDR
INTERPRO	IPR006195:Aminoacyl-tRNA synthetase, class II	7	1.32325	0.0047137	P38708, P04802, P04801, P38707, P15625, P07284, P15180	YHR020W, DPS1, THS1, DED81, FRS2, SES1, KRS1	509	17	5053	4.08772	0.994823	0.295945	7.28854
INTERPRO	IPR012340:Nucleic acid-binding, OB-fold	9	1.70132	0.103443	P29496, P46672, P04802, P38912, P23301, P38707, P20459, P15180, P0CX46	MCM5, ARC1, DPS1, TIF11, HYP2, DED81, SUI2, KRS1, RPL2B	509	48	5053	1.86137	1	0.959282	82.6044
INTERPRO	IPR018150:Aminoacyl-tRNA synthetase, class II (D/K/N)-like	3	0.567108	0.115221	P04802, P38707, P15180	DPS1, DED81, KRS1	509	6	5053	4.96365	1	0.96407	85.9249
INTERPRO	IPR004364:Aminoacyl-tRNA synthetase, class II (D/K/N)	3	0.567108	0.115221	P04802, P38707, P15180	DPS1, DED81, KRS1	509	6	5053	4.96365	1	0.96407	85.9249
INTERPRO	IPR004365:Nucleic acid binding, OB-fold, tRNA/helicase-type	3	0.567108	0.188399	P04802, P38707, P15180	DPS1, DED81, KRS1	509	8	5053	3.72274	1	0.994302	96.4687
Annotation Cluster 28	Enrichment Score: 1.1445360111156089
Category	Term	Count	%	PValue	Genes/Uniprot	Gene Names	List Total	Pop Hits	Pop Total	Fold Enrichment	Bonferroni	Benjamini	FDR
SMART	SM00028:TPR	7	1.32325	0.0316392	P53043, P47103, P15705, P42842, P12945, P33313, Q12118	PPT1, CPR7, STI1, EMW1, NAT1, CNS1, SGT2	194	23	1776	2.78619	0.992455	0.992455	31.9421
INTERPRO	IPR019734:Tetratricopeptide repeat	7	1.32325	0.0337994	P53043, P47103, P15705, P42842, P12945, P33313, Q12118	PPT1, CPR7, STI1, EMW1, NAT1, CNS1, SGT2	509	25	5053	2.77965	1	0.81088	42.3469
UP_SEQ_FEATURE	repeat:TPR 2	7	1.32325	0.0350285	P53043, P47103, P15705, P42842, P12945, P33313, Q12118	PPT1, CPR7, STI1, EMW1, NAT1, CNS1, SGT2	529	28	5872	2.77505	1	0.862768	43.5105
UP_SEQ_FEATURE	repeat:TPR 1	7	1.32325	0.0350285	P53043, P47103, P15705, P42842, P12945, P33313, Q12118	PPT1, CPR7, STI1, EMW1, NAT1, CNS1, SGT2	529	28	5872	2.77505	1	0.862768	43.5105
INTERPRO	IPR001440:Tetratricopeptide TPR-1	4	0.756144	0.0535305	P47103, P15705, P33313, Q12118	CPR7, STI1, CNS1, SGT2	509	9	5053	4.41214	1	0.861522	58.5716
UP_SEQ_FEATURE	repeat:TPR 3	6	1.13422	0.0585265	P53043, P47103, P15705, P12945, P33313, Q12118	PPT1, CPR7, STI1, NAT1, CNS1, SGT2	529	24	5872	2.77505	1	0.924529	61.9387
UP_KEYWORDS	TPR repeat	7	1.32325	0.0605211	P53043, P47103, P15705, P42842, P12945, P33313, Q12118	PPT1, CPR7, STI1, EMW1, NAT1, CNS1, SGT2	529	32	5914	2.44553	1	0.311399	55.5824
INTERPRO	IPR013026:Tetratricopeptide repeat-containing domain	6	1.13422	0.113231	P53043, P47103, P15705, P42842, P33313, Q12118	PPT1, CPR7, STI1, EMW1, CNS1, SGT2	509	26	5053	2.29092	1	0.964801	85.4091
INTERPRO	IPR011990:Tetratricopeptide-like helical	9	1.70132	0.296998	P53043, P47103, P15705, P25298, P42842, Q08421, P12945, P33313, Q12118	PPT1, CPR7, STI1, RNA14, EMW1, ETT1, NAT1, CNS1, SGT2	509	63	5053	1.41819	1	0.999474	99.6463
UP_SEQ_FEATURE	repeat:TPR 4	3	0.567108	0.428631	P15705, P12945, Q12118	STI1, NAT1, SGT2	529	16	5872	2.08129	1	0.999979	99.9872
Annotation Cluster 29	Enrichment Score: 1.112498808589512
Category	Term	Count	%	PValue	Genes/Uniprot	Gene Names	List Total	Pop Hits	Pop Total	Fold Enrichment	Bonferroni	Benjamini	FDR
UP_KEYWORDS	Metal-binding	84	15.879	0.0129117	P38781, Q99258, P06786, P40202, P06168, P32771, P03965, P51402, P54781, P14540, P07143, P53686, P35197, P37898, P38682, P11491, P42941, Q00955, P10363, P32914, P10614, Q03640, P38689, P47100, P10659, P23254, P19812, P33401, P15496, P19097, P07273, Q08985, P19414, P38219, Q05580, P38821, Q03862, P53852, P10507, P40986, P30771, P40032, P26793, P19358, P00899, P22276, P53303, P53043, P04037, P49435,…	RSC30, RIB3, TOP2, CCS1, ILV5, SFA1, CPA2, RPL37B, ERG5, FBA1, CYT1, HST2, GCS1, AAP1, GLO3, PHO8, SER2, ACC1, PRI1, SPT4, ERG11, TCB3, PRS3, TY1B-JR2, SAM1, TKL1, UBR1, PGM1, IDI1, FAS2, DST1, SAM4, ACO1, OLA1, YDR266C, APE4, ARX1, YNL247W, MAS1, CDC1, NAM7, TPA1, RAD27, SAM2, TRP2, RET1, ZPR1, PPT1, COX4, APT1, RPS31, DUG2, TIM9, RPS29A, RPS29B, PRS5, GRX5, CAR1, FRE1, PRS1, BNA1, ILV2, SSM4, T…	529	739	5914	1.27075	0.961686	0.0914811	15.5435
GOTERM_MF_DIRECT	GO:0046872~metal ion binding	86	16.2571	0.132409	P38781, Q99258, P06786, P40202, P06168, P32771, P03965, P51402, P54781, P14540, P07143, P53686, P35197, P37898, P38682, P11491, P42941, Q00955, P10363, P32914, P10614, Q03640, P38689, P47100, P10659, P23254, P19812, P33401, P15496, P19097, P07273, Q08985, P19414, P38219, Q05580, P38821, Q03862, P53852, P32528, P10507, P40986, P30771, P40032, P26793, P19358, P00899, P22276, P53303, P53043, P04037,…	RSC30, RIB3, TOP2, CCS1, ILV5, SFA1, CPA2, RPL37B, ERG5, FBA1, CYT1, HST2, GCS1, AAP1, GLO3, PHO8, SER2, ACC1, PRI1, SPT4, ERG11, TCB3, PRS3, TY1B-JR2, SAM1, TKL1, UBR1, PGM1, IDI1, FAS2, DST1, SAM4, ACO1, OLA1, YDR266C, APE4, ARX1, YNL247W, DUR1,2, MAS1, CDC1, NAM7, TPA1, RAD27, SAM2, TRP2, RET1, ZPR1, PPT1, COX4, HSP10, APT1, RPS31, DUG2, TIM9, RPS29A, RPS29B, PRS5, GRX5, CAR1, FRE1, PRS1, BNA1…	487	764	4885	1.12912	1	0.838075	87.5066
UP_KEYWORDS	Zinc	47	8.88469	0.268908	P38781, Q05580, P38821, P53852, P10507, P30771, Q12211, P40202, P22276, P53303, P32771, P04037, Q03455, P51402, P05759, O74700, P14540, P38149, P41057, P41058, P53686, P35197, P37898, P11491, P38682, P40318, Q12000, P21951, P10363, P32914, P25303, P04050, P04051, P47100, P87108, P25491, P51601, P19812, P49166, P34909, P40529, P05694, P07273, P40422, Q08985, P22139, P38237	RSC30, YDR266C, APE4, YNL247W, MAS1, NAM7, PUS1, CCS1, RET1, ZPR1, SFA1, COX4, MSC2, RPL37B, RPS31, TIM9, FBA1, DUG2, RPS29A, RPS29B, HST2, GCS1, AAP1, PHO8, GLO3, SSM4, TMA46, POL2, PRI1, SPT4, SCJ1, RPO21, RPO31, TY1B-JR2, TIM10, YDJ1, FOL2, UBR1, RPL37A, MOT2, AGE2, MET6, DST1, RPC10, SAM4, RPB10, UBP14	529	469	5914	1.12034	1	0.7244	98.2949
Annotation Cluster 30	Enrichment Score: 1.090479434313292
Category	Term	Count	%	PValue	Genes/Uniprot	Gene Names	List Total	Pop Hits	Pop Total	Fold Enrichment	Bonferroni	Benjamini	FDR
UP_SEQ_FEATURE	repeat:WD 6	13	2.45747	0.0134195	P35184, P21304, Q05946, Q12038, P38873, Q12024, P25382, P20484, P06103, P38129, P38149, Q06679, P38968	SQT1, PWP1, UTP13, SRO7, KOG1, YTM1, RSA4, MAK11, PRT1, TAF5, DUG2, UTP4, SEC31	529	66	5872	2.1864	1	0.777994	19.4583
UP_SEQ_FEATURE	repeat:WD 5	15	2.83554	0.0136545	P35184, P21304, Q05946, Q12038, Q12024, P40217, P38873, P25382, P06103, P20484, P38129, P38149, P48234, Q06679, P38968	SQT1, PWP1, UTP13, SRO7, YTM1, TIF34, KOG1, RSA4, PRT1, MAK11, TAF5, DUG2, ENP2, UTP4, SEC31	529	82	5872	2.03052	1	0.75151	19.7651
UP_SEQ_FEATURE	repeat:WD 4	16	3.02457	0.0196696	P35184, P21304, Q05946, Q12038, Q12024, P40217, P38873, P25382, P06103, P20484, P38129, P38149, P48234, P53235, Q06679, P38968	SQT1, PWP1, UTP13, SRO7, YTM1, TIF34, KOG1, RSA4, PRT1, MAK11, TAF5, DUG2, ENP2, YGR054W, UTP4, SEC31	529	94	5872	1.88939	1	0.771302	27.2534
UP_SEQ_FEATURE	repeat:WD 3	16	3.02457	0.0326218	P35184, P21304, Q05946, Q12038, Q12024, P40217, P38873, P25382, P06103, P20484, P38129, P38149, P48234, P53235, Q06679, P38968	SQT1, PWP1, UTP13, SRO7, YTM1, TIF34, KOG1, RSA4, PRT1, MAK11, TAF5, DUG2, ENP2, YGR054W, UTP4, SEC31	529	100	5872	1.77603	1	0.85695	41.2112
UP_SEQ_FEATURE	repeat:WD 1	16	3.02457	0.0509181	P35184, P21304, Q05946, Q12038, Q12024, P40217, P38873, P25382, P06103, P20484, P38129, P38149, P48234, P53235, Q06679, P38968	SQT1, PWP1, UTP13, SRO7, YTM1, TIF34, KOG1, RSA4, PRT1, MAK11, TAF5, DUG2, ENP2, YGR054W, UTP4, SEC31	529	106	5872	1.6755	1	0.902579	56.7015
UP_SEQ_FEATURE	repeat:WD 2	16	3.02457	0.0509181	P35184, P21304, Q05946, Q12038, Q12024, P40217, P38873, P25382, P06103, P20484, P38129, P38149, P48234, P53235, Q06679, P38968	SQT1, PWP1, UTP13, SRO7, YTM1, TIF34, KOG1, RSA4, PRT1, MAK11, TAF5, DUG2, ENP2, YGR054W, UTP4, SEC31	529	106	5872	1.6755	1	0.902579	56.7015
UP_KEYWORDS	WD repeat	16	3.02457	0.0554842	P35184, P21304, Q05946, Q12038, Q12024, P40217, P38873, P25382, P06103, P20484, P38129, P38149, P48234, P53235, Q06679, P38968	SQT1, PWP1, UTP13, SRO7, YTM1, TIF34, KOG1, RSA4, PRT1, MAK11, TAF5, DUG2, ENP2, YGR054W, UTP4, SEC31	529	108	5914	1.65623	0.999999	0.29493	52.3852
INTERPRO	IPR019775:WD40 repeat, conserved site	10	1.89036	0.0873121	P25382, P21304, Q05946, Q12038, Q12024, P38873, P38129, P40217, P38149, P38968	RSA4, PWP1, UTP13, SRO7, YTM1, KOG1, TAF5, TIF34, DUG2, SEC31	509	54	5053	1.83839	1	0.94541	76.8538
INTERPRO	IPR015943:WD40/YVTN repeat-like-containing domain	18	3.40265	0.1019	P35184, P21304, Q05946, P53136, Q12038, Q12024, P40217, P38873, P40368, Q06706, P25382, P20484, P38129, P38149, P48234, P53235, Q06679, P38968	SQT1, PWP1, UTP13, NSA1, SRO7, YTM1, TIF34, KOG1, NUP82, IKI3, RSA4, MAK11, TAF5, DUG2, ENP2, YGR054W, UTP4, SEC31	509	122	5053	1.46468	1	0.960673	82.1188
UP_SEQ_FEATURE	repeat:WD 8	4	0.756144	0.168818	P25382, Q05946, Q12038, P38968	RSA4, UTP13, SRO7, SEC31	529	16	5872	2.77505	1	0.992586	94.8267
INTERPRO	IPR020472:G-protein beta WD-40 repeat	6	1.13422	0.195603	P25382, Q05946, P20484, Q12024, P38129, P38149	RSA4, UTP13, MAK11, YTM1, TAF5, DUG2	509	31	5053	1.92141	1	0.994863	96.9386
INTERPRO	IPR017986:WD40-repeat-containing domain	15	2.83554	0.232044	P35184, P21304, Q05946, Q12038, P53136, Q12024, P40217, P38873, P25382, P20484, P38129, P38149, P48234, Q06679, P38968	SQT1, PWP1, UTP13, SRO7, NSA1, YTM1, TIF34, KOG1, RSA4, MAK11, TAF5, DUG2, ENP2, UTP4, SEC31	509	112	5053	1.32955	1	0.997818	98.5431
INTERPRO	IPR001680:WD40 repeat	13	2.45747	0.243253	P35184, P25382, P21304, Q05946, P20484, Q12024, P38873, P38129, P40217, P38149, P48234, Q06679, P38968	SQT1, RSA4, PWP1, UTP13, MAK11, YTM1, KOG1, TAF5, TIF34, DUG2, ENP2, UTP4, SEC31	509	95	5053	1.35847	1	0.99823	98.8488
SMART	SM00320:WD40	13	2.45747	0.319392	P35184, P25382, P21304, Q05946, P20484, Q12024, P38873, P38129, P40217, P38149, P48234, Q06679, P38968	SQT1, RSA4, PWP1, UTP13, MAK11, YTM1, KOG1, TAF5, TIF34, DUG2, ENP2, UTP4, SEC31	194	94	1776	1.26607	1	0.997116	99.0001
UP_SEQ_FEATURE	repeat:WD 7	5	0.94518	0.490443	P25382, Q05946, Q12038, P38873, P38968	RSA4, UTP13, SRO7, KOG1, SEC31	529	40	5872	1.38752	1	0.999995	99.998
Annotation Cluster 31	Enrichment Score: 1.0825840493294632
Category	Term	Count	%	PValue	Genes/Uniprot	Gene Names	List Total	Pop Hits	Pop Total	Fold Enrichment	Bonferroni	Benjamini	FDR
GOTERM_BP_DIRECT	GO:0017148~negative regulation of translation	7	1.32325	0.00437306	P25655, P06102, P25339, Q12514, P12962, Q01560, P39517	CDC39, NOT3, PUF4, NOT5, CAF20, NPL3, DHH1	517	18	5557	4.17999	0.987398	0.120713	6.68851
GOTERM_CC_DIRECT	GO:0030015~CCR4-NOT core complex	4	0.756144	0.0535048	P34909, P25655, P06102, Q12514	MOT2, CDC39, NOT3, NOT5	527	10	5861	4.44858	1	0.397234	52.2684
GOTERM_BP_DIRECT	GO:0000289~nuclear-transcribed mRNA poly(A) tail shortening	3	0.567108	0.200696	P25655, P06102, Q12514	CDC39, NOT3, NOT5	517	9	5557	3.58285	1	0.940984	97.0941
UP_KEYWORDS	Activator	9	1.70132	0.995287	P34909, Q03940, P25655, P06102, P33892, P32389, Q12514, P14741, P43535	MOT2, RVB1, CDC39, NOT3, GCN1, MET4, NOT5, GCN3, GCN20	529	186	5914	0.540948	1	0.999984	100
Annotation Cluster 32	Enrichment Score: 1.0777712051250044
Category	Term	Count	%	PValue	Genes/Uniprot	Gene Names	List Total	Pop Hits	Pop Total	Fold Enrichment	Bonferroni	Benjamini	FDR
GOTERM_BP_DIRECT	GO:0030488~tRNA methylation	7	1.32325	0.015953	Q02648, P38205, Q07527, P53738, P46959, P53177, P38238	TRM44, NCL1, TRM3, TRM112, GCD14, TYW3, TRM7	517	23	5557	3.2713	1	0.323924	22.4324
UP_SEQ_FEATURE	binding site:S-adenosyl-L-methionine	6	1.13422	0.0184093	P40991, P38205, P41819, P46959, P38238, P38074	NOP2, NCL1, DIM1, GCD14, TRM7, HMT1	529	18	5872	3.70006	1	0.796529	25.7409
UP_KEYWORDS	Methyltransferase	14	2.6465	0.0312953	P05374, Q02648, P40991, P38205, P41819, Q07527, P46959, P05694, P53177, Q08985, P38238, Q08961, Q05874, P38074	CHO2, TRM44, NOP2, NCL1, DIM1, TRM3, GCD14, MET6, TYW3, SAM4, TRM7, RKM1, NNT1, HMT1	529	83	5914	1.88571	0.999658	0.198832	33.8545
UP_KEYWORDS	S-adenosyl-L-methionine	13	2.45747	0.0501706	P05374, Q02648, P40991, P38205, P41819, Q07527, P46959, P53177, Q08985, P38238, Q08961, Q05874, P38074	CHO2, TRM44, NOP2, NCL1, DIM1, TRM3, GCD14, TYW3, SAM4, TRM7, RKM1, NNT1, HMT1	529	80	5914	1.81668	0.999998	0.281992	48.7832
GOTERM_BP_DIRECT	GO:0032259~methylation	14	2.6465	0.0567574	P05374, Q02648, P40991, P38205, P41819, Q07527, P46959, P05694, P53177, Q08985, P38238, Q08961, Q05874, P38074	CHO2, TRM44, NOP2, NCL1, DIM1, TRM3, GCD14, MET6, TYW3, SAM4, TRM7, RKM1, NNT1, HMT1	517	87	5557	1.72965	1	0.647018	60.2663
GOTERM_MF_DIRECT	GO:0008168~methyltransferase activity	14	2.6465	0.0700174	P05374, Q02648, P40991, P38205, P41819, Q07527, P46959, P05694, P53177, Q08985, P38238, Q08961, Q05874, P38074	CHO2, TRM44, NOP2, NCL1, DIM1, TRM3, GCD14, MET6, TYW3, SAM4, TRM7, RKM1, NNT1, HMT1	487	84	4885	1.6718	1	0.679295	65.4585
GOTERM_BP_DIRECT	GO:0006400~tRNA modification	5	0.94518	0.45426	Q08647, P38205, P53738, P53177, Q12211	PUS7, NCL1, TRM112, TYW3, PUS1	517	37	5557	1.45251	1	0.996288	99.993
UP_KEYWORDS	tRNA processing	9	1.70132	0.479136	Q02648, Q08647, P53914, P38205, Q07527, P46959, P53177, Q12211, P38238	TRM44, PUS7, KRE33, NCL1, TRM3, GCD14, TYW3, PUS1, TRM7	529	84	5914	1.19781	1	0.900331	99.9792
GOTERM_BP_DIRECT	GO:0008033~tRNA processing	10	1.89036	0.500334	Q02648, Q08647, P53914, P38205, Q07527, P46959, P53177, P33399, Q12211, P38238	TRM44, PUS7, KRE33, NCL1, TRM3, GCD14, TYW3, LHP1, PUS1, TRM7	517	93	5557	1.15576	1	0.998154	99.9983
Annotation Cluster 33	Enrichment Score: 1.0552279977878216
Category	Term	Count	%	PValue	Genes/Uniprot	Gene Names	List Total	Pop Hits	Pop Total	Fold Enrichment	Bonferroni	Benjamini	FDR
UP_KEYWORDS	Signal recognition particle	4	0.756144	0.0115253	P20424, P29478, P38687, P32342	SRP54, SEC65, SRP68, SRP21	529	6	5914	7.45306	0.945506	0.0869156	13.9885
GOTERM_CC_DIRECT	GO:0005786~signal recognition particle, endoplasmic reticulum targeting	4	0.756144	0.0191131	P20424, P29478, P38687, P32342	SRP54, SEC65, SRP68, SRP21	527	7	5861	6.35511	0.997619	0.188026	22.8601
GOTERM_BP_DIRECT	GO:0006616~SRP-dependent cotranslational protein targeting to membrane, translocation	5	0.94518	0.0660299	P20424, P29478, P38687, P10592, P32342	SRP54, SEC65, SRP68, SSA2, SRP21	517	17	5557	3.16134	1	0.685099	66.007
GOTERM_MF_DIRECT	GO:0008312~7S RNA binding	3	0.567108	0.148324	P20424, P29478, P38687	SRP54, SEC65, SRP68	487	7	4885	4.29891	1	0.866309	90.4737
GOTERM_BP_DIRECT	GO:0006614~SRP-dependent cotranslational protein targeting to membrane	3	0.567108	0.2722	P20424, P29478, P38687	SRP54, SEC65, SRP68	517	11	5557	2.93142	1	0.976019	99.3387
KEGG_PATHWAY	sce03060:Protein export	3	0.567108	0.793972	P20424, P29478, P38687	SRP54, SEC65, SRP68	282	22	2194	1.06093	1	0.972971	100
Annotation Cluster 34	Enrichment Score: 1.0427939601656684
Category	Term	Count	%	PValue	Genes/Uniprot	Gene Names	List Total	Pop Hits	Pop Total	Fold Enrichment	Bonferroni	Benjamini	FDR
UP_KEYWORDS	Lipid biosynthesis	15	2.83554	0.0104198	P13259, P05374, P40319, Q00955, P10614, P38221, P54839, P29704, P38703, Q08548, P54781, P15496, P19097, P28496, P07149	PCT1, CHO2, SUR4, ACC1, ERG11, CDS1, ERG13, ERG9, LAG1, ALE1, ERG5, IDI1, FAS2, LAC1, FAS1	529	80	5914	2.09617	0.927855	0.0813123	12.7296
UP_KEYWORDS	Lipid metabolism	17	3.21361	0.212496	P05374, P13259, P40319, Q00955, P10614, P38221, P54839, P29704, P38703, Q08548, P25045, P47912, P54781, P15496, P19097, P28496, P07149	CHO2, PCT1, SUR4, ACC1, ERG11, CDS1, ERG13, ERG9, LAG1, ALE1, LCB1, FAA4, ERG5, IDI1, FAS2, LAC1, FAS1	529	144	5914	1.31981	1	0.65724	95.519
GOTERM_BP_DIRECT	GO:0006629~lipid metabolic process	17	3.21361	0.336054	P05374, P13259, P40319, Q00955, P10614, P38221, P54839, P29704, P38703, Q08548, P25045, P47912, P54781, P15496, P19097, P28496, P07149	CHO2, PCT1, SUR4, ACC1, ERG11, CDS1, ERG13, ERG9, LAG1, ALE1, LCB1, FAA4, ERG5, IDI1, FAS2, LAC1, FAS1	517	152	5557	1.20214	1	0.987661	99.845
Annotation Cluster 35	Enrichment Score: 0.9544886254242329
Category	Term	Count	%	PValue	Genes/Uniprot	Gene Names	List Total	Pop Hits	Pop Total	Fold Enrichment	Bonferroni	Benjamini	FDR
INTERPRO	IPR011989:Armadillo-like helical	14	2.6465	0.0127918	P40069, P53009, Q12028, P42945, P25339, P38873, P36000, P46682, P36024, P16521, Q04175, P33892, P35194, Q08972	KAP123, SCY1, APL4, UTP10, PUF4, KOG1, APL2, APL6, SIS2, YEF3, SXM1, GCN1, UTP20, NEW1	509	66	5053	2.10579	0.999999	0.549219	18.6336
UP_SEQ_FEATURE	repeat:HEAT 4	6	1.13422	0.0679829	P40069, P16521, P33892, P38873, P46682, P35194	KAP123, YEF3, GCN1, KOG1, APL6, UTP20	529	25	5872	2.66405	1	0.939256	67.6212
UP_SEQ_FEATURE	repeat:HEAT 3	6	1.13422	0.0679829	P40069, P16521, P33892, P38873, P46682, P35194	KAP123, YEF3, GCN1, KOG1, APL6, UTP20	529	25	5872	2.66405	1	0.939256	67.6212
INTERPRO	IPR021133:HEAT, type 2	4	0.756144	0.0709258	P40069, P16521, P42945, P33892	KAP123, YEF3, UTP10, GCN1	509	10	5053	3.97092	1	0.916544	69.2205
UP_SEQ_FEATURE	repeat:HEAT 2	6	1.13422	0.0892643	P40069, P16521, P33892, P38873, P46682, P35194	KAP123, YEF3, GCN1, KOG1, APL6, UTP20	529	27	5872	2.46671	1	0.957422	77.6341
UP_SEQ_FEATURE	repeat:HEAT 1	6	1.13422	0.0892643	P40069, P16521, P33892, P38873, P46682, P35194	KAP123, YEF3, GCN1, KOG1, APL6, UTP20	529	27	5872	2.46671	1	0.957422	77.6341
UP_SEQ_FEATURE	repeat:HEAT 5	5	0.94518	0.113737	P40069, P16521, P33892, P46682, P35194	KAP123, YEF3, GCN1, APL6, UTP20	529	21	5872	2.6429	1	0.976157	85.5419
UP_SEQ_FEATURE	repeat:HEAT 7	4	0.756144	0.146387	P40069, P16521, P33892, P35194	KAP123, YEF3, GCN1, UTP20	529	15	5872	2.96005	1	0.987821	92.0749
UP_SEQ_FEATURE	repeat:HEAT 6	4	0.756144	0.168818	P40069, P16521, P33892, P35194	KAP123, YEF3, GCN1, UTP20	529	16	5872	2.77505	1	0.992586	94.8267
UP_SEQ_FEATURE	repeat:HEAT 11	3	0.567108	0.190812	P40069, P33892, P35194	KAP123, GCN1, UTP20	529	9	5872	3.70006	1	0.995301	96.6331
UP_SEQ_FEATURE	repeat:HEAT 10	3	0.567108	0.225074	P40069, P33892, P35194	KAP123, GCN1, UTP20	529	10	5872	3.33006	1	0.996964	98.3162
UP_SEQ_FEATURE	repeat:HEAT 9	3	0.567108	0.294424	P40069, P33892, P35194	KAP123, GCN1, UTP20	529	12	5872	2.77505	1	0.999144	99.6249
UP_SEQ_FEATURE	repeat:HEAT 8	3	0.567108	0.328878	P40069, P33892, P35194	KAP123, GCN1, UTP20	529	13	5872	2.56158	1	0.999641	99.8318
Annotation Cluster 36	Enrichment Score: 0.9474435702337168
Category	Term	Count	%	PValue	Genes/Uniprot	Gene Names	List Total	Pop Hits	Pop Total	Fold Enrichment	Bonferroni	Benjamini	FDR
UP_SEQ_FEATURE	domain:Brix	3	0.567108	0.0949153	Q08235, P38789, P53941	BRX1, SSF1, IMP4	529	6	5872	5.55009	1	0.958171	79.7563
INTERPRO	IPR007109:Brix domain	3	0.567108	0.115221	Q08235, P38789, P53941	BRX1, SSF1, IMP4	509	6	5053	4.96365	1	0.96407	85.9249
SMART	SM00879:SM00879	3	0.567108	0.131462	Q08235, P38789, P53941	BRX1, SSF1, IMP4	194	6	1776	4.57732	1	0.953136	81.492
Annotation Cluster 37	Enrichment Score: 0.9181221705065926
Category	Term	Count	%	PValue	Genes/Uniprot	Gene Names	List Total	Pop Hits	Pop Total	Fold Enrichment	Bonferroni	Benjamini	FDR
UP_SEQ_FEATURE	repeat:4	6	1.13422	0.0420208	Q00402, P15108, P34167, P04050, P27692, P33322	NUM1, HSC82, TIF3, RPO21, SPT5, CBF5	529	22	5872	3.02732	1	0.897439	49.7219
UP_SEQ_FEATURE	repeat:6	5	0.94518	0.0717695	Q00402, P34167, P04050, P27692, P33322	NUM1, TIF3, RPO21, SPT5, CBF5	529	18	5872	3.08339	1	0.937056	69.6652
UP_SEQ_FEATURE	repeat:5	5	0.94518	0.0847253	Q00402, P34167, P04050, P27692, P33322	NUM1, TIF3, RPO21, SPT5, CBF5	529	19	5872	2.9211	1	0.958473	75.7803
UP_SEQ_FEATURE	repeat:10	4	0.756144	0.0862405	Q00402, P04050, P27692, P33322	NUM1, RPO21, SPT5, CBF5	529	12	5872	3.70006	1	0.956703	76.4146
UP_SEQ_FEATURE	repeat:3	6	1.13422	0.0892643	Q00402, P15108, P34167, P04050, P27692, P33322	NUM1, HSC82, TIF3, RPO21, SPT5, CBF5	529	27	5872	2.46671	1	0.957422	77.6341
UP_SEQ_FEATURE	repeat:9	4	0.756144	0.125033	Q00402, P04050, P27692, P33322	NUM1, RPO21, SPT5, CBF5	529	14	5872	3.17148	1	0.982074	88.2272
UP_SEQ_FEATURE	repeat:2	7	1.32325	0.145375	P13393, Q00402, P15108, P34167, P04050, P27692, P33322	SPT15, NUM1, HSC82, TIF3, RPO21, SPT5, CBF5	529	40	5872	1.94253	1	0.988748	91.9231
UP_SEQ_FEATURE	repeat:7	4	0.756144	0.146387	Q00402, P04050, P27692, P33322	NUM1, RPO21, SPT5, CBF5	529	15	5872	2.96005	1	0.987821	92.0749
UP_SEQ_FEATURE	repeat:8	4	0.756144	0.168818	Q00402, P04050, P27692, P33322	NUM1, RPO21, SPT5, CBF5	529	16	5872	2.77505	1	0.992586	94.8267
UP_SEQ_FEATURE	repeat:12	3	0.567108	0.190812	Q00402, P04050, P27692	NUM1, RPO21, SPT5	529	9	5872	3.70006	1	0.995301	96.6331
UP_SEQ_FEATURE	repeat:11	3	0.567108	0.225074	Q00402, P04050, P27692	NUM1, RPO21, SPT5	529	10	5872	3.33006	1	0.996964	98.3162
UP_SEQ_FEATURE	repeat:1	6	1.13422	0.253141	P13393, Q00402, P15108, P04050, P27692, P33322	SPT15, NUM1, HSC82, RPO21, SPT5, CBF5	529	38	5872	1.75266	1	0.998297	99.0675
Annotation Cluster 38	Enrichment Score: 0.8912155423972171
Category	Term	Count	%	PValue	Genes/Uniprot	Gene Names	List Total	Pop Hits	Pop Total	Fold Enrichment	Bonferroni	Benjamini	FDR
GOTERM_BP_DIRECT	GO:0031120~snRNA pseudouridine synthesis	4	0.756144	0.0128558	Q08647, P33322, Q6Q547, Q12211	PUS7, CBF5, NOP10, PUS1	517	6	5557	7.1657	0.999998	0.275904	18.4849
GOTERM_BP_DIRECT	GO:1990481~mRNA pseudouridine synthesis	3	0.567108	0.1004	Q08647, P33322, Q12211	PUS7, CBF5, PUS1	517	6	5557	5.37427	1	0.802993	81.1991
GOTERM_BP_DIRECT	GO:0001522~pseudouridine synthesis	4	0.756144	0.112989	Q08647, P33322, Q6Q547, Q12211	PUS7, CBF5, NOP10, PUS1	517	13	5557	3.30725	1	0.832362	84.9513
INTERPRO	IPR020103:Pseudouridine synthase, catalytic domain	3	0.567108	0.265935	Q08647, P33322, Q12211	PUS7, CBF5, PUS1	509	10	5053	2.97819	1	0.99898	99.2929
GOTERM_BP_DIRECT	GO:0009451~RNA modification	3	0.567108	0.308027	Q08647, P33322, Q12211	PUS7, CBF5, PUS1	517	12	5557	2.68714	1	0.984637	99.7021
GOTERM_MF_DIRECT	GO:0009982~pseudouridine synthase activity	3	0.567108	0.376246	Q08647, P33322, Q12211	PUS7, CBF5, PUS1	487	13	4885	2.3148	1	0.99138	99.9004
Annotation Cluster 39	Enrichment Score: 0.8800392521563273
Category	Term	Count	%	PValue	Genes/Uniprot	Gene Names	List Total	Pop Hits	Pop Total	Fold Enrichment	Bonferroni	Benjamini	FDR
INTERPRO	IPR002034:Alpha-isopropylmalate/homocitrate synthase, conserved site	3	0.567108	0.052753	Q12122, P48570, Q12166	LYS21, LYS20, LEU9	509	4	5053	7.44548	1	0.86634	58.023
GOTERM_BP_DIRECT	GO:0019752~carboxylic acid metabolic process	4	0.756144	0.074765	Q12122, P48570, Q12166, P22133	LYS21, LYS20, LEU9, MDH2	517	11	5557	3.90856	1	0.719546	70.6959
INTERPRO	IPR000891:Pyruvate carboxyltransferase	3	0.567108	0.115221	Q12122, P48570, Q12166	LYS21, LYS20, LEU9	509	6	5053	4.96365	1	0.96407	85.9249
INTERPRO	IPR013785:Aldolase-type TIM barrel	8	1.51229	0.135086	P40545, P50095, Q12122, P14540, P48570, P14843, Q12166, P32449	HIS6, IMD3, LYS21, FBA1, LYS20, ARO3, LEU9, ARO4	509	43	5053	1.84694	1	0.978705	90.2166
GOTERM_MF_DIRECT	GO:0046912~transferase activity, transferring acyl groups, acyl groups converted into alkyl on transfer	3	0.567108	0.223326	Q12122, P48570, Q12166	LYS21, LYS20, LEU9	487	9	4885	3.3436	1	0.945471	97.5303
KEGG_PATHWAY	sce00620:Pyruvate metabolism	7	1.32325	0.382593	P54115, P52910, Q00955, Q12122, P48570, Q12166, P22133	ALD6, ACS2, ACC1, LYS21, LYS20, LEU9, MDH2	282	39	2194	1.39644	1	0.797363	99.5064
Annotation Cluster 40	Enrichment Score: 0.8607817351818479
Category	Term	Count	%	PValue	Genes/Uniprot	Gene Names	List Total	Pop Hits	Pop Total	Fold Enrichment	Bonferroni	Benjamini	FDR
GOTERM_BP_DIRECT	GO:0000447~endonucleolytic cleavage in ITS1 to separate SSU-rRNA from 5.8S rRNA and LSU-rRNA from tricistronic rRNA transcript (SSU-rRNA, 5.8S rRNA, LSU-rRNA)	8	1.51229	0.0987973	P38719, P42846, Q05946, P42945, Q12499, P35194, P43586, P25586	DBP8, KRI1, UTP13, UTP10, NOP58, UTP20, LOC1, KRR1	517	43	5557	1.99973	1	0.807544	80.663
GOTERM_BP_DIRECT	GO:0000480~endonucleolytic cleavage in 5'-ETS of tricistronic rRNA transcript (SSU-rRNA, 5.8S rRNA, LSU-rRNA)	6	1.13422	0.155093	P38719, Q05946, P42945, Q12499, P35194, P43586	DBP8, UTP13, UTP10, NOP58, UTP20, LOC1	517	31	5557	2.08036	1	0.903286	93.0193
GOTERM_BP_DIRECT	GO:0000472~endonucleolytic cleavage to generate mature 5'-end of SSU-rRNA from (SSU-rRNA, 5.8S rRNA, LSU-rRNA)	6	1.13422	0.170733	P38719, Q05946, P42945, Q12499, P35194, P43586	DBP8, UTP13, UTP10, NOP58, UTP20, LOC1	517	32	5557	2.01535	1	0.914429	94.8034
Annotation Cluster 41	Enrichment Score: 0.7696650567434773
Category	Term	Count	%	PValue	Genes/Uniprot	Gene Names	List Total	Pop Hits	Pop Total	Fold Enrichment	Bonferroni	Benjamini	FDR
UP_SEQ_FEATURE	domain:Arf-GAP	3	0.567108	0.0949153	P40529, P35197, P38682	AGE2, GCS1, GLO3	529	6	5872	5.55009	1	0.958171	79.7563
INTERPRO	IPR001164:Arf GTPase activating protein	3	0.567108	0.115221	P40529, P35197, P38682	AGE2, GCS1, GLO3	509	6	5053	4.96365	1	0.96407	85.9249
UP_KEYWORDS	GTPase activation	7	1.32325	0.118167	P20424, P40529, P32864, P35197, Q12434, P39960, P38682	SRP54, AGE2, MRS6, GCS1, RDI1, BEM2, GLO3	529	38	5914	2.0594	1	0.468089	80.4984
SMART	SM00105:ArfGap	3	0.567108	0.131462	P40529, P35197, P38682	AGE2, GCS1, GLO3	194	6	1776	4.57732	1	0.953136	81.492
COG_ONTOLOGY	Intracellular trafficking and secretion	8	1.51229	0.137628	P40529, P22214, P36000, P28496, P46682, P35197, P38682, P30619	AGE2, SEC22, APL2, LAC1, APL6, GCS1, GLO3, SEC1	108	40	977	1.80926	0.97138	0.694114	69.5103
GOTERM_MF_DIRECT	GO:0005096~GTPase activator activity	9	1.70132	0.175786	P20424, Q12038, P40529, P32864, P35197, Q12434, P39960, P38682, P38431	SRP54, SRO7, AGE2, MRS6, GCS1, RDI1, BEM2, GLO3, TIF5	487	55	4885	1.6414	1	0.901717	94.1051
KEGG_PATHWAY	sce04144:Endocytosis	4	0.756144	0.996524	P40529, P10592, P35197, P38682	AGE2, SSA2, GCS1, GLO3	282	71	2194	0.438318	1	0.999957	100
Annotation Cluster 42	Enrichment Score: 0.7551555995636354
Category	Term	Count	%	PValue	Genes/Uniprot	Gene Names	List Total	Pop Hits	Pop Total	Fold Enrichment	Bonferroni	Benjamini	FDR
GOTERM_BP_DIRECT	GO:0016126~sterol biosynthetic process	7	1.32325	0.0341024	P53860, P10614, P54781, P15496, P38837, P54839, P29704	PDR16, ERG11, ERG5, IDI1, NSG1, ERG13, ERG9	517	27	5557	2.78666	1	0.506728	42.1936
UP_KEYWORDS	Sterol biosynthesis	5	0.94518	0.127194	P10614, P54781, P15496, P54839, P29704	ERG11, ERG5, IDI1, ERG13, ERG9	529	22	5914	2.54081	1	0.474957	82.9399
UP_KEYWORDS	Sterol metabolism	5	0.94518	0.127194	P10614, P54781, P15496, P54839, P29704	ERG11, ERG5, IDI1, ERG13, ERG9	529	22	5914	2.54081	1	0.474957	82.9399
UP_KEYWORDS	Steroid metabolism	5	0.94518	0.127194	P10614, P54781, P15496, P54839, P29704	ERG11, ERG5, IDI1, ERG13, ERG9	529	22	5914	2.54081	1	0.474957	82.9399
GOTERM_BP_DIRECT	GO:0008202~steroid metabolic process	5	0.94518	0.159319	P10614, P54781, P15496, P54839, P29704	ERG11, ERG5, IDI1, ERG13, ERG9	517	23	5557	2.33664	1	0.903719	93.5509
UP_KEYWORDS	Steroid biosynthesis	5	0.94518	0.161076	P10614, P54781, P15496, P54839, P29704	ERG11, ERG5, IDI1, ERG13, ERG9	529	24	5914	2.32908	1	0.55136	89.8033
GOTERM_BP_DIRECT	GO:0006694~steroid biosynthetic process	5	0.94518	0.197526	P10614, P54781, P15496, P54839, P29704	ERG11, ERG5, IDI1, ERG13, ERG9	517	25	5557	2.14971	1	0.94013	96.9067
GOTERM_BP_DIRECT	GO:0008299~isoprenoid biosynthetic process	3	0.567108	0.308027	P15496, P54839, P29704	IDI1, ERG13, ERG9	517	12	5557	2.68714	1	0.984637	99.7021
GOTERM_BP_DIRECT	GO:0006696~ergosterol biosynthetic process	4	0.756144	0.38787	P10614, P54781, P54839, P29704	ERG11, ERG5, ERG13, ERG9	517	24	5557	1.79142	1	0.992901	99.957
KEGG_PATHWAY	sce00100:Steroid biosynthesis	3	0.567108	0.660785	P10614, P54781, P29704	ERG11, ERG5, ERG9	282	17	2194	1.37297	1	0.939498	99.9993
Annotation Cluster 43	Enrichment Score: 0.7133058387020343
Category	Term	Count	%	PValue	Genes/Uniprot	Gene Names	List Total	Pop Hits	Pop Total	Fold Enrichment	Bonferroni	Benjamini	FDR
INTERPRO	IPR013816:ATP-grasp fold, subdomain 2	4	0.756144	0.112012	Q06685, Q00955, P03965, P32528	VIP1, ACC1, CPA2, DUR1,2	509	12	5053	3.3091	1	0.966403	85.0846
INTERPRO	IPR005479:Carbamoyl-phosphate synthetase large subunit-like, ATP-binding domain	3	0.567108	0.150923	Q00955, P03965, P32528	ACC1, CPA2, DUR1,2	509	7	5053	4.25456	1	0.984112	92.7232
INTERPRO	IPR011761:ATP-grasp fold	3	0.567108	0.226933	Q00955, P03965, P32528	ACC1, CPA2, DUR1,2	509	9	5053	3.3091	1	0.997759	98.3798
INTERPRO	IPR013815:ATP-grasp fold, subdomain 1	3	0.567108	0.265935	Q00955, P03965, P32528	ACC1, CPA2, DUR1,2	509	10	5053	2.97819	1	0.99898	99.2929
INTERPRO	IPR016185:Pre-ATP-grasp domain	3	0.567108	0.265935	Q00955, P03965, P32528	ACC1, CPA2, DUR1,2	509	10	5053	2.97819	1	0.99898	99.2929
Annotation Cluster 44	Enrichment Score: 0.6992850290820788
Category	Term	Count	%	PValue	Genes/Uniprot	Gene Names	List Total	Pop Hits	Pop Total	Fold Enrichment	Bonferroni	Benjamini	FDR
GOTERM_BP_DIRECT	GO:0000467~exonucleolytic trimming to generate mature 3'-end of 5.8S rRNA from tricistronic rRNA transcript (SSU-rRNA, 5.8S rRNA, LSU-rRNA)	5	0.94518	0.0789206	P53256, P32835, Q12149, Q12277, P47047	RRP46, GSP1, RRP6, RRP42, MTR4	517	18	5557	2.98571	1	0.733745	72.7072
GOTERM_BP_DIRECT	GO:0071028~nuclear mRNA surveillance	4	0.756144	0.13436	P53256, Q12149, P38996, Q12277	RRP46, RRP6, NAB3, RRP42	517	14	5557	3.07101	1	0.872176	89.7623
GOTERM_BP_DIRECT	GO:0071051~polyadenylation-dependent snoRNA 3'-end processing	4	0.756144	0.156984	P53256, Q12149, Q12277, P47047	RRP46, RRP6, RRP42, MTR4	517	15	5557	2.86628	1	0.903154	93.2621
GOTERM_BP_DIRECT	GO:0071042~nuclear polyadenylation-dependent mRNA catabolic process	4	0.756144	0.156984	P53256, Q12149, Q12277, P47047	RRP46, RRP6, RRP42, MTR4	517	15	5557	2.86628	1	0.903154	93.2621
GOTERM_BP_DIRECT	GO:0034475~U4 snRNA 3'-end processing	4	0.756144	0.156984	P53256, Q12149, Q12277, P47047	RRP46, RRP6, RRP42, MTR4	517	15	5557	2.86628	1	0.903154	93.2621
GOTERM_BP_DIRECT	GO:0071038~nuclear polyadenylation-dependent tRNA catabolic process	4	0.756144	0.180673	P53256, Q12149, Q12277, P47047	RRP46, RRP6, RRP42, MTR4	517	16	5557	2.68714	1	0.924436	95.7046
GOTERM_BP_DIRECT	GO:0071035~nuclear polyadenylation-dependent rRNA catabolic process	4	0.756144	0.256292	P53256, Q12149, Q12277, P47047	RRP46, RRP6, RRP42, MTR4	517	19	5557	2.26285	1	0.971573	99.0695
GOTERM_BP_DIRECT	GO:0034476~U5 snRNA 3'-end processing	3	0.567108	0.2722	Q12149, Q12277, P47047	RRP6, RRP42, MTR4	517	11	5557	2.93142	1	0.976019	99.3387
UP_KEYWORDS	Exosome	3	0.567108	0.291467	P53256, Q12149, Q12277	RRP46, RRP6, RRP42	529	12	5914	2.7949	1	0.752144	98.8655
GOTERM_CC_DIRECT	GO:0000178~exosome (RNase complex)	3	0.567108	0.293625	P53256, Q12149, Q12277	RRP46, RRP6, RRP42	527	12	5861	2.78036	1	0.896346	99.0676
GOTERM_CC_DIRECT	GO:0000176~nuclear exosome (RNase complex)	3	0.567108	0.459133	P53256, Q12149, Q12277	RRP46, RRP6, RRP42	527	17	5861	1.96261	1	0.97699	99.9743
Annotation Cluster 45	Enrichment Score: 0.6709849353640963
Category	Term	Count	%	PValue	Genes/Uniprot	Gene Names	List Total	Pop Hits	Pop Total	Fold Enrichment	Bonferroni	Benjamini	FDR
UP_KEYWORDS	NADP	14	2.6465	0.0782995	P54115, P13663, P10614, P54781, P19097, P07702, P38720, P29704, P53128, P06168, P21954, P32791, P07262, P07149	ALD6, HOM2, ERG11, ERG5, FAS2, LYS2, GND1, ERG9, MET13, ILV5, IDP1, FRE1, GDH1, FAS1	529	95	5914	1.64752	1	0.35911	65.3503
UP_KEYWORDS	Oxidoreductase	28	5.29301	0.216155	P38720, P29704, P53128, P40032, P06168, P54115, P32771, P38758, P04037, P13663, P54781, P40579, P11353, P32791, P21524, P47096, P07149, P07262, P10614, P00431, P36136, P07702, Q12746, P21954, P23202, P50095, P19097, P22133	GND1, ERG9, MET13, TPA1, ILV5, ALD6, SFA1, TDA3, COX4, HOM2, ERG5, YIR035C, HEM13, FRE1, RNR1, BNA1, FAS1, GDH1, ERG11, CCP1, SHB17, LYS2, PGA3, IDP1, URE2, IMD3, FAS2, MDH2	529	258	5914	1.21329	1	0.651444	95.7822
GOTERM_BP_DIRECT	GO:0055114~oxidation-reduction process	36	6.80529	0.321774	P32864, P38720, P29704, P53128, P40032, P40202, P06168, P47047, P54115, P32771, P38758, P04037, P13663, P54781, Q04869, P40579, Q03088, P11353, P07143, Q02784, P21524, P32791, P07262, P07149, P47096, P28777, P10614, P00431, P36136, P07702, Q12746, P21954, P23202, P50095, P19097, P22133	MRS6, GND1, ERG9, MET13, TPA1, CCS1, ILV5, MTR4, ALD6, SFA1, TDA3, COX4, HOM2, ERG5, YMR315W, YIR035C, SVL3, HEM13, CYT1, GRX5, RNR1, FRE1, GDH1, FAS1, BNA1, ARO2, ERG11, CCP1, SHB17, LYS2, PGA3, IDP1, URE2, IMD3, FAS2, MDH2	517	347	5557	1.11512	1	0.985853	99.783
GOTERM_MF_DIRECT	GO:0016491~oxidoreductase activity	32	6.04915	0.380176	P32864, P38720, P29704, P53128, P40032, P06168, P47047, P54115, P32771, P38758, P04037, P13663, P54781, Q04869, P40579, Q03088, P11353, P21524, P32791, P47096, P07149, P07262, P10614, P00431, P36136, P07702, Q12746, P21954, P23202, P50095, P19097, P22133	MRS6, GND1, ERG9, MET13, TPA1, ILV5, MTR4, ALD6, SFA1, TDA3, COX4, HOM2, ERG5, YMR315W, YIR035C, SVL3, HEM13, RNR1, FRE1, BNA1, FAS1, GDH1, ERG11, CCP1, SHB17, LYS2, PGA3, IDP1, URE2, IMD3, FAS2, MDH2	487	292	4885	1.09927	1	0.99045	99.9092
Annotation Cluster 46	Enrichment Score: 0.628975892010559
Category	Term	Count	%	PValue	Genes/Uniprot	Gene Names	List Total	Pop Hits	Pop Total	Fold Enrichment	Bonferroni	Benjamini	FDR
GOTERM_MF_DIRECT	GO:0016887~ATPase activity	18	3.40265	0.124735	P42942, P38629, P38719, P15108, P32908, P40024, P10592, P30771, P33302, P47122, P47037, P16521, P0CS90, Q07844, P19882, Q08972, P43535, P38219	YGR210C, RFC3, DBP8, HSC82, SMC1, ARB1, SSA2, NAM7, PDR5, NPA3, SMC3, YEF3, SSC1, RIX7, HSP60, NEW1, GCN20, OLA1	487	127	4885	1.42169	1	0.825784	85.7871
UP_SEQ_FEATURE	domain:ABC transporter 1	5	0.94518	0.164063	P16521, P40024, Q08972, P33302, P43535	YEF3, ARB1, NEW1, PDR5, GCN20	529	24	5872	2.31254	1	0.992319	94.3318
UP_SEQ_FEATURE	domain:ABC transporter 2	5	0.94518	0.164063	P16521, P40024, Q08972, P33302, P43535	YEF3, ARB1, NEW1, PDR5, GCN20	529	24	5872	2.31254	1	0.992319	94.3318
UP_SEQ_FEATURE	nucleotide phosphate-binding region:ATP 1	4	0.756144	0.216232	P16521, P40024, Q08972, P43535	YEF3, ARB1, NEW1, GCN20	529	18	5872	2.46671	1	0.996498	97.9807
UP_SEQ_FEATURE	nucleotide phosphate-binding region:ATP 2	4	0.756144	0.216232	P16521, P40024, Q08972, P43535	YEF3, ARB1, NEW1, GCN20	529	18	5872	2.46671	1	0.996498	97.9807
INTERPRO	IPR017871:ABC transporter, conserved site	5	0.94518	0.285191	P16521, P40024, Q08972, P33302, P43535	YEF3, ARB1, NEW1, PDR5, GCN20	509	27	5053	1.83839	1	0.999347	99.5381
INTERPRO	IPR003593:AAA+ ATPase domain	11	2.0794	0.321357	P38629, P20424, P16521, Q03940, P40024, P25454, Q07844, P30771, Q08972, P33302, P43535	RFC3, SRP54, YEF3, RVB1, ARB1, RAD51, RIX7, NAM7, NEW1, PDR5, GCN20	509	83	5053	1.31567	1	0.999664	99.7989
INTERPRO	IPR003439:ABC transporter-like	5	0.94518	0.380091	P16521, P40024, Q08972, P33302, P43535	YEF3, ARB1, NEW1, PDR5, GCN20	509	31	5053	1.60118	1	0.999938	99.9528
SMART	SM00382:AAA	11	2.0794	0.399352	P38629, P20424, P16521, Q03940, P40024, P25454, Q07844, P30771, Q08972, P33302, P43535	RFC3, SRP54, YEF3, RVB1, ARB1, RAD51, RIX7, NAM7, NEW1, PDR5, GCN20	194	82	1776	1.22806	1	0.999127	99.776
Annotation Cluster 47	Enrichment Score: 0.6147532617795536
Category	Term	Count	%	PValue	Genes/Uniprot	Gene Names	List Total	Pop Hits	Pop Total	Fold Enrichment	Bonferroni	Benjamini	FDR
UP_SEQ_FEATURE	active site:For GATase activity	4	0.756144	0.192155	P38972, P49090, P28274, P38625	ADE6, ASN2, URA7, GUA1	529	17	5872	2.61181	1	0.994302	96.7215
UP_SEQ_FEATURE	domain:Glutamine amidotransferase type-1	3	0.567108	0.225074	P38972, P28274, P38625	ADE6, URA7, GUA1	529	10	5872	3.33006	1	0.996964	98.3162
UP_KEYWORDS	Glutamine amidotransferase	4	0.756144	0.237567	P38972, P49090, P28274, P38625	ADE6, ASN2, URA7, GUA1	529	19	5914	2.3536	1	0.678479	97.0574
INTERPRO	IPR017926:Glutamine amidotransferase	3	0.567108	0.265935	P38972, P28274, P38625	ADE6, URA7, GUA1	509	10	5053	2.97819	1	0.99898	99.2929
GOTERM_BP_DIRECT	GO:0006541~glutamine metabolic process	4	0.756144	0.308813	P38972, P49090, P28274, P38625	ADE6, ASN2, URA7, GUA1	517	21	5557	2.04734	1	0.984103	99.7074
Annotation Cluster 48	Enrichment Score: 0.569740877746206
Category	Term	Count	%	PValue	Genes/Uniprot	Gene Names	List Total	Pop Hits	Pop Total	Fold Enrichment	Bonferroni	Benjamini	FDR
GOTERM_BP_DIRECT	GO:0042759~long-chain fatty acid biosynthetic process	3	0.567108	0.0454917	Q00955, P19097, P07149	ACC1, FAS2, FAS1	517	4	5557	8.06141	1	0.583852	52.0701
KEGG_PATHWAY	sce00061:Fatty acid biosynthesis	4	0.756144	0.157517	Q00955, P47912, P19097, P07149	ACC1, FAA4, FAS2, FAS1	282	11	2194	2.82914	1	0.59914	84.8597
UP_KEYWORDS	Fatty acid biosynthesis	4	0.756144	0.21316	P40319, Q00955, P19097, P07149	SUR4, ACC1, FAS2, FAS1	529	18	5914	2.48435	1	0.652035	95.5678
KEGG_PATHWAY	sce01212:Fatty acid metabolism	5	0.94518	0.308372	P40319, Q00955, P47912, P19097, P07149	SUR4, ACC1, FAA4, FAS2, FAS1	282	22	2194	1.76821	1	0.743693	98.2767
UP_KEYWORDS	Fatty acid metabolism	5	0.94518	0.339886	P40319, Q00955, P47912, P19097, P07149	SUR4, ACC1, FAA4, FAS2, FAS1	529	33	5914	1.69388	1	0.798882	99.5479
GOTERM_BP_DIRECT	GO:0006633~fatty acid biosynthetic process	4	0.756144	0.361645	P40319, Q00955, P19097, P07149	SUR4, ACC1, FAS2, FAS1	517	23	5557	1.86931	1	0.990129	99.9167
COG_ONTOLOGY	Lipid metabolism	4	0.756144	0.377711	Q00955, P47912, P14743, P07149	ACC1, FAA4, NMT1, FAS1	108	20	977	1.80926	0.999989	0.94193	97.7745
GOTERM_BP_DIRECT	GO:0006631~fatty acid metabolic process	5	0.94518	0.389546	P40319, Q00955, P47912, P19097, P07149	SUR4, ACC1, FAA4, FAS2, FAS1	517	34	5557	1.58067	1	0.992742	99.9589
UP_KEYWORDS	Multifunctional enzyme	6	1.13422	0.874899	Q00955, P19097, P32528, P29704, P47100, P07149	ACC1, FAS2, DUR1,2, ERG9, TY1B-JR2, FAS1	529	83	5914	0.808163	1	0.995126	100
Annotation Cluster 49	Enrichment Score: 0.5598624622263383
Category	Term	Count	%	PValue	Genes/Uniprot	Gene Names	List Total	Pop Hits	Pop Total	Fold Enrichment	Bonferroni	Benjamini	FDR
INTERPRO	IPR015940:Ubiquitin-associated/translation elongation factor EF1B, N-terminal, eukaryote	3	0.567108	0.188399	P32628, P48510, P38237	RAD23, DSK2, UBP14	509	8	5053	3.72274	1	0.994302	96.4687
SMART	SM00165:UBA	3	0.567108	0.212837	P32628, P48510, P38237	RAD23, DSK2, UBP14	194	8	1776	3.43299	1	0.989402	94.2984
INTERPRO	IPR009060:UBA-like	3	0.567108	0.521538	P32628, P48510, P38237	RAD23, DSK2, UBP14	509	17	5053	1.75188	1	0.999999	99.9993
Annotation Cluster 50	Enrichment Score: 0.5437828457026666
Category	Term	Count	%	PValue	Genes/Uniprot	Gene Names	List Total	Pop Hits	Pop Total	Fold Enrichment	Bonferroni	Benjamini	FDR
INTERPRO	IPR022751:Alpha-mannosyltransferase	3	0.567108	0.115221	P39106, P38069, P46982	MNN1, MNN2, MNN5	509	6	5053	4.96365	1	0.96407	85.9249
KEGG_PATHWAY	sce00513:Various types of N-glycan biosynthesis	7	1.32325	0.176894	Q92316, P39106, P38069, P53868, P46982, P23642, P53178	OST5, MNN1, MNN2, ALG9, MNN5, VAN1, ALG13	282	30	2194	1.81537	1	0.589311	88.2825
GOTERM_BP_DIRECT	GO:0097502~mannosylation	5	0.94518	0.45426	P39106, P38069, P53868, P46982, P23642	MNN1, MNN2, ALG9, MNN5, VAN1	517	37	5557	1.45251	1	0.996288	99.993
GOTERM_BP_DIRECT	GO:0006486~protein glycosylation	6	1.13422	0.721639	Q92316, P32621, P39106, P38069, P53868, P46982	OST5, GDA1, MNN1, MNN2, ALG9, MNN5	517	64	5557	1.00768	1	0.999966	100
Annotation Cluster 51	Enrichment Score: 0.4773498738596684
Category	Term	Count	%	PValue	Genes/Uniprot	Gene Names	List Total	Pop Hits	Pop Total	Fold Enrichment	Bonferroni	Benjamini	FDR
GOTERM_BP_DIRECT	GO:0006626~protein targeting to mitochondrion	12	2.26843	0.035292	P15705, P04037, P38523, O74700, P07143, P10507, P25491, P87108, P32897, P40202, P19882, P19414	STI1, COX4, MGE1, TIM9, CYT1, MAS1, YDJ1, TIM10, TIM23, CCS1, HSP60, ACO1	517	65	5557	1.98435	1	0.50495	43.3079
GOTERM_CC_DIRECT	GO:0005758~mitochondrial intermembrane space	10	1.89036	0.352661	P04037, P00431, O74700, P07143, P87108, Q99258, P32897, P40202, P19882, P19414	COX4, CCP1, TIM9, CYT1, TIM10, RIB3, TIM23, CCS1, HSP60, ACO1	527	85	5861	1.3084	1	0.934282	99.7117
GOTERM_CC_DIRECT	GO:0005743~mitochondrial inner membrane	13	2.45747	0.99104	P04037, P38523, P38988, Q06493, P0CS90, O74700, P07143, P87108, P16622, P40202, P32897, P19882, Q08179	COX4, MGE1, GGC1, YLH47, SSC1, TIM9, CYT1, TIM10, HEM15, CCS1, TIM23, HSP60, MDM38	527	234	5861	0.617858	1	1	100
UP_KEYWORDS	Mitochondrion inner membrane	9	1.70132	0.998794	P04037, P38988, Q06493, O74700, P07143, P87108, P16622, P32897, Q08179	COX4, GGC1, YLH47, TIM9, CYT1, TIM10, HEM15, TIM23, MDM38	529	208	5914	0.483732	1	0.999998	100
Annotation Cluster 52	Enrichment Score: 0.45091604620229947
Category	Term	Count	%	PValue	Genes/Uniprot	Gene Names	List Total	Pop Hits	Pop Total	Fold Enrichment	Bonferroni	Benjamini	FDR
UP_SEQ_FEATURE	metal ion-binding site:Iron (heme axial ligand)	4	0.756144	0.216232	P10614, P54781, P00431, P07143	ERG11, ERG5, CCP1, CYT1	529	18	5872	2.46671	1	0.996498	97.9807
UP_KEYWORDS	Heme	5	0.94518	0.381905	P10614, P54781, P00431, P07143, P32791	ERG11, ERG5, CCP1, CYT1, FRE1	529	35	5914	1.59708	1	0.839536	99.8077
GOTERM_MF_DIRECT	GO:0020037~heme binding	4	0.756144	0.537498	P10614, P54781, P00431, P07143	ERG11, ERG5, CCP1, CYT1	487	28	4885	1.43297	1	0.998625	99.9988
Annotation Cluster 53	Enrichment Score: 0.4476491486211174
Category	Term	Count	%	PValue	Genes/Uniprot	Gene Names	List Total	Pop Hits	Pop Total	Fold Enrichment	Bonferroni	Benjamini	FDR
GOTERM_BP_DIRECT	GO:0070478~nuclear-transcribed mRNA catabolic process, 3'-5' exonucleolytic nonsense-mediated decay	4	0.756144	0.205239	P35207, P53256, Q12277, P30771	SKI2, RRP46, RRP42, NAM7	517	17	5557	2.52907	1	0.943056	97.3444
GOTERM_BP_DIRECT	GO:0034427~nuclear-transcribed mRNA catabolic process, exonucleolytic, 3'-5'	3	0.567108	0.343488	P35207, P53256, Q12277	SKI2, RRP46, RRP42	517	13	5557	2.48043	1	0.987975	99.8702
GOTERM_BP_DIRECT	GO:0070481~nuclear-transcribed mRNA catabolic process, non-stop decay	3	0.567108	0.643991	P35207, P53256, Q12277	SKI2, RRP46, RRP42	517	23	5557	1.40198	1	0.999814	100
Annotation Cluster 54	Enrichment Score: 0.39580478607051955
Category	Term	Count	%	PValue	Genes/Uniprot	Gene Names	List Total	Pop Hits	Pop Total	Fold Enrichment	Bonferroni	Benjamini	FDR
UP_SEQ_FEATURE	metal ion-binding site:Manganese 1	3	0.567108	0.328878	Q00955, P03965, P00812	ACC1, CPA2, CAR1	529	13	5872	2.56158	1	0.999641	99.8318
UP_SEQ_FEATURE	metal ion-binding site:Manganese 2	3	0.567108	0.328878	Q00955, P03965, P00812	ACC1, CPA2, CAR1	529	13	5872	2.56158	1	0.999641	99.8318
UP_KEYWORDS	Manganese	6	1.13422	0.600505	P53043, Q00955, P03965, Q99258, P21954, P00812	PPT1, ACC1, CPA2, RIB3, IDP1, CAR1	529	58	5914	1.15651	1	0.937636	99.9993
Annotation Cluster 55	Enrichment Score: 0.3953683193282455
Category	Term	Count	%	PValue	Genes/Uniprot	Gene Names	List Total	Pop Hits	Pop Total	Fold Enrichment	Bonferroni	Benjamini	FDR
INTERPRO	IPR002553:Clathrin/coatomer adaptor, adaptin-like, N-terminal	3	0.567108	0.188399	Q12028, P36000, P46682	APL4, APL2, APL6	509	8	5053	3.72274	1	0.994302	96.4687
GOTERM_BP_DIRECT	GO:0006896~Golgi to vacuole transport	5	0.94518	0.217584	Q04338, Q12028, P36000, P24280, P46682	VTI1, APL4, APL2, SEC14, APL6	517	26	5557	2.06703	1	0.951354	97.9262
GOTERM_CC_DIRECT	GO:0030117~membrane coat	3	0.567108	0.328019	Q12028, P36000, P46682	APL4, APL2, APL6	527	13	5861	2.56649	1	0.921078	99.5235
GOTERM_BP_DIRECT	GO:0006886~intracellular protein transport	8	1.51229	0.800858	P40069, Q04338, Q12028, P32835, Q04175, P36000, P46682, P32897	KAP123, VTI1, APL4, GSP1, SXM1, APL2, APL6, TIM23	517	96	5557	0.895712	1	0.999993	100
GOTERM_BP_DIRECT	GO:0016192~vesicle-mediated transport	9	1.70132	0.979485	Q04338, Q12028, Q06631, P22214, P36000, P53600, P46682, P38968, P30619	VTI1, APL4, BFR2, SEC22, APL2, RET3, APL6, SEC31, SEC1	517	154	5557	0.628162	1	1	100
Annotation Cluster 56	Enrichment Score: 0.35895275962459977
Category	Term	Count	%	PValue	Genes/Uniprot	Gene Names	List Total	Pop Hits	Pop Total	Fold Enrichment	Bonferroni	Benjamini	FDR
INTERPRO	IPR001926:Tryptophan synthase beta subunit-like PLP-dependent enzymes superfamily	3	0.567108	0.188399	P00927, P32582, P16120	ILV1, CYS4, THR4	509	8	5053	3.72274	1	0.994302	96.4687
GOTERM_MF_DIRECT	GO:0030170~pyridoxal phosphate binding	7	1.32325	0.269919	P53090, P25045, P00927, P37292, P38891, P32582, P16120	ARO8, LCB1, ILV1, SHM1, BAT1, CYS4, THR4	487	44	4885	1.59581	1	0.971237	99.0019
UP_KEYWORDS	Pyridoxal phosphate	7	1.32325	0.416727	P53090, P25045, P00927, P37292, P38891, P32582, P16120	ARO8, LCB1, ILV1, SHM1, BAT1, CYS4, THR4	529	58	5914	1.34926	1	0.867293	99.9095
INTERPRO	IPR015421:Pyridoxal phosphate-dependent transferase, major region, subdomain 1	3	0.567108	0.870034	P53090, P25045, P37292	ARO8, LCB1, SHM1	509	34	5053	0.875939	1	1	100
INTERPRO	IPR015424:Pyridoxal phosphate-dependent transferase	3	0.567108	0.870034	P53090, P25045, P37292	ARO8, LCB1, SHM1	509	34	5053	0.875939	1	1	100
Annotation Cluster 57	Enrichment Score: 0.3559525931810024
Category	Term	Count	%	PValue	Genes/Uniprot	Gene Names	List Total	Pop Hits	Pop Total	Fold Enrichment	Bonferroni	Benjamini	FDR
UP_SEQ_FEATURE	transit peptide:Mitochondrion	35	6.61626	0.191721	Q05931, P00927, P21771, P37292, P38175, P31334, P10507, P06168, Q12166, Q08742, P04037, P12686, Q06493, P0CS90, Q12122, P07143, Q02784, P07342, P38523, P38891, P00431, P53881, P16622, Q03976, P21954, P51998, P25039, P53292, P25605, P15424, P28817, P19882, P36516, P19414, Q08179	SSQ1, ILV1, MRPS28, SHM1, MRP21, MRPL9, MAS1, ILV5, LEU9, RDL2, COX4, MRP13, YLH47, SSC1, LYS21, CYT1, GRX5, ILV2, MGE1, BAT1, CCP1, MRPL22, HEM15, RSM24, IDP1, YML6, MEF1, MRPS35, ILV6, MSS116, EHD3, HSP60, MRPL3, ACO1, MDM38	529	324	5872	1.19909	1	0.994852	96.6932
UP_KEYWORDS	Transit peptide	35	6.61626	0.457884	Q05931, P00927, P21771, P37292, P38175, P31334, P10507, P06168, Q12166, Q08742, P04037, P12686, Q06493, P0CS90, Q12122, P07143, Q02784, P07342, P38523, P38891, P00431, P53881, P16622, Q03976, P21954, P51998, P25039, P53292, P25605, P15424, P28817, P19882, P36516, P19414, Q08179	SSQ1, ILV1, MRPS28, SHM1, MRP21, MRPL9, MAS1, ILV5, LEU9, RDL2, COX4, MRP13, YLH47, SSC1, LYS21, CYT1, GRX5, ILV2, MGE1, BAT1, CCP1, MRPL22, HEM15, RSM24, IDP1, YML6, MEF1, MRPS35, ILV6, MSS116, EHD3, HSP60, MRPL3, ACO1, MDM38	529	370	5914	1.05753	1	0.895651	99.9651
UP_KEYWORDS	Mitochondrion	56	10.586	0.974357	P00927, P15108, P38988, P37292, P38175, P06168, P40202, P53297, Q06493, P07143, P20084, P35197, P46655, P42945, P38891, Q03976, P53292, P28817, P19414, Q12029, Q05931, Q06681, P21771, P31334, P10507, P35691, Q12117, Q12166, P26793, Q08742, P04037, P38910, P12686, P0CS90, Q12122, O74700, P32798, P32897, Q02784, P07342, P38523, P27692, P00431, P53881, P87108, Q03799, P16622, P21954, P51998, P25039,…	ILV1, HSC82, GGC1, SHM1, MRP21, ILV5, CCS1, PBP1, YLH47, CYT1, MRPL33, GCS1, GUS1, UTP10, BAT1, RSM24, MRPS35, EHD3, ACO1, FSF1, SSQ1, YSP2, MRPS28, MRPL9, MAS1, TMA19, MRH1, LEU9, RAD27, RDL2, COX4, HSP10, MRP13, SSC1, LYS21, TIM9, COT1, TIM23, GRX5, ILV2, MGE1, SPT5, CCP1, MRPL22, TIM10, MRPS8, HEM15, IDP1, YML6, MEF1, ILV6, MSS116, FKS1, HSP60, MRPL3, MDM38	529	768	5914	0.815178	1	0.999663	100
Annotation Cluster 58	Enrichment Score: 0.27454908833267083
Category	Term	Count	%	PValue	Genes/Uniprot	Gene Names	List Total	Pop Hits	Pop Total	Fold Enrichment	Bonferroni	Benjamini	FDR
GOTERM_BP_DIRECT	GO:0008654~phospholipid biosynthetic process	6	1.13422	0.312329	P13259, P05374, P53860, P38221, P28274, Q08548	PCT1, CHO2, PDR16, CDS1, URA7, ALE1	517	40	5557	1.61228	1	0.98427	99.73
UP_KEYWORDS	Phospholipid biosynthesis	4	0.756144	0.509273	P13259, P05374, P38221, Q08548	PCT1, CHO2, CDS1, ALE1	529	30	5914	1.49061	1	0.90473	99.9904
UP_KEYWORDS	Phospholipid metabolism	4	0.756144	0.575346	P13259, P05374, P38221, Q08548	PCT1, CHO2, CDS1, ALE1	529	33	5914	1.3551	1	0.934206	99.9985
KEGG_PATHWAY	sce00564:Glycerophospholipid metabolism	4	0.756144	0.871587	P13259, P05374, P38221, Q08548	PCT1, CHO2, CDS1, ALE1	282	37	2194	0.841096	1	0.986206	100
Annotation Cluster 59	Enrichment Score: 0.2487898422149246
Category	Term	Count	%	PValue	Genes/Uniprot	Gene Names	List Total	Pop Hits	Pop Total	Fold Enrichment	Bonferroni	Benjamini	FDR
GOTERM_CC_DIRECT	GO:0000139~Golgi membrane	14	2.6465	0.470409	Q04338, Q12028, P39106, Q04632, P32486, P22214, P32621, P24280, P53600, P38069, P53633, P38682, P23642, P38968	VTI1, APL4, MNN1, COG8, KRE6, SEC22, GDA1, SEC14, RET3, MNN2, YIP3, GLO3, VAN1, SEC31	527	138	5861	1.12826	1	0.978206	99.9806
UP_KEYWORDS	Golgi apparatus	18	3.40265	0.579568	Q04338, Q12028, P39106, P46682, Q12114, P46982, Q04632, P32486, P40529, P22214, P32621, P53600, P24280, P38069, P35197, P53633, P38682, P23642	VTI1, APL4, MNN1, APL6, CHS5, MNN5, COG8, KRE6, AGE2, SEC22, GDA1, RET3, SEC14, MNN2, GCS1, YIP3, GLO3, VAN1	529	195	5914	1.03196	1	0.93403	99.9987
GOTERM_CC_DIRECT	GO:0005794~Golgi apparatus	21	3.96975	0.657733	P13259, Q04338, Q12028, P29295, P39106, P46682, Q12114, P46982, Q04632, P32486, Q03455, P40529, P22214, P32621, P53600, P24280, P35197, P38069, P38682, P53633, P23642	PCT1, VTI1, APL4, HRR25, MNN1, APL6, CHS5, MNN5, COG8, KRE6, MSC2, AGE2, SEC22, GDA1, RET3, SEC14, GCS1, MNN2, GLO3, YIP3, VAN1	527	238	5861	0.981304	1	0.99693	99.9999
Annotation Cluster 60	Enrichment Score: 0.23525981599112733
Category	Term	Count	%	PValue	Genes/Uniprot	Gene Names	List Total	Pop Hits	Pop Total	Fold Enrichment	Bonferroni	Benjamini	FDR
UP_KEYWORDS	DNA replication	7	1.32325	0.574596	P38629, P21951, P29496, P10363, P26755, P26793, P21524	RFC3, POL2, MCM5, PRI1, RFA3, RAD27, RNR1	529	68	5914	1.15084	1	0.9361	99.9985
KEGG_PATHWAY	sce03030:DNA replication	5	0.94518	0.57515	P38629, P21951, P29496, P10363, P26793	RFC3, POL2, MCM5, PRI1, RAD27	282	31	2194	1.25486	1	0.904434	99.992
GOTERM_BP_DIRECT	GO:0006260~DNA replication	8	1.51229	0.595768	P38629, P21951, P29496, P10363, P26755, P39985, P26793, P21524	RFC3, POL2, MCM5, PRI1, RFA3, POL5, RAD27, RNR1	517	78	5557	1.10242	1	0.999587	99.9999
Annotation Cluster 61	Enrichment Score: 0.21501584972701834
Category	Term	Count	%	PValue	Genes/Uniprot	Gene Names	List Total	Pop Hits	Pop Total	Fold Enrichment	Bonferroni	Benjamini	FDR
GOTERM_MF_DIRECT	GO:0001075~transcription factor activity, RNA polymerase II core promoter sequence-specific binding involved in preinitiation complex assembly	3	0.567108	0.482736	P13393, P38129, Q05027	SPT15, TAF5, TAF9	487	16	4885	1.88078	1	0.997264	99.9936
GOTERM_CC_DIRECT	GO:0005669~transcription factor TFIID complex	3	0.567108	0.4896	P13393, P38129, Q05027	SPT15, TAF5, TAF9	527	18	5861	1.85357	1	0.981163	99.9882
GOTERM_BP_DIRECT	GO:0051123~RNA polymerase II transcriptional preinitiation complex assembly	4	0.756144	0.731971	P13393, P38129, P07273, Q05027	SPT15, TAF5, DST1, TAF9	517	40	5557	1.07485	1	0.999968	100
KEGG_PATHWAY	sce03022:Basal transcription factors	4	0.756144	0.797796	P13393, P38129, Q05027, Q01560	SPT15, TAF5, TAF9, NPL3	282	32	2194	0.972518	1	0.971807	100
Annotation Cluster 62	Enrichment Score: 0.20702675743114515
Category	Term	Count	%	PValue	Genes/Uniprot	Gene Names	List Total	Pop Hits	Pop Total	Fold Enrichment	Bonferroni	Benjamini	FDR
GOTERM_BP_DIRECT	GO:0016579~protein deubiquitination	4	0.756144	0.38787	Q01477, P53741, P25037, P38237	UBP3, BRE5, UBP1, UBP14	517	24	5557	1.79142	1	0.992901	99.957
INTERPRO	IPR018200:Peptidase C19, ubiquitin carboxyl-terminal hydrolase 2, conserved site	3	0.567108	0.488477	Q01477, P25037, P38237	UBP3, UBP1, UBP14	509	16	5053	1.86137	1	0.999997	99.9978
INTERPRO	IPR001394:Peptidase C19, ubiquitin carboxyl-terminal hydrolase 2	3	0.567108	0.521538	Q01477, P25037, P38237	UBP3, UBP1, UBP14	509	17	5053	1.75188	1	0.999999	99.9993
GOTERM_MF_DIRECT	GO:0036459~thiol-dependent ubiquitinyl hydrolase activity	3	0.567108	0.632937	Q01477, P25037, P38237	UBP3, UBP1, UBP14	487	21	4885	1.43297	1	0.999689	100
GOTERM_MF_DIRECT	GO:0004843~thiol-dependent ubiquitin-specific protease activity	3	0.567108	0.658549	Q01477, P25037, P38237	UBP3, UBP1, UBP14	487	22	4885	1.36784	1	0.999779	100
UP_KEYWORDS	Thiol protease	3	0.567108	0.727673	Q01477, P25037, P38237	UBP3, UBP1, UBP14	529	28	5914	1.19781	1	0.974483	100
GOTERM_MF_DIRECT	GO:0008234~cysteine-type peptidase activity	3	0.567108	0.829083	Q01477, P25037, P38237	UBP3, UBP1, UBP14	487	31	4885	0.970723	1	0.999997	100
GOTERM_BP_DIRECT	GO:0006511~ubiquitin-dependent protein catabolic process	5	0.94518	0.888151	Q01477, P33755, P25037, P35732, P38237	UBP3, NPL4, UBP1, DEF1, UBP14	517	68	5557	0.790335	1	1	100
Annotation Cluster 63	Enrichment Score: 0.20571263864141195
Category	Term	Count	%	PValue	Genes/Uniprot	Gene Names	List Total	Pop Hits	Pop Total	Fold Enrichment	Bonferroni	Benjamini	FDR
INTERPRO	IPR000182:GNAT domain	3	0.567108	0.454021	P53914, P07347, Q08689	KRE33, ARD1, NAT5	509	15	5053	1.98546	1	0.999991	99.9938
GOTERM_MF_DIRECT	GO:0008080~N-acetyltransferase activity	3	0.567108	0.482736	P53914, P07347, Q08689	KRE33, ARD1, NAT5	487	16	4885	1.88078	1	0.997264	99.9936
INTERPRO	IPR016181:Acyl-CoA N-acyltransferase	3	0.567108	0.664407	P07347, Q08689, P14743	ARD1, NAT5, NMT1	509	22	5053	1.35372	1	1	100
UP_KEYWORDS	Acyltransferase	6	1.13422	0.750182	P53914, P25045, P07347, Q08689, P14743, Q08548	KRE33, LCB1, ARD1, NAT5, NMT1, ALE1	529	69	5914	0.972138	1	0.979105	100
GOTERM_MF_DIRECT	GO:0016746~transferase activity, transferring acyl groups	6	1.13422	0.857137	P53914, P25045, P07347, Q08689, P14743, Q08548	KRE33, LCB1, ARD1, NAT5, NMT1, ALE1	487	72	4885	0.8359	1	0.999999	100
Annotation Cluster 64	Enrichment Score: 0.17477693140816725
Category	Term	Count	%	PValue	Genes/Uniprot	Gene Names	List Total	Pop Hits	Pop Total	Fold Enrichment	Bonferroni	Benjamini	FDR
UP_KEYWORDS	Exonuclease	4	0.756144	0.338263	Q03264, Q12149, P22147, P26793	NGL2, RRP6, XRN1, RAD27	529	23	5914	1.94428	1	0.801961	99.5333
GOTERM_MF_DIRECT	GO:0004527~exonuclease activity	4	0.756144	0.404861	Q03264, Q12149, P22147, P26793	NGL2, RRP6, XRN1, RAD27	487	23	4885	1.74449	1	0.992993	99.9499
UP_KEYWORDS	Nuclease	5	0.94518	0.987496	Q03264, Q12149, P22147, P47100, P26793	NGL2, RRP6, XRN1, TY1B-JR2, RAD27	529	105	5914	0.532361	1	0.999917	100
GOTERM_BP_DIRECT	GO:0090305~nucleic acid phosphodiester bond hydrolysis	5	0.94518	0.992024	Q03264, P21951, P22147, P47100, P26793	NGL2, POL2, XRN1, TY1B-JR2, RAD27	517	107	5557	0.502269	1	1	100
GOTERM_MF_DIRECT	GO:0004518~nuclease activity	5	0.94518	0.996548	Q03264, Q12149, P22147, P47100, P26793	NGL2, RRP6, XRN1, TY1B-JR2, RAD27	487	110	4885	0.455945	1	1	100
Annotation Cluster 65	Enrichment Score: 0.1679780060500181
Category	Term	Count	%	PValue	Genes/Uniprot	Gene Names	List Total	Pop Hits	Pop Total	Fold Enrichment	Bonferroni	Benjamini	FDR
UP_KEYWORDS	SH3 domain	3	0.567108	0.621751	P38822, Q07533, P53281	BZZ1, CYK3, LSB1	529	23	5914	1.45821	1	0.945253	99.9997
INTERPRO	IPR001452:Src homology-3 domain	3	0.567108	0.688482	P38822, Q07533, P53281	BZZ1, CYK3, LSB1	509	23	5053	1.29487	1	1	100
SMART	SM00326:SH3	3	0.567108	0.732077	P38822, Q07533, P53281	BZZ1, CYK3, LSB1	194	23	1776	1.19408	1	1	100
Annotation Cluster 66	Enrichment Score: 0.16402654597639982
Category	Term	Count	%	PValue	Genes/Uniprot	Gene Names	List Total	Pop Hits	Pop Total	Fold Enrichment	Bonferroni	Benjamini	FDR
GOTERM_CC_DIRECT	GO:0000221~vacuolar proton-transporting V-type ATPase, V1 domain	3	0.567108	0.156862	P48836, P16140, P22203	VMA10, VMA2, VMA4	527	8	5861	4.17054	1	0.728168	89.9218
GOTERM_MF_DIRECT	GO:0046961~proton-transporting ATPase activity, rotational mechanism	3	0.567108	0.632937	P48836, P16140, P22203	VMA10, VMA2, VMA4	487	21	4885	1.43297	1	0.999689	100
GOTERM_BP_DIRECT	GO:0015992~proton transport	7	1.32325	0.720887	P32466, P32465, Q06493, P48836, P16140, P22203, Q08179	HXT3, HXT1, YLH47, VMA10, VMA2, VMA4, MDM38	517	76	5557	0.989998	1	0.999968	100
GOTERM_BP_DIRECT	GO:0007035~vacuolar acidification	3	0.567108	0.729783	P48836, P16140, P22203	VMA10, VMA2, VMA4	517	27	5557	1.19428	1	0.999968	100
UP_KEYWORDS	Hydrogen ion transport	3	0.567108	0.844571	P48836, P16140, P22203	VMA10, VMA2, VMA4	529	36	5914	0.931632	1	0.992305	100
KEGG_PATHWAY	sce04145:Phagosome	4	0.756144	0.859061	P22214, P48836, P16140, P22203	SEC22, VMA10, VMA2, VMA4	282	36	2194	0.86446	1	0.984703	100
GOTERM_BP_DIRECT	GO:0006811~ion transport	8	1.51229	0.934966	Q12029, Q03455, P32802, Q12117, P48836, P16140, P22203, P32791	FSF1, MSC2, EMP70, MRH1, VMA10, VMA2, VMA4, FRE1	517	119	5557	0.722592	1	1	100
UP_KEYWORDS	Ion transport	7	1.32325	0.95432	Q12029, Q03455, P32802, P48836, P16140, P22203, P32791	FSF1, MSC2, EMP70, VMA10, VMA2, VMA4, FRE1	529	116	5914	0.67463	1	0.999375	100
KEGG_PATHWAY	sce00190:Oxidative phosphorylation	5	0.94518	0.987808	P04037, P07143, P48836, P16140, P22203	COX4, CYT1, VMA10, VMA2, VMA4	282	72	2194	0.540288	1	0.99975	100
Annotation Cluster 67	Enrichment Score: 0.16061360374595546
Category	Term	Count	%	PValue	Genes/Uniprot	Gene Names	List Total	Pop Hits	Pop Total	Fold Enrichment	Bonferroni	Benjamini	FDR
UP_KEYWORDS	Metalloprotease	5	0.94518	0.339886	P38821, Q03862, P38149, P10507, P37898	APE4, ARX1, DUG2, MAS1, AAP1	529	33	5914	1.69388	1	0.798882	99.5479
GOTERM_MF_DIRECT	GO:0008237~metallopeptidase activity	5	0.94518	0.509858	P38821, Q03862, P38149, P10507, P37898	APE4, ARX1, DUG2, MAS1, AAP1	487	37	4885	1.35551	1	0.997944	99.9971
UP_KEYWORDS	Protease	10	1.89036	0.935232	Q01477, P38821, Q03862, P38149, P53920, P10507, P47100, P37898, P25037, P38237	UBP3, APE4, ARX1, DUG2, NMA111, MAS1, TY1B-JR2, AAP1, UBP1, UBP14	529	152	5914	0.735499	1	0.998647	100
GOTERM_MF_DIRECT	GO:0008233~peptidase activity	10	1.89036	0.984137	Q01477, P38821, Q03862, P38149, P53920, P10507, P47100, P37898, P25037, P38237	UBP3, APE4, ARX1, DUG2, NMA111, MAS1, TY1B-JR2, AAP1, UBP1, UBP14	487	161	4885	0.623031	1	1	100
GOTERM_BP_DIRECT	GO:0006508~proteolysis	10	1.89036	0.986676	Q01477, P38821, Q03862, P38149, P53920, P10507, P47100, P37898, P25037, P38237	UBP3, APE4, ARX1, DUG2, NMA111, MAS1, TY1B-JR2, AAP1, UBP1, UBP14	517	176	5557	0.610713	1	1	100
Annotation Cluster 68	Enrichment Score: 0.15300191436642324
Category	Term	Count	%	PValue	Genes/Uniprot	Gene Names	List Total	Pop Hits	Pop Total	Fold Enrichment	Bonferroni	Benjamini	FDR
GOTERM_CC_DIRECT	GO:0016586~RSC complex	3	0.567108	0.518966	P38781, Q02206, Q05123	RSC30, RSC4, ARP9	527	19	5861	1.75602	1	0.985619	99.9947
GOTERM_BP_DIRECT	GO:0006337~nucleosome disassembly	3	0.567108	0.566482	P38781, Q02206, Q05123	RSC30, RSC4, ARP9	517	20	5557	1.61228	1	0.999336	99.9998
GOTERM_BP_DIRECT	GO:0006368~transcription elongation from RNA polymerase II promoter	6	1.13422	0.571516	P38781, P25655, Q12514, P07273, Q02206, Q05123	RSC30, CDC39, NOT5, DST1, RSC4, ARP9	517	54	5557	1.19428	1	0.999361	99.9998
GOTERM_BP_DIRECT	GO:0043044~ATP-dependent chromatin remodeling	3	0.567108	0.667275	P38781, Q02206, Q05123	RSC30, RSC4, ARP9	517	24	5557	1.34357	1	0.999886	100
GOTERM_MF_DIRECT	GO:0015616~DNA translocase activity	3	0.567108	0.814852	P38781, Q02206, Q05123	RSC30, RSC4, ARP9	487	30	4885	1.00308	1	0.999996	100
UP_KEYWORDS	Chromatin regulator	6	1.13422	0.959522	P38781, Q03940, P38429, Q06623, Q02206, Q05123	RSC30, RVB1, SAP30, HDA3, RSC4, ARP9	529	103	5914	0.651238	1	0.99942	100
GOTERM_BP_DIRECT	GO:0016569~covalent chromatin modification	6	1.13422	0.968714	P38781, Q03940, P38429, Q06623, Q02206, Q05123	RSC30, RVB1, SAP30, HDA3, RSC4, ARP9	517	103	5557	0.626129	1	1	100
Annotation Cluster 69	Enrichment Score: 0.14446392234628797
Category	Term	Count	%	PValue	Genes/Uniprot	Gene Names	List Total	Pop Hits	Pop Total	Fold Enrichment	Bonferroni	Benjamini	FDR
INTERPRO	IPR001849:Pleckstrin homology domain	4	0.756144	0.544877	Q00402, Q06315, P39960, P48562	NUM1, SKG3, BEM2, CLA4	509	28	5053	1.41819	1	0.999999	99.9997
UP_SEQ_FEATURE	domain:PH	3	0.567108	0.712572	Q00402, P39960, P48562	NUM1, BEM2, CLA4	529	27	5872	1.23335	1	1	100
INTERPRO	IPR011993:Pleckstrin homology-like domain	3	0.567108	0.949469	Q00402, P39960, P48562	NUM1, BEM2, CLA4	509	45	5053	0.661821	1	1	100
Annotation Cluster 70	Enrichment Score: 0.13578774201163568
Category	Term	Count	%	PValue	Genes/Uniprot	Gene Names	List Total	Pop Hits	Pop Total	Fold Enrichment	Bonferroni	Benjamini	FDR
UP_KEYWORDS	Cytoplasmic vesicle	5	0.94518	0.59779	Q12028, P38221, P53600, P46682, P38968	APL4, CDS1, RET3, APL6, SEC31	529	46	5914	1.21517	1	0.938448	99.9993
GOTERM_CC_DIRECT	GO:0031410~cytoplasmic vesicle	5	0.94518	0.668483	Q12028, P38221, P53600, P46682, P38968	APL4, CDS1, RET3, APL6, SEC31	527	50	5861	1.11214	1	0.997141	100
GOTERM_BP_DIRECT	GO:0016192~vesicle-mediated transport	9	1.70132	0.979485	Q04338, Q12028, Q06631, P22214, P36000, P53600, P46682, P38968, P30619	VTI1, APL4, BFR2, SEC22, APL2, RET3, APL6, SEC31, SEC1	517	154	5557	0.628162	1	1	100
Annotation Cluster 71	Enrichment Score: 0.12686892914613943
Category	Term	Count	%	PValue	Genes/Uniprot	Gene Names	List Total	Pop Hits	Pop Total	Fold Enrichment	Bonferroni	Benjamini	FDR
UP_SEQ_FEATURE	binding site:ATP	19	3.59168	0.181855	P38629, Q12236, P15108, Q03497, P53599, P09436, P53852, P29295, P32528, P26637, Q08732, P10659, P19358, P11792, P04807, P13188, P46655, P23292, P48562	RFC3, PKH2, HSC82, STE20, SSK2, ILS1, YNL247W, HRR25, DUR1,2, CDC60, HRK1, SAM1, SAM2, SCH9, HXK2, GLN4, GUS1, YCK2, CLA4	529	159	5872	1.32644	1	0.994483	95.9839
GOTERM_BP_DIRECT	GO:0018105~peptidyl-serine phosphorylation	5	0.94518	0.345776	P43639, Q12236, P11792, P29295, P23292	CKB1, PKH2, SCH9, HRR25, YCK2	517	32	5557	1.67946	1	0.987857	99.8772
UP_KEYWORDS	Kinase	18	3.40265	0.663957	P47143, Q06685, Q12236, Q03497, P53599, P38689, P29295, Q08732, P17423, P10869, P11792, P04807, P32264, Q12265, Q04430, P23292, P32895, P48562	ADO1, VIP1, PKH2, STE20, SSK2, PRS3, HRR25, HRK1, THR1, HOM3, SCH9, HXK2, PRO1, PRS5, CAB1, YCK2, PRS1, CLA4	529	205	5914	0.981622	1	0.95853	99.9999
GOTERM_BP_DIRECT	GO:0016310~phosphorylation	18	3.40265	0.775237	P47143, Q06685, Q12236, Q03497, P53599, P38689, P29295, Q08732, P17423, P10869, P11792, P04807, P32264, Q12265, Q04430, P23292, P32895, P48562	ADO1, VIP1, PKH2, STE20, SSK2, PRS3, HRR25, HRK1, THR1, HOM3, SCH9, HXK2, PRO1, PRS5, CAB1, YCK2, PRS1, CLA4	517	212	5557	0.912613	1	0.999987	100
UP_SEQ_FEATURE	active site:Proton acceptor	16	3.02457	0.782739	Q12236, Q03497, P53599, P29295, P00431, P10507, Q08732, P54115, P11792, P38149, P40579, P53686, P22133, P23292, P21524, P48562	PKH2, STE20, SSK2, HRR25, CCP1, MAS1, HRK1, ALD6, SCH9, DUG2, YIR035C, HST2, MDH2, YCK2, RNR1, CLA4	529	196	5872	0.906138	1	1	100
GOTERM_MF_DIRECT	GO:0016301~kinase activity	18	3.40265	0.834196	P47143, Q06685, Q12236, Q03497, P53599, P38689, P29295, Q08732, P17423, P10869, P11792, P04807, P32264, Q12265, Q04430, P23292, P32895, P48562	ADO1, VIP1, PKH2, STE20, SSK2, PRS3, HRR25, HRK1, THR1, HOM3, SCH9, HXK2, PRO1, PRS5, CAB1, YCK2, PRS1, CLA4	487	207	4885	0.872244	1	0.999997	100
UP_SEQ_FEATURE	domain:Protein kinase	9	1.70132	0.851389	P53009, Q12236, Q03497, P53599, P11792, P29295, Q08732, P23292, P48562	SCY1, PKH2, STE20, SSK2, SCH9, HRR25, HRK1, YCK2, CLA4	529	119	5872	0.83951	1	1	100
INTERPRO	IPR017441:Protein kinase, ATP binding site	7	1.32325	0.883289	Q12236, Q03497, P53599, P11792, P29295, Q08732, P23292	PKH2, STE20, SSK2, SCH9, HRR25, HRK1, YCK2	509	87	5053	0.798749	1	1	100
GOTERM_BP_DIRECT	GO:0006468~protein phosphorylation	10	1.89036	0.88675	P53009, P43639, Q12236, Q03497, P53599, P11792, P29295, Q08732, P23292, P48562	SCY1, CKB1, PKH2, STE20, SSK2, SCH9, HRR25, HRK1, YCK2, CLA4	517	134	5557	0.802131	1	1	100
INTERPRO	IPR000719:Protein kinase, catalytic domain	9	1.70132	0.9139	P53009, Q12236, Q03497, P53599, P11792, P29295, Q08732, P23292, P48562	SCY1, PKH2, STE20, SSK2, SCH9, HRR25, HRK1, YCK2, CLA4	509	117	5053	0.763639	1	1	100
UP_KEYWORDS	Serine/threonine-protein kinase	8	1.51229	0.928444	Q12236, Q03497, P53599, P11792, P29295, Q08732, P23292, P48562	PKH2, STE20, SSK2, SCH9, HRR25, HRK1, YCK2, CLA4	529	122	5914	0.733087	1	0.998382	100
SMART	SM00220:S_TKc	9	1.70132	0.939387	P53009, Q12236, Q03497, P53599, P11792, P29295, Q08732, P23292, P48562	SCY1, PKH2, STE20, SSK2, SCH9, HRR25, HRK1, YCK2, CLA4	194	113	1776	0.729131	1	1	100
INTERPRO	IPR008271:Serine/threonine-protein kinase, active site	8	1.51229	0.939708	Q12236, Q03497, P53599, P11792, P29295, Q08732, P23292, P48562	PKH2, STE20, SSK2, SCH9, HRR25, HRK1, YCK2, CLA4	509	111	5053	0.715482	1	1	100
GOTERM_MF_DIRECT	GO:0004672~protein kinase activity	9	1.70132	0.946407	P53009, Q12236, Q03497, P53599, P11792, P29295, Q08732, P23292, P48562	SCY1, PKH2, STE20, SSK2, SCH9, HRR25, HRK1, YCK2, CLA4	487	127	4885	0.710844	1	1	100
GOTERM_MF_DIRECT	GO:0004674~protein serine/threonine kinase activity	8	1.51229	0.966385	Q12236, Q03497, P53599, P11792, P29295, Q08732, P23292, P48562	PKH2, STE20, SSK2, SCH9, HRR25, HRK1, YCK2, CLA4	487	122	4885	0.657757	1	1	100
INTERPRO	IPR011009:Protein kinase-like domain	9	1.70132	0.966867	P53009, Q12236, Q03497, P53599, P11792, P29295, Q08732, P23292, P48562	SCY1, PKH2, STE20, SSK2, SCH9, HRR25, HRK1, YCK2, CLA4	509	134	5053	0.66676	1	1	100
Annotation Cluster 72	Enrichment Score: 0.11097869119173116
Category	Term	Count	%	PValue	Genes/Uniprot	Gene Names	List Total	Pop Hits	Pop Total	Fold Enrichment	Bonferroni	Benjamini	FDR
UP_KEYWORDS	Protein transport	35	6.61626	0.581305	Q04338, P53145, Q12028, P49687, P52593, P46682, Q12114, P40368, Q06706, P34078, P20449, Q04175, P38181, O74700, P53600, P35197, P38682, P32897, P30619, P40069, P53903, P32835, P33755, P25303, Q06631, P40064, P36000, P25491, P87108, P20676, Q04632, P22214, P24280, Q12445, P38968	VTI1, LSG1, APL4, NUP145, NUP188, APL6, CHS5, NUP82, IKI3, LTV1, DBP5, SXM1, NUP170, TIM9, RET3, GCS1, GLO3, TIM23, SEC1, KAP123, PGA2, GSP1, NPL4, SCJ1, BFR2, NUP157, APL2, YDJ1, TIM10, NUP1, COG8, SEC22, SEC14, POM34, SEC31	529	389	5914	1.00588	1	0.932648	99.9988
GOTERM_BP_DIRECT	GO:0015031~protein transport	36	6.80529	0.620726	Q04338, P53145, Q12028, P49687, P52593, P46682, Q12114, P40368, Q06706, P34078, P20449, Q04175, P38181, O74700, P53600, P35197, P38682, P32897, P30619, P40069, P53903, P32835, P33755, P25303, Q06631, P40064, P36000, P25491, P87108, P20676, Q12746, Q04632, P22214, P24280, Q12445, P38968	VTI1, LSG1, APL4, NUP145, NUP188, APL6, CHS5, NUP82, IKI3, LTV1, DBP5, SXM1, NUP170, TIM9, RET3, GCS1, GLO3, TIM23, SEC1, KAP123, PGA2, GSP1, NPL4, SCJ1, BFR2, NUP157, APL2, YDJ1, TIM10, NUP1, PGA3, COG8, SEC22, SEC14, POM34, SEC31	517	391	5557	0.989636	1	0.999706	100
UP_KEYWORDS	Transport	56	10.586	0.998208	P49687, P38988, P52593, P48836, P34232, Q04175, P38181, P07143, P35197, P38682, Q08972, P30619, P39517, P40069, P53860, Q06631, P40064, P36000, Q04632, P33302, P22214, P24280, Q12029, P53145, Q04338, Q12028, P32802, P46682, Q12114, P40368, Q06706, P34078, P38758, P32466, Q03455, P20449, P32465, O74700, P32798, P53600, P32897, P43586, P22203, P32791, P53903, P32835, P33755, P46956, P25303, P87108,…	NUP145, GGC1, NUP188, VMA10, MTR2, SXM1, NUP170, CYT1, GCS1, GLO3, NEW1, SEC1, DHH1, KAP123, PDR16, BFR2, NUP157, APL2, COG8, PDR5, SEC22, SEC14, FSF1, LSG1, VTI1, APL4, EMP70, APL6, CHS5, NUP82, IKI3, LTV1, TDA3, HXT3, MSC2, DBP5, HXT1, TIM9, COT1, RET3, TIM23, LOC1, VMA4, FRE1, PGA2, GSP1, NPL4, PHO86, SCJ1, TIM10, YDJ1, NUP1, PAB1, VMA2, POM34, SEC31	529	853	5914	0.733947	1	0.999997	100
GOTERM_BP_DIRECT	GO:0006810~transport	55	10.397	0.998987	P49687, P38988, P52593, P48836, P34232, Q04175, P38181, P35197, P38682, Q08972, P30619, P39517, P40069, P53860, Q06631, P40064, P36000, Q04632, P33302, P22214, P24280, Q12029, P53145, Q04338, Q12028, P32802, P46682, Q12114, P40368, Q06706, P34078, P38758, P32466, Q03455, P20449, P32465, O74700, P32798, P53600, P32897, P43586, P22203, P53903, P32835, P33755, P46956, P25303, P53741, P87108, P25491,…	NUP145, GGC1, NUP188, VMA10, MTR2, SXM1, NUP170, GCS1, GLO3, NEW1, SEC1, DHH1, KAP123, PDR16, BFR2, NUP157, APL2, COG8, PDR5, SEC22, SEC14, FSF1, LSG1, VTI1, APL4, EMP70, APL6, CHS5, NUP82, IKI3, LTV1, TDA3, HXT3, MSC2, DBP5, HXT1, TIM9, COT1, RET3, TIM23, LOC1, VMA4, PGA2, GSP1, NPL4, PHO86, SCJ1, BRE5, TIM10, YDJ1, NUP1, PAB1, VMA2, POM34, SEC31	517	822	5557	0.719185	1	1	100
Annotation Cluster 73	Enrichment Score: 0.10172868017049255
Category	Term	Count	%	PValue	Genes/Uniprot	Gene Names	List Total	Pop Hits	Pop Total	Fold Enrichment	Bonferroni	Benjamini	FDR
UP_KEYWORDS	Tricarboxylic acid cycle	3	0.567108	0.667526	P21954, P22133, P19414	IDP1, MDH2, ACO1	529	25	5914	1.34155	1	0.95829	99.9999
GOTERM_BP_DIRECT	GO:0006099~tricarboxylic acid cycle	3	0.567108	0.797385	P21954, P22133, P19414	IDP1, MDH2, ACO1	517	31	5557	1.04018	1	0.999993	100
KEGG_PATHWAY	sce00020:Citrate cycle (TCA cycle)	3	0.567108	0.930417	P21954, P22133, P19414	IDP1, MDH2, ACO1	282	32	2194	0.729388	1	0.995677	100
Annotation Cluster 74	Enrichment Score: 0.09106599772097933
Category	Term	Count	%	PValue	Genes/Uniprot	Gene Names	List Total	Pop Hits	Pop Total	Fold Enrichment	Bonferroni	Benjamini	FDR
GOTERM_CC_DIRECT	GO:0034990~nuclear mitotic cohesin complex	3	0.567108	0.0945961	P47037, P32908, P40541	SMC3, SMC1, IRR1	527	6	5861	5.56072	1	0.549565	73.7243
UP_KEYWORDS	Centromere	4	0.756144	0.887981	P32914, P33322, P69850, P40541	SPT4, CBF5, DAD3, IRR1	529	56	5914	0.798542	1	0.996113	100
GOTERM_CC_DIRECT	GO:0000775~chromosome, centromeric region	5	0.94518	0.903917	P32914, P29295, P33322, P69850, P40541	SPT4, HRR25, CBF5, DAD3, IRR1	527	73	5861	0.761743	1	0.999972	100
UP_KEYWORDS	Chromosome	8	1.51229	0.955049	P47037, P32914, P32908, P33322, P25454, P35732, P69850, P40541	SMC3, SPT4, SMC1, CBF5, RAD51, DEF1, DAD3, IRR1	529	131	5914	0.682723	1	0.999355	100
GOTERM_CC_DIRECT	GO:0005694~chromosome	8	1.51229	0.956696	P47037, P32914, P32908, P33322, P25454, P35732, P69850, P40541	SMC3, SPT4, SMC1, CBF5, RAD51, DEF1, DAD3, IRR1	527	131	5861	0.679172	1	0.999998	100
UP_KEYWORDS	Mitosis	7	1.32325	0.972666	P47037, P32908, P33322, Q00684, P50623, P69850, P40541	SMC3, SMC1, CBF5, CDC14, UBC9, DAD3, IRR1	529	125	5914	0.626057	1	0.999663	100
GOTERM_BP_DIRECT	GO:0007067~mitotic nuclear division	7	1.32325	0.986198	P47037, P32908, P33322, Q00684, P50623, P69850, P40541	SMC3, SMC1, CBF5, CDC14, UBC9, DAD3, IRR1	517	131	5557	0.57435	1	1	100
UP_KEYWORDS	Cell division	10	1.89036	0.993439	P47037, P20486, P32908, P33322, Q07533, P40986, Q00684, P50623, P69850, P40541	SMC3, CKS1, SMC1, CBF5, CYK3, CDC1, CDC14, UBC9, DAD3, IRR1	529	196	5914	0.570387	1	0.999975	100
GOTERM_BP_DIRECT	GO:0051301~cell division	10	1.89036	0.996136	P47037, P20486, P32908, P33322, Q07533, P40986, Q00684, P50623, P69850, P40541	SMC3, CKS1, SMC1, CBF5, CYK3, CDC1, CDC14, UBC9, DAD3, IRR1	517	197	5557	0.545612	1	1	100
UP_KEYWORDS	Cell cycle	16	3.02457	0.997942	P38629, Q03497, P40856, P32908, Q07533, P47069, P40986, Q00684, P50623, P69850, P47037, P29496, P20486, P33322, P34761, P40541	RFC3, STE20, SAP185, SMC1, CYK3, MPS3, CDC1, CDC14, UBC9, DAD3, SMC3, MCM5, CKS1, CBF5, WHI3, IRR1	529	308	5914	0.580758	1	0.999996	100
KEGG_PATHWAY	sce04113:Meiosis - yeast	8	1.51229	0.998181	P47037, P29496, P32466, P32465, P46676, P32908, Q00684, P40541	SMC3, MCM5, HXT3, HXT1, SUM1, SMC1, CDC14, IRR1	282	126	2194	0.493977	1	0.999984	100
GOTERM_BP_DIRECT	GO:0007049~cell cycle	16	3.02457	0.999069	P38629, Q03497, P40856, P32908, Q07533, P47069, P40986, Q00684, P50623, P69850, P47037, P29496, P20486, P33322, P34761, P40541	RFC3, STE20, SAP185, SMC1, CYK3, MPS3, CDC1, CDC14, UBC9, DAD3, SMC3, MCM5, CKS1, CBF5, WHI3, IRR1	517	310	5557	0.554764	1	1	100
KEGG_PATHWAY	sce04111:Cell cycle - yeast	7	1.32325	0.99917	P47037, P29496, P20486, P32908, Q00684, P40541, P48743	SMC3, MCM5, CKS1, SMC1, CDC14, IRR1, RFX1	282	122	2194	0.446402	1	0.999995	100
Annotation Cluster 75	Enrichment Score: 0.04250957699433528
Category	Term	Count	%	PValue	Genes/Uniprot	Gene Names	List Total	Pop Hits	Pop Total	Fold Enrichment	Bonferroni	Benjamini	FDR
GOTERM_BP_DIRECT	GO:0006470~protein dephosphorylation	4	0.756144	0.881996	P53043, P42937, Q00684, P11491	PPT1, YCH1, CDC14, PHO8	517	53	5557	0.811211	1	1	100
UP_KEYWORDS	Protein phosphatase	3	0.567108	0.89233	P53043, P42937, Q00684	PPT1, YCH1, CDC14	529	41	5914	0.818018	1	0.996068	100
GOTERM_MF_DIRECT	GO:0004721~phosphoprotein phosphatase activity	3	0.567108	0.947281	P53043, P42937, Q00684	PPT1, YCH1, CDC14	487	45	4885	0.66872	1	1	100
Annotation Cluster 76	Enrichment Score: 0.032306154409871383
Category	Term	Count	%	PValue	Genes/Uniprot	Gene Names	List Total	Pop Hits	Pop Total	Fold Enrichment	Bonferroni	Benjamini	FDR
UP_KEYWORDS	Transcription	43	8.12854	0.815622	P38781, P25441, P39521, P25339, P32389, Q02206, P54000, P22276, Q06706, P13393, P53276, Q12159, P25655, P38429, P46676, P38129, Q08421, Q12514, O14467, P53686, Q06679, P10363, P32914, P42945, P04050, P27692, P04051, P07703, Q05123, P34253, P36121, Q03940, P34909, P28000, P06102, P07273, Q06623, P40422, P20433, Q05027, P22139, P20434, P46669	RSC30, RPC53, FHL1, PUF4, MET4, RSC4, SUB1, RET1, IKI3, SPT15, UTP8, YRA1, CDC39, SAP30, SUM1, TAF5, ETT1, NOT5, MBF1, HST2, UTP4, PRI1, SPT4, UTP10, RPO21, SPT5, RPO31, RPC40, ARP9, KTI12, RPC37, RVB1, MOT2, RPC19, NOT3, DST1, HDA3, RPC10, RPB4, TAF9, RPB10, RPB5, RPA43	529	528	5914	0.910459	1	0.989053	100
GOTERM_BP_DIRECT	GO:0006351~transcription, DNA-templated	42	7.93951	0.910819	P38781, P39521, P25339, P32389, Q02206, P54000, P22276, Q06706, P13393, P53276, Q12159, P25655, P38429, P46676, P38129, Q08421, Q12514, O14467, P39985, P53686, Q06679, P32914, P42945, P04050, P27692, P04051, P07703, Q05123, P34253, P36121, Q03940, P34909, P28000, P06102, P07273, Q06623, P40422, P20433, Q05027, P22139, P20434, P46669	RSC30, FHL1, PUF4, MET4, RSC4, SUB1, RET1, IKI3, SPT15, UTP8, YRA1, CDC39, SAP30, SUM1, TAF5, ETT1, NOT5, MBF1, POL5, HST2, UTP4, SPT4, UTP10, RPO21, SPT5, RPO31, RPC40, ARP9, KTI12, RPC37, RVB1, MOT2, RPC19, NOT3, DST1, HDA3, RPC10, RPB4, TAF9, RPB10, RPB5, RPA43	517	527	5557	0.856621	1	1	100
GOTERM_BP_DIRECT	GO:0006355~regulation of transcription, DNA-templated	28	5.29301	0.999811	P38781, P39521, P32389, P25339, Q02206, Q12114, P54000, Q06706, Q12159, P25655, P38429, P46676, P38129, Q08421, Q12514, O14467, P53686, P32914, P27692, Q05123, P34253, P48743, Q03940, P34909, P06102, P07273, Q06623, Q05027	RSC30, FHL1, MET4, PUF4, RSC4, CHS5, SUB1, IKI3, YRA1, CDC39, SAP30, SUM1, TAF5, ETT1, NOT5, MBF1, HST2, SPT4, SPT5, ARP9, KTI12, RFX1, RVB1, MOT2, NOT3, DST1, HDA3, TAF9	517	509	5557	0.591276	1	1	100
UP_KEYWORDS	Transcription regulation	24	4.53686	0.999854	P38781, P39521, P32389, P25339, Q02206, Q05123, P54000, P34253, Q06706, Q12159, Q03940, P34909, P25655, P38429, P06102, P46676, P38129, O14467, Q08421, Q12514, P07273, Q06623, Q05027, P53686	RSC30, FHL1, MET4, PUF4, RSC4, ARP9, SUB1, KTI12, IKI3, YRA1, RVB1, MOT2, CDC39, SAP30, NOT3, SUM1, TAF5, MBF1, ETT1, NOT5, DST1, HDA3, TAF9, HST2	529	477	5914	0.562495	1	1	100
Annotation Cluster 77	Enrichment Score: 0.03225862228357437
Category	Term	Count	%	PValue	Genes/Uniprot	Gene Names	List Total	Pop Hits	Pop Total	Fold Enrichment	Bonferroni	Benjamini	FDR
UP_SEQ_FEATURE	topological domain:Mitochondrial matrix	3	0.567108	0.836036	Q06493, P32897, Q08179	YLH47, TIM23, MDM38	529	35	5872	0.951445	1	1	100
UP_SEQ_FEATURE	topological domain:Mitochondrial intermembrane	3	0.567108	0.958348	Q06493, P32897, Q08179	YLH47, TIM23, MDM38	529	53	5872	0.628313	1	1	100
UP_KEYWORDS	Mitochondrion inner membrane	9	1.70132	0.998794	P04037, P38988, Q06493, O74700, P07143, P87108, P16622, P32897, Q08179	COX4, GGC1, YLH47, TIM9, CYT1, TIM10, HEM15, TIM23, MDM38	529	208	5914	0.483732	1	0.999998	100
Annotation Cluster 78	Enrichment Score: 0.02027893560571264
Category	Term	Count	%	PValue	Genes/Uniprot	Gene Names	List Total	Pop Hits	Pop Total	Fold Enrichment	Bonferroni	Benjamini	FDR
UP_KEYWORDS	mRNA processing	12	2.26843	0.891733	P53131, Q08647, P38768, P32914, P25298, P27692, P15424, P20433, P04147, P36048, P43321, P39517	PRP43, PUS7, PIH1, SPT4, RNA14, SPT5, MSS116, RPB4, PAB1, SNU114, SMD3, DHH1	529	167	5914	0.803323	1	0.996228	100
GOTERM_BP_DIRECT	GO:0006397~mRNA processing	12	2.26843	0.939981	P53131, Q08647, P38768, P32914, P25298, P27692, P15424, P20433, P04147, P36048, P43321, P39517	PRP43, PUS7, PIH1, SPT4, RNA14, SPT5, MSS116, RPB4, PAB1, SNU114, SMD3, DHH1	517	174	5557	0.741279	1	1	100
UP_KEYWORDS	mRNA splicing	6	1.13422	0.968213	P53131, Q08647, P38768, P15424, P36048, P43321	PRP43, PUS7, PIH1, MSS116, SNU114, SMD3	529	107	5914	0.626893	1	0.99959	100
GOTERM_BP_DIRECT	GO:0008380~RNA splicing	6	1.13422	0.981383	P53131, Q08647, P38768, P15424, P36048, P43321	PRP43, PUS7, PIH1, MSS116, SNU114, SMD3	517	111	5557	0.581003	1	1	100
KEGG_PATHWAY	sce03040:Spliceosome	5	0.94518	0.994128	P53131, Q12159, P10592, P36048, P43321	PRP43, YRA1, SSA2, SNU114, SMD3	282	79	2194	0.492414	1	0.999909	100
Annotation Cluster 79	Enrichment Score: 0.019701174668233817
Category	Term	Count	%	PValue	Genes/Uniprot	Gene Names	List Total	Pop Hits	Pop Total	Fold Enrichment	Bonferroni	Benjamini	FDR
GOTERM_CC_DIRECT	GO:0005789~endoplasmic reticulum membrane	30	5.67108	0.79682	P05374, P32368, Q04338, Q06681, P32909, P06105, Q07541, P29704, Q12160, P38703, Q03455, Q06205, P23642, P40318, P40319, Q92316, Q00955, P53860, P53903, P33755, P38221, P38837, P53868, Q12746, Q08548, Q07418, P25045, P22214, P28496, P38968	CHO2, SAC1, VTI1, YSP2, SMY2, SCP160, YDL121C, ERG9, YPR063C, LAG1, MSC2, FPR4, VAN1, SSM4, SUR4, OST5, ACC1, PDR16, PGA2, NPL4, CDS1, NSG1, ALG9, PGA3, ALE1, PEX19, LCB1, SEC22, LAC1, SEC31	527	367	5861	0.90911	1	0.999588	100
UP_KEYWORDS	Endoplasmic reticulum	31	5.86011	0.80193	P05374, P32368, Q06681, P06105, Q07541, P29704, Q12160, P38703, Q03455, P23642, P40318, P40319, Q92316, Q00955, P53903, P53860, P33755, P25303, P38837, P38221, P53868, Q12746, Q08548, Q07418, P25045, P22214, P28496, P38138, P38968, P53178, Q03016	CHO2, SAC1, YSP2, SCP160, YDL121C, ERG9, YPR063C, LAG1, MSC2, VAN1, SSM4, SUR4, OST5, ACC1, PGA2, PDR16, NPL4, SCJ1, NSG1, CDS1, ALG9, PGA3, ALE1, PEX19, LCB1, SEC22, LAC1, ROT2, SEC31, ALG13, GIP3	529	382	5914	0.907244	1	0.987935	100
GOTERM_CC_DIRECT	GO:0005783~endoplasmic reticulum	42	7.93951	0.994244	P05374, P32368, Q00402, Q06681, P06105, Q07541, P40986, P29704, Q12160, P38703, Q12117, P20424, Q03455, P54781, P23642, P38248, P40318, P40319, Q00955, Q92316, P53903, P53860, P33755, P38687, P10614, P46956, P25303, P38837, P38221, Q12746, P53868, Q08548, P25037, Q07418, P25045, P22214, P28496, P38138, P53633, P38968, Q03016, P53178	CHO2, SAC1, NUM1, YSP2, SCP160, YDL121C, CDC1, ERG9, YPR063C, LAG1, MRH1, SRP54, MSC2, ERG5, VAN1, ECM33, SSM4, SUR4, ACC1, OST5, PGA2, PDR16, NPL4, SRP68, ERG11, PHO86, SCJ1, NSG1, CDS1, PGA3, ALG9, ALE1, UBP1, PEX19, LCB1, SEC22, LAC1, ROT2, YIP3, SEC31, GIP3, ALG13	527	636	5861	0.734435	1	1	100
UP_SEQ_FEATURE	topological domain:Cytoplasmic	34	6.42722	0.999997	P05374, P32368, Q04338, P32802, P47069, Q07541, P40986, P39106, P38703, Q12117, P32486, P32466, Q03455, P32465, P38069, P11491, P23642, P32791, P40318, P40319, Q92316, P46956, P10614, Q03640, P38837, Q12746, P53868, Q08548, P33302, P25045, P38631, P22214, P32621, P28496	CHO2, SAC1, VTI1, EMP70, MPS3, YDL121C, CDC1, MNN1, LAG1, MRH1, KRE6, HXT3, MSC2, HXT1, MNN2, PHO8, VAN1, FRE1, SSM4, SUR4, OST5, PHO86, ERG11, TCB3, NSG1, PGA3, ALG9, ALE1, PDR5, LCB1, FKS1, SEC22, GDA1, LAC1	529	693	5872	0.544598	1	1	100
GOTERM_CC_DIRECT	GO:0016021~integral component of membrane	67	12.6654	1	P49687, P38988, P52593, Q07541, P47069, P39106, P29704, P38703, P32486, P34232, Q06493, Q04175, P38181, P07143, P40579, P11491, P40069, P10614, Q03640, P40064, P42945, P38221, P38837, P53868, Q08548, P33302, P22214, P32621, P53633, P05374, P32368, Q12029, Q04338, Q06681, P32802, P40986, Q12160, Q12117, P40368, P04037, P32466, Q03455, P32465, O74700, P32798, P38069, P32897, P23642, P32791, P22203,…	NUP145, GGC1, NUP188, YDL121C, MPS3, MNN1, ERG9, LAG1, KRE6, MTR2, YLH47, SXM1, NUP170, CYT1, YIR035C, PHO8, KAP123, ERG11, TCB3, NUP157, UTP10, CDS1, NSG1, ALG9, ALE1, PDR5, SEC22, GDA1, YIP3, CHO2, SAC1, FSF1, VTI1, YSP2, EMP70, CDC1, YPR063C, MRH1, NUP82, COX4, HXT3, MSC2, HXT1, TIM9, COT1, MNN2, TIM23, VAN1, FRE1, VMA4, SSM4, SUR4, OST5, PGA2, GSP1, NPL4, PHO86, TIM10, PGA3, NUP1, VMA2, LCB1,…	527	1326	5861	0.561943	1	1	100
UP_SEQ_FEATURE	transmembrane region	50	9.4518	1	P05374, P32368, Q12029, Q04338, P38988, Q06681, P32802, P47069, Q07541, P40986, P39106, P29704, Q12160, P38703, Q12117, P32486, P38758, Q03455, P32466, P32465, Q06493, P38181, P32798, P07143, P38069, P32897, P11491, P23642, P32791, P40318, P40319, Q92316, P53903, P46956, P10614, Q03640, P38221, P38837, Q12746, P53868, Q08548, P33302, P25045, P38631, P22214, P28496, P32621, P53633, Q12445, Q08179	CHO2, SAC1, FSF1, VTI1, GGC1, YSP2, EMP70, MPS3, YDL121C, CDC1, MNN1, ERG9, YPR063C, LAG1, MRH1, KRE6, TDA3, MSC2, HXT3, HXT1, YLH47, NUP170, COT1, CYT1, MNN2, TIM23, PHO8, VAN1, FRE1, SSM4, SUR4, OST5, PGA2, PHO86, ERG11, TCB3, CDS1, NSG1, PGA3, ALG9, ALE1, PDR5, LCB1, FKS1, SEC22, LAC1, GDA1, YIP3, POM34, MDM38	529	1164	5872	0.476812	1	1	100
UP_KEYWORDS	Transmembrane helix	48	9.07372	1	P32368, P05374, Q12029, Q04338, P38988, Q06681, P32802, P47069, Q07541, P40986, P39106, P29704, Q12160, P38703, Q12117, P32486, P32466, Q03455, P32465, Q06493, P32798, P07143, P38069, P32897, P11491, P23642, P32791, P40318, P40319, Q92316, P53903, P10614, P46956, Q03640, P38837, P38221, Q12746, P53868, Q08548, P33302, P25045, P38631, P22214, P28496, P32621, P53633, Q12445, Q08179	SAC1, CHO2, FSF1, VTI1, GGC1, YSP2, EMP70, MPS3, YDL121C, CDC1, MNN1, ERG9, YPR063C, LAG1, MRH1, KRE6, HXT3, MSC2, HXT1, YLH47, COT1, CYT1, MNN2, TIM23, PHO8, VAN1, FRE1, SSM4, SUR4, OST5, PGA2, ERG11, PHO86, TCB3, NSG1, CDS1, PGA3, ALG9, ALE1, PDR5, LCB1, FKS1, SEC22, LAC1, GDA1, YIP3, POM34, MDM38	529	1176	5914	0.45631	1	1	100
UP_KEYWORDS	Transmembrane	48	9.07372	1	P32368, P05374, Q12029, Q04338, P38988, Q06681, P32802, P47069, Q07541, P40986, P39106, P29704, Q12160, P38703, Q12117, P32486, P32466, Q03455, P32465, Q06493, P32798, P07143, P38069, P32897, P11491, P23642, P32791, P40318, P40319, Q92316, P53903, P10614, P46956, Q03640, P38837, P38221, Q12746, P53868, Q08548, P33302, P25045, P38631, P22214, P28496, P32621, P53633, Q12445, Q08179	SAC1, CHO2, FSF1, VTI1, GGC1, YSP2, EMP70, MPS3, YDL121C, CDC1, MNN1, ERG9, YPR063C, LAG1, MRH1, KRE6, HXT3, MSC2, HXT1, YLH47, COT1, CYT1, MNN2, TIM23, PHO8, VAN1, FRE1, SSM4, SUR4, OST5, PGA2, ERG11, PHO86, TCB3, NSG1, CDS1, PGA3, ALG9, ALE1, PDR5, LCB1, FKS1, SEC22, LAC1, GDA1, YIP3, POM34, MDM38	529	1182	5914	0.453993	1	1	100
UP_KEYWORDS	Membrane	82	15.5009	1	P49687, P38988, P52593, P06105, Q07541, P47069, P39106, P29704, P38703, P32486, Q06493, P38181, P07143, P11491, P23292, P13259, Q00955, P53860, P10614, Q03640, P40064, P38221, P38837, P36000, P53868, Q04632, Q08548, Q07418, P33302, Q06315, P32623, P22214, P32621, P24280, P53633, P05374, P32368, Q12029, Q04338, Q12028, Q06681, P32802, P40986, Q12160, P46682, Q12114, Q12117, P40368, P04037, Q03455,…	NUP145, GGC1, NUP188, SCP160, YDL121C, MPS3, MNN1, ERG9, LAG1, KRE6, YLH47, NUP170, CYT1, PHO8, YCK2, PCT1, ACC1, PDR16, ERG11, TCB3, NUP157, CDS1, NSG1, APL2, ALG9, COG8, ALE1, PEX19, PDR5, SKG3, UTR2, SEC22, GDA1, SEC14, YIP3, CHO2, SAC1, FSF1, VTI1, APL4, YSP2, EMP70, CDC1, YPR063C, APL6, CHS5, MRH1, NUP82, COX4, MSC2, HXT3, MAK11, HXT1, DBP5, TIM9, COT1, RET3, MNN2, TIM23, VAN1, ECM33, FRE1, …	529	1712	5914	0.535471	1	1	100
GOTERM_CC_DIRECT	GO:0016020~membrane	84	15.879	1	P49687, P38988, P52593, P06105, P32864, Q07541, P47069, P39106, P29704, P38703, P32486, Q06493, P38181, P07143, P11491, P23292, P13259, Q00955, P53860, P10614, Q03640, P40064, P38221, P38837, P36000, P53868, Q04632, Q08548, Q07418, P33302, Q06315, P32623, P22214, P32621, P24280, P53633, P05374, P32368, Q12029, Q04338, Q12028, Q06681, P32802, P40986, Q12160, P46682, Q12114, Q12117, P40368, P04037,…	NUP145, GGC1, NUP188, SCP160, MRS6, YDL121C, MPS3, MNN1, ERG9, LAG1, KRE6, YLH47, NUP170, CYT1, PHO8, YCK2, PCT1, ACC1, PDR16, ERG11, TCB3, NUP157, CDS1, NSG1, APL2, ALG9, COG8, ALE1, PEX19, PDR5, SKG3, UTR2, SEC22, GDA1, SEC14, YIP3, CHO2, SAC1, FSF1, VTI1, APL4, YSP2, EMP70, CDC1, YPR063C, APL6, CHS5, MRH1, NUP82, COX4, MSC2, HXT3, MAK11, HXT1, DBP5, TIM9, COT1, RET3, MNN2, TIM23, VAN1, ECM33, …	527	1738	5861	0.537515	1	1	100
Annotation Cluster 80	Enrichment Score: 0.01955707043360021
Category	Term	Count	%	PValue	Genes/Uniprot	Gene Names	List Total	Pop Hits	Pop Total	Fold Enrichment	Bonferroni	Benjamini	FDR
UP_KEYWORDS	Cell wall	5	0.94518	0.844514	P32623, P10592, P53753, Q03655, P38248	UTR2, SSA2, DSE4, GAS3, ECM33	529	65	5914	0.859968	1	0.992683	100
GOTERM_CC_DIRECT	GO:0005618~cell wall	5	0.94518	0.871314	P32623, P10592, P53753, Q03655, P38248	UTR2, SSA2, DSE4, GAS3, ECM33	527	68	5861	0.817753	1	0.99994	100
UP_KEYWORDS	Cell wall biogenesis/degradation	6	1.13422	0.92755	P42842, P32623, P38631, Q03655, P32486, P38248	EMW1, UTR2, FKS1, GAS3, KRE6, ECM33	529	93	5914	0.721263	1	0.998434	100
GOTERM_CC_DIRECT	GO:0005576~extracellular region	7	1.32325	0.938523	P38821, P32623, P05694, P10592, P53753, Q03655, P38248	APE4, UTR2, MET6, SSA2, DSE4, GAS3, ECM33	527	110	5861	0.707728	1	0.999992	100
GOTERM_BP_DIRECT	GO:0071555~cell wall organization	6	1.13422	0.945235	P42842, P32623, P38631, Q03655, P32486, P38248	EMW1, UTR2, FKS1, GAS3, KRE6, ECM33	517	94	5557	0.686078	1	1	100
GOTERM_MF_DIRECT	GO:0016798~hydrolase activity, acting on glycosyl bonds	3	0.567108	0.951687	P32623, P38138, P53753	UTR2, ROT2, DSE4	487	46	4885	0.654183	1	1	100
UP_KEYWORDS	Secreted	5	0.94518	0.955779	P32623, P10592, P53753, Q03655, P38248	UTR2, SSA2, DSE4, GAS3, ECM33	529	86	5914	0.649976	1	0.999335	100
GOTERM_CC_DIRECT	GO:0009277~fungal-type cell wall	6	1.13422	0.980187	P32623, P14540, P10592, P53753, Q03655, P38248	UTR2, FBA1, SSA2, DSE4, GAS3, ECM33	527	114	5861	0.585339	1	1	100
UP_SEQ_FEATURE	propeptide:Removed in mature form	4	0.756144	0.98089	P32623, Q03655, P11491, P38248	UTR2, GAS3, PHO8, ECM33	529	81	5872	0.548157	1	1	100
UP_KEYWORDS	GPI-anchor	3	0.567108	0.982127	P32623, Q03655, P38248	UTR2, GAS3, ECM33	529	64	5914	0.524043	1	0.999835	100
GOTERM_CC_DIRECT	GO:0031225~anchored component of membrane	3	0.567108	0.983985	P32623, Q03655, P38248	UTR2, GAS3, ECM33	527	65	5861	0.513297	1	1	100
UP_KEYWORDS	Lipoprotein	6	1.13422	0.994789	P32623, P25491, Q03655, P38248, P23292, Q07418	UTR2, YDJ1, GAS3, ECM33, YCK2, PEX19	529	135	5914	0.49687	1	0.999983	100
UP_SEQ_FEATURE	glycosylation site:N-linked (GlcNAc...)	20	3.78072	0.999714	P32802, P39106, P53753, Q12160, P46982, P38703, P32486, P33302, P32466, P32465, P32623, P32621, P28496, P38138, P38069, Q03655, P11491, P23642, P38248, P32791	EMP70, MNN1, DSE4, YPR063C, MNN5, LAG1, KRE6, PDR5, HXT3, HXT1, UTR2, GDA1, LAC1, ROT2, MNN2, GAS3, PHO8, VAN1, ECM33, FRE1	529	402	5872	0.552248	1	1	100
UP_SEQ_FEATURE	signal peptide	9	1.70132	0.999995	P25303, P32623, P32802, P38138, P53753, P46982, Q03655, P38248, P32791	SCJ1, UTR2, EMP70, ROT2, DSE4, MNN5, GAS3, ECM33, FRE1	529	286	5872	0.349307	1	1	100
UP_KEYWORDS	Signal	9	1.70132	0.999996	P25303, P32623, P32802, P38138, P53753, P46982, Q03655, P38248, P32791	SCJ1, UTR2, EMP70, ROT2, DSE4, MNN5, GAS3, ECM33, FRE1	529	292	5914	0.344576	1	1	100
Annotation Cluster 81	Enrichment Score: 0.003559968510038392
Category	Term	Count	%	PValue	Genes/Uniprot	Gene Names	List Total	Pop Hits	Pop Total	Fold Enrichment	Bonferroni	Benjamini	FDR
GOTERM_BP_DIRECT	GO:0006281~DNA repair	12	2.26843	0.97337	P47037, P21951, P32628, Q03940, P26755, P29295, P25454, P40986, P48570, P20433, P26793, P35732	SMC3, POL2, RAD23, RVB1, RFA3, HRR25, RAD51, CDC1, LYS20, RPB4, RAD27, DEF1	517	191	5557	0.675302	1	1	100
UP_KEYWORDS	DNA repair	7	1.32325	0.995739	P32628, Q03940, P29295, P25454, P20433, P26793, P35732	RAD23, RVB1, HRR25, RAD51, RPB4, RAD27, DEF1	529	155	5914	0.504884	1	0.999985	100
UP_KEYWORDS	DNA damage	7	1.32325	0.99872	P32628, Q03940, P29295, P25454, P20433, P26793, P35732	RAD23, RVB1, HRR25, RAD51, RPB4, RAD27, DEF1	529	173	5914	0.452353	1	0.999998	100
GOTERM_BP_DIRECT	GO:0006974~cellular response to DNA damage stimulus	8	1.51229	0.999754	P43639, P32628, Q03940, P29295, P25454, P20433, P26793, P35732	CKB1, RAD23, RVB1, HRR25, RAD51, RPB4, RAD27, DEF1	517	206	5557	0.417419	1	1	100
Annotation Cluster 82	Enrichment Score: 1.4266443110497676E-5
Category	Term	Count	%	PValue	Genes/Uniprot	Gene Names	List Total	Pop Hits	Pop Total	Fold Enrichment	Bonferroni	Benjamini	FDR
UP_KEYWORDS	Vacuole	5	0.94518	0.999949	P38821, P38873, P32802, P11491, P22203	APE4, KOG1, EMP70, PHO8, VMA4	529	178	5914	0.314033	1	1	100
GOTERM_CC_DIRECT	GO:0005774~vacuolar membrane	4	0.756144	0.999975	P38873, P32802, P11491, P22203	KOG1, EMP70, PHO8, VMA4	527	164	5861	0.271255	1	1	100
GOTERM_CC_DIRECT	GO:0005773~vacuole	6	1.13422	0.999978	P38821, P38873, P32802, Q00816, P11491, P22203	APE4, KOG1, EMP70, REG1, PHO8, VMA4	527	208	5861	0.320811	1	1	100

## Sheet: Cluster 3
Annotation Cluster 1	Enrichment Score: 5.740969957085407
Category	Term	Count	%	PValue	Genes/Uniprot	Gene Names	List Total	Pop Hits	Pop Total	Fold Enrichment	Bonferroni	Benjamini	FDR
GOTERM_BP_DIRECT	GO:0055114~oxidation-reduction process	48	13.8728	2.18927e-08	Q03219, P48360, P22803, P00425, P38234, Q12284, P40012, Q12480, P49957, P53839, P40557, P36156, Q99316, P39945, Q12335, P32614, Q00055, P38067, P14065, P40471, Q12452, P40215, Q03102, P17505, P17967, Q01519, P23180, P32353, P28241, P25349, P53720, P48015, P53111, P00128, P34227, P25372, P40580, P40581, P25373, P41911, P07275, P28834, P36088, P36060, Q99190, P36086, P47137, P46151	YMR178W, ARH1, TRX2, COX5B, RFS1, ERV2, HEM14, AIM45, TRM9, GOR1, EPS1, ECM4, MPD2, AST2, PST2, FRD1, GPD1, UGA2, GCY1, AYR1, ERG27, NDE1, YML131W, MDH1, PDI1, COX12, AIM17, ERG3, IDH2, YCP4, SMM1, GCV1, ARI1, QCR7, PRX1, TRX3, IRC24, HYR1, GRX1, GPD2, PUT2, IDH1, YKL069W, MCR1, TSC13, YKL071W, YJR096W, MET12	324	347	5557	2.37251	1.65945e-05	1.65945e-05	3.33672e-05
GOTERM_MF_DIRECT	GO:0016491~oxidoreductase activity	37	10.6936	8.21267e-06	P48360, P00425, Q12284, P40012, Q12480, P53839, P36156, P39945, P32614, Q12335, Q00055, P38067, P14065, P40471, Q12452, P40215, Q03102, P17505, Q01519, P23180, P32353, P28241, P25349, P53720, P53111, P34227, P40580, P40581, P41911, P07275, P28834, P36088, P36060, Q99190, P36086, P47137, P46151	ARH1, COX5B, ERV2, HEM14, AIM45, GOR1, ECM4, AST2, FRD1, PST2, GPD1, UGA2, GCY1, AYR1, ERG27, NDE1, YML131W, MDH1, COX12, AIM17, ERG3, IDH2, YCP4, SMM1, ARI1, PRX1, IRC24, HYR1, GPD2, PUT2, IDH1, YKL069W, MCR1, TSC13, YKL071W, YJR096W, MET12	283	292	4885	2.18724	0.00340247	0.00340247	0.0115158
UP_KEYWORDS	Oxidoreductase	33	9.53757	3.32894e-05	P48360, P00425, Q12284, P40012, P53839, P36156, P32614, Q00055, P38067, P14065, P40471, Q12452, P40215, Q03102, P17505, Q01519, P23180, P32353, P28241, P53720, P53111, P34227, P40580, P40581, P41911, P07275, P28834, P36088, P36060, P36086, Q99190, P47137, P46151	ARH1, COX5B, ERV2, HEM14, GOR1, ECM4, FRD1, GPD1, UGA2, GCY1, AYR1, ERG27, NDE1, YML131W, MDH1, COX12, AIM17, ERG3, IDH2, SMM1, ARI1, PRX1, IRC24, HYR1, GPD2, PUT2, IDH1, YKL069W, MCR1, YKL071W, TSC13, YJR096W, MET12	346	258	5914	2.18625	0.00699957	0.00350593	0.0420823
Annotation Cluster 2	Enrichment Score: 3.77926936168384
Category	Term	Count	%	PValue	Genes/Uniprot	Gene Names	List Total	Pop Hits	Pop Total	Fold Enrichment	Bonferroni	Benjamini	FDR
UP_KEYWORDS	Transit peptide	42	12.1387	3.9118e-05	P48360, P32843, P53598, P00425, P40053, Q12480, P36147, Q04935, P40008, P32445, P08417, P00830, Q06892, P33416, P36112, Q12511, Q02486, P47127, P38797, Q03667, P09457, P40215, P17505, P27697, P53312, P54964, P23180, P00890, P28241, P49017, P48015, P25372, P32787, P16451, P32454, P41911, P07275, P28834, P38077, P07251, P32335, P05626	ARH1, YME2, LSC1, COX5B, AIM9, AIM45, PAM17, COX20, FMP52, RIM1, FUM1, ATP2, POS5, HSP78, MIC60, PTC5, ABF2, AIM24, PTC7, MIX17, ATP5, NDE1, MDH1, COQ8, LSC2, REX2, AIM17, CIT1, IDH2, COQ5, GCV1, TRX3, MGM101, PDX1, APE2, GPD2, PUT2, IDH1, ATP3, ATP1, MSS51, ATP4	346	370	5914	1.94023	0.00822009	0.00274757	0.0494488
UP_SEQ_FEATURE	transit peptide:Mitochondrion	37	10.6936	0.000131019	P48360, P32843, P53598, P00425, Q12480, P36147, Q04935, P40008, P32445, P08417, P00830, Q06892, P33416, Q02486, P38797, Q03667, P09457, P40215, P17505, P27697, P53312, P54964, P00890, P28241, P49017, P48015, P25372, P32787, P16451, P32454, P07275, P41911, P28834, P38077, P07251, P32335, P05626	ARH1, YME2, LSC1, COX5B, AIM45, PAM17, COX20, FMP52, RIM1, FUM1, ATP2, POS5, HSP78, ABF2, PTC7, MIX17, ATP5, NDE1, MDH1, COQ8, LSC2, REX2, CIT1, IDH2, COQ5, GCV1, TRX3, MGM101, PDX1, APE2, PUT2, GPD2, IDH1, ATP3, ATP1, MSS51, ATP4	346	324	5872	1.93806	0.0901456	0.023341	0.198182
GOTERM_CC_DIRECT	GO:0005739~mitochondrion	97	28.0347	0.00026485	Q12233, P48360, P53598, P40012, P53839, Q08959, P08417, P17106, P14020, P00830, P53252, P32614, Q12335, Q00055, P33416, P36112, P47127, P20107, P17505, P54964, P28241, P25372, Q03778, P47039, P32787, P33202, P32381, Q12230, P40037, P18411, Q05050, Q06892, Q12511, Q03667, P53889, P40215, P01120, P53312, P27697, P23180, P30902, P49017, P25349, Q12305, P46992, P32939, Q05359, P40303, P46989, P00425,…	ATP20, ARH1, LSC1, HEM14, GOR1, PGC1, FUM1, CBF1, DPM1, ATP2, PIL1, FRD1, PST2, GPD1, HSP78, MIC60, AIM24, ZRC1, MDH1, REX2, IDH2, TRX3, FMN1, BNA3, MGM101, UFD4, ARP2, LSP1, HMF1, FUN14, EIS1, POS5, PTC5, MIX17, FMP41, NDE1, RAS2, LSC2, COQ8, AIM17, ATP7, COQ5, YCP4, RDL1, YJL171C, YPT7, ERP1, PRE6, ATG27, COX5B, ERV2, AIM9, PAM17, AIM45, COX20, FMP52, RIM1, CUE1, AYR1, VRG4, ATP5, CIT1, FAA1, G…	344	1189	5861	1.38996	0.0633322	0.0130001	0.342868
UP_KEYWORDS	Mitochondrion	67	19.3642	0.000562617	Q12233, P46989, P48360, P53598, P00425, P40053, P40012, P36147, Q12480, Q04935, P53839, P40008, Q08959, P32445, P08417, P17106, P00830, P33416, P36112, P47127, P09457, P20107, P17505, P00890, P54964, P28241, P48015, P00128, P25372, Q03778, P40581, P47039, P16451, P32787, P53075, P07275, P32335, P05626, P40037, P32843, Q06892, P43582, P23641, Q02486, Q12511, P38797, Q03667, P53889, P40215, P27697,…	ATP20, ATG27, ARH1, LSC1, COX5B, AIM9, HEM14, PAM17, AIM45, COX20, GOR1, FMP52, PGC1, RIM1, FUM1, CBF1, ATP2, HSP78, MIC60, AIM24, ATP5, ZRC1, MDH1, CIT1, REX2, IDH2, GCV1, QCR7, TRX3, FMN1, HYR1, BNA3, PDX1, MGM101, SHE10, PUT2, MSS51, ATP4, HMF1, YME2, POS5, WWM1, MIR1, ABF2, PTC5, PTC7, MIX17, FMP41, NDE1, COQ8, LSC2, COX12, AIM17, ATP7, COQ5, YCP4, YKR018C, PRX1, AAC1, RDL1, APE2, GPD2, IDH1,…	346	768	5914	1.49114	0.111966	0.0147336	0.709035
Annotation Cluster 3	Enrichment Score: 3.1714910030108356
Category	Term	Count	%	PValue	Genes/Uniprot	Gene Names	List Total	Pop Hits	Pop Total	Fold Enrichment	Bonferroni	Benjamini	FDR
GOTERM_CC_DIRECT	GO:0005783~endoplasmic reticulum	73	21.0983	1.14225e-08	P40056, Q05359, P43613, P39007, Q12284, P36149, P36148, P35723, P40008, P21825, P14020, Q99316, P38428, Q99220, P53629, P40471, P43560, P40107, P39704, Q04969, P11655, P30624, P33775, P13856, P25574, P39926, Q12466, Q03778, P53075, Q08199, P22213, P53174, P53898, P38256, Q12462, Q03516, Q12402, P38310, P25560, P40030, P54837, Q06169, Q12078, P47008, P40557, P07267, P31382, P39742, P31755, Q03362,…	GET2, ERP1, ERJ5, STT3, ERV2, BET3, GPT2, YET1, FMP52, SEC62, DPM1, MPD2, CUE1, YOS9, ARE2, AYR1, YFL042C, VRG4, ERP2, SPC2, SEC12, FAA1, PMT1, RSR1, EMC1, SSO2, TCB1, FMN1, SHE10, SIL1, SLY1, PRM8, NSG2, YBR096W, PEX11, RSN1, YOP1, FTH1, RER1, ERG28, ERV25, PEX30, SMF3, SFH5, EPS1, PEP4, PMT2, SEC72, OCH1, YDR476C, YET3, ALG1, CDC28, OST3, FAR11, ERV29, ERG27, KRE5, MAM3, PDI1, MNN10, ERG2, ERG3…	344	636	5861	1.9556	2.82136e-06	2.82136e-06	1.48108e-05
UP_KEYWORDS	Endoplasmic reticulum	51	14.7399	2.85507e-08	P40056, Q05359, P43613, P39007, Q12284, P36149, P35723, P21825, P14020, Q99316, P38428, Q99220, P53629, P43560, P40471, P40107, Q04969, P39704, P11655, P33775, P25574, Q03778, Q08199, P53174, P53898, Q12402, P40030, P54837, Q12078, P47008, P40557, P31382, Q03362, P31755, Q07451, P16661, P48439, P53337, P22023, Q12452, P50108, P17967, P32352, P32353, Q12743, P36016, P16474, Q04228, Q99190, P53224,…	GET2, ERP1, ERJ5, STT3, ERV2, BET3, YET1, SEC62, DPM1, MPD2, CUE1, YOS9, ARE2, YFL042C, AYR1, VRG4, SPC2, ERP2, SEC12, PMT1, EMC1, FMN1, SIL1, PRM8, NSG2, YOP1, ERG28, ERV25, SMF3, SFH5, EPS1, PMT2, YDR476C, OCH1, YET3, ALG1, OST3, ERV29, KRE5, ERG27, MNN10, PDI1, ERG2, ERG3, DFM1, LHS1, KAR2, UBX2, TSC13, ORM1, SWP1	346	382	5914	2.28198	6.02418e-06	6.02418e-06	3.60989e-05
GOTERM_CC_DIRECT	GO:0005789~endoplasmic reticulum membrane	44	12.7168	6.55585e-06	P40056, P43613, P53898, Q05359, Q12402, P39007, Q12284, P40030, P54837, P42839, P30656, P35723, Q12078, P21825, P47008, P40557, P14020, P38428, P31382, Q99220, P53629, P31755, Q07451, P16661, P43560, P48439, P40107, P53337, Q12452, Q05905, P01120, P50108, P39704, Q04969, P32352, P32353, P11655, Q12743, P33775, P25574, Q04228, Q99190, P53224, Q02795	GET2, ERJ5, NSG2, ERP1, YOP1, STT3, ERV2, ERG28, ERV25, VNX1, PRE2, YET1, SMF3, SEC62, SFH5, EPS1, DPM1, CUE1, PMT2, YOS9, ARE2, OCH1, YET3, ALG1, YFL042C, OST3, VRG4, ERV29, ERG27, HRI1, RAS2, MNN10, ERP2, SPC2, ERG2, ERG3, SEC12, DFM1, PMT1, EMC1, UBX2, TSC13, ORM1, SWP1	344	367	5861	2.04268	0.00161799	0.000809322	0.00850016
UP_SEQ_FEATURE	topological domain:Lumenal	32	9.24855	5.52664e-05	P43613, P53898, Q05359, P46989, P39007, Q12284, P25560, P40030, P54837, P35723, P21825, P14020, P38428, P31382, P31755, Q07451, P16661, P40107, P39010, P53337, P38166, P50108, P39704, Q04969, Q08299, P32353, P11655, Q12743, P33775, P25574, P34163, Q99190	ERJ5, NSG2, ERP1, ATG27, STT3, ERV2, RER1, ERG28, ERV25, YET1, SEC62, DPM1, CUE1, PMT2, OCH1, YET3, ALG1, VRG4, AKR1, ERV29, SFT2, MNN10, ERP2, SPC2, ENB1, ERG3, SEC12, DFM1, PMT1, EMC1, TGL1, TSC13	346	251	5872	2.16365	0.0390647	0.0197269	0.0836422
UP_KEYWORDS	Membrane	126	36.4162	0.00153868	Q12233, P22803, Q04279, P39007, Q05029, Q05812, P40012, P42839, P35723, P39109, Q08959, P00830, P14020, P38736, P13186, Q99220, P53629, P36112, P36095, P38932, P39010, P20107, P38166, P39929, P39704, Q04969, P32913, P11655, P25574, P13856, P39926, Q92331, Q03778, P22213, Q04410, P53898, Q12462, P18411, P25560, P40030, P54837, Q12078, P47008, P40557, Q05050, P31382, P31755, Q07451, Q12452, P01120,…	ATP20, TRX2, SEG1, STT3, BCH1, MSC3, HEM14, VNX1, YET1, YCF1, PGC1, ATP2, DPM1, GOS1, KIN2, YOS9, ARE2, MIC60, VPS24, VPS45, AKR1, ZRC1, SFT2, SNF7, ERP2, SPC2, VPS17, SEC12, EMC1, RSR1, SSO2, VPS5, FMN1, SLY1, GRH1, NSG2, PEX11, FUN14, RER1, ERG28, ERV25, SMF3, SFH5, EPS1, EIS1, PMT2, OCH1, YET3, ERG27, RAS2, YML131W, COQ8, MNN10, ERG2, ERG3, ATP7, COQ5, YCP4, SEC27, MDG1, DID2, YJL171C, TGL1, P…	346	1712	5914	1.25797	0.277409	0.0246835	1.92815
GOTERM_CC_DIRECT	GO:0016020~membrane	126	36.4162	0.00313064	Q12233, P22803, Q04279, P39007, Q05029, Q05812, P40012, P42839, P35723, P39109, Q08959, P00830, P14020, P38736, P13186, Q99220, P53629, P36112, P36095, P38932, P39010, P20107, P38166, P39929, P39704, Q04969, P32913, P11655, P25574, P13856, P39926, Q92331, Q03778, P22213, Q04410, P53898, Q12462, P18411, P25560, P40030, P54837, Q12078, P47008, P40557, Q05050, P31382, P31755, Q07451, Q12452, P01120,…	ATP20, TRX2, SEG1, STT3, BCH1, MSC3, HEM14, VNX1, YET1, YCF1, PGC1, ATP2, DPM1, GOS1, KIN2, YOS9, ARE2, MIC60, VPS24, VPS45, AKR1, ZRC1, SFT2, SNF7, ERP2, SPC2, VPS17, SEC12, EMC1, RSR1, SSO2, VPS5, FMN1, SLY1, GRH1, NSG2, PEX11, FUN14, RER1, ERG28, ERV25, SMF3, SFH5, EPS1, EIS1, PMT2, OCH1, YET3, ERG27, RAS2, YML131W, COQ8, MNN10, ERG2, ERG3, ATP7, COQ5, YCP4, SEC27, MDG1, DID2, YJL171C, TGL1, P…	344	1738	5861	1.23519	0.539057	0.0745249	3.9841
GOTERM_CC_DIRECT	GO:0016021~integral component of membrane	92	26.5896	0.0448773	P40056, Q05359, P43613, P46989, P00425, P39007, P40308, Q12284, P36148, P36147, P42839, P35723, Q04935, P39109, P21825, Q08959, P00830, P14020, P53067, P38736, P38428, P53629, P40474, P40471, P36112, P43560, P40107, P39010, P09457, P20107, P38166, P39704, Q04969, Q01590, Q08299, P11655, P06704, P33775, A5Z2X5, P25574, P39926, P00128, Q12466, P40580, P53174, P36086, P05626, P53898, P32843, Q03516,…	GET2, ERP1, ERJ5, ATG27, COX5B, STT3, TGL3, ERV2, GPT2, PAM17, VNX1, YET1, COX20, YCF1, SEC62, PGC1, ATP2, DPM1, KAP114, GOS1, CUE1, ARE2, QDR2, AYR1, MIC60, YFL042C, VRG4, AKR1, ATP5, ZRC1, SFT2, ERP2, SPC2, SED5, ENB1, SEC12, CDC31, PMT1, YPR010C-A, EMC1, SSO2, QCR7, TCB1, IRC24, PRM8, YKL071W, ATP4, NSG2, YME2, RSN1, YOP1, FUN14, FTH1, RER1, ERG28, ERV25, YPR147C, PEX30, SMF3, EPS1, PMT2, NTF2…	344	1326	5861	1.18211	0.999988	0.364692	44.8632
UP_SEQ_FEATURE	topological domain:Cytoplasmic	51	14.7399	0.0702354	Q05359, P43613, P46989, P39007, Q12284, P36148, P35723, P42839, P39109, P21825, P14020, P38428, P38736, P40474, P40107, P39010, P20107, P38166, Q01590, Q04969, P39704, Q08299, P11655, P33775, P25574, P39926, Q12466, P53174, P53898, P38310, P25560, P40030, P54837, P31382, P31755, Q07451, P16661, P48439, P53337, Q12296, Q03102, P50108, P32353, P49573, P40527, Q12743, P38929, P34163, Q99190, P53224,…	ERP1, ERJ5, ATG27, STT3, ERV2, GPT2, YET1, VNX1, YCF1, SEC62, DPM1, CUE1, GOS1, QDR2, VRG4, AKR1, ZRC1, SFT2, SED5, SPC2, ERP2, ENB1, SEC12, PMT1, EMC1, SSO2, TCB1, PRM8, NSG2, FTH1, RER1, ERG28, ERV25, PMT2, OCH1, YET3, ALG1, OST3, ERV29, MAM3, YML131W, MNN10, ERG3, CTR1, NEO1, DFM1, PMC1, TGL1, TSC13, ORM1, SWP1	346	693	5872	1.24896	1	0.936928	66.7984
UP_SEQ_FEATURE	transmembrane region	77	22.2543	0.161013	P40056, Q05359, P43613, P46989, P39007, Q12284, P40308, P36148, P36147, P42839, P35723, Q04935, P39109, P21825, Q08959, P14020, P38428, P38736, P53629, P40474, P43560, P40107, P39010, P20107, P38166, P39704, Q04969, Q01590, Q08299, P11655, P33775, A5Z2X5, P25574, P39926, Q12466, P53174, P53898, P32843, Q03516, Q12402, P18411, P38310, P25560, P40030, P54837, Q06522, Q06169, Q12078, P40557, P31382,…	GET2, ERP1, ERJ5, ATG27, STT3, ERV2, TGL3, GPT2, PAM17, VNX1, YET1, COX20, YCF1, SEC62, PGC1, DPM1, CUE1, GOS1, ARE2, QDR2, YFL042C, VRG4, AKR1, ZRC1, SFT2, ERP2, SPC2, SED5, ENB1, SEC12, PMT1, YPR010C-A, EMC1, SSO2, TCB1, PRM8, NSG2, YME2, RSN1, YOP1, FUN14, FTH1, RER1, ERG28, ERV25, YPR147C, PEX30, SMF3, EPS1, PMT2, WWM1, OCH1, YET3, ALG1, MIR1, OST3, PTC5, ERV29, MAM3, YML131W, MNN10, ERG2, ER…	346	1164	5872	1.12266	1	0.990796	92.9913
UP_KEYWORDS	Transmembrane helix	76	21.9653	0.205045	P40056, Q05359, P43613, P46989, P39007, Q12284, P40308, P36148, P36147, P42839, P35723, Q04935, P39109, P21825, Q08959, P14020, P38428, P38736, P53629, P40474, P36112, P43560, P40107, P39010, P20107, P38166, P39704, Q01590, Q04969, Q08299, P11655, P33775, A5Z2X5, P25574, P39926, Q12466, P53174, P53898, P32843, Q03516, Q12402, P18411, P38310, P25560, P40030, P54837, Q06522, Q06169, Q12078, P40557,…	GET2, ERP1, ERJ5, ATG27, STT3, ERV2, TGL3, GPT2, PAM17, VNX1, YET1, COX20, YCF1, SEC62, PGC1, DPM1, CUE1, GOS1, ARE2, QDR2, MIC60, YFL042C, VRG4, AKR1, ZRC1, SFT2, ERP2, SED5, SPC2, ENB1, SEC12, PMT1, YPR010C-A, EMC1, SSO2, TCB1, PRM8, NSG2, YME2, RSN1, YOP1, FUN14, FTH1, RER1, ERG28, ERV25, YPR147C, PEX30, SMF3, EPS1, PMT2, OCH1, YET3, ALG1, MIR1, OST3, ERV29, MAM3, YML131W, MNN10, ERG2, ERG3, C…	346	1176	5914	1.10462	1	0.650959	94.5052
UP_KEYWORDS	Transmembrane	76	21.9653	0.219309	P40056, Q05359, P43613, P46989, P39007, Q12284, P40308, P36148, P36147, P42839, P35723, Q04935, P39109, P21825, Q08959, P14020, P38428, P38736, P53629, P40474, P36112, P43560, P40107, P39010, P20107, P38166, P39704, Q01590, Q04969, Q08299, P11655, P33775, A5Z2X5, P25574, P39926, Q12466, P53174, P53898, P32843, Q03516, Q12402, P18411, P38310, P25560, P40030, P54837, Q06522, Q06169, Q12078, P40557,…	GET2, ERP1, ERJ5, ATG27, STT3, ERV2, TGL3, GPT2, PAM17, VNX1, YET1, COX20, YCF1, SEC62, PGC1, DPM1, CUE1, GOS1, ARE2, QDR2, MIC60, YFL042C, VRG4, AKR1, ZRC1, SFT2, ERP2, SED5, SPC2, ENB1, SEC12, PMT1, YPR010C-A, EMC1, SSO2, TCB1, PRM8, NSG2, YME2, RSN1, YOP1, FUN14, FTH1, RER1, ERG28, ERV25, YPR147C, PEX30, SMF3, EPS1, PMT2, OCH1, YET3, ALG1, MIR1, OST3, ERV29, MAM3, YML131W, MNN10, ERG2, ERG3, C…	346	1182	5914	1.09901	1	0.648228	95.6295
Annotation Cluster 4	Enrichment Score: 3.130082732183039
Category	Term	Count	%	PValue	Genes/Uniprot	Gene Names	List Total	Pop Hits	Pop Total	Fold Enrichment	Bonferroni	Benjamini	FDR
GOTERM_BP_DIRECT	GO:0016192~vesicle-mediated transport	23	6.6474	6.85431e-05	P40056, Q05359, P38166, Q01590, P39704, Q12402, P11655, P36149, P39743, P54837, P41811, P35723, P39926, P40509, P38736, P22213, P53174, Q07451, P00546, P32939, P19146, Q04410, P38932	GET2, ERP1, SFT2, SED5, ERP2, YOP1, SEC12, BET3, RVS167, ERV25, SEC27, YET1, SSO2, SEC28, GOS1, SLY1, PRM8, YET3, CDC28, YPT7, ARF2, GRH1, VPS45	324	154	5557	2.56155	0.0506308	0.0256442	0.104417
UP_KEYWORDS	ER-Golgi transport	14	4.04624	0.000221941	P40056, Q05359, P39704, P11655, P36149, P54837, P41811, P35723, P40509, P38736, Q07451, P53174, P19146, Q04410	GET2, ERP1, ERP2, SEC12, BET3, ERV25, SEC27, YET1, SEC28, GOS1, YET3, PRM8, ARF2, GRH1	346	72	5914	3.32354	0.045755	0.00932322	0.280256
GOTERM_CC_DIRECT	GO:0000139~Golgi membrane	20	5.78035	0.00038458	P40056, P38166, P46989, P22803, Q01590, Q12402, P25560, P40527, P54837, P41811, Q92331, P40509, P38736, P22213, P31755, P41318, Q04410, P40107, P38932, P39010	GET2, SFT2, ATG27, TRX2, SED5, YOP1, RER1, NEO1, ERV25, SEC27, VPS5, SEC28, GOS1, SLY1, OCH1, LST8, GRH1, VRG4, VPS45, AKR1	344	138	5861	2.46925	0.0906357	0.0118059	0.497511
GOTERM_BP_DIRECT	GO:0006888~ER to Golgi vesicle-mediated transport	15	4.33526	0.000542693	Q05359, P22803, Q01590, P39704, P36149, P25560, P54837, P41811, P35723, P40509, P38736, P22213, Q07451, Q04410, P53337	ERP1, TRX2, SED5, ERP2, BET3, RER1, ERV25, SEC27, YET1, SEC28, GOS1, SLY1, YET3, GRH1, ERV29	324	89	5557	2.89066	0.337326	0.128167	0.823943
UP_KEYWORDS	Golgi apparatus	22	6.35838	0.00450139	P40056, P38166, P46989, P22803, Q01590, P50108, Q12402, P11655, Q05029, P36149, P25560, P40527, P54837, P41811, Q92331, P40509, P38736, P31755, P19146, Q04410, P40107, P39010	GET2, SFT2, ATG27, TRX2, SED5, MNN10, YOP1, SEC12, BCH1, BET3, RER1, NEO1, ERV25, SEC27, VPS5, SEC28, GOS1, OCH1, ARF2, GRH1, VRG4, AKR1	346	195	5914	1.92838	0.614008	0.0544574	5.54467
GOTERM_CC_DIRECT	GO:0005794~Golgi apparatus	24	6.93642	0.0115988	P40056, P38166, P46989, P22803, Q01590, P50108, Q12402, P11655, Q05029, P36149, P25560, P40527, P54837, P41811, Q92331, P40509, Q99260, P38736, P31755, P53174, P19146, Q04410, P40107, P39010	GET2, SFT2, ATG27, TRX2, SED5, MNN10, YOP1, SEC12, BCH1, BET3, RER1, NEO1, ERV25, SEC27, VPS5, SEC28, YPT6, GOS1, OCH1, PRM8, ARF2, GRH1, VRG4, AKR1	344	238	5861	1.7181	0.943958	0.155921	14.0387
Annotation Cluster 5	Enrichment Score: 2.341077226438916
Category	Term	Count	%	PValue	Genes/Uniprot	Gene Names	List Total	Pop Hits	Pop Total	Fold Enrichment	Bonferroni	Benjamini	FDR
UP_KEYWORDS	Transport	72	20.8092	0.000843372	P40056, Q05359, Q12233, P46989, P48360, P22803, P42935, Q05029, P36149, P36147, P50111, Q12480, P38636, P42839, P35723, P31787, P39109, P21825, Q99260, P00830, P53067, P38736, P40474, P36095, P40107, P38932, P09457, Q02647, P20107, P38166, P39929, P14904, P39704, Q01590, Q08299, P32913, P11655, P06704, P36036, Q92331, P00128, P25372, P40509, P25373, Q08199, P22213, P53174, Q04410, P05626, Q03516,…	GET2, ERP1, ATP20, ATG27, ARH1, TRX2, ELP2, BCH1, BET3, PAM17, ZDS1, AIM45, ATX1, VNX1, YET1, ACB1, YCF1, SEC62, YPT6, ATP2, KAP114, GOS1, QDR2, VPS24, VRG4, VPS45, ATP5, DYN2, ZRC1, SFT2, SNF7, LAP4, ERP2, SED5, ENB1, VPS17, SEC12, CDC31, YRA2, VPS5, QCR7, TRX3, SEC28, GRX1, SIL1, SLY1, PRM8, GRH1, ATP4, RSN1, FTH1, ERV25, SMF3, SFH5, NTF2, SEC72, YET3, MIR1, ARF2, CTR1, ATP7, DET1, NEO1, SEC27,…	346	853	5914	1.44274	0.16308	0.0176451	1.06112
GOTERM_BP_DIRECT	GO:0006810~transport	66	19.0751	0.00452673	P40056, Q05359, Q12233, P46989, P42935, Q05029, P36149, P36147, P50111, P38636, P42839, P35723, P39109, P31787, P21825, Q99260, P00830, P53067, P38736, P40474, P36095, P40107, P38932, P09457, Q02647, P20107, P38166, P39929, P14904, P39704, Q01590, P32913, Q08299, P11655, P06704, P36036, Q92331, P40509, Q08199, P22213, P53174, Q04410, P05626, Q03516, P38310, P54837, Q12078, P47008, P33331, P39742,…	GET2, ERP1, ATP20, ATG27, ELP2, BCH1, BET3, PAM17, ZDS1, ATX1, VNX1, YET1, YCF1, ACB1, SEC62, YPT6, ATP2, KAP114, GOS1, QDR2, VPS24, VRG4, VPS45, ATP5, DYN2, ZRC1, SFT2, SNF7, LAP4, ERP2, SED5, VPS17, ENB1, SEC12, CDC31, YRA2, VPS5, SEC28, SIL1, SLY1, PRM8, GRH1, ATP4, RSN1, FTH1, ERV25, SMF3, SFH5, NTF2, SEC72, YET3, MIR1, ARF2, CTR1, ATP7, DET1, NEO1, SEC27, NCR1, MOG1, DID2, AAC1, PMC1, YPT7, …	324	822	5557	1.37711	0.967905	0.317585	6.68131
UP_KEYWORDS	Protein transport	35	10.1156	0.0105824	Q05359, P46989, P22803, P42935, Q05029, P36147, P54837, P35723, P21825, Q99260, P53067, P38736, P33331, P39742, Q07451, P19146, P36095, P38932, P38166, P14904, P39929, P39704, Q01590, P32913, P11655, P06704, P40527, P41811, P47123, Q92331, P69771, P40509, Q08199, P22213, P32939	ERP1, ATG27, TRX2, ELP2, BCH1, PAM17, ERV25, YET1, SEC62, YPT6, KAP114, GOS1, NTF2, SEC72, YET3, ARF2, VPS24, VPS45, SFT2, LAP4, SNF7, ERP2, SED5, VPS17, SEC12, CDC31, NEO1, SEC27, MOG1, VPS5, DID2, SEC28, SIL1, SLY1, YPT7	346	389	5914	1.53788	0.894049	0.106169	12.586
GOTERM_BP_DIRECT	GO:0015031~protein transport	35	10.1156	0.010698	Q05359, P46989, P22803, P42935, Q05029, P36147, P54837, P35723, P21825, Q99260, P53067, P38736, P33331, P39742, Q07451, P19146, P36095, P38932, P38166, P14904, P39929, P39704, Q01590, P32913, P11655, P06704, P40527, P41811, P47123, Q92331, P69771, P40509, Q08199, P22213, P32939	ERP1, ATG27, TRX2, ELP2, BCH1, PAM17, ERV25, YET1, SEC62, YPT6, KAP114, GOS1, NTF2, SEC72, YET3, ARF2, VPS24, VPS45, SFT2, LAP4, SNF7, ERP2, SED5, VPS17, SEC12, CDC31, NEO1, SEC27, MOG1, VPS5, DID2, SEC28, SIL1, SLY1, YPT7	324	391	5557	1.53528	0.999712	0.380954	15.1199
Annotation Cluster 6	Enrichment Score: 1.8810760295775384
Category	Term	Count	%	PValue	Genes/Uniprot	Gene Names	List Total	Pop Hits	Pop Total	Fold Enrichment	Bonferroni	Benjamini	FDR
GOTERM_CC_DIRECT	GO:0030479~actin cortical patch	13	3.75723	0.000145032	P47068, P36006, P38339, P15891, P39743, P25369, P40563, P53250, P38328, P32381, P32793, P53731, P25343	BBC1, MYO3, RGD1, ABP1, RVS167, LSB5, AIM21, TWF1, ARC40, ARP2, YSC84, ARC35, RVS161	344	60	5861	3.69152	0.0351914	0.00891639	0.18789
GOTERM_BP_DIRECT	GO:0051666~actin cortical patch localization	5	1.44509	0.00917096	P36006, P39743, P25369, P32793, P25343	MYO3, RVS167, LSB5, YSC84, RVS161	324	15	5557	5.71708	0.999073	0.353692	13.1008
UP_SEQ_FEATURE	domain:SH3	5	1.44509	0.026827	P47068, P36006, P15891, P39743, P32793	BBC1, MYO3, ABP1, RVS167, YSC84	346	20	5872	4.24277	1	0.753516	33.7487
UP_KEYWORDS	SH3 domain	5	1.44509	0.0417873	P47068, P36006, P15891, P39743, P32793	BBC1, MYO3, ABP1, RVS167, YSC84	346	23	5914	3.71576	0.999877	0.259346	41.7081
INTERPRO	IPR001452:Src homology-3 domain	5	1.44509	0.0579697	P47068, P36006, P15891, P39743, P32793	BBC1, MYO3, ABP1, RVS167, YSC84	329	23	5053	3.33884	1	0.979246	58.4688
SMART	SM00326:SH3	5	1.44509	0.0598201	P47068, P36006, P15891, P39743, P32793	BBC1, MYO3, ABP1, RVS167, YSC84	118	23	1776	3.27192	0.995872	0.995872	48.8086
Annotation Cluster 7	Enrichment Score: 1.844802254616813
Category	Term	Count	%	PValue	Genes/Uniprot	Gene Names	List Total	Pop Hits	Pop Total	Fold Enrichment	Bonferroni	Benjamini	FDR
UP_KEYWORDS	Redox-active center	8	2.31214	0.000695016	P25372, P34227, P40581, P22803, P40557, P17967, Q99316, P25373	TRX3, PRX1, HYR1, TRX2, EPS1, PDI1, MPD2, GRX1	346	27	5914	5.06444	0.136446	0.0161678	0.875216
UP_KEYWORDS	Disulfide bond	14	4.04624	0.00161193	Q01519, P17967, P22803, P38836, Q12284, P25372, P40581, P40557, P07267, Q99316, P25373, Q99220, P48439, Q03667	COX12, PDI1, TRX2, ECM14, ERV2, TRX3, HYR1, EPS1, PEP4, MPD2, GRX1, YOS9, OST3, MIX17	346	88	5914	2.71926	0.288508	0.0240205	2.01907
GOTERM_BP_DIRECT	GO:0045454~cell redox homeostasis	8	2.31214	0.00241451	P25372, P34227, P22803, P40557, P17967, Q99316, P25373, P39109	TRX3, PRX1, TRX2, EPS1, PDI1, MPD2, GRX1, YCF1	324	33	5557	4.15788	0.839973	0.230315	3.61742
INTERPRO	IPR013766:Thioredoxin domain	6	1.7341	0.00268973	P25372, P34227, P22803, P40557, P17967, Q99316	TRX3, PRX1, TRX2, EPS1, PDI1, MPD2	329	16	5053	5.7595	0.792562	0.792562	3.88566
UP_SEQ_FEATURE	disulfide bond	11	3.17919	0.00378832	P25372, P40581, P22803, P40557, P07267, P17967, Q01519, Q99316, P38836, P25373, Q12284	TRX3, HYR1, TRX2, EPS1, PEP4, PDI1, COX12, MPD2, ECM14, GRX1, ERV2	346	64	5872	2.91691	0.935208	0.421498	5.58452
INTERPRO	IPR017937:Thioredoxin, conserved site	4	1.15607	0.00467776	P25372, P22803, P40557, P17967	TRX3, TRX2, EPS1, PDI1	329	6	5053	10.2391	0.935315	0.745667	6.66667
GOTERM_MF_DIRECT	GO:0015035~protein disulfide oxidoreductase activity	6	1.7341	0.00585551	P25372, P22803, P17967, Q99316, P25373, Q12284	TRX3, TRX2, PDI1, MPD2, GRX1, ERV2	283	21	4885	4.93185	0.912593	0.456266	7.9052
UP_SEQ_FEATURE	domain:Thioredoxin	5	1.44509	0.00732058	P25372, P34227, P22803, P40557, Q99316	TRX3, PRX1, TRX2, EPS1, MPD2	346	14	5872	6.06111	0.994996	0.530831	10.5279
GOTERM_MF_DIRECT	GO:0003756~protein disulfide isomerase activity	4	1.15607	0.00857835	P40557, P17967, Q99316, Q12284	EPS1, PDI1, MPD2, ERV2	283	8	4885	8.63074	0.971995	0.510844	11.3799
INTERPRO	IPR012336:Thioredoxin-like fold	9	2.60116	0.00980042	P25372, P34227, P40581, P22803, P40557, P17967, P36156, Q99316, P25373	TRX3, PRX1, HYR1, TRX2, EPS1, PDI1, ECM4, MPD2, GRX1	329	47	5053	2.94102	0.996823	0.852986	13.4909
UP_SEQ_FEATURE	site:Contributes to redox potential value	3	0.867052	0.0190812	P25372, P22803, P17967	TRX3, TRX2, PDI1	346	4	5872	12.7283	0.999999	0.717131	25.2997
GOTERM_BP_DIRECT	GO:0098869~cellular oxidant detoxification	6	1.7341	0.0241189	P25372, P34227, P40581, P22803, P36156, P25373	TRX3, PRX1, HYR1, TRX2, ECM4, GRX1	324	29	5557	3.54853	1	0.552741	31.072
GOTERM_MF_DIRECT	GO:0015036~disulfide oxidoreductase activity	3	0.867052	0.0738189	P25372, P22803, P25373	TRX3, TRX2, GRX1	283	8	4885	6.47306	1	0.846189	65.8819
GOTERM_MF_DIRECT	GO:0016853~isomerase activity	5	1.44509	0.534568	P40557, P17967, P32352, Q99316, P22696	EPS1, PDI1, ERG2, MPD2, ESS1	283	66	4885	1.30769	1	0.997765	99.9978
UP_KEYWORDS	Isomerase	5	1.44509	0.542837	P40557, P17967, P32352, Q99316, P22696	EPS1, PDI1, ERG2, MPD2, ESS1	346	66	5914	1.29489	1	0.892665	99.995
GOTERM_BP_DIRECT	GO:0006457~protein folding	6	1.7341	0.664108	P25372, P43613, P22803, P17967, Q99316, P39101	TRX3, ERJ5, TRX2, PDI1, MPD2, CAJ1	324	96	5557	1.07195	1	0.999898	100
Annotation Cluster 8	Enrichment Score: 1.843958300607684
Category	Term	Count	%	PValue	Genes/Uniprot	Gene Names	List Total	Pop Hits	Pop Total	Fold Enrichment	Bonferroni	Benjamini	FDR
GOTERM_MF_DIRECT	GO:0046933~proton-transporting ATP synthase activity, rotational mechanism	7	2.02312	0.000252722	Q12233, P09457, P00830, P30902, P38077, P07251, P05626	ATP20, ATP5, ATP2, ATP7, ATP3, ATP1, ATP4	283	17	4885	7.10767	0.0995792	0.0510949	0.353804
GOTERM_BP_DIRECT	GO:0015986~ATP synthesis coupled proton transport	7	2.02312	0.000711631	Q12233, P09457, P00830, P30902, P38077, P07251, P05626	ATP20, ATP5, ATP2, ATP7, ATP3, ATP1, ATP4	324	20	5557	6.00293	0.417023	0.126199	1.07914
UP_KEYWORDS	Ion transport	17	4.91329	0.00104206	P09457, Q12233, P20107, Q08299, Q03516, P38310, P49573, P30902, P38636, P42839, Q12078, P00830, P38929, P40474, P38077, P07251, P05626	ATP5, ATP20, ZRC1, ENB1, RSN1, FTH1, CTR1, ATP7, ATX1, VNX1, SMF3, ATP2, PMC1, QDR2, ATP3, ATP1, ATP4	346	116	5914	2.50493	0.197473	0.0198004	1.30959
UP_KEYWORDS	ATP synthesis	6	1.7341	0.0012113	Q12233, P09457, P00830, P30902, P38077, P07251	ATP20, ATP5, ATP2, ATP7, ATP3, ATP1	346	15	5914	6.83699	0.225656	0.0210861	1.52079
GOTERM_BP_DIRECT	GO:0006811~ion transport	17	4.91329	0.00131271	P09457, Q12233, P20107, Q08299, Q03516, P38310, P49573, P30902, P38636, P42839, Q12078, P00830, P38929, P40474, P38077, P07251, P05626	ATP5, ATP20, ZRC1, ENB1, RSN1, FTH1, CTR1, ATP7, ATX1, VNX1, SMF3, ATP2, PMC1, QDR2, ATP3, ATP1, ATP4	324	119	5557	2.45018	0.630531	0.180563	1.98214
GOTERM_BP_DIRECT	GO:0006754~ATP biosynthetic process	6	1.7341	0.00222671	Q12233, P09457, P00830, P30902, P38077, P07251	ATP20, ATP5, ATP2, ATP7, ATP3, ATP1	324	17	5557	6.05338	0.815431	0.245441	3.34051
GOTERM_CC_DIRECT	GO:0000274~mitochondrial proton-transporting ATP synthase, stator stalk	3	0.867052	0.00984885	P09457, P30902, P05626	ATP5, ATP7, ATP4	344	3	5861	17.0378	0.91325	0.150393	12.0442
UP_KEYWORDS	Hydrogen ion transport	7	2.02312	0.0166098	Q12233, P09457, P00830, P30902, P38077, P07251, P05626	ATP20, ATP5, ATP2, ATP7, ATP3, ATP1, ATP4	346	36	5914	3.32354	0.970815	0.136925	19.0852
KEGG_PATHWAY	sce00190:Oxidative phosphorylation	10	2.89017	0.0219094	P00128, Q12233, P09457, P00425, Q01519, P00830, P30902, P38077, P07251, P05626	QCR7, ATP20, ATP5, COX5B, COX12, ATP2, ATP7, ATP3, ATP1, ATP4	129	72	2194	2.36219	0.773328	0.169337	20.3245
UP_KEYWORDS	CF(1)	3	0.867052	0.0301684	P00830, P38077, P07251	ATP2, ATP3, ATP1	346	5	5914	10.2555	0.998441	0.199789	32.1123
GOTERM_CC_DIRECT	GO:0045261~proton-transporting ATP synthase complex, catalytic core F(1)	3	0.867052	0.0303494	P00830, P38077, P07251	ATP2, ATP3, ATP1	344	5	5861	10.2227	0.999506	0.330118	32.9422
GOTERM_MF_DIRECT	GO:0046961~proton-transporting ATPase activity, rotational mechanism	4	1.15607	0.117511	P00830, P38077, P07251, P05626	ATP2, ATP3, ATP1, ATP4	283	21	4885	3.2879	1	0.895188	82.6741
UP_KEYWORDS	CF(0)	3	0.867052	0.131829	Q12233, P30902, P05626	ATP20, ATP7, ATP4	346	11	5914	4.66159	1	0.553437	83.2608
GOTERM_CC_DIRECT	GO:0045263~proton-transporting ATP synthase complex, coupling factor F(o)	3	0.867052	0.132525	Q12233, P30902, P05626	ATP20, ATP7, ATP4	344	11	5861	4.64667	1	0.622972	84.1722
GOTERM_CC_DIRECT	GO:0000276~mitochondrial proton-transporting ATP synthase complex, coupling factor F(o)	3	0.867052	0.153142	Q12233, P30902, P05626	ATP20, ATP7, ATP4	344	12	5861	4.25945	1	0.660555	88.4129
GOTERM_MF_DIRECT	GO:0015078~hydrogen ion transmembrane transporter activity	3	0.867052	0.235134	Q12233, P30902, P05626	ATP20, ATP7, ATP4	283	16	4885	3.23653	1	0.975476	97.669
GOTERM_BP_DIRECT	GO:0015992~proton transport	7	2.02312	0.279224	Q12233, P09457, P00830, P30902, P38077, P07251, P05626	ATP20, ATP5, ATP2, ATP7, ATP3, ATP1, ATP4	324	76	5557	1.57972	1	0.98174	99.3197
Annotation Cluster 9	Enrichment Score: 1.8062265560015063
Category	Term	Count	%	PValue	Genes/Uniprot	Gene Names	List Total	Pop Hits	Pop Total	Fold Enrichment	Bonferroni	Benjamini	FDR
GOTERM_CC_DIRECT	GO:0030479~actin cortical patch	13	3.75723	0.000145032	P47068, P36006, P38339, P15891, P39743, P25369, P40563, P53250, P38328, P32381, P32793, P53731, P25343	BBC1, MYO3, RGD1, ABP1, RVS167, LSB5, AIM21, TWF1, ARC40, ARP2, YSC84, ARC35, RVS161	344	60	5861	3.69152	0.0351914	0.00891639	0.18789
GOTERM_MF_DIRECT	GO:0003779~actin binding	8	2.31214	0.00935281	P36006, P15891, P39743, P41697, P53250, P38328, P32381, P53731	MYO3, ABP1, RVS167, BUD6, TWF1, ARC40, ARP2, ARC35	283	42	4885	3.2879	0.979752	0.477927	12.3457
UP_KEYWORDS	Actin-binding	7	2.02312	0.0109355	P36006, P15891, P39743, P53250, P38328, P32381, P53731	MYO3, ABP1, RVS167, TWF1, ARC40, ARP2, ARC35	346	33	5914	3.62568	0.901737	0.100089	12.9796
GOTERM_MF_DIRECT	GO:0051015~actin filament binding	5	1.44509	0.017481	P15891, P53250, P38328, P32793, P53731	ABP1, TWF1, ARC40, YSC84, ARC35	283	18	4885	4.79486	0.999337	0.599422	21.9094
UP_KEYWORDS	Cytoskeleton	15	4.33526	0.0515235	Q02647, P15891, P06704, P39743, P25369, P53250, P53731, P06787, P47068, P36006, P40563, P38328, P32793, P32381, P25343	DYN2, ABP1, CDC31, RVS167, LSB5, TWF1, ARC35, CMD1, BBC1, MYO3, AIM21, ARC40, YSC84, ARP2, RVS161	346	149	5914	1.72072	0.999986	0.286967	48.7695
GOTERM_BP_DIRECT	GO:0034314~Arp2/3 complex-mediated actin nucleation	3	0.867052	0.0582402	P38328, P32381, P53731	ARC40, ARP2, ARC35	324	7	5557	7.35053	1	0.758617	59.9304
GOTERM_CC_DIRECT	GO:0005856~cytoskeleton	15	4.33526	0.0603044	Q02647, P15891, P06704, P39743, P25369, P53250, P53731, P06787, P47068, P36006, P40563, P38328, P32793, P32381, P25343	DYN2, ABP1, CDC31, RVS167, LSB5, TWF1, ARC35, CMD1, BBC1, MYO3, AIM21, ARC40, YSC84, ARP2, RVS161	344	152	5861	1.68136	1	0.422292	55.3579
GOTERM_CC_DIRECT	GO:0005885~Arp2/3 protein complex	3	0.867052	0.075648	P38328, P32381, P53731	ARC40, ARP2, ARC35	344	8	5861	6.38917	1	0.46568	63.939
Annotation Cluster 10	Enrichment Score: 1.5837822056880875
Category	Term	Count	%	PValue	Genes/Uniprot	Gene Names	List Total	Pop Hits	Pop Total	Fold Enrichment	Bonferroni	Benjamini	FDR
GOTERM_CC_DIRECT	GO:0045121~membrane raft	8	2.31214	0.000321454	Q05050, P53278, P38234, Q12335, P40485, P25349, P53885, P25343	EIS1, YGR130C, RFS1, PST2, SLM1, YCP4, MDG1, RVS161	344	24	5861	5.67926	0.0763406	0.0131481	0.416006
GOTERM_MF_DIRECT	GO:0003955~NAD(P)H dehydrogenase (quinone) activity	3	0.867052	0.0295653	P38234, Q12335, P25349	RFS1, PST2, YCP4	283	5	4885	10.3569	0.999996	0.749387	34.3504
UP_SEQ_FEATURE	domain:Flavodoxin-like	3	0.867052	0.0593874	P38234, Q12335, P25349	RFS1, PST2, YCP4	346	7	5872	7.27333	1	0.925474	60.424
INTERPRO	IPR008254:Flavodoxin/nitric oxide synthase	3	0.867052	0.0709911	P38234, Q12335, P25349	RFS1, PST2, YCP4	329	7	5053	6.58228	1	0.972226	66.1604
GOTERM_MF_DIRECT	GO:0010181~FMN binding	3	0.867052	0.300809	P38234, Q12335, P25349	RFS1, PST2, YCP4	283	19	4885	2.7255	1	0.979917	99.3381
Annotation Cluster 11	Enrichment Score: 1.4718292705339113
Category	Term	Count	%	PValue	Genes/Uniprot	Gene Names	List Total	Pop Hits	Pop Total	Fold Enrichment	Bonferroni	Benjamini	FDR
KEGG_PATHWAY	sce00020:Citrate cycle (TCA cycle)	8	2.31214	0.0019273	P17505, P08417, P53312, P53598, P00890, P28241, P11154, P28834	MDH1, FUM1, LSC2, LSC1, CIT1, IDH2, PYC1, IDH1	129	32	2194	4.25194	0.121249	0.0421697	1.95916
UP_KEYWORDS	Tricarboxylic acid cycle	7	2.02312	0.00259198	P17505, P08417, P53312, P53598, P00890, P28241, P28834	MDH1, FUM1, LSC2, LSC1, CIT1, IDH2, IDH1	346	25	5914	4.7859	0.421674	0.0358495	3.22825
KEGG_PATHWAY	sce01200:Carbon metabolism	15	4.33526	0.00535066	P17505, P53312, P53598, P00890, P28241, P37291, P54838, P06106, P48015, P08417, P11154, P52489, P28834, P42938, P46151	MDH1, LSC2, LSC1, CIT1, IDH2, SHM2, DAK1, MET17, GCV1, FUM1, PYC1, PYK2, IDH1, TDA10, MET12	129	114	2194	2.23786	0.301945	0.0859447	5.35389
GOTERM_BP_DIRECT	GO:0006099~tricarboxylic acid cycle	7	2.02312	0.00786933	P17505, P08417, P53312, P53598, P00890, P28241, P28834	MDH1, FUM1, LSC2, LSC1, CIT1, IDH2, IDH1	324	31	5557	3.87286	0.997493	0.348028	11.3446
GOTERM_BP_DIRECT	GO:0006537~glutamate biosynthetic process	4	1.15607	0.022641	P00890, P28241, P07275, P28834	CIT1, IDH2, PUT2, IDH1	324	11	5557	6.23681	1	0.545725	29.4638
KEGG_PATHWAY	sce01110:Biosynthesis of secondary metabolites	23	6.6474	0.130851	Q05788, P17505, P53312, P53598, P00890, P32353, P28241, P37291, P36148, P06106, P49017, P40012, P48015, P54113, Q03778, P08417, P41911, P52489, P28834, Q00055, P42938, Q99190, P32347	PNP1, MDH1, LSC2, LSC1, CIT1, ERG3, IDH2, SHM2, GPT2, MET17, COQ5, HEM14, GCV1, ADE16, FMN1, FUM1, GPD2, PYK2, IDH1, GPD1, TDA10, TSC13, HEM12	129	296	2194	1.32155	0.999917	0.488881	76.2682
KEGG_PATHWAY	sce01130:Biosynthesis of antibiotics	17	4.91329	0.200586	Q12452, P17505, P53312, P53598, P00890, P32352, P43123, P32353, P28241, P37291, P06106, P48015, P54113, P08417, P52489, P28834, P42938	ERG27, MDH1, LSC2, LSC1, CIT1, ERG2, QRI1, ERG3, IDH2, SHM2, MET17, GCV1, ADE16, FUM1, PYK2, IDH1, TDA10	129	219	2194	1.32024	1	0.565396	89.9354
KEGG_PATHWAY	sce01210:2-Oxocarboxylic acid metabolism	3	0.867052	0.61568	P00890, P28241, P28834	CIT1, IDH2, IDH1	129	35	2194	1.45781	1	0.922914	99.9945
KEGG_PATHWAY	sce01230:Biosynthesis of amino acids	7	2.02312	0.736681	P00890, P28241, P11154, P37291, P52489, P28834, P06106	CIT1, IDH2, PYC1, SHM2, PYK2, IDH1, MET17	129	123	2194	0.967921	1	0.96353	99.9999
Annotation Cluster 12	Enrichment Score: 1.4248805589715723
Category	Term	Count	%	PValue	Genes/Uniprot	Gene Names	List Total	Pop Hits	Pop Total	Fold Enrichment	Bonferroni	Benjamini	FDR
UP_KEYWORDS	NAD	14	4.04624	0.00355514	P40215, P17505, P28241, P53720, P53839, P21373, Q06892, P32614, P41911, P07275, P28834, Q00055, P40471, P36060	NDE1, MDH1, IDH2, SMM1, GOR1, UTR1, POS5, FRD1, GPD2, PUT2, IDH1, GPD1, AYR1, MCR1	346	96	5914	2.49265	0.528328	0.0458811	4.40318
GOTERM_MF_DIRECT	GO:0016616~oxidoreductase activity, acting on the CH-OH group of donors, NAD or NADP as acceptor	6	1.7341	0.0106127	P17505, P28241, P41911, Q00055, P28834, P53839	MDH1, IDH2, GPD2, GPD1, IDH1, GOR1	283	24	4885	4.31537	0.988059	0.46876	13.896
GOTERM_MF_DIRECT	GO:0051287~NAD binding	5	1.44509	0.0746936	P28241, P41911, Q00055, P28834, P53839	IDH2, GPD2, GPD1, IDH1, GOR1	283	28	4885	3.08241	1	0.833008	66.331
UP_SEQ_FEATURE	nucleotide phosphate-binding region:NAD	6	1.7341	0.148943	P40215, P17505, P07275, P41911, Q00055, P53839	NDE1, MDH1, PUT2, GPD2, GPD1, GOR1	346	48	5872	2.12139	1	0.99045	91.2993
UP_SEQ_FEATURE	binding site:NAD	4	1.15607	0.178901	P17505, P41911, Q00055, P53839	MDH1, GPD2, GPD1, GOR1	346	25	5872	2.71538	1	0.991237	94.9426
Annotation Cluster 13	Enrichment Score: 1.2852923896729995
Category	Term	Count	%	PValue	Genes/Uniprot	Gene Names	List Total	Pop Hits	Pop Total	Fold Enrichment	Bonferroni	Benjamini	FDR
GOTERM_BP_DIRECT	GO:0006487~protein N-linked glycosylation	7	2.02312	0.0209921	P50108, P14020, P39007, P31755, P16661, P48439, Q02795	MNN10, DPM1, STT3, OCH1, ALG1, OST3, SWP1	324	38	5557	3.15944	1	0.535029	27.6281
UP_KEYWORDS	Glycosyltransferase	11	3.17919	0.0217557	Q05788, P50108, P14020, P39007, P43619, P31382, P33775, P31755, P16661, P48439, Q02795	PNP1, MNN10, DPM1, STT3, BNA6, PMT2, PMT1, OCH1, ALG1, OST3, SWP1	346	83	5914	2.26527	0.990353	0.16348	24.2787
KEGG_PATHWAY	sce00513:Various types of N-glycan biosynthesis	6	1.7341	0.0274158	P50108, P39007, P31755, P16661, P48439, Q02795	MNN10, STT3, OCH1, ALG1, OST3, SWP1	129	30	2194	3.40155	0.844717	0.186936	24.8069
GOTERM_BP_DIRECT	GO:0006486~protein glycosylation	9	2.60116	0.0307801	P22023, P14020, P39007, P31382, P33775, P16661, P48439, P40107, Q02795	KRE5, DPM1, STT3, PMT2, PMT1, ALG1, OST3, VRG4, SWP1	324	64	5557	2.41189	1	0.612453	37.9047
GOTERM_MF_DIRECT	GO:0016757~transferase activity, transferring glycosyl groups	11	3.17919	0.0312412	Q05788, P50108, P14020, P39007, P43619, P31382, P33775, P31755, P16661, P48439, Q02795	PNP1, MNN10, DPM1, STT3, BNA6, PMT2, PMT1, OCH1, ALG1, OST3, SWP1	283	89	4885	2.13344	0.999998	0.732114	35.9225
GOTERM_BP_DIRECT	GO:0035269~protein O-linked mannosylation	4	1.15607	0.0360085	P14020, P31382, P33775, P48439	DPM1, PMT2, PMT1, OST3	324	13	5557	5.2773	1	0.656701	42.8185
GOTERM_MF_DIRECT	GO:0004579~dolichyl-diphosphooligosaccharide-protein glycotransferase activity	3	0.867052	0.0575087	P39007, P48439, Q02795	STT3, OST3, SWP1	283	7	4885	7.39778	1	0.80576	56.419
KEGG_PATHWAY	sce00510:N-Glycan biosynthesis	5	1.44509	0.093532	P14020, P39007, P16661, P48439, Q02795	DPM1, STT3, ALG1, OST3, SWP1	129	30	2194	2.83463	0.998611	0.397161	63.4747
GOTERM_CC_DIRECT	GO:0008250~oligosaccharyltransferase complex	3	0.867052	0.0936016	P39007, P48439, Q02795	STT3, OST3, SWP1	344	9	5861	5.67926	1	0.520774	72.0367
GOTERM_BP_DIRECT	GO:0097502~mannosylation	3	0.867052	0.642786	P50108, P31755, P16661	MNN10, OCH1, ALG1	324	37	5557	1.39064	1	0.999844	100
Annotation Cluster 14	Enrichment Score: 1.2190445132518914
Category	Term	Count	%	PValue	Genes/Uniprot	Gene Names	List Total	Pop Hits	Pop Total	Fold Enrichment	Bonferroni	Benjamini	FDR
GOTERM_CC_DIRECT	GO:0030134~ER to Golgi transport vesicle	6	1.7341	0.00935204	Q05359, P39704, P25560, P22213, P54837, P53337	ERP1, ERP2, RER1, SLY1, ERV25, ERV29	344	23	5861	4.44464	0.901807	0.152762	11.4703
UP_SEQ_FEATURE	domain:GOLD	3	0.867052	0.076176	Q05359, P39704, P54837	ERP1, ERP2, ERV25	346	8	5872	6.36416	1	0.934149	69.8692
INTERPRO	IPR015720:TMP21-related	3	0.867052	0.0906955	Q05359, P39704, P54837	ERP1, ERP2, ERV25	329	8	5053	5.7595	1	0.975316	75.3155
SMART	SM01190:SM01190	3	0.867052	0.0928119	Q05359, P39704, P54837	ERP1, ERP2, ERV25	118	8	1776	5.64407	0.999828	0.944407	65.263
INTERPRO	IPR009038:GOLD	3	0.867052	0.133925	Q05359, P39704, P54837	ERP1, ERP2, ERV25	329	10	5053	4.6076	1	0.987959	87.9455
Annotation Cluster 15	Enrichment Score: 1.181544029314629
Category	Term	Count	%	PValue	Genes/Uniprot	Gene Names	List Total	Pop Hits	Pop Total	Fold Enrichment	Bonferroni	Benjamini	FDR
UP_SEQ_FEATURE	domain:EF-hand 1	4	1.15607	0.023303	P06787, P25296, P06704, P39931	CMD1, CNB1, CDC31, SSP120	346	11	5872	6.17131	1	0.729563	30.022
UP_SEQ_FEATURE	domain:EF-hand 2	4	1.15607	0.023303	P06787, P25296, P06704, P39931	CMD1, CNB1, CDC31, SSP120	346	11	5872	6.17131	1	0.729563	30.022
UP_SEQ_FEATURE	domain:EF-hand 4	3	0.867052	0.0441032	P06787, P25296, P06704	CMD1, CNB1, CDC31	346	6	5872	8.48555	1	0.885601	49.4854
UP_SEQ_FEATURE	domain:EF-hand 3	3	0.867052	0.0593874	P06787, P25296, P06704	CMD1, CNB1, CDC31	346	7	5872	7.27333	1	0.925474	60.424
UP_KEYWORDS	Calcium	6	1.7341	0.061673	P06787, Q12466, P25296, Q03516, P06704, P38929	CMD1, TCB1, CNB1, RSN1, CDC31, PMC1	346	37	5914	2.77175	0.999999	0.326351	55.2851
SMART	SM00054:EFh	3	0.867052	0.0726653	P06787, P25296, P06704	CMD1, CNB1, CDC31	118	7	1776	6.45036	0.998786	0.965164	55.9098
GOTERM_MF_DIRECT	GO:0005509~calcium ion binding	5	1.44509	0.0746936	P06787, P32356, P25296, P06704, P39931	CMD1, NTH1, CNB1, CDC31, SSP120	283	28	4885	3.08241	1	0.833008	66.331
INTERPRO	IPR002048:EF-hand domain	4	1.15607	0.0808944	P06787, P25296, P06704, P39931	CMD1, CNB1, CDC31, SSP120	329	16	5053	3.83967	1	0.977392	71.0974
UP_SEQ_FEATURE	calcium-binding region:1	3	0.867052	0.0942408	P06787, P25296, P06704	CMD1, CNB1, CDC31	346	9	5872	5.65703	1	0.960989	77.656
UP_SEQ_FEATURE	calcium-binding region:2	3	0.867052	0.0942408	P06787, P25296, P06704	CMD1, CNB1, CDC31	346	9	5872	5.65703	1	0.960989	77.656
INTERPRO	IPR011992:EF-hand-like domain	4	1.15607	0.107279	P06787, P25296, P06704, P39931	CMD1, CNB1, CDC31, SSP120	329	18	5053	3.41304	1	0.979726	81.172
INTERPRO	IPR018247:EF-Hand 1, calcium-binding site	3	0.867052	0.180663	P06787, P25296, P06704	CMD1, CNB1, CDC31	329	12	5053	3.83967	1	0.996079	94.6712
Annotation Cluster 16	Enrichment Score: 1.1088881370421024
Category	Term	Count	%	PValue	Genes/Uniprot	Gene Names	List Total	Pop Hits	Pop Total	Fold Enrichment	Bonferroni	Benjamini	FDR
UP_KEYWORDS	Flavoprotein	10	2.89017	0.0251377	P40215, Q03778, P48360, P32614, Q12284, P40012, Q12480, P53720, P36060, P46151	NDE1, FMN1, ARH1, FRD1, ERV2, HEM14, AIM45, SMM1, MCR1, MET12	346	73	5914	2.34144	0.995355	0.174571	27.5229
UP_KEYWORDS	FAD	8	2.31214	0.0464226	P40215, P48360, P32614, Q12284, P40012, Q12480, P36060, P46151	NDE1, ARH1, FRD1, ERV2, HEM14, AIM45, MCR1, MET12	346	57	5914	2.39895	0.999956	0.269066	45.1747
UP_SEQ_FEATURE	nucleotide phosphate-binding region:FAD	5	1.44509	0.115519	P40215, P48360, P40012, Q12480, P36060	NDE1, ARH1, HEM14, AIM45, MCR1	346	32	5872	2.65173	1	0.974972	84.4099
INTERPRO	IPR023753:Pyridine nucleotide-disulphide oxidoreductase, FAD/NAD(P)-binding domain	4	1.15607	0.272106	P40215, P48360, P32614, P40012	NDE1, ARH1, FRD1, HEM14	329	28	5053	2.19409	1	0.999782	99.0659
Annotation Cluster 17	Enrichment Score: 1.1066264697290813
Category	Term	Count	%	PValue	Genes/Uniprot	Gene Names	List Total	Pop Hits	Pop Total	Fold Enrichment	Bonferroni	Benjamini	FDR
GOTERM_CC_DIRECT	GO:0000839~Hrd1p ubiquitin ligase ERAD-L complex	4	1.15607	0.0366534	P38428, Q99220, Q12743, Q04228	CUE1, YOS9, DFM1, UBX2	344	13	5861	5.2424	0.999901	0.330364	38.3802
GOTERM_CC_DIRECT	GO:0000837~Doa10p ubiquitin ligase complex	3	0.867052	0.075648	P38428, Q12743, Q04228	CUE1, DFM1, UBX2	344	8	5861	6.38917	1	0.46568	63.939
GOTERM_BP_DIRECT	GO:0030433~ER-associated ubiquitin-dependent protein catabolic process	6	1.7341	0.172667	P40557, P16474, P38428, Q99220, Q12743, Q04228	EPS1, KAR2, CUE1, YOS9, DFM1, UBX2	324	51	5557	2.01779	1	0.940227	94.4365
Annotation Cluster 18	Enrichment Score: 0.9903552949878609
Category	Term	Count	%	PValue	Genes/Uniprot	Gene Names	List Total	Pop Hits	Pop Total	Fold Enrichment	Bonferroni	Benjamini	FDR
GOTERM_CC_DIRECT	GO:0005811~lipid particle	10	2.89017	0.00370408	Q12452, Q08959, P53252, P30624, P40308, P36148, P34163, Q06522, P40471, Q04228	ERG27, PGC1, PIL1, FAA1, TGL3, GPT2, TGL1, YPR147C, AYR1, UBX2	344	54	5861	3.15515	0.600126	0.0735395	4.6978
UP_KEYWORDS	Lipid metabolism	12	3.46821	0.218171	Q12452, Q08959, P32352, P32353, P30624, P40308, P36148, P40030, P34163, P41734, Q99190, Q12200	ERG27, PGC1, ERG2, ERG3, FAA1, TGL3, GPT2, ERG28, TGL1, IAH1, TSC13, NCR1	346	144	5914	1.42437	1	0.653481	95.5483
GOTERM_BP_DIRECT	GO:0006629~lipid metabolic process	12	3.46821	0.268452	Q12452, Q08959, P32352, P32353, P30624, P40308, P36148, P40030, P34163, P41734, Q99190, Q12200	ERG27, PGC1, ERG2, ERG3, FAA1, TGL3, GPT2, ERG28, TGL1, IAH1, TSC13, NCR1	324	152	5557	1.35404	1	0.979439	99.1471
UP_KEYWORDS	Lipid biosynthesis	6	1.7341	0.503773	Q12452, P32352, P32353, P36148, P40030, Q99190	ERG27, ERG2, ERG3, GPT2, ERG28, TSC13	346	80	5914	1.28194	1	0.882673	99.9858
Annotation Cluster 19	Enrichment Score: 0.9676498555835209
Category	Term	Count	%	PValue	Genes/Uniprot	Gene Names	List Total	Pop Hits	Pop Total	Fold Enrichment	Bonferroni	Benjamini	FDR
UP_KEYWORDS	Nucleosome core	4	1.15607	0.0126997	Q12692, P61830, P02293, P04912	HTZ1, HHT1, HTB1, HTA2	346	9	5914	7.59666	0.932579	0.110639	14.9219
GOTERM_CC_DIRECT	GO:0000786~nucleosome	4	1.15607	0.0128103	Q12692, P61830, P02293, P04912	HTZ1, HHT1, HTB1, HTA2	344	9	5861	7.57235	0.958605	0.162155	15.3949
INTERPRO	IPR007125:Histone core	4	1.15607	0.0169708	Q12692, P61830, P02293, P04912	HTZ1, HHT1, HTB1, HTA2	329	9	5053	6.82607	0.999954	0.864556	22.2647
GOTERM_MF_DIRECT	GO:0046982~protein heterodimerization activity	6	1.7341	0.0435138	Q12692, Q06151, P61830, P02293, P40096, P04912	HTZ1, DCS1, HHT1, HTB1, BUR6, HTA2	283	34	4885	3.04614	1	0.75834	46.4127
INTERPRO	IPR009072:Histone-fold	5	1.44509	0.0661518	Q12692, P61830, P02293, P40096, P04912	HTZ1, HHT1, HTB1, BUR6, HTA2	329	24	5053	3.19972	1	0.981629	63.4719
GOTERM_BP_DIRECT	GO:0006333~chromatin assembly or disassembly	4	1.15607	0.0830594	P61830, P32447, P02293, P04912	HHT1, ASF1, HTB1, HTA2	324	18	5557	3.81139	1	0.838908	73.3294
GOTERM_CC_DIRECT	GO:0000788~nuclear nucleosome	3	0.867052	0.0936016	P61830, P02293, P04912	HHT1, HTB1, HTA2	344	9	5861	5.67926	1	0.520774	72.0367
GOTERM_CC_DIRECT	GO:0031298~replication fork protection complex	3	0.867052	0.474712	P61830, P02293, P04912	HHT1, HTB1, HTA2	344	27	5861	1.89309	1	0.953023	99.9763
UP_KEYWORDS	Chromosome	6	1.7341	0.888006	P11633, Q12692, P17106, P61830, P02293, P04912	NHP6B, HTZ1, CBF1, HHT1, HTB1, HTA2	346	131	5914	0.782862	1	0.993757	100
GOTERM_CC_DIRECT	GO:0005694~chromosome	6	1.7341	0.889655	P11633, Q12692, P17106, P61830, P02293, P04912	NHP6B, HTZ1, CBF1, HHT1, HTB1, HTA2	344	131	5861	0.780357	1	0.999626	100
UP_KEYWORDS	DNA-binding	16	4.62428	0.979237	P11633, P61830, P21657, Q03834, P36036, P02293, P04912, Q12692, P32445, P17106, P20436, P32787, P27705, Q02486, Q06639, P33417	NHP6B, HHT1, DAL81, MSH6, YRA2, HTB1, HTA2, HTZ1, RIM1, CBF1, RPB8, MGM101, MIG1, ABF2, RSC3, IXR1	346	399	5914	0.685413	1	0.99967	100
Annotation Cluster 20	Enrichment Score: 0.9298014352202899
Category	Term	Count	%	PValue	Genes/Uniprot	Gene Names	List Total	Pop Hits	Pop Total	Fold Enrichment	Bonferroni	Benjamini	FDR
GOTERM_BP_DIRECT	GO:0043161~proteasome-mediated ubiquitin-dependent protein catabolic process	8	2.31214	0.0267931	P40303, P06704, P23639, P23638, Q04228, P30656, P43588, P36037	PRE6, CDC31, PRE8, PRE9, UBX2, PRE2, RPN11, DOA1	324	51	5557	2.69039	1	0.575889	33.8954
GOTERM_MF_DIRECT	GO:0004298~threonine-type endopeptidase activity	4	1.15607	0.0431251	P40303, P23639, P23638, P30656	PRE6, PRE8, PRE9, PRE2	283	14	4885	4.93185	1	0.782275	46.1065
UP_KEYWORDS	Threonine protease	4	1.15607	0.044325	P40303, P23639, P23638, P30656	PRE6, PRE8, PRE9, PRE2	346	14	5914	4.88357	0.99993	0.265516	43.6302
GOTERM_BP_DIRECT	GO:0051603~proteolysis involved in cellular protein catabolic process	5	1.44509	0.047366	P40303, P07267, P23639, P23638, P30656	PRE6, PEP4, PRE8, PRE9, PRE2	324	24	5557	3.57317	1	0.718699	52.2683
GOTERM_BP_DIRECT	GO:0010499~proteasomal ubiquitin-independent protein catabolic process	4	1.15607	0.0525926	P40303, P23639, P23638, P30656	PRE6, PRE8, PRE9, PRE2	324	15	5557	4.57366	1	0.744634	56.1074
GOTERM_CC_DIRECT	GO:0005839~proteasome core complex	4	1.15607	0.0535017	P40303, P23639, P23638, P30656	PRE6, PRE8, PRE9, PRE2	344	15	5861	4.54341	0.999999	0.406886	50.9812
INTERPRO	IPR001353:Proteasome, subunit alpha/beta	4	1.15607	0.0578181	P40303, P23639, P23638, P30656	PRE6, PRE8, PRE9, PRE2	329	14	5053	4.38819	1	0.987063	58.3703
GOTERM_CC_DIRECT	GO:0019773~proteasome core complex, alpha-subunit complex	3	0.867052	0.0589667	P40303, P23639, P23638	PRE6, PRE8, PRE9	344	7	5861	7.30191	1	0.426499	54.5269
GOTERM_CC_DIRECT	GO:0034515~proteasome storage granule	5	1.44509	0.0621837	P40303, P23639, P23638, P30656, P43588	PRE6, PRE8, PRE9, PRE2, RPN11	344	26	5861	3.2765	1	0.421211	56.5018
INTERPRO	IPR023332:Proteasome A-type subunit	3	0.867052	0.0709911	P40303, P23639, P23638	PRE6, PRE8, PRE9	329	7	5053	6.58228	1	0.972226	66.1604
INTERPRO	IPR000426:Proteasome, alpha-subunit, N-terminal domain	3	0.867052	0.0709911	P40303, P23639, P23638	PRE6, PRE8, PRE9	329	7	5053	6.58228	1	0.972226	66.1604
SMART	SM00948:SM00948	3	0.867052	0.0726653	P40303, P23639, P23638	PRE6, PRE8, PRE9	118	7	1776	6.45036	0.998786	0.965164	55.9098
GOTERM_CC_DIRECT	GO:0042175~nuclear outer membrane-endoplasmic reticulum membrane network	4	1.15607	0.0734057	P40303, P14020, P23639, P23638	PRE6, DPM1, PRE8, PRE9	344	17	5861	4.00889	1	0.466185	62.7881
GOTERM_MF_DIRECT	GO:0004175~endopeptidase activity	4	1.15607	0.104988	P40303, P23639, P23638, P30656	PRE6, PRE8, PRE9, PRE2	283	20	4885	3.4523	1	0.888302	78.8892
INTERPRO	IPR016050:Proteasome, beta-type subunit, conserved site	3	0.867052	0.11176	P40303, P23638, P30656	PRE6, PRE9, PRE2	329	9	5053	5.11955	1	0.978615	82.5158
KEGG_PATHWAY	sce03050:Proteasome	5	1.44509	0.143566	P40303, P23639, P23638, P30656, P43588	PRE6, PRE8, PRE9, PRE2, RPN11	129	35	2194	2.42968	0.999969	0.499543	79.5972
UP_KEYWORDS	Proteasome	5	1.44509	0.155568	P40303, P23639, P23638, P30656, P43588	PRE6, PRE8, PRE9, PRE2, RPN11	346	36	5914	2.37396	1	0.581132	88.2104
GOTERM_MF_DIRECT	GO:0008237~metallopeptidase activity	5	1.44509	0.162455	P14904, Q08225, P38836, P32454, P43588	LAP4, YOL057W, ECM14, APE2, RPN11	283	37	4885	2.33263	1	0.947284	91.6754
UP_KEYWORDS	Aminopeptidase	3	0.867052	0.216795	P14904, Q08225, P32454	LAP4, YOL057W, APE2	346	15	5914	3.4185	1	0.658418	95.4482
GOTERM_MF_DIRECT	GO:0004177~aminopeptidase activity	3	0.867052	0.278937	P14904, Q08225, P32454	LAP4, YOL057W, APE2	283	18	4885	2.87691	1	0.976946	98.9805
GOTERM_CC_DIRECT	GO:0000502~proteasome complex	5	1.44509	0.281673	P40303, P23639, P23638, P30656, P43588	PRE6, PRE8, PRE9, PRE2, RPN11	344	46	5861	1.85193	1	0.850484	98.629
UP_KEYWORDS	Metalloprotease	4	1.15607	0.302251	P14904, Q08225, P38836, P32454	LAP4, YOL057W, ECM14, APE2	346	33	5914	2.07182	1	0.74232	98.9438
GOTERM_MF_DIRECT	GO:0008233~peptidase activity	11	3.17919	0.452944	P40303, P14904, Q08225, P07267, Q04969, P38836, P32454, P23639, P23638, P30656, P43588	PRE6, LAP4, YOL057W, PEP4, SPC2, ECM14, APE2, PRE8, PRE9, PRE2, RPN11	283	161	4885	1.17936	1	0.996162	99.9788
UP_KEYWORDS	Protease	10	2.89017	0.531656	P40303, P14904, Q08225, P07267, P38836, P32454, P23639, P23638, P30656, P43588	PRE6, LAP4, YOL057W, PEP4, ECM14, APE2, PRE8, PRE9, PRE2, RPN11	346	152	5914	1.12451	1	0.888366	99.9932
GOTERM_BP_DIRECT	GO:0006511~ubiquitin-dependent protein catabolic process	5	1.44509	0.563967	P40303, P23639, P23638, Q08412, P36037	PRE6, PRE8, PRE9, CUE5, DOA1	324	68	5557	1.26112	1	0.99949	99.9997
GOTERM_BP_DIRECT	GO:0006508~proteolysis	11	3.17919	0.577383	P40303, P14904, Q08225, P07267, P38836, P32454, P23639, P23638, P50086, P30656, P43588	PRE6, LAP4, YOL057W, PEP4, ECM14, APE2, PRE8, PRE9, NAS6, PRE2, RPN11	324	176	5557	1.07195	1	0.999538	99.9998
Annotation Cluster 21	Enrichment Score: 0.9023598069074327
Category	Term	Count	%	PValue	Genes/Uniprot	Gene Names	List Total	Pop Hits	Pop Total	Fold Enrichment	Bonferroni	Benjamini	FDR
GOTERM_MF_DIRECT	GO:0004722~protein serine/threonine phosphatase activity	5	1.44509	0.0348814	P32598, P31383, P34221, Q12511, P38797	GLC7, TPD3, PTC3, PTC5, PTC7	283	22	4885	3.92306	1	0.738018	39.2175
UP_SEQ_FEATURE	metal ion-binding site:Manganese 1; via carbonyl oxygen	3	0.867052	0.0441032	P34221, Q12511, P38797	PTC3, PTC5, PTC7	346	6	5872	8.48555	1	0.885601	49.4854
GOTERM_BP_DIRECT	GO:0006470~protein dephosphorylation	7	2.02312	0.0851306	P32598, P31383, P25296, P34221, Q12511, P38797, P19881	GLC7, TPD3, CNB1, PTC3, PTC5, PTC7, PHO13	324	53	5557	2.26526	1	0.838422	74.233
INTERPRO	IPR001932:Protein phosphatase 2C (PP2C)-like	3	0.867052	0.0906955	P34221, Q12511, P38797	PTC3, PTC5, PTC7	329	8	5053	5.7595	1	0.975316	75.3155
SMART	SM00332:PP2Cc	3	0.867052	0.0928119	P34221, Q12511, P38797	PTC3, PTC5, PTC7	118	8	1776	5.64407	0.999828	0.944407	65.263
UP_SEQ_FEATURE	metal ion-binding site:Manganese 2	3	0.867052	0.17541	P34221, Q12511, P38797	PTC3, PTC5, PTC7	346	13	5872	3.91641	1	0.99173	94.6071
UP_SEQ_FEATURE	metal ion-binding site:Manganese 1	3	0.867052	0.17541	P34221, Q12511, P38797	PTC3, PTC5, PTC7	346	13	5872	3.91641	1	0.99173	94.6071
UP_KEYWORDS	Manganese	6	1.7341	0.248576	P32598, P34221, P28241, P28834, Q12511, P38797	GLC7, PTC3, IDH2, IDH1, PTC5, PTC7	346	58	5914	1.76819	1	0.67946	97.304
GOTERM_MF_DIRECT	GO:0004721~phosphoprotein phosphatase activity	5	1.44509	0.260318	P32598, P34221, Q12511, P38797, P19881	GLC7, PTC3, PTC5, PTC7, PHO13	283	45	4885	1.91794	1	0.97745	98.5424
UP_KEYWORDS	Protein phosphatase	4	1.15607	0.431512	P32598, P34221, Q12511, P38797	GLC7, PTC3, PTC5, PTC7	346	41	5914	1.66756	1	0.844637	99.9208
Annotation Cluster 22	Enrichment Score: 0.8509271776556158
Category	Term	Count	%	PValue	Genes/Uniprot	Gene Names	List Total	Pop Hits	Pop Total	Fold Enrichment	Bonferroni	Benjamini	FDR
INTERPRO	IPR023214:HAD-like domain	7	2.02312	0.0686015	P38426, Q99312, P40527, P38929, P38773, P40106, P19881	TPS3, ISN1, NEO1, PMC1, DOG2, HOR2, PHO13	329	45	5053	2.38913	1	0.977019	64.8568
GOTERM_MF_DIRECT	GO:0000287~magnesium ion binding	8	2.31214	0.1072	P33317, Q99312, P28241, P52489, P40527, P28834, P38773, P40106	DUT1, ISN1, IDH2, PYK2, NEO1, IDH1, DOG2, HOR2	283	70	4885	1.97274	1	0.882227	79.609
UP_KEYWORDS	Magnesium	15	4.33526	0.380794	P33317, P28241, P30624, P40527, P38773, Q03778, Q99312, P34221, P52489, P28834, P38929, P40106, Q12511, P38797, P19881	DUT1, IDH2, FAA1, NEO1, DOG2, FMN1, ISN1, PTC3, PYK2, IDH1, PMC1, HOR2, PTC5, PTC7, PHO13	346	216	5914	1.18698	1	0.814667	99.7667
Annotation Cluster 23	Enrichment Score: 0.7511741858175792
Category	Term	Count	%	PValue	Genes/Uniprot	Gene Names	List Total	Pop Hits	Pop Total	Fold Enrichment	Bonferroni	Benjamini	FDR
UP_SEQ_FEATURE	repeat:3	5	1.44509	0.0705903	P19659, P49573, P15891, P22213, P32505	GAL11, CTR1, ABP1, SLY1, NAB2	346	27	5872	3.1428	1	0.928572	66.9898
UP_SEQ_FEATURE	repeat:1	5	1.44509	0.181797	P19659, P49573, P15891, P22213, P32505	GAL11, CTR1, ABP1, SLY1, NAB2	346	38	5872	2.23304	1	0.990596	95.2061
UP_SEQ_FEATURE	repeat:2	5	1.44509	0.206217	P19659, P49573, P15891, P22213, P32505	GAL11, CTR1, ABP1, SLY1, NAB2	346	40	5872	2.12139	1	0.994503	96.9699
UP_SEQ_FEATURE	repeat:4	3	0.867052	0.373807	P19659, P22213, P32505	GAL11, SLY1, NAB2	346	22	5872	2.31424	1	0.999861	99.9164
Annotation Cluster 24	Enrichment Score: 0.7399874998483148
Category	Term	Count	%	PValue	Genes/Uniprot	Gene Names	List Total	Pop Hits	Pop Total	Fold Enrichment	Bonferroni	Benjamini	FDR
KEGG_PATHWAY	sce00100:Steroid biosynthesis	5	1.44509	0.0145249	Q12452, P32352, P32353, P53629, P34163	ERG27, ERG2, ERG3, ARE2, TGL1	129	17	2194	5.00228	0.624804	0.13068	13.9348
GOTERM_BP_DIRECT	GO:0006696~ergosterol biosynthetic process	5	1.44509	0.047366	Q12452, P32352, P32353, P40030, P36060	ERG27, ERG2, ERG3, ERG28, MCR1	324	24	5557	3.57317	1	0.718699	52.2683
UP_KEYWORDS	Steroid biosynthesis	4	1.15607	0.161671	Q12452, P32352, P32353, P40030	ERG27, ERG2, ERG3, ERG28	346	24	5914	2.84875	1	0.587667	89.2436
GOTERM_BP_DIRECT	GO:0006694~steroid biosynthetic process	4	1.15607	0.174939	Q12452, P32352, P32353, P40030	ERG27, ERG2, ERG3, ERG28	324	25	5557	2.7442	1	0.939379	94.6649
GOTERM_BP_DIRECT	GO:0016126~sterol biosynthetic process	4	1.15607	0.204994	P53898, P32352, P32353, P40030	NSG2, ERG2, ERG3, ERG28	324	27	5557	2.54092	1	0.960052	96.9695
UP_KEYWORDS	Steroid metabolism	3	0.867052	0.370423	P32352, P32353, P40030	ERG2, ERG3, ERG28	346	22	5914	2.33079	1	0.808863	99.7121
UP_KEYWORDS	Sterol metabolism	3	0.867052	0.370423	P32352, P32353, P40030	ERG2, ERG3, ERG28	346	22	5914	2.33079	1	0.808863	99.7121
UP_KEYWORDS	Sterol biosynthesis	3	0.867052	0.370423	P32352, P32353, P40030	ERG2, ERG3, ERG28	346	22	5914	2.33079	1	0.808863	99.7121
GOTERM_BP_DIRECT	GO:0008202~steroid metabolic process	3	0.867052	0.389902	P32352, P32353, P40030	ERG2, ERG3, ERG28	324	23	5557	2.23712	1	0.99561	99.9464
UP_KEYWORDS	Lipid biosynthesis	6	1.7341	0.503773	Q12452, P32352, P32353, P36148, P40030, Q99190	ERG27, ERG2, ERG3, GPT2, ERG28, TSC13	346	80	5914	1.28194	1	0.882673	99.9858
Annotation Cluster 25	Enrichment Score: 0.7050735535814128
Category	Term	Count	%	PValue	Genes/Uniprot	Gene Names	List Total	Pop Hits	Pop Total	Fold Enrichment	Bonferroni	Benjamini	FDR
UP_KEYWORDS	Prenylation	6	1.7341	0.0244793	P01120, Q99260, P53879, P25349, P32939, P13856	RAS2, YPT6, RHO5, YCP4, YPT7, RSR1	346	29	5914	3.53638	0.994643	0.17608	26.9015
UP_SEQ_FEATURE	short sequence motif:Effector region	4	1.15607	0.0636959	P01120, Q99260, P32939, P13856	RAS2, YPT6, YPT7, RSR1	346	16	5872	4.24277	1	0.928371	63.0815
UP_SEQ_FEATURE	lipid moiety-binding region:S-geranylgeranyl cysteine	4	1.15607	0.0636959	Q99260, P53879, P32939, P13856	YPT6, RHO5, YPT7, RSR1	346	16	5872	4.24277	1	0.928371	63.0815
INTERPRO	IPR001806:Small GTPase superfamily	5	1.44509	0.0842012	P01120, Q99260, P53879, P32939, P13856	RAS2, YPT6, RHO5, YPT7, RSR1	329	26	5053	2.95359	1	0.974501	72.5904
UP_KEYWORDS	Methylation	8	2.31214	0.093875	P01120, Q99260, P61830, P53879, P25349, P32939, P13856, P04912	RAS2, YPT6, HHT1, RHO5, YCP4, YPT7, RSR1, HTA2	346	67	5914	2.04089	1	0.438856	71.2462
GOTERM_BP_DIRECT	GO:0007264~small GTPase mediated signal transduction	6	1.7341	0.153437	P01120, Q99260, P53879, P32939, P19146, P13856	RAS2, YPT6, RHO5, YPT7, ARF2, RSR1	324	49	5557	2.10015	1	0.931874	92.1035
INTERPRO	IPR005225:Small GTP-binding protein domain	6	1.7341	0.154049	P01120, Q99260, P53879, P32939, P19146, P13856	RAS2, YPT6, RHO5, YPT7, ARF2, RSR1	329	44	5053	2.09436	1	0.992441	91.4707
UP_KEYWORDS	GTP-binding	9	2.60116	0.196085	P01120, P53598, Q99260, P53879, Q01159, P32458, P32939, P19146, P13856	RAS2, LSC1, YPT6, RHO5, CEG1, CDC11, YPT7, ARF2, RSR1	346	96	5914	1.60242	1	0.648893	93.6687
GOTERM_MF_DIRECT	GO:0005525~GTP binding	9	2.60116	0.242578	P01120, P53598, Q99260, P53879, Q01159, P32458, P32939, P19146, P13856	RAS2, LSC1, YPT6, RHO5, CEG1, CDC11, YPT7, ARF2, RSR1	283	103	4885	1.50829	1	0.975751	97.9677
UP_KEYWORDS	Lipoprotein	11	3.17919	0.262102	P01120, P25296, Q99260, P46992, P36149, P53879, P25349, P32939, P19146, P13856, P39010	RAS2, CNB1, YPT6, YJL171C, BET3, RHO5, YCP4, YPT7, ARF2, RSR1, AKR1	346	135	5914	1.39272	1	0.695064	97.8572
UP_SEQ_FEATURE	nucleotide phosphate-binding region:GTP	7	2.02312	0.414907	P01120, Q99260, P53879, P32458, P32939, P19146, P13856	RAS2, YPT6, RHO5, CDC11, YPT7, ARF2, RSR1	346	88	5872	1.34997	1	0.999936	99.9701
GOTERM_MF_DIRECT	GO:0003924~GTPase activity	6	1.7341	0.494507	P01120, Q99260, P53879, P32939, P19146, P13856	RAS2, YPT6, RHO5, YPT7, ARF2, RSR1	283	80	4885	1.29461	1	0.996905	99.993
UP_SEQ_FEATURE	propeptide:Removed in mature form	5	1.44509	0.709565	P01120, P53879, P25349, P30656, P13856	RAS2, RHO5, YCP4, PRE2, RSR1	346	81	5872	1.0476	1	1	100
GOTERM_BP_DIRECT	GO:0016236~macroautophagy	3	0.867052	0.859362	P01120, P32939, P19146	RAS2, YPT7, ARF2	324	58	5557	0.887133	1	1	100
INTERPRO	IPR027417:P-loop containing nucleoside triphosphate hydrolase	17	4.91329	0.916979	P01120, P32639, Q03834, P53879, P31539, P13856, P39109, P36006, P00830, Q99260, P42938, P32458, P33416, P32939, P19146, P07251, P40433	RAS2, BRR2, MSH6, RHO5, HSP104, RSR1, YCF1, MYO3, ATP2, YPT6, TDA10, CDC11, HSP78, YPT7, ARF2, ATP1, PFK26	329	329	5053	0.793609	1	1	100
Annotation Cluster 26	Enrichment Score: 0.6983377555542335
Category	Term	Count	%	PValue	Genes/Uniprot	Gene Names	List Total	Pop Hits	Pop Total	Fold Enrichment	Bonferroni	Benjamini	FDR
GOTERM_MF_DIRECT	GO:0000149~SNARE binding	5	1.44509	0.0746936	Q01590, P38736, P22213, P39926, P38932	SED5, GOS1, SLY1, SSO2, VPS45	283	28	4885	3.08241	1	0.833008	66.331
GOTERM_CC_DIRECT	GO:0031201~SNARE complex	5	1.44509	0.0778212	Q01590, P38736, P22213, P39926, P38932	SED5, GOS1, SLY1, SSO2, VPS45	344	28	5861	3.04246	1	0.464922	65.0229
KEGG_PATHWAY	sce04130:SNARE interactions in vesicular transport	3	0.867052	0.349124	Q01590, P38736, P39926	SED5, GOS1, SSO2	129	21	2194	2.42968	1	0.780044	98.7777
GOTERM_BP_DIRECT	GO:0006906~vesicle fusion	3	0.867052	0.389902	Q01590, P38736, P39926	SED5, GOS1, SSO2	324	23	5557	2.23712	1	0.99561	99.9464
GOTERM_MF_DIRECT	GO:0005484~SNAP receptor activity	3	0.867052	0.407376	Q01590, P38736, P39926	SED5, GOS1, SSO2	283	24	4885	2.15769	1	0.994987	99.9349
Annotation Cluster 27	Enrichment Score: 0.5827338632176903
Category	Term	Count	%	PValue	Genes/Uniprot	Gene Names	List Total	Pop Hits	Pop Total	Fold Enrichment	Bonferroni	Benjamini	FDR
INTERPRO	IPR005024:Snf7	3	0.867052	0.0709911	P69771, P39929, P36095	DID2, SNF7, VPS24	329	7	5053	6.58228	1	0.972226	66.1604
GOTERM_CC_DIRECT	GO:0010008~endosome membrane	7	2.02312	0.161241	P69771, P39929, Q08299, P40527, P41318, P36095, Q92331	DID2, SNF7, ENB1, NEO1, LST8, VPS24, VPS5	344	63	5861	1.89309	1	0.671626	89.7704
GOTERM_BP_DIRECT	GO:0045324~late endosome to vacuole transport	3	0.867052	0.303663	P69771, P39929, P36095	DID2, SNF7, VPS24	324	19	5557	2.70809	1	0.98531	99.5979
UP_KEYWORDS	Endosome	7	2.02312	0.408227	P69771, P39929, Q08299, P40527, P36095, Q92331, P39010	DID2, SNF7, ENB1, NEO1, VPS24, VPS5, AKR1	346	88	5914	1.35963	1	0.837115	99.8684
GOTERM_BP_DIRECT	GO:0007034~vacuolar transport	3	0.867052	0.431271	P69771, P39929, P36095	DID2, SNF7, VPS24	324	25	5557	2.05815	1	0.997149	99.9816
GOTERM_CC_DIRECT	GO:0005768~endosome	9	2.60116	0.521045	P40509, P69771, P39929, Q08299, P32913, P40527, P36095, Q92331, P39010	SEC28, DID2, SNF7, ENB1, VPS17, NEO1, VPS24, VPS5, AKR1	344	133	5861	1.15293	1	0.963337	99.9928
Annotation Cluster 28	Enrichment Score: 0.5381449563080606
Category	Term	Count	%	PValue	Genes/Uniprot	Gene Names	List Total	Pop Hits	Pop Total	Fold Enrichment	Bonferroni	Benjamini	FDR
GOTERM_BP_DIRECT	GO:0006337~nucleosome disassembly	4	1.15607	0.106688	P18480, Q03124, P32447, Q06639	SNF5, RSC9, ASF1, RSC3	324	20	5557	3.43025	1	0.882101	82.0847
GOTERM_CC_DIRECT	GO:0016586~RSC complex	3	0.867052	0.306521	P18480, Q03124, Q06639	SNF5, RSC9, RSC3	344	19	5861	2.69018	1	0.871879	99.1314
GOTERM_BP_DIRECT	GO:0043044~ATP-dependent chromatin remodeling	3	0.867052	0.410764	P18480, Q03124, Q06639	SNF5, RSC9, RSC3	324	24	5557	2.1439	1	0.996745	99.9685
GOTERM_MF_DIRECT	GO:0015616~DNA translocase activity	3	0.867052	0.523904	P18480, Q03124, Q06639	SNF5, RSC9, RSC3	283	30	4885	1.72615	1	0.997616	99.997
Annotation Cluster 29	Enrichment Score: 0.43895551000551986
Category	Term	Count	%	PValue	Genes/Uniprot	Gene Names	List Total	Pop Hits	Pop Total	Fold Enrichment	Bonferroni	Benjamini	FDR
GOTERM_CC_DIRECT	GO:0009986~cell surface	4	1.15607	0.108371	P23776, P38081, P46992, P15703	EXG1, YBR056W, YJL171C, BGL2	344	20	5861	3.40756	1	0.554917	77.4019
COG_ONTOLOGY	Carbohydrate transport and metabolism	5	1.44509	0.121683	P23776, P32356, P43123, P38081, P19881	EXG1, NTH1, QRI1, YBR056W, PHO13	60	32	977	2.54427	0.965729	0.965729	65.4938
KEGG_PATHWAY	sce00500:Starch and sucrose metabolism	4	1.15607	0.416164	P38426, P23776, P32356, P15703	TPS3, EXG1, NTH1, BGL2	129	40	2194	1.70078	1	0.8058	99.5991
INTERPRO	IPR013781:Glycoside hydrolase, catalytic domain	3	0.867052	0.489554	P23776, P38081, P15703	EXG1, YBR056W, BGL2	329	25	5053	1.84304	1	1	99.995
UP_KEYWORDS	Glycosidase	4	1.15607	0.493105	P23776, P32356, P38081, P15703	EXG1, NTH1, YBR056W, BGL2	346	45	5914	1.51933	1	0.878555	99.9814
GOTERM_MF_DIRECT	GO:0016798~hydrolase activity, acting on glycosyl bonds	4	1.15607	0.500958	P23776, P32356, P38081, P15703	EXG1, NTH1, YBR056W, BGL2	283	46	4885	1.501	1	0.996877	99.9942
INTERPRO	IPR017853:Glycoside hydrolase, superfamily	3	0.867052	0.510654	P23776, P38081, P15703	EXG1, YBR056W, BGL2	329	26	5053	1.77215	1	1	99.9973
GOTERM_CC_DIRECT	GO:0009277~fungal-type cell wall	5	1.44509	0.908403	P23776, P38081, P46992, P32478, P15703	EXG1, YBR056W, YJL171C, HSP150, BGL2	344	114	5861	0.747272	1	0.999783	100
Annotation Cluster 30	Enrichment Score: 0.43307298780498577
Category	Term	Count	%	PValue	Genes/Uniprot	Gene Names	List Total	Pop Hits	Pop Total	Fold Enrichment	Bonferroni	Benjamini	FDR
UP_KEYWORDS	Vacuole	14	4.04624	0.238457	Q12078, Q12296, Q08921, P14904, P07267, P38836, P38310, P38929, P41318, P32939, P42839, Q12200, P38932, P39109	SMF3, MAM3, TCO89, LAP4, PEP4, ECM14, FTH1, PMC1, LST8, YPT7, VNX1, NCR1, VPS45, YCF1	346	178	5914	1.34435	1	0.668906	96.8072
GOTERM_CC_DIRECT	GO:0005774~vacuolar membrane	12	3.46821	0.364349	Q12078, Q12296, Q08921, Q08299, P38310, P38929, P41318, P32335, P42839, Q12200, P38932, P39109	SMF3, MAM3, TCO89, ENB1, FTH1, PMC1, LST8, MSS51, VNX1, NCR1, VPS45, YCF1	344	164	5861	1.24667	1	0.916844	99.7191
GOTERM_CC_DIRECT	GO:0005773~vacuole	14	4.04624	0.444578	Q12078, Q12296, Q08921, P14904, P07267, P38836, P38310, P38929, P41318, P32939, P42839, Q12200, P38932, P39109	SMF3, MAM3, TCO89, LAP4, PEP4, ECM14, FTH1, PMC1, LST8, YPT7, VNX1, NCR1, VPS45, YCF1	344	208	5861	1.14677	1	0.948395	99.9512
GOTERM_CC_DIRECT	GO:0000329~fungal-type vacuole membrane	14	4.04624	0.479549	Q12078, Q12296, Q08921, P20107, P47008, Q03516, P38310, Q12284, P38929, P53879, P32939, P42839, Q12200, P39109	SMF3, MAM3, TCO89, ZRC1, SFH5, RSN1, FTH1, ERV2, PMC1, RHO5, YPT7, VNX1, NCR1, YCF1	344	213	5861	1.11985	1	0.952332	99.979
Annotation Cluster 31	Enrichment Score: 0.3245918243046585
Category	Term	Count	%	PValue	Genes/Uniprot	Gene Names	List Total	Pop Hits	Pop Total	Fold Enrichment	Bonferroni	Benjamini	FDR
GOTERM_CC_DIRECT	GO:0009986~cell surface	4	1.15607	0.108371	P23776, P38081, P46992, P15703	EXG1, YBR056W, YJL171C, BGL2	344	20	5861	3.40756	1	0.554917	77.4019
GOTERM_CC_DIRECT	GO:0005576~extracellular region	10	2.89017	0.193607	P23776, P14904, P38081, P32454, Q12335, P46992, P32478, P15703, P38616, P31787	EXG1, LAP4, YBR056W, APE2, PST2, YJL171C, HSP150, BGL2, YGP1, ACB1	344	110	5861	1.54889	1	0.735196	93.8588
UP_KEYWORDS	Cell wall biogenesis/degradation	7	2.02312	0.460934	P22023, P23776, P36156, P38836, P32478, P50111, P15703	KRE5, EXG1, ECM4, ECM14, HSP150, ZDS1, BGL2	346	93	5914	1.28653	1	0.861303	99.9595
GOTERM_BP_DIRECT	GO:0071555~cell wall organization	7	2.02312	0.467843	P22023, P23776, P36156, P38836, P32478, P50111, P15703	KRE5, EXG1, ECM4, ECM14, HSP150, ZDS1, BGL2	324	94	5557	1.27722	1	0.998297	99.9933
UP_KEYWORDS	Secreted	5	1.44509	0.747806	P23776, Q12335, P32478, P15703, P38616	EXG1, PST2, HSP150, BGL2, YGP1	346	86	5914	0.993749	1	0.967274	100
UP_KEYWORDS	Cell wall	3	0.867052	0.900227	P23776, P32478, P15703	EXG1, HSP150, BGL2	346	65	5914	0.788884	1	0.994643	100
GOTERM_CC_DIRECT	GO:0009277~fungal-type cell wall	5	1.44509	0.908403	P23776, P38081, P46992, P32478, P15703	EXG1, YBR056W, YJL171C, HSP150, BGL2	344	114	5861	0.747272	1	0.999783	100
GOTERM_CC_DIRECT	GO:0005618~cell wall	3	0.867052	0.914682	P23776, P32478, P15703	EXG1, HSP150, BGL2	344	68	5861	0.751667	1	0.999785	100
Annotation Cluster 32	Enrichment Score: 0.3203965009719983
Category	Term	Count	%	PValue	Genes/Uniprot	Gene Names	List Total	Pop Hits	Pop Total	Fold Enrichment	Bonferroni	Benjamini	FDR
UP_SEQ_FEATURE	active site:Proton acceptor	17	4.91329	0.112221	Q12452, P17505, P40580, P38080, P47116, P07275, P41911, P13186, Q00055, P38067, Q12100, P06244, P40471, P00546, P36086, P06245, P38692	ERG27, MDH1, IRC24, AKL1, PTK2, PUT2, GPD2, KIN2, GPD1, UGA2, RTK1, TPK1, AYR1, CDC28, YKL071W, TPK2, KIC1	346	196	5872	1.47198	1	0.976041	83.506
GOTERM_BP_DIRECT	GO:0016310~phosphorylation	17	4.91329	0.16932	P27697, Q07688, P54838, P38080, P47116, Q03778, P21373, Q06892, P52489, P13186, Q12100, P42938, P06244, P00546, P06245, P40433, P38692	COQ8, YPD1, DAK1, AKL1, PTK2, FMN1, UTR1, POS5, PYK2, KIN2, RTK1, TDA10, TPK1, CDC28, TPK2, PFK26, KIC1	324	212	5557	1.37533	1	0.943286	94.0834
GOTERM_MF_DIRECT	GO:0016301~kinase activity	16	4.62428	0.213686	P27697, P54838, P38080, P47116, Q03778, P21373, Q06892, P52489, P13186, Q12100, P42938, P06244, P00546, P06245, P40433, P38692	COQ8, DAK1, AKL1, PTK2, FMN1, UTR1, POS5, PYK2, KIN2, RTK1, TDA10, TPK1, CDC28, TPK2, PFK26, KIC1	283	207	4885	1.33422	1	0.967941	96.5647
UP_KEYWORDS	Kinase	16	4.62428	0.215264	P27697, P54838, P38080, P47116, Q03778, P21373, Q06892, P52489, P13186, Q12100, P42938, P06244, P00546, P06245, P40433, P38692	COQ8, DAK1, AKL1, PTK2, FMN1, UTR1, POS5, PYK2, KIN2, RTK1, TDA10, TPK1, CDC28, TPK2, PFK26, KIC1	346	205	5914	1.33405	1	0.663197	95.3344
GOTERM_MF_DIRECT	GO:0004672~protein kinase activity	9	2.60116	0.452526	P38080, P47116, P27697, P13186, Q12100, P06244, P00546, P06245, P38692	AKL1, PTK2, COQ8, KIN2, RTK1, TPK1, CDC28, TPK2, KIC1	283	127	4885	1.22325	1	0.996594	99.9786
GOTERM_MF_DIRECT	GO:0000166~nucleotide binding	50	14.4509	0.470633	P53598, P53879, P31539, P39109, P38080, P36006, P00830, Q99260, P13186, Q12100, P42938, P33416, P40433, P32639, Q03834, P30624, P32477, Q12676, P13856, P36036, Q03778, P21373, P32381, P38692, P32843, P28273, P54838, Q06892, Q01159, P00546, P06244, P19146, P06245, P52490, P01120, P27697, P53312, P40527, P53316, P47116, P36016, Q08925, P16474, P11154, P52489, P40561, P38929, P32458, P32939, P07251	LSC1, RHO5, HSP104, YCF1, AKL1, MYO3, ATP2, YPT6, KIN2, RTK1, TDA10, HSP78, PFK26, BRR2, MSH6, FAA1, GSH1, FOL3, RSR1, YRA2, FMN1, UTR1, ARP2, KIC1, YME2, OXP1, DAK1, POS5, CEG1, CDC28, TPK1, ARF2, TPK2, UBC13, RAS2, COQ8, LSC2, NEO1, YGR250C, PTK2, LHS1, MRN1, KAR2, PYC1, PYK2, SGN1, PMC1, CDC11, YPT7, ATP1	283	834	4885	1.03486	1	0.996362	99.9866
INTERPRO	IPR017441:Protein kinase, ATP binding site	7	2.02312	0.500703	P47116, P13186, Q12100, P06244, P00546, P06245, P38692	PTK2, KIN2, RTK1, TPK1, CDC28, TPK2, KIC1	329	87	5053	1.23575	1	1	99.9964
INTERPRO	IPR011009:Protein kinase-like domain	10	2.89017	0.508347	P38080, P47116, P27697, P40053, P13186, Q12100, P06244, P00546, P06245, P38692	AKL1, PTK2, COQ8, AIM9, KIN2, RTK1, TPK1, CDC28, TPK2, KIC1	329	134	5053	1.14617	1	1	99.9971
UP_KEYWORDS	Nucleotide-binding	45	13.0058	0.547989	P53598, P53879, P54838, P28273, P31539, P39109, P38080, P36006, Q99260, P00830, Q06892, P13186, Q01159, P42938, Q12100, P00546, P33416, P06244, P19146, P06245, P40433, P52490, P01120, P27697, P53312, P32639, Q03834, P30624, P40527, P32477, Q12676, P13856, Q03778, P47116, P36016, P16474, P21373, P11154, P52489, P38929, P32458, P32939, P32381, P07251, P38692	LSC1, RHO5, DAK1, OXP1, HSP104, YCF1, AKL1, MYO3, YPT6, ATP2, POS5, KIN2, CEG1, TDA10, RTK1, CDC28, HSP78, TPK1, ARF2, TPK2, PFK26, UBC13, RAS2, COQ8, LSC2, BRR2, MSH6, FAA1, NEO1, GSH1, FOL3, RSR1, FMN1, PTK2, LHS1, KAR2, UTR1, PYC1, PYK2, PMC1, CDC11, YPT7, ARP2, ATP1, KIC1	346	760	5914	1.01206	1	0.892893	99.9956
UP_SEQ_FEATURE	domain:Protein kinase	8	2.31214	0.555011	P38080, P47116, P13186, Q12100, P06244, P00546, P06245, P38692	AKL1, PTK2, KIN2, RTK1, TPK1, CDC28, TPK2, KIC1	346	119	5872	1.14091	1	0.999999	99.9995
GOTERM_MF_DIRECT	GO:0004674~protein serine/threonine kinase activity	8	2.31214	0.563156	P38080, P47116, P13186, Q12100, P06244, P00546, P06245, P38692	AKL1, PTK2, KIN2, RTK1, TPK1, CDC28, TPK2, KIC1	283	122	4885	1.1319	1	0.998474	99.9991
UP_KEYWORDS	Serine/threonine-protein kinase	8	2.31214	0.574176	P38080, P47116, P13186, Q12100, P06244, P00546, P06245, P38692	AKL1, PTK2, KIN2, RTK1, TPK1, CDC28, TPK2, KIC1	346	122	5914	1.12082	1	0.903618	99.9979
INTERPRO	IPR008271:Serine/threonine-protein kinase, active site	8	2.31214	0.588156	P38080, P47116, P13186, Q12100, P06244, P00546, P06245, P38692	AKL1, PTK2, KIN2, RTK1, TPK1, CDC28, TPK2, KIC1	329	111	5053	1.10693	1	1	99.9998
SMART	SM00220:S_TKc	8	2.31214	0.627511	P38080, P47116, P13186, Q12100, P06244, P00546, P06245, P38692	AKL1, PTK2, KIN2, RTK1, TPK1, CDC28, TPK2, KIC1	118	113	1776	1.06555	1	1	99.9978
INTERPRO	IPR000719:Protein kinase, catalytic domain	8	2.31214	0.644354	P38080, P47116, P13186, Q12100, P06244, P00546, P06245, P38692	AKL1, PTK2, KIN2, RTK1, TPK1, CDC28, TPK2, KIC1	329	117	5053	1.05016	1	1	100
UP_KEYWORDS	ATP-binding	37	10.6936	0.66361	P53598, P28273, P54838, P31539, P39109, P38080, P36006, P00830, Q06892, P13186, P42938, Q12100, P00546, P33416, P06244, P06245, P40433, P52490, P27697, P53312, P32639, Q03834, P30624, P40527, P32477, Q12676, P47116, Q03778, P36016, P16474, P21373, P11154, P52489, P38929, P32381, P07251, P38692	LSC1, OXP1, DAK1, HSP104, YCF1, AKL1, MYO3, ATP2, POS5, KIN2, TDA10, RTK1, CDC28, HSP78, TPK1, TPK2, PFK26, UBC13, COQ8, LSC2, BRR2, MSH6, FAA1, NEO1, GSH1, FOL3, PTK2, FMN1, LHS1, KAR2, UTR1, PYC1, PYK2, PMC1, ARP2, ATP1, KIC1	346	651	5914	0.971462	1	0.94146	99.9999
GOTERM_BP_DIRECT	GO:0006468~protein phosphorylation	8	2.31214	0.669837	P38080, P47116, P13186, Q12100, P06244, P00546, P06245, P38692	AKL1, PTK2, KIN2, RTK1, TPK1, CDC28, TPK2, KIC1	324	134	5557	1.02395	1	0.999892	100
GOTERM_MF_DIRECT	GO:0005524~ATP binding	37	10.6936	0.70301	P53598, P28273, P54838, P31539, P39109, P38080, P36006, P00830, Q06892, P13186, P42938, Q12100, P00546, P33416, P06244, P06245, P40433, P52490, P27697, P53312, P32639, Q03834, P30624, P40527, P32477, Q12676, P47116, Q03778, P36016, P16474, P21373, P11154, P52489, P38929, P32381, P07251, P38692	LSC1, OXP1, DAK1, HSP104, YCF1, AKL1, MYO3, ATP2, POS5, KIN2, TDA10, RTK1, CDC28, HSP78, TPK1, TPK2, PFK26, UBC13, COQ8, LSC2, BRR2, MSH6, FAA1, NEO1, GSH1, FOL3, PTK2, FMN1, LHS1, KAR2, UTR1, PYC1, PYK2, PMC1, ARP2, ATP1, KIC1	283	668	4885	0.9561	1	0.999831	100
UP_SEQ_FEATURE	binding site:ATP	9	2.60116	0.725714	P38080, P47116, P11154, P13186, Q12100, P06244, P00546, P06245, P38692	AKL1, PTK2, PYC1, KIN2, RTK1, TPK1, CDC28, TPK2, KIC1	346	159	5872	0.960628	1	1	100
GOTERM_BP_DIRECT	GO:0035556~intracellular signal transduction	3	0.867052	0.777632	P47116, P13186, Q12100	PTK2, KIN2, RTK1	324	48	5557	1.07195	1	0.999991	100
UP_SEQ_FEATURE	nucleotide phosphate-binding region:ATP	17	4.91329	0.956563	P32639, Q03834, Q12676, P38080, P47116, P36006, P00830, P13186, Q12100, P42938, P06244, P32381, P00546, P07251, P06245, P40433, P38692	BRR2, MSH6, FOL3, AKL1, PTK2, MYO3, ATP2, KIN2, RTK1, TDA10, TPK1, ARP2, CDC28, ATP1, TPK2, PFK26, KIC1	346	390	5872	0.739766	1	1	100
Annotation Cluster 33	Enrichment Score: 0.30621145263165966
Category	Term	Count	%	PValue	Genes/Uniprot	Gene Names	List Total	Pop Hits	Pop Total	Fold Enrichment	Bonferroni	Benjamini	FDR
UP_KEYWORDS	Peroxisome	5	1.44509	0.414289	P40581, Q12462, Q00055, P38137, Q06169	HYR1, PEX11, GPD1, PCS60, PEX30	346	56	5914	1.52611	1	0.833305	99.8845
GOTERM_CC_DIRECT	GO:0005777~peroxisome	6	1.7341	0.472541	Q02647, P40581, Q12462, Q00055, P38137, Q06169	DYN2, HYR1, PEX11, GPD1, PCS60, PEX30	344	77	5861	1.32762	1	0.954864	99.975
GOTERM_CC_DIRECT	GO:0005778~peroxisomal membrane	3	0.867052	0.616059	Q12462, P38137, Q06169	PEX11, PCS60, PEX30	344	35	5861	1.46038	1	0.983035	99.9996
Annotation Cluster 34	Enrichment Score: 0.2909814870465812
Category	Term	Count	%	PValue	Genes/Uniprot	Gene Names	List Total	Pop Hits	Pop Total	Fold Enrichment	Bonferroni	Benjamini	FDR
UP_SEQ_FEATURE	nucleotide phosphate-binding region:ATP 2	3	0.867052	0.285948	P31539, P33416, P39109	HSP104, HSP78, YCF1	346	18	5872	2.82852	1	0.998824	99.3899
UP_SEQ_FEATURE	nucleotide phosphate-binding region:ATP 1	3	0.867052	0.285948	P31539, P33416, P39109	HSP104, HSP78, YCF1	346	18	5872	2.82852	1	0.998824	99.3899
INTERPRO	IPR003593:AAA+ ATPase domain	4	1.15607	0.913576	P00830, P31539, P33416, P39109	ATP2, HSP104, HSP78, YCF1	329	83	5053	0.740177	1	1	100
SMART	SM00382:AAA	4	1.15607	0.917814	P00830, P31539, P33416, P39109	ATP2, HSP104, HSP78, YCF1	118	82	1776	0.734188	1	1	100
Annotation Cluster 35	Enrichment Score: 0.2252682841516985
Category	Term	Count	%	PValue	Genes/Uniprot	Gene Names	List Total	Pop Hits	Pop Total	Fold Enrichment	Bonferroni	Benjamini	FDR
UP_KEYWORDS	Iron transport	3	0.867052	0.453268	Q12078, Q08299, P38310	SMF3, ENB1, FTH1	346	26	5914	1.97221	1	0.859144	99.9516
GOTERM_BP_DIRECT	GO:0055072~iron ion homeostasis	3	0.867052	0.509221	Q12078, Q08299, P38310	SMF3, ENB1, FTH1	324	29	5557	1.77427	1	0.998918	99.9981
UP_KEYWORDS	Iron	5	1.44509	0.913974	Q12078, Q08299, P23180, P32353, P38310	SMF3, ENB1, AIM17, ERG3, FTH1	346	116	5914	0.736745	1	0.995939	100
Annotation Cluster 36	Enrichment Score: 0.22212298744811207
Category	Term	Count	%	PValue	Genes/Uniprot	Gene Names	List Total	Pop Hits	Pop Total	Fold Enrichment	Bonferroni	Benjamini	FDR
GOTERM_MF_DIRECT	GO:0030170~pyridoxal phosphate binding	4	1.15607	0.47106	P36007, P47039, P37291, P06106	SRY1, BNA3, SHM2, MET17	283	44	4885	1.56923	1	0.995939	99.9868
INTERPRO	IPR015422:Pyridoxal phosphate-dependent transferase, major region, subdomain 2	3	0.867052	0.57043	P47039, P37291, P06106	BNA3, SHM2, MET17	329	29	5053	1.58883	1	1	99.9996
INTERPRO	IPR015424:Pyridoxal phosphate-dependent transferase	3	0.867052	0.657918	P47039, P37291, P06106	BNA3, SHM2, MET17	329	34	5053	1.35518	1	1	100
INTERPRO	IPR015421:Pyridoxal phosphate-dependent transferase, major region, subdomain 1	3	0.867052	0.657918	P47039, P37291, P06106	BNA3, SHM2, MET17	329	34	5053	1.35518	1	1	100
UP_KEYWORDS	Pyridoxal phosphate	4	1.15607	0.666443	P36007, P47039, P37291, P06106	SRY1, BNA3, SHM2, MET17	346	58	5914	1.17879	1	0.940703	99.9999
Annotation Cluster 37	Enrichment Score: 0.18112508602268146
Category	Term	Count	%	PValue	Genes/Uniprot	Gene Names	List Total	Pop Hits	Pop Total	Fold Enrichment	Bonferroni	Benjamini	FDR
GOTERM_BP_DIRECT	GO:0000122~negative regulation of transcription from RNA polymerase II promoter	10	2.89017	0.149224	P19659, P17106, P53064, P27705, P32561, P38904, P22696, P33417, P02293, P40096	GAL11, CBF1, RTF1, MIG1, RPD3, SPP41, ESS1, IXR1, HTB1, BUR6	324	104	5557	1.64916	1	0.934268	91.4828
GOTERM_BP_DIRECT	GO:0006368~transcription elongation from RNA polymerase II promoter	5	1.44509	0.384787	P53064, Q12432, P32561, Q03124, Q06639	RTF1, EAF3, RPD3, RSC9, RSC3	324	54	5557	1.58808	1	0.995551	99.9391
GOTERM_BP_DIRECT	GO:0016569~covalent chromatin modification	7	2.02312	0.558423	Q06337, Q12692, Q12432, P32561, Q03124, P32447, Q06639	EAF1, HTZ1, EAF3, RPD3, RSC9, ASF1, RSC3	324	103	5557	1.16562	1	0.999477	99.9996
UP_KEYWORDS	Chromatin regulator	7	2.02312	0.561965	Q06337, Q12692, Q12432, P32561, Q03124, P32447, Q06639	EAF1, HTZ1, EAF3, RPD3, RSC9, ASF1, RSC3	346	103	5914	1.16163	1	0.898908	99.9971
GOTERM_BP_DIRECT	GO:0045944~positive regulation of transcription from RNA polymerase II promoter	12	3.46821	0.627675	P19659, P18480, P17106, P21657, Q01159, P27705, P32561, P00546, P38616, Q06639, P22696, P40096	GAL11, SNF5, CBF1, DAL81, CEG1, MIG1, RPD3, CDC28, YGP1, RSC3, ESS1, BUR6	324	201	5557	1.02395	1	0.999799	100
UP_KEYWORDS	Activator	8	2.31214	0.924555	Q06337, P19659, P18480, Q12692, P53064, P21657, P33417, P40096	EAF1, GAL11, SNF5, HTZ1, RTF1, DAL81, IXR1, BUR6	346	186	5914	0.735161	1	0.996785	100
GOTERM_MF_DIRECT	GO:0003677~DNA binding	20	5.78035	0.982504	P11633, P61830, P21657, Q03834, Q03124, P36036, P04912, P02293, Q06337, P32445, Q12692, P17106, P53064, P20436, P32787, P11154, P27705, Q02486, Q06639, P33417	NHP6B, HHT1, DAL81, MSH6, RSC9, YRA2, HTA2, HTB1, EAF1, RIM1, HTZ1, CBF1, RTF1, RPB8, MGM101, PYC1, MIG1, ABF2, RSC3, IXR1	283	492	4885	0.701686	1	1	100
UP_KEYWORDS	Transcription regulation	17	4.91329	0.99635	P18480, P11633, P21657, P42935, P32561, Q03124, Q06337, P19659, Q12692, P17106, P53064, Q12432, P27705, P32447, Q06639, P40096, P33417	SNF5, NHP6B, DAL81, ELP2, RPD3, RSC9, EAF1, GAL11, HTZ1, CBF1, RTF1, EAF3, MIG1, ASF1, RSC3, BUR6, IXR1	346	477	5914	0.609166	1	0.999984	100
GOTERM_BP_DIRECT	GO:0006351~transcription, DNA-templated	19	5.49133	0.996891	P18480, P11633, P21657, P42935, P40040, Q03124, P32561, Q06337, P19659, Q12692, P17106, P53064, P20436, Q12432, P27705, P32447, Q06639, P40096, P33417	SNF5, NHP6B, DAL81, ELP2, THO1, RSC9, RPD3, EAF1, GAL11, HTZ1, CBF1, RTF1, RPB8, EAF3, MIG1, ASF1, RSC3, BUR6, IXR1	324	527	5557	0.618356	1	1	100
UP_KEYWORDS	Transcription	18	5.20231	0.998599	P18480, P11633, P21657, P42935, Q03124, P32561, Q06337, P19659, Q12692, P17106, P53064, P20436, Q12432, P27705, P32447, Q06639, P40096, P33417	SNF5, NHP6B, DAL81, ELP2, RSC9, RPD3, EAF1, GAL11, HTZ1, CBF1, RTF1, RPB8, EAF3, MIG1, ASF1, RSC3, BUR6, IXR1	346	528	5914	0.582698	1	0.999997	100
GOTERM_BP_DIRECT	GO:0006355~regulation of transcription, DNA-templated	17	4.91329	0.99871	P18480, P11633, P21657, P42935, P32561, Q03124, Q06337, P19659, Q12692, P17106, P53064, Q12432, P27705, P32447, Q06639, P40096, P33417	SNF5, NHP6B, DAL81, ELP2, RPD3, RSC9, EAF1, GAL11, HTZ1, CBF1, RTF1, EAF3, MIG1, ASF1, RSC3, BUR6, IXR1	324	509	5557	0.572831	1	1	100
Annotation Cluster 38	Enrichment Score: 0.17259430743297166
Category	Term	Count	%	PValue	Genes/Uniprot	Gene Names	List Total	Pop Hits	Pop Total	Fold Enrichment	Bonferroni	Benjamini	FDR
SMART	SM00360:RRM	5	1.44509	0.375075	P32843, Q08925, P40561, P36036, P53316	YME2, MRN1, SGN1, YRA2, YGR250C	118	47	1776	1.60115	1	0.999971	99.3924
INTERPRO	IPR000504:RNA recognition motif domain	5	1.44509	0.468668	P32843, Q08925, P40561, P36036, P53316	YME2, MRN1, SGN1, YRA2, YGR250C	329	54	5053	1.4221	1	1	99.9909
UP_SEQ_FEATURE	domain:RRM	3	0.867052	0.585838	P32843, P40561, P36036	YME2, SGN1, YRA2	346	33	5872	1.54283	1	1	99.9998
INTERPRO	IPR012677:Nucleotide-binding, alpha-beta plait	5	1.44509	0.604724	P32843, Q08925, P40561, P36036, P53316	YME2, MRN1, SGN1, YRA2, YGR250C	329	64	5053	1.1999	1	1	99.9999
UP_KEYWORDS	RNA-binding	11	3.17919	0.99628	P32843, Q08925, P28241, P40018, P25359, P28834, Q12034, P40561, P32505, P36036, P53316	YME2, MRN1, IDH2, SMB1, RRP43, IDH1, SLF1, SGN1, NAB2, YRA2, YGR250C	346	340	5914	0.552992	1	0.999985	100
GOTERM_MF_DIRECT	GO:0003676~nucleic acid binding	8	2.31214	0.99815	P32843, P32639, Q08925, P54964, P40561, P27705, P36036, P53316	YME2, BRR2, MRN1, REX2, SGN1, MIG1, YRA2, YGR250C	283	286	4885	0.482839	1	1	100
GOTERM_MF_DIRECT	GO:0003723~RNA binding	13	3.75723	0.999874	P32843, P28241, P40018, P25359, P40040, P32505, P36036, P53316, Q08925, P53064, P28834, P40561, Q12034	YME2, IDH2, SMB1, RRP43, THO1, NAB2, YRA2, YGR250C, MRN1, RTF1, IDH1, SGN1, SLF1	283	477	4885	0.470439	1	1	100
Annotation Cluster 39	Enrichment Score: 0.16304276494210898
Category	Term	Count	%	PValue	Genes/Uniprot	Gene Names	List Total	Pop Hits	Pop Total	Fold Enrichment	Bonferroni	Benjamini	FDR
GOTERM_CC_DIRECT	GO:0005816~spindle pole body	6	1.7341	0.437721	P06787, P32598, P31383, P06704, P41697, P00546	CMD1, GLC7, TPD3, CDC31, BUD6, CDC28	344	74	5861	1.38144	1	0.948323	99.9427
GOTERM_CC_DIRECT	GO:0005934~cellular bud tip	5	1.44509	0.845592	P06787, P31383, Q12402, P41697, P50111	CMD1, TPD3, YOP1, BUD6, ZDS1	344	100	5861	0.85189	1	0.999174	100
GOTERM_CC_DIRECT	GO:0005935~cellular bud neck	9	2.60116	0.876019	P06787, P32598, P38080, P31383, P41697, P50111, P32458, P00546, P13856	CMD1, GLC7, AKL1, TPD3, BUD6, ZDS1, CDC11, CDC28, RSR1	344	190	5861	0.807053	1	0.999491	100
Annotation Cluster 40	Enrichment Score: 0.16053898634646996
Category	Term	Count	%	PValue	Genes/Uniprot	Gene Names	List Total	Pop Hits	Pop Total	Fold Enrichment	Bonferroni	Benjamini	FDR
GOTERM_MF_DIRECT	GO:0043130~ubiquitin binding	5	1.44509	0.24743	P38428, P38328, P41811, Q08412, P36037	CUE1, ARC40, SEC27, CUE5, DOA1	283	44	4885	1.96153	1	0.974941	98.1428
INTERPRO	IPR020472:G-protein beta WD-40 repeat	3	0.867052	0.607253	P41811, P41318, P36037	SEC27, LST8, DOA1	329	31	5053	1.48632	1	1	99.9999
INTERPRO	IPR015943:WD40/YVTN repeat-like-containing domain	8	2.31214	0.687615	P42935, P40157, P11655, P38328, P41811, P41318, P53270, P36037	ELP2, VID27, SEC12, ARC40, SEC27, LST8, YGR117C, DOA1	329	122	5053	1.00713	1	1	100
UP_SEQ_FEATURE	repeat:WD 7	3	0.867052	0.690691	P42935, P41318, P36037	ELP2, LST8, DOA1	346	40	5872	1.27283	1	1	100
UP_SEQ_FEATURE	repeat:WD 5	5	1.44509	0.718647	P42935, P38328, P41811, P41318, P36037	ELP2, ARC40, SEC27, LST8, DOA1	346	82	5872	1.03482	1	1	100
INTERPRO	IPR001680:WD40 repeat	6	1.7341	0.748378	P42935, P11655, P38328, P41811, P41318, P36037	ELP2, SEC12, ARC40, SEC27, LST8, DOA1	329	95	5053	0.970021	1	1	100
UP_SEQ_FEATURE	repeat:WD 6	4	1.15607	0.753865	P42935, P41811, P41318, P36037	ELP2, SEC27, LST8, DOA1	346	66	5872	1.02855	1	1	100
UP_SEQ_FEATURE	repeat:WD 2	6	1.7341	0.7551	P42935, P11655, P38328, P41811, P41318, P36037	ELP2, SEC12, ARC40, SEC27, LST8, DOA1	346	106	5872	0.960628	1	1	100
UP_SEQ_FEATURE	repeat:WD 1	6	1.7341	0.7551	P42935, P11655, P38328, P41811, P41318, P36037	ELP2, SEC12, ARC40, SEC27, LST8, DOA1	346	106	5872	0.960628	1	1	100
SMART	SM00320:WD40	6	1.7341	0.756612	P42935, P11655, P38328, P41811, P41318, P36037	ELP2, SEC12, ARC40, SEC27, LST8, DOA1	118	94	1776	0.960692	1	1	100
UP_KEYWORDS	WD repeat	6	1.7341	0.763972	P42935, P11655, P38328, P41811, P41318, P36037	ELP2, SEC12, ARC40, SEC27, LST8, DOA1	346	108	5914	0.949583	1	0.971055	100
UP_SEQ_FEATURE	repeat:WD 4	5	1.44509	0.811625	P42935, P38328, P41811, P41318, P36037	ELP2, ARC40, SEC27, LST8, DOA1	346	94	5872	0.902718	1	1	100
UP_SEQ_FEATURE	repeat:WD 3	5	1.44509	0.847788	P42935, P38328, P41811, P41318, P36037	ELP2, ARC40, SEC27, LST8, DOA1	346	100	5872	0.848555	1	1	100
INTERPRO	IPR017986:WD40-repeat-containing domain	6	1.7341	0.861929	P42935, P38328, P41811, P41318, P53270, P36037	ELP2, ARC40, SEC27, LST8, YGR117C, DOA1	329	112	5053	0.822785	1	1	100
Annotation Cluster 41	Enrichment Score: 0.07770753505343543
Category	Term	Count	%	PValue	Genes/Uniprot	Gene Names	List Total	Pop Hits	Pop Total	Fold Enrichment	Bonferroni	Benjamini	FDR
GOTERM_BP_DIRECT	GO:0032259~methylation	5	1.44509	0.753491	P49017, P32643, P48015, Q04371, P49957	COQ5, TMT1, GCV1, YMR027W, TRM9	324	87	5557	0.985703	1	0.999984	100
UP_KEYWORDS	S-adenosyl-L-methionine	4	1.15607	0.85426	P49017, P32643, Q04371, P49957	COQ5, TMT1, YMR027W, TRM9	346	80	5914	0.854624	1	0.990126	100
UP_KEYWORDS	Methyltransferase	4	1.15607	0.870979	P49017, P32643, Q04371, P49957	COQ5, TMT1, YMR027W, TRM9	346	83	5914	0.823734	1	0.991778	100
GOTERM_MF_DIRECT	GO:0008168~methyltransferase activity	4	1.15607	0.871955	P49017, P32643, Q04371, P49957	COQ5, TMT1, YMR027W, TRM9	283	84	4885	0.821975	1	0.999999	100
Annotation Cluster 42	Enrichment Score: 0.02291095766059125
Category	Term	Count	%	PValue	Genes/Uniprot	Gene Names	List Total	Pop Hits	Pop Total	Fold Enrichment	Bonferroni	Benjamini	FDR
KEGG_PATHWAY	sce04113:Meiosis - yeast	6	1.7341	0.871948	P32598, P40957, P31383, P06244, P00546, P06245	GLC7, MAD1, TPD3, TPK1, CDC28, TPK2	129	126	2194	0.809893	1	0.992687	100
UP_KEYWORDS	Mitosis	5	1.44509	0.939681	P32598, P40957, P33309, P06704, P00546	GLC7, MAD1, DOM34, CDC31, CDC28	346	125	5914	0.683699	1	0.997913	100
UP_KEYWORDS	Cell division	8	2.31214	0.945772	P32598, P40957, P33309, P06704, P32458, P06244, P00546, P13856	GLC7, MAD1, DOM34, CDC31, CDC11, TPK1, CDC28, RSR1	346	196	5914	0.697652	1	0.998236	100
GOTERM_BP_DIRECT	GO:0051301~cell division	8	2.31214	0.946471	P32598, P40957, P33309, P06704, P32458, P06244, P00546, P13856	GLC7, MAD1, DOM34, CDC31, CDC11, TPK1, CDC28, RSR1	324	197	5557	0.696497	1	1	100
GOTERM_BP_DIRECT	GO:0007067~mitotic nuclear division	5	1.44509	0.95189	P32598, P40957, P33309, P06704, P00546	GLC7, MAD1, DOM34, CDC31, CDC28	324	131	5557	0.654627	1	1	100
UP_KEYWORDS	Cell cycle	10	2.89017	0.994919	P32598, P40957, P33309, P06704, Q08446, P32458, P06244, P00546, P13856, P53917	GLC7, MAD1, DOM34, CDC31, SGT1, CDC11, TPK1, CDC28, RSR1, FAR11	346	308	5914	0.554951	1	0.999975	100
GOTERM_BP_DIRECT	GO:0007049~cell cycle	10	2.89017	0.99514	P32598, P40957, P33309, P06704, Q08446, P32458, P06244, P00546, P13856, P53917	GLC7, MAD1, DOM34, CDC31, SGT1, CDC11, TPK1, CDC28, RSR1, FAR11	324	310	5557	0.553266	1	1	100
Annotation Cluster 43	Enrichment Score: 0.011596586046380478
Category	Term	Count	%	PValue	Genes/Uniprot	Gene Names	List Total	Pop Hits	Pop Total	Fold Enrichment	Bonferroni	Benjamini	FDR
UP_KEYWORDS	DNA repair	6	1.7341	0.953348	Q06337, P11633, P32787, Q03834, Q12432, P04912	EAF1, NHP6B, MGM101, MSH6, EAF3, HTA2	346	155	5914	0.661645	1	0.998639	100
GOTERM_BP_DIRECT	GO:0006281~DNA repair	7	2.02312	0.970494	Q06337, P11633, P32787, Q03834, Q12432, P33417, P04912	EAF1, NHP6B, MGM101, MSH6, EAF3, IXR1, HTA2	324	191	5557	0.628579	1	1	100
UP_KEYWORDS	DNA damage	6	1.7341	0.977047	Q06337, P11633, P32787, Q03834, Q12432, P04912	EAF1, NHP6B, MGM101, MSH6, EAF3, HTA2	346	173	5914	0.592803	1	0.999624	100
GOTERM_BP_DIRECT	GO:0006974~cellular response to DNA damage stimulus	6	1.7341	0.994154	Q06337, P11633, P32787, Q03834, Q12432, P04912	EAF1, NHP6B, MGM101, MSH6, EAF3, HTA2	324	206	5557	0.499551	1	1	100
Annotation Cluster 44	Enrichment Score: 0.008033204362493192
Category	Term	Count	%	PValue	Genes/Uniprot	Gene Names	List Total	Pop Hits	Pop Total	Fold Enrichment	Bonferroni	Benjamini	FDR
UP_KEYWORDS	mRNA processing	6	1.7341	0.970796	P32598, P32843, P32639, P40018, Q01159, P32335	GLC7, YME2, BRR2, SMB1, CEG1, MSS51	346	167	5914	0.614101	1	0.999422	100
GOTERM_BP_DIRECT	GO:0006397~mRNA processing	6	1.7341	0.977476	P32598, P32843, P32639, P40018, Q01159, P32335	GLC7, YME2, BRR2, SMB1, CEG1, MSS51	324	174	5557	0.591422	1	1	100
UP_KEYWORDS	mRNA splicing	3	0.867052	0.988239	P32639, P40018, P32335	BRR2, SMB1, MSS51	346	107	5914	0.479229	1	0.999878	100
GOTERM_BP_DIRECT	GO:0008380~RNA splicing	3	0.867052	0.99031	P32639, P40018, P32335	BRR2, SMB1, MSS51	324	111	5557	0.463547	1	1	100

## Sheet: Cluster 4
Annotation Cluster 1	Enrichment Score: 8.023477737502972
Category	Term	Count	%	PValue	Genes/Uniprot	Gene Names	List Total	Pop Hits	Pop Total	Fold Enrichment	Bonferroni	Benjamini	FDR
GOTERM_CC_DIRECT	GO:0030479~actin cortical patch	29	3.26945	4.05e-09	P32521, Q04439, Q08641, P37370, Q06449, P13517, Q08873, P34216, P40518, P39940, P39013, P33338, P38856, P43603, P40956, P47160, P60010, Q12271, P17555, P32790, Q03048, P38266, P32599, Q06440, P47117, P21576, P28495, Q12446, P33204	PAN1, MYO5, ABP140, VRP1, PIN3, CAP2, SCP1, EDE1, ARC15, RSP5, END3, SLA2, YAP1801, LSB3, GTS1, ENT3, ACT1, INP53, SRV2, SLA1, COF1, AIM3, SAC6, CRN1, ARP3, VPS1, CAP1, LAS17, ARC19	874	60	5861	3.24121	1.86e-06	6.2e-07	5.76e-06
GOTERM_MF_DIRECT	GO:0003779~actin binding	24	2.70575	1.15e-08	Q05933, P32521, Q04439, P17555, Q08641, P37370, P46681, P13517, P32790, Q03048, P19524, P32492, P32599, Q06440, P25637, P47117, P07274, P28495, P39013, P33204, Q12446, P33338, P08964, Q12017	ARC18, PAN1, MYO5, SRV2, ABP140, VRP1, DLD2, CAP2, SLA1, COF1, MYO2, MYO4, SAC6, CRN1, YIH1, ARP3, PFY1, CAP1, END3, ARC19, LAS17, SLA2, MYO1, PLP2	798	42	4885	3.49803	9.25e-06	9.25e-06	1.76e-05
UP_KEYWORDS	Actin-binding	20	2.25479	1.83e-08	Q05933, P32521, Q04439, P17555, Q08641, P13517, P32790, Q03048, P19524, P32492, P32599, Q06440, P25637, P47117, P07274, P28495, P39013, P33204, P33338, P08964	ARC18, PAN1, MYO5, SRV2, ABP140, CAP2, SLA1, COF1, MYO2, MYO4, SAC6, CRN1, YIH1, ARP3, PFY1, CAP1, END3, ARC19, SLA2, MYO1	887	33	5914	4.04086	5.5e-06	9.17e-07	2.45e-05
Annotation Cluster 2	Enrichment Score: 6.789258185305673
Category	Term	Count	%	PValue	Genes/Uniprot	Gene Names	List Total	Pop Hits	Pop Total	Fold Enrichment	Bonferroni	Benjamini	FDR
UP_KEYWORDS	Protein transport	104	11.7249	7.72e-10	P48837, Q08826, P11076, Q00776, P11075, Q07878, Q03790, P19524, P18759, P25385, P25386, Q06142, P01123, P57744, P53622, P14907, P14906, P32915, P39705, Q06263, Q08951, P14832, P38261, P47045, Q02776, Q02774, P22217, P80967, P39543, Q02630, P38153, P39685, P38555, P32803, P53507, P07560, P38759, P33332, Q03769, Q12071, P38753, Q06385, P47160, P53313, P39727, P33754, Q06245, P51996, Q02629, P53011,…	NUP57, SNX3, ARF1, APM1, SEC7, VPS13, NUP53, MYO2, SEC18, BOS1, USO1, KAP95, YPT1, TIM8, COP1, NSP1, SEC63, SEC61, NUP60, VTA1, APL5, CPR1, EXO84, TIM54, TIM50, SHR3, TRX1, TOM5, SOP4, NUP116, APM3, POM152, YPT31, EMP24, TOM7, SEC4, VPS29, SEC3, ENT5, VPS54, HSE1, VPS74, ENT3, SDA1, ERV46, SEC66, SEC10, YPT32, NUP100, SEH1, NUP2, SEC26, SEC9, VPS21, SEC17, TOM22, YPT52, NUP49, TIM13, VPS4, SEC23,…	887	389	5914	1.78255	2.32e-07	4.63e-08	1.03e-06
GOTERM_BP_DIRECT	GO:0015031~protein transport	104	11.7249	4.43e-09	P48837, Q08826, P11076, Q00776, P11075, Q07878, Q03790, P19524, P18759, P25385, P25386, Q06142, P01123, P57744, P53622, P14907, P14906, P32915, P39705, Q06263, Q08951, P14832, P38261, P47045, Q02776, Q02774, P22217, P80967, P39543, Q02630, P38153, P39685, P38555, P32803, P53507, P07560, P38759, P33332, Q03769, Q12071, P38753, Q06385, P47160, P53313, P39727, P33754, Q06245, P51996, Q02629, P53011,…	NUP57, SNX3, ARF1, APM1, SEC7, VPS13, NUP53, MYO2, SEC18, BOS1, USO1, KAP95, YPT1, TIM8, COP1, NSP1, SEC63, SEC61, NUP60, VTA1, APL5, CPR1, EXO84, TIM54, TIM50, SHR3, TRX1, TOM5, SOP4, NUP116, APM3, POM152, YPT31, EMP24, TOM7, SEC4, VPS29, SEC3, ENT5, VPS54, HSE1, VPS74, ENT3, SDA1, ERV46, SEC66, SEC10, YPT32, NUP100, SEH1, NUP2, SEC26, SEC9, VPS21, SEC17, TOM22, YPT52, NUP49, TIM13, VPS4, SEC23,…	856	391	5557	1.72673	6.56e-06	6.56e-06	7.35e-06
UP_KEYWORDS	Transport	173	19.5039	5.8e-06	P32386, P48837, P18239, P38272, Q08826, P05030, P39719, Q00776, P37296, P11076, P11075, Q03790, Q07878, P19524, P32492, P13587, Q06451, P13586, P25385, P18759, Q06143, P25386, Q06142, P01123, Q07478, P32610, P57744, Q02455, P53622, P14907, P14906, P39705, P32915, Q06263, P14832, Q08951, P38264, P38261, Q12125, P47045, Q02776, Q02774, P53241, P22217, P80967, Q02630, P39543, P81449, P32366, P17255,…	YBT1, NUP57, PET9, SHE3, SNX3, PMA1, FLC2, APM1, STV1, ARF1, SEC7, NUP53, VPS13, MYO2, MYO4, ENA1, TPO3, PMR1, BOS1, SEC18, DIC1, USO1, KAP95, YPT1, SUB2, VMA8, TIM8, MLP1, COP1, NSP1, SEC63, NUP60, SEC61, VTA1, CPR1, APL5, PHO88, EXO84, GET4, TIM54, TIM50, SHR3, VHT1, TRX1, TOM5, NUP116, SOP4, TIM11, VMA6, VMA1, APM3, POM152, VPH1, YPT31, EMP24, TOM7, SEC4, VPS29, SEC3, OSH7, ENT5, VMA13, HSE1, …	887	853	5914	1.35224	0.00173792	0.000134	0.00774774
GOTERM_BP_DIRECT	GO:0006810~transport	167	18.8275	3.51e-05	P32386, P48837, P18239, P38272, Q08826, P05030, P39719, Q00776, P37296, P11076, P11075, Q03790, Q07878, P19524, P32492, P13587, Q06451, P13586, P25385, P18759, Q06143, P25386, Q06142, P01123, Q07478, P32610, P57744, Q02455, P53622, P14907, P14906, P32916, P39705, P32915, Q06263, P14832, Q08951, P38264, P38261, Q12125, P47045, Q02776, Q02774, P53241, P80967, Q02630, P39543, P81449, P32366, P17255,…	YBT1, NUP57, PET9, SHE3, SNX3, PMA1, FLC2, APM1, STV1, ARF1, SEC7, NUP53, VPS13, MYO2, MYO4, ENA1, TPO3, PMR1, BOS1, SEC18, DIC1, USO1, KAP95, YPT1, SUB2, VMA8, TIM8, MLP1, COP1, NSP1, SEC63, SRP101, NUP60, SEC61, VTA1, CPR1, APL5, PHO88, EXO84, GET4, TIM54, TIM50, SHR3, VHT1, TOM5, NUP116, SOP4, TIM11, VMA6, VMA1, APM3, POM152, VPH1, YPT31, EMP24, TOM7, SEC4, VPS29, SEC3, OSH7, ENT5, VMA13, HSE1…	856	822	5557	1.3189	0.0506641	0.00432334	0.0582237
Annotation Cluster 3	Enrichment Score: 6.087930498571933
Category	Term	Count	%	PValue	Genes/Uniprot	Gene Names	List Total	Pop Hits	Pop Total	Fold Enrichment	Bonferroni	Benjamini	FDR
KEGG_PATHWAY	sce01130:Biosynthesis of antibiotics	76	8.56821	6.72e-10	P00925, P08566, P14742, P32861, P36010, Q05911, P06169, Q03786, P31116, P16387, P19262, P47176, Q04728, P25340, Q12055, P07244, P41338, P37262, P49095, P00358, P00560, P00359, P32377, P20049, P32476, P00942, P40495, P07170, P15019, P07172, P32473, Q03161, P11412, P07277, P53206, P12695, P32263, Q01802, P12709, P23542, P20967, P47154, P31373, P04076, P27616, P00950, P40510, P04046, P15274, P09624,…	ENO2, ARO1, GFA1, UGP1, YNK1, ADE13, PDC1, YDR248C, HOM6, PDA1, KGD2, BAT2, ARG7, ERG4, FAP7, ADE5,7, ERG10, SOL2, GCV2, TDH2, PGK1, TDH3, MVD1, TYR1, ERG1, TPI1, LYS12, ADK1, TAL1, HIS5, PDB1, YMR099C, ZWF1, ERG12, YGR012W, LAT1, PRO3, AAT1, PGI1, AAT2, KGD1, STE24, CYS3, ARG4, ADE1, GPM1, SER33, ADE4, AMD1, LPD1, HMG1, CDC19, HMG2, ARG8, ERG8, PGM3, SER1, ARG5,6, PRS4, SOL3, MET22, SDH1, GCV3, …	395	219	2194	1.92756	6.51e-08	3.26e-08	7.41e-07
KEGG_PATHWAY	sce01110:Biosynthesis of secondary metabolites	86	9.6956	5.98e-07	P06208, P29952, P00925, P08566, P00937, P39006, P36010, P00931, Q05911, P06169, P31116, Q03786, P16387, P19262, P47176, P18900, P07283, Q04728, Q12055, P07244, P41338, P37262, P00358, P49095, P00560, P00359, P32377, P32476, P20049, P00942, P07170, P15019, P07172, P32473, Q03161, P33734, P11412, P07277, P53206, P12695, P32263, P38787, Q12063, Q01802, P12709, P23542, P05373, P20967, P04076, P27616,…	LEU4, PMI40, ENO2, ARO1, TRP3, PSD1, YNK1, TRP5, ADE13, PDC1, HOM6, YDR248C, PDA1, KGD2, BAT2, COQ1, SEC53, ARG7, FAP7, ADE5,7, ERG10, SOL2, TDH2, GCV2, PGK1, TDH3, MVD1, ERG1, TYR1, TPI1, ADK1, TAL1, HIS5, PDB1, YMR099C, HIS7, ZWF1, ERG12, YGR012W, LAT1, PRO3, PAN5, NUS1, AAT1, PGI1, AAT2, HEM2, KGD1, ARG4, ADE1, GPM1, AMD1, ADE4, LPD1, FEN1, HMG1, CDC19, HMG2, ARG8, SLC1, ERG8, PAN6, PGM3, PSA1…	395	296	2194	1.61379	5.8e-05	1.93e-05	0.00066
KEGG_PATHWAY	sce01100:Metabolic pathways	162	18.2638	4.84e-06	P06208, P08566, P09938, P39006, P39107, P37296, P36010, P37297, P06785, P06169, Q03786, P16387, P07245, P32610, P38875, P07244, P47124, P49095, P00358, P00359, P00560, P32377, P32476, P20049, P40495, P07170, P07172, P32473, P15454, P33734, P32629, Q04080, P32626, P25374, P12709, P23542, P05373, P32366, P17255, P39683, P20967, P31373, P04076, P27616, Q08686, P04046, P32563, P09624, P00549, P18544,…	LEU4, ARO1, RNR2, PSD1, MNN9, STV1, YNK1, STT4, CDC21, PDC1, YDR248C, PDA1, ADE3, VMA8, GPI16, ADE5,7, HOC1, GCV2, TDH2, TDH3, PGK1, MVD1, ERG1, TYR1, LYS12, ADK1, HIS5, PDB1, GUK1, HIS7, ANP1, GPI17, UTR4, NFS1, PGI1, AAT2, HEM2, VMA6, VMA1, NPT1, KGD1, CYS3, ARG4, ADE1, TUM1, ADE4, VPH1, LPD1, CDC19, ARG8, SLC1, ERG8, VMA13, SER1, PGM3, PSA1, HIS4, LAP2, DFR1, SOL3, MET22, SDH1, GCV3, OST1, LCB…	395	685	2194	1.3136	0.000469	0.000117	0.00534002
KEGG_PATHWAY	sce01230:Biosynthesis of amino acids	39	4.39684	0.000229	P23542, P06208, P00925, P52893, P00937, P08566, P31373, P04076, P00931, P40510, P00950, P00549, P18544, P32327, P31116, P33330, P00815, P47176, Q04728, Q01217, P38063, P00358, P38999, P00560, P00359, P38998, P16861, P16862, P00942, P40495, P54885, P15019, P07172, P33734, P53206, P32263, Q12040, Q01802, P05150	AAT2, LEU4, ENO2, ALT1, TRP3, ARO1, CYS3, ARG4, TRP5, SER33, GPM1, CDC19, ARG8, PYC2, HOM6, SER1, HIS4, BAT2, ARG7, ARG5,6, PRS4, TDH2, LYS9, PGK1, TDH3, LYS1, PFK1, PFK2, TPI1, LYS12, PRO2, TAL1, HIS5, HIS7, YGR012W, PRO3, YOR283W, AAT1, ARG3	395	123	2194	1.76116	0.0219769	0.00369681	0.252499
Annotation Cluster 4	Enrichment Score: 5.910689905563835
Category	Term	Count	%	PValue	Genes/Uniprot	Gene Names	List Total	Pop Hits	Pop Total	Fold Enrichment	Bonferroni	Benjamini	FDR
GOTERM_CC_DIRECT	GO:0005794~Golgi apparatus	69	7.77903	2.35e-08	P35725, P27810, Q08826, P39107, P11076, P37296, P06780, P11075, P38130, P46985, Q03337, Q07878, P15303, P13586, P25385, P18759, P34237, P39940, P25386, P01123, P47818, P40531, P47124, P53622, Q08951, P27809, P32629, P25375, P22217, P20606, P40482, P22211, P32074, P53192, P38153, P53959, P32660, Q08484, P09620, Q06704, P38555, P32803, Q12071, P38068, P47160, Q06385, P39727, Q12246, P38810, P43621,…	YKL063C, KTR1, SNX3, MNN9, ARF1, STV1, RHO1, SEC7, KTR3, MNN11, TRS31, VPS13, SEC23, PMR1, BOS1, SEC18, COY1, RSP5, USO1, YPT1, CCC1, GVP36, HOC1, COP1, APL5, KRE2, ANP1, PRD1, TRX1, SAR1, SEC24, NPR1, SEC21, GET1, APM3, COG6, DNF1, GYP1, KEX1, IMH1, YPT31, EMP24, VPS54, GRX7, ENT3, VPS74, ERV46, LCB4, SFB3, RET2, YIF1, RTN1, SYG1, YPT32, GGA2, SEC26, YPR089W, PIS1, GET3, KEI1, YKT6, MTC1, DOP1, …	874	238	5861	1.94416	1.08e-05	2.7e-06	3.34e-05
UP_KEYWORDS	Golgi apparatus	56	6.31342	1.04e-06	P27810, Q08826, P39107, P11076, P37296, P11075, P46985, Q03337, Q07878, P15303, P13586, P25385, P34237, P25386, P01123, P47818, P40531, P53622, P47124, Q08951, P27809, P32629, P22217, P20606, P40482, P32074, P53192, P38153, P53959, P32660, Q08484, P09620, Q06704, P38555, P32803, Q12071, Q06385, P47160, P39727, Q12246, P38810, P43621, P53845, P51996, P41810, P38817, O13585, Q06346, Q12154, Q03921,…	KTR1, SNX3, MNN9, ARF1, STV1, SEC7, MNN11, TRS31, VPS13, SEC23, PMR1, BOS1, COY1, USO1, YPT1, CCC1, GVP36, COP1, HOC1, APL5, KRE2, ANP1, TRX1, SAR1, SEC24, SEC21, GET1, APM3, COG6, DNF1, GYP1, KEX1, IMH1, YPT31, EMP24, VPS54, VPS74, ENT3, ERV46, LCB4, SFB3, RET2, YIF1, YPT32, SEC26, GGA2, YPR089W, KEI1, GET3, DOP1, PEP1, KES1, APS3, SWH1, EMP47, LDB19	887	195	5914	1.91475	0.000311	3.11e-05	0.00138548
GOTERM_CC_DIRECT	GO:0000139~Golgi membrane	39	4.39684	7.61e-05	P53192, P27810, Q08826, P53959, P39107, P37296, Q06704, P38555, P32803, P15303, P07560, P13586, P25385, P34237, P25386, P01123, P47818, P48415, P40531, P53622, P39727, Q12246, P38810, P53845, P43621, P51996, P41810, Q06346, P27809, P32629, Q03921, P35844, P35845, P22217, P43555, Q04491, P20606, P40482, P32074	GET1, KTR1, SNX3, COG6, MNN9, STV1, IMH1, YPT31, EMP24, SEC23, SEC4, PMR1, BOS1, COY1, USO1, YPT1, CCC1, SEC16, GVP36, COP1, ERV46, LCB4, SFB3, YIF1, RET2, YPT32, SEC26, KEI1, KRE2, ANP1, DOP1, KES1, SWH1, TRX1, EMP47, SEC13, SAR1, SEC24, SEC21	874	138	5861	1.89516	0.0344207	0.00269076	0.108308
Annotation Cluster 5	Enrichment Score: 4.808060990554361
Category	Term	Count	%	PValue	Genes/Uniprot	Gene Names	List Total	Pop Hits	Pop Total	Fold Enrichment	Bonferroni	Benjamini	FDR
UP_KEYWORDS	Cytoplasmic vesicle	21	2.36753	3.05e-06	P47160, P38153, P53845, P17891, P43621, Q08951, P38261, Q00776, P41810, P15303, P47018, P07560, P47064, P25386, P22137, Q04491, P14359, P20606, P53622, P40482, P32074	ENT3, APM3, YIF1, CLC1, RET2, APL5, EXO84, APM1, SEC26, SEC23, MTC1, SEC4, APS3, USO1, CHC1, SEC13, SNA3, SAR1, COP1, SEC24, SEC21	887	46	5914	3.04382	0.000913	7.61e-05	0.00407043
GOTERM_CC_DIRECT	GO:0031410~cytoplasmic vesicle	22	2.48027	3.09e-06	P47160, P38153, P53845, P17891, P43621, Q08951, P38261, Q00776, P41810, P15303, P47018, P07560, P47064, P25386, P01123, P22137, Q04491, P14359, P20606, P53622, P40482, P32074	ENT3, APM3, YIF1, CLC1, RET2, APL5, EXO84, APM1, SEC26, SEC23, MTC1, SEC4, APS3, USO1, YPT1, CHC1, SEC13, SNA3, SAR1, COP1, SEC24, SEC21	874	50	5861	2.95062	0.00142023	0.000158	0.00439694
GOTERM_BP_DIRECT	GO:0006886~intracellular protein transport	29	3.26945	0.0004	P38153, P32867, P52870, P40343, P32660, Q00776, Q08484, P15303, P38759, Q06142, P38753, P25386, P53622, P33307, P38810, P17891, Q08951, P30822, P41810, P38817, P32602, P49334, P47064, P22137, Q12344, P20606, P07213, P40482, P32074	APM3, SSO1, SBH1, VPS27, DNF1, APM1, GYP1, SEC23, VPS29, KAP95, HSE1, USO1, COP1, CSE1, SFB3, CLC1, APL5, CRM1, SEC26, GGA2, SEC17, TOM22, APS3, CHC1, GYP5, SAR1, TOM70, SEC24, SEC21	856	96	5557	1.96107	0.447146	0.0291983	0.661684
Annotation Cluster 6	Enrichment Score: 4.754141868985447
Category	Term	Count	%	PValue	Genes/Uniprot	Gene Names	List Total	Pop Hits	Pop Total	Fold Enrichment	Bonferroni	Benjamini	FDR
GOTERM_CC_DIRECT	GO:0043332~mating projection tip	40	4.50958	2.17e-07	Q04439, P32521, Q08641, P53739, P37370, Q00362, P06780, P32566, P53894, Q00772, P13517, P19524, P07560, P34216, P33332, P18759, P25694, P39013, P38853, Q07657, Q03559, P33338, P25342, P17555, P32855, P38810, Q06245, P38261, P11433, P32790, P32599, P23201, Q02774, P25623, Q05518, P28495, P29366, Q12446, P89102, P19073	MYO5, PAN1, ABP140, FPK1, VRP1, CDC55, RHO1, SMI1, CBK1, SLT2, CAP2, MYO2, SEC4, EDE1, SEC3, SEC18, CDC48, END3, KEL1, SHS1, YMR295C, SLA2, CDC10, SRV2, SEC8, SFB3, SEC10, EXO84, CDC24, SLA1, SAC6, SPA2, SHR3, SYP1, PAL1, CAP1, BEM1, LAS17, SEC5, CDC42	874	115	5861	2.3325	0.0001	1.67e-05	0.000309
GOTERM_CC_DIRECT	GO:0005935~cellular bud neck	54	6.08794	1.97e-06	P32521, P08018, P40075, P37304, P53141, P37370, P32660, Q00362, P06780, P32566, P27637, P53894, Q00772, P39969, P19524, P07560, P34216, Q02959, P25618, P33332, P12688, P32468, P24583, Q12263, Q07657, P38853, P24276, P08964, P25342, P33338, P38856, P43603, P40956, Q12451, P25293, P32855, Q06245, P51996, P38261, P11433, P40357, P32790, P38903, P23201, P32457, P25623, P40484, P28495, Q05518, P38217,…	PAN1, PBS2, SCS2, PAM1, MLC1, VRP1, DNF1, CDC55, RHO1, SMI1, BUD14, CBK1, SLT2, BOI2, MYO2, SEC4, EDE1, HOS3, CWH43, SEC3, YPK1, CDC12, PKC1, GIN4, SHS1, KEL1, SSD1, MYO1, CDC10, SLA2, YAP1801, LSB3, GTS1, OSH2, NAP1, SEC8, SEC10, YPT32, EXO84, CDC24, SEC9, SLA1, RTS1, SPA2, CDC3, SYP1, MOB1, CAP1, PAL1, KAP104, BEM1, GYP5, SEC5, CDC42	874	190	5861	1.9059	0.000905	0.000113	0.00279966
GOTERM_CC_DIRECT	GO:0005934~cellular bud tip	32	3.60767	2.99e-05	P08018, P40075, P53141, P38272, Q00362, P06780, P27637, P53894, Q00772, P13517, P19524, P32492, P34216, P33332, P25618, P39940, P38853, P33338, P32855, P11433, P38261, P53924, P23201, P32599, P25623, Q05518, P28495, P38217, Q12344, P29366, P89102, P19073	PBS2, SCS2, MLC1, SHE3, CDC55, RHO1, BUD14, CBK1, SLT2, CAP2, MYO2, MYO4, EDE1, SEC3, CWH43, RSP5, KEL1, SLA2, SEC8, CDC24, EXO84, DMA2, SPA2, SAC6, SYP1, PAL1, CAP1, KAP104, GYP5, BEM1, SEC5, CDC42	874	100	5861	2.1459	0.0136823	0.00137673	0.0426136
GOTERM_CC_DIRECT	GO:0000131~incipient cellular bud site	18	2.02931	0.00751487	P32855, P37370, P06780, P11433, P38261, P32566, P27637, P53894, P19524, P07560, P23201, P33332, Q12344, P29366, P89102, P19073, P33338, P08964	SEC8, VRP1, RHO1, CDC24, EXO84, SMI1, BUD14, CBK1, MYO2, SEC4, SPA2, SEC3, GYP5, BEM1, SEC5, CDC42, SLA2, MYO1	874	62	5861	1.94689	0.96888	0.116554	10.179
Annotation Cluster 7	Enrichment Score: 4.3932791280488805
Category	Term	Count	%	PValue	Genes/Uniprot	Gene Names	List Total	Pop Hits	Pop Total	Fold Enrichment	Bonferroni	Benjamini	FDR
GOTERM_BP_DIRECT	GO:0055114~oxidation-reduction process	84	9.47012	1.13e-05	P08566, P38230, P37304, Q07589, P09938, P10662, P00427, P54783, P31116, P16387, P32340, P07245, P25340, P43561, P38993, P00358, P49095, P00359, P53183, P40029, Q03835, P28625, P32476, P20049, P40495, P16603, P32473, P42940, P36046, P00127, P08067, P11412, P21375, P22217, P39976, P38115, P17695, P32263, P38787, P38694, P00447, P00445, P53912, P20967, Q12404, P46681, P40510, Q12068, P09624, P12683,…	ARO1, ZTA1, PAM1, YDL144C, RNR2, MRP1, COX6, ALO1, HOM6, PDA1, NDI1, ADE3, ERG4, FET5, FET3, TDH2, GCV2, TDH3, YGL039W, MXR1, GRX3;GRX4, YIM1, ERG1, TYR1, LYS12, NCP1, PDB1, CIR1, MIA40, QCR6, RIP1, ZWF1, OSM1, TRX1, DLD3, ARA1, GRX2, PRO3, PAN5, MSC7, SOD2, SOD1, YNL134C, KGD1, MPD1, DLD2, SER33, GRE2, LPD1, HMG1, HMG2, ACP1, YMR226C, DOT5, GRX7, HIS4, YPR1, TSA1, DLD1, ARG5,6, OYE2, DFR1, SDH1,…	856	347	5557	1.57151	0.0166657	0.00186561	0.018824
UP_KEYWORDS	Oxidoreductase	64	7.21533	3.18e-05	P08566, P38230, P09938, P00427, P54783, P31116, P16387, P32340, P07245, P25340, P43561, P38993, P49095, P00358, P00359, P53183, P40029, P20049, P32476, P40495, P16603, P32473, P36046, P08067, P11412, P21375, P38115, P39976, P32263, P38787, P38694, P00447, P00445, P20967, P46681, P40510, P09624, Q12068, P12683, P12684, Q05016, P40553, P00815, P34760, Q12458, P32891, Q01217, Q03558, P07807, Q00711,…	ARO1, ZTA1, RNR2, COX6, ALO1, HOM6, PDA1, NDI1, ADE3, ERG4, FET5, FET3, GCV2, TDH2, TDH3, YGL039W, MXR1, TYR1, ERG1, LYS12, NCP1, PDB1, MIA40, RIP1, ZWF1, OSM1, ARA1, DLD3, PRO3, PAN5, MSC7, SOD2, SOD1, KGD1, DLD2, SER33, LPD1, GRE2, HMG1, HMG2, YMR226C, DOT5, HIS4, TSA1, YPR1, DLD1, ARG5,6, OYE2, DFR1, SDH1, LYS9, LYS1, ERV1, PRO2, CBR1, IFA38, AHP1, ETR1, MTD1, MDH3, ERG26, TRR1, RNR4, PDX3	887	258	5914	1.65393	0.00948076	0.000635	0.042423
GOTERM_MF_DIRECT	GO:0016491~oxidoreductase activity	72	8.11725	0.000183	P08566, P38230, P37304, Q07589, P09938, P00427, P54783, P31116, P16387, P32340, P07245, P25340, P43561, P38993, P49095, P00358, P00359, Q06839, P53183, P40029, P28625, P20049, P32476, P40495, P16603, P32473, P36046, P08067, P11412, P21375, P39976, P38115, P32263, P38787, P38694, P00447, P00445, P53912, P20967, P46681, P40510, P09624, Q12068, P12683, P12684, Q05016, P40553, P00815, Q12458, P34760,…	ARO1, ZTA1, PAM1, YDL144C, RNR2, COX6, ALO1, HOM6, PDA1, NDI1, ADE3, ERG4, FET5, FET3, GCV2, TDH2, TDH3, YPR097W, YGL039W, MXR1, YIM1, TYR1, ERG1, LYS12, NCP1, PDB1, MIA40, RIP1, ZWF1, OSM1, DLD3, ARA1, PRO3, PAN5, MSC7, SOD2, SOD1, YNL134C, KGD1, DLD2, SER33, LPD1, GRE2, HMG1, HMG2, YMR226C, DOT5, HIS4, YPR1, TSA1, DLD1, ARG5,6, OYE2, DFR1, SDH1, LYS9, LYS1, ERV1, RIB5, PRO2, CBR1, IFA38, AHP1, …	798	292	4885	1.50942	0.137605	0.0291742	0.281516
Annotation Cluster 8	Enrichment Score: 4.136644454008064
Category	Term	Count	%	PValue	Genes/Uniprot	Gene Names	List Total	Pop Hits	Pop Total	Fold Enrichment	Bonferroni	Benjamini	FDR
GOTERM_CC_DIRECT	GO:0030479~actin cortical patch	29	3.26945	4.05e-09	P32521, Q04439, Q08641, P37370, Q06449, P13517, Q08873, P34216, P40518, P39940, P39013, P33338, P38856, P43603, P40956, P47160, P60010, Q12271, P17555, P32790, Q03048, P38266, P32599, Q06440, P47117, P21576, P28495, Q12446, P33204	PAN1, MYO5, ABP140, VRP1, PIN3, CAP2, SCP1, EDE1, ARC15, RSP5, END3, SLA2, YAP1801, LSB3, GTS1, ENT3, ACT1, INP53, SRV2, SLA1, COF1, AIM3, SAC6, CRN1, ARP3, VPS1, CAP1, LAS17, ARC19	874	60	5861	3.24121	1.86e-06	6.2e-07	5.76e-06
GOTERM_CC_DIRECT	GO:0005856~cytoskeleton	35	3.94589	0.00827345	P43638, Q05933, P32521, Q04439, Q08641, P37370, Q06449, P13517, P39969, P40457, Q08873, P40518, P39940, P48606, P25386, P40414, P24583, P17536, P39013, P53168, P36094, P33338, P60010, P17555, P09734, P09733, P02557, P32790, Q03048, P47117, P07274, P40484, P21576, P33204, P29366	MHP1, ARC18, PAN1, MYO5, ABP140, VRP1, PIN3, CAP2, BOI2, MLP2, SCP1, ARC15, RSP5, RBL2, USO1, TPM2, PKC1, TPM1, END3, DUO1, SPC42, SLA2, ACT1, SRV2, TUB3, TUB1, TUB2, SLA1, COF1, ARP3, PFY1, MOB1, VPS1, ARC19, BEM1	874	152	5861	1.54413	0.978108	0.119607	11.1511
UP_KEYWORDS	Cytoskeleton	34	3.83315	0.0116263	P43638, Q05933, P32521, Q04439, Q08641, P37370, Q06449, P13517, P39969, P40457, Q08873, P40518, P39940, P48606, P25386, P40414, P17536, P39013, P53168, P36094, P33338, P60010, P17555, P09734, P09733, P02557, P32790, Q03048, P47117, P07274, P40484, P21576, P33204, P29366	MHP1, ARC18, PAN1, MYO5, ABP140, VRP1, PIN3, CAP2, BOI2, MLP2, SCP1, ARC15, RSP5, RBL2, USO1, TPM2, TPM1, END3, DUO1, SPC42, SLA2, ACT1, SRV2, TUB3, TUB1, TUB2, SLA1, COF1, ARP3, PFY1, MOB1, VPS1, ARC19, BEM1	887	149	5914	1.52142	0.970053	0.076639	14.4675
Annotation Cluster 9	Enrichment Score: 4.120006991296187
Category	Term	Count	%	PValue	Genes/Uniprot	Gene Names	List Total	Pop Hits	Pop Total	Fold Enrichment	Bonferroni	Benjamini	FDR
UP_KEYWORDS	Proteasome	26	2.93123	2.08e-13	P40327, P40302, P22141, P40016, P23724, P32379, P25451, P32565, P33297, P33298, P33299, P32496, P30657, Q01939, Q04062, P25043, P38737, P38764, P53549, Q06103, P38886, Q12377, P21242, Q12250, P21243, Q08723	RPT2, PRE5, PRE1, RPN3, PRE7, PUP2, PUP3, RPN2, RPT5, RPT3, RPT1, RPN12, PRE4, RPT6, RPN9, PUP1, ECM29, RPN1, RPT4, RPN7, RPN10, RPN6, PRE10, RPN5, SCL1, RPN8	887	36	5914	4.81536	6.24e-11	2.08e-11	2.78e-10
GOTERM_CC_DIRECT	GO:0000502~proteasome complex	29	3.26945	9.03e-13	P40327, P40302, P23724, P40016, P32565, P30657, Q01939, P38737, Q06103, P53549, Q12377, P21242, P21243, P22141, P32379, P25451, P33297, P33298, P32496, P33299, Q04062, P25043, P06104, P38764, P21734, P43593, P38886, Q12250, Q08723	RPT2, PRE5, PRE7, RPN3, RPN2, PRE4, RPT6, ECM29, RPN7, RPT4, RPN6, PRE10, SCL1, PRE1, PUP2, PUP3, RPT5, RPT3, RPN12, RPT1, RPN9, PUP1, RAD6, RPN1, UBC1, UBP6, RPN10, RPN5, RPN8	874	46	5861	4.22766	4.16e-10	2.08e-10	1.29e-09
KEGG_PATHWAY	sce03050:Proteasome	25	2.81849	4.1e-11	P40327, P40302, P23724, P40016, P32565, P30657, Q01939, Q06103, P53549, Q12377, P21242, P21243, P22141, P32379, P25451, P33297, P33298, P33299, P32496, Q04062, P25043, P38764, P38886, Q12250, Q08723	RPT2, PRE5, PRE7, RPN3, RPN2, PRE4, RPT6, RPN7, RPT4, RPN6, PRE10, SCL1, PRE1, PUP2, PUP3, RPT5, RPT3, RPT1, RPN12, RPN9, PUP1, RPN1, RPN10, RPN5, RPN8	395	35	2194	3.96745	3.97e-09	3.97e-09	4.52e-08
GOTERM_BP_DIRECT	GO:0006511~ubiquitin-dependent protein catabolic process	30	3.38219	5.6e-08	P40327, P40302, P38349, P52286, P40016, P32565, Q01476, P53044, P48582, P39940, P41920, Q06103, Q12377, P21242, P21243, P40087, P32379, P33297, P33298, P32496, P33299, P54860, P50101, Q04062, P38764, P43593, P38886, Q12250, Q08723, Q12018	RPT2, PRE5, UBX7, SKP1, RPN3, RPN2, UBP2, UFD1, BRO1, RSP5, YRB1, RPN7, RPN6, PRE10, SCL1, DDI1, PUP2, RPT5, RPT3, RPN12, RPT1, UFD2, UBP15, RPN9, RPN1, UBP6, RPN10, RPN5, RPN8, CDC53	856	68	5557	2.86404	8.3e-05	2.77e-05	9.29e-05
GOTERM_CC_DIRECT	GO:0034515~proteasome storage granule	17	1.91657	6.3e-08	P40302, P22141, P23724, P32379, P25451, P32565, P32496, P30657, Q01939, Q04062, P25043, P38764, Q12377, P21242, Q12250, P21243, Q08723	PRE5, PRE1, PRE7, PUP2, PUP3, RPN2, RPN12, PRE4, RPT6, RPN9, PUP1, RPN1, RPN6, PRE10, RPN5, SCL1, RPN8	874	26	5861	4.38466	2.9e-05	5.79e-06	8.96e-05
GOTERM_BP_DIRECT	GO:0043161~proteasome-mediated ubiquitin-dependent protein catabolic process	22	2.48027	7.61e-06	P40302, P22141, P23724, P32379, P25451, P32565, P10591, P32496, P30657, Q01939, P25043, P53044, P34223, P39940, P38764, P25694, Q06103, P38886, P21242, Q12250, P21243, Q08723	PRE5, PRE1, PRE7, PUP2, PUP3, RPN2, SSA1, RPN12, PRE4, RPT6, PUP1, UFD1, SHP1, RSP5, RPN1, CDC48, RPN7, RPN10, PRE10, RPN5, SCL1, RPN8	856	51	5557	2.80039	0.0112141	0.00187781	0.0126319
GOTERM_BP_DIRECT	GO:0051603~proteolysis involved in cellular protein catabolic process	13	1.46561	7.33e-05	P25043, P40302, P22141, P32898, P23724, P32379, P25451, P27614, P09620, P30657, P21242, Q06010, P21243	PUP1, PRE5, PRE1, CYM1, PRE7, PUP2, PUP3, CPS1, KEX1, PRE4, PRE10, STE23, SCL1	856	24	5557	3.5164	0.102871	0.00772402	0.121527
UP_KEYWORDS	Threonine protease	9	1.01466	0.000318	P25043, P40302, P22141, P23724, P32379, P25451, P30657, P21242, P21243	PUP1, PRE5, PRE1, PRE7, PUP2, PUP3, PRE4, PRE10, SCL1	887	14	5914	4.2862	0.0910699	0.00476298	0.424429
GOTERM_MF_DIRECT	GO:0004175~endopeptidase activity	11	1.24014	0.000487	P25043, P40302, P22141, P38764, P23724, P32379, P25451, P32565, P30657, P21242, P21243	PUP1, PRE5, PRE1, RPN1, PRE7, PUP2, PUP3, RPN2, PRE4, PRE10, SCL1	798	20	4885	3.36685	0.324814	0.0545645	0.745152
GOTERM_CC_DIRECT	GO:0005839~proteasome core complex	9	1.01466	0.000569	P25043, P40302, P22141, P23724, P32379, P25451, P30657, P21242, P21243	PUP1, PRE5, PRE1, PRE7, PUP2, PUP3, PRE4, PRE10, SCL1	874	15	5861	4.02357	0.23046	0.0173125	0.807185
GOTERM_MF_DIRECT	GO:0004298~threonine-type endopeptidase activity	9	1.01466	0.00058	P25043, P40302, P22141, P23724, P32379, P25451, P30657, P21242, P21243	PUP1, PRE5, PRE1, PRE7, PUP2, PUP3, PRE4, PRE10, SCL1	798	14	4885	3.93528	0.373655	0.0506558	0.886973
INTERPRO	IPR001353:Proteasome, subunit alpha/beta	9	1.01466	0.000707	P25043, P40302, P22141, P23724, P32379, P25451, P30657, P21242, P21243	PUP1, PRE5, PRE1, PRE7, PUP2, PUP3, PRE4, PRE10, SCL1	849	14	5053	3.8261	0.662958	0.238059	1.17154
GOTERM_BP_DIRECT	GO:0010499~proteasomal ubiquitin-independent protein catabolic process	9	1.01466	0.000713	P25043, P40302, P22141, P23724, P32379, P25451, P30657, P21242, P21243	PUP1, PRE5, PRE1, PRE7, PUP2, PUP3, PRE4, PRE10, SCL1	856	15	5557	3.89509	0.652112	0.0468608	1.17579
COG_ONTOLOGY	Posttranslational modification, protein turnover, chaperones	33	3.72041	0.00259009	P40327, P40302, P47133, P52286, P23724, P47154, P42934, P32565, P30657, Q01939, P35191, P18759, P53549, Q06103, Q12377, P21242, P21243, P53940, P38323, P40970, P33297, Q03280, P33298, P46971, P33299, P54860, P50101, P25043, P38764, P25374, Q12449, Q06010, Q12018	RPT2, PRE5, EMC2, SKP1, PRE7, STE24, PMT6, RPN2, PRE4, RPT6, MDJ1, SEC18, RPT4, RPN7, RPN6, PRE10, SCL1, APJ1, MCX1, LCB2, RPT5, TOM1, RPT3, PMT4, RPT1, UFD2, UBP15, PUP1, RPN1, NFS1, AHA1, STE23, CDC53	211	95	977	1.60843	0.103202	0.103202	2.37166
GOTERM_CC_DIRECT	GO:0019774~proteasome core complex, beta-subunit complex	5	0.563698	0.0117501	P25043, P22141, P23724, P25451, P30657	PUP1, PRE1, PRE7, PUP3, PRE4	874	7	5861	4.78996	0.995648	0.147782	15.4825
INTERPRO	IPR023333:Proteasome B-type subunit	5	0.563698	0.017994	P25043, P22141, P23724, P25451, P30657	PUP1, PRE1, PRE7, PUP3, PRE4	849	7	5053	4.25122	1	0.806553	26.1115
INTERPRO	IPR016050:Proteasome, beta-type subunit, conserved site	5	0.563698	0.0489555	P25043, P22141, P23724, P25451, P30657	PUP1, PRE1, PRE7, PUP3, PRE4	849	9	5053	3.3065	1	0.954405	56.6785
GOTERM_CC_DIRECT	GO:0019773~proteasome core complex, alpha-subunit complex	4	0.450958	0.0723616	P40302, P32379, P21242, P21243	PRE5, PUP2, PRE10, SCL1	874	7	5861	3.83197	1	0.478959	65.664
INTERPRO	IPR000426:Proteasome, alpha-subunit, N-terminal domain	4	0.450958	0.0972665	P40302, P32379, P21242, P21243	PRE5, PUP2, PRE10, SCL1	849	7	5053	3.40098	1	0.990234	81.8293
INTERPRO	IPR023332:Proteasome A-type subunit	4	0.450958	0.0972665	P40302, P32379, P21242, P21243	PRE5, PUP2, PRE10, SCL1	849	7	5053	3.40098	1	0.990234	81.8293
SMART	SM00948:SM00948	4	0.450958	0.133234	P40302, P32379, P21242, P21243	PRE5, PUP2, PRE10, SCL1	341	7	1776	2.97612	1	0.971526	83.8847
GOTERM_CC_DIRECT	GO:0042175~nuclear outer membrane-endoplasmic reticulum membrane network	5	0.563698	0.240116	P40302, P32379, P38934, P21242, P21243	PRE5, PUP2, BFR1, PRE10, SCL1	874	17	5861	1.97234	1	0.806098	97.9916
Annotation Cluster 10	Enrichment Score: 3.76869153326516
Category	Term	Count	%	PValue	Genes/Uniprot	Gene Names	List Total	Pop Hits	Pop Total	Fold Enrichment	Bonferroni	Benjamini	FDR
UP_KEYWORDS	Nucleotide-binding	165	18.602	1.1e-07	P32386, P08566, P40340, P40341, Q08965, P06782, P05030, P06781, P06780, P11076, P36010, P40348, P21965, P32485, P37297, Q00772, Q01939, P19524, P32492, Q03434, P13587, P13586, P18759, P04803, Q03786, P24583, P07245, P01123, Q07478, P07244, P08964, P00560, P09734, P32377, P09733, P32916, P33297, P33298, P33299, P07170, P30665, P15454, P40339, P06104, P21576, P38691, P36101, P22211, Q04439, P29468,…	YBT1, ARO1, YTA7, YTA12, BMS1, SNF1, PMA1, RHO2, RHO1, ARF1, YNK1, RFC2, MCK1, HOG1, STT4, SLT2, RPT6, MYO2, MYO4, TY1B-ML2;TY1B-JR1, ENA1, PMR1, SEC18, MSW1, YDR248C, PKC1, ADE3, YPT1, SUB2, ADE5,7, MYO1, PGK1, TUB3, MVD1, TUB1, SRP101, RPT5, RPT3, RPT1, ADK1, MCM4, GUK1, RFC4, RAD6, VPS1, KSP1, TCD2, NPR1, MYO5, PAP1, VMA1, MCM6, SRS2, SSA1, PSK1, ADE1, RIA1, CBK1, YPT31, PHO85, SEC4, CDC19, TC…	887	760	5914	1.44753	3.31e-05	4.73e-06	0.000148
GOTERM_MF_DIRECT	GO:0000166~nucleotide binding	179	20.1804	1.7e-05	P10080, P32386, P08566, P40340, P40341, P06782, Q08965, P05030, P06781, P40348, P06780, P11076, P36010, P21965, P32485, P37297, Q00772, Q01939, P32588, Q03790, P19524, P32492, Q03434, P13587, P13586, P18759, P04803, Q03786, P24583, P07245, P01123, Q07478, P07244, P08964, P39927, P00560, P09734, P32377, P09733, P32916, P33297, P33298, P07170, P33299, P30665, P15454, P40339, P06104, P21576, P38691,…	SBP1, YBT1, ARO1, YTA7, YTA12, SNF1, BMS1, PMA1, RHO2, RFC2, RHO1, ARF1, YNK1, MCK1, HOG1, STT4, SLT2, RPT6, PUB1, NUP53, MYO2, MYO4, TY1B-ML2;TY1B-JR1, ENA1, PMR1, SEC18, MSW1, YDR248C, PKC1, ADE3, YPT1, SUB2, ADE5,7, MYO1, PTI1, PGK1, TUB3, MVD1, TUB1, SRP101, RPT5, RPT3, ADK1, RPT1, MCM4, GUK1, RFC4, RAD6, VPS1, KSP1, JSN1, TCD2, NPR1, MYO5, PAP1, VMA1, MCM6, SRS2, SSA1, PSK1, ADE1, RIA1, CBK1…	798	834	4885	1.31386	0.0136305	0.00683864	0.0261315
UP_KEYWORDS	ATP-binding	129	14.5434	0.000358	P32386, P08566, P40340, P40341, Q08965, P06782, P05030, P36010, P40348, P21965, P32485, P37297, Q00772, Q01939, P19524, P32492, Q03434, P13587, P13586, P18759, P04803, Q03786, P24583, P07245, Q07478, P07244, P08964, P00560, P32377, P33297, P33298, P33299, P07170, P30665, P40339, P15454, P06104, P38691, P36101, P22211, Q04439, P29468, P17255, P53091, P12954, P10591, P31374, P27616, P53894, P17157,…	YBT1, ARO1, YTA7, YTA12, BMS1, SNF1, PMA1, YNK1, RFC2, MCK1, HOG1, STT4, SLT2, RPT6, MYO2, MYO4, TY1B-ML2;TY1B-JR1, ENA1, PMR1, SEC18, MSW1, YDR248C, PKC1, ADE3, SUB2, ADE5,7, MYO1, PGK1, MVD1, RPT5, RPT3, RPT1, ADK1, MCM4, RFC4, GUK1, RAD6, KSP1, TCD2, NPR1, MYO5, PAP1, VMA1, MCM6, SRS2, SSA1, PSK1, ADE1, CBK1, PHO85, CDC19, TCD1, ERG8, HIS4, GIN4, SPF1, MSH2, TRL1, LCB4, ISW1, HAL5, FBP26, VMA5…	887	651	5914	1.32119	0.101948	0.00510728	0.47782
UP_SEQ_FEATURE	nucleotide phosphate-binding region:ATP	83	9.35738	0.000701	P08566, P40340, P22515, P40341, P53739, Q08965, P06782, P52917, P40348, P33311, P21965, P32485, Q00772, Q01939, P19524, P32492, P18759, Q03786, P43569, P24583, P15700, P07245, Q07478, Q12055, P23293, P07244, P08964, P23291, P24279, P00560, P38323, P38795, P33297, P33298, P33299, P07170, P47044, P30665, P40339, P15454, Q12464, P07277, P36041, P15790, P38691, P22211, Q08220, P40327, Q01852, Q04439,…	ARO1, YTA7, UBA1, YTA12, FPK1, BMS1, SNF1, VPS4, RFC2, MDL2, MCK1, HOG1, SLT2, RPT6, MYO2, MYO4, SEC18, YDR248C, CAF16, PKC1, URA6, ADE3, SUB2, FAP7, SGV1, ADE5,7, MYO1, YCK1, MCM3, PGK1, MCX1, QNS1, RPT5, RPT3, RPT1, ADK1, YJL055W, MCM4, RFC4, GUK1, RVB2, ERG12, EAP1, CKA1, KSP1, NPR1, GSH2, RPT2, TIM44, MYO5, PBS2, VMA1, MCM6, RFC5, SRS2, PSK1, PIM1, MCM2, CBK1, CKA2, PHO85, CMK1, YPK1, ERG8, C…	887	390	5872	1.40889	0.725275	0.193725	1.18724
INTERPRO	IPR027417:P-loop containing nucleoside triphosphate hydrolase	75	8.45547	0.00342262	P32386, P08566, P40340, P40341, Q08965, P06781, P52917, P11076, P40348, P33311, P06780, Q01939, P19524, P32492, P18759, Q03786, P43569, P15700, P07245, P01123, Q07478, Q12055, P08964, P25342, P24279, P38323, P32916, P33297, P33298, P33299, P07170, P54861, P30665, P40339, P15454, Q12464, P21576, P20606, P40327, Q04439, P17255, P53091, P38251, P12954, P36775, P53893, P29469, P38555, P80210, P07560,…	YBT1, ARO1, YTA7, YTA12, BMS1, RHO2, VPS4, ARF1, RFC2, MDL2, RHO1, RPT6, MYO2, MYO4, SEC18, YDR248C, CAF16, URA6, ADE3, YPT1, SUB2, FAP7, MYO1, CDC10, MCM3, MCX1, SRP101, RPT5, RPT3, RPT1, ADK1, DNM1, MCM4, RFC4, GUK1, RVB2, VPS1, SAR1, RPT2, MYO5, VMA1, MCM6, RFC5, SRS2, PIM1, RIA1, MCM2, YPT31, ADE12, SEC4, CDC48, CDC12, YME1, SHS1, RPT4, RHO3, CHD1, MSH2, TRL1, ISW1, SEY1, YPT32, URA8, GET3, S…	849	329	5053	1.35677	0.994872	0.482697	5.55362
GOTERM_MF_DIRECT	GO:0005524~ATP binding	130	14.6561	0.0151222	P32386, P08566, P40340, P40341, Q08965, P06782, P05030, P36010, P40348, P21965, P32485, P37297, Q00772, Q01939, P19524, P32492, Q03434, P13587, P13586, P18759, P04803, Q03786, P24583, P07245, Q07478, P07244, P08964, P00560, P32377, P33297, P33298, P33299, P07170, P30665, P40339, P15454, P06104, P38691, P36101, P22211, Q04439, P29468, P17255, P53091, P12954, P10591, P31374, P27616, P53894, P17157,…	YBT1, ARO1, YTA7, YTA12, BMS1, SNF1, PMA1, YNK1, RFC2, MCK1, HOG1, STT4, SLT2, RPT6, MYO2, MYO4, TY1B-ML2;TY1B-JR1, ENA1, PMR1, SEC18, MSW1, YDR248C, PKC1, ADE3, SUB2, ADE5,7, MYO1, PGK1, MVD1, RPT5, RPT3, RPT1, ADK1, MCM4, RFC4, GUK1, RAD6, KSP1, TCD2, NPR1, MYO5, PAP1, VMA1, MCM6, SRS2, SSA1, PSK1, ADE1, CBK1, PHO85, CDC19, TCD1, ERG8, HIS4, GIN4, SPF1, MSH2, TRL1, LCB4, ISW1, HAL5, FBP26, VMA5…	798	668	4885	1.19132	0.999995	0.355429	20.877
Annotation Cluster 11	Enrichment Score: 3.206962064514106
Category	Term	Count	%	PValue	Genes/Uniprot	Gene Names	List Total	Pop Hits	Pop Total	Fold Enrichment	Bonferroni	Benjamini	FDR
GOTERM_CC_DIRECT	GO:0031595~nuclear proteasome complex	7	0.789177	6.58e-05	P40327, P33297, P33298, P33299, P53549, Q12250, Q01939	RPT2, RPT5, RPT3, RPT1, RPT4, RPN5, RPT6	874	7	5861	6.70595	0.0298028	0.00274676	0.0935624
GOTERM_CC_DIRECT	GO:0008540~proteasome regulatory particle, base subcomplex	9	1.01466	6.65e-05	P40327, P38764, P32565, P33297, P33298, P33299, P53549, P38886, Q01939	RPT2, RPN1, RPN2, RPT5, RPT3, RPT1, RPT4, RPN10, RPT6	874	12	5861	5.02946	0.0301465	0.00254761	0.0946575
GOTERM_BP_DIRECT	GO:0045899~positive regulation of RNA polymerase II transcriptional preinitiation complex assembly	9	1.01466	8.45e-05	P40327, P32558, Q04636, P33297, P33298, P33299, P53549, P53165, Q01939	RPT2, SPT16, POB3, RPT5, RPT3, RPT1, RPT4, SGF73, RPT6	856	12	5557	4.86887	0.117668	0.00779364	0.140132
INTERPRO	IPR003960:ATPase, AAA-type, conserved site	12	1.35287	0.000192	P40327, P40340, P18759, P40341, P25694, P33297, P33298, P52917, P32795, P33299, P53549, Q01939	RPT2, YTA7, SEC18, YTA12, CDC48, RPT5, RPT3, VPS4, YME1, RPT1, RPT4, RPT6	849	21	5053	3.40098	0.256229	0.137578	0.320253
GOTERM_BP_DIRECT	GO:1901800~positive regulation of proteasomal protein catabolic process	6	0.676437	0.000447	P40327, P33297, P33298, P33299, P53549, Q01939	RPT2, RPT5, RPT3, RPT1, RPT4, RPT6	856	6	5557	6.49182	0.484175	0.0310316	0.738798
GOTERM_MF_DIRECT	GO:0036402~proteasome-activating ATPase activity	6	0.676437	0.000594	P40327, P33297, P33298, P33299, P53549, Q01939	RPT2, RPT5, RPT3, RPT1, RPT4, RPT6	798	6	4885	6.12155	0.380672	0.0467824	0.908234
INTERPRO	IPR005937:26S proteasome subunit P45	6	0.676437	0.000681	P40327, P33297, P33298, P33299, P53549, Q01939	RPT2, RPT5, RPT3, RPT1, RPT4, RPT6	849	6	5053	5.95171	0.649173	0.294715	1.1286
GOTERM_CC_DIRECT	GO:0031597~cytosolic proteasome complex	5	0.563698	0.00215636	P40327, P33297, P33298, P33299, P53549	RPT2, RPT5, RPT3, RPT1, RPT4	874	5	5861	6.70595	0.629536	0.0374721	3.02543
GOTERM_BP_DIRECT	GO:0030163~protein catabolic process	10	1.1274	0.00236995	P40327, P40354, P38323, Q10740, P33297, P33298, P33299, P36775, P53549, Q01939	RPT2, NTA1, MCX1, LAP2, RPT5, RPT3, RPT1, PIM1, RPT4, RPT6	856	21	5557	3.09134	0.970224	0.107168	3.85988
GOTERM_MF_DIRECT	GO:0017025~TBP-class protein binding	9	1.01466	0.00458708	P40327, P32774, P33297, P33298, P29055, P33299, P53549, Q03761, Q01939	RPT2, TOA2, RPT5, RPT3, SUA7, RPT1, RPT4, TAF12, RPT6	798	18	4885	3.06078	0.97553	0.186271	6.82164
GOTERM_BP_DIRECT	GO:0070682~proteasome regulatory particle assembly	6	0.676437	0.017551	P40327, P33297, P33298, P33299, P53549, Q01939	RPT2, RPT5, RPT3, RPT1, RPT4, RPT6	856	11	5557	3.54099	1	0.373923	25.4538
Annotation Cluster 12	Enrichment Score: 3.1500438566704303
Category	Term	Count	%	PValue	Genes/Uniprot	Gene Names	List Total	Pop Hits	Pop Total	Fold Enrichment	Bonferroni	Benjamini	FDR
GOTERM_BP_DIRECT	GO:0006368~transcription elongation from RNA polymerase II promoter	21	2.36753	7.75e-05	P32832, P04786, P32657, P32558, P35189, Q06697, Q12406, Q06168, P32597, P38439, P41895, P53330, P31384, Q07979, Q06488, Q07478, P43609, P38351, P17629, Q9URQ5, P41896	NPL6, TOP1, CHD1, SPT16, TAF14, CDC73, ARP7, SFH1, STH1, LEO1, TFG1, RTT102, CCR4, RSC58, RSC2, SUB2, RSC8, PAF1, HPR1, HTL1, TFG2	856	54	5557	2.5246	0.108418	0.00762134	0.128466
GOTERM_BP_DIRECT	GO:0006337~nucleosome disassembly	11	1.24014	0.000299	P32832, P32597, P25632, P25293, P53330, Q07979, Q12406, Q06488, P43609, Q9URQ5, Q06168	NPL6, STH1, RSC6, NAP1, RTT102, RSC58, ARP7, RSC2, RSC8, HTL1, SFH1	856	20	5557	3.5705	0.357391	0.0230059	0.494137
GOTERM_CC_DIRECT	GO:0016586~RSC complex	10	1.1274	0.000782	P32832, P32597, P25632, P53330, Q07979, Q12406, Q06488, P43609, Q9URQ5, Q06168	NPL6, STH1, RSC6, RTT102, RSC58, ARP7, RSC2, RSC8, HTL1, SFH1	874	19	5861	3.52945	0.302067	0.01875	1.10646
GOTERM_BP_DIRECT	GO:0043044~ATP-dependent chromatin remodeling	11	1.24014	0.00176337	P32832, P32597, P25632, P32657, P38144, P32591, Q07979, Q12406, Q06488, P43609, Q06168	NPL6, STH1, RSC6, CHD1, ISW1, SWI3, RSC58, ARP7, RSC2, RSC8, SFH1	856	24	5557	2.97542	0.926748	0.0861903	2.88552
GOTERM_MF_DIRECT	GO:0015616~DNA translocase activity	12	1.35287	0.00557543	P32832, P32597, P25632, P53330, P32591, Q07979, P35189, Q12406, Q06488, P43609, Q9URQ5, Q06168	NPL6, STH1, RSC6, RTT102, SWI3, RSC58, TAF14, ARP7, RSC2, RSC8, HTL1, SFH1	798	30	4885	2.44862	0.989023	0.201961	8.23331
Annotation Cluster 13	Enrichment Score: 2.9436430094827792
Category	Term	Count	%	PValue	Genes/Uniprot	Gene Names	List Total	Pop Hits	Pop Total	Fold Enrichment	Bonferroni	Benjamini	FDR
UP_KEYWORDS	Endoplasmic reticulum	83	9.35738	0.000286	P47133, P33767, P42934, P38272, P40345, P39107, P53073, P39719, Q02201, P15303, Q03337, P40533, P25385, Q06144, P25386, P40006, P01123, P48415, P28321, P38875, Q03579, P53723, Q06833, P38688, P14906, P32916, P32915, P32476, P46971, P16603, Q02159, Q04080, P32629, Q02774, P40548, P38694, Q04491, Q08986, Q12063, P40540, P20606, P40482, P53192, P39543, P38349, P40075, P52870, P47154, Q04697, P43636,…	EMC2, WBP1, PMT6, SHE3, LRO1, MNN9, EMC4, FLC2, OSH6, SEC23, TRS31, TED1, BOS1, ORM2, USO1, IRC22, YPT1, SEC16, YJU3, GPI16, LIP1, YNR021W, YPR091C, SRP72, SEC63, SRP101, SEC61, ERG1, PMT4, NCP1, UBC7, GPI17, ANP1, SHR3, SNL1, MSC7, SEC13, SAM3, NUS1, EMC5, SAR1, SEC24, GET1, SOP4, UBX7, SCS2, SBH1, STE24, GSF2, ALG2, CPR5, MPD1, SPC1, NTE1, EMP24, FEN1, HMG1, HMG2, SEC11, CWH43, CDC48, OSH7, SPF…	887	382	5914	1.44868	0.082263	0.00475778	0.38165
GOTERM_CC_DIRECT	GO:0005789~endoplasmic reticulum membrane	79	8.90643	0.000462	P33767, P23724, P42934, P38272, P40345, P39107, P53073, P39719, P30657, Q02201, P15303, P40533, P25385, Q06144, P25386, P40006, P01123, P48415, P20081, P38875, Q03579, P53723, Q06833, P38688, P14906, P32916, P32915, P32476, P46971, P16603, Q02159, Q04080, P32629, Q02774, P40548, Q04491, Q12063, P40540, P20606, P40482, P53192, P39543, P40075, P52870, P47154, Q04697, P43636, P46965, Q04958, P32803,…	WBP1, PRE7, PMT6, SHE3, LRO1, MNN9, EMC4, FLC2, PRE4, OSH6, SEC23, TED1, BOS1, ORM2, USO1, IRC22, YPT1, SEC16, FPR1, GPI16, LIP1, YNR021W, YPR091C, SRP72, SEC63, SRP101, SEC61, ERG1, PMT4, NCP1, UBC7, GPI17, ANP1, SHR3, SNL1, SEC13, NUS1, EMC5, SAR1, SEC24, GET1, SOP4, SCS2, SBH1, STE24, GSF2, ALG2, SPC1, NTE1, EMP24, FEN1, HMG1, SEC4, HMG2, SEC11, CWH43, FPR3, CDC48, OSH7, SPF1, CYR1, SWA2, ERV4…	874	367	5861	1.44352	0.191386	0.0150593	0.655073
GOTERM_CC_DIRECT	GO:0005783~endoplasmic reticulum	116	13.0778	0.0111732	P32386, P47133, P38272, P40345, P39107, P06780, P39719, P39105, P40533, P42838, P25385, Q06144, P25386, P38934, P01123, P38875, Q03579, P38688, P14906, P32916, P32915, P32476, P38264, P16603, P36081, Q04080, P32629, Q08193, Q02774, P40548, P21375, P38694, P40540, P39543, P38349, P47154, Q04697, P35176, P25358, P32803, P07560, P15367, P33333, P38755, P39986, Q12451, P39727, P41543, P40350, Q12246,…	YBT1, EMC2, SHE3, LRO1, MNN9, RHO1, FLC2, PLB1, TED1, LEM3, BOS1, ORM2, USO1, BFR1, YPT1, GPI16, LIP1, SRP72, SEC63, SRP101, SEC61, ERG1, PHO88, NCP1, YKL077W, GPI17, ANP1, GAS5, SHR3, SNL1, OSM1, MSC7, EMC5, SOP4, UBX7, STE24, GSF2, CPR5, FEN1, EMP24, SEC4, SEC11, SLC1, OSH7, SPF1, OSH2, ERV46, OST1, ALG5, LCB4, SEC66, CHO1, VTC1, UBP15, IFA38, PIS1, YPT52, EMP47, RPN1, FAR8, DJP1, WBP1, PMT6, V…	874	636	5861	1.2231	0.994307	0.153571	14.7777
Annotation Cluster 14	Enrichment Score: 2.6729888463994813
Category	Term	Count	%	PValue	Genes/Uniprot	Gene Names	List Total	Pop Hits	Pop Total	Fold Enrichment	Bonferroni	Benjamini	FDR
INTERPRO	IPR003959:ATPase, AAA-type, core	18	2.02931	7.69e-06	P40327, P40340, P38323, P40341, Q08965, P33297, P52917, P33298, P40348, P33299, P36775, P40339, Q01939, P18759, P25694, P38630, P32795, P53549	RPT2, YTA7, MCX1, YTA12, BMS1, RPT5, VPS4, RPT3, RFC2, RPT1, PIM1, RFC4, RPT6, SEC18, CDC48, RFC1, YME1, RPT4	849	34	5053	3.1509	0.0117599	0.0117599	0.0128177
INTERPRO	IPR003960:ATPase, AAA-type, conserved site	12	1.35287	0.000192	P40327, P40340, P18759, P40341, P25694, P33297, P33298, P52917, P32795, P33299, P53549, Q01939	RPT2, YTA7, SEC18, YTA12, CDC48, RPT5, RPT3, VPS4, YME1, RPT1, RPT4, RPT6	849	21	5053	3.40098	0.256229	0.137578	0.320253
INTERPRO	IPR003593:AAA+ ATPase domain	24	2.70575	0.00807727	P40327, P32386, P24279, P40340, P38323, P38251, P40341, P32916, P33297, P52917, P33298, P33311, P40348, P33299, P36775, P40339, Q01939, Q12464, P18759, P25694, P43569, P38630, P32795, P53549	RPT2, YBT1, MCM3, YTA7, MCX1, RFC5, YTA12, SRP101, RPT5, VPS4, RPT3, MDL2, RFC2, RPT1, PIM1, RFC4, RPT6, RVB2, SEC18, CDC48, CAF16, RFC1, YME1, RPT4	849	83	5053	1.72098	0.999996	0.646347	12.6423
SMART	SM00382:AAA	24	2.70575	0.029141	P40327, P32386, P24279, P40340, P38323, P38251, P40341, P32916, P33297, P52917, P33298, P33311, P40348, P33299, P36775, P40339, Q01939, Q12464, P18759, P25694, P43569, P38630, P32795, P53549	RPT2, YBT1, MCM3, YTA7, MCX1, RFC5, YTA12, SRP101, RPT5, VPS4, RPT3, MDL2, RFC2, RPT1, PIM1, RFC4, RPT6, RVB2, SEC18, CDC48, CAF16, RFC1, YME1, RPT4	341	82	1776	1.52435	0.998673	0.963567	31.4462
GOTERM_MF_DIRECT	GO:0016887~ATPase activity	27	3.04397	0.123865	P32386, P40327, P21306, P40340, P40341, P05030, P10591, P52917, P33311, P36775, Q01939, P18759, P43569, P25694, Q12072, P39986, P53549, Q12055, P24279, P25847, P38144, P33297, P33298, P33299, Q12154, P32597, Q12349	YBT1, RPT2, ATP15, YTA7, YTA12, PMA1, SSA1, VPS4, MDL2, PIM1, RPT6, SEC18, CAF16, CDC48, IOC2, SPF1, RPT4, FAP7, MCM3, MSH2, ISW1, RPT5, RPT3, RPT1, GET3, STH1, ATP14	798	127	4885	1.30143	1	0.861402	86.8944
Annotation Cluster 15	Enrichment Score: 2.6602683942929035
Category	Term	Count	%	PValue	Genes/Uniprot	Gene Names	List Total	Pop Hits	Pop Total	Fold Enrichment	Bonferroni	Benjamini	FDR
UP_SEQ_FEATURE	nucleotide phosphate-binding region:GTP	30	3.38219	1.9e-05	P06781, P06780, P11076, P53893, P80210, P38555, P07560, P32468, P01123, Q07657, P38066, P25342, Q00245, P09734, P09733, P32916, Q99287, P51996, P02557, P54861, P02992, P36017, Q08726, P32457, P36018, P01119, P21576, P20606, P19073, P32769	RHO2, RHO1, ARF1, RIA1, ADE12, YPT31, SEC4, CDC12, YPT1, SHS1, RIB1, CDC10, RHO3, TUB3, TUB1, SRP101, SEY1, YPT32, TUB2, DNM1, TUF1, VPS21, YOR262W, CDC3, YPT52, RAS1, VPS1, SAR1, CDC42, HBS1	887	88	5872	2.25684	0.0344714	0.0344714	0.0324233
UP_KEYWORDS	GTP-binding	31	3.49493	3.79e-05	P06781, P06780, P11076, P53893, P80210, P38555, P07560, P32468, P41940, P01123, Q07657, P38066, P25342, Q00245, P09734, P09733, P32916, Q99287, P51996, P02557, P54861, P02992, P36017, Q08726, P32457, P36018, P01119, P21576, P20606, P19073, P32769	RHO2, RHO1, ARF1, RIA1, ADE12, YPT31, SEC4, CDC12, PSA1, YPT1, SHS1, RIB1, CDC10, RHO3, TUB3, TUB1, SRP101, SEY1, YPT32, TUB2, DNM1, TUF1, VPS21, YOR262W, CDC3, YPT52, RAS1, VPS1, SAR1, CDC42, HBS1	887	96	5914	2.15302	0.0113114	0.000711	0.0506589
UP_SEQ_FEATURE	short sequence motif:Effector region	10	1.1274	0.000164	Q00245, P07560, P36017, P01119, P01123, P06781, P51996, P06780, P19073, P38555	RHO3, SEC4, VPS21, RAS1, YPT1, RHO2, YPT32, RHO1, CDC42, YPT31	887	16	5872	4.13754	0.260184	0.0955709	0.278193
GOTERM_MF_DIRECT	GO:0005525~GTP binding	32	3.60767	0.000308	Q08965, P06781, P06780, P11076, P53893, P80210, P38555, P07560, P32468, P41940, P01123, Q07657, P38066, P25342, Q00245, P09734, P09733, P32916, Q99287, P51996, P02557, P54861, P02992, P36017, Q08726, P32457, P36018, P01119, P21576, P20606, P19073, P32769	BMS1, RHO2, RHO1, ARF1, RIA1, ADE12, YPT31, SEC4, CDC12, PSA1, YPT1, SHS1, RIB1, CDC10, RHO3, TUB3, TUB1, SRP101, SEY1, YPT32, TUB2, DNM1, TUF1, VPS21, YOR262W, CDC3, YPT52, RAS1, VPS1, SAR1, CDC42, HBS1	798	103	4885	1.90184	0.220299	0.0406259	0.472752
GOTERM_MF_DIRECT	GO:0003924~GTPase activity	26	2.93123	0.000624	Q08965, P06781, P11076, P06780, P53893, P38555, P07560, P32468, P01123, P25342, Q00245, P09734, P09733, P51996, Q99287, P02557, P54861, P02992, P36017, Q08726, P36018, P01119, P21576, P32769, P19073, P20606	BMS1, RHO2, ARF1, RHO1, RIA1, YPT31, SEC4, CDC12, YPT1, CDC10, RHO3, TUB3, TUB1, YPT32, SEY1, TUB2, DNM1, TUF1, VPS21, YOR262W, YPT52, RAS1, VPS1, HBS1, CDC42, SAR1	798	80	4885	1.98951	0.395833	0.0447762	0.954992
UP_SEQ_FEATURE	lipid moiety-binding region:S-geranylgeranyl cysteine	9	1.01466	0.00108228	P07560, P36017, P36018, P01123, P06781, P51996, P06780, P19073, P38555	SEC4, VPS21, YPT52, YPT1, RHO2, YPT32, RHO1, CDC42, YPT31	887	16	5872	3.72379	0.863937	0.220677	1.827
UP_KEYWORDS	Prenylation	12	1.35287	0.00207363	P36015, Q00245, P07560, P36017, P36018, P01119, P01123, P06781, P51996, P06780, P19073, P38555	YKT6, RHO3, SEC4, VPS21, YPT52, RAS1, YPT1, RHO2, YPT32, RHO1, CDC42, YPT31	887	29	5914	2.75893	0.463524	0.0236668	2.73575
INTERPRO	IPR001806:Small GTPase superfamily	11	1.24014	0.00676529	Q00245, P07560, P36017, P36018, P01119, P01123, P06781, P51996, P06780, P19073, P38555	RHO3, SEC4, VPS21, YPT52, RAS1, YPT1, RHO2, YPT32, RHO1, CDC42, YPT31	849	26	5053	2.51803	0.999971	0.647969	10.6966
INTERPRO	IPR005225:Small GTP-binding protein domain	15	1.69109	0.0102673	Q00245, P51996, P06781, P06780, P11076, P53893, P38555, P07560, P02992, P36017, P36018, P01119, P01123, P20606, P19073	RHO3, YPT32, RHO2, RHO1, ARF1, RIA1, YPT31, SEC4, TUF1, VPS21, YPT52, RAS1, YPT1, SAR1, CDC42	849	44	5053	2.02899	1	0.678181	15.8017
GOTERM_BP_DIRECT	GO:0007264~small GTPase mediated signal transduction	15	1.69109	0.0132121	Q00245, P51996, P06781, P11433, P06780, P11076, Q06409, P38555, P07560, P36017, P36018, P01119, P39958, P01123, P19073	RHO3, YPT32, RHO2, CDC24, RHO1, ARF1, YLR422W, YPT31, SEC4, VPS21, YPT52, RAS1, GDI1, YPT1, CDC42	856	49	5557	1.98729	1	0.325614	19.8
UP_KEYWORDS	Lipoprotein	23	2.59301	0.368646	P40327, Q00245, Q12246, P51996, P06781, P11076, P06780, P39105, P38555, P39962, P36015, P07560, Q08193, P36017, P39968, P36018, P01119, P26570, P01123, P33328, P22146, P23291, P19073	RPT2, RHO3, LCB4, YPT32, RHO2, ARF1, RHO1, PLB1, YPT31, YCK3, YKT6, SEC4, GAS5, VPS21, VAC8, YPT52, RAS1, PPZ1, YPT1, SNC2, GAS1, YCK1, CDC42	887	135	5914	1.13593	1	0.780437	99.7857
UP_KEYWORDS	Methylation	10	1.1274	0.691338	P36015, Q00245, P36017, P23594, P01119, P23595, P06781, P06780, P32861, P19073	YKT6, RHO3, VPS21, PPH21, RAS1, PPH22, RHO2, RHO1, UGP1, CDC42	887	67	5914	0.995137	1	0.944457	100
Annotation Cluster 16	Enrichment Score: 2.5828014663360586
Category	Term	Count	%	PValue	Genes/Uniprot	Gene Names	List Total	Pop Hits	Pop Total	Fold Enrichment	Bonferroni	Benjamini	FDR
KEGG_PATHWAY	sce01230:Biosynthesis of amino acids	39	4.39684	0.000229	P23542, P06208, P00925, P52893, P00937, P08566, P31373, P04076, P00931, P40510, P00950, P00549, P18544, P32327, P31116, P33330, P00815, P47176, Q04728, Q01217, P38063, P00358, P38999, P00560, P00359, P38998, P16861, P16862, P00942, P40495, P54885, P15019, P07172, P33734, P53206, P32263, Q12040, Q01802, P05150	AAT2, LEU4, ENO2, ALT1, TRP3, ARO1, CYS3, ARG4, TRP5, SER33, GPM1, CDC19, ARG8, PYC2, HOM6, SER1, HIS4, BAT2, ARG7, ARG5,6, PRS4, TDH2, LYS9, PGK1, TDH3, LYS1, PFK1, PFK2, TPI1, LYS12, PRO2, TAL1, HIS5, HIS7, YGR012W, PRO3, YOR283W, AAT1, ARG3	395	123	2194	1.76116	0.0219769	0.00369681	0.252499
UP_KEYWORDS	Amino-acid biosynthesis	25	2.81849	0.00751221	P06208, P00937, P08566, P38999, P38998, P31373, P20049, P04076, P40495, P54885, P00931, P40510, P07172, P33734, P18544, P32626, P31116, P33330, P00815, P32263, P07245, P47176, Q04728, Q01217, P05150	LEU4, TRP3, ARO1, LYS9, LYS1, CYS3, TYR1, ARG4, LYS12, PRO2, TRP5, SER33, HIS5, HIS7, ARG8, UTR4, HOM6, SER1, HIS4, PRO3, ADE3, BAT2, ARG7, ARG5,6, ARG3	887	97	5914	1.71841	0.895876	0.0563542	9.58543
GOTERM_BP_DIRECT	GO:0008652~cellular amino acid biosynthetic process	25	2.81849	0.0103721	P06208, P00937, P08566, P38999, P38998, P31373, P20049, P04076, P40495, P54885, P00931, P40510, P07172, P33734, P18544, P32626, P31116, P33330, P00815, P32263, P07245, P47176, Q04728, Q01217, P05150	LEU4, TRP3, ARO1, LYS9, LYS1, CYS3, TYR1, ARG4, LYS12, PRO2, TRP5, SER33, HIS5, HIS7, ARG8, UTR4, HOM6, SER1, HIS4, PRO3, ADE3, BAT2, ARG7, ARG5,6, ARG3	856	97	5557	1.67315	1	0.295973	15.8836
Annotation Cluster 17	Enrichment Score: 2.4536304448544053
Category	Term	Count	%	PValue	Genes/Uniprot	Gene Names	List Total	Pop Hits	Pop Total	Fold Enrichment	Bonferroni	Benjamini	FDR
UP_KEYWORDS	Glycolysis	12	1.35287	0.000712	P00549, P00925, P00358, P00560, P00359, P16861, P16862, P16387, P00942, P00950, P32473, P12709	CDC19, ENO2, TDH2, PGK1, TDH3, PFK1, PFK2, PDA1, TPI1, GPM1, PDB1, PGI1	887	26	5914	3.07727	0.192276	0.00885781	0.946646
GOTERM_BP_DIRECT	GO:0006096~glycolytic process	12	1.35287	0.000895	P00549, P00925, P00358, P00560, P00359, P16861, P16862, P16387, P00942, P00950, P32473, P12709	CDC19, ENO2, TDH2, PGK1, TDH3, PFK1, PFK2, PDA1, TPI1, GPM1, PDB1, PGI1	856	26	5557	2.99623	0.734524	0.0560313	1.47463
KEGG_PATHWAY	sce01200:Carbon metabolism	34	3.83315	0.00209724	P23542, P00925, P52893, P20967, P00950, P40510, P09624, P00549, P32327, Q03786, P33330, P16387, P19262, P38858, P38063, P41338, Q00711, P37262, P49095, P00358, P00359, P00560, P16861, P16862, P00942, P15019, P32473, P11412, P53206, P32419, P12695, Q01802, Q12040, P12709	AAT2, ENO2, ALT1, KGD1, GPM1, SER33, LPD1, CDC19, PYC2, YDR248C, SER1, PDA1, KGD2, SOL3, PRS4, ERG10, SDH1, SOL2, GCV2, TDH2, TDH3, PGK1, PFK1, PFK2, TPI1, TAL1, PDB1, ZWF1, YGR012W, MDH3, LAT1, AAT1, YOR283W, PGI1	395	114	2194	1.65658	0.184249	0.0286731	2.29023
GOTERM_BP_DIRECT	GO:0006094~gluconeogenesis	8	0.901917	0.0184654	P00925, P00358, P00560, P00359, P32327, P00942, P00950, P12709	ENO2, TDH2, PGK1, TDH3, PYC2, TPI1, GPM1, PGI1	856	19	5557	2.7334	1	0.383847	26.5965
KEGG_PATHWAY	sce00010:Glycolysis / Gluconeogenesis	18	2.02931	0.0218665	P00925, P00358, P00359, P00560, P16861, P16862, P00942, P00950, P32473, P09624, Q03161, P06169, P00549, Q03262, P16387, P12695, Q12040, P12709	ENO2, TDH2, TDH3, PGK1, PFK1, PFK2, TPI1, GPM1, PDB1, LPD1, YMR099C, PDC1, CDC19, PGM3, PDA1, LAT1, YOR283W, PGI1	395	58	2194	1.72379	0.882884	0.125442	21.6504
Annotation Cluster 18	Enrichment Score: 2.396101209859962
Category	Term	Count	%	PValue	Genes/Uniprot	Gene Names	List Total	Pop Hits	Pop Total	Fold Enrichment	Bonferroni	Benjamini	FDR
GOTERM_BP_DIRECT	GO:0006696~ergosterol biosynthetic process	11	1.24014	0.00176337	P12683, P12684, P08524, P07277, P24521, P32476, P25087, P16603, P25340, P53199, P41338	HMG1, HMG2, ERG20, ERG12, ERG8, ERG1, ERG6, NCP1, ERG4, ERG26, ERG10	856	24	5557	2.97542	0.926748	0.0861903	2.88552
GOTERM_BP_DIRECT	GO:0006694~steroid biosynthetic process	11	1.24014	0.00253991	P12683, P12684, P32377, P35844, P07277, P24521, P25087, P16603, P25340, P53199, Q12068	HMG1, HMG2, MVD1, KES1, ERG12, ERG8, ERG6, NCP1, ERG4, ERG26, GRE2	856	25	5557	2.8564	0.976865	0.107861	4.13124
UP_KEYWORDS	Sterol biosynthesis	10	1.1274	0.00288159	P12683, P12684, P32377, P35844, P07277, P24521, P25087, P16603, P25340, P53199	HMG1, HMG2, MVD1, KES1, ERG12, ERG8, ERG6, NCP1, ERG4, ERG26	887	22	5914	3.03064	0.579253	0.0294114	3.78282
UP_KEYWORDS	Sterol metabolism	10	1.1274	0.00288159	P12683, P12684, P32377, P35844, P07277, P24521, P25087, P16603, P25340, P53199	HMG1, HMG2, MVD1, KES1, ERG12, ERG8, ERG6, NCP1, ERG4, ERG26	887	22	5914	3.03064	0.579253	0.0294114	3.78282
UP_KEYWORDS	Steroid metabolism	10	1.1274	0.00288159	P12683, P12684, P32377, P35844, P07277, P24521, P25087, P16603, P25340, P53199	HMG1, HMG2, MVD1, KES1, ERG12, ERG8, ERG6, NCP1, ERG4, ERG26	887	22	5914	3.03064	0.579253	0.0294114	3.78282
KEGG_PATHWAY	sce00900:Terpenoid backbone biosynthesis	10	1.1274	0.00300111	P12683, P12684, P08524, P32377, P07277, P24521, P47154, P18900, Q12063, P41338	HMG1, HMG2, ERG20, MVD1, ERG12, ERG8, STE24, COQ1, NUS1, ERG10	395	19	2194	2.92338	0.252892	0.0318749	3.26249
GOTERM_BP_DIRECT	GO:0016126~sterol biosynthetic process	11	1.24014	0.00489996	P12683, P12684, P32377, P35844, P07277, P24521, P25087, P53844, P16603, P25340, P53199	HMG1, HMG2, MVD1, KES1, ERG12, ERG8, ERG6, PDR17, NCP1, ERG4, ERG26	856	27	5557	2.64482	0.999307	0.182966	7.8257
GOTERM_BP_DIRECT	GO:0008202~steroid metabolic process	10	1.1274	0.00493756	P12683, P12684, P32377, P35844, P07277, P24521, P25087, P16603, P25340, P53199	HMG1, HMG2, MVD1, KES1, ERG12, ERG8, ERG6, NCP1, ERG4, ERG26	856	23	5557	2.82253	0.999345	0.179733	7.88347
GOTERM_BP_DIRECT	GO:0008299~isoprenoid biosynthetic process	7	0.789177	0.00523415	P12683, P12684, P08524, P32377, P07277, P24521, P18900	HMG1, HMG2, ERG20, MVD1, ERG12, ERG8, COQ1	856	12	5557	3.7869	0.999579	0.18497	8.33791
UP_KEYWORDS	Steroid biosynthesis	10	1.1274	0.00572422	P12683, P12684, P32377, P35844, P07277, P24521, P25087, P16603, P25340, P53199	HMG1, HMG2, MVD1, KES1, ERG12, ERG8, ERG6, NCP1, ERG4, ERG26	887	24	5914	2.77809	0.821327	0.0467126	7.3844
UP_KEYWORDS	Lipid biosynthesis	22	2.48027	0.00589001	P32377, P39006, P16603, P08456, P38286, P06197, P25358, P12683, P12684, P38071, P32463, P08524, P20485, P35844, P07277, P24521, P33333, P25087, P53199, P25340, P39525, Q03579	MVD1, PSD1, NCP1, CHO1, IFA38, PIS1, FEN1, HMG1, HMG2, ETR1, ACP1, ERG20, CKI1, KES1, ERG12, ERG8, SLC1, ERG6, ERG26, ERG4, CEM1, LIP1	887	80	5914	1.83354	0.830046	0.046769	7.59056
GOTERM_BP_DIRECT	GO:0019287~isopentenyl diphosphate biosynthetic process, mevalonate pathway	4	0.450958	0.0128548	P12683, P32377, P07277, P24521	HMG1, MVD1, ERG12, ERG8	856	4	5557	6.49182	1	0.32914	19.3168
Annotation Cluster 19	Enrichment Score: 2.2502960872618165
Category	Term	Count	%	PValue	Genes/Uniprot	Gene Names	List Total	Pop Hits	Pop Total	Fold Enrichment	Bonferroni	Benjamini	FDR
UP_KEYWORDS	Translocation	28	3.15671	2.03e-06	Q01852, Q02630, P48837, P52870, P39685, P53299, Q03790, P40477, Q06142, P57744, P40066, P14907, P39705, P32915, Q02629, P53112, P34077, P53011, P32499, P47045, P36046, Q02776, Q02774, P49334, Q04491, P38217, Q02199, P53220	TIM44, NUP116, NUP57, SBH1, POM152, TIM13, NUP53, NUP159, KAP95, TIM8, GLE2, NSP1, NUP60, SEC61, NUP100, PEX14, NIC96, SEH1, NUP2, TIM54, MIA40, TIM50, SHR3, TOM22, SEC13, KAP104, NUP49, TIM21	887	72	5914	2.59288	0.000608	5.53e-05	0.00270732
UP_KEYWORDS	mRNA transport	25	2.81849	1.02e-05	Q08920, Q02630, P48837, P39685, P38272, Q99257, Q03790, P32492, P40477, Q06142, Q07478, Q02455, P40066, P14907, P39705, Q03280, Q02629, P34077, P53011, P32499, P38199, Q04491, P38217, Q02199, P34160	CBC2, NUP116, NUP57, POM152, SHE3, MEX67, NUP53, MYO4, NUP159, KAP95, SUB2, MLP1, GLE2, NSP1, NUP60, TOM1, NUP100, NIC96, SEH1, NUP2, HEK2, SEC13, KAP104, NUP49, STO1	887	65	5914	2.56439	0.00305902	0.000219	0.0136459
GOTERM_BP_DIRECT	GO:0051028~mRNA transport	25	2.81849	1.61e-05	Q08920, Q02630, P48837, P39685, P38272, Q99257, Q03790, P32492, P40477, Q06142, Q07478, Q02455, P40066, P14907, P39705, Q03280, Q02629, P34077, P53011, P32499, P38199, Q04491, P38217, Q02199, P34160	CBC2, NUP116, NUP57, POM152, SHE3, MEX67, NUP53, MYO4, NUP159, KAP95, SUB2, MLP1, GLE2, NSP1, NUP60, TOM1, NUP100, NIC96, SEH1, NUP2, HEK2, SEC13, KAP104, NUP49, STO1	856	65	5557	2.49685	0.0235712	0.0023825	0.0267164
GOTERM_BP_DIRECT	GO:0006606~protein import into nucleus	19	2.14205	2.61e-05	Q02630, P33307, P25293, P48837, P40066, P14907, P39685, Q12363, Q02821, P11745, Q02629, P34077, Q03790, P32337, P41920, Q06142, P38217, Q02199, Q02455	NUP116, CSE1, NAP1, NUP57, GLE2, NSP1, POM152, WTM1, SRP1, RNA1, NUP100, NIC96, NUP53, PSE1, YRB1, KAP95, KAP104, NUP49, MLP1	856	43	5557	2.86848	0.0379006	0.00350634	0.0432713
GOTERM_BP_DIRECT	GO:0006607~NLS-bearing protein import into nucleus	11	1.24014	4.89e-05	P48837, P32337, P14907, P40477, Q06142, Q02821, P39705, P38217, Q02629, P32499, Q03790	NUP57, PSE1, NSP1, NUP159, KAP95, SRP1, NUP60, KAP104, NUP100, NUP2, NUP53	856	17	5557	4.20059	0.0698681	0.00555596	0.0810998
GOTERM_BP_DIRECT	GO:0016973~poly(A)+ mRNA export from nucleus	14	1.57835	0.000152	Q02630, P40066, P14907, P39705, P34077, Q99257, P32499, P23615, P40457, Q06505, P40477, P38922, Q02199, Q02455	NUP116, GLE2, NSP1, NUP60, NIC96, MEX67, NUP2, SPT6, MLP2, SPN1, NUP159, HRB1, NUP49, MLP1	856	29	5557	3.13398	0.201122	0.0131218	0.251215
UP_KEYWORDS	Nuclear pore complex	16	1.80383	0.000527	Q02630, P48837, P40066, P14907, P39685, P39705, Q02629, P34077, P53011, P32499, Q03790, P40477, Q06142, P38217, Q02199, Q04491	NUP116, NUP57, GLE2, NSP1, POM152, NUP60, NUP100, NIC96, SEH1, NUP2, NUP53, NUP159, KAP95, KAP104, NUP49, SEC13	887	41	5914	2.60192	0.146379	0.00716818	0.7025
GOTERM_MF_DIRECT	GO:0005487~nucleocytoplasmic transporter activity	10	1.1274	0.000549	Q02630, P48837, P14907, P40477, P39705, Q02199, Q02629, Q02455, P32499, Q03790	NUP116, NUP57, NSP1, NUP159, NUP60, NUP49, NUP100, MLP1, NUP2, NUP53	798	17	4885	3.60091	0.358228	0.0539315	0.841038
GOTERM_CC_DIRECT	GO:0044615~nuclear pore nuclear basket	7	0.789177	0.000602	P40457, P14907, P39705, P34077, Q02455, P32499, Q03790	MLP2, NSP1, NUP60, NIC96, MLP1, NUP2, NUP53	874	9	5861	5.21574	0.242083	0.0171746	0.853878
GOTERM_CC_DIRECT	GO:0044613~nuclear pore central transport channel	8	0.901917	0.000633	Q02630, P48837, P14907, P40477, P39705, Q02199, Q02629, Q03790	NUP116, NUP57, NSP1, NUP159, NUP60, NUP49, NUP100, NUP53	874	12	5861	4.47063	0.252768	0.0169939	0.897421
GOTERM_CC_DIRECT	GO:0031965~nuclear membrane	23	2.59301	0.000796	Q02630, P48837, P40075, P40066, P14907, P39685, P14906, P39705, P06782, Q02629, P34077, P53011, P32499, P39962, Q03790, P32337, P40548, P40477, Q06142, P38217, Q02199, Q12063, P19073	NUP116, NUP57, SCS2, GLE2, NSP1, POM152, SEC63, NUP60, SNF1, NUP100, NIC96, SEH1, NUP2, YCK3, NUP53, PSE1, SNL1, NUP159, KAP95, KAP104, NUP49, NUS1, CDC42	874	74	5861	2.08428	0.306842	0.018158	1.12747
GOTERM_CC_DIRECT	GO:0005643~nuclear pore	19	2.14205	0.00207763	Q02630, P48837, P40066, P14907, P39685, Q02821, P39705, Q02629, P34077, P53011, P40517, Q99257, P32499, Q03790, P40477, Q06142, P38217, Q02199, Q04491	NUP116, NUP57, GLE2, NSP1, POM152, SRP1, NUP60, NUP100, NIC96, SEH1, YRB2, MEX67, NUP2, NUP53, NUP159, KAP95, KAP104, NUP49, SEC13	874	60	5861	2.12355	0.615843	0.0375452	2.91648
UP_SEQ_FEATURE	repeat:FG 1	7	0.789177	0.0027122	Q02630, P48837, P14907, P40477, Q02199, Q02629, Q03790	NUP116, NUP57, NSP1, NUP159, NUP49, NUP100, NUP53	887	11	5872	4.21277	0.99328	0.393631	4.5193
UP_SEQ_FEATURE	repeat:FG 2	7	0.789177	0.0027122	Q02630, P48837, P14907, P40477, Q02199, Q02629, Q03790	NUP116, NUP57, NSP1, NUP159, NUP49, NUP100, NUP53	887	11	5872	4.21277	0.99328	0.393631	4.5193
UP_SEQ_FEATURE	repeat:FG 3	7	0.789177	0.0027122	Q02630, P48837, P14907, P40477, Q02199, Q02629, Q03790	NUP116, NUP57, NSP1, NUP159, NUP49, NUP100, NUP53	887	11	5872	4.21277	0.99328	0.393631	4.5193
UP_SEQ_FEATURE	repeat:FG 4	6	0.676437	0.00290952	Q02630, P48837, P14907, Q02199, Q02629, Q03790	NUP116, NUP57, NSP1, NUP49, NUP100, NUP53	887	8	5872	4.96505	0.995333	0.3861	4.84047
UP_SEQ_FEATURE	compositionally biased region:Gly-rich	6	0.676437	0.0100622	Q02630, P35191, P48837, P25294, Q02199, Q02629	NUP116, MDJ1, NUP57, SIS1, NUP49, NUP100	887	10	5872	3.97204	1	0.665726	15.8195
GOTERM_BP_DIRECT	GO:0006999~nuclear pore organization	6	0.676437	0.0263487	Q02630, P48837, P40548, P39685, P34077, Q03790	NUP116, NUP57, SNL1, POM152, NIC96, NUP53	856	12	5557	3.24591	1	0.460926	35.788
UP_SEQ_FEATURE	repeat:GLFG 8	4	0.450958	0.0269873	Q02630, P48837, Q02199, Q02629	NUP116, NUP57, NUP49, NUP100	887	5	5872	5.29605	1	0.888198	37.2401
UP_SEQ_FEATURE	repeat:GLFG 5	4	0.450958	0.0269873	Q02630, P48837, Q02199, Q02629	NUP116, NUP57, NUP49, NUP100	887	5	5872	5.29605	1	0.888198	37.2401
INTERPRO	IPR025574:Nucleoporin FG repeat	4	0.450958	0.0360886	Q02630, P48837, Q02199, Q02629	NUP116, NUP57, NUP49, NUP100	849	5	5053	4.76137	1	0.940782	45.8039
GOTERM_MF_DIRECT	GO:0017056~structural constituent of nuclear pore	9	1.01466	0.0493316	Q02630, P48837, P14907, P39685, P39705, Q02199, P34077, Q02629, P53011	NUP116, NUP57, NSP1, POM152, NUP60, NUP49, NIC96, NUP100, SEH1	798	26	4885	2.119	1	0.658487	54.0422
UP_SEQ_FEATURE	repeat:FG 7	3	0.338219	0.0613834	Q02630, P14907, Q02629	NUP116, NSP1, NUP100	887	3	5872	6.62007	1	0.982113	65.996
UP_SEQ_FEATURE	repeat:FG 10	3	0.338219	0.0613834	Q02630, P14907, Q02629	NUP116, NSP1, NUP100	887	3	5872	6.62007	1	0.982113	65.996
UP_SEQ_FEATURE	repeat:GLFG 7	3	0.338219	0.0613834	Q02630, P48837, Q02629	NUP116, NUP57, NUP100	887	3	5872	6.62007	1	0.982113	65.996
UP_SEQ_FEATURE	repeat:GLFG 9	3	0.338219	0.0613834	P48837, Q02199, Q02629	NUP57, NUP49, NUP100	887	3	5872	6.62007	1	0.982113	65.996
UP_SEQ_FEATURE	repeat:FG 9	3	0.338219	0.0613834	Q02630, P14907, Q02629	NUP116, NSP1, NUP100	887	3	5872	6.62007	1	0.982113	65.996
UP_SEQ_FEATURE	repeat:FG 8	3	0.338219	0.0613834	Q02630, P14907, Q02629	NUP116, NSP1, NUP100	887	3	5872	6.62007	1	0.982113	65.996
KEGG_PATHWAY	sce03013:RNA transport	23	2.59301	0.0954057	Q08920, Q02630, P48837, P40066, P14907, P11745, P52918, Q02629, P34077, P53011, P30822, Q99257, Q03790, P40457, Q05775, Q12306, Q06142, Q04491, Q02199, Q07478, P34160, Q02455, P48412	CBC2, NUP116, NUP57, GLE2, NSP1, RNA1, MSN5, NUP100, NIC96, SEH1, CRM1, MEX67, NUP53, MLP2, HCR1, SMT3, KAP95, SEC13, NUP49, SUB2, STO1, MLP1, UPF3	395	93	2194	1.37368	0.99994	0.333192	66.9296
UP_SEQ_FEATURE	repeat:GLFG 4	3	0.338219	0.110612	P48837, Q02199, Q02629	NUP57, NUP49, NUP100	887	4	5872	4.96505	1	0.99606	86.4128
UP_SEQ_FEATURE	repeat:GLFG 2	3	0.338219	0.110612	Q02630, P48837, Q02199	NUP116, NUP57, NUP49	887	4	5872	4.96505	1	0.99606	86.4128
UP_SEQ_FEATURE	repeat:GLFG 6	3	0.338219	0.110612	Q02630, P48837, Q02199	NUP116, NUP57, NUP49	887	4	5872	4.96505	1	0.99606	86.4128
GOTERM_CC_DIRECT	GO:0044614~nuclear pore cytoplasmic filaments	4	0.450958	0.13847	Q02630, P40477, Q02629, P32499	NUP116, NUP159, NUP100, NUP2	874	9	5861	2.98042	1	0.646122	88.0106
GOTERM_BP_DIRECT	GO:0006409~tRNA export from nucleus	5	0.563698	0.156691	P37262, Q02630, P14907, P11745, Q02199	SOL2, NUP116, NSP1, RNA1, NUP49	856	14	5557	2.31851	1	0.907549	94.0825
UP_SEQ_FEATURE	repeat:FG 5	3	0.338219	0.166361	Q02630, P14907, Q02629	NUP116, NSP1, NUP100	887	5	5872	3.97204	1	0.9992	95.4875
UP_SEQ_FEATURE	repeat:FG 6	3	0.338219	0.166361	Q02630, P14907, Q02629	NUP116, NSP1, NUP100	887	5	5872	3.97204	1	0.9992	95.4875
Annotation Cluster 20	Enrichment Score: 2.0448469884125586
Category	Term	Count	%	PValue	Genes/Uniprot	Gene Names	List Total	Pop Hits	Pop Total	Fold Enrichment	Bonferroni	Benjamini	FDR
GOTERM_BP_DIRECT	GO:0030011~maintenance of cell polarity	9	1.01466	0.00019	Q12451, P32457, P35844, P38755, P35845, P32468, P38713, P25342, Q02201	OSH2, CDC3, KES1, OSH7, SWH1, CDC12, OSH3, CDC10, OSH6	856	13	5557	4.49434	0.245478	0.0155266	0.315022
UP_KEYWORDS	Lipid-binding	12	1.35287	0.000306	Q12451, Q06385, P47160, P47057, P35844, P38755, P35845, Q03769, Q08826, P48231, P38713, Q02201	OSH2, VPS74, ENT3, SNX4, KES1, OSH7, SWH1, ENT5, SNX3, TCB2, OSH3, OSH6	887	24	5914	3.33371	0.0878395	0.00482722	0.408691
UP_KEYWORDS	Lipid transport	12	1.35287	0.000712	Q12451, P35844, P38755, P35845, P53739, P38225, Q06263, P32660, P53844, P38713, Q06705, Q02201	OSH2, KES1, OSH7, SWH1, FPK1, FAT1, VTA1, DNF1, PDR17, OSH3, CSR1, OSH6	887	26	5914	3.07727	0.192276	0.00885781	0.946646
GOTERM_BP_DIRECT	GO:0006869~lipid transport	12	1.35287	0.00130344	Q12451, P35844, P38755, P35845, P53739, P38225, Q06263, P32660, P53844, P38713, Q06705, Q02201	OSH2, KES1, OSH7, SWH1, FPK1, FAT1, VTA1, DNF1, PDR17, OSH3, CSR1, OSH6	856	27	5557	2.88525	0.855091	0.0716015	2.14054
GOTERM_MF_DIRECT	GO:0008142~oxysterol binding	6	0.676437	0.00179761	Q12451, P35844, P38755, P35845, P38713, Q02201	OSH2, KES1, OSH7, SWH1, OSH3, OSH6	798	7	4885	5.24705	0.765893	0.105679	2.7271
INTERPRO	IPR000648:Oxysterol-binding protein	6	0.676437	0.00205274	Q12451, P35844, P38755, P35845, P38713, Q02201	OSH2, KES1, OSH7, SWH1, OSH3, OSH6	849	7	5053	5.10146	0.95759	0.468511	3.36657
INTERPRO	IPR018494:Oxysterol-binding protein, conserved site	6	0.676437	0.00205274	Q12451, P35844, P38755, P35845, P38713, Q02201	OSH2, KES1, OSH7, SWH1, OSH3, OSH6	849	7	5053	5.10146	0.95759	0.468511	3.36657
GOTERM_MF_DIRECT	GO:0008289~lipid binding	14	1.57835	0.00408432	Q06385, Q12451, P47160, Q06833, P47057, P35844, P35845, P38250, P38755, Q03769, P48231, Q08826, P38713, Q02201	VPS74, OSH2, ENT3, YPR091C, SNX4, KES1, SWH1, IST2, OSH7, ENT5, TCB2, SNX3, OSH3, OSH6	798	37	4885	2.31626	0.96322	0.176574	6.09577
GOTERM_MF_DIRECT	GO:0005545~1-phosphatidylinositol binding	5	0.563698	0.00800173	Q12451, P35845, P38713, P25342, P38856	OSH2, SWH1, OSH3, CDC10, YAP1801	798	6	4885	5.10129	0.998471	0.255244	11.6145
GOTERM_CC_DIRECT	GO:0032541~cortical endoplasmic reticulum	9	1.01466	0.0188766	Q12451, P38755, Q12246, P38250, P48231, Q99287, Q04947, P38713, Q02201	OSH2, OSH7, LCB4, IST2, TCB2, SEY1, RTN1, OSH3, OSH6	874	24	5861	2.51473	0.999844	0.201304	23.7544
GOTERM_BP_DIRECT	GO:0015918~sterol transport	6	0.676437	0.0511876	Q12451, P35844, P38755, P35845, P38713, Q02201	OSH2, KES1, OSH7, SWH1, OSH3, OSH6	856	14	5557	2.78221	1	0.645686	58.1758
UP_SEQ_FEATURE	short sequence motif:FFAT	3	0.338219	0.110612	Q12451, P35845, P38713	OSH2, SWH1, OSH3	887	4	5872	4.96505	1	0.99606	86.4128
GOTERM_BP_DIRECT	GO:0035621~ER to Golgi ceramide transport	3	0.338219	0.114516	Q12451, P35844, P38713	OSH2, KES1, OSH3	856	4	5557	4.86887	1	0.837877	86.7034
GOTERM_BP_DIRECT	GO:0034727~piecemeal microautophagy of nucleus	10	1.1274	0.168625	Q12451, P47057, P39968, P34223, P35844, P38755, P35845, P25694, P38713, Q02201	OSH2, SNX4, VAC8, SHP1, KES1, OSH7, SWH1, CDC48, OSH3, OSH6	856	41	5557	1.58337	1	0.922393	95.3285
GOTERM_MF_DIRECT	GO:0015248~sterol transporter activity	4	0.450958	0.169928	Q12451, P35844, P35845, P38713	OSH2, KES1, SWH1, OSH3	798	9	4885	2.72069	1	0.92508	94.2851
GOTERM_BP_DIRECT	GO:0015914~phospholipid transport	5	0.563698	0.408411	P38755, P32660, P53844, Q06705, Q02201	OSH7, DNF1, PDR17, CSR1, OSH6	856	21	5557	1.54567	1	0.994952	99.9835
Annotation Cluster 21	Enrichment Score: 2.014089091853497
Category	Term	Count	%	PValue	Genes/Uniprot	Gene Names	List Total	Pop Hits	Pop Total	Fold Enrichment	Bonferroni	Benjamini	FDR
UP_KEYWORDS	Kinase	47	5.29876	0.00247808	P08566, P08018, P53739, P06782, P36010, P31374, P21965, P32485, P37297, P53894, P19454, Q00772, P40160, P17157, P00549, P27466, P20485, Q03786, P24521, P12688, P24583, P15700, Q12263, Q01217, Q12055, P23293, P38063, P23291, P00560, P09880, Q12246, P16861, P41835, P16862, P38970, P18961, P07170, P38623, Q12494, P15454, P39962, P07277, P15790, P38691, Q03656, P25332, P22211	ARO1, PBS2, FPK1, SNF1, YNK1, PSK1, MCK1, HOG1, STT4, CBK1, CKA2, SLT2, RIO2, PHO85, CDC19, CMK1, CKI1, YDR248C, ERG8, YPK1, PKC1, URA6, GIN4, ARG5,6, FAP7, SGV1, PRS4, YCK1, PGK1, TRL1, LCB4, PFK1, THI6, PFK2, HAL5, YPK2, ADK1, RCK2, KCS1, GUK1, YCK3, ERG12, CKA1, KSP1, SKY1, RBK1, NPR1	887	205	5914	1.52863	0.524956	0.0271919	3.26122
UP_KEYWORDS	Transferase	128	14.4307	0.00509246	P06208, P08566, P27810, P06782, P40345, P36010, P21965, P32485, P25582, P06785, P37297, Q00772, Q03434, P38732, P39940, Q03786, P24583, P18900, P47124, P00560, P38890, P07170, P07172, P15454, P27809, P33734, Q08193, P06104, P25374, P38691, P22211, P23542, P29468, P39683, P31374, Q08686, P38295, P04046, P53894, P17157, P25358, P00549, P18544, Q12314, P33333, P24521, P33330, P41940, Q12263, Q07457,…	LEU4, ARO1, KTR1, SNF1, LRO1, YNK1, MCK1, HOG1, SPB1, CDC21, STT4, SLT2, TY1B-ML2;TY1B-JR1, EFM1, RSP5, YDR248C, PKC1, COQ1, HOC1, PGK1, SET5, ADK1, HIS5, GUK1, KRE2, HIS7, GAS5, RAD6, NFS1, KSP1, NPR1, AAT2, PAP1, NPT1, PSK1, TUM1, EHT1, ADE4, CBK1, PHO85, FEN1, CDC19, ARG8, SFM1, SLC1, ERG8, SER1, PSA1, GIN4, BRE1, OST1, TRL1, LCB4, ALG5, HAL5, RIB5, ADE17, CHO1, PIS1, YKT6, POL1, TAE1, PAA1, S…	887	690	5914	1.23685	0.783819	0.0453527	6.59492
GOTERM_MF_DIRECT	GO:0016740~transferase activity	128	14.4307	0.0718934	P06208, P08566, P27810, P06782, P40345, P36010, P21965, P32485, P25582, P06785, P37297, Q00772, Q03434, P38732, P39940, Q03786, P24583, P18900, P47124, P00560, P38890, P07170, P07172, P15454, P27809, P33734, Q08193, P06104, P25374, P38691, P22211, P23542, P29468, P39683, P31374, Q08686, P38295, P04046, P53894, P17157, P25358, P00549, P18544, Q12314, P33333, P24521, P33330, P41940, Q12263, Q07457,…	LEU4, ARO1, KTR1, SNF1, LRO1, YNK1, MCK1, HOG1, SPB1, CDC21, STT4, SLT2, TY1B-ML2;TY1B-JR1, EFM1, RSP5, YDR248C, PKC1, COQ1, HOC1, PGK1, SET5, ADK1, HIS5, GUK1, KRE2, HIS7, GAS5, RAD6, NFS1, KSP1, NPR1, AAT2, PAP1, NPT1, PSK1, TUM1, EHT1, ADE4, CBK1, PHO85, FEN1, CDC19, ARG8, SFM1, SLC1, ERG8, SER1, PSA1, GIN4, BRE1, OST1, TRL1, LCB4, ALG5, HAL5, RIB5, ADE17, CHO1, PIS1, YKT6, POL1, TAE1, PAA1, S…	798	694	4885	1.12905	1	0.737626	68.2271
Annotation Cluster 22	Enrichment Score: 1.9784351162312734
Category	Term	Count	%	PValue	Genes/Uniprot	Gene Names	List Total	Pop Hits	Pop Total	Fold Enrichment	Bonferroni	Benjamini	FDR
UP_KEYWORDS	Metalloprotease	13	1.46561	0.00200321	P32898, P43616, Q07825, P25375, P40341, P47154, P37302, Q10740, P32795, P40462, Q06010, P11914, P40483	CYM1, DUG1, FRA1, PRD1, YTA12, STE24, APE3, LAP2, YME1, TMA108, STE23, MAS2, YIL108W	887	33	5914	2.62656	0.452047	0.0237754	2.64399
GOTERM_MF_DIRECT	GO:0008237~metallopeptidase activity	14	1.57835	0.00408432	P43616, P40341, P37302, P47154, P27614, P11914, P32898, Q07825, P25375, Q10740, P32795, P40462, Q06010, P40483	DUG1, YTA12, APE3, STE24, CPS1, MAS2, CYM1, FRA1, PRD1, LAP2, YME1, TMA108, STE23, YIL108W	798	37	4885	2.31626	0.96322	0.176574	6.09577
UP_SEQ_FEATURE	metal ion-binding site:Zinc; catalytic	10	1.1274	0.00815335	P05373, P32898, P40341, P25375, P47154, Q10740, P32795, P40462, P38066, P40483	HEM2, CYM1, YTA12, PRD1, STE24, LAP2, YME1, TMA108, RIB1, YIL108W	887	25	5872	2.64803	1	0.634078	13.0124
GOTERM_MF_DIRECT	GO:0004222~metalloendopeptidase activity	9	1.01466	0.013555	P32898, P40341, P25375, P47154, P07257, Q12496, P32795, Q06010, P11914	CYM1, YTA12, PRD1, STE24, QCR2, YOL098C, YME1, STE23, MAS2	798	21	4885	2.62352	0.999984	0.334964	18.9199
UP_KEYWORDS	Protease	34	3.83315	0.0155664	P40302, P43616, P38174, P40341, P23724, P47154, P37302, P27614, P09620, P36775, P30657, Q01476, Q03434, P15367, P32898, Q07825, Q10740, P32795, P21242, P21243, P22141, Q08601, P32379, P25451, P18962, P50101, P11914, P25043, P25375, P43593, P40462, Q06010, P40483, P0C2J0	PRE5, DUG1, MAP2, YTA12, PRE7, STE24, APE3, CPS1, KEX1, PIM1, PRE4, UBP2, TY1B-ML2;TY1B-JR1, SEC11, CYM1, FRA1, LAP2, YME1, PRE10, SCL1, PRE1, MCA1, PUP2, PUP3, DAP2, UBP15, MAS2, PUP1, PRD1, UBP6, TMA108, STE23, YIL108W, TY1B-PR2;TY1B-DR5;TY1B-H;TY1B-DR1	887	152	5914	1.4914	0.990965	0.0934011	18.9132
GOTERM_BP_DIRECT	GO:0006508~proteolysis	39	4.39684	0.0162852	P40302, P43616, P38174, P40341, P23724, P47154, P37302, P27614, P09620, P36775, P30657, Q01476, Q03434, P15367, P32898, Q07825, Q10740, P32795, P21242, P21243, P40087, P38323, P22141, Q08601, P32379, P25451, P53155, P32496, P18962, P50101, P11914, P25043, P25375, P07257, P43593, P40462, Q06010, P0C2J0, P40483	PRE5, DUG1, MAP2, YTA12, PRE7, STE24, APE3, CPS1, KEX1, PIM1, PRE4, UBP2, TY1B-ML2;TY1B-JR1, SEC11, CYM1, FRA1, LAP2, YME1, PRE10, SCL1, DDI1, MCX1, PRE1, MCA1, PUP2, PUP3, YGL082W, RPN12, DAP2, UBP15, MAS2, PUP1, PRD1, QCR2, UBP6, TMA108, STE23, TY1B-PR2;TY1B-DR5;TY1B-H;TY1B-DR1, YIL108W	856	176	5557	1.43853	1	0.362572	23.8444
GOTERM_MF_DIRECT	GO:0008233~peptidase activity	35	3.94589	0.0617578	P40302, P43616, P38174, P40341, P23724, P47154, P37302, P46965, P27614, P09620, P36775, P30657, Q01476, Q03434, P15367, P32898, Q07825, Q10740, P32795, P21242, P21243, P22141, Q08601, P32379, P25451, P18962, P50101, P11914, P25043, P25375, P43593, P40462, Q06010, P0C2J0, P40483	PRE5, DUG1, MAP2, YTA12, PRE7, STE24, APE3, SPC1, CPS1, KEX1, PIM1, PRE4, UBP2, TY1B-ML2;TY1B-JR1, SEC11, CYM1, FRA1, LAP2, YME1, PRE10, SCL1, PRE1, MCA1, PUP2, PUP3, DAP2, UBP15, MAS2, PUP1, PRD1, UBP6, TMA108, STE23, TY1B-PR2;TY1B-DR5;TY1B-H;TY1B-DR1, YIL108W	798	161	4885	1.33077	1	0.714847	62.4554
Annotation Cluster 23	Enrichment Score: 1.8668569410821712
Category	Term	Count	%	PValue	Genes/Uniprot	Gene Names	List Total	Pop Hits	Pop Total	Fold Enrichment	Bonferroni	Benjamini	FDR
UP_KEYWORDS	Calmodulin-binding	7	0.789177	0.00261209	P19524, P32492, P27466, P23287, P17891, P38623, P14747	MYO2, MYO4, CMK1, CNA1, CLC1, RCK2, CMP2	887	11	5914	4.2429	0.543721	0.0276343	3.43473
GOTERM_MF_DIRECT	GO:0005516~calmodulin binding	8	0.901917	0.00577283	P19524, P32492, P27466, P23287, P17891, P38623, P32485, P14747	MYO2, MYO4, CMK1, CNA1, CLC1, RCK2, HOG1, CMP2	798	15	4885	3.26483	0.990648	0.199473	8.51285
UP_SEQ_FEATURE	region of interest:Calmodulin-binding	3	0.338219	0.166361	P27466, P38623, P14747	CMK1, RCK2, CMP2	887	5	5872	3.97204	1	0.9992	95.4875
Annotation Cluster 24	Enrichment Score: 1.8582953400846463
Category	Term	Count	%	PValue	Genes/Uniprot	Gene Names	List Total	Pop Hits	Pop Total	Fold Enrichment	Bonferroni	Benjamini	FDR
GOTERM_BP_DIRECT	GO:0009113~purine nucleobase biosynthetic process	5	0.563698	0.00643799	Q02046, P33330, P07245, P04046, P07244	MTD1, SER1, ADE3, ADE4, ADE5,7	856	6	5557	5.40985	0.99993	0.212693	10.1609
UP_KEYWORDS	Purine biosynthesis	8	0.901917	0.0116166	Q02046, P38009, P07245, P27616, Q05911, P04046, P07244, P80210	MTD1, ADE17, ADE3, ADE1, ADE13, ADE4, ADE5,7, ADE12	887	18	5914	2.9633	0.969964	0.078286	14.4562
GOTERM_BP_DIRECT	GO:0006164~purine nucleotide biosynthetic process	8	0.901917	0.0134019	Q02046, P38009, P07245, P27616, Q05911, P04046, P07244, P80210	MTD1, ADE17, ADE3, ADE1, ADE13, ADE4, ADE5,7, ADE12	856	18	5557	2.88525	1	0.32417	20.0556
GOTERM_BP_DIRECT	GO:0006189~'de novo' IMP biosynthetic process	5	0.563698	0.0367978	P38009, P27616, Q05911, P04046, P07244	ADE17, ADE1, ADE13, ADE4, ADE5,7	856	9	5557	3.60657	1	0.552786	46.3121
Annotation Cluster 25	Enrichment Score: 1.8347134682796822
Category	Term	Count	%	PValue	Genes/Uniprot	Gene Names	List Total	Pop Hits	Pop Total	Fold Enrichment	Bonferroni	Benjamini	FDR
UP_KEYWORDS	DNA replication	20	2.25479	0.00413653	P24279, P53091, P22336, P09938, P38251, P32558, Q04636, P40348, P38121, P30665, P29469, P40339, P14164, Q07896, Q01454, P26754, P13382, P38630, P15873, P49723	MCM3, MCM6, RFA1, RNR2, RFC5, SPT16, POB3, RFC2, POL12, MCM4, MCM2, RFC4, ABF1, NOC3, CTF4, RFA2, POL1, RFC1, POL30, RNR4	887	68	5914	1.96101	0.711636	0.03932	5.3885
KEGG_PATHWAY	sce03030:DNA replication	13	1.46561	0.00500008	P24279, P22336, P53091, P38251, P40348, P38121, P30665, P29469, P40339, P26754, P13382, P38630, P15873	MCM3, RFA1, MCM6, RFC5, RFC2, POL12, MCM4, MCM2, RFC4, RFA2, POL1, RFC1, POL30	395	31	2194	2.32928	0.385056	0.0474593	5.38154
GOTERM_BP_DIRECT	GO:0006260~DNA replication	21	2.36753	0.0124034	P24279, P53091, P22336, P09938, P38251, P32558, Q04636, P40348, P38121, P30665, P29469, P40339, P14164, Q07896, Q01454, P26754, P31384, P13382, P38630, P15873, P49723	MCM3, MCM6, RFA1, RNR2, RFC5, SPT16, POB3, RFC2, POL12, MCM4, MCM2, RFC4, ABF1, NOC3, CTF4, RFA2, CCR4, POL1, RFC1, POL30, RNR4	856	78	5557	1.7478	1	0.325163	18.7026
GOTERM_BP_DIRECT	GO:0006270~DNA replication initiation	9	1.01466	0.178645	Q07896, P24279, P53091, Q01454, P13382, P07170, P38121, P29469, P30665	NOC3, MCM3, MCM6, CTF4, POL1, ADK1, POL12, MCM2, MCM4	856	36	5557	1.62296	1	0.927616	96.1798
Annotation Cluster 26	Enrichment Score: 1.7718987962885153
Category	Term	Count	%	PValue	Genes/Uniprot	Gene Names	List Total	Pop Hits	Pop Total	Fold Enrichment	Bonferroni	Benjamini	FDR
GOTERM_MF_DIRECT	GO:0005487~nucleocytoplasmic transporter activity	10	1.1274	0.000549	Q02630, P48837, P14907, P40477, P39705, Q02199, Q02629, Q02455, P32499, Q03790	NUP116, NUP57, NSP1, NUP159, NUP60, NUP49, NUP100, MLP1, NUP2, NUP53	798	17	4885	3.60091	0.358228	0.0539315	0.841038
GOTERM_BP_DIRECT	GO:0034398~telomere tethering at nuclear periphery	6	0.676437	0.0673852	P40457, Q02630, Q03661, P39705, Q02629, Q02455	MLP2, NUP116, ESC1, NUP60, NUP100, MLP1	856	15	5557	2.59673	1	0.703444	68.5682
GOTERM_BP_DIRECT	GO:0000973~posttranscriptional tethering of RNA polymerase II gene DNA at nuclear periphery	6	0.676437	0.130562	P40457, Q02630, P40066, P39705, Q02629, P32499	MLP2, NUP116, GLE2, NUP60, NUP100, NUP2	856	18	5557	2.16394	1	0.86885	90.1828
Annotation Cluster 27	Enrichment Score: 1.7097900125294971
Category	Term	Count	%	PValue	Genes/Uniprot	Gene Names	List Total	Pop Hits	Pop Total	Fold Enrichment	Bonferroni	Benjamini	FDR
GOTERM_CC_DIRECT	GO:0005768~endosome	31	3.49493	0.011229	P32521, P40343, Q08826, P32660, P52917, P06780, P37296, Q06705, P38724, P38555, Q07878, P38759, P47057, P48582, Q03769, Q12071, P38753, P39013, P47160, Q12246, Q06263, P53844, P51996, P32790, P36015, Q03921, P36017, P25604, P33328, P14359, P32074	PAN1, VPS27, SNX3, DNF1, VPS4, RHO1, STV1, CSR1, ARN2, YPT31, VPS13, VPS29, SNX4, BRO1, ENT5, VPS54, HSE1, END3, ENT3, LCB4, VTA1, PDR17, YPT32, SLA1, YKT6, DOP1, VPS21, STP22, SNC2, SNA3, SEC21	874	133	5861	1.56304	0.994453	0.149839	14.8461
GOTERM_CC_DIRECT	GO:0010008~endosome membrane	17	1.91657	0.0196517	P32521, P40343, Q06263, P32660, P52917, P37296, P06780, P38724, P32790, P36017, P47057, P48582, P39940, Q03769, P38753, Q12071, P39013	PAN1, VPS27, VTA1, DNF1, VPS4, STV1, RHO1, ARN2, SLA1, VPS21, SNX4, BRO1, RSP5, ENT5, HSE1, VPS54, END3	874	63	5861	1.80954	0.999892	0.20407	24.6071
UP_KEYWORDS	Endosome	21	2.36753	0.0336427	P32521, Q12246, P40343, Q06263, P32660, P52917, P37296, P06780, Q06705, P38724, P32790, P36017, P47057, P48582, Q03769, P38753, Q12071, P39013, P25604, P14359, P32074	PAN1, LCB4, VPS27, VTA1, DNF1, VPS4, STV1, RHO1, CSR1, ARN2, SLA1, VPS21, SNX4, BRO1, ENT5, HSE1, VPS54, END3, STP22, SNA3, SEC21	887	88	5914	1.59109	0.999965	0.182336	36.7012
Annotation Cluster 28	Enrichment Score: 1.704251841313987
Category	Term	Count	%	PValue	Genes/Uniprot	Gene Names	List Total	Pop Hits	Pop Total	Fold Enrichment	Bonferroni	Benjamini	FDR
GOTERM_BP_DIRECT	GO:0006626~protein targeting to mitochondrion	20	2.25479	0.00321461	P38825, Q01852, P27882, P53299, P10591, P11914, P47045, P36046, P53507, Q02776, P02829, P49334, P53220, P32891, P04840, Q04341, P23644, P57744, P07213, P80967	TOM71, TIM44, ERV1, TIM13, SSA1, MAS2, TIM54, MIA40, TOM7, TIM50, HSP82, TOM22, TIM21, DLD1, POR1, MIX14, TOM40, TIM8, TOM70, TOM5	856	65	5557	1.99748	0.991507	0.130859	5.20139
GOTERM_MF_DIRECT	GO:0015266~protein channel activity	8	0.901917	0.00884013	P38825, P53507, Q02776, P49334, P23644, P07213, P47045, P80967	TOM71, TOM7, TIM50, TOM22, TOM40, TOM70, TIM54, TOM5	798	16	4885	3.06078	0.999227	0.258122	12.7555
UP_SEQ_FEATURE	topological domain:Mitochondrial intermembrane	11	1.24014	0.27143	P36046, P39952, P38825, P53507, Q02776, P49334, P40515, P53220, P25573, P07213, P47045	MIA40, OXA1, TOM71, TOM7, TIM50, TOM22, FIS1, TIM21, MGR1, TOM70, TIM54	887	53	5872	1.37398	1	0.999957	99.5448
Annotation Cluster 29	Enrichment Score: 1.6943224777715
Category	Term	Count	%	PValue	Genes/Uniprot	Gene Names	List Total	Pop Hits	Pop Total	Fold Enrichment	Bonferroni	Benjamini	FDR
UP_SEQ_FEATURE	metal ion-binding site:Magnesium	17	1.91657	0.000545	P00925, P41835, P05030, P04046, P80210, P38628, P06169, P00549, Q99321, P32626, P31384, Q03262, P39986, P40081, P38063, P08678, Q08220	ENO2, THI6, PMA1, ADE4, ADE12, PCM1, PDC1, CDC19, DDP1, UTR4, CCR4, PGM3, SPF1, YER134C, PRS4, CYR1, GSH2	887	45	5872	2.50091	0.633435	0.221896	0.923446
GOTERM_MF_DIRECT	GO:0000287~magnesium ion binding	17	1.91657	0.0954653	P00925, P29468, P32660, P40495, P38710, P80210, P38628, P06169, P00549, P32626, Q03262, Q12486, P00817, P38063, P32179, P08678, Q08220	ENO2, PAP1, DNF1, LYS12, INM1, ADE12, PCM1, PDC1, CDC19, UTR4, PGM3, YOR131C, IPP1, PRS4, MET22, CYR1, GSH2	798	70	4885	1.48666	1	0.80842	78.6026
UP_KEYWORDS	Magnesium	39	4.39684	0.158871	P00925, P29468, P05030, P32660, P36010, P32861, P04046, P40160, P80210, P06169, P00549, P13587, Q03434, P13586, P39966, Q03262, P18900, P39986, P00817, P38063, P40081, P08678, P32179, P16861, P41835, P16862, P38710, P40495, P08518, P38628, Q99321, P32626, P08524, P31384, P47119, P39002, P25332, P0C2J0, Q08220	ENO2, PAP1, PMA1, DNF1, YNK1, UGP1, ADE4, RIO2, ADE12, PDC1, CDC19, ENA1, TY1B-ML2;TY1B-JR1, PMR1, PTC2, PGM3, COQ1, SPF1, IPP1, PRS4, YER134C, CYR1, MET22, PFK1, THI6, PFK2, INM1, LYS12, RPB2, PCM1, DDP1, UTR4, ERG20, CCR4, HAM1, FAA3, RBK1, TY1B-PR2;TY1B-DR5;TY1B-H;TY1B-DR1, GSH2	887	216	5914	1.20384	1	0.499446	90.0931
Annotation Cluster 30	Enrichment Score: 1.6422916358259765
Category	Term	Count	%	PValue	Genes/Uniprot	Gene Names	List Total	Pop Hits	Pop Total	Fold Enrichment	Bonferroni	Benjamini	FDR
GOTERM_BP_DIRECT	GO:0006103~2-oxoglutarate metabolic process	6	0.676437	0.000447	P23542, P20967, P19955, P19262, P09624, Q01802	AAT2, KGD1, YMR31, KGD2, LPD1, AAT1	856	6	5557	6.49182	0.484175	0.0310316	0.738798
GOTERM_CC_DIRECT	GO:0009353~mitochondrial oxoglutarate dehydrogenase complex	4	0.450958	0.0117119	P20967, P19955, P19262, P09624	KGD1, YMR31, KGD2, LPD1	874	4	5861	6.70595	0.99557	0.151446	15.4361
GOTERM_MF_DIRECT	GO:0004591~oxoglutarate dehydrogenase (succinyl-transferring) activity	3	0.338219	0.0711139	P20967, P19955, P09624	KGD1, YMR31, LPD1	798	3	4885	6.12155	1	0.741534	67.8145
GOTERM_BP_DIRECT	GO:0006099~tricarboxylic acid cycle	5	0.563698	0.724523	P20967, P19955, P32419, P19262, Q00711	KGD1, YMR31, MDH3, KGD2, SDH1	856	31	5557	1.04707	1	0.999972	100
Annotation Cluster 31	Enrichment Score: 1.6218645489106125
Category	Term	Count	%	PValue	Genes/Uniprot	Gene Names	List Total	Pop Hits	Pop Total	Fold Enrichment	Bonferroni	Benjamini	FDR
GOTERM_MF_DIRECT	GO:0015266~protein channel activity	8	0.901917	0.00884013	P38825, P53507, Q02776, P49334, P23644, P07213, P47045, P80967	TOM71, TOM7, TIM50, TOM22, TOM40, TOM70, TIM54, TOM5	798	16	4885	3.06078	0.999227	0.258122	12.7555
GOTERM_CC_DIRECT	GO:0005742~mitochondrial outer membrane translocase complex	5	0.563698	0.0117501	P53507, P49334, P23644, P07213, P80967	TOM7, TOM22, TOM40, TOM70, TOM5	874	7	5861	4.78996	0.995648	0.147782	15.4825
GOTERM_BP_DIRECT	GO:0030150~protein import into mitochondrial matrix	9	1.01466	0.017381	P53507, Q01852, Q02776, P38323, P49334, P32795, P53220, P23644, P07213	TOM7, TIM44, TIM50, MCX1, TOM22, YME1, TIM21, TOM40, TOM70	856	23	5557	2.54028	1	0.376333	25.2396
GOTERM_CC_DIRECT	GO:0031307~integral component of mitochondrial outer membrane	7	0.789177	0.180288	P38825, P53507, P49334, P54783, P04840, P07213, P80967	TOM71, TOM7, TOM22, ALO1, POR1, TOM70, TOM5	874	26	5861	1.80545	1	0.714276	94.0944
Annotation Cluster 32	Enrichment Score: 1.6154806192340005
Category	Term	Count	%	PValue	Genes/Uniprot	Gene Names	List Total	Pop Hits	Pop Total	Fold Enrichment	Bonferroni	Benjamini	FDR
UP_KEYWORDS	Exocytosis	8	0.901917	0.00548055	P07560, P33332, P32855, Q06245, P51996, P38261, Q12344, P89102	SEC4, SEC3, SEC8, SEC10, YPT32, EXO84, GYP5, SEC5	887	16	5914	3.33371	0.807698	0.0473339	7.08064
GOTERM_BP_DIRECT	GO:0006893~Golgi to plasma membrane transport	9	1.01466	0.017381	P07560, P33332, P32855, Q06245, P38261, P11076, P89102, Q06705, P33328	SEC4, SEC3, SEC8, SEC10, EXO84, ARF1, SEC5, CSR1, SNC2	856	23	5557	2.54028	1	0.376333	25.2396
GOTERM_BP_DIRECT	GO:0090522~vesicle tethering involved in exocytosis	5	0.563698	0.0232228	P33332, P32855, Q06245, P38261, P89102	SEC3, SEC8, SEC10, EXO84, SEC5	856	8	5557	4.05739	1	0.440088	32.281
GOTERM_CC_DIRECT	GO:0000145~exocyst	5	0.563698	0.0330307	P33332, P32855, Q06245, P38261, P89102	SEC3, SEC8, SEC10, EXO84, SEC5	874	9	5861	3.72553	1	0.301848	37.9987
GOTERM_BP_DIRECT	GO:0001927~exocyst assembly	3	0.338219	0.114516	P33332, P38261, P89102	SEC3, EXO84, SEC5	856	4	5557	4.86887	1	0.837877	86.7034
Annotation Cluster 33	Enrichment Score: 1.608102027051161
Category	Term	Count	%	PValue	Genes/Uniprot	Gene Names	List Total	Pop Hits	Pop Total	Fold Enrichment	Bonferroni	Benjamini	FDR
GOTERM_BP_DIRECT	GO:0043044~ATP-dependent chromatin remodeling	11	1.24014	0.00176337	P32832, P32597, P25632, P32657, P38144, P32591, Q07979, Q12406, Q06488, P43609, Q06168	NPL6, STH1, RSC6, CHD1, ISW1, SWI3, RSC58, ARP7, RSC2, RSC8, SFH1	856	24	5557	2.97542	0.926748	0.0861903	2.88552
UP_KEYWORDS	Chromatin regulator	22	2.48027	0.0827976	P32832, Q03010, P32657, P38144, P38811, Q12406, P39984, Q06168, P80428, P36124, P32597, P25632, P38199, Q12464, Q02959, P22579, P06104, P50947, Q07979, Q06488, P43609, Q07457	NPL6, UME1, CHD1, ISW1, TRA1, ARP7, HAT2, SFH1, ARP4, SET3, STH1, RSC6, HEK2, RVB2, HOS3, SIN3, RAD6, PHO23, RSC58, RSC2, RSC8, BRE1	887	103	5914	1.42411	1	0.333108	68.4919
GOTERM_BP_DIRECT	GO:0016569~covalent chromatin modification	22	2.48027	0.102644	P32832, Q03010, P32657, P38144, P38811, Q12406, P39984, Q06168, P80428, P36124, P32597, P25632, P38199, Q12464, Q02959, P22579, P06104, P50947, Q07979, Q06488, P43609, Q07457	NPL6, UME1, CHD1, ISW1, TRA1, ARP7, HAT2, SFH1, ARP4, SET3, STH1, RSC6, HEK2, RVB2, HOS3, SIN3, RAD6, PHO23, RSC58, RSC2, RSC8, BRE1	856	103	5557	1.3866	1	0.815181	83.4157
Annotation Cluster 34	Enrichment Score: 1.5803955636455642
Category	Term	Count	%	PValue	Genes/Uniprot	Gene Names	List Total	Pop Hits	Pop Total	Fold Enrichment	Bonferroni	Benjamini	FDR
UP_KEYWORDS	Lipid biosynthesis	22	2.48027	0.00589001	P32377, P39006, P16603, P08456, P38286, P06197, P25358, P12683, P12684, P38071, P32463, P08524, P20485, P35844, P07277, P24521, P33333, P25087, P53199, P25340, P39525, Q03579	MVD1, PSD1, NCP1, CHO1, IFA38, PIS1, FEN1, HMG1, HMG2, ETR1, ACP1, ERG20, CKI1, KES1, ERG12, ERG8, SLC1, ERG6, ERG26, ERG4, CEM1, LIP1	887	80	5914	1.83354	0.830046	0.046769	7.59056
UP_KEYWORDS	Lipid metabolism	30	3.38219	0.0547702	P39006, Q04958, P39105, Q06705, P25358, P12683, P12684, P32463, P20485, P24521, P33333, Q12354, P25340, Q03579, P32377, Q12246, P40970, P16603, P08456, P38286, P06197, Q06346, P38071, P08524, P35844, P07277, P25087, P53199, P39002, P39525	PSD1, NTE1, PLB1, CSR1, FEN1, HMG1, HMG2, ACP1, CKI1, ERG8, SLC1, YLR118C, ERG4, LIP1, MVD1, LCB4, LCB2, NCP1, CHO1, IFA38, PIS1, KEI1, ETR1, ERG20, KES1, ERG12, ERG6, ERG26, FAA3, CEM1	887	144	5914	1.38905	1	0.252744	52.8908
GOTERM_BP_DIRECT	GO:0006629~lipid metabolic process	32	3.60767	0.056254	P39006, P40345, Q04958, P39105, Q06705, P25358, P12683, P12684, P32463, P20485, P24521, Q02979, P33333, Q12354, P25340, Q03579, P32377, Q12246, P40970, P16603, P08456, P38286, P06197, Q06346, P38071, P35844, P08524, P07277, P25087, P53199, P39002, P39525	PSD1, LRO1, NTE1, PLB1, CSR1, FEN1, HMG1, HMG2, ACP1, CKI1, ERG8, GDE1, SLC1, YLR118C, ERG4, LIP1, MVD1, LCB4, LCB2, NCP1, CHO1, IFA38, PIS1, KEI1, ETR1, KES1, ERG20, ERG12, ERG6, ERG26, FAA3, CEM1	856	152	5557	1.3667	1	0.657622	61.7305
Annotation Cluster 35	Enrichment Score: 1.5782989089200004
Category	Term	Count	%	PValue	Genes/Uniprot	Gene Names	List Total	Pop Hits	Pop Total	Fold Enrichment	Bonferroni	Benjamini	FDR
GOTERM_BP_DIRECT	GO:0000001~mitochondrion inheritance	11	1.24014	0.011302	P19524, Q05933, P60010, P40961, P47117, P40518, P40414, P17536, P50085, P33204, P54861	MYO2, ARC18, ACT1, PHB1, ARP3, ARC15, TPM2, TPM1, PHB2, ARC19, DNM1	856	30	5557	2.38033	1	0.30646	17.1853
GOTERM_CC_DIRECT	GO:0005885~Arp2/3 protein complex	5	0.563698	0.0207579	Q05933, Q06440, P47117, P40518, P33204	ARC18, CRN1, ARP3, ARC15, ARC19	874	8	5861	4.19122	0.999936	0.209702	25.8089
GOTERM_BP_DIRECT	GO:0034314~Arp2/3 complex-mediated actin nucleation	4	0.450958	0.0784809	Q05933, P47117, P40518, P33204	ARC18, ARP3, ARC15, ARC19	856	7	5557	3.70961	1	0.739445	74.2287
Annotation Cluster 36	Enrichment Score: 1.5472454256664228
Category	Term	Count	%	PValue	Genes/Uniprot	Gene Names	List Total	Pop Hits	Pop Total	Fold Enrichment	Bonferroni	Benjamini	FDR
GOTERM_CC_DIRECT	GO:0008541~proteasome regulatory particle, lid subcomplex	7	0.789177	0.00131652	Q04062, P40016, P32496, Q06103, Q12377, Q12250, Q08723	RPN9, RPN3, RPN12, RPN7, RPN6, RPN5, RPN8	874	10	5861	4.69416	0.454471	0.0260037	1.85738
INTERPRO	IPR011991:Winged helix-turn-helix DNA-binding domain	15	1.69109	0.0433386	P10961, P38174, P40016, P40160, Q04062, P47170, P26754, P53551, P32591, P43609, Q06103, Q12377, Q12250, P41896, Q12018	HSF1, MAP2, RPN3, RIO2, RPN9, IML1, RFA2, HHO1, SWI3, RSC8, RPN7, RPN6, RPN5, TFG2, CDC53	849	52	5053	1.71684	1	0.948321	52.2114
SMART	SM00088:PINT	5	0.563698	0.0483702	Q04062, P40016, Q06103, Q12377, Q12250	RPN9, RPN3, RPN7, RPN6, RPN5	341	8	1776	3.25513	0.999985	0.975324	46.8973
INTERPRO	IPR000717:Proteasome component (PCI) domain	5	0.563698	0.0710462	Q04062, P40016, Q06103, Q12377, Q12250	RPN9, RPN3, RPN7, RPN6, RPN5	849	10	5053	2.97585	1	0.979928	70.7179
UP_SEQ_FEATURE	domain:PCI	5	0.563698	0.0936164	Q04062, P40016, Q06103, Q12377, Q12250	RPN9, RPN3, RPN7, RPN6, RPN5	887	12	5872	2.75836	1	0.994332	81.2453
Annotation Cluster 37	Enrichment Score: 1.469460979969764
Category	Term	Count	%	PValue	Genes/Uniprot	Gene Names	List Total	Pop Hits	Pop Total	Fold Enrichment	Bonferroni	Benjamini	FDR
GOTERM_MF_DIRECT	GO:0016614~oxidoreductase activity, acting on CH-OH group of donors	5	0.563698	0.00306293	P54783, P53183, P39976, P46681, P32891	ALO1, YGL039W, DLD3, DLD2, DLD1	798	5	4885	6.12155	0.915886	0.143348	4.60482
UP_SEQ_FEATURE	domain:FAD-binding PCMH-type	4	0.450958	0.012155	P54783, P39976, P46681, P32891	ALO1, DLD3, DLD2, DLD1	887	4	5872	6.62007	1	0.694443	18.7991
INTERPRO	IPR016167:FAD-binding, type 2, subdomain 1	4	0.450958	0.0164847	P54783, P39976, P46681, P32891	ALO1, DLD3, DLD2, DLD1	849	4	5053	5.95171	1	0.797659	24.1959
INTERPRO	IPR016169:CO dehydrogenase flavoprotein-like, FAD-binding, subdomain 2	4	0.450958	0.0164847	P54783, P39976, P46681, P32891	ALO1, DLD3, DLD2, DLD1	849	4	5053	5.95171	1	0.797659	24.1959
INTERPRO	IPR006094:FAD linked oxidase, N-terminal	4	0.450958	0.0164847	P54783, P39976, P46681, P32891	ALO1, DLD3, DLD2, DLD1	849	4	5053	5.95171	1	0.797659	24.1959
INTERPRO	IPR016166:FAD-binding, type 2	4	0.450958	0.0164847	P54783, P39976, P46681, P32891	ALO1, DLD3, DLD2, DLD1	849	4	5053	5.95171	1	0.797659	24.1959
GOTERM_MF_DIRECT	GO:0050660~flavin adenine dinucleotide binding	9	1.01466	0.0493316	P54783, P27882, P39976, P32476, P46681, P16603, P32891, P09624, Q00711	ALO1, ERV1, DLD3, ERG1, DLD2, NCP1, DLD1, LPD1, SDH1	798	26	4885	2.119	1	0.658487	54.0422
GOTERM_MF_DIRECT	GO:0004458~D-lactate dehydrogenase (cytochrome) activity	3	0.338219	0.0711139	P39976, P46681, P32891	DLD3, DLD2, DLD1	798	3	4885	6.12155	1	0.741534	67.8145
INTERPRO	IPR016171:Vanillyl-alcohol oxidase, C-terminal subdomain 2	3	0.338219	0.0749836	P39976, P46681, P32891	DLD3, DLD2, DLD1	849	3	5053	5.95171	1	0.98161	72.7191
INTERPRO	IPR004113:FAD-linked oxidase, C-terminal	3	0.338219	0.0749836	P39976, P46681, P32891	DLD3, DLD2, DLD1	849	3	5053	5.95171	1	0.98161	72.7191
INTERPRO	IPR016164:FAD-linked oxidase-like, C-terminal	3	0.338219	0.0749836	P39976, P46681, P32891	DLD3, DLD2, DLD1	849	3	5053	5.95171	1	0.98161	72.7191
COG_ONTOLOGY	Energy production and conversion	6	0.676437	0.571833	P39976, P16387, P38698, P32340, P46681, P32891	DLD3, PDA1, PPX1, NDI1, DLD2, DLD1	211	23	977	1.20791	1	0.948637	99.961
Annotation Cluster 38	Enrichment Score: 1.4529844449560851
Category	Term	Count	%	PValue	Genes/Uniprot	Gene Names	List Total	Pop Hits	Pop Total	Fold Enrichment	Bonferroni	Benjamini	FDR
GOTERM_BP_DIRECT	GO:0001174~transcriptional start site selection at RNA polymerase II promoter	6	0.676437	0.00136536	P41895, P35189, P29055, P41896, Q03973, P21538	TFG1, TAF14, SUA7, TFG2, HMO1, REB1	856	7	5557	5.56442	0.867805	0.0722042	2.24115
GOTERM_BP_DIRECT	GO:0006367~transcription initiation from RNA polymerase II promoter	7	0.789177	0.0262453	P41895, P32774, P35189, P36145, P41896, P34087, P36100	TFG1, TOA2, TAF14, TFA2, TFG2, RPB7, TFA1	856	16	5557	2.84017	1	0.464853	35.6748
GOTERM_MF_DIRECT	GO:0000991~transcription factor activity, core RNA polymerase II binding	5	0.563698	0.0446396	Q06505, P41895, P35189, P41896, P23615	SPN1, TFG1, TAF14, TFG2, SPT6	798	9	4885	3.40086	1	0.65109	50.4301
GOTERM_MF_DIRECT	GO:0001139~transcription factor activity, core RNA polymerase II recruiting	4	0.450958	0.0588328	P41895, P35189, P29055, P41896	TFG1, TAF14, SUA7, TFG2	798	6	4885	4.08104	1	0.705742	60.6158
GOTERM_CC_DIRECT	GO:0005674~transcription factor TFIIF complex	3	0.338219	0.059904	P41895, P35189, P41896	TFG1, TAF14, TFG2	874	3	5861	6.70595	1	0.427173	58.4855
KEGG_PATHWAY	sce03022:Basal transcription factors	10	1.1274	0.104508	P41895, P53040, P32774, P35189, P36145, P29055, Q12030, P41896, Q03761, P36100	TFG1, TAF6, TOA2, TAF14, TFA2, SUA7, TAF10, TFG2, TAF12, TFA1	395	32	2194	1.73576	0.999978	0.348372	70.4219
GOTERM_BP_DIRECT	GO:0001111~promoter clearance from RNA polymerase II promoter	3	0.338219	0.114516	P41895, P35189, P41896	TFG1, TAF14, TFG2	856	4	5557	4.86887	1	0.837877	86.7034
Annotation Cluster 39	Enrichment Score: 1.4470835425595376
Category	Term	Count	%	PValue	Genes/Uniprot	Gene Names	List Total	Pop Hits	Pop Total	Fold Enrichment	Bonferroni	Benjamini	FDR
UP_KEYWORDS	SH3 domain	9	1.01466	0.0149133	P43603, P39969, Q04439, P38753, Q06449, P29366, P27637, P32790, Q12163	LSB3, BOI2, MYO5, HSE1, PIN3, BEM1, BUD14, SLA1, NBP2	887	23	5914	2.60899	0.988976	0.0914526	18.1914
INTERPRO	IPR001452:Src homology-3 domain	9	1.01466	0.0283079	P43603, P39969, Q04439, P38753, Q06449, P29366, P27637, P32790, Q12163	LSB3, BOI2, MYO5, HSE1, PIN3, BEM1, BUD14, SLA1, NBP2	849	23	5053	2.32893	1	0.914021	38.0335
SMART	SM00326:SH3	9	1.01466	0.0562224	P43603, P39969, Q04439, P38753, Q06449, P29366, P27637, P32790, Q12163	LSB3, BOI2, MYO5, HSE1, PIN3, BEM1, BUD14, SLA1, NBP2	341	23	1776	2.038	0.999998	0.925155	52.2275
UP_SEQ_FEATURE	domain:SH3	7	0.789177	0.0685921	P43603, P39969, Q04439, P38753, Q06449, P27637, Q12163	LSB3, BOI2, MYO5, HSE1, PIN3, BUD14, NBP2	887	20	5872	2.31702	1	0.985334	70.1795
Annotation Cluster 40	Enrichment Score: 1.4203650655467681
Category	Term	Count	%	PValue	Genes/Uniprot	Gene Names	List Total	Pop Hits	Pop Total	Fold Enrichment	Bonferroni	Benjamini	FDR
[truncated: 937 more rows]
