# Supplementary material for: The cellular economy of the Saccharomyces cerevisiae zinc proteome
Source: Royal Society of Chemistry journal article supplement (doi:10.1039/c8mt00269j), 2018-01-01
Supplement: c8mt00269j6.xlsx [file c8mt00269j6.xlsx]

## Sheet: Summary
Systematic Name	Gene Name	Primer	Primer Sequence
YPR062W	FCY1	FCY1-5'	GGAATGGCAAGCAAGTGGGAT
		FCY1-3'	TGACCACGACCGAGAACACT
YPL237W	SUI3	SUI3-5'	AGGATTCGACCCTGCACTAAAGAA
		SUI3-3'	GCCGTTTACGGCAGCATCAA
YOR341W	RPA190	RPA190-5'	TCCGCTAGAATTGTGGTGGGT
		RPA190-3'	GCCGCATTTGGAACCTTTGC
YPL111W	CAR1	CAR1-5'	GGTTGGTGAAGCCACCAAGTT
		CAR1-3'	ATCTGTTCGCCTGGACCACT
YMR318C	ADH6	ADH6-5'	GTCGGTCAACGTGTTGGTGT
		ADH6-3'	ATAGCCACCCTGCGACACAT
YMR083W	ADH3	ADH3-5'	GCGTGTCCAACCAAGCCTATT
		ADH3-3'	GTCTTAGGGATTGCAGCTGTGG
YPR041W	TIF5	TIF5-5'	TGGAGCAGGCTGGTGAAGAT
		TIF5-3'	ATTGCGCCAAGACACAACCA
YNL141W	AAH1	AAH1-5'	CACACGCAGGTGAAGAAGGC
		AAH1-3'	CGCGCGACAACCTATCCAAT
YNL064C	YDJ1	YDJ1-5'	TCCCAGCCATTCCAAAGAAAGC
		YDJ1-3'	CATTGAACACCTTCGCCACCT
YLR420W	URA4	URA4-5'	AGCCACTGACGTAAAGGTTGC
		URA4-3'	TACCGGATTTCCGGCCCAAT
YLR401C	DUS3	DUS3-5'	TGCGGATTGGGACTACGTGA
		DUS3-3'	CCCTGCCTTCTTTGCCTTGTT
YLR244C	MAP1	MAP1-5'	CCTGGCCTGATGACTGGACT
		MAP1-3'	TGGGCCACCTGGTGATTTCT
YLR074C	BUD20	BUD20-5'	GGTGGGTCCGGAGAAGGAAA
		BUD20-3'	CGCCCACGGTAGAGTAGGTT
YKL060C	FBA1	FBA1-5'	CTGCCGTCGCTGCTTTAGAA
		FBA1-3'	GCGGCAATAGCACCCTTGAT
YJL121C	RPE1	RPE1-5'	ACTGTGGAACCTGGGTTTGGA
		RPE1-3'	CGGCTTTCGGGATGGTCTCC
YIL078W	THS1	THS1-5'	GCATCAATGTGCCACCATCCA
		THS1-3'	TGGATCATGACCGGTCTTTCGT
YHR170W	NMD3	NMD3-5'	ACGAGGATGAAGACGCTCCAC
		NMD3-3'	ACGGGTGTGTTCTCGACTCC
YGR211W	ZPR1	ZPR1-5'	TCGGATTCCATGGACGAAGCA
		ZPR1-3'	TGTATGTACGACCCGGCCAA
YGR264C	MES1	MES1-5'	TGCTCGTTACTGTAAGGGACGTAA
		MES1-3'	GTGTCACACCTTCCTCCAAAGC
YHR020W	YHR020W	YHR020W-5'	AGCTGTTCCAGTGGTTAAGGGT
		YHR020W-3'	GGCCCAAATGGTGAGAGGTG
YER091C	MET6	MET6-5'	GGAAGCTGCCGGTATCAAGGT
		MET6-3'	CGGCAGCCCAGGTGTAGTAA
YDR429C	TIF35	TIF35-5'	TCCCATTCGCACCCATTCCA
		TIF35-3'	CTTGTTCGGCAACTTCTTCGCT
YCR087C	YCR087C	YCR087C-A-5'	CCAGTGGCAACTCCTGCAAA
		YCR087C-A-3'	ACGACTTGCCCTTGTGAAGC
YAL060W	BDH1	BDH1-5'	CGACGTCTCTTGGTGTGGGA
		BDH1-3'	TGGCACTCTCCATCTTTAGGCA
YBR145W	ADH5	ADH5-5'	ATCGATGGTGGTAATGCCAAGC
		ADH5-3'	ACTCCATGAGAACCGCCATTAGT
YJR063W	RPA12	RPA12-5'	TGAATGCAGCCAATGTAAAGCCA
		RPA12-3'	GGCTCTAAGAGAAGATGGAAACGC
YLR387C	REH1	REH1-5'	CGCAGCCAAACCCTAACGAA
		REH1-3'	TCGCGACGGATCTGCGTATT
YPR010C	RPA135	RPA135-5'	ATGGCCAAAGGAGTGGCTTG
		RPA135-3'	TGCGCAGATTGGATCACCCT
YOL086C	ADH1	ADH1-5'	TGCTGTTCTAAAGGCCACTG
		ADH1-3'	AGAACAACACTTGGCACCAG
YGL255W	ZRT1	ZRT1-5'	CCACTTAATGGACCCTGCTT
		ZRT1-3'	ATGGCAGGACACCATGAATA
YKL175W	ZRT3	ZRT3-5'	TGAGCGTTACTGCAGGGTTC
		ZRT3-3'	GTGCCTGAGCTATGGGACTG
YDR167W	TAF10	TAF10-5'	GGCGTGCAGCAGATTTCACAA
		TAF10-3'	ACCGTCAGAACAACTTTGCTT
YBR109C	CMD1	CMD1-5'	TTGGCTCTGATGTCTCGTCAA
		CMD1-3'	GGCGGAGATTAAACCATCACC
YFL039C	ACT1	ACT1-5'	CCAGAAGCTTTGTTCCATCC
		ACT1-3'	ACGGACATCGACATCACACT
